# Supplementary material for: Differing Membrane Interactions of Two Highly Similar Drug-Metabolizing Cytochrome P450 Isoforms: CYP 2C9 and CYP 2C19
Source: Int J Mol Sci. 2019 Sep 4;20(18):4328. doi: 10.3390/ijms20184328 (PMC6770661; doi:10.3390/ijms20184328)
Supplement: Supplementary file 1 [file ijms-20-04328-s001.zip]

Archive with 9 entries (9 files):
- CYP_2C9_2C19_pdb/2C19-SIM2-2641_noWAT.pdb
- CYP_2C9_2C19_pdb/2C19_SIM1_final_noW.pdb
- CYP_2C9_2C19_pdb/2C19_SIM3_final_noW.pdb
- CYP_2C9_2C19_pdb/2C9-SIM2-6982_noWAT.pdb
- CYP_2C9_2C19_pdb/2C9_SIM1_final_noW.pdb
- CYP_2C9_2C19_pdb/2C9_SIM1_min_noW.pdb
- CYP_2C9_2C19_pdb/2C9_SIM3_final_noW.pdb
- CYP_2C9_2C19_pdb/README.txt
- ijms_supplementary_wade.pdf
