# Supplementary material for: Differing Membrane Interactions of Two Highly Similar Drug-Metabolizing Cytochrome P450 Isoforms: CYP 2C9 and CYP 2C19
Source: Int J Mol Sci. 2019 Sep 4;20(18):4328. doi: 10.3390/ijms20184328 (PMC6770661; doi:10.3390/ijms20184328)
Supplement: Supplementary file 1 [file ijms-20-04328-s001.zip › CYP_2C9_2C19_pdb/2C9-SIM2-6982_noWAT.pdb]

ATOM      1  N   MET X   1     203.368 230.113 260.910  1.00  0.00           N  
ATOM      2  CA  MET X   1     202.668 231.342 260.967  1.00  0.00           C  
ATOM      3  C   MET X   1     201.731 231.508 259.718  1.00  0.00           C  
ATOM      4  O   MET X   1     202.009 230.826 258.753  1.00  0.00           O  
ATOM      5  CB  MET X   1     203.678 232.469 261.127  1.00  0.00           C  
ATOM      6  CG  MET X   1     204.456 232.282 262.453  1.00  0.00           C  
ATOM      7  SD  MET X   1     205.653 233.613 262.883  1.00  0.00           S  
ATOM      8  CE  MET X   1     204.491 234.998 263.194  1.00  0.00           C  
ATOM      9  HA  MET X   1     201.955 231.249 261.786  1.00  0.00           H  
ATOM     10  HB2 MET X   1     204.332 232.396 260.259  1.00  0.00           H  
ATOM     11  HB3 MET X   1     203.237 233.455 261.274  1.00  0.00           H  
ATOM     12  HG2 MET X   1     203.740 232.202 263.271  1.00  0.00           H  
ATOM     13  HG3 MET X   1     205.073 231.391 262.336  1.00  0.00           H  
ATOM     14  HE1 MET X   1     203.670 234.688 263.840  1.00  0.00           H  
ATOM     15  HE2 MET X   1     205.095 235.680 263.792  1.00  0.00           H  
ATOM     16  HE3 MET X   1     204.178 235.464 262.260  1.00  0.00           H  
ATOM     17  H1  MET X   1     204.133 230.059 260.253  1.00  0.00           H  
ATOM     18  H2  MET X   1     203.747 229.827 261.801  1.00  0.00           H  
ATOM     19  H3  MET X   1     202.709 229.382 260.681  1.00  0.00           H  
ATOM     20  N   ASP X   2     200.599 232.114 259.784  1.00  0.00           N  
ATOM     21  CA  ASP X   2     200.051 233.147 260.725  1.00  0.00           C  
ATOM     22  C   ASP X   2     198.631 232.854 261.193  1.00  0.00           C  
ATOM     23  O   ASP X   2     197.730 233.677 261.265  1.00  0.00           O  
ATOM     24  CB  ASP X   2     200.189 234.482 260.000  1.00  0.00           C  
ATOM     25  CG  ASP X   2     199.298 234.575 258.719  1.00  0.00           C  
ATOM     26  OD1 ASP X   2     198.840 235.648 258.341  1.00  0.00           O  
ATOM     27  OD2 ASP X   2     199.082 233.632 257.945  1.00  0.00           O1-
ATOM     28  H   ASP X   2     200.104 231.980 258.914  1.00  0.00           H  
ATOM     29  HA  ASP X   2     200.724 233.247 261.577  1.00  0.00           H  
ATOM     30  HB2 ASP X   2     200.024 235.193 260.810  1.00  0.00           H  
ATOM     31  HB3 ASP X   2     201.223 234.564 259.663  1.00  0.00           H  
ATOM     32  N   SER X   3     198.392 231.604 261.516  1.00  0.00           N  
ATOM     33  CA  SER X   3     197.022 231.108 261.988  1.00  0.00           C  
ATOM     34  C   SER X   3     196.837 231.488 263.441  1.00  0.00           C  
ATOM     35  O   SER X   3     197.718 231.161 264.272  1.00  0.00           O  
ATOM     36  CB  SER X   3     196.880 229.598 261.695  1.00  0.00           C  
ATOM     37  OG  SER X   3     195.710 229.127 262.296  1.00  0.00           O  
ATOM     38  H   SER X   3     199.123 230.913 261.604  1.00  0.00           H  
ATOM     39  HA  SER X   3     196.293 231.677 261.412  1.00  0.00           H  
ATOM     40  HB2 SER X   3     196.856 229.357 260.632  1.00  0.00           H  
ATOM     41  HB3 SER X   3     197.741 229.060 262.092  1.00  0.00           H  
ATOM     42  HG  SER X   3     195.504 228.308 261.840  1.00  0.00           H  
ATOM     43  N   LEU X   4     195.659 231.978 263.774  1.00  0.00           N  
ATOM     44  CA  LEU X   4     195.207 232.082 265.182  1.00  0.00           C  
ATOM     45  C   LEU X   4     194.638 230.775 265.801  1.00  0.00           C  
ATOM     46  O   LEU X   4     194.361 230.855 266.998  1.00  0.00           O  
ATOM     47  CB  LEU X   4     194.208 233.235 265.374  1.00  0.00           C  
ATOM     48  CG  LEU X   4     194.683 234.593 264.768  1.00  0.00           C  
ATOM     49  CD1 LEU X   4     193.615 235.630 265.124  1.00  0.00           C  
ATOM     50  CD2 LEU X   4     195.979 235.184 265.313  1.00  0.00           C  
ATOM     51  H   LEU X   4     195.017 232.166 263.017  1.00  0.00           H  
ATOM     52  HA  LEU X   4     196.102 232.372 265.731  1.00  0.00           H  
ATOM     53  HB2 LEU X   4     193.277 233.062 264.833  1.00  0.00           H  
ATOM     54  HB3 LEU X   4     194.185 233.344 266.459  1.00  0.00           H  
ATOM     55  HG  LEU X   4     194.796 234.336 263.714  1.00  0.00           H  
ATOM     56 HD11 LEU X   4     193.534 235.816 266.194  1.00  0.00           H  
ATOM     57 HD12 LEU X   4     192.612 235.428 264.747  1.00  0.00           H  
ATOM     58 HD13 LEU X   4     193.842 236.612 264.708  1.00  0.00           H  
ATOM     59 HD21 LEU X   4     195.795 235.622 266.293  1.00  0.00           H  
ATOM     60 HD22 LEU X   4     196.298 235.945 264.601  1.00  0.00           H  
ATOM     61 HD23 LEU X   4     196.785 234.452 265.258  1.00  0.00           H  
ATOM     62  N   VAL X   5     194.357 229.667 265.033  1.00  0.00           N  
ATOM     63  CA  VAL X   5     193.336 228.709 265.501  1.00  0.00           C  
ATOM     64  C   VAL X   5     193.829 227.739 266.633  1.00  0.00           C  
ATOM     65  O   VAL X   5     193.079 227.341 267.525  1.00  0.00           O  
ATOM     66  CB  VAL X   5     192.822 227.989 264.246  1.00  0.00           C  
ATOM     67  CG1 VAL X   5     191.597 227.083 264.645  1.00  0.00           C  
ATOM     68  CG2 VAL X   5     192.298 229.006 263.139  1.00  0.00           C  
ATOM     69  H   VAL X   5     194.648 229.682 264.066  1.00  0.00           H  
ATOM     70  HA  VAL X   5     192.501 229.295 265.887  1.00  0.00           H  
ATOM     71  HB  VAL X   5     193.546 227.301 263.811  1.00  0.00           H  
ATOM     72 HG11 VAL X   5     191.206 226.481 263.825  1.00  0.00           H  
ATOM     73 HG12 VAL X   5     191.752 226.301 265.389  1.00  0.00           H  
ATOM     74 HG13 VAL X   5     190.764 227.681 265.015  1.00  0.00           H  
ATOM     75 HG21 VAL X   5     193.152 229.454 262.630  1.00  0.00           H  
ATOM     76 HG22 VAL X   5     191.665 229.741 263.637  1.00  0.00           H  
ATOM     77 HG23 VAL X   5     191.605 228.575 262.417  1.00  0.00           H  
ATOM     78  N   VAL X   6     195.146 227.336 266.611  1.00  0.00           N  
ATOM     79  CA  VAL X   6     195.624 226.560 267.806  1.00  0.00           C  
ATOM     80  C   VAL X   6     196.064 227.458 268.935  1.00  0.00           C  
ATOM     81  O   VAL X   6     196.097 227.047 270.133  1.00  0.00           O  
ATOM     82  CB  VAL X   6     196.849 225.677 267.403  1.00  0.00           C  
ATOM     83  CG1 VAL X   6     197.402 224.727 268.469  1.00  0.00           C  
ATOM     84  CG2 VAL X   6     196.543 224.809 266.212  1.00  0.00           C  
ATOM     85  H   VAL X   6     195.764 227.699 265.899  1.00  0.00           H  
ATOM     86  HA  VAL X   6     194.927 225.821 268.201  1.00  0.00           H  
ATOM     87  HB  VAL X   6     197.704 226.275 267.088  1.00  0.00           H  
ATOM     88 HG11 VAL X   6     198.039 225.225 269.200  1.00  0.00           H  
ATOM     89 HG12 VAL X   6     196.598 224.195 268.978  1.00  0.00           H  
ATOM     90 HG13 VAL X   6     198.046 224.084 267.868  1.00  0.00           H  
ATOM     91 HG21 VAL X   6     195.803 225.312 265.589  1.00  0.00           H  
ATOM     92 HG22 VAL X   6     195.984 223.919 266.505  1.00  0.00           H  
ATOM     93 HG23 VAL X   6     197.461 224.583 265.670  1.00  0.00           H  
ATOM     94  N   LEU X   7     196.353 228.760 268.659  1.00  0.00           N  
ATOM     95  CA  LEU X   7     196.790 229.803 269.516  1.00  0.00           C  
ATOM     96  C   LEU X   7     195.646 230.288 270.448  1.00  0.00           C  
ATOM     97  O   LEU X   7     195.901 230.333 271.714  1.00  0.00           O  
ATOM     98  CB  LEU X   7     197.571 230.858 268.812  1.00  0.00           C  
ATOM     99  CG  LEU X   7     198.331 231.781 269.748  1.00  0.00           C  
ATOM    100  CD1 LEU X   7     199.427 231.091 270.648  1.00  0.00           C  
ATOM    101  CD2 LEU X   7     199.026 232.918 268.960  1.00  0.00           C  
ATOM    102  H   LEU X   7     196.303 229.015 267.682  1.00  0.00           H  
ATOM    103  HA  LEU X   7     197.587 229.304 270.066  1.00  0.00           H  
ATOM    104  HB2 LEU X   7     198.205 230.400 268.053  1.00  0.00           H  
ATOM    105  HB3 LEU X   7     196.919 231.473 268.192  1.00  0.00           H  
ATOM    106  HG  LEU X   7     197.635 232.306 270.402  1.00  0.00           H  
ATOM    107 HD11 LEU X   7     200.203 230.693 269.995  1.00  0.00           H  
ATOM    108 HD12 LEU X   7     199.011 230.373 271.355  1.00  0.00           H  
ATOM    109 HD13 LEU X   7     199.882 231.827 271.311  1.00  0.00           H  
ATOM    110 HD21 LEU X   7     199.591 233.568 269.629  1.00  0.00           H  
ATOM    111 HD22 LEU X   7     199.676 232.436 268.230  1.00  0.00           H  
ATOM    112 HD23 LEU X   7     198.305 233.554 268.447  1.00  0.00           H  
ATOM    113  N   VAL X   8     194.431 230.556 269.976  1.00  0.00           N  
ATOM    114  CA  VAL X   8     193.230 230.823 270.680  1.00  0.00           C  
ATOM    115  C   VAL X   8     192.954 229.698 271.634  1.00  0.00           C  
ATOM    116  O   VAL X   8     192.594 229.845 272.812  1.00  0.00           O  
ATOM    117  CB  VAL X   8     192.037 231.051 269.662  1.00  0.00           C  
ATOM    118  CG1 VAL X   8     190.700 230.698 270.316  1.00  0.00           C  
ATOM    119  CG2 VAL X   8     191.963 232.525 269.110  1.00  0.00           C  
ATOM    120  H   VAL X   8     194.345 230.513 268.971  1.00  0.00           H  
ATOM    121  HA  VAL X   8     193.342 231.699 271.318  1.00  0.00           H  
ATOM    122  HB  VAL X   8     192.151 230.361 268.826  1.00  0.00           H  
ATOM    123 HG11 VAL X   8     189.915 230.833 269.571  1.00  0.00           H  
ATOM    124 HG12 VAL X   8     190.685 229.644 270.594  1.00  0.00           H  
ATOM    125 HG13 VAL X   8     190.699 231.256 271.252  1.00  0.00           H  
ATOM    126 HG21 VAL X   8     191.331 232.524 268.221  1.00  0.00           H  
ATOM    127 HG22 VAL X   8     192.888 232.864 268.644  1.00  0.00           H  
ATOM    128 HG23 VAL X   8     191.472 233.266 269.741  1.00  0.00           H  
ATOM    129  N   LEU X   9     193.241 228.455 271.201  1.00  0.00           N  
ATOM    130  CA  LEU X   9     193.058 227.281 272.002  1.00  0.00           C  
ATOM    131  C   LEU X   9     194.092 227.075 273.144  1.00  0.00           C  
ATOM    132  O   LEU X   9     193.711 226.730 274.248  1.00  0.00           O  
ATOM    133  CB  LEU X   9     192.856 226.004 271.047  1.00  0.00           C  
ATOM    134  CG  LEU X   9     191.442 225.943 270.433  1.00  0.00           C  
ATOM    135  CD1 LEU X   9     191.380 224.877 269.308  1.00  0.00           C  
ATOM    136  CD2 LEU X   9     190.398 225.590 271.528  1.00  0.00           C  
ATOM    137  H   LEU X   9     193.741 228.298 270.338  1.00  0.00           H  
ATOM    138  HA  LEU X   9     192.097 227.432 272.493  1.00  0.00           H  
ATOM    139  HB2 LEU X   9     193.529 226.123 270.198  1.00  0.00           H  
ATOM    140  HB3 LEU X   9     192.950 225.062 271.586  1.00  0.00           H  
ATOM    141  HG  LEU X   9     191.291 226.871 269.881  1.00  0.00           H  
ATOM    142 HD11 LEU X   9     191.238 223.876 269.716  1.00  0.00           H  
ATOM    143 HD12 LEU X   9     192.362 224.900 268.836  1.00  0.00           H  
ATOM    144 HD13 LEU X   9     190.740 225.127 268.462  1.00  0.00           H  
ATOM    145 HD21 LEU X   9     190.289 226.412 272.236  1.00  0.00           H  
ATOM    146 HD22 LEU X   9     189.448 225.328 271.063  1.00  0.00           H  
ATOM    147 HD23 LEU X   9     190.888 224.805 272.105  1.00  0.00           H  
ATOM    148  N   CYS X  10     195.399 227.412 272.890  1.00  0.00           N  
ATOM    149  CA  CYS X  10     196.522 227.320 273.816  1.00  0.00           C  
ATOM    150  C   CYS X  10     196.240 228.276 274.991  1.00  0.00           C  
ATOM    151  O   CYS X  10     196.283 227.859 276.143  1.00  0.00           O  
ATOM    152  CB  CYS X  10     197.834 227.622 273.076  1.00  0.00           C  
ATOM    153  SG  CYS X  10     199.199 227.718 274.253  1.00  0.00           S  
ATOM    154  H   CYS X  10     195.538 227.595 271.906  1.00  0.00           H  
ATOM    155  HA  CYS X  10     196.554 226.351 274.313  1.00  0.00           H  
ATOM    156  HB2 CYS X  10     197.996 226.808 272.369  1.00  0.00           H  
ATOM    157  HB3 CYS X  10     197.872 228.563 272.527  1.00  0.00           H  
ATOM    158  HG  CYS X  10     199.374 226.429 274.559  1.00  0.00           H  
ATOM    159  N   LEU X  11     195.990 229.572 274.709  1.00  0.00           N  
ATOM    160  CA  LEU X  11     195.608 230.636 275.665  1.00  0.00           C  
ATOM    161  C   LEU X  11     194.366 230.285 276.468  1.00  0.00           C  
ATOM    162  O   LEU X  11     194.296 230.649 277.605  1.00  0.00           O  
ATOM    163  CB  LEU X  11     195.506 232.018 274.995  1.00  0.00           C  
ATOM    164  CG  LEU X  11     196.810 232.459 274.340  1.00  0.00           C  
ATOM    165  CD1 LEU X  11     196.504 233.609 273.356  1.00  0.00           C  
ATOM    166  CD2 LEU X  11     197.721 232.944 275.428  1.00  0.00           C  
ATOM    167  H   LEU X  11     195.940 229.854 273.741  1.00  0.00           H  
ATOM    168  HA  LEU X  11     196.434 230.593 276.375  1.00  0.00           H  
ATOM    169  HB2 LEU X  11     194.712 232.126 274.256  1.00  0.00           H  
ATOM    170  HB3 LEU X  11     195.153 232.705 275.764  1.00  0.00           H  
ATOM    171  HG  LEU X  11     197.296 231.686 273.744  1.00  0.00           H  
ATOM    172 HD11 LEU X  11     195.982 233.234 272.475  1.00  0.00           H  
ATOM    173 HD12 LEU X  11     197.393 234.068 272.924  1.00  0.00           H  
ATOM    174 HD13 LEU X  11     195.830 234.360 273.768  1.00  0.00           H  
ATOM    175 HD21 LEU X  11     197.214 233.709 276.017  1.00  0.00           H  
ATOM    176 HD22 LEU X  11     198.094 232.156 276.082  1.00  0.00           H  
ATOM    177 HD23 LEU X  11     198.592 233.399 274.958  1.00  0.00           H  
ATOM    178  N   SER X  12     193.415 229.592 275.907  1.00  0.00           N  
ATOM    179  CA  SER X  12     192.209 229.146 276.614  1.00  0.00           C  
ATOM    180  C   SER X  12     192.536 228.135 277.569  1.00  0.00           C  
ATOM    181  O   SER X  12     191.809 228.118 278.573  1.00  0.00           O  
ATOM    182  CB  SER X  12     191.159 228.459 275.671  1.00  0.00           C  
ATOM    183  OG  SER X  12     190.703 229.524 274.900  1.00  0.00           O  
ATOM    184  H   SER X  12     193.601 229.538 274.916  1.00  0.00           H  
ATOM    185  HA  SER X  12     191.722 229.907 277.224  1.00  0.00           H  
ATOM    186  HB2 SER X  12     191.615 227.667 275.077  1.00  0.00           H  
ATOM    187  HB3 SER X  12     190.308 228.142 276.275  1.00  0.00           H  
ATOM    188  HG  SER X  12     191.250 229.586 274.113  1.00  0.00           H  
ATOM    189  N   CYS X  13     193.590 227.295 277.435  1.00  0.00           N  
ATOM    190  CA  CYS X  13     193.980 226.342 278.455  1.00  0.00           C  
ATOM    191  C   CYS X  13     194.765 227.048 279.521  1.00  0.00           C  
ATOM    192  O   CYS X  13     194.823 226.521 280.669  1.00  0.00           O  
ATOM    193  CB  CYS X  13     194.857 225.320 277.764  1.00  0.00           C  
ATOM    194  SG  CYS X  13     194.050 224.391 276.386  1.00  0.00           S  
ATOM    195  H   CYS X  13     194.054 227.292 276.538  1.00  0.00           H  
ATOM    196  HA  CYS X  13     193.135 225.781 278.856  1.00  0.00           H  
ATOM    197  HB2 CYS X  13     195.669 225.846 277.262  1.00  0.00           H  
ATOM    198  HB3 CYS X  13     195.263 224.671 278.539  1.00  0.00           H  
ATOM    199  HG  CYS X  13     194.126 225.345 275.454  1.00  0.00           H  
ATOM    200  N   LEU X  14     195.406 228.128 279.241  1.00  0.00           N  
ATOM    201  CA  LEU X  14     196.058 228.797 280.374  1.00  0.00           C  
ATOM    202  C   LEU X  14     195.044 229.507 281.278  1.00  0.00           C  
ATOM    203  O   LEU X  14     195.240 229.609 282.467  1.00  0.00           O  
ATOM    204  CB  LEU X  14     197.144 229.764 279.779  1.00  0.00           C  
ATOM    205  CG  LEU X  14     197.958 230.530 280.916  1.00  0.00           C  
ATOM    206  CD1 LEU X  14     198.764 229.592 281.895  1.00  0.00           C  
ATOM    207  CD2 LEU X  14     198.930 231.414 280.125  1.00  0.00           C  
ATOM    208  H   LEU X  14     195.342 228.528 278.316  1.00  0.00           H  
ATOM    209  HA  LEU X  14     196.587 228.080 281.002  1.00  0.00           H  
ATOM    210  HB2 LEU X  14     197.896 229.131 279.306  1.00  0.00           H  
ATOM    211  HB3 LEU X  14     196.762 230.477 279.048  1.00  0.00           H  
ATOM    212  HG  LEU X  14     197.329 231.172 281.532  1.00  0.00           H  
ATOM    213 HD11 LEU X  14     199.486 230.148 282.492  1.00  0.00           H  
ATOM    214 HD12 LEU X  14     199.300 228.880 281.267  1.00  0.00           H  
ATOM    215 HD13 LEU X  14     198.071 229.037 282.527  1.00  0.00           H  
ATOM    216 HD21 LEU X  14     199.516 232.067 280.772  1.00  0.00           H  
ATOM    217 HD22 LEU X  14     199.570 230.750 279.543  1.00  0.00           H  
ATOM    218 HD23 LEU X  14     198.427 232.029 279.379  1.00  0.00           H  
ATOM    219  N   LEU X  15     193.989 229.973 280.610  1.00  0.00           N  
ATOM    220  CA  LEU X  15     192.800 230.504 281.176  1.00  0.00           C  
ATOM    221  C   LEU X  15     192.073 229.499 282.057  1.00  0.00           C  
ATOM    222  O   LEU X  15     192.009 229.675 283.256  1.00  0.00           O  
ATOM    223  CB  LEU X  15     191.947 231.172 280.064  1.00  0.00           C  
ATOM    224  CG  LEU X  15     190.499 231.414 280.413  1.00  0.00           C  
ATOM    225  CD1 LEU X  15     190.258 232.246 281.692  1.00  0.00           C  
ATOM    226  CD2 LEU X  15     189.799 232.189 279.279  1.00  0.00           C  
ATOM    227  H   LEU X  15     193.903 229.750 279.629  1.00  0.00           H  
ATOM    228  HA  LEU X  15     193.051 231.278 281.901  1.00  0.00           H  
ATOM    229  HB2 LEU X  15     192.421 232.088 279.712  1.00  0.00           H  
ATOM    230  HB3 LEU X  15     191.926 230.434 279.262  1.00  0.00           H  
ATOM    231  HG  LEU X  15     190.007 230.442 280.440  1.00  0.00           H  
ATOM    232 HD11 LEU X  15     190.941 233.093 281.643  1.00  0.00           H  
ATOM    233 HD12 LEU X  15     190.640 231.714 282.564  1.00  0.00           H  
ATOM    234 HD13 LEU X  15     189.223 232.504 281.917  1.00  0.00           H  
ATOM    235 HD21 LEU X  15     189.883 231.534 278.412  1.00  0.00           H  
ATOM    236 HD22 LEU X  15     188.787 232.457 279.584  1.00  0.00           H  
ATOM    237 HD23 LEU X  15     190.398 233.068 279.039  1.00  0.00           H  
ATOM    238  N   LEU X  16     191.746 228.354 281.492  1.00  0.00           N  
ATOM    239  CA  LEU X  16     191.170 227.301 282.285  1.00  0.00           C  
ATOM    240  C   LEU X  16     192.125 226.754 283.378  1.00  0.00           C  
ATOM    241  O   LEU X  16     191.670 226.305 284.455  1.00  0.00           O  
ATOM    242  CB  LEU X  16     190.771 226.202 281.282  1.00  0.00           C  
ATOM    243  CG  LEU X  16     189.947 225.097 282.022  1.00  0.00           C  
ATOM    244  CD1 LEU X  16     188.696 225.820 282.581  1.00  0.00           C  
ATOM    245  CD2 LEU X  16     189.523 224.058 281.001  1.00  0.00           C  
ATOM    246  H   LEU X  16     191.853 228.218 280.497  1.00  0.00           H  
ATOM    247  HA  LEU X  16     190.343 227.765 282.822  1.00  0.00           H  
ATOM    248  HB2 LEU X  16     190.293 226.592 280.383  1.00  0.00           H  
ATOM    249  HB3 LEU X  16     191.703 225.756 280.937  1.00  0.00           H  
ATOM    250  HG  LEU X  16     190.542 224.699 282.844  1.00  0.00           H  
ATOM    251 HD11 LEU X  16     188.094 226.312 281.817  1.00  0.00           H  
ATOM    252 HD12 LEU X  16     188.990 226.387 283.465  1.00  0.00           H  
ATOM    253 HD13 LEU X  16     188.027 225.104 283.057  1.00  0.00           H  
ATOM    254 HD21 LEU X  16     188.937 223.199 281.327  1.00  0.00           H  
ATOM    255 HD22 LEU X  16     189.018 224.487 280.135  1.00  0.00           H  
ATOM    256 HD23 LEU X  16     190.459 223.707 280.567  1.00  0.00           H  
ATOM    257  N   LEU X  17     193.445 226.801 283.150  1.00  0.00           N  
ATOM    258  CA  LEU X  17     194.387 226.615 284.285  1.00  0.00           C  
ATOM    259  C   LEU X  17     194.378 227.684 285.425  1.00  0.00           C  
ATOM    260  O   LEU X  17     194.544 227.335 286.555  1.00  0.00           O  
ATOM    261  CB  LEU X  17     195.770 226.291 283.722  1.00  0.00           C  
ATOM    262  CG  LEU X  17     196.815 225.804 284.814  1.00  0.00           C  
ATOM    263  CD1 LEU X  17     196.560 224.419 285.405  1.00  0.00           C  
ATOM    264  CD2 LEU X  17     198.233 225.860 284.200  1.00  0.00           C  
ATOM    265  H   LEU X  17     193.747 227.098 282.233  1.00  0.00           H  
ATOM    266  HA  LEU X  17     193.991 225.720 284.764  1.00  0.00           H  
ATOM    267  HB2 LEU X  17     195.574 225.402 283.123  1.00  0.00           H  
ATOM    268  HB3 LEU X  17     196.076 227.192 283.190  1.00  0.00           H  
ATOM    269  HG  LEU X  17     196.839 226.480 285.669  1.00  0.00           H  
ATOM    270 HD11 LEU X  17     195.754 224.501 286.134  1.00  0.00           H  
ATOM    271 HD12 LEU X  17     197.467 224.083 285.908  1.00  0.00           H  
ATOM    272 HD13 LEU X  17     196.298 223.670 284.658  1.00  0.00           H  
ATOM    273 HD21 LEU X  17     198.424 226.905 283.957  1.00  0.00           H  
ATOM    274 HD22 LEU X  17     198.950 225.546 284.959  1.00  0.00           H  
ATOM    275 HD23 LEU X  17     198.228 225.195 283.336  1.00  0.00           H  
ATOM    276  N   SER X  18     194.162 228.896 285.024  1.00  0.00           N  
ATOM    277  CA  SER X  18     194.027 230.005 285.901  1.00  0.00           C  
ATOM    278  C   SER X  18     192.691 229.932 286.634  1.00  0.00           C  
ATOM    279  O   SER X  18     192.634 230.220 287.806  1.00  0.00           O  
ATOM    280  CB  SER X  18     194.149 231.402 285.134  1.00  0.00           C  
ATOM    281  OG  SER X  18     195.397 231.352 284.478  1.00  0.00           O  
ATOM    282  H   SER X  18     193.983 229.023 284.038  1.00  0.00           H  
ATOM    283  HA  SER X  18     194.819 229.955 286.648  1.00  0.00           H  
ATOM    284  HB2 SER X  18     193.391 231.474 284.354  1.00  0.00           H  
ATOM    285  HB3 SER X  18     194.069 232.364 285.640  1.00  0.00           H  
ATOM    286  HG  SER X  18     195.410 230.692 283.781  1.00  0.00           H  
ATOM    287  N   LEU X  19     191.554 229.551 286.025  1.00  0.00           N  
ATOM    288  CA  LEU X  19     190.407 229.104 286.749  1.00  0.00           C  
ATOM    289  C   LEU X  19     190.717 228.045 287.742  1.00  0.00           C  
ATOM    290  O   LEU X  19     190.236 228.102 288.876  1.00  0.00           O  
ATOM    291  CB  LEU X  19     189.291 228.693 285.804  1.00  0.00           C  
ATOM    292  CG  LEU X  19     188.784 229.779 284.803  1.00  0.00           C  
ATOM    293  CD1 LEU X  19     187.938 229.339 283.601  1.00  0.00           C  
ATOM    294  CD2 LEU X  19     188.016 230.893 285.527  1.00  0.00           C  
ATOM    295  H   LEU X  19     191.538 229.213 285.074  1.00  0.00           H  
ATOM    296  HA  LEU X  19     189.960 229.941 287.284  1.00  0.00           H  
ATOM    297  HB2 LEU X  19     189.762 227.893 285.233  1.00  0.00           H  
ATOM    298  HB3 LEU X  19     188.419 228.275 286.307  1.00  0.00           H  
ATOM    299  HG  LEU X  19     189.660 230.346 284.488  1.00  0.00           H  
ATOM    300 HD11 LEU X  19     188.511 228.680 282.948  1.00  0.00           H  
ATOM    301 HD12 LEU X  19     187.553 230.251 283.143  1.00  0.00           H  
ATOM    302 HD13 LEU X  19     187.096 228.771 283.996  1.00  0.00           H  
ATOM    303 HD21 LEU X  19     188.503 231.097 286.481  1.00  0.00           H  
ATOM    304 HD22 LEU X  19     187.900 231.816 284.958  1.00  0.00           H  
ATOM    305 HD23 LEU X  19     186.999 230.563 285.737  1.00  0.00           H  
ATOM    306  N   TRP X  20     191.618 227.030 287.379  1.00  0.00           N  
ATOM    307  CA  TRP X  20     191.976 225.984 288.358  1.00  0.00           C  
ATOM    308  C   TRP X  20     192.669 226.571 289.556  1.00  0.00           C  
ATOM    309  O   TRP X  20     192.216 226.271 290.673  1.00  0.00           O  
ATOM    310  CB  TRP X  20     192.748 224.826 287.639  1.00  0.00           C  
ATOM    311  CG  TRP X  20     193.135 223.638 288.517  1.00  0.00           C  
ATOM    312  CD1 TRP X  20     192.627 223.337 289.753  1.00  0.00           C  
ATOM    313  CD2 TRP X  20     193.906 222.463 288.140  1.00  0.00           C  
ATOM    314  CE2 TRP X  20     193.726 221.472 289.170  1.00  0.00           C  
ATOM    315  CE3 TRP X  20     194.660 222.079 287.042  1.00  0.00           C  
ATOM    316  NE1 TRP X  20     193.167 222.142 290.191  1.00  0.00           N  
ATOM    317  CZ2 TRP X  20     194.187 220.110 289.078  1.00  0.00           C  
ATOM    318  CZ3 TRP X  20     195.129 220.763 286.929  1.00  0.00           C  
ATOM    319  CH2 TRP X  20     194.928 219.768 287.917  1.00  0.00           C  
ATOM    320  H   TRP X  20     191.808 226.833 286.407  1.00  0.00           H  
ATOM    321  HA  TRP X  20     191.085 225.489 288.743  1.00  0.00           H  
ATOM    322  HB2 TRP X  20     192.166 224.441 286.802  1.00  0.00           H  
ATOM    323  HB3 TRP X  20     193.644 225.250 287.186  1.00  0.00           H  
ATOM    324  HD1 TRP X  20     191.835 223.897 290.228  1.00  0.00           H  
ATOM    325  HE1 TRP X  20     192.777 221.632 290.971  1.00  0.00           H  
ATOM    326  HE3 TRP X  20     194.595 222.751 286.199  1.00  0.00           H  
ATOM    327  HZ2 TRP X  20     193.994 219.448 289.909  1.00  0.00           H  
ATOM    328  HZ3 TRP X  20     195.754 220.551 286.075  1.00  0.00           H  
ATOM    329  HH2 TRP X  20     195.219 218.736 287.796  1.00  0.00           H  
ATOM    330  N   ARG X  21     193.646 227.445 289.434  1.00  0.00           N  
ATOM    331  CA  ARG X  21     194.619 227.801 290.487  1.00  0.00           C  
ATOM    332  C   ARG X  21     195.130 229.208 290.315  1.00  0.00           C  
ATOM    333  O   ARG X  21     195.888 229.463 289.347  1.00  0.00           O  
ATOM    334  CB  ARG X  21     195.713 226.786 290.668  1.00  0.00           C  
ATOM    335  CG  ARG X  21     196.474 226.345 289.394  1.00  0.00           C  
ATOM    336  CD  ARG X  21     197.481 225.170 289.691  1.00  0.00           C  
ATOM    337  NE  ARG X  21     198.633 225.714 290.415  1.00  0.00           N  
ATOM    338  CZ  ARG X  21     199.875 225.306 290.519  1.00  0.00           C  
ATOM    339  NH1 ARG X  21     200.308 224.222 290.001  1.00  0.00           N1+
ATOM    340  NH2 ARG X  21     200.606 226.056 291.221  1.00  0.00           N  
ATOM    341  H   ARG X  21     193.605 227.894 288.530  1.00  0.00           H  
ATOM    342  HA  ARG X  21     194.042 227.744 291.409  1.00  0.00           H  
ATOM    343  HB2 ARG X  21     196.266 227.258 291.480  1.00  0.00           H  
ATOM    344  HB3 ARG X  21     195.228 225.896 291.067  1.00  0.00           H  
ATOM    345  HG2 ARG X  21     195.760 225.859 288.730  1.00  0.00           H  
ATOM    346  HG3 ARG X  21     196.835 227.201 288.825  1.00  0.00           H  
ATOM    347  HD2 ARG X  21     196.951 224.377 290.219  1.00  0.00           H  
ATOM    348  HD3 ARG X  21     197.791 224.804 288.713  1.00  0.00           H  
ATOM    349  HE  ARG X  21     198.546 226.650 290.783  1.00  0.00           H  
ATOM    350 HH11 ARG X  21     199.865 223.678 289.274  1.00  0.00           H  
ATOM    351 HH12 ARG X  21     201.219 223.974 290.361  1.00  0.00           H  
ATOM    352 HH21 ARG X  21     200.202 226.868 291.666  1.00  0.00           H  
ATOM    353 HH22 ARG X  21     201.604 225.906 291.221  1.00  0.00           H  
ATOM    354  N   GLN X  22     194.865 230.126 291.278  1.00  0.00           N  
ATOM    355  CA  GLN X  22     195.498 231.516 291.266  1.00  0.00           C  
ATOM    356  C   GLN X  22     197.051 231.536 291.138  1.00  0.00           C  
ATOM    357  O   GLN X  22     197.623 232.501 290.586  1.00  0.00           O  
ATOM    358  CB  GLN X  22     195.000 232.100 292.582  1.00  0.00           C  
ATOM    359  CG  GLN X  22     195.189 233.620 292.639  1.00  0.00           C  
ATOM    360  CD  GLN X  22     193.823 234.335 292.316  1.00  0.00           C  
ATOM    361  NE2 GLN X  22     193.225 235.054 293.222  1.00  0.00           N  
ATOM    362  OE1 GLN X  22     193.436 234.372 291.124  1.00  0.00           O  
ATOM    363  H   GLN X  22     194.300 229.783 292.042  1.00  0.00           H  
ATOM    364  HA  GLN X  22     195.142 232.129 290.438  1.00  0.00           H  
ATOM    365  HB2 GLN X  22     193.960 231.897 292.837  1.00  0.00           H  
ATOM    366  HB3 GLN X  22     195.621 231.699 293.383  1.00  0.00           H  
ATOM    367  HG2 GLN X  22     195.494 233.921 293.641  1.00  0.00           H  
ATOM    368  HG3 GLN X  22     196.042 233.962 292.052  1.00  0.00           H  
ATOM    369 HE21 GLN X  22     192.402 235.605 293.021  1.00  0.00           H  
ATOM    370 HE22 GLN X  22     193.644 235.092 294.140  1.00  0.00           H  
ATOM    371  N   SER X  23     197.626 230.495 291.695  1.00  0.00           N  
ATOM    372  CA  SER X  23     199.094 230.244 291.649  1.00  0.00           C  
ATOM    373  C   SER X  23     199.567 230.039 290.216  1.00  0.00           C  
ATOM    374  O   SER X  23     200.729 229.767 290.011  1.00  0.00           O  
ATOM    375  CB  SER X  23     199.605 229.085 292.576  1.00  0.00           C  
ATOM    376  OG  SER X  23     198.812 227.977 292.307  1.00  0.00           O  
ATOM    377  H   SER X  23     197.042 230.095 292.415  1.00  0.00           H  
ATOM    378  HA  SER X  23     199.478 231.156 292.106  1.00  0.00           H  
ATOM    379  HB2 SER X  23     200.657 228.824 292.463  1.00  0.00           H  
ATOM    380  HB3 SER X  23     199.317 229.406 293.577  1.00  0.00           H  
ATOM    381  HG  SER X  23     198.081 228.217 292.882  1.00  0.00           H  
ATOM    382  N   SER X  24     198.737 230.215 289.147  1.00  0.00           N  
ATOM    383  CA  SER X  24     199.256 230.492 287.856  1.00  0.00           C  
ATOM    384  C   SER X  24     200.049 231.846 287.832  1.00  0.00           C  
ATOM    385  O   SER X  24     200.517 232.201 286.784  1.00  0.00           O  
ATOM    386  CB  SER X  24     198.064 230.441 286.775  1.00  0.00           C  
ATOM    387  OG  SER X  24     197.690 229.077 286.755  1.00  0.00           O  
ATOM    388  H   SER X  24     197.757 230.436 289.245  1.00  0.00           H  
ATOM    389  HA  SER X  24     199.894 229.698 287.466  1.00  0.00           H  
ATOM    390  HB2 SER X  24     197.223 231.130 286.863  1.00  0.00           H  
ATOM    391  HB3 SER X  24     198.464 230.759 285.812  1.00  0.00           H  
ATOM    392  HG  SER X  24     197.181 228.719 287.485  1.00  0.00           H  
ATOM    393  N   GLY X  25     200.176 232.574 288.903  1.00  0.00           N  
ATOM    394  CA  GLY X  25     201.148 233.689 288.927  1.00  0.00           C  
ATOM    395  C   GLY X  25     201.154 234.449 290.272  1.00  0.00           C  
ATOM    396  O   GLY X  25     200.733 233.862 291.335  1.00  0.00           O  
ATOM    397  H   GLY X  25     199.714 232.296 289.758  1.00  0.00           H  
ATOM    398  HA2 GLY X  25     202.158 233.387 288.648  1.00  0.00           H  
ATOM    399  HA3 GLY X  25     200.877 234.439 288.184  1.00  0.00           H  
ATOM    400  N   ARG X  26     201.758 235.655 290.248  1.00  0.00           N  
ATOM    401  CA  ARG X  26     201.939 236.670 291.398  1.00  0.00           C  
ATOM    402  C   ARG X  26     200.834 237.736 291.422  1.00  0.00           C  
ATOM    403  O   ARG X  26     200.669 238.530 290.533  1.00  0.00           O  
ATOM    404  CB  ARG X  26     203.333 237.304 291.084  1.00  0.00           C  
ATOM    405  CG  ARG X  26     204.531 236.356 291.095  1.00  0.00           C  
ATOM    406  CD  ARG X  26     205.895 237.032 291.190  1.00  0.00           C  
ATOM    407  NE  ARG X  26     206.061 238.183 290.213  1.00  0.00           N  
ATOM    408  CZ  ARG X  26     207.191 238.759 289.977  1.00  0.00           C  
ATOM    409  NH1 ARG X  26     208.292 238.426 290.532  1.00  0.00           N1+
ATOM    410  NH2 ARG X  26     207.291 239.561 288.978  1.00  0.00           N  
ATOM    411  H   ARG X  26     202.170 235.936 289.369  1.00  0.00           H  
ATOM    412  HA  ARG X  26     202.027 236.296 292.418  1.00  0.00           H  
ATOM    413  HB2 ARG X  26     203.221 237.876 290.163  1.00  0.00           H  
ATOM    414  HB3 ARG X  26     203.513 238.035 291.872  1.00  0.00           H  
ATOM    415  HG2 ARG X  26     204.417 235.687 291.947  1.00  0.00           H  
ATOM    416  HG3 ARG X  26     204.506 235.687 290.234  1.00  0.00           H  
ATOM    417  HD2 ARG X  26     205.972 237.408 292.210  1.00  0.00           H  
ATOM    418  HD3 ARG X  26     206.594 236.229 290.956  1.00  0.00           H  
ATOM    419  HE  ARG X  26     205.292 238.522 289.652  1.00  0.00           H  
ATOM    420 HH11 ARG X  26     208.219 237.879 291.378  1.00  0.00           H  
ATOM    421 HH12 ARG X  26     209.091 239.008 290.327  1.00  0.00           H  
ATOM    422 HH21 ARG X  26     206.504 240.004 288.525  1.00  0.00           H  
ATOM    423 HH22 ARG X  26     208.151 240.055 288.788  1.00  0.00           H  
ATOM    424  N   GLY X  27     200.048 237.696 292.522  1.00  0.00           N  
ATOM    425  CA  GLY X  27     198.963 238.651 292.734  1.00  0.00           C  
ATOM    426  C   GLY X  27     197.662 238.425 291.861  1.00  0.00           C  
ATOM    427  O   GLY X  27     197.168 237.328 291.534  1.00  0.00           O  
ATOM    428  H   GLY X  27     200.218 236.960 293.192  1.00  0.00           H  
ATOM    429  HA2 GLY X  27     198.676 238.578 293.783  1.00  0.00           H  
ATOM    430  HA3 GLY X  27     199.356 239.623 292.436  1.00  0.00           H  
ATOM    431  N   LYS X  28     197.040 239.546 291.544  1.00  0.00           N  
ATOM    432  CA  LYS X  28     195.972 239.620 290.552  1.00  0.00           C  
ATOM    433  C   LYS X  28     196.492 239.150 289.203  1.00  0.00           C  
ATOM    434  O   LYS X  28     197.618 239.371 288.784  1.00  0.00           O  
ATOM    435  CB  LYS X  28     195.258 240.901 290.442  1.00  0.00           C  
ATOM    436  CG  LYS X  28     195.927 242.091 289.830  1.00  0.00           C  
ATOM    437  CD  LYS X  28     195.160 243.401 289.954  1.00  0.00           C  
ATOM    438  CE  LYS X  28     196.105 244.534 289.539  1.00  0.00           C  
ATOM    439  NZ  LYS X  28     195.517 245.854 289.648  1.00  0.00           N1+
ATOM    440  H   LYS X  28     197.376 240.410 291.943  1.00  0.00           H  
ATOM    441  HA  LYS X  28     195.227 238.920 290.932  1.00  0.00           H  
ATOM    442  HB2 LYS X  28     194.485 240.781 289.684  1.00  0.00           H  
ATOM    443  HB3 LYS X  28     194.670 241.081 291.342  1.00  0.00           H  
ATOM    444  HG2 LYS X  28     196.863 242.173 290.383  1.00  0.00           H  
ATOM    445  HG3 LYS X  28     196.093 241.796 288.794  1.00  0.00           H  
ATOM    446  HD2 LYS X  28     194.277 243.458 289.319  1.00  0.00           H  
ATOM    447  HD3 LYS X  28     194.891 243.568 290.997  1.00  0.00           H  
ATOM    448  HE2 LYS X  28     197.009 244.580 290.147  1.00  0.00           H  
ATOM    449  HE3 LYS X  28     196.249 244.221 288.505  1.00  0.00           H  
ATOM    450  HZ1 LYS X  28     195.594 246.073 290.632  1.00  0.00           H  
ATOM    451  HZ2 LYS X  28     194.576 245.875 289.284  1.00  0.00           H  
ATOM    452  HZ3 LYS X  28     196.105 246.514 289.159  1.00  0.00           H  
ATOM    453  N   LEU X  29     195.626 238.498 288.483  1.00  0.00           N  
ATOM    454  CA  LEU X  29     195.834 237.954 287.100  1.00  0.00           C  
ATOM    455  C   LEU X  29     195.664 239.002 286.048  1.00  0.00           C  
ATOM    456  O   LEU X  29     195.050 240.019 286.410  1.00  0.00           O  
ATOM    457  CB  LEU X  29     194.916 236.668 287.070  1.00  0.00           C  
ATOM    458  CG  LEU X  29     195.453 235.533 288.005  1.00  0.00           C  
ATOM    459  CD1 LEU X  29     194.607 234.331 287.948  1.00  0.00           C  
ATOM    460  CD2 LEU X  29     196.951 235.182 287.765  1.00  0.00           C  
ATOM    461  H   LEU X  29     194.694 238.501 288.873  1.00  0.00           H  
ATOM    462  HA  LEU X  29     196.863 237.606 287.012  1.00  0.00           H  
ATOM    463  HB2 LEU X  29     193.901 236.871 287.412  1.00  0.00           H  
ATOM    464  HB3 LEU X  29     194.800 236.211 286.087  1.00  0.00           H  
ATOM    465  HG  LEU X  29     195.339 235.876 289.033  1.00  0.00           H  
ATOM    466 HD11 LEU X  29     195.056 233.487 288.472  1.00  0.00           H  
ATOM    467 HD12 LEU X  29     194.617 234.084 286.887  1.00  0.00           H  
ATOM    468 HD13 LEU X  29     193.573 234.538 288.225  1.00  0.00           H  
ATOM    469 HD21 LEU X  29     197.158 235.141 286.695  1.00  0.00           H  
ATOM    470 HD22 LEU X  29     197.611 235.904 288.246  1.00  0.00           H  
ATOM    471 HD23 LEU X  29     197.144 234.156 288.077  1.00  0.00           H  
ATOM    472  N   PRO X  30     196.033 238.878 284.761  1.00  0.00           N  
ATOM    473  CA  PRO X  30     196.618 237.682 284.187  1.00  0.00           C  
ATOM    474  C   PRO X  30     197.952 237.362 284.852  1.00  0.00           C  
ATOM    475  O   PRO X  30     198.671 238.250 285.342  1.00  0.00           O  
ATOM    476  CB  PRO X  30     196.703 237.975 282.674  1.00  0.00           C  
ATOM    477  CG  PRO X  30     196.804 239.506 282.639  1.00  0.00           C  
ATOM    478  CD  PRO X  30     195.995 239.936 283.825  1.00  0.00           C  
ATOM    479  HA  PRO X  30     195.945 236.824 284.202  1.00  0.00           H  
ATOM    480  HB2 PRO X  30     197.567 237.496 282.214  1.00  0.00           H  
ATOM    481  HB3 PRO X  30     195.769 237.623 282.237  1.00  0.00           H  
ATOM    482  HG2 PRO X  30     197.848 239.770 282.810  1.00  0.00           H  
ATOM    483  HG3 PRO X  30     196.343 239.926 281.745  1.00  0.00           H  
ATOM    484  HD2 PRO X  30     196.536 240.815 284.178  1.00  0.00           H  
ATOM    485  HD3 PRO X  30     194.950 240.200 283.669  1.00  0.00           H  
ATOM    486  N   PRO X  31     198.435 236.117 284.558  1.00  0.00           N  
ATOM    487  CA  PRO X  31     199.898 235.781 284.831  1.00  0.00           C  
ATOM    488  C   PRO X  31     200.883 236.778 284.075  1.00  0.00           C  
ATOM    489  O   PRO X  31     200.724 237.162 282.884  1.00  0.00           O  
ATOM    490  CB  PRO X  31     200.026 234.410 284.170  1.00  0.00           C  
ATOM    491  CG  PRO X  31     198.599 233.793 284.286  1.00  0.00           C  
ATOM    492  CD  PRO X  31     197.692 234.983 284.009  1.00  0.00           C  
ATOM    493  HA  PRO X  31     200.105 235.726 285.900  1.00  0.00           H  
ATOM    494  HB2 PRO X  31     200.193 234.436 283.093  1.00  0.00           H  
ATOM    495  HB3 PRO X  31     200.781 233.824 284.695  1.00  0.00           H  
ATOM    496  HG2 PRO X  31     198.382 233.087 283.485  1.00  0.00           H  
ATOM    497  HG3 PRO X  31     198.377 233.278 285.221  1.00  0.00           H  
ATOM    498  HD2 PRO X  31     197.656 235.187 282.939  1.00  0.00           H  
ATOM    499  HD3 PRO X  31     196.683 234.934 284.417  1.00  0.00           H  
ATOM    500  N   GLY X  32     202.072 236.944 284.699  1.00  0.00           N  
ATOM    501  CA  GLY X  32     203.343 237.364 284.029  1.00  0.00           C  
ATOM    502  C   GLY X  32     203.987 236.107 283.352  1.00  0.00           C  
ATOM    503  O   GLY X  32     204.299 235.188 284.144  1.00  0.00           O  
ATOM    504  H   GLY X  32     202.183 236.510 285.604  1.00  0.00           H  
ATOM    505  HA2 GLY X  32     203.129 238.122 283.275  1.00  0.00           H  
ATOM    506  HA3 GLY X  32     204.058 237.740 284.761  1.00  0.00           H  
ATOM    507  N   PRO X  33     204.184 235.992 282.019  1.00  0.00           N  
ATOM    508  CA  PRO X  33     204.643 234.774 281.411  1.00  0.00           C  
ATOM    509  C   PRO X  33     206.095 234.429 281.597  1.00  0.00           C  
ATOM    510  O   PRO X  33     207.050 235.164 281.248  1.00  0.00           O  
ATOM    511  CB  PRO X  33     204.367 234.931 279.909  1.00  0.00           C  
ATOM    512  CG  PRO X  33     204.358 236.485 279.668  1.00  0.00           C  
ATOM    513  CD  PRO X  33     203.956 237.025 281.008  1.00  0.00           C  
ATOM    514  HA  PRO X  33     203.960 234.024 281.810  1.00  0.00           H  
ATOM    515  HB2 PRO X  33     205.125 234.411 279.323  1.00  0.00           H  
ATOM    516  HB3 PRO X  33     203.399 234.471 279.711  1.00  0.00           H  
ATOM    517  HG2 PRO X  33     205.408 236.690 279.461  1.00  0.00           H  
ATOM    518  HG3 PRO X  33     203.682 236.842 278.891  1.00  0.00           H  
ATOM    519  HD2 PRO X  33     204.501 237.948 281.201  1.00  0.00           H  
ATOM    520  HD3 PRO X  33     202.894 237.257 280.920  1.00  0.00           H  
ATOM    521  N   THR X  34     206.278 233.197 282.005  1.00  0.00           N  
ATOM    522  CA  THR X  34     207.521 232.373 281.939  1.00  0.00           C  
ATOM    523  C   THR X  34     207.701 231.817 280.513  1.00  0.00           C  
ATOM    524  O   THR X  34     206.773 231.140 280.126  1.00  0.00           O  
ATOM    525  CB  THR X  34     207.479 231.227 282.956  1.00  0.00           C  
ATOM    526  CG2 THR X  34     208.461 230.122 282.875  1.00  0.00           C  
ATOM    527  OG1 THR X  34     207.423 231.659 284.303  1.00  0.00           O  
ATOM    528  H   THR X  34     205.415 232.731 282.245  1.00  0.00           H  
ATOM    529  HA  THR X  34     208.355 233.042 282.150  1.00  0.00           H  
ATOM    530  HB  THR X  34     206.565 230.654 282.802  1.00  0.00           H  
ATOM    531  HG1 THR X  34     206.504 231.895 284.446  1.00  0.00           H  
ATOM    532 HG21 THR X  34     208.236 229.379 282.111  1.00  0.00           H  
ATOM    533 HG22 THR X  34     208.528 229.696 283.876  1.00  0.00           H  
ATOM    534 HG23 THR X  34     209.452 230.475 282.590  1.00  0.00           H  
ATOM    535  N   PRO X  35     208.861 231.861 279.820  1.00  0.00           N  
ATOM    536  CA  PRO X  35     209.068 231.429 278.388  1.00  0.00           C  
ATOM    537  C   PRO X  35     209.361 229.918 278.268  1.00  0.00           C  
ATOM    538  O   PRO X  35     209.192 229.418 277.135  1.00  0.00           O  
ATOM    539  CB  PRO X  35     210.217 232.288 277.928  1.00  0.00           C  
ATOM    540  CG  PRO X  35     211.042 232.575 279.167  1.00  0.00           C  
ATOM    541  CD  PRO X  35     209.988 232.710 280.238  1.00  0.00           C  
ATOM    542  HA  PRO X  35     208.194 231.634 277.770  1.00  0.00           H  
ATOM    543  HB2 PRO X  35     210.807 231.785 277.161  1.00  0.00           H  
ATOM    544  HB3 PRO X  35     209.930 233.262 277.533  1.00  0.00           H  
ATOM    545  HG2 PRO X  35     211.634 231.687 279.390  1.00  0.00           H  
ATOM    546  HG3 PRO X  35     211.541 233.532 279.019  1.00  0.00           H  
ATOM    547  HD2 PRO X  35     210.519 232.406 281.140  1.00  0.00           H  
ATOM    548  HD3 PRO X  35     209.681 233.743 280.074  1.00  0.00           H  
ATOM    549  N   LEU X  36     209.809 229.328 279.345  1.00  0.00           N  
ATOM    550  CA  LEU X  36     210.347 227.939 279.420  1.00  0.00           C  
ATOM    551  C   LEU X  36     210.319 227.524 280.868  1.00  0.00           C  
ATOM    552  O   LEU X  36     210.787 228.312 281.704  1.00  0.00           O  
ATOM    553  CB  LEU X  36     211.798 228.073 278.844  1.00  0.00           C  
ATOM    554  CG  LEU X  36     212.390 226.683 278.490  1.00  0.00           C  
ATOM    555  CD1 LEU X  36     211.723 225.946 277.360  1.00  0.00           C  
ATOM    556  CD2 LEU X  36     213.809 226.893 278.200  1.00  0.00           C  
ATOM    557  H   LEU X  36     209.981 229.843 280.197  1.00  0.00           H  
ATOM    558  HA  LEU X  36     209.699 227.384 278.741  1.00  0.00           H  
ATOM    559  HB2 LEU X  36     211.750 228.555 277.867  1.00  0.00           H  
ATOM    560  HB3 LEU X  36     212.303 228.743 279.540  1.00  0.00           H  
ATOM    561  HG  LEU X  36     212.185 226.184 279.437  1.00  0.00           H  
ATOM    562 HD11 LEU X  36     211.647 226.709 276.585  1.00  0.00           H  
ATOM    563 HD12 LEU X  36     210.700 225.639 277.574  1.00  0.00           H  
ATOM    564 HD13 LEU X  36     212.308 225.161 276.880  1.00  0.00           H  
ATOM    565 HD21 LEU X  36     214.260 225.936 277.935  1.00  0.00           H  
ATOM    566 HD22 LEU X  36     213.878 227.655 277.425  1.00  0.00           H  
ATOM    567 HD23 LEU X  36     214.293 227.344 279.066  1.00  0.00           H  
ATOM    568  N   PRO X  37     209.843 226.379 281.302  1.00  0.00           N  
ATOM    569  CA  PRO X  37     209.512 225.989 282.697  1.00  0.00           C  
ATOM    570  C   PRO X  37     210.714 225.548 283.552  1.00  0.00           C  
ATOM    571  O   PRO X  37     210.445 225.355 284.765  1.00  0.00           O  
ATOM    572  CB  PRO X  37     208.343 224.958 282.583  1.00  0.00           C  
ATOM    573  CG  PRO X  37     208.429 224.411 281.172  1.00  0.00           C  
ATOM    574  CD  PRO X  37     209.039 225.551 280.426  1.00  0.00           C  
ATOM    575  HA  PRO X  37     209.093 226.851 283.217  1.00  0.00           H  
ATOM    576  HB2 PRO X  37     208.419 224.159 283.320  1.00  0.00           H  
ATOM    577  HB3 PRO X  37     207.399 225.491 282.694  1.00  0.00           H  
ATOM    578  HG2 PRO X  37     209.169 223.621 281.043  1.00  0.00           H  
ATOM    579  HG3 PRO X  37     207.466 224.117 280.754  1.00  0.00           H  
ATOM    580  HD2 PRO X  37     209.697 225.184 279.638  1.00  0.00           H  
ATOM    581  HD3 PRO X  37     208.304 226.156 279.895  1.00  0.00           H  
ATOM    582  N   VAL X  38     211.907 225.530 282.967  1.00  0.00           N  
ATOM    583  CA  VAL X  38     213.145 225.052 283.609  1.00  0.00           C  
ATOM    584  C   VAL X  38     213.585 225.913 284.850  1.00  0.00           C  
ATOM    585  O   VAL X  38     214.189 225.350 285.735  1.00  0.00           O  
ATOM    586  CB  VAL X  38     214.266 224.964 282.604  1.00  0.00           C  
ATOM    587  CG1 VAL X  38     213.841 224.189 281.324  1.00  0.00           C  
ATOM    588  CG2 VAL X  38     214.718 226.395 282.198  1.00  0.00           C  
ATOM    589  H   VAL X  38     211.918 225.643 281.964  1.00  0.00           H  
ATOM    590  HA  VAL X  38     212.936 224.019 283.888  1.00  0.00           H  
ATOM    591  HB  VAL X  38     215.051 224.358 283.057  1.00  0.00           H  
ATOM    592 HG11 VAL X  38     213.372 224.865 280.609  1.00  0.00           H  
ATOM    593 HG12 VAL X  38     214.733 223.742 280.886  1.00  0.00           H  
ATOM    594 HG13 VAL X  38     213.135 223.412 281.617  1.00  0.00           H  
ATOM    595 HG21 VAL X  38     215.307 226.371 281.281  1.00  0.00           H  
ATOM    596 HG22 VAL X  38     215.267 226.878 283.006  1.00  0.00           H  
ATOM    597 HG23 VAL X  38     213.913 227.076 281.922  1.00  0.00           H  
ATOM    598  N   ILE X  39     213.159 227.160 284.875  1.00  0.00           N  
ATOM    599  CA  ILE X  39     213.485 228.173 285.918  1.00  0.00           C  
ATOM    600  C   ILE X  39     212.480 227.983 287.114  1.00  0.00           C  
ATOM    601  O   ILE X  39     212.742 228.601 288.181  1.00  0.00           O  
ATOM    602  CB  ILE X  39     213.408 229.623 285.325  1.00  0.00           C  
ATOM    603  CG1 ILE X  39     211.957 230.139 285.014  1.00  0.00           C  
ATOM    604  CG2 ILE X  39     214.288 229.776 284.017  1.00  0.00           C  
ATOM    605  CD1 ILE X  39     211.931 231.592 284.465  1.00  0.00           C  
ATOM    606  H   ILE X  39     212.523 227.439 284.142  1.00  0.00           H  
ATOM    607  HA  ILE X  39     214.485 227.943 286.283  1.00  0.00           H  
ATOM    608  HB  ILE X  39     213.844 230.283 286.074  1.00  0.00           H  
ATOM    609 HG12 ILE X  39     211.506 229.485 284.267  1.00  0.00           H  
ATOM    610 HG13 ILE X  39     211.215 230.171 285.812  1.00  0.00           H  
ATOM    611 HG21 ILE X  39     215.317 229.489 284.235  1.00  0.00           H  
ATOM    612 HG22 ILE X  39     214.383 230.774 283.587  1.00  0.00           H  
ATOM    613 HG23 ILE X  39     213.913 229.048 283.298  1.00  0.00           H  
ATOM    614 HD11 ILE X  39     211.062 232.098 284.886  1.00  0.00           H  
ATOM    615 HD12 ILE X  39     211.999 231.583 283.377  1.00  0.00           H  
ATOM    616 HD13 ILE X  39     212.833 232.101 284.804  1.00  0.00           H  
ATOM    617  N   GLY X  40     211.482 227.127 286.975  1.00  0.00           N  
ATOM    618  CA  GLY X  40     210.713 226.783 288.175  1.00  0.00           C  
ATOM    619  C   GLY X  40     209.704 227.814 288.523  1.00  0.00           C  
ATOM    620  O   GLY X  40     209.035 228.338 287.630  1.00  0.00           O  
ATOM    621  H   GLY X  40     211.304 226.664 286.095  1.00  0.00           H  
ATOM    622  HA2 GLY X  40     210.162 225.859 288.000  1.00  0.00           H  
ATOM    623  HA3 GLY X  40     211.321 226.494 289.032  1.00  0.00           H  
ATOM    624  N   ASN X  41     209.614 228.068 289.835  1.00  0.00           N  
ATOM    625  CA  ASN X  41     208.652 228.999 290.436  1.00  0.00           C  
ATOM    626  C   ASN X  41     209.073 230.510 290.403  1.00  0.00           C  
ATOM    627  O   ASN X  41     208.279 231.324 290.870  1.00  0.00           O  
ATOM    628  CB  ASN X  41     208.318 228.524 291.849  1.00  0.00           C  
ATOM    629  CG  ASN X  41     207.683 227.170 292.092  1.00  0.00           C  
ATOM    630  ND2 ASN X  41     206.566 226.796 291.382  1.00  0.00           N  
ATOM    631  OD1 ASN X  41     208.152 226.296 292.866  1.00  0.00           O  
ATOM    632  H   ASN X  41     210.136 227.496 290.483  1.00  0.00           H  
ATOM    633  HA  ASN X  41     207.764 228.949 289.806  1.00  0.00           H  
ATOM    634  HB2 ASN X  41     209.094 228.614 292.609  1.00  0.00           H  
ATOM    635  HB3 ASN X  41     207.600 229.308 292.089  1.00  0.00           H  
ATOM    636 HD21 ASN X  41     206.120 227.516 290.833  1.00  0.00           H  
ATOM    637 HD22 ASN X  41     206.185 225.868 291.501  1.00  0.00           H  
ATOM    638  N   ILE X  42     210.201 230.899 289.799  1.00  0.00           N  
ATOM    639  CA  ILE X  42     210.950 232.192 290.166  1.00  0.00           C  
ATOM    640  C   ILE X  42     210.261 233.459 289.761  1.00  0.00           C  
ATOM    641  O   ILE X  42     210.513 234.466 290.327  1.00  0.00           O  
ATOM    642  CB  ILE X  42     212.284 232.121 289.495  1.00  0.00           C  
ATOM    643  CG1 ILE X  42     213.312 233.103 290.120  1.00  0.00           C  
ATOM    644  CG2 ILE X  42     212.211 232.203 287.963  1.00  0.00           C  
ATOM    645  CD1 ILE X  42     214.690 232.526 289.844  1.00  0.00           C  
ATOM    646  H   ILE X  42     210.719 230.195 289.293  1.00  0.00           H  
ATOM    647  HA  ILE X  42     211.012 232.220 291.254  1.00  0.00           H  
ATOM    648  HB  ILE X  42     212.600 231.125 289.807  1.00  0.00           H  
ATOM    649 HG12 ILE X  42     213.073 234.024 289.589  1.00  0.00           H  
ATOM    650 HG13 ILE X  42     213.090 233.233 291.179  1.00  0.00           H  
ATOM    651 HG21 ILE X  42     212.062 233.235 287.646  1.00  0.00           H  
ATOM    652 HG22 ILE X  42     211.472 231.475 287.627  1.00  0.00           H  
ATOM    653 HG23 ILE X  42     213.222 231.960 287.634  1.00  0.00           H  
ATOM    654 HD11 ILE X  42     214.906 232.698 288.790  1.00  0.00           H  
ATOM    655 HD12 ILE X  42     214.711 231.444 289.974  1.00  0.00           H  
ATOM    656 HD13 ILE X  42     215.498 233.086 290.315  1.00  0.00           H  
ATOM    657  N   LEU X  43     209.381 233.361 288.770  1.00  0.00           N  
ATOM    658  CA  LEU X  43     208.520 234.414 288.175  1.00  0.00           C  
ATOM    659  C   LEU X  43     207.031 234.247 288.578  1.00  0.00           C  
ATOM    660  O   LEU X  43     206.269 235.266 288.684  1.00  0.00           O  
ATOM    661  CB  LEU X  43     208.799 234.439 286.652  1.00  0.00           C  
ATOM    662  CG  LEU X  43     207.895 235.415 285.830  1.00  0.00           C  
ATOM    663  CD1 LEU X  43     207.889 236.918 286.238  1.00  0.00           C  
ATOM    664  CD2 LEU X  43     208.328 235.363 284.352  1.00  0.00           C  
ATOM    665  H   LEU X  43     209.282 232.455 288.333  1.00  0.00           H  
ATOM    666  HA  LEU X  43     208.793 235.380 288.599  1.00  0.00           H  
ATOM    667  HB2 LEU X  43     209.868 234.622 286.539  1.00  0.00           H  
ATOM    668  HB3 LEU X  43     208.509 233.446 286.310  1.00  0.00           H  
ATOM    669  HG  LEU X  43     206.892 234.988 285.813  1.00  0.00           H  
ATOM    670 HD11 LEU X  43     208.815 237.456 286.033  1.00  0.00           H  
ATOM    671 HD12 LEU X  43     207.546 237.095 287.257  1.00  0.00           H  
ATOM    672 HD13 LEU X  43     207.158 237.381 285.575  1.00  0.00           H  
ATOM    673 HD21 LEU X  43     207.820 236.109 283.741  1.00  0.00           H  
ATOM    674 HD22 LEU X  43     209.407 235.488 284.264  1.00  0.00           H  
ATOM    675 HD23 LEU X  43     207.992 234.422 283.917  1.00  0.00           H  
ATOM    676  N   GLN X  44     206.631 233.006 288.944  1.00  0.00           N  
ATOM    677  CA  GLN X  44     205.296 232.667 289.492  1.00  0.00           C  
ATOM    678  C   GLN X  44     204.969 232.981 290.929  1.00  0.00           C  
ATOM    679  O   GLN X  44     203.847 233.035 291.356  1.00  0.00           O  
ATOM    680  CB  GLN X  44     205.172 231.158 289.330  1.00  0.00           C  
ATOM    681  CG  GLN X  44     203.787 230.512 289.486  1.00  0.00           C  
ATOM    682  CD  GLN X  44     204.044 229.017 289.731  1.00  0.00           C  
ATOM    683  NE2 GLN X  44     203.017 228.269 290.032  1.00  0.00           N  
ATOM    684  OE1 GLN X  44     205.153 228.475 289.572  1.00  0.00           O  
ATOM    685  H   GLN X  44     207.288 232.242 288.878  1.00  0.00           H  
ATOM    686  HA  GLN X  44     204.575 233.176 288.852  1.00  0.00           H  
ATOM    687  HB2 GLN X  44     205.537 230.911 288.334  1.00  0.00           H  
ATOM    688  HB3 GLN X  44     205.799 230.724 290.110  1.00  0.00           H  
ATOM    689  HG2 GLN X  44     203.216 230.813 290.364  1.00  0.00           H  
ATOM    690  HG3 GLN X  44     203.144 230.615 288.611  1.00  0.00           H  
ATOM    691 HE21 GLN X  44     203.190 227.279 290.136  1.00  0.00           H  
ATOM    692 HE22 GLN X  44     202.099 228.650 290.213  1.00  0.00           H  
ATOM    693  N   ILE X  45     205.989 232.982 291.794  1.00  0.00           N  
ATOM    694  CA  ILE X  45     205.874 233.172 293.298  1.00  0.00           C  
ATOM    695  C   ILE X  45     206.803 234.385 293.668  1.00  0.00           C  
ATOM    696  O   ILE X  45     208.009 234.491 293.333  1.00  0.00           O  
ATOM    697  CB  ILE X  45     206.321 231.850 293.974  1.00  0.00           C  
ATOM    698  CG1 ILE X  45     205.460 230.629 293.482  1.00  0.00           C  
ATOM    699  CG2 ILE X  45     206.163 232.043 295.495  1.00  0.00           C  
ATOM    700  CD1 ILE X  45     205.689 229.258 294.165  1.00  0.00           C  
ATOM    701  H   ILE X  45     206.860 232.613 291.438  1.00  0.00           H  
ATOM    702  HA  ILE X  45     204.862 233.396 293.635  1.00  0.00           H  
ATOM    703  HB  ILE X  45     207.375 231.670 293.765  1.00  0.00           H  
ATOM    704 HG12 ILE X  45     204.414 230.925 293.559  1.00  0.00           H  
ATOM    705 HG13 ILE X  45     205.561 230.406 292.420  1.00  0.00           H  
ATOM    706 HG21 ILE X  45     206.647 231.276 296.100  1.00  0.00           H  
ATOM    707 HG22 ILE X  45     205.113 232.229 295.722  1.00  0.00           H  
ATOM    708 HG23 ILE X  45     206.741 232.941 295.712  1.00  0.00           H  
ATOM    709 HD11 ILE X  45     206.723 228.928 294.260  1.00  0.00           H  
ATOM    710 HD12 ILE X  45     205.193 228.410 293.692  1.00  0.00           H  
ATOM    711 HD13 ILE X  45     205.323 229.334 295.189  1.00  0.00           H  
ATOM    712  N   GLY X  46     206.341 235.416 294.461  1.00  0.00           N  
ATOM    713  CA  GLY X  46     207.234 236.382 295.078  1.00  0.00           C  
ATOM    714  C   GLY X  46     208.089 235.683 296.087  1.00  0.00           C  
ATOM    715  O   GLY X  46     207.574 234.967 296.925  1.00  0.00           O  
ATOM    716  H   GLY X  46     205.394 235.409 294.811  1.00  0.00           H  
ATOM    717  HA2 GLY X  46     207.807 236.837 294.270  1.00  0.00           H  
ATOM    718  HA3 GLY X  46     206.597 237.139 295.537  1.00  0.00           H  
ATOM    719  N   ILE X  47     209.413 235.934 296.144  1.00  0.00           N  
ATOM    720  CA  ILE X  47     210.336 235.271 297.081  1.00  0.00           C  
ATOM    721  C   ILE X  47     210.028 235.391 298.630  1.00  0.00           C  
ATOM    722  O   ILE X  47     210.592 234.670 299.503  1.00  0.00           O  
ATOM    723  CB  ILE X  47     211.860 235.787 296.810  1.00  0.00           C  
ATOM    724  CG1 ILE X  47     213.000 234.935 297.364  1.00  0.00           C  
ATOM    725  CG2 ILE X  47     212.059 237.238 297.242  1.00  0.00           C  
ATOM    726  CD1 ILE X  47     212.907 233.435 296.872  1.00  0.00           C  
ATOM    727  H   ILE X  47     209.852 236.412 295.369  1.00  0.00           H  
ATOM    728  HA  ILE X  47     210.330 234.222 296.784  1.00  0.00           H  
ATOM    729  HB  ILE X  47     211.911 235.694 295.725  1.00  0.00           H  
ATOM    730 HG12 ILE X  47     213.943 235.290 296.948  1.00  0.00           H  
ATOM    731 HG13 ILE X  47     213.163 234.942 298.442  1.00  0.00           H  
ATOM    732 HG21 ILE X  47     212.236 237.357 298.311  1.00  0.00           H  
ATOM    733 HG22 ILE X  47     211.196 237.859 297.002  1.00  0.00           H  
ATOM    734 HG23 ILE X  47     212.945 237.584 296.710  1.00  0.00           H  
ATOM    735 HD11 ILE X  47     212.066 232.971 297.387  1.00  0.00           H  
ATOM    736 HD12 ILE X  47     213.818 232.937 297.207  1.00  0.00           H  
ATOM    737 HD13 ILE X  47     212.693 233.408 295.804  1.00  0.00           H  
ATOM    738  N   LYS X  48     209.175 236.349 299.077  1.00  0.00           N  
ATOM    739  CA  LYS X  48     208.829 236.608 300.505  1.00  0.00           C  
ATOM    740  C   LYS X  48     207.322 236.622 300.608  1.00  0.00           C  
ATOM    741  O   LYS X  48     206.802 236.134 301.609  1.00  0.00           O  
ATOM    742  CB  LYS X  48     209.736 237.781 301.055  1.00  0.00           C  
ATOM    743  CG  LYS X  48     209.473 239.164 300.475  1.00  0.00           C  
ATOM    744  CD  LYS X  48     208.136 239.871 300.737  1.00  0.00           C  
ATOM    745  CE  LYS X  48     208.239 241.302 300.275  1.00  0.00           C  
ATOM    746  NZ  LYS X  48     207.158 242.135 300.800  1.00  0.00           N1+
ATOM    747  H   LYS X  48     208.686 236.988 298.466  1.00  0.00           H  
ATOM    748  HA  LYS X  48     209.084 235.739 301.111  1.00  0.00           H  
ATOM    749  HB2 LYS X  48     209.581 237.840 302.133  1.00  0.00           H  
ATOM    750  HB3 LYS X  48     210.772 237.581 300.784  1.00  0.00           H  
ATOM    751  HG2 LYS X  48     210.239 239.754 300.978  1.00  0.00           H  
ATOM    752  HG3 LYS X  48     209.590 239.085 299.394  1.00  0.00           H  
ATOM    753  HD2 LYS X  48     207.320 239.381 300.206  1.00  0.00           H  
ATOM    754  HD3 LYS X  48     208.032 239.697 301.808  1.00  0.00           H  
ATOM    755  HE2 LYS X  48     209.201 241.757 300.512  1.00  0.00           H  
ATOM    756  HE3 LYS X  48     208.021 241.291 299.208  1.00  0.00           H  
ATOM    757  HZ1 LYS X  48     207.429 243.076 300.555  1.00  0.00           H  
ATOM    758  HZ2 LYS X  48     207.080 241.992 301.797  1.00  0.00           H  
ATOM    759  HZ3 LYS X  48     206.246 241.916 300.425  1.00  0.00           H  
ATOM    760  N   ASP X  49     206.526 236.773 299.512  1.00  0.00           N  
ATOM    761  CA  ASP X  49     205.099 236.530 299.370  1.00  0.00           C  
ATOM    762  C   ASP X  49     204.802 234.974 299.430  1.00  0.00           C  
ATOM    763  O   ASP X  49     203.689 234.608 299.197  1.00  0.00           O  
ATOM    764  CB  ASP X  49     204.761 237.174 298.054  1.00  0.00           C  
ATOM    765  CG  ASP X  49     204.522 238.676 297.954  1.00  0.00           C  
ATOM    766  OD1 ASP X  49     205.179 239.279 297.049  1.00  0.00           O  
ATOM    767  OD2 ASP X  49     203.807 239.242 298.784  1.00  0.00           O1-
ATOM    768  H   ASP X  49     206.975 237.212 298.721  1.00  0.00           H  
ATOM    769  HA  ASP X  49     204.498 237.065 300.105  1.00  0.00           H  
ATOM    770  HB2 ASP X  49     205.499 236.872 297.311  1.00  0.00           H  
ATOM    771  HB3 ASP X  49     203.810 236.705 297.802  1.00  0.00           H  
ATOM    772  N   ILE X  50     205.684 234.074 299.850  1.00  0.00           N  
ATOM    773  CA  ILE X  50     205.587 232.671 299.676  1.00  0.00           C  
ATOM    774  C   ILE X  50     204.540 231.912 300.442  1.00  0.00           C  
ATOM    775  O   ILE X  50     204.137 230.792 300.112  1.00  0.00           O  
ATOM    776  CB  ILE X  50     206.965 232.012 300.015  1.00  0.00           C  
ATOM    777  CG1 ILE X  50     207.420 232.318 301.457  1.00  0.00           C  
ATOM    778  CG2 ILE X  50     208.050 232.479 299.026  1.00  0.00           C  
ATOM    779  CD1 ILE X  50     208.519 231.334 301.896  1.00  0.00           C  
ATOM    780  H   ILE X  50     206.569 234.442 300.168  1.00  0.00           H  
ATOM    781  HA  ILE X  50     205.412 232.533 298.609  1.00  0.00           H  
ATOM    782  HB  ILE X  50     206.851 230.933 299.915  1.00  0.00           H  
ATOM    783 HG12 ILE X  50     207.734 233.353 301.595  1.00  0.00           H  
ATOM    784 HG13 ILE X  50     206.549 232.080 302.068  1.00  0.00           H  
ATOM    785 HG21 ILE X  50     208.978 231.906 299.008  1.00  0.00           H  
ATOM    786 HG22 ILE X  50     208.358 233.500 299.251  1.00  0.00           H  
ATOM    787 HG23 ILE X  50     207.707 232.389 297.995  1.00  0.00           H  
ATOM    788 HD11 ILE X  50     209.319 231.198 301.169  1.00  0.00           H  
ATOM    789 HD12 ILE X  50     208.049 230.350 301.873  1.00  0.00           H  
ATOM    790 HD13 ILE X  50     208.991 231.596 302.843  1.00  0.00           H  
ATOM    791  N   SER X  51     203.932 232.564 301.438  1.00  0.00           N  
ATOM    792  CA  SER X  51     202.701 232.184 302.168  1.00  0.00           C  
ATOM    793  C   SER X  51     201.500 232.334 301.249  1.00  0.00           C  
ATOM    794  O   SER X  51     200.506 231.567 301.332  1.00  0.00           O  
ATOM    795  CB  SER X  51     202.598 232.972 303.482  1.00  0.00           C  
ATOM    796  OG  SER X  51     201.372 232.705 304.303  1.00  0.00           O  
ATOM    797  H   SER X  51     204.320 233.424 301.798  1.00  0.00           H  
ATOM    798  HA  SER X  51     202.733 231.113 302.371  1.00  0.00           H  
ATOM    799  HB2 SER X  51     203.458 232.684 304.087  1.00  0.00           H  
ATOM    800  HB3 SER X  51     202.609 234.048 303.312  1.00  0.00           H  
ATOM    801  HG  SER X  51     201.259 233.341 305.013  1.00  0.00           H  
ATOM    802  N   LYS X  52     201.497 233.319 300.347  1.00  0.00           N  
ATOM    803  CA  LYS X  52     200.413 233.707 299.504  1.00  0.00           C  
ATOM    804  C   LYS X  52     200.104 232.555 298.482  1.00  0.00           C  
ATOM    805  O   LYS X  52     198.957 232.176 298.311  1.00  0.00           O  
ATOM    806  CB  LYS X  52     200.595 235.126 298.849  1.00  0.00           C  
ATOM    807  CG  LYS X  52     200.650 236.221 299.949  1.00  0.00           C  
ATOM    808  CD  LYS X  52     200.755 237.642 299.385  1.00  0.00           C  
ATOM    809  CE  LYS X  52     201.001 238.613 300.577  1.00  0.00           C  
ATOM    810  NZ  LYS X  52     201.217 239.998 300.074  1.00  0.00           N1+
ATOM    811  H   LYS X  52     202.286 233.945 300.272  1.00  0.00           H  
ATOM    812  HA  LYS X  52     199.546 233.854 300.149  1.00  0.00           H  
ATOM    813  HB2 LYS X  52     201.410 235.021 298.133  1.00  0.00           H  
ATOM    814  HB3 LYS X  52     199.679 235.354 298.305  1.00  0.00           H  
ATOM    815  HG2 LYS X  52     199.743 236.254 300.553  1.00  0.00           H  
ATOM    816  HG3 LYS X  52     201.568 236.058 300.514  1.00  0.00           H  
ATOM    817  HD2 LYS X  52     201.571 237.616 298.663  1.00  0.00           H  
ATOM    818  HD3 LYS X  52     199.777 237.821 298.939  1.00  0.00           H  
ATOM    819  HE2 LYS X  52     200.205 238.645 301.320  1.00  0.00           H  
ATOM    820  HE3 LYS X  52     201.900 238.347 301.134  1.00  0.00           H  
ATOM    821  HZ1 LYS X  52     202.031 240.072 299.481  1.00  0.00           H  
ATOM    822  HZ2 LYS X  52     201.289 240.733 300.763  1.00  0.00           H  
ATOM    823  HZ3 LYS X  52     200.365 240.302 299.624  1.00  0.00           H  
ATOM    824  N   SER X  53     201.278 232.019 298.057  1.00  0.00           N  
ATOM    825  CA  SER X  53     201.263 230.861 297.086  1.00  0.00           C  
ATOM    826  C   SER X  53     201.090 229.606 297.883  1.00  0.00           C  
ATOM    827  O   SER X  53     200.117 228.928 297.609  1.00  0.00           O  
ATOM    828  CB  SER X  53     202.442 230.834 296.230  1.00  0.00           C  
ATOM    829  OG  SER X  53     202.213 229.823 295.210  1.00  0.00           O  
ATOM    830  H   SER X  53     202.133 232.419 298.417  1.00  0.00           H  
ATOM    831  HA  SER X  53     200.422 230.844 296.393  1.00  0.00           H  
ATOM    832  HB2 SER X  53     202.546 231.774 295.688  1.00  0.00           H  
ATOM    833  HB3 SER X  53     203.275 230.420 296.798  1.00  0.00           H  
ATOM    834  HG  SER X  53     201.976 230.397 294.479  1.00  0.00           H  
ATOM    835  N   LEU X  54     201.904 229.341 298.929  1.00  0.00           N  
ATOM    836  CA  LEU X  54     201.684 228.114 299.787  1.00  0.00           C  
ATOM    837  C   LEU X  54     200.211 227.917 300.234  1.00  0.00           C  
ATOM    838  O   LEU X  54     199.679 226.804 300.089  1.00  0.00           O  
ATOM    839  CB  LEU X  54     202.755 228.054 300.906  1.00  0.00           C  
ATOM    840  CG  LEU X  54     202.746 226.984 301.993  1.00  0.00           C  
ATOM    841  CD1 LEU X  54     202.792 225.577 301.405  1.00  0.00           C  
ATOM    842  CD2 LEU X  54     203.962 227.136 302.987  1.00  0.00           C  
ATOM    843  H   LEU X  54     202.740 229.861 299.154  1.00  0.00           H  
ATOM    844  HA  LEU X  54     201.805 227.242 299.144  1.00  0.00           H  
ATOM    845  HB2 LEU X  54     203.723 228.003 300.408  1.00  0.00           H  
ATOM    846  HB3 LEU X  54     202.700 229.011 301.425  1.00  0.00           H  
ATOM    847  HG  LEU X  54     201.831 227.167 302.556  1.00  0.00           H  
ATOM    848 HD11 LEU X  54     201.929 225.532 300.741  1.00  0.00           H  
ATOM    849 HD12 LEU X  54     202.467 224.871 302.169  1.00  0.00           H  
ATOM    850 HD13 LEU X  54     203.733 225.461 300.867  1.00  0.00           H  
ATOM    851 HD21 LEU X  54     203.839 227.978 303.669  1.00  0.00           H  
ATOM    852 HD22 LEU X  54     204.070 226.248 303.609  1.00  0.00           H  
ATOM    853 HD23 LEU X  54     204.859 227.302 302.390  1.00  0.00           H  
ATOM    854  N   THR X  55     199.495 228.953 300.559  1.00  0.00           N  
ATOM    855  CA  THR X  55     198.066 228.996 300.834  1.00  0.00           C  
ATOM    856  C   THR X  55     197.132 228.612 299.703  1.00  0.00           C  
ATOM    857  O   THR X  55     196.242 227.837 299.924  1.00  0.00           O  
ATOM    858  CB  THR X  55     197.614 230.384 301.380  1.00  0.00           C  
ATOM    859  CG2 THR X  55     196.126 230.280 301.721  1.00  0.00           C  
ATOM    860  OG1 THR X  55     198.356 230.679 302.629  1.00  0.00           O  
ATOM    861  H   THR X  55     199.866 229.887 300.660  1.00  0.00           H  
ATOM    862  HA  THR X  55     198.032 228.196 301.574  1.00  0.00           H  
ATOM    863  HB  THR X  55     197.824 231.108 300.593  1.00  0.00           H  
ATOM    864  HG1 THR X  55     199.160 231.045 302.252  1.00  0.00           H  
ATOM    865 HG21 THR X  55     195.609 230.038 300.793  1.00  0.00           H  
ATOM    866 HG22 THR X  55     195.741 231.196 302.169  1.00  0.00           H  
ATOM    867 HG23 THR X  55     195.920 229.503 302.458  1.00  0.00           H  
ATOM    868  N   ASN X  56     197.548 228.993 298.485  1.00  0.00           N  
ATOM    869  CA  ASN X  56     196.858 228.470 297.221  1.00  0.00           C  
ATOM    870  C   ASN X  56     197.248 227.076 296.920  1.00  0.00           C  
ATOM    871  O   ASN X  56     196.452 226.309 296.417  1.00  0.00           O  
ATOM    872  CB  ASN X  56     197.236 229.430 296.057  1.00  0.00           C  
ATOM    873  CG  ASN X  56     196.382 229.046 294.891  1.00  0.00           C  
ATOM    874  ND2 ASN X  56     195.121 229.431 294.935  1.00  0.00           N  
ATOM    875  OD1 ASN X  56     196.865 228.517 293.962  1.00  0.00           O  
ATOM    876  H   ASN X  56     198.281 229.678 298.368  1.00  0.00           H  
ATOM    877  HA  ASN X  56     195.798 228.360 297.448  1.00  0.00           H  
ATOM    878  HB2 ASN X  56     197.080 230.440 296.435  1.00  0.00           H  
ATOM    879  HB3 ASN X  56     198.304 229.349 295.854  1.00  0.00           H  
ATOM    880 HD21 ASN X  56     194.734 229.821 295.782  1.00  0.00           H  
ATOM    881 HD22 ASN X  56     194.384 229.248 294.269  1.00  0.00           H  
ATOM    882  N   LEU X  57     198.478 226.714 297.115  1.00  0.00           N  
ATOM    883  CA  LEU X  57     198.933 225.412 296.655  1.00  0.00           C  
ATOM    884  C   LEU X  57     198.348 224.264 297.569  1.00  0.00           C  
ATOM    885  O   LEU X  57     198.290 223.174 297.048  1.00  0.00           O  
ATOM    886  CB  LEU X  57     200.490 225.416 296.810  1.00  0.00           C  
ATOM    887  CG  LEU X  57     201.242 226.283 295.806  1.00  0.00           C  
ATOM    888  CD1 LEU X  57     202.732 226.229 296.157  1.00  0.00           C  
ATOM    889  CD2 LEU X  57     201.134 225.846 294.266  1.00  0.00           C  
ATOM    890  H   LEU X  57     199.166 227.270 297.601  1.00  0.00           H  
ATOM    891  HA  LEU X  57     198.632 225.154 295.640  1.00  0.00           H  
ATOM    892  HB2 LEU X  57     200.792 225.853 297.761  1.00  0.00           H  
ATOM    893  HB3 LEU X  57     200.918 224.417 296.740  1.00  0.00           H  
ATOM    894  HG  LEU X  57     200.952 227.332 295.873  1.00  0.00           H  
ATOM    895 HD11 LEU X  57     203.086 225.217 295.959  1.00  0.00           H  
ATOM    896 HD12 LEU X  57     202.832 226.564 297.189  1.00  0.00           H  
ATOM    897 HD13 LEU X  57     203.235 226.997 295.569  1.00  0.00           H  
ATOM    898 HD21 LEU X  57     201.782 226.466 293.645  1.00  0.00           H  
ATOM    899 HD22 LEU X  57     201.352 224.794 294.079  1.00  0.00           H  
ATOM    900 HD23 LEU X  57     200.103 226.007 293.953  1.00  0.00           H  
ATOM    901  N   SER X  58     197.802 224.586 298.676  1.00  0.00           N  
ATOM    902  CA  SER X  58     197.031 223.628 299.421  1.00  0.00           C  
ATOM    903  C   SER X  58     195.923 222.932 298.613  1.00  0.00           C  
ATOM    904  O   SER X  58     195.583 221.740 298.887  1.00  0.00           O  
ATOM    905  CB  SER X  58     196.434 224.311 300.618  1.00  0.00           C  
ATOM    906  OG  SER X  58     195.427 225.297 300.134  1.00  0.00           O  
ATOM    907  H   SER X  58     198.081 225.396 299.210  1.00  0.00           H  
ATOM    908  HA  SER X  58     197.776 222.960 299.854  1.00  0.00           H  
ATOM    909  HB2 SER X  58     195.972 223.618 301.321  1.00  0.00           H  
ATOM    910  HB3 SER X  58     197.236 224.842 301.132  1.00  0.00           H  
ATOM    911  HG  SER X  58     195.855 226.119 299.883  1.00  0.00           H  
ATOM    912  N   LYS X  59     195.265 223.560 297.599  1.00  0.00           N  
ATOM    913  CA  LYS X  59     194.222 222.973 296.690  1.00  0.00           C  
ATOM    914  C   LYS X  59     194.821 221.791 295.850  1.00  0.00           C  
ATOM    915  O   LYS X  59     193.972 221.055 295.390  1.00  0.00           O  
ATOM    916  CB  LYS X  59     193.628 224.060 295.705  1.00  0.00           C  
ATOM    917  CG  LYS X  59     192.948 225.131 296.601  1.00  0.00           C  
ATOM    918  CD  LYS X  59     192.142 226.077 295.751  1.00  0.00           C  
ATOM    919  CE  LYS X  59     191.363 227.182 296.457  1.00  0.00           C  
ATOM    920  NZ  LYS X  59     190.394 226.547 297.354  1.00  0.00           N1+
ATOM    921  H   LYS X  59     195.343 224.562 297.502  1.00  0.00           H  
ATOM    922  HA  LYS X  59     193.375 222.548 297.229  1.00  0.00           H  
ATOM    923  HB2 LYS X  59     194.396 224.444 295.034  1.00  0.00           H  
ATOM    924  HB3 LYS X  59     192.830 223.594 295.127  1.00  0.00           H  
ATOM    925  HG2 LYS X  59     192.266 224.566 297.236  1.00  0.00           H  
ATOM    926  HG3 LYS X  59     193.659 225.671 297.227  1.00  0.00           H  
ATOM    927  HD2 LYS X  59     192.772 226.568 295.009  1.00  0.00           H  
ATOM    928  HD3 LYS X  59     191.461 225.433 295.196  1.00  0.00           H  
ATOM    929  HE2 LYS X  59     192.068 227.833 296.976  1.00  0.00           H  
ATOM    930  HE3 LYS X  59     190.875 227.855 295.752  1.00  0.00           H  
ATOM    931  HZ1 LYS X  59     190.015 227.223 298.003  1.00  0.00           H  
ATOM    932  HZ2 LYS X  59     190.891 225.884 297.931  1.00  0.00           H  
ATOM    933  HZ3 LYS X  59     189.599 226.264 296.799  1.00  0.00           H  
ATOM    934  N   VAL X  60     196.136 221.748 295.647  1.00  0.00           N  
ATOM    935  CA  VAL X  60     196.606 220.698 294.704  1.00  0.00           C  
ATOM    936  C   VAL X  60     197.852 219.874 295.238  1.00  0.00           C  
ATOM    937  O   VAL X  60     198.224 218.868 294.681  1.00  0.00           O  
ATOM    938  CB  VAL X  60     196.892 221.266 293.290  1.00  0.00           C  
ATOM    939  CG1 VAL X  60     195.642 221.987 292.606  1.00  0.00           C  
ATOM    940  CG2 VAL X  60     198.013 222.307 293.223  1.00  0.00           C  
ATOM    941  H   VAL X  60     196.716 222.423 296.126  1.00  0.00           H  
ATOM    942  HA  VAL X  60     195.783 219.991 294.605  1.00  0.00           H  
ATOM    943  HB  VAL X  60     197.070 220.374 292.690  1.00  0.00           H  
ATOM    944 HG11 VAL X  60     195.843 222.422 291.626  1.00  0.00           H  
ATOM    945 HG12 VAL X  60     194.813 221.306 292.418  1.00  0.00           H  
ATOM    946 HG13 VAL X  60     195.367 222.838 293.229  1.00  0.00           H  
ATOM    947 HG21 VAL X  60     198.199 222.588 292.186  1.00  0.00           H  
ATOM    948 HG22 VAL X  60     198.898 221.790 293.595  1.00  0.00           H  
ATOM    949 HG23 VAL X  60     197.835 223.143 293.899  1.00  0.00           H  
ATOM    950  N   TYR X  61     198.420 220.299 296.372  1.00  0.00           N  
ATOM    951  CA  TYR X  61     199.515 219.674 297.151  1.00  0.00           C  
ATOM    952  C   TYR X  61     199.265 219.570 298.687  1.00  0.00           C  
ATOM    953  O   TYR X  61     198.437 220.292 299.162  1.00  0.00           O  
ATOM    954  CB  TYR X  61     200.871 220.287 296.813  1.00  0.00           C  
ATOM    955  CG  TYR X  61     201.261 220.493 295.360  1.00  0.00           C  
ATOM    956  CD1 TYR X  61     201.351 219.376 294.497  1.00  0.00           C  
ATOM    957  CD2 TYR X  61     201.506 221.788 294.842  1.00  0.00           C  
ATOM    958  CE1 TYR X  61     201.546 219.550 293.113  1.00  0.00           C  
ATOM    959  CE2 TYR X  61     201.877 221.910 293.475  1.00  0.00           C  
ATOM    960  CZ  TYR X  61     201.799 220.802 292.601  1.00  0.00           C  
ATOM    961  OH  TYR X  61     202.033 221.039 291.242  1.00  0.00           O  
ATOM    962  H   TYR X  61     197.998 221.050 296.899  1.00  0.00           H  
ATOM    963  HA  TYR X  61     199.563 218.645 296.795  1.00  0.00           H  
ATOM    964  HB2 TYR X  61     200.807 221.257 297.306  1.00  0.00           H  
ATOM    965  HB3 TYR X  61     201.539 219.648 297.390  1.00  0.00           H  
ATOM    966  HD1 TYR X  61     201.253 218.415 294.980  1.00  0.00           H  
ATOM    967  HD2 TYR X  61     201.454 222.662 295.476  1.00  0.00           H  
ATOM    968  HE1 TYR X  61     201.368 218.680 292.499  1.00  0.00           H  
ATOM    969  HE2 TYR X  61     202.050 222.847 292.967  1.00  0.00           H  
ATOM    970  HH  TYR X  61     202.232 221.973 291.149  1.00  0.00           H  
ATOM    971  N   GLY X  62     199.979 218.710 299.372  1.00  0.00           N  
ATOM    972  CA  GLY X  62     199.650 218.067 300.659  1.00  0.00           C  
ATOM    973  C   GLY X  62     200.220 218.660 301.984  1.00  0.00           C  
ATOM    974  O   GLY X  62     200.829 219.737 301.898  1.00  0.00           O  
ATOM    975  H   GLY X  62     200.792 218.404 298.855  1.00  0.00           H  
ATOM    976  HA2 GLY X  62     198.566 217.979 300.731  1.00  0.00           H  
ATOM    977  HA3 GLY X  62     199.882 217.002 300.701  1.00  0.00           H  
ATOM    978  N   PRO X  63     199.970 218.009 303.146  1.00  0.00           N  
ATOM    979  CA  PRO X  63     200.640 218.329 304.405  1.00  0.00           C  
ATOM    980  C   PRO X  63     202.174 218.521 304.283  1.00  0.00           C  
ATOM    981  O   PRO X  63     202.844 219.034 305.123  1.00  0.00           O  
ATOM    982  CB  PRO X  63     200.428 217.125 305.330  1.00  0.00           C  
ATOM    983  CG  PRO X  63     199.307 216.287 304.654  1.00  0.00           C  
ATOM    984  CD  PRO X  63     199.348 216.666 303.209  1.00  0.00           C  
ATOM    985  HA  PRO X  63     200.179 219.231 304.809  1.00  0.00           H  
ATOM    986  HB2 PRO X  63     201.338 216.526 305.345  1.00  0.00           H  
ATOM    987  HB3 PRO X  63     200.158 217.397 306.351  1.00  0.00           H  
ATOM    988  HG2 PRO X  63     199.556 215.227 304.702  1.00  0.00           H  
ATOM    989  HG3 PRO X  63     198.302 216.497 305.022  1.00  0.00           H  
ATOM    990  HD2 PRO X  63     200.032 216.005 302.677  1.00  0.00           H  
ATOM    991  HD3 PRO X  63     198.345 216.714 302.784  1.00  0.00           H  
ATOM    992  N   VAL X  64     202.831 218.073 303.194  1.00  0.00           N  
ATOM    993  CA  VAL X  64     204.263 218.220 302.902  1.00  0.00           C  
ATOM    994  C   VAL X  64     204.551 218.251 301.387  1.00  0.00           C  
ATOM    995  O   VAL X  64     204.164 217.369 300.623  1.00  0.00           O  
ATOM    996  CB  VAL X  64     205.106 217.240 303.676  1.00  0.00           C  
ATOM    997  CG1 VAL X  64     204.527 215.759 303.575  1.00  0.00           C  
ATOM    998  CG2 VAL X  64     206.601 217.177 303.360  1.00  0.00           C  
ATOM    999  H   VAL X  64     202.324 217.455 302.577  1.00  0.00           H  
ATOM   1000  HA  VAL X  64     204.657 219.186 303.219  1.00  0.00           H  
ATOM   1001  HB  VAL X  64     204.967 217.437 304.739  1.00  0.00           H  
ATOM   1002 HG11 VAL X  64     205.215 214.996 303.940  1.00  0.00           H  
ATOM   1003 HG12 VAL X  64     203.507 215.617 303.930  1.00  0.00           H  
ATOM   1004 HG13 VAL X  64     204.562 215.490 302.519  1.00  0.00           H  
ATOM   1005 HG21 VAL X  64     206.815 217.268 302.295  1.00  0.00           H  
ATOM   1006 HG22 VAL X  64     206.957 216.229 303.764  1.00  0.00           H  
ATOM   1007 HG23 VAL X  64     207.083 218.011 303.870  1.00  0.00           H  
ATOM   1008  N   PHE X  65     205.279 219.267 300.902  1.00  0.00           N  
ATOM   1009  CA  PHE X  65     205.829 219.338 299.524  1.00  0.00           C  
ATOM   1010  C   PHE X  65     207.080 220.228 299.307  1.00  0.00           C  
ATOM   1011  O   PHE X  65     207.846 220.339 300.286  1.00  0.00           O  
ATOM   1012  CB  PHE X  65     204.733 219.768 298.493  1.00  0.00           C  
ATOM   1013  CG  PHE X  65     203.957 221.073 298.862  1.00  0.00           C  
ATOM   1014  CD1 PHE X  65     202.747 220.969 299.556  1.00  0.00           C  
ATOM   1015  CD2 PHE X  65     204.357 222.297 298.397  1.00  0.00           C  
ATOM   1016  CE1 PHE X  65     201.946 222.111 299.723  1.00  0.00           C  
ATOM   1017  CE2 PHE X  65     203.501 223.436 298.431  1.00  0.00           C  
ATOM   1018  CZ  PHE X  65     202.278 223.317 299.128  1.00  0.00           C  
ATOM   1019  H   PHE X  65     205.560 220.022 301.511  1.00  0.00           H  
ATOM   1020  HA  PHE X  65     206.133 218.316 299.296  1.00  0.00           H  
ATOM   1021  HB2 PHE X  65     205.127 219.653 297.483  1.00  0.00           H  
ATOM   1022  HB3 PHE X  65     204.025 218.941 298.553  1.00  0.00           H  
ATOM   1023  HD1 PHE X  65     202.515 219.980 299.924  1.00  0.00           H  
ATOM   1024  HD2 PHE X  65     205.286 222.273 297.846  1.00  0.00           H  
ATOM   1025  HE1 PHE X  65     200.971 221.950 300.159  1.00  0.00           H  
ATOM   1026  HE2 PHE X  65     203.734 224.432 298.084  1.00  0.00           H  
ATOM   1027  HZ  PHE X  65     201.603 224.159 299.078  1.00  0.00           H  
ATOM   1028  N   THR X  66     207.527 220.716 298.091  1.00  0.00           N  
ATOM   1029  CA  THR X  66     208.679 221.513 297.816  1.00  0.00           C  
ATOM   1030  C   THR X  66     208.452 222.674 296.891  1.00  0.00           C  
ATOM   1031  O   THR X  66     207.801 222.595 295.873  1.00  0.00           O  
ATOM   1032  CB  THR X  66     209.898 220.628 297.304  1.00  0.00           C  
ATOM   1033  CG2 THR X  66     211.240 221.361 297.119  1.00  0.00           C  
ATOM   1034  OG1 THR X  66     210.131 219.533 298.208  1.00  0.00           O  
ATOM   1035  H   THR X  66     207.048 220.392 297.263  1.00  0.00           H  
ATOM   1036  HA  THR X  66     209.023 221.976 298.741  1.00  0.00           H  
ATOM   1037  HB  THR X  66     209.626 220.288 296.305  1.00  0.00           H  
ATOM   1038  HG1 THR X  66     209.285 219.084 298.258  1.00  0.00           H  
ATOM   1039 HG21 THR X  66     211.570 221.650 298.117  1.00  0.00           H  
ATOM   1040 HG22 THR X  66     211.182 222.364 296.696  1.00  0.00           H  
ATOM   1041 HG23 THR X  66     212.003 220.742 296.648  1.00  0.00           H  
ATOM   1042  N   LEU X  67     209.015 223.844 297.226  1.00  0.00           N  
ATOM   1043  CA  LEU X  67     209.162 225.003 296.304  1.00  0.00           C  
ATOM   1044  C   LEU X  67     210.546 225.016 295.547  1.00  0.00           C  
ATOM   1045  O   LEU X  67     211.544 224.562 296.036  1.00  0.00           O  
ATOM   1046  CB  LEU X  67     208.814 226.360 296.955  1.00  0.00           C  
ATOM   1047  CG  LEU X  67     207.461 226.488 297.788  1.00  0.00           C  
ATOM   1048  CD1 LEU X  67     207.187 227.898 298.194  1.00  0.00           C  
ATOM   1049  CD2 LEU X  67     206.266 226.099 296.899  1.00  0.00           C  
ATOM   1050  H   LEU X  67     209.591 223.821 298.055  1.00  0.00           H  
ATOM   1051  HA  LEU X  67     208.429 224.882 295.506  1.00  0.00           H  
ATOM   1052  HB2 LEU X  67     209.674 226.624 297.570  1.00  0.00           H  
ATOM   1053  HB3 LEU X  67     208.837 227.140 296.194  1.00  0.00           H  
ATOM   1054  HG  LEU X  67     207.347 225.928 298.716  1.00  0.00           H  
ATOM   1055 HD11 LEU X  67     207.140 228.361 297.209  1.00  0.00           H  
ATOM   1056 HD12 LEU X  67     208.025 228.250 298.796  1.00  0.00           H  
ATOM   1057 HD13 LEU X  67     206.203 228.062 298.634  1.00  0.00           H  
ATOM   1058 HD21 LEU X  67     206.392 226.571 295.925  1.00  0.00           H  
ATOM   1059 HD22 LEU X  67     206.191 225.015 296.808  1.00  0.00           H  
ATOM   1060 HD23 LEU X  67     205.292 226.428 297.261  1.00  0.00           H  
ATOM   1061  N   TYR X  68     210.608 225.539 294.294  1.00  0.00           N  
ATOM   1062  CA  TYR X  68     211.720 225.341 293.316  1.00  0.00           C  
ATOM   1063  C   TYR X  68     212.130 226.541 292.470  1.00  0.00           C  
ATOM   1064  O   TYR X  68     211.246 227.008 291.725  1.00  0.00           O  
ATOM   1065  CB  TYR X  68     211.283 224.190 292.451  1.00  0.00           C  
ATOM   1066  CG  TYR X  68     212.144 224.025 291.224  1.00  0.00           C  
ATOM   1067  CD1 TYR X  68     213.477 223.580 291.380  1.00  0.00           C  
ATOM   1068  CD2 TYR X  68     211.653 224.158 289.927  1.00  0.00           C  
ATOM   1069  CE1 TYR X  68     214.292 223.410 290.183  1.00  0.00           C  
ATOM   1070  CE2 TYR X  68     212.413 223.971 288.763  1.00  0.00           C  
ATOM   1071  CZ  TYR X  68     213.767 223.535 288.861  1.00  0.00           C  
ATOM   1072  OH  TYR X  68     214.602 223.466 287.717  1.00  0.00           O  
ATOM   1073  H   TYR X  68     209.806 226.031 293.927  1.00  0.00           H  
ATOM   1074  HA  TYR X  68     212.625 225.033 293.840  1.00  0.00           H  
ATOM   1075  HB2 TYR X  68     211.307 223.230 292.967  1.00  0.00           H  
ATOM   1076  HB3 TYR X  68     210.302 224.452 292.057  1.00  0.00           H  
ATOM   1077  HD1 TYR X  68     213.860 223.396 292.373  1.00  0.00           H  
ATOM   1078  HD2 TYR X  68     210.601 224.306 289.737  1.00  0.00           H  
ATOM   1079  HE1 TYR X  68     215.316 223.104 290.334  1.00  0.00           H  
ATOM   1080  HE2 TYR X  68     211.974 224.281 287.826  1.00  0.00           H  
ATOM   1081  HH  TYR X  68     214.346 224.111 287.055  1.00  0.00           H  
ATOM   1082  N   PHE X  69     213.411 226.927 292.416  1.00  0.00           N  
ATOM   1083  CA  PHE X  69     213.946 228.016 291.672  1.00  0.00           C  
ATOM   1084  C   PHE X  69     215.319 227.752 291.006  1.00  0.00           C  
ATOM   1085  O   PHE X  69     216.293 228.568 291.145  1.00  0.00           O  
ATOM   1086  CB  PHE X  69     214.129 229.233 292.587  1.00  0.00           C  
ATOM   1087  CG  PHE X  69     212.929 229.576 293.392  1.00  0.00           C  
ATOM   1088  CD1 PHE X  69     212.183 230.725 292.994  1.00  0.00           C  
ATOM   1089  CD2 PHE X  69     212.620 228.896 294.554  1.00  0.00           C  
ATOM   1090  CE1 PHE X  69     211.021 231.113 293.693  1.00  0.00           C  
ATOM   1091  CE2 PHE X  69     211.392 229.242 295.227  1.00  0.00           C  
ATOM   1092  CZ  PHE X  69     210.754 230.436 294.868  1.00  0.00           C  
ATOM   1093  H   PHE X  69     214.035 226.307 292.912  1.00  0.00           H  
ATOM   1094  HA  PHE X  69     213.348 228.222 290.784  1.00  0.00           H  
ATOM   1095  HB2 PHE X  69     214.878 228.918 293.313  1.00  0.00           H  
ATOM   1096  HB3 PHE X  69     214.450 230.134 292.063  1.00  0.00           H  
ATOM   1097  HD1 PHE X  69     212.587 231.300 292.174  1.00  0.00           H  
ATOM   1098  HD2 PHE X  69     213.226 228.035 294.794  1.00  0.00           H  
ATOM   1099  HE1 PHE X  69     210.479 232.041 293.584  1.00  0.00           H  
ATOM   1100  HE2 PHE X  69     211.220 228.751 296.173  1.00  0.00           H  
ATOM   1101  HZ  PHE X  69     209.878 230.716 295.434  1.00  0.00           H  
ATOM   1102  N   GLY X  70     215.500 226.517 290.500  1.00  0.00           N  
ATOM   1103  CA  GLY X  70     216.720 226.114 289.846  1.00  0.00           C  
ATOM   1104  C   GLY X  70     217.670 225.572 290.893  1.00  0.00           C  
ATOM   1105  O   GLY X  70     217.961 224.398 290.764  1.00  0.00           O  
ATOM   1106  H   GLY X  70     214.719 225.879 290.441  1.00  0.00           H  
ATOM   1107  HA2 GLY X  70     216.503 225.368 289.081  1.00  0.00           H  
ATOM   1108  HA3 GLY X  70     217.161 226.915 289.253  1.00  0.00           H  
ATOM   1109  N   LEU X  71     218.047 226.443 291.807  1.00  0.00           N  
ATOM   1110  CA  LEU X  71     218.993 226.202 292.893  1.00  0.00           C  
ATOM   1111  C   LEU X  71     218.393 226.003 294.290  1.00  0.00           C  
ATOM   1112  O   LEU X  71     217.482 226.796 294.647  1.00  0.00           O  
ATOM   1113  CB  LEU X  71     220.036 227.272 292.844  1.00  0.00           C  
ATOM   1114  CG  LEU X  71     220.994 227.219 291.582  1.00  0.00           C  
ATOM   1115  CD1 LEU X  71     221.087 228.657 291.009  1.00  0.00           C  
ATOM   1116  CD2 LEU X  71     222.400 226.843 292.037  1.00  0.00           C  
ATOM   1117  H   LEU X  71     217.481 227.272 291.920  1.00  0.00           H  
ATOM   1118  HA  LEU X  71     219.549 225.277 292.737  1.00  0.00           H  
ATOM   1119  HB2 LEU X  71     219.559 228.248 292.931  1.00  0.00           H  
ATOM   1120  HB3 LEU X  71     220.692 227.062 293.689  1.00  0.00           H  
ATOM   1121  HG  LEU X  71     220.653 226.564 290.781  1.00  0.00           H  
ATOM   1122 HD11 LEU X  71     220.121 229.003 290.641  1.00  0.00           H  
ATOM   1123 HD12 LEU X  71     221.693 228.691 290.103  1.00  0.00           H  
ATOM   1124 HD13 LEU X  71     221.460 229.352 291.761  1.00  0.00           H  
ATOM   1125 HD21 LEU X  71     222.735 227.447 292.880  1.00  0.00           H  
ATOM   1126 HD22 LEU X  71     222.421 225.782 292.286  1.00  0.00           H  
ATOM   1127 HD23 LEU X  71     223.085 227.049 291.215  1.00  0.00           H  
ATOM   1128  N   LYS X  72     218.812 225.000 295.022  1.00  0.00           N  
ATOM   1129  CA  LYS X  72     218.547 224.665 296.412  1.00  0.00           C  
ATOM   1130  C   LYS X  72     217.012 224.349 296.713  1.00  0.00           C  
ATOM   1131  O   LYS X  72     216.228 225.268 297.056  1.00  0.00           O  
ATOM   1132  CB  LYS X  72     219.059 225.784 297.304  1.00  0.00           C  
ATOM   1133  CG  LYS X  72     219.107 225.445 298.827  1.00  0.00           C  
ATOM   1134  CD  LYS X  72     219.332 226.590 299.765  1.00  0.00           C  
ATOM   1135  CE  LYS X  72     219.775 226.308 301.197  1.00  0.00           C  
ATOM   1136  NZ  LYS X  72     220.345 227.630 301.641  1.00  0.00           N1+
ATOM   1137  H   LYS X  72     219.521 224.440 294.571  1.00  0.00           H  
ATOM   1138  HA  LYS X  72     219.088 223.729 296.550  1.00  0.00           H  
ATOM   1139  HB2 LYS X  72     220.032 226.020 296.874  1.00  0.00           H  
ATOM   1140  HB3 LYS X  72     218.525 226.710 297.090  1.00  0.00           H  
ATOM   1141  HG2 LYS X  72     218.158 225.045 299.184  1.00  0.00           H  
ATOM   1142  HG3 LYS X  72     219.853 224.668 298.996  1.00  0.00           H  
ATOM   1143  HD2 LYS X  72     220.114 227.170 299.276  1.00  0.00           H  
ATOM   1144  HD3 LYS X  72     218.387 227.130 299.713  1.00  0.00           H  
ATOM   1145  HE2 LYS X  72     218.923 226.068 301.833  1.00  0.00           H  
ATOM   1146  HE3 LYS X  72     220.571 225.565 301.247  1.00  0.00           H  
ATOM   1147  HZ1 LYS X  72     221.185 227.921 301.162  1.00  0.00           H  
ATOM   1148  HZ2 LYS X  72     220.647 227.551 302.601  1.00  0.00           H  
ATOM   1149  HZ3 LYS X  72     219.733 228.418 301.484  1.00  0.00           H  
ATOM   1150  N   PRO X  73     216.461 223.143 296.636  1.00  0.00           N  
ATOM   1151  CA  PRO X  73     215.051 222.919 296.926  1.00  0.00           C  
ATOM   1152  C   PRO X  73     214.771 223.224 298.379  1.00  0.00           C  
ATOM   1153  O   PRO X  73     215.667 223.270 299.214  1.00  0.00           O  
ATOM   1154  CB  PRO X  73     214.801 221.483 296.506  1.00  0.00           C  
ATOM   1155  CG  PRO X  73     215.975 221.092 295.573  1.00  0.00           C  
ATOM   1156  CD  PRO X  73     217.054 221.935 296.121  1.00  0.00           C  
ATOM   1157  HA  PRO X  73     214.430 223.616 296.363  1.00  0.00           H  
ATOM   1158  HB2 PRO X  73     214.751 220.689 297.251  1.00  0.00           H  
ATOM   1159  HB3 PRO X  73     213.857 221.441 295.962  1.00  0.00           H  
ATOM   1160  HG2 PRO X  73     216.234 220.035 295.514  1.00  0.00           H  
ATOM   1161  HG3 PRO X  73     215.832 221.480 294.565  1.00  0.00           H  
ATOM   1162  HD2 PRO X  73     217.546 221.403 296.936  1.00  0.00           H  
ATOM   1163  HD3 PRO X  73     217.806 222.106 295.350  1.00  0.00           H  
ATOM   1164  N   ILE X  74     213.559 223.570 298.781  1.00  0.00           N  
ATOM   1165  CA  ILE X  74     213.168 223.918 300.151  1.00  0.00           C  
ATOM   1166  C   ILE X  74     211.845 223.253 300.388  1.00  0.00           C  
ATOM   1167  O   ILE X  74     210.876 223.452 299.612  1.00  0.00           O  
ATOM   1168  CB  ILE X  74     213.174 225.477 300.265  1.00  0.00           C  
ATOM   1169  CG1 ILE X  74     214.630 225.978 300.142  1.00  0.00           C  
ATOM   1170  CG2 ILE X  74     212.684 225.761 301.608  1.00  0.00           C  
ATOM   1171  CD1 ILE X  74     214.906 227.506 300.024  1.00  0.00           C  
ATOM   1172  H   ILE X  74     212.825 223.627 298.090  1.00  0.00           H  
ATOM   1173  HA  ILE X  74     213.821 223.416 300.865  1.00  0.00           H  
ATOM   1174  HB  ILE X  74     212.553 225.906 299.479  1.00  0.00           H  
ATOM   1175 HG12 ILE X  74     215.172 225.590 301.004  1.00  0.00           H  
ATOM   1176 HG13 ILE X  74     214.991 225.690 299.155  1.00  0.00           H  
ATOM   1177 HG21 ILE X  74     213.284 225.334 302.411  1.00  0.00           H  
ATOM   1178 HG22 ILE X  74     211.654 225.423 301.729  1.00  0.00           H  
ATOM   1179 HG23 ILE X  74     212.550 226.840 301.692  1.00  0.00           H  
ATOM   1180 HD11 ILE X  74     214.245 227.938 299.273  1.00  0.00           H  
ATOM   1181 HD12 ILE X  74     215.912 227.587 299.611  1.00  0.00           H  
ATOM   1182 HD13 ILE X  74     214.791 227.910 301.030  1.00  0.00           H  
ATOM   1183  N   VAL X  75     211.784 222.283 301.337  1.00  0.00           N  
ATOM   1184  CA  VAL X  75     210.600 221.533 301.638  1.00  0.00           C  
ATOM   1185  C   VAL X  75     209.707 222.183 302.604  1.00  0.00           C  
ATOM   1186  O   VAL X  75     210.141 222.553 303.745  1.00  0.00           O  
ATOM   1187  CB  VAL X  75     211.088 220.201 302.195  1.00  0.00           C  
ATOM   1188  CG1 VAL X  75     209.881 219.292 302.465  1.00  0.00           C  
ATOM   1189  CG2 VAL X  75     212.059 219.408 301.402  1.00  0.00           C  
ATOM   1190  H   VAL X  75     212.610 222.162 301.905  1.00  0.00           H  
ATOM   1191  HA  VAL X  75     210.131 221.376 300.667  1.00  0.00           H  
ATOM   1192  HB  VAL X  75     211.632 220.266 303.137  1.00  0.00           H  
ATOM   1193 HG11 VAL X  75     209.051 219.815 302.940  1.00  0.00           H  
ATOM   1194 HG12 VAL X  75     209.499 218.623 301.694  1.00  0.00           H  
ATOM   1195 HG13 VAL X  75     210.159 218.665 303.312  1.00  0.00           H  
ATOM   1196 HG21 VAL X  75     211.625 219.129 300.442  1.00  0.00           H  
ATOM   1197 HG22 VAL X  75     212.426 218.554 301.973  1.00  0.00           H  
ATOM   1198 HG23 VAL X  75     212.912 220.060 301.220  1.00  0.00           H  
ATOM   1199  N   VAL X  76     208.447 222.338 302.269  1.00  0.00           N  
ATOM   1200  CA  VAL X  76     207.471 223.151 302.977  1.00  0.00           C  
ATOM   1201  C   VAL X  76     206.419 222.173 303.589  1.00  0.00           C  
ATOM   1202  O   VAL X  76     205.742 221.322 302.916  1.00  0.00           O  
ATOM   1203  CB  VAL X  76     206.681 224.193 302.183  1.00  0.00           C  
ATOM   1204  CG1 VAL X  76     207.462 225.497 302.246  1.00  0.00           C  
ATOM   1205  CG2 VAL X  76     206.352 223.852 300.725  1.00  0.00           C  
ATOM   1206  H   VAL X  76     208.145 221.782 301.482  1.00  0.00           H  
ATOM   1207  HA  VAL X  76     207.987 223.709 303.758  1.00  0.00           H  
ATOM   1208  HB  VAL X  76     205.746 224.346 302.723  1.00  0.00           H  
ATOM   1209 HG11 VAL X  76     207.426 225.736 303.309  1.00  0.00           H  
ATOM   1210 HG12 VAL X  76     208.532 225.349 302.098  1.00  0.00           H  
ATOM   1211 HG13 VAL X  76     207.122 226.352 301.661  1.00  0.00           H  
ATOM   1212 HG21 VAL X  76     205.749 222.957 300.877  1.00  0.00           H  
ATOM   1213 HG22 VAL X  76     207.273 223.630 300.187  1.00  0.00           H  
ATOM   1214 HG23 VAL X  76     205.736 224.636 300.285  1.00  0.00           H  
ATOM   1215  N   LEU X  77     206.106 222.334 304.889  1.00  0.00           N  
ATOM   1216  CA  LEU X  77     204.988 221.724 305.591  1.00  0.00           C  
ATOM   1217  C   LEU X  77     203.811 222.699 306.029  1.00  0.00           C  
ATOM   1218  O   LEU X  77     204.101 223.833 306.351  1.00  0.00           O  
ATOM   1219  CB  LEU X  77     205.582 221.067 306.858  1.00  0.00           C  
ATOM   1220  CG  LEU X  77     206.541 219.892 306.552  1.00  0.00           C  
ATOM   1221  CD1 LEU X  77     207.950 220.451 306.698  1.00  0.00           C  
ATOM   1222  CD2 LEU X  77     206.272 218.639 307.420  1.00  0.00           C  
ATOM   1223  H   LEU X  77     206.584 223.104 305.335  1.00  0.00           H  
ATOM   1224  HA  LEU X  77     204.547 220.927 304.993  1.00  0.00           H  
ATOM   1225  HB2 LEU X  77     206.027 221.795 307.537  1.00  0.00           H  
ATOM   1226  HB3 LEU X  77     204.710 220.650 307.362  1.00  0.00           H  
ATOM   1227  HG  LEU X  77     206.370 219.566 305.526  1.00  0.00           H  
ATOM   1228 HD11 LEU X  77     207.925 220.679 307.763  1.00  0.00           H  
ATOM   1229 HD12 LEU X  77     207.995 221.385 306.138  1.00  0.00           H  
ATOM   1230 HD13 LEU X  77     208.682 219.679 306.461  1.00  0.00           H  
ATOM   1231 HD21 LEU X  77     206.876 217.827 307.015  1.00  0.00           H  
ATOM   1232 HD22 LEU X  77     206.650 218.880 308.413  1.00  0.00           H  
ATOM   1233 HD23 LEU X  77     205.251 218.289 307.572  1.00  0.00           H  
ATOM   1234  N   HID X  78     202.552 222.257 306.074  1.00  0.00           N  
ATOM   1235  CA  HID X  78     201.308 222.966 306.602  1.00  0.00           C  
ATOM   1236  C   HID X  78     200.257 222.022 307.168  1.00  0.00           C  
ATOM   1237  O   HID X  78     200.137 220.872 306.746  1.00  0.00           O  
ATOM   1238  CB  HID X  78     200.696 223.860 305.463  1.00  0.00           C  
ATOM   1239  CG  HID X  78     199.773 223.195 304.402  1.00  0.00           C  
ATOM   1240  CD2 HID X  78     198.476 223.457 304.186  1.00  0.00           C  
ATOM   1241  ND1 HID X  78     200.129 222.351 303.332  1.00  0.00           N  
ATOM   1242  CE1 HID X  78     199.084 222.041 302.621  1.00  0.00           C  
ATOM   1243  NE2 HID X  78     198.039 222.726 303.082  1.00  0.00           N  
ATOM   1244  H   HID X  78     202.454 221.285 305.816  1.00  0.00           H  
ATOM   1245  HA  HID X  78     201.665 223.650 307.372  1.00  0.00           H  
ATOM   1246  HB2 HID X  78     200.199 224.716 305.918  1.00  0.00           H  
ATOM   1247  HB3 HID X  78     201.517 224.383 304.972  1.00  0.00           H  
ATOM   1248  HD1 HID X  78     201.055 222.006 303.123  1.00  0.00           H  
ATOM   1249  HD2 HID X  78     197.834 224.048 304.822  1.00  0.00           H  
ATOM   1250  HE1 HID X  78     199.097 221.518 301.676  1.00  0.00           H  
ATOM   1251  N   GLY X  79     199.452 222.584 308.081  1.00  0.00           N  
ATOM   1252  CA  GLY X  79     198.275 222.129 308.830  1.00  0.00           C  
ATOM   1253  C   GLY X  79     198.640 221.629 310.211  1.00  0.00           C  
ATOM   1254  O   GLY X  79     199.729 221.100 310.355  1.00  0.00           O  
ATOM   1255  H   GLY X  79     199.635 223.554 308.295  1.00  0.00           H  
ATOM   1256  HA2 GLY X  79     197.598 222.982 308.886  1.00  0.00           H  
ATOM   1257  HA3 GLY X  79     197.865 221.226 308.377  1.00  0.00           H  
ATOM   1258  N   TYR X  80     197.744 221.655 311.197  1.00  0.00           N  
ATOM   1259  CA  TYR X  80     198.158 221.370 312.538  1.00  0.00           C  
ATOM   1260  C   TYR X  80     198.829 219.978 312.790  1.00  0.00           C  
ATOM   1261  O   TYR X  80     199.757 219.968 313.638  1.00  0.00           O  
ATOM   1262  CB  TYR X  80     196.910 221.563 313.463  1.00  0.00           C  
ATOM   1263  CG  TYR X  80     197.106 221.474 314.921  1.00  0.00           C  
ATOM   1264  CD1 TYR X  80     198.151 222.253 315.532  1.00  0.00           C  
ATOM   1265  CD2 TYR X  80     196.364 220.558 315.718  1.00  0.00           C  
ATOM   1266  CE1 TYR X  80     198.184 222.331 316.974  1.00  0.00           C  
ATOM   1267  CE2 TYR X  80     196.774 220.406 317.108  1.00  0.00           C  
ATOM   1268  CZ  TYR X  80     197.635 221.332 317.768  1.00  0.00           C  
ATOM   1269  OH  TYR X  80     197.843 221.361 319.090  1.00  0.00           O  
ATOM   1270  H   TYR X  80     196.908 222.168 310.957  1.00  0.00           H  
ATOM   1271  HA  TYR X  80     198.845 222.166 312.825  1.00  0.00           H  
ATOM   1272  HB2 TYR X  80     196.407 222.513 313.281  1.00  0.00           H  
ATOM   1273  HB3 TYR X  80     196.249 220.757 313.145  1.00  0.00           H  
ATOM   1274  HD1 TYR X  80     198.859 222.872 315.000  1.00  0.00           H  
ATOM   1275  HD2 TYR X  80     195.620 219.909 315.281  1.00  0.00           H  
ATOM   1276  HE1 TYR X  80     198.651 223.204 317.406  1.00  0.00           H  
ATOM   1277  HE2 TYR X  80     196.342 219.567 317.634  1.00  0.00           H  
ATOM   1278  HH  TYR X  80     198.729 221.657 319.314  1.00  0.00           H  
ATOM   1279  N   GLU X  81     198.437 218.930 312.134  1.00  0.00           N  
ATOM   1280  CA  GLU X  81     199.107 217.619 312.308  1.00  0.00           C  
ATOM   1281  C   GLU X  81     200.511 217.431 311.768  1.00  0.00           C  
ATOM   1282  O   GLU X  81     201.275 216.751 312.406  1.00  0.00           O  
ATOM   1283  CB  GLU X  81     198.123 216.643 311.606  1.00  0.00           C  
ATOM   1284  CG  GLU X  81     198.381 215.111 311.551  1.00  0.00           C  
ATOM   1285  CD  GLU X  81     197.881 214.312 312.787  1.00  0.00           C  
ATOM   1286  OE1 GLU X  81     198.211 214.668 313.962  1.00  0.00           O  
ATOM   1287  OE2 GLU X  81     197.169 213.312 312.583  1.00  0.00           O1-
ATOM   1288  H   GLU X  81     197.831 219.051 311.336  1.00  0.00           H  
ATOM   1289  HA  GLU X  81     199.047 217.407 313.376  1.00  0.00           H  
ATOM   1290  HB2 GLU X  81     197.092 216.723 311.950  1.00  0.00           H  
ATOM   1291  HB3 GLU X  81     198.137 216.942 310.558  1.00  0.00           H  
ATOM   1292  HG2 GLU X  81     197.874 214.725 310.667  1.00  0.00           H  
ATOM   1293  HG3 GLU X  81     199.443 214.959 311.355  1.00  0.00           H  
ATOM   1294  N   ALA X  82     200.794 218.062 310.599  1.00  0.00           N  
ATOM   1295  CA  ALA X  82     202.115 218.369 310.140  1.00  0.00           C  
ATOM   1296  C   ALA X  82     202.884 219.203 311.088  1.00  0.00           C  
ATOM   1297  O   ALA X  82     204.013 218.912 311.467  1.00  0.00           O  
ATOM   1298  CB  ALA X  82     202.005 219.098 308.768  1.00  0.00           C  
ATOM   1299  H   ALA X  82     200.060 218.553 310.108  1.00  0.00           H  
ATOM   1300  HA  ALA X  82     202.734 217.477 310.045  1.00  0.00           H  
ATOM   1301  HB1 ALA X  82     201.260 219.881 308.911  1.00  0.00           H  
ATOM   1302  HB2 ALA X  82     201.520 218.560 307.954  1.00  0.00           H  
ATOM   1303  HB3 ALA X  82     203.003 219.441 308.494  1.00  0.00           H  
ATOM   1304  N   VAL X  83     202.285 220.311 311.614  1.00  0.00           N  
ATOM   1305  CA  VAL X  83     203.032 221.365 312.376  1.00  0.00           C  
ATOM   1306  C   VAL X  83     203.307 220.768 313.752  1.00  0.00           C  
ATOM   1307  O   VAL X  83     204.380 221.004 314.270  1.00  0.00           O  
ATOM   1308  CB  VAL X  83     202.310 222.639 312.378  1.00  0.00           C  
ATOM   1309  CG1 VAL X  83     203.021 223.637 313.336  1.00  0.00           C  
ATOM   1310  CG2 VAL X  83     202.187 223.285 310.988  1.00  0.00           C  
ATOM   1311  H   VAL X  83     201.366 220.582 311.293  1.00  0.00           H  
ATOM   1312  HA  VAL X  83     204.021 221.496 311.936  1.00  0.00           H  
ATOM   1313  HB  VAL X  83     201.319 222.382 312.753  1.00  0.00           H  
ATOM   1314 HG11 VAL X  83     202.955 223.253 314.354  1.00  0.00           H  
ATOM   1315 HG12 VAL X  83     204.069 223.779 313.074  1.00  0.00           H  
ATOM   1316 HG13 VAL X  83     202.474 224.579 313.292  1.00  0.00           H  
ATOM   1317 HG21 VAL X  83     201.985 222.638 310.134  1.00  0.00           H  
ATOM   1318 HG22 VAL X  83     203.137 223.776 310.779  1.00  0.00           H  
ATOM   1319 HG23 VAL X  83     201.418 224.051 311.085  1.00  0.00           H  
ATOM   1320  N   LYS X  84     202.457 219.913 314.305  1.00  0.00           N  
ATOM   1321  CA  LYS X  84     202.671 219.156 315.537  1.00  0.00           C  
ATOM   1322  C   LYS X  84     203.870 218.180 315.397  1.00  0.00           C  
ATOM   1323  O   LYS X  84     204.649 218.058 316.310  1.00  0.00           O  
ATOM   1324  CB  LYS X  84     201.319 218.626 315.905  1.00  0.00           C  
ATOM   1325  CG  LYS X  84     201.346 217.752 317.237  1.00  0.00           C  
ATOM   1326  CD  LYS X  84     199.897 217.525 317.665  1.00  0.00           C  
ATOM   1327  CE  LYS X  84     199.025 216.808 316.640  1.00  0.00           C  
ATOM   1328  NZ  LYS X  84     199.590 215.520 316.152  1.00  0.00           N1+
ATOM   1329  H   LYS X  84     201.575 219.702 313.863  1.00  0.00           H  
ATOM   1330  HA  LYS X  84     203.036 219.896 316.250  1.00  0.00           H  
ATOM   1331  HB2 LYS X  84     200.778 219.570 315.967  1.00  0.00           H  
ATOM   1332  HB3 LYS X  84     200.967 217.996 315.088  1.00  0.00           H  
ATOM   1333  HG2 LYS X  84     201.794 216.796 316.964  1.00  0.00           H  
ATOM   1334  HG3 LYS X  84     201.957 218.241 317.996  1.00  0.00           H  
ATOM   1335  HD2 LYS X  84     199.919 217.022 318.632  1.00  0.00           H  
ATOM   1336  HD3 LYS X  84     199.499 218.511 317.908  1.00  0.00           H  
ATOM   1337  HE2 LYS X  84     198.032 216.622 317.049  1.00  0.00           H  
ATOM   1338  HE3 LYS X  84     198.734 217.444 315.804  1.00  0.00           H  
ATOM   1339  HZ1 LYS X  84     199.798 214.866 316.894  1.00  0.00           H  
ATOM   1340  HZ2 LYS X  84     200.314 215.678 315.465  1.00  0.00           H  
ATOM   1341  HZ3 LYS X  84     198.801 215.164 315.632  1.00  0.00           H  
ATOM   1342  N   GLU X  85     203.912 217.419 314.289  1.00  0.00           N  
ATOM   1343  CA  GLU X  85     205.095 216.578 313.991  1.00  0.00           C  
ATOM   1344  C   GLU X  85     206.419 217.262 313.804  1.00  0.00           C  
ATOM   1345  O   GLU X  85     207.487 216.892 314.333  1.00  0.00           O  
ATOM   1346  CB  GLU X  85     204.858 215.687 312.787  1.00  0.00           C  
ATOM   1347  CG  GLU X  85     205.454 214.277 312.741  1.00  0.00           C  
ATOM   1348  CD  GLU X  85     204.809 213.272 313.696  1.00  0.00           C  
ATOM   1349  OE1 GLU X  85     204.406 213.663 314.831  1.00  0.00           O  
ATOM   1350  OE2 GLU X  85     204.636 212.095 313.333  1.00  0.00           O1-
ATOM   1351  H   GLU X  85     203.307 217.586 313.498  1.00  0.00           H  
ATOM   1352  HA  GLU X  85     205.264 215.955 314.870  1.00  0.00           H  
ATOM   1353  HB2 GLU X  85     203.788 215.646 312.583  1.00  0.00           H  
ATOM   1354  HB3 GLU X  85     205.218 216.356 312.005  1.00  0.00           H  
ATOM   1355  HG2 GLU X  85     205.427 213.863 311.734  1.00  0.00           H  
ATOM   1356  HG3 GLU X  85     206.516 214.381 312.962  1.00  0.00           H  
ATOM   1357  N   ALA X  86     206.467 218.440 313.163  1.00  0.00           N  
ATOM   1358  CA  ALA X  86     207.599 219.260 312.888  1.00  0.00           C  
ATOM   1359  C   ALA X  86     208.278 219.945 314.048  1.00  0.00           C  
ATOM   1360  O   ALA X  86     209.407 220.463 313.942  1.00  0.00           O  
ATOM   1361  CB  ALA X  86     207.202 220.301 311.861  1.00  0.00           C  
ATOM   1362  H   ALA X  86     205.637 218.737 312.670  1.00  0.00           H  
ATOM   1363  HA  ALA X  86     208.306 218.570 312.428  1.00  0.00           H  
ATOM   1364  HB1 ALA X  86     206.644 219.861 311.034  1.00  0.00           H  
ATOM   1365  HB2 ALA X  86     208.102 220.592 311.319  1.00  0.00           H  
ATOM   1366  HB3 ALA X  86     206.728 221.091 312.442  1.00  0.00           H  
ATOM   1367  N   LEU X  87     207.617 219.995 315.254  1.00  0.00           N  
ATOM   1368  CA  LEU X  87     207.955 220.781 316.403  1.00  0.00           C  
ATOM   1369  C   LEU X  87     208.126 219.980 317.698  1.00  0.00           C  
ATOM   1370  O   LEU X  87     209.093 220.212 318.405  1.00  0.00           O  
ATOM   1371  CB  LEU X  87     206.837 221.863 316.561  1.00  0.00           C  
ATOM   1372  CG  LEU X  87     206.799 223.011 315.450  1.00  0.00           C  
ATOM   1373  CD1 LEU X  87     205.810 224.073 315.838  1.00  0.00           C  
ATOM   1374  CD2 LEU X  87     208.134 223.746 315.311  1.00  0.00           C  
ATOM   1375  H   LEU X  87     206.633 219.767 315.238  1.00  0.00           H  
ATOM   1376  HA  LEU X  87     208.880 221.314 316.187  1.00  0.00           H  
ATOM   1377  HB2 LEU X  87     205.847 221.458 316.772  1.00  0.00           H  
ATOM   1378  HB3 LEU X  87     207.081 222.303 317.528  1.00  0.00           H  
ATOM   1379  HG  LEU X  87     206.520 222.630 314.468  1.00  0.00           H  
ATOM   1380 HD11 LEU X  87     205.766 224.849 315.074  1.00  0.00           H  
ATOM   1381 HD12 LEU X  87     206.137 224.496 316.789  1.00  0.00           H  
ATOM   1382 HD13 LEU X  87     204.789 223.728 315.999  1.00  0.00           H  
ATOM   1383 HD21 LEU X  87     208.623 224.003 316.251  1.00  0.00           H  
ATOM   1384 HD22 LEU X  87     208.842 223.131 314.755  1.00  0.00           H  
ATOM   1385 HD23 LEU X  87     207.949 224.586 314.641  1.00  0.00           H  
ATOM   1386  N   ILE X  88     207.285 218.974 317.901  1.00  0.00           N  
ATOM   1387  CA  ILE X  88     207.482 217.869 318.894  1.00  0.00           C  
ATOM   1388  C   ILE X  88     208.328 216.725 318.350  1.00  0.00           C  
ATOM   1389  O   ILE X  88     209.535 216.682 318.703  1.00  0.00           O  
ATOM   1390  CB  ILE X  88     206.107 217.562 319.509  1.00  0.00           C  
ATOM   1391  CG1 ILE X  88     205.511 218.892 320.182  1.00  0.00           C  
ATOM   1392  CG2 ILE X  88     206.186 216.258 320.394  1.00  0.00           C  
ATOM   1393  CD1 ILE X  88     204.923 220.135 319.342  1.00  0.00           C  
ATOM   1394  H   ILE X  88     206.552 218.899 317.210  1.00  0.00           H  
ATOM   1395  HA  ILE X  88     208.026 218.320 319.724  1.00  0.00           H  
ATOM   1396  HB  ILE X  88     205.459 217.293 318.674  1.00  0.00           H  
ATOM   1397 HG12 ILE X  88     204.632 218.605 320.760  1.00  0.00           H  
ATOM   1398 HG13 ILE X  88     206.231 219.276 320.905  1.00  0.00           H  
ATOM   1399 HG21 ILE X  88     206.480 215.407 319.778  1.00  0.00           H  
ATOM   1400 HG22 ILE X  88     205.136 216.207 320.683  1.00  0.00           H  
ATOM   1401 HG23 ILE X  88     206.753 216.374 321.317  1.00  0.00           H  
ATOM   1402 HD11 ILE X  88     205.662 220.936 319.331  1.00  0.00           H  
ATOM   1403 HD12 ILE X  88     203.979 220.432 319.799  1.00  0.00           H  
ATOM   1404 HD13 ILE X  88     204.733 219.788 318.327  1.00  0.00           H  
ATOM   1405  N   ASP X  89     207.824 215.719 317.622  1.00  0.00           N  
ATOM   1406  CA  ASP X  89     208.583 214.468 317.486  1.00  0.00           C  
ATOM   1407  C   ASP X  89     209.855 214.583 316.581  1.00  0.00           C  
ATOM   1408  O   ASP X  89     210.815 213.947 316.966  1.00  0.00           O  
ATOM   1409  CB  ASP X  89     207.706 213.415 316.829  1.00  0.00           C  
ATOM   1410  CG  ASP X  89     208.283 212.050 316.703  1.00  0.00           C  
ATOM   1411  OD1 ASP X  89     208.107 211.449 315.697  1.00  0.00           O  
ATOM   1412  OD2 ASP X  89     208.845 211.576 317.711  1.00  0.00           O1-
ATOM   1413  H   ASP X  89     206.901 215.777 317.215  1.00  0.00           H  
ATOM   1414  HA  ASP X  89     208.892 214.131 318.476  1.00  0.00           H  
ATOM   1415  HB2 ASP X  89     206.697 213.347 317.235  1.00  0.00           H  
ATOM   1416  HB3 ASP X  89     207.531 213.804 315.825  1.00  0.00           H  
ATOM   1417  N   LEU X  90     209.822 215.342 315.440  1.00  0.00           N  
ATOM   1418  CA  LEU X  90     210.963 215.635 314.564  1.00  0.00           C  
ATOM   1419  C   LEU X  90     211.656 216.908 314.909  1.00  0.00           C  
ATOM   1420  O   LEU X  90     212.793 217.066 314.366  1.00  0.00           O  
ATOM   1421  CB  LEU X  90     210.497 215.541 313.107  1.00  0.00           C  
ATOM   1422  CG  LEU X  90     209.904 214.256 312.628  1.00  0.00           C  
ATOM   1423  CD1 LEU X  90     209.571 214.432 311.175  1.00  0.00           C  
ATOM   1424  CD2 LEU X  90     210.754 212.973 312.657  1.00  0.00           C  
ATOM   1425  H   LEU X  90     208.937 215.767 315.202  1.00  0.00           H  
ATOM   1426  HA  LEU X  90     211.611 214.773 314.727  1.00  0.00           H  
ATOM   1427  HB2 LEU X  90     209.713 216.288 312.985  1.00  0.00           H  
ATOM   1428  HB3 LEU X  90     211.357 215.777 312.480  1.00  0.00           H  
ATOM   1429  HG  LEU X  90     208.938 214.091 313.106  1.00  0.00           H  
ATOM   1430 HD11 LEU X  90     209.215 213.480 310.782  1.00  0.00           H  
ATOM   1431 HD12 LEU X  90     210.527 214.613 310.682  1.00  0.00           H  
ATOM   1432 HD13 LEU X  90     208.810 215.206 311.081  1.00  0.00           H  
ATOM   1433 HD21 LEU X  90     210.929 212.704 313.698  1.00  0.00           H  
ATOM   1434 HD22 LEU X  90     210.370 212.154 312.050  1.00  0.00           H  
ATOM   1435 HD23 LEU X  90     211.713 213.231 312.206  1.00  0.00           H  
ATOM   1436  N   GLY X  91     211.233 217.719 315.960  1.00  0.00           N  
ATOM   1437  CA  GLY X  91     211.823 219.028 316.187  1.00  0.00           C  
ATOM   1438  C   GLY X  91     213.305 219.094 316.494  1.00  0.00           C  
ATOM   1439  O   GLY X  91     213.983 220.071 316.130  1.00  0.00           O  
ATOM   1440  H   GLY X  91     210.536 217.482 316.651  1.00  0.00           H  
ATOM   1441  HA2 GLY X  91     211.714 219.616 315.276  1.00  0.00           H  
ATOM   1442  HA3 GLY X  91     211.402 219.493 317.078  1.00  0.00           H  
ATOM   1443  N   GLU X  92     213.879 218.129 317.153  1.00  0.00           N  
ATOM   1444  CA  GLU X  92     215.244 218.084 317.631  1.00  0.00           C  
ATOM   1445  C   GLU X  92     216.169 217.686 316.454  1.00  0.00           C  
ATOM   1446  O   GLU X  92     217.240 218.252 316.296  1.00  0.00           O  
ATOM   1447  CB  GLU X  92     215.266 217.118 318.839  1.00  0.00           C  
ATOM   1448  CG  GLU X  92     216.595 217.187 319.609  1.00  0.00           C  
ATOM   1449  CD  GLU X  92     216.898 215.867 320.440  1.00  0.00           C  
ATOM   1450  OE1 GLU X  92     216.519 214.726 320.047  1.00  0.00           O  
ATOM   1451  OE2 GLU X  92     217.566 215.899 321.504  1.00  0.00           O1-
ATOM   1452  H   GLU X  92     213.206 217.418 317.397  1.00  0.00           H  
ATOM   1453  HA  GLU X  92     215.386 219.081 318.049  1.00  0.00           H  
ATOM   1454  HB2 GLU X  92     214.456 217.353 319.530  1.00  0.00           H  
ATOM   1455  HB3 GLU X  92     215.127 216.082 318.528  1.00  0.00           H  
ATOM   1456  HG2 GLU X  92     217.418 217.198 318.895  1.00  0.00           H  
ATOM   1457  HG3 GLU X  92     216.582 218.079 320.235  1.00  0.00           H  
ATOM   1458  N   GLU X  93     215.701 216.819 315.619  1.00  0.00           N  
ATOM   1459  CA  GLU X  93     216.272 216.351 314.365  1.00  0.00           C  
ATOM   1460  C   GLU X  93     216.211 217.453 313.283  1.00  0.00           C  
ATOM   1461  O   GLU X  93     217.296 217.749 312.762  1.00  0.00           O  
ATOM   1462  CB  GLU X  93     215.669 215.063 313.920  1.00  0.00           C  
ATOM   1463  CG  GLU X  93     216.138 214.420 312.685  1.00  0.00           C  
ATOM   1464  CD  GLU X  93     217.677 214.175 312.777  1.00  0.00           C  
ATOM   1465  OE1 GLU X  93     218.220 214.189 313.853  1.00  0.00           O  
ATOM   1466  OE2 GLU X  93     218.329 214.205 311.727  1.00  0.00           O1-
ATOM   1467  H   GLU X  93     214.834 216.388 315.905  1.00  0.00           H  
ATOM   1468  HA  GLU X  93     217.315 216.208 314.647  1.00  0.00           H  
ATOM   1469  HB2 GLU X  93     215.756 214.334 314.726  1.00  0.00           H  
ATOM   1470  HB3 GLU X  93     214.590 215.202 313.866  1.00  0.00           H  
ATOM   1471  HG2 GLU X  93     215.614 213.473 312.559  1.00  0.00           H  
ATOM   1472  HG3 GLU X  93     215.904 214.978 311.778  1.00  0.00           H  
ATOM   1473  N   PHE X  94     215.124 218.169 313.160  1.00  0.00           N  
ATOM   1474  CA  PHE X  94     214.976 219.462 312.363  1.00  0.00           C  
ATOM   1475  C   PHE X  94     215.965 220.578 312.728  1.00  0.00           C  
ATOM   1476  O   PHE X  94     215.967 221.596 312.017  1.00  0.00           O  
ATOM   1477  CB  PHE X  94     213.568 219.964 312.415  1.00  0.00           C  
ATOM   1478  CG  PHE X  94     212.506 219.227 311.601  1.00  0.00           C  
ATOM   1479  CD1 PHE X  94     212.627 217.867 311.135  1.00  0.00           C  
ATOM   1480  CD2 PHE X  94     211.409 219.947 311.085  1.00  0.00           C  
ATOM   1481  CE1 PHE X  94     211.687 217.235 310.218  1.00  0.00           C  
ATOM   1482  CE2 PHE X  94     210.533 219.330 310.170  1.00  0.00           C  
ATOM   1483  CZ  PHE X  94     210.638 217.995 309.757  1.00  0.00           C  
ATOM   1484  H   PHE X  94     214.392 217.880 313.792  1.00  0.00           H  
ATOM   1485  HA  PHE X  94     215.228 219.240 311.325  1.00  0.00           H  
ATOM   1486  HB2 PHE X  94     213.229 219.804 313.438  1.00  0.00           H  
ATOM   1487  HB3 PHE X  94     213.489 221.048 312.324  1.00  0.00           H  
ATOM   1488  HD1 PHE X  94     213.447 217.204 311.365  1.00  0.00           H  
ATOM   1489  HD2 PHE X  94     211.213 220.945 311.449  1.00  0.00           H  
ATOM   1490  HE1 PHE X  94     211.935 216.277 309.787  1.00  0.00           H  
ATOM   1491  HE2 PHE X  94     209.680 219.895 309.823  1.00  0.00           H  
ATOM   1492  HZ  PHE X  94     209.942 217.589 309.039  1.00  0.00           H  
ATOM   1493  N   SER X  95     216.701 220.513 313.809  1.00  0.00           N  
ATOM   1494  CA  SER X  95     217.587 221.554 314.343  1.00  0.00           C  
ATOM   1495  C   SER X  95     218.733 222.065 313.443  1.00  0.00           C  
ATOM   1496  O   SER X  95     219.509 222.833 313.918  1.00  0.00           O  
ATOM   1497  CB  SER X  95     218.183 221.034 315.723  1.00  0.00           C  
ATOM   1498  OG  SER X  95     219.107 219.977 315.386  1.00  0.00           O  
ATOM   1499  H   SER X  95     216.636 219.721 314.433  1.00  0.00           H  
ATOM   1500  HA  SER X  95     216.896 222.326 314.681  1.00  0.00           H  
ATOM   1501  HB2 SER X  95     218.743 221.833 316.210  1.00  0.00           H  
ATOM   1502  HB3 SER X  95     217.324 220.752 316.332  1.00  0.00           H  
ATOM   1503  HG  SER X  95     218.591 219.173 315.296  1.00  0.00           H  
ATOM   1504  N   GLY X  96     218.859 221.637 312.150  1.00  0.00           N  
ATOM   1505  CA  GLY X  96     219.931 222.158 311.219  1.00  0.00           C  
ATOM   1506  C   GLY X  96     219.759 223.676 310.919  1.00  0.00           C  
ATOM   1507  O   GLY X  96     218.699 224.069 310.353  1.00  0.00           O  
ATOM   1508  H   GLY X  96     218.194 220.947 311.833  1.00  0.00           H  
ATOM   1509  HA2 GLY X  96     220.912 221.950 311.646  1.00  0.00           H  
ATOM   1510  HA3 GLY X  96     219.821 221.682 310.245  1.00  0.00           H  
ATOM   1511  N   ARG X  97     220.731 224.524 311.417  1.00  0.00           N  
ATOM   1512  CA  ARG X  97     220.752 226.016 311.395  1.00  0.00           C  
ATOM   1513  C   ARG X  97     222.028 226.628 311.144  1.00  0.00           C  
ATOM   1514  O   ARG X  97     223.104 226.021 311.394  1.00  0.00           O  
ATOM   1515  CB  ARG X  97     220.281 226.614 312.733  1.00  0.00           C  
ATOM   1516  CG  ARG X  97     218.799 226.524 312.994  1.00  0.00           C  
ATOM   1517  CD  ARG X  97     218.104 227.670 312.233  1.00  0.00           C  
ATOM   1518  NE  ARG X  97     216.658 227.616 312.521  1.00  0.00           N  
ATOM   1519  CZ  ARG X  97     216.023 228.333 313.422  1.00  0.00           C  
ATOM   1520  NH1 ARG X  97     216.582 229.163 314.215  1.00  0.00           N1+
ATOM   1521  NH2 ARG X  97     214.724 228.220 313.504  1.00  0.00           N  
ATOM   1522  H   ARG X  97     221.519 224.032 311.813  1.00  0.00           H  
ATOM   1523  HA  ARG X  97     220.056 226.408 310.654  1.00  0.00           H  
ATOM   1524  HB2 ARG X  97     220.871 226.150 313.524  1.00  0.00           H  
ATOM   1525  HB3 ARG X  97     220.606 227.648 312.851  1.00  0.00           H  
ATOM   1526  HG2 ARG X  97     218.371 225.548 312.763  1.00  0.00           H  
ATOM   1527  HG3 ARG X  97     218.565 226.604 314.055  1.00  0.00           H  
ATOM   1528  HD2 ARG X  97     218.560 228.601 312.569  1.00  0.00           H  
ATOM   1529  HD3 ARG X  97     218.224 227.510 311.162  1.00  0.00           H  
ATOM   1530  HE  ARG X  97     216.078 227.111 311.868  1.00  0.00           H  
ATOM   1531 HH11 ARG X  97     217.587 229.108 314.300  1.00  0.00           H  
ATOM   1532 HH12 ARG X  97     216.120 229.542 315.029  1.00  0.00           H  
ATOM   1533 HH21 ARG X  97     214.328 227.373 313.122  1.00  0.00           H  
ATOM   1534 HH22 ARG X  97     214.170 228.998 313.831  1.00  0.00           H  
ATOM   1535  N   GLY X  98     222.148 227.894 310.639  1.00  0.00           N  
ATOM   1536  CA  GLY X  98     223.322 228.592 310.408  1.00  0.00           C  
ATOM   1537  C   GLY X  98     223.162 229.931 309.619  1.00  0.00           C  
ATOM   1538  O   GLY X  98     222.112 230.254 309.153  1.00  0.00           O  
ATOM   1539  H   GLY X  98     221.326 228.358 310.281  1.00  0.00           H  
ATOM   1540  HA2 GLY X  98     223.829 228.681 311.368  1.00  0.00           H  
ATOM   1541  HA3 GLY X  98     223.974 227.930 309.838  1.00  0.00           H  
ATOM   1542  N   ILE X  99     224.256 230.674 309.480  1.00  0.00           N  
ATOM   1543  CA  ILE X  99     224.499 231.848 308.593  1.00  0.00           C  
ATOM   1544  C   ILE X  99     224.589 231.507 307.106  1.00  0.00           C  
ATOM   1545  O   ILE X  99     225.186 232.209 306.355  1.00  0.00           O  
ATOM   1546  CB  ILE X  99     225.597 232.741 309.167  1.00  0.00           C  
ATOM   1547  CG1 ILE X  99     226.939 232.123 309.381  1.00  0.00           C  
ATOM   1548  CG2 ILE X  99     224.958 233.234 310.460  1.00  0.00           C  
ATOM   1549  CD1 ILE X  99     228.086 233.101 309.090  1.00  0.00           C  
ATOM   1550  H   ILE X  99     225.037 230.221 309.932  1.00  0.00           H  
ATOM   1551  HA  ILE X  99     223.560 232.393 308.692  1.00  0.00           H  
ATOM   1552  HB  ILE X  99     225.706 233.653 308.581  1.00  0.00           H  
ATOM   1553 HG12 ILE X  99     227.158 231.836 310.409  1.00  0.00           H  
ATOM   1554 HG13 ILE X  99     227.035 231.344 308.624  1.00  0.00           H  
ATOM   1555 HG21 ILE X  99     225.804 233.705 310.961  1.00  0.00           H  
ATOM   1556 HG22 ILE X  99     224.572 232.511 311.179  1.00  0.00           H  
ATOM   1557 HG23 ILE X  99     224.291 234.070 310.251  1.00  0.00           H  
ATOM   1558 HD11 ILE X  99     229.028 232.703 309.468  1.00  0.00           H  
ATOM   1559 HD12 ILE X  99     227.998 234.074 309.575  1.00  0.00           H  
ATOM   1560 HD13 ILE X  99     228.280 233.108 308.017  1.00  0.00           H  
ATOM   1561  N   PHE X 100     223.857 230.473 306.651  1.00  0.00           N  
ATOM   1562  CA  PHE X 100     223.844 229.895 305.270  1.00  0.00           C  
ATOM   1563  C   PHE X 100     223.419 230.898 304.176  1.00  0.00           C  
ATOM   1564  O   PHE X 100     223.819 230.702 303.049  1.00  0.00           O  
ATOM   1565  CB  PHE X 100     222.923 228.686 305.294  1.00  0.00           C  
ATOM   1566  CG  PHE X 100     223.289 227.513 306.280  1.00  0.00           C  
ATOM   1567  CD1 PHE X 100     222.240 226.846 306.880  1.00  0.00           C  
ATOM   1568  CD2 PHE X 100     224.634 227.048 306.423  1.00  0.00           C  
ATOM   1569  CE1 PHE X 100     222.494 225.761 307.736  1.00  0.00           C  
ATOM   1570  CE2 PHE X 100     224.856 225.852 307.144  1.00  0.00           C  
ATOM   1571  CZ  PHE X 100     223.810 225.270 307.873  1.00  0.00           C  
ATOM   1572  H   PHE X 100     223.414 229.897 307.352  1.00  0.00           H  
ATOM   1573  HA  PHE X 100     224.850 229.492 305.156  1.00  0.00           H  
ATOM   1574  HB2 PHE X 100     221.890 228.928 305.543  1.00  0.00           H  
ATOM   1575  HB3 PHE X 100     222.882 228.231 304.305  1.00  0.00           H  
ATOM   1576  HD1 PHE X 100     221.209 227.073 306.653  1.00  0.00           H  
ATOM   1577  HD2 PHE X 100     225.484 227.559 305.995  1.00  0.00           H  
ATOM   1578  HE1 PHE X 100     221.638 225.300 308.206  1.00  0.00           H  
ATOM   1579  HE2 PHE X 100     225.859 225.466 307.245  1.00  0.00           H  
ATOM   1580  HZ  PHE X 100     223.978 224.424 308.524  1.00  0.00           H  
ATOM   1581  N   PRO X 101     222.640 231.902 304.532  1.00  0.00           N  
ATOM   1582  CA  PRO X 101     222.293 232.934 303.575  1.00  0.00           C  
ATOM   1583  C   PRO X 101     223.486 233.849 303.277  1.00  0.00           C  
ATOM   1584  O   PRO X 101     223.775 234.066 302.085  1.00  0.00           O  
ATOM   1585  CB  PRO X 101     220.951 233.611 303.968  1.00  0.00           C  
ATOM   1586  CG  PRO X 101     220.510 232.650 305.014  1.00  0.00           C  
ATOM   1587  CD  PRO X 101     221.769 232.078 305.649  1.00  0.00           C  
ATOM   1588  HA  PRO X 101     222.024 232.445 302.639  1.00  0.00           H  
ATOM   1589  HB2 PRO X 101     221.240 234.584 304.366  1.00  0.00           H  
ATOM   1590  HB3 PRO X 101     220.336 233.688 303.072  1.00  0.00           H  
ATOM   1591  HG2 PRO X 101     219.886 233.110 305.779  1.00  0.00           H  
ATOM   1592  HG3 PRO X 101     219.909 231.843 304.594  1.00  0.00           H  
ATOM   1593  HD2 PRO X 101     222.226 232.813 306.312  1.00  0.00           H  
ATOM   1594  HD3 PRO X 101     221.551 231.087 306.048  1.00  0.00           H  
ATOM   1595  N   LEU X 102     224.249 234.234 304.323  1.00  0.00           N  
ATOM   1596  CA  LEU X 102     225.457 235.002 304.169  1.00  0.00           C  
ATOM   1597  C   LEU X 102     226.684 234.160 303.700  1.00  0.00           C  
ATOM   1598  O   LEU X 102     227.454 234.695 302.912  1.00  0.00           O  
ATOM   1599  CB  LEU X 102     225.834 235.581 305.636  1.00  0.00           C  
ATOM   1600  CG  LEU X 102     224.853 236.199 306.561  1.00  0.00           C  
ATOM   1601  CD1 LEU X 102     225.470 236.773 307.828  1.00  0.00           C  
ATOM   1602  CD2 LEU X 102     223.924 237.296 305.997  1.00  0.00           C  
ATOM   1603  H   LEU X 102     223.980 233.937 305.250  1.00  0.00           H  
ATOM   1604  HA  LEU X 102     225.338 235.842 303.485  1.00  0.00           H  
ATOM   1605  HB2 LEU X 102     226.248 234.810 306.286  1.00  0.00           H  
ATOM   1606  HB3 LEU X 102     226.687 236.257 305.567  1.00  0.00           H  
ATOM   1607  HG  LEU X 102     224.201 235.364 306.815  1.00  0.00           H  
ATOM   1608 HD11 LEU X 102     226.240 236.119 308.238  1.00  0.00           H  
ATOM   1609 HD12 LEU X 102     224.710 236.950 308.589  1.00  0.00           H  
ATOM   1610 HD13 LEU X 102     225.908 237.730 307.546  1.00  0.00           H  
ATOM   1611 HD21 LEU X 102     223.085 237.424 306.682  1.00  0.00           H  
ATOM   1612 HD22 LEU X 102     224.404 238.259 305.824  1.00  0.00           H  
ATOM   1613 HD23 LEU X 102     223.616 236.937 305.014  1.00  0.00           H  
ATOM   1614  N   ALA X 103     226.838 232.882 304.099  1.00  0.00           N  
ATOM   1615  CA  ALA X 103     227.972 232.089 303.640  1.00  0.00           C  
ATOM   1616  C   ALA X 103     229.430 232.596 303.819  1.00  0.00           C  
ATOM   1617  O   ALA X 103     230.365 232.072 303.135  1.00  0.00           O  
ATOM   1618  CB  ALA X 103     227.728 231.607 302.226  1.00  0.00           C  
ATOM   1619  H   ALA X 103     226.241 232.383 304.744  1.00  0.00           H  
ATOM   1620  HA  ALA X 103     228.112 231.254 304.327  1.00  0.00           H  
ATOM   1621  HB1 ALA X 103     226.796 231.046 302.164  1.00  0.00           H  
ATOM   1622  HB2 ALA X 103     228.561 230.945 301.988  1.00  0.00           H  
ATOM   1623  HB3 ALA X 103     227.912 232.343 301.443  1.00  0.00           H  
ATOM   1624  N   GLU X 104     229.622 233.525 304.748  1.00  0.00           N  
ATOM   1625  CA  GLU X 104     230.930 234.009 305.195  1.00  0.00           C  
ATOM   1626  C   GLU X 104     231.627 232.991 306.150  1.00  0.00           C  
ATOM   1627  O   GLU X 104     230.877 232.326 306.857  1.00  0.00           O  
ATOM   1628  CB  GLU X 104     230.688 235.424 305.935  1.00  0.00           C  
ATOM   1629  CG  GLU X 104     231.784 236.004 306.791  1.00  0.00           C  
ATOM   1630  CD  GLU X 104     233.094 236.424 305.949  1.00  0.00           C  
ATOM   1631  OE1 GLU X 104     233.494 237.549 305.963  1.00  0.00           O  
ATOM   1632  OE2 GLU X 104     233.670 235.529 305.278  1.00  0.00           O1-
ATOM   1633  H   GLU X 104     228.768 233.814 305.203  1.00  0.00           H  
ATOM   1634  HA  GLU X 104     231.544 234.168 304.309  1.00  0.00           H  
ATOM   1635  HB2 GLU X 104     230.346 236.108 305.158  1.00  0.00           H  
ATOM   1636  HB3 GLU X 104     229.858 235.288 306.628  1.00  0.00           H  
ATOM   1637  HG2 GLU X 104     231.384 236.749 307.479  1.00  0.00           H  
ATOM   1638  HG3 GLU X 104     232.078 235.230 307.499  1.00  0.00           H  
ATOM   1639  N   ARG X 105     232.918 232.953 306.331  1.00  0.00           N  
ATOM   1640  CA  ARG X 105     233.642 231.947 307.107  1.00  0.00           C  
ATOM   1641  C   ARG X 105     233.510 232.085 308.645  1.00  0.00           C  
ATOM   1642  O   ARG X 105     234.039 231.278 309.350  1.00  0.00           O  
ATOM   1643  CB  ARG X 105     235.102 231.984 306.699  1.00  0.00           C  
ATOM   1644  CG  ARG X 105     235.314 231.520 305.271  1.00  0.00           C  
ATOM   1645  CD  ARG X 105     236.754 231.815 304.933  1.00  0.00           C  
ATOM   1646  NE  ARG X 105     236.940 233.255 304.694  1.00  0.00           N  
ATOM   1647  CZ  ARG X 105     238.131 233.826 304.787  1.00  0.00           C  
ATOM   1648  NH1 ARG X 105     239.283 233.251 305.126  1.00  0.00           N1+
ATOM   1649  NH2 ARG X 105     238.307 235.103 304.608  1.00  0.00           N  
ATOM   1650  H   ARG X 105     233.522 233.636 305.897  1.00  0.00           H  
ATOM   1651  HA  ARG X 105     233.212 230.981 306.844  1.00  0.00           H  
ATOM   1652  HB2 ARG X 105     235.484 232.979 306.927  1.00  0.00           H  
ATOM   1653  HB3 ARG X 105     235.641 231.370 307.421  1.00  0.00           H  
ATOM   1654  HG2 ARG X 105     235.181 230.442 305.176  1.00  0.00           H  
ATOM   1655  HG3 ARG X 105     234.625 232.046 304.610  1.00  0.00           H  
ATOM   1656  HD2 ARG X 105     237.397 231.514 305.759  1.00  0.00           H  
ATOM   1657  HD3 ARG X 105     236.988 231.196 304.067  1.00  0.00           H  
ATOM   1658  HE  ARG X 105     236.103 233.780 304.482  1.00  0.00           H  
ATOM   1659 HH11 ARG X 105     239.208 232.255 304.973  1.00  0.00           H  
ATOM   1660 HH12 ARG X 105     240.118 233.814 305.201  1.00  0.00           H  
ATOM   1661 HH21 ARG X 105     237.523 235.719 304.446  1.00  0.00           H  
ATOM   1662 HH22 ARG X 105     239.227 235.459 304.822  1.00  0.00           H  
ATOM   1663  N   ALA X 106     233.037 233.211 309.082  1.00  0.00           N  
ATOM   1664  CA  ALA X 106     233.142 233.715 310.460  1.00  0.00           C  
ATOM   1665  C   ALA X 106     232.203 232.865 311.323  1.00  0.00           C  
ATOM   1666  O   ALA X 106     231.269 232.135 310.935  1.00  0.00           O  
ATOM   1667  CB  ALA X 106     232.773 235.209 310.475  1.00  0.00           C  
ATOM   1668  H   ALA X 106     232.705 233.836 308.362  1.00  0.00           H  
ATOM   1669  HA  ALA X 106     234.183 233.632 310.773  1.00  0.00           H  
ATOM   1670  HB1 ALA X 106     233.357 235.905 309.874  1.00  0.00           H  
ATOM   1671  HB2 ALA X 106     232.877 235.596 311.488  1.00  0.00           H  
ATOM   1672  HB3 ALA X 106     231.715 235.344 310.253  1.00  0.00           H  
ATOM   1673  N   ASN X 107     232.519 232.745 312.641  1.00  0.00           N  
ATOM   1674  CA  ASN X 107     231.821 231.911 313.631  1.00  0.00           C  
ATOM   1675  C   ASN X 107     230.602 232.598 314.296  1.00  0.00           C  
ATOM   1676  O   ASN X 107     230.865 233.635 314.922  1.00  0.00           O  
ATOM   1677  CB  ASN X 107     232.840 231.424 314.662  1.00  0.00           C  
ATOM   1678  CG  ASN X 107     233.977 230.564 314.087  1.00  0.00           C  
ATOM   1679  ND2 ASN X 107     235.138 230.811 314.635  1.00  0.00           N  
ATOM   1680  OD1 ASN X 107     233.847 229.702 313.182  1.00  0.00           O  
ATOM   1681  H   ASN X 107     233.293 233.328 312.927  1.00  0.00           H  
ATOM   1682  HA  ASN X 107     231.374 231.065 313.108  1.00  0.00           H  
ATOM   1683  HB2 ASN X 107     233.266 232.269 315.203  1.00  0.00           H  
ATOM   1684  HB3 ASN X 107     232.318 230.937 315.486  1.00  0.00           H  
ATOM   1685 HD21 ASN X 107     235.154 231.293 315.522  1.00  0.00           H  
ATOM   1686 HD22 ASN X 107     235.791 230.153 314.233  1.00  0.00           H  
ATOM   1687  N   ARG X 108     229.440 231.998 314.119  1.00  0.00           N  
ATOM   1688  CA  ARG X 108     228.161 232.557 314.615  1.00  0.00           C  
ATOM   1689  C   ARG X 108     227.217 231.403 315.115  1.00  0.00           C  
ATOM   1690  O   ARG X 108     226.479 231.707 316.020  1.00  0.00           O  
ATOM   1691  CB  ARG X 108     227.468 233.227 313.382  1.00  0.00           C  
ATOM   1692  CG  ARG X 108     228.054 234.587 313.073  1.00  0.00           C  
ATOM   1693  CD  ARG X 108     227.701 235.721 314.048  1.00  0.00           C  
ATOM   1694  NE  ARG X 108     226.258 235.933 314.178  1.00  0.00           N  
ATOM   1695  CZ  ARG X 108     225.390 235.688 315.161  1.00  0.00           C  
ATOM   1696  NH1 ARG X 108     225.764 235.227 316.359  1.00  0.00           N1+
ATOM   1697  NH2 ARG X 108     224.106 235.871 315.043  1.00  0.00           N  
ATOM   1698  H   ARG X 108     229.388 231.058 313.752  1.00  0.00           H  
ATOM   1699  HA  ARG X 108     228.418 233.295 315.375  1.00  0.00           H  
ATOM   1700  HB2 ARG X 108     227.649 232.523 312.570  1.00  0.00           H  
ATOM   1701  HB3 ARG X 108     226.409 233.482 313.410  1.00  0.00           H  
ATOM   1702  HG2 ARG X 108     229.140 234.508 313.024  1.00  0.00           H  
ATOM   1703  HG3 ARG X 108     227.576 234.847 312.129  1.00  0.00           H  
ATOM   1704  HD2 ARG X 108     228.151 235.451 315.003  1.00  0.00           H  
ATOM   1705  HD3 ARG X 108     228.103 236.663 313.676  1.00  0.00           H  
ATOM   1706  HE  ARG X 108     225.832 236.338 313.357  1.00  0.00           H  
ATOM   1707 HH11 ARG X 108     226.694 235.012 316.689  1.00  0.00           H  
ATOM   1708 HH12 ARG X 108     225.012 235.038 317.006  1.00  0.00           H  
ATOM   1709 HH21 ARG X 108     223.720 236.329 314.230  1.00  0.00           H  
ATOM   1710 HH22 ARG X 108     223.565 235.552 315.834  1.00  0.00           H  
ATOM   1711  N   GLY X 109     227.522 230.168 314.607  1.00  0.00           N  
ATOM   1712  CA  GLY X 109     226.767 228.972 315.052  1.00  0.00           C  
ATOM   1713  C   GLY X 109     227.101 228.402 316.439  1.00  0.00           C  
ATOM   1714  O   GLY X 109     226.643 227.326 316.881  1.00  0.00           O  
ATOM   1715  H   GLY X 109     228.231 229.941 313.925  1.00  0.00           H  
ATOM   1716  HA2 GLY X 109     225.704 229.134 314.872  1.00  0.00           H  
ATOM   1717  HA3 GLY X 109     226.942 228.190 314.313  1.00  0.00           H  
ATOM   1718  N   PHE X 110     227.864 229.201 317.147  1.00  0.00           N  
ATOM   1719  CA  PHE X 110     228.158 229.026 318.591  1.00  0.00           C  
ATOM   1720  C   PHE X 110     227.171 229.617 319.642  1.00  0.00           C  
ATOM   1721  O   PHE X 110     227.266 229.234 320.806  1.00  0.00           O  
ATOM   1722  CB  PHE X 110     229.613 229.366 318.970  1.00  0.00           C  
ATOM   1723  CG  PHE X 110     230.822 228.727 318.265  1.00  0.00           C  
ATOM   1724  CD1 PHE X 110     232.094 229.349 318.250  1.00  0.00           C  
ATOM   1725  CD2 PHE X 110     230.689 227.475 317.582  1.00  0.00           C  
ATOM   1726  CE1 PHE X 110     233.224 228.668 317.682  1.00  0.00           C  
ATOM   1727  CE2 PHE X 110     231.766 226.939 316.853  1.00  0.00           C  
ATOM   1728  CZ  PHE X 110     233.033 227.528 316.866  1.00  0.00           C  
ATOM   1729  H   PHE X 110     228.179 230.039 316.680  1.00  0.00           H  
ATOM   1730  HA  PHE X 110     228.045 227.972 318.843  1.00  0.00           H  
ATOM   1731  HB2 PHE X 110     229.748 230.447 318.997  1.00  0.00           H  
ATOM   1732  HB3 PHE X 110     229.594 229.156 320.040  1.00  0.00           H  
ATOM   1733  HD1 PHE X 110     232.274 230.239 318.835  1.00  0.00           H  
ATOM   1734  HD2 PHE X 110     229.707 227.057 317.416  1.00  0.00           H  
ATOM   1735  HE1 PHE X 110     234.216 229.094 317.706  1.00  0.00           H  
ATOM   1736  HE2 PHE X 110     231.640 225.939 316.464  1.00  0.00           H  
ATOM   1737  HZ  PHE X 110     233.865 227.094 316.331  1.00  0.00           H  
ATOM   1738  N   GLY X 111     226.225 230.465 319.222  1.00  0.00           N  
ATOM   1739  CA  GLY X 111     225.154 230.946 320.118  1.00  0.00           C  
ATOM   1740  C   GLY X 111     223.895 230.022 320.241  1.00  0.00           C  
ATOM   1741  O   GLY X 111     224.026 229.006 320.944  1.00  0.00           O  
ATOM   1742  H   GLY X 111     226.007 230.617 318.247  1.00  0.00           H  
ATOM   1743  HA2 GLY X 111     225.585 231.036 321.115  1.00  0.00           H  
ATOM   1744  HA3 GLY X 111     224.938 231.974 319.827  1.00  0.00           H  
ATOM   1745  N   ILE X 112     222.696 230.434 319.751  1.00  0.00           N  
ATOM   1746  CA  ILE X 112     221.402 229.770 320.033  1.00  0.00           C  
ATOM   1747  C   ILE X 112     220.516 229.733 318.782  1.00  0.00           C  
ATOM   1748  O   ILE X 112     220.149 228.611 318.418  1.00  0.00           O  
ATOM   1749  CB  ILE X 112     220.709 230.352 321.293  1.00  0.00           C  
ATOM   1750  CG1 ILE X 112     219.388 229.488 321.605  1.00  0.00           C  
ATOM   1751  CG2 ILE X 112     220.409 231.822 321.267  1.00  0.00           C  
ATOM   1752  CD1 ILE X 112     218.890 229.674 323.052  1.00  0.00           C  
ATOM   1753  H   ILE X 112     222.646 231.330 319.288  1.00  0.00           H  
ATOM   1754  HA  ILE X 112     221.625 228.713 320.181  1.00  0.00           H  
ATOM   1755  HB  ILE X 112     221.417 230.096 322.081  1.00  0.00           H  
ATOM   1756 HG12 ILE X 112     218.609 229.815 320.916  1.00  0.00           H  
ATOM   1757 HG13 ILE X 112     219.664 228.444 321.460  1.00  0.00           H  
ATOM   1758 HG21 ILE X 112     219.943 232.193 322.180  1.00  0.00           H  
ATOM   1759 HG22 ILE X 112     219.611 231.973 320.540  1.00  0.00           H  
ATOM   1760 HG23 ILE X 112     221.273 232.440 321.021  1.00  0.00           H  
ATOM   1761 HD11 ILE X 112     219.622 229.208 323.711  1.00  0.00           H  
ATOM   1762 HD12 ILE X 112     217.928 229.165 323.105  1.00  0.00           H  
ATOM   1763 HD13 ILE X 112     218.823 230.708 323.390  1.00  0.00           H  
ATOM   1764  N   VAL X 113     220.227 230.842 318.144  1.00  0.00           N  
ATOM   1765  CA  VAL X 113     219.380 230.899 316.931  1.00  0.00           C  
ATOM   1766  C   VAL X 113     220.009 230.151 315.695  1.00  0.00           C  
ATOM   1767  O   VAL X 113     219.350 229.513 314.889  1.00  0.00           O  
ATOM   1768  CB  VAL X 113     219.037 232.340 316.482  1.00  0.00           C  
ATOM   1769  CG1 VAL X 113     218.333 232.497 315.133  1.00  0.00           C  
ATOM   1770  CG2 VAL X 113     218.177 233.042 317.491  1.00  0.00           C  
ATOM   1771  H   VAL X 113     220.761 231.618 318.509  1.00  0.00           H  
ATOM   1772  HA  VAL X 113     218.473 230.347 317.175  1.00  0.00           H  
ATOM   1773  HB  VAL X 113     219.918 232.981 316.443  1.00  0.00           H  
ATOM   1774 HG11 VAL X 113     217.316 232.116 315.229  1.00  0.00           H  
ATOM   1775 HG12 VAL X 113     218.198 233.562 314.942  1.00  0.00           H  
ATOM   1776 HG13 VAL X 113     218.791 231.902 314.344  1.00  0.00           H  
ATOM   1777 HG21 VAL X 113     218.580 232.974 318.502  1.00  0.00           H  
ATOM   1778 HG22 VAL X 113     217.196 232.568 317.505  1.00  0.00           H  
ATOM   1779 HG23 VAL X 113     218.144 234.113 317.292  1.00  0.00           H  
ATOM   1780  N   PHE X 114     221.306 230.265 315.563  1.00  0.00           N  
ATOM   1781  CA  PHE X 114     222.106 229.807 314.376  1.00  0.00           C  
ATOM   1782  C   PHE X 114     223.008 228.594 314.716  1.00  0.00           C  
ATOM   1783  O   PHE X 114     223.389 227.856 313.837  1.00  0.00           O  
ATOM   1784  CB  PHE X 114     222.708 230.983 313.653  1.00  0.00           C  
ATOM   1785  CG  PHE X 114     221.803 232.150 313.274  1.00  0.00           C  
ATOM   1786  CD1 PHE X 114     221.052 231.949 312.115  1.00  0.00           C  
ATOM   1787  CD2 PHE X 114     221.953 233.409 313.893  1.00  0.00           C  
ATOM   1788  CE1 PHE X 114     220.077 232.995 311.779  1.00  0.00           C  
ATOM   1789  CE2 PHE X 114     221.191 234.502 313.388  1.00  0.00           C  
ATOM   1790  CZ  PHE X 114     220.278 234.259 312.351  1.00  0.00           C  
ATOM   1791  H   PHE X 114     221.922 230.748 316.201  1.00  0.00           H  
ATOM   1792  HA  PHE X 114     221.414 229.429 313.623  1.00  0.00           H  
ATOM   1793  HB2 PHE X 114     223.591 231.351 314.175  1.00  0.00           H  
ATOM   1794  HB3 PHE X 114     223.076 230.648 312.683  1.00  0.00           H  
ATOM   1795  HD1 PHE X 114     220.922 230.956 311.711  1.00  0.00           H  
ATOM   1796  HD2 PHE X 114     222.535 233.569 314.789  1.00  0.00           H  
ATOM   1797  HE1 PHE X 114     219.450 232.735 310.939  1.00  0.00           H  
ATOM   1798  HE2 PHE X 114     221.343 235.492 313.792  1.00  0.00           H  
ATOM   1799  HZ  PHE X 114     219.629 235.061 312.030  1.00  0.00           H  
ATOM   1800  N   SER X 115     223.113 228.330 315.987  1.00  0.00           N  
ATOM   1801  CA  SER X 115     223.478 227.016 316.552  1.00  0.00           C  
ATOM   1802  C   SER X 115     222.466 225.958 316.058  1.00  0.00           C  
ATOM   1803  O   SER X 115     221.238 226.084 315.929  1.00  0.00           O  
ATOM   1804  CB  SER X 115     223.742 227.086 318.073  1.00  0.00           C  
ATOM   1805  OG  SER X 115     224.202 225.823 318.591  1.00  0.00           O  
ATOM   1806  H   SER X 115     222.627 228.948 316.620  1.00  0.00           H  
ATOM   1807  HA  SER X 115     224.396 226.652 316.090  1.00  0.00           H  
ATOM   1808  HB2 SER X 115     224.442 227.914 318.184  1.00  0.00           H  
ATOM   1809  HB3 SER X 115     222.799 227.411 318.513  1.00  0.00           H  
ATOM   1810  HG  SER X 115     224.617 225.999 319.438  1.00  0.00           H  
ATOM   1811  N   ASN X 116     223.057 224.726 315.974  1.00  0.00           N  
ATOM   1812  CA  ASN X 116     222.343 223.431 315.574  1.00  0.00           C  
ATOM   1813  C   ASN X 116     222.850 222.249 316.444  1.00  0.00           C  
ATOM   1814  O   ASN X 116     224.050 222.187 316.753  1.00  0.00           O  
ATOM   1815  CB  ASN X 116     222.597 223.090 314.117  1.00  0.00           C  
ATOM   1816  CG  ASN X 116     224.081 223.006 313.761  1.00  0.00           C  
ATOM   1817  ND2 ASN X 116     224.749 224.020 313.295  1.00  0.00           N  
ATOM   1818  OD1 ASN X 116     224.682 221.951 313.978  1.00  0.00           O  
ATOM   1819  H   ASN X 116     224.055 224.690 316.122  1.00  0.00           H  
ATOM   1820  HA  ASN X 116     221.254 223.465 315.563  1.00  0.00           H  
ATOM   1821  HB2 ASN X 116     222.119 222.156 313.823  1.00  0.00           H  
ATOM   1822  HB3 ASN X 116     222.108 223.806 313.458  1.00  0.00           H  
ATOM   1823 HD21 ASN X 116     224.320 224.926 313.170  1.00  0.00           H  
ATOM   1824 HD22 ASN X 116     225.651 223.813 312.892  1.00  0.00           H  
ATOM   1825  N   GLY X 117     222.094 221.162 316.657  1.00  0.00           N  
ATOM   1826  CA  GLY X 117     222.479 219.925 317.382  1.00  0.00           C  
ATOM   1827  C   GLY X 117     222.612 219.908 318.912  1.00  0.00           C  
ATOM   1828  O   GLY X 117     221.861 220.657 319.664  1.00  0.00           O  
ATOM   1829  H   GLY X 117     221.157 221.205 316.282  1.00  0.00           H  
ATOM   1830  HA2 GLY X 117     221.816 219.116 317.074  1.00  0.00           H  
ATOM   1831  HA3 GLY X 117     223.489 219.700 317.040  1.00  0.00           H  
ATOM   1832  N   LYS X 118     223.524 219.145 319.531  1.00  0.00           N  
ATOM   1833  CA  LYS X 118     223.624 219.228 320.974  1.00  0.00           C  
ATOM   1834  C   LYS X 118     223.941 220.588 321.591  1.00  0.00           C  
ATOM   1835  O   LYS X 118     223.289 220.922 322.577  1.00  0.00           O  
ATOM   1836  CB  LYS X 118     224.583 218.178 321.379  1.00  0.00           C  
ATOM   1837  CG  LYS X 118     224.036 216.775 321.397  1.00  0.00           C  
ATOM   1838  CD  LYS X 118     224.837 215.734 322.214  1.00  0.00           C  
ATOM   1839  CE  LYS X 118     226.261 215.650 321.749  1.00  0.00           C  
ATOM   1840  NZ  LYS X 118     227.195 215.271 322.799  1.00  0.00           N1+
ATOM   1841  H   LYS X 118     224.150 218.537 319.022  1.00  0.00           H  
ATOM   1842  HA  LYS X 118     222.686 218.934 321.444  1.00  0.00           H  
ATOM   1843  HB2 LYS X 118     225.514 218.222 320.813  1.00  0.00           H  
ATOM   1844  HB3 LYS X 118     224.823 218.444 322.408  1.00  0.00           H  
ATOM   1845  HG2 LYS X 118     223.078 216.866 321.910  1.00  0.00           H  
ATOM   1846  HG3 LYS X 118     224.004 216.330 320.402  1.00  0.00           H  
ATOM   1847  HD2 LYS X 118     224.873 216.146 323.223  1.00  0.00           H  
ATOM   1848  HD3 LYS X 118     224.292 214.791 322.259  1.00  0.00           H  
ATOM   1849  HE2 LYS X 118     226.379 214.891 320.976  1.00  0.00           H  
ATOM   1850  HE3 LYS X 118     226.554 216.640 321.399  1.00  0.00           H  
ATOM   1851  HZ1 LYS X 118     228.149 215.118 322.503  1.00  0.00           H  
ATOM   1852  HZ2 LYS X 118     226.796 214.444 323.219  1.00  0.00           H  
ATOM   1853  HZ3 LYS X 118     227.167 215.949 323.547  1.00  0.00           H  
ATOM   1854  N   LYS X 119     224.810 221.293 320.888  1.00  0.00           N  
ATOM   1855  CA  LYS X 119     225.200 222.620 321.273  1.00  0.00           C  
ATOM   1856  C   LYS X 119     223.997 223.562 321.477  1.00  0.00           C  
ATOM   1857  O   LYS X 119     223.861 224.239 322.487  1.00  0.00           O  
ATOM   1858  CB  LYS X 119     226.209 223.220 320.287  1.00  0.00           C  
ATOM   1859  CG  LYS X 119     227.540 222.486 320.222  1.00  0.00           C  
ATOM   1860  CD  LYS X 119     228.253 223.009 318.950  1.00  0.00           C  
ATOM   1861  CE  LYS X 119     229.651 222.504 318.874  1.00  0.00           C  
ATOM   1862  NZ  LYS X 119     230.465 223.014 319.966  1.00  0.00           N1+
ATOM   1863  H   LYS X 119     225.316 220.884 320.115  1.00  0.00           H  
ATOM   1864  HA  LYS X 119     225.749 222.540 322.211  1.00  0.00           H  
ATOM   1865  HB2 LYS X 119     225.668 223.299 319.344  1.00  0.00           H  
ATOM   1866  HB3 LYS X 119     226.443 224.206 320.690  1.00  0.00           H  
ATOM   1867  HG2 LYS X 119     228.026 222.747 321.162  1.00  0.00           H  
ATOM   1868  HG3 LYS X 119     227.379 221.413 320.121  1.00  0.00           H  
ATOM   1869  HD2 LYS X 119     227.730 222.573 318.099  1.00  0.00           H  
ATOM   1870  HD3 LYS X 119     228.187 224.097 318.917  1.00  0.00           H  
ATOM   1871  HE2 LYS X 119     229.598 221.417 318.945  1.00  0.00           H  
ATOM   1872  HE3 LYS X 119     230.049 222.932 317.954  1.00  0.00           H  
ATOM   1873  HZ1 LYS X 119     231.446 222.876 319.765  1.00  0.00           H  
ATOM   1874  HZ2 LYS X 119     230.300 222.449 320.787  1.00  0.00           H  
ATOM   1875  HZ3 LYS X 119     230.280 223.944 320.314  1.00  0.00           H  
ATOM   1876  N   TRP X 120     223.031 223.408 320.591  1.00  0.00           N  
ATOM   1877  CA  TRP X 120     221.756 224.071 320.592  1.00  0.00           C  
ATOM   1878  C   TRP X 120     220.804 223.659 321.664  1.00  0.00           C  
ATOM   1879  O   TRP X 120     220.237 224.570 322.342  1.00  0.00           O  
ATOM   1880  CB  TRP X 120     221.147 224.107 319.150  1.00  0.00           C  
ATOM   1881  CG  TRP X 120     219.679 224.427 319.142  1.00  0.00           C  
ATOM   1882  CD1 TRP X 120     219.196 225.603 319.434  1.00  0.00           C  
ATOM   1883  CD2 TRP X 120     218.572 223.496 319.000  1.00  0.00           C  
ATOM   1884  CE2 TRP X 120     217.360 224.260 319.134  1.00  0.00           C  
ATOM   1885  CE3 TRP X 120     218.412 222.043 318.921  1.00  0.00           C  
ATOM   1886  NE1 TRP X 120     217.845 225.527 319.397  1.00  0.00           N  
ATOM   1887  CZ2 TRP X 120     216.108 223.753 319.226  1.00  0.00           C  
ATOM   1888  CZ3 TRP X 120     217.084 221.614 318.861  1.00  0.00           C  
ATOM   1889  CH2 TRP X 120     215.953 222.429 318.971  1.00  0.00           C  
ATOM   1890  H   TRP X 120     223.229 222.808 319.802  1.00  0.00           H  
ATOM   1891  HA  TRP X 120     221.954 225.117 320.826  1.00  0.00           H  
ATOM   1892  HB2 TRP X 120     221.662 224.844 318.533  1.00  0.00           H  
ATOM   1893  HB3 TRP X 120     221.265 223.131 318.680  1.00  0.00           H  
ATOM   1894  HD1 TRP X 120     219.759 226.497 319.657  1.00  0.00           H  
ATOM   1895  HE1 TRP X 120     217.323 226.338 319.698  1.00  0.00           H  
ATOM   1896  HE3 TRP X 120     219.218 221.325 318.966  1.00  0.00           H  
ATOM   1897  HZ2 TRP X 120     215.213 224.305 319.472  1.00  0.00           H  
ATOM   1898  HZ3 TRP X 120     216.927 220.570 318.631  1.00  0.00           H  
ATOM   1899  HH2 TRP X 120     214.990 221.955 319.091  1.00  0.00           H  
ATOM   1900  N   LYS X 121     220.561 222.357 321.855  1.00  0.00           N  
ATOM   1901  CA  LYS X 121     219.576 221.739 322.853  1.00  0.00           C  
ATOM   1902  C   LYS X 121     220.030 222.120 324.283  1.00  0.00           C  
ATOM   1903  O   LYS X 121     219.203 222.499 325.164  1.00  0.00           O  
ATOM   1904  CB  LYS X 121     219.528 220.240 322.525  1.00  0.00           C  
ATOM   1905  CG  LYS X 121     218.575 219.345 323.204  1.00  0.00           C  
ATOM   1906  CD  LYS X 121     218.861 219.167 324.722  1.00  0.00           C  
ATOM   1907  CE  LYS X 121     220.115 218.266 324.819  1.00  0.00           C  
ATOM   1908  NZ  LYS X 121     220.319 217.796 326.171  1.00  0.00           N1+
ATOM   1909  H   LYS X 121     221.127 221.674 321.372  1.00  0.00           H  
ATOM   1910  HA  LYS X 121     218.619 222.225 322.662  1.00  0.00           H  
ATOM   1911  HB2 LYS X 121     219.526 220.105 321.444  1.00  0.00           H  
ATOM   1912  HB3 LYS X 121     220.544 219.892 322.710  1.00  0.00           H  
ATOM   1913  HG2 LYS X 121     217.556 219.706 323.066  1.00  0.00           H  
ATOM   1914  HG3 LYS X 121     218.741 218.369 322.749  1.00  0.00           H  
ATOM   1915  HD2 LYS X 121     218.869 220.071 325.331  1.00  0.00           H  
ATOM   1916  HD3 LYS X 121     217.976 218.697 325.151  1.00  0.00           H  
ATOM   1917  HE2 LYS X 121     219.898 217.387 324.211  1.00  0.00           H  
ATOM   1918  HE3 LYS X 121     221.008 218.821 324.532  1.00  0.00           H  
ATOM   1919  HZ1 LYS X 121     221.028 217.114 326.399  1.00  0.00           H  
ATOM   1920  HZ2 LYS X 121     219.439 217.532 326.591  1.00  0.00           H  
ATOM   1921  HZ3 LYS X 121     220.596 218.568 326.761  1.00  0.00           H  
ATOM   1922  N   GLU X 122     221.359 222.230 324.447  1.00  0.00           N  
ATOM   1923  CA  GLU X 122     222.047 222.528 325.712  1.00  0.00           C  
ATOM   1924  C   GLU X 122     222.122 224.049 326.144  1.00  0.00           C  
ATOM   1925  O   GLU X 122     221.749 224.358 327.327  1.00  0.00           O  
ATOM   1926  CB  GLU X 122     223.356 221.753 325.793  1.00  0.00           C  
ATOM   1927  CG  GLU X 122     223.262 220.193 325.860  1.00  0.00           C  
ATOM   1928  CD  GLU X 122     222.798 219.799 327.247  1.00  0.00           C  
ATOM   1929  OE1 GLU X 122     221.558 219.871 327.503  1.00  0.00           O  
ATOM   1930  OE2 GLU X 122     223.681 219.314 327.987  1.00  0.00           O1-
ATOM   1931  H   GLU X 122     221.872 222.220 323.577  1.00  0.00           H  
ATOM   1932  HA  GLU X 122     221.325 222.150 326.436  1.00  0.00           H  
ATOM   1933  HB2 GLU X 122     223.809 221.984 324.829  1.00  0.00           H  
ATOM   1934  HB3 GLU X 122     223.907 222.135 326.653  1.00  0.00           H  
ATOM   1935  HG2 GLU X 122     222.596 219.754 325.117  1.00  0.00           H  
ATOM   1936  HG3 GLU X 122     224.216 219.745 325.580  1.00  0.00           H  
ATOM   1937  N   ILE X 123     222.492 224.926 325.191  1.00  0.00           N  
ATOM   1938  CA  ILE X 123     222.341 226.423 325.438  1.00  0.00           C  
ATOM   1939  C   ILE X 123     220.849 226.822 325.559  1.00  0.00           C  
ATOM   1940  O   ILE X 123     220.628 227.650 326.437  1.00  0.00           O  
ATOM   1941  CB  ILE X 123     223.144 227.068 324.275  1.00  0.00           C  
ATOM   1942  CG1 ILE X 123     224.687 226.857 324.314  1.00  0.00           C  
ATOM   1943  CG2 ILE X 123     222.926 228.631 324.237  1.00  0.00           C  
ATOM   1944  CD1 ILE X 123     225.366 227.479 325.545  1.00  0.00           C  
ATOM   1945  H   ILE X 123     222.872 224.624 324.305  1.00  0.00           H  
ATOM   1946  HA  ILE X 123     222.880 226.667 326.353  1.00  0.00           H  
ATOM   1947  HB  ILE X 123     222.680 226.661 323.376  1.00  0.00           H  
ATOM   1948 HG12 ILE X 123     224.816 225.776 324.363  1.00  0.00           H  
ATOM   1949 HG13 ILE X 123     225.050 227.326 323.399  1.00  0.00           H  
ATOM   1950 HG21 ILE X 123     223.039 229.094 325.218  1.00  0.00           H  
ATOM   1951 HG22 ILE X 123     221.912 228.778 323.865  1.00  0.00           H  
ATOM   1952 HG23 ILE X 123     223.583 229.020 323.459  1.00  0.00           H  
ATOM   1953 HD11 ILE X 123     225.353 228.537 325.284  1.00  0.00           H  
ATOM   1954 HD12 ILE X 123     226.426 227.230 325.598  1.00  0.00           H  
ATOM   1955 HD13 ILE X 123     224.876 227.258 326.494  1.00  0.00           H  
ATOM   1956  N   ARG X 124     219.959 226.183 324.906  1.00  0.00           N  
ATOM   1957  CA  ARG X 124     218.527 226.359 325.169  1.00  0.00           C  
ATOM   1958  C   ARG X 124     218.243 225.950 326.616  1.00  0.00           C  
ATOM   1959  O   ARG X 124     217.646 226.772 327.290  1.00  0.00           O  
ATOM   1960  CB  ARG X 124     217.727 225.554 324.239  1.00  0.00           C  
ATOM   1961  CG  ARG X 124     217.339 226.101 322.861  1.00  0.00           C  
ATOM   1962  CD  ARG X 124     216.422 225.088 322.167  1.00  0.00           C  
ATOM   1963  NE  ARG X 124     215.117 225.033 322.913  1.00  0.00           N  
ATOM   1964  CZ  ARG X 124     214.096 225.778 322.744  1.00  0.00           C  
ATOM   1965  NH1 ARG X 124     213.930 226.653 321.821  1.00  0.00           N1+
ATOM   1966  NH2 ARG X 124     213.146 225.738 323.572  1.00  0.00           N  
ATOM   1967  H   ARG X 124     220.231 225.555 324.164  1.00  0.00           H  
ATOM   1968  HA  ARG X 124     218.301 227.418 325.047  1.00  0.00           H  
ATOM   1969  HB2 ARG X 124     218.223 224.587 324.160  1.00  0.00           H  
ATOM   1970  HB3 ARG X 124     216.759 225.442 324.728  1.00  0.00           H  
ATOM   1971  HG2 ARG X 124     216.946 227.117 322.894  1.00  0.00           H  
ATOM   1972  HG3 ARG X 124     218.288 226.154 322.328  1.00  0.00           H  
ATOM   1973  HD2 ARG X 124     216.107 225.358 321.159  1.00  0.00           H  
ATOM   1974  HD3 ARG X 124     216.781 224.060 322.119  1.00  0.00           H  
ATOM   1975  HE  ARG X 124     215.021 224.273 323.572  1.00  0.00           H  
ATOM   1976 HH11 ARG X 124     214.789 226.812 321.313  1.00  0.00           H  
ATOM   1977 HH12 ARG X 124     213.120 227.255 321.809  1.00  0.00           H  
ATOM   1978 HH21 ARG X 124     213.031 225.108 324.354  1.00  0.00           H  
ATOM   1979 HH22 ARG X 124     212.351 226.325 323.365  1.00  0.00           H  
ATOM   1980  N   ARG X 125     218.665 224.792 327.100  1.00  0.00           N  
ATOM   1981  CA  ARG X 125     218.407 224.317 328.399  1.00  0.00           C  
ATOM   1982  C   ARG X 125     218.973 225.287 329.556  1.00  0.00           C  
ATOM   1983  O   ARG X 125     218.261 225.634 330.524  1.00  0.00           O  
ATOM   1984  CB  ARG X 125     218.872 222.846 328.619  1.00  0.00           C  
ATOM   1985  CG  ARG X 125     218.580 222.241 329.956  1.00  0.00           C  
ATOM   1986  CD  ARG X 125     218.727 220.653 329.906  1.00  0.00           C  
ATOM   1987  NE  ARG X 125     220.124 220.271 329.896  1.00  0.00           N  
ATOM   1988  CZ  ARG X 125     220.954 219.742 330.806  1.00  0.00           C  
ATOM   1989  NH1 ARG X 125     220.649 219.543 332.061  1.00  0.00           N1+
ATOM   1990  NH2 ARG X 125     222.120 219.280 330.393  1.00  0.00           N  
ATOM   1991  H   ARG X 125     219.242 224.178 326.543  1.00  0.00           H  
ATOM   1992  HA  ARG X 125     217.322 224.305 328.499  1.00  0.00           H  
ATOM   1993  HB2 ARG X 125     218.318 222.315 327.844  1.00  0.00           H  
ATOM   1994  HB3 ARG X 125     219.920 222.716 328.350  1.00  0.00           H  
ATOM   1995  HG2 ARG X 125     219.204 222.663 330.744  1.00  0.00           H  
ATOM   1996  HG3 ARG X 125     217.576 222.564 330.233  1.00  0.00           H  
ATOM   1997  HD2 ARG X 125     218.165 220.253 330.750  1.00  0.00           H  
ATOM   1998  HD3 ARG X 125     218.246 220.217 329.031  1.00  0.00           H  
ATOM   1999  HE  ARG X 125     220.533 220.428 328.986  1.00  0.00           H  
ATOM   2000 HH11 ARG X 125     219.712 219.745 332.378  1.00  0.00           H  
ATOM   2001 HH12 ARG X 125     221.205 218.880 332.582  1.00  0.00           H  
ATOM   2002 HH21 ARG X 125     222.393 219.357 329.424  1.00  0.00           H  
ATOM   2003 HH22 ARG X 125     222.588 218.631 331.008  1.00  0.00           H  
ATOM   2004  N   PHE X 126     220.090 225.935 329.243  1.00  0.00           N  
ATOM   2005  CA  PHE X 126     220.566 227.053 330.095  1.00  0.00           C  
ATOM   2006  C   PHE X 126     219.702 228.320 329.964  1.00  0.00           C  
ATOM   2007  O   PHE X 126     219.342 228.965 330.982  1.00  0.00           O  
ATOM   2008  CB  PHE X 126     222.063 227.156 329.921  1.00  0.00           C  
ATOM   2009  CG  PHE X 126     222.660 228.365 330.634  1.00  0.00           C  
ATOM   2010  CD1 PHE X 126     223.457 228.242 331.735  1.00  0.00           C  
ATOM   2011  CD2 PHE X 126     222.662 229.552 329.970  1.00  0.00           C  
ATOM   2012  CE1 PHE X 126     224.051 229.353 332.344  1.00  0.00           C  
ATOM   2013  CE2 PHE X 126     223.103 230.744 330.704  1.00  0.00           C  
ATOM   2014  CZ  PHE X 126     223.817 230.623 331.865  1.00  0.00           C  
ATOM   2015  H   PHE X 126     220.727 225.610 328.530  1.00  0.00           H  
ATOM   2016  HA  PHE X 126     220.462 226.900 331.169  1.00  0.00           H  
ATOM   2017  HB2 PHE X 126     222.331 226.193 330.354  1.00  0.00           H  
ATOM   2018  HB3 PHE X 126     222.320 227.032 328.869  1.00  0.00           H  
ATOM   2019  HD1 PHE X 126     223.715 227.268 332.121  1.00  0.00           H  
ATOM   2020  HD2 PHE X 126     222.178 229.601 329.005  1.00  0.00           H  
ATOM   2021  HE1 PHE X 126     224.621 229.267 333.257  1.00  0.00           H  
ATOM   2022  HE2 PHE X 126     223.063 231.664 330.139  1.00  0.00           H  
ATOM   2023  HZ  PHE X 126     224.388 231.450 332.258  1.00  0.00           H  
ATOM   2024  N   SER X 127     219.299 228.714 328.761  1.00  0.00           N  
ATOM   2025  CA  SER X 127     218.497 229.979 328.561  1.00  0.00           C  
ATOM   2026  C   SER X 127     217.097 229.787 329.243  1.00  0.00           C  
ATOM   2027  O   SER X 127     216.733 230.738 329.966  1.00  0.00           O  
ATOM   2028  CB  SER X 127     218.281 230.126 327.111  1.00  0.00           C  
ATOM   2029  OG  SER X 127     219.451 230.349 326.356  1.00  0.00           O  
ATOM   2030  H   SER X 127     219.246 228.021 328.028  1.00  0.00           H  
ATOM   2031  HA  SER X 127     219.111 230.806 328.917  1.00  0.00           H  
ATOM   2032  HB2 SER X 127     217.754 229.295 326.643  1.00  0.00           H  
ATOM   2033  HB3 SER X 127     217.652 231.015 327.050  1.00  0.00           H  
ATOM   2034  HG  SER X 127     219.835 229.496 326.141  1.00  0.00           H  
ATOM   2035  N   LEU X 128     216.444 228.637 329.084  1.00  0.00           N  
ATOM   2036  CA  LEU X 128     215.213 228.485 329.772  1.00  0.00           C  
ATOM   2037  C   LEU X 128     215.276 228.534 331.336  1.00  0.00           C  
ATOM   2038  O   LEU X 128     214.367 229.170 331.921  1.00  0.00           O  
ATOM   2039  CB  LEU X 128     214.455 227.166 329.406  1.00  0.00           C  
ATOM   2040  CG  LEU X 128     214.052 226.948 327.930  1.00  0.00           C  
ATOM   2041  CD1 LEU X 128     214.301 225.512 327.450  1.00  0.00           C  
ATOM   2042  CD2 LEU X 128     212.551 227.194 327.753  1.00  0.00           C  
ATOM   2043  H   LEU X 128     216.789 227.902 328.484  1.00  0.00           H  
ATOM   2044  HA  LEU X 128     214.587 229.319 329.455  1.00  0.00           H  
ATOM   2045  HB2 LEU X 128     215.044 226.330 329.780  1.00  0.00           H  
ATOM   2046  HB3 LEU X 128     213.495 227.221 329.920  1.00  0.00           H  
ATOM   2047  HG  LEU X 128     214.602 227.700 327.365  1.00  0.00           H  
ATOM   2048 HD11 LEU X 128     215.337 225.213 327.609  1.00  0.00           H  
ATOM   2049 HD12 LEU X 128     214.146 225.447 326.373  1.00  0.00           H  
ATOM   2050 HD13 LEU X 128     213.617 224.812 327.930  1.00  0.00           H  
ATOM   2051 HD21 LEU X 128     211.934 226.680 328.490  1.00  0.00           H  
ATOM   2052 HD22 LEU X 128     212.490 228.277 327.865  1.00  0.00           H  
ATOM   2053 HD23 LEU X 128     212.180 226.945 326.759  1.00  0.00           H  
ATOM   2054  N   MET X 129     216.366 228.068 331.962  1.00  0.00           N  
ATOM   2055  CA  MET X 129     216.511 228.258 333.379  1.00  0.00           C  
ATOM   2056  C   MET X 129     216.797 229.719 333.707  1.00  0.00           C  
ATOM   2057  O   MET X 129     216.108 230.348 334.585  1.00  0.00           O  
ATOM   2058  CB  MET X 129     217.630 227.402 334.018  1.00  0.00           C  
ATOM   2059  CG  MET X 129     218.209 227.751 335.425  1.00  0.00           C  
ATOM   2060  SD  MET X 129     219.617 228.954 335.528  1.00  0.00           S  
ATOM   2061  CE  MET X 129     220.853 228.060 334.593  1.00  0.00           C  
ATOM   2062  H   MET X 129     217.113 227.661 331.416  1.00  0.00           H  
ATOM   2063  HA  MET X 129     215.539 228.101 333.846  1.00  0.00           H  
ATOM   2064  HB2 MET X 129     217.238 226.385 334.022  1.00  0.00           H  
ATOM   2065  HB3 MET X 129     218.421 227.412 333.268  1.00  0.00           H  
ATOM   2066  HG2 MET X 129     217.361 228.047 336.042  1.00  0.00           H  
ATOM   2067  HG3 MET X 129     218.599 226.818 335.831  1.00  0.00           H  
ATOM   2068  HE1 MET X 129     220.651 228.188 333.529  1.00  0.00           H  
ATOM   2069  HE2 MET X 129     221.819 228.551 334.710  1.00  0.00           H  
ATOM   2070  HE3 MET X 129     220.824 226.972 334.653  1.00  0.00           H  
ATOM   2071  N   THR X 130     217.851 230.339 333.171  1.00  0.00           N  
ATOM   2072  CA  THR X 130     218.127 231.737 333.538  1.00  0.00           C  
ATOM   2073  C   THR X 130     216.952 232.765 333.287  1.00  0.00           C  
ATOM   2074  O   THR X 130     216.770 233.779 333.970  1.00  0.00           O  
ATOM   2075  CB  THR X 130     219.313 232.273 332.819  1.00  0.00           C  
ATOM   2076  CG2 THR X 130     220.660 231.561 333.000  1.00  0.00           C  
ATOM   2077  OG1 THR X 130     219.131 232.065 331.472  1.00  0.00           O  
ATOM   2078  H   THR X 130     218.359 229.758 332.520  1.00  0.00           H  
ATOM   2079  HA  THR X 130     218.277 231.693 334.616  1.00  0.00           H  
ATOM   2080  HB  THR X 130     219.463 233.331 333.035  1.00  0.00           H  
ATOM   2081  HG1 THR X 130     219.199 231.126 331.284  1.00  0.00           H  
ATOM   2082 HG21 THR X 130     220.839 231.261 334.032  1.00  0.00           H  
ATOM   2083 HG22 THR X 130     221.432 232.323 332.889  1.00  0.00           H  
ATOM   2084 HG23 THR X 130     220.801 230.699 332.348  1.00  0.00           H  
ATOM   2085  N   LEU X 131     216.150 232.488 332.221  1.00  0.00           N  
ATOM   2086  CA  LEU X 131     214.925 233.228 331.874  1.00  0.00           C  
ATOM   2087  C   LEU X 131     213.642 232.889 332.695  1.00  0.00           C  
ATOM   2088  O   LEU X 131     212.738 233.674 332.848  1.00  0.00           O  
ATOM   2089  CB  LEU X 131     214.654 233.217 330.392  1.00  0.00           C  
ATOM   2090  CG  LEU X 131     215.929 233.565 329.484  1.00  0.00           C  
ATOM   2091  CD1 LEU X 131     215.659 233.193 328.059  1.00  0.00           C  
ATOM   2092  CD2 LEU X 131     216.186 235.029 329.566  1.00  0.00           C  
ATOM   2093  H   LEU X 131     216.353 231.706 331.615  1.00  0.00           H  
ATOM   2094  HA  LEU X 131     215.149 234.269 332.104  1.00  0.00           H  
ATOM   2095  HB2 LEU X 131     214.301 232.239 330.065  1.00  0.00           H  
ATOM   2096  HB3 LEU X 131     213.888 233.949 330.137  1.00  0.00           H  
ATOM   2097  HG  LEU X 131     216.830 233.072 329.849  1.00  0.00           H  
ATOM   2098 HD11 LEU X 131     214.816 233.753 327.654  1.00  0.00           H  
ATOM   2099 HD12 LEU X 131     215.574 232.107 328.089  1.00  0.00           H  
ATOM   2100 HD13 LEU X 131     216.465 233.310 327.334  1.00  0.00           H  
ATOM   2101 HD21 LEU X 131     216.317 235.323 330.607  1.00  0.00           H  
ATOM   2102 HD22 LEU X 131     217.039 235.341 328.963  1.00  0.00           H  
ATOM   2103 HD23 LEU X 131     215.345 235.650 329.257  1.00  0.00           H  
ATOM   2104  N   ARG X 132     213.560 231.715 333.270  1.00  0.00           N  
ATOM   2105  CA  ARG X 132     212.664 231.427 334.429  1.00  0.00           C  
ATOM   2106  C   ARG X 132     213.284 232.055 335.746  1.00  0.00           C  
ATOM   2107  O   ARG X 132     213.192 231.492 336.823  1.00  0.00           O  
ATOM   2108  CB  ARG X 132     212.453 229.930 334.532  1.00  0.00           C  
ATOM   2109  CG  ARG X 132     211.452 229.443 333.378  1.00  0.00           C  
ATOM   2110  CD  ARG X 132     211.415 227.904 333.333  1.00  0.00           C  
ATOM   2111  NE  ARG X 132     210.250 227.506 332.538  1.00  0.00           N  
ATOM   2112  CZ  ARG X 132     209.710 226.305 332.472  1.00  0.00           C  
ATOM   2113  NH1 ARG X 132     210.004 225.297 333.215  1.00  0.00           N1+
ATOM   2114  NH2 ARG X 132     208.947 226.032 331.478  1.00  0.00           N  
ATOM   2115  H   ARG X 132     214.343 231.129 333.020  1.00  0.00           H  
ATOM   2116  HA  ARG X 132     211.639 231.779 334.310  1.00  0.00           H  
ATOM   2117  HB2 ARG X 132     213.371 229.365 334.372  1.00  0.00           H  
ATOM   2118  HB3 ARG X 132     211.911 229.808 335.470  1.00  0.00           H  
ATOM   2119  HG2 ARG X 132     210.441 229.777 333.611  1.00  0.00           H  
ATOM   2120  HG3 ARG X 132     211.750 229.817 332.398  1.00  0.00           H  
ATOM   2121  HD2 ARG X 132     212.345 227.570 332.871  1.00  0.00           H  
ATOM   2122  HD3 ARG X 132     211.361 227.549 334.362  1.00  0.00           H  
ATOM   2123  HE  ARG X 132     209.946 228.085 331.769  1.00  0.00           H  
ATOM   2124 HH11 ARG X 132     210.734 225.403 333.905  1.00  0.00           H  
ATOM   2125 HH12 ARG X 132     209.636 224.387 332.977  1.00  0.00           H  
ATOM   2126 HH21 ARG X 132     208.700 226.837 330.920  1.00  0.00           H  
ATOM   2127 HH22 ARG X 132     208.665 225.082 331.287  1.00  0.00           H  
ATOM   2128  N   ASN X 133     213.796 233.280 335.653  1.00  0.00           N  
ATOM   2129  CA  ASN X 133     214.379 234.070 336.714  1.00  0.00           C  
ATOM   2130  C   ASN X 133     215.577 233.535 337.552  1.00  0.00           C  
ATOM   2131  O   ASN X 133     216.225 234.224 338.307  1.00  0.00           O  
ATOM   2132  CB  ASN X 133     213.191 234.605 337.667  1.00  0.00           C  
ATOM   2133  CG  ASN X 133     212.552 235.895 337.203  1.00  0.00           C  
ATOM   2134  ND2 ASN X 133     211.284 235.963 337.372  1.00  0.00           N  
ATOM   2135  OD1 ASN X 133     213.205 236.773 336.619  1.00  0.00           O  
ATOM   2136  H   ASN X 133     213.388 233.859 334.934  1.00  0.00           H  
ATOM   2137  HA  ASN X 133     214.851 234.914 336.211  1.00  0.00           H  
ATOM   2138  HB2 ASN X 133     212.469 233.794 337.760  1.00  0.00           H  
ATOM   2139  HB3 ASN X 133     213.633 234.765 338.650  1.00  0.00           H  
ATOM   2140 HD21 ASN X 133     210.795 235.149 337.716  1.00  0.00           H  
ATOM   2141 HD22 ASN X 133     210.832 236.861 337.284  1.00  0.00           H  
ATOM   2142  N   PHE X 134     215.866 232.237 337.499  1.00  0.00           N  
ATOM   2143  CA  PHE X 134     216.941 231.631 338.273  1.00  0.00           C  
ATOM   2144  C   PHE X 134     218.296 232.321 337.992  1.00  0.00           C  
ATOM   2145  O   PHE X 134     218.628 232.543 336.836  1.00  0.00           O  
ATOM   2146  CB  PHE X 134     217.118 230.088 338.047  1.00  0.00           C  
ATOM   2147  CG  PHE X 134     215.866 229.298 338.447  1.00  0.00           C  
ATOM   2148  CD1 PHE X 134     214.850 228.922 337.484  1.00  0.00           C  
ATOM   2149  CD2 PHE X 134     215.629 229.071 339.810  1.00  0.00           C  
ATOM   2150  CE1 PHE X 134     213.734 228.167 337.908  1.00  0.00           C  
ATOM   2151  CE2 PHE X 134     214.559 228.178 340.157  1.00  0.00           C  
ATOM   2152  CZ  PHE X 134     213.708 227.680 339.218  1.00  0.00           C  
ATOM   2153  H   PHE X 134     215.324 231.543 337.005  1.00  0.00           H  
ATOM   2154  HA  PHE X 134     216.843 231.773 339.349  1.00  0.00           H  
ATOM   2155  HB2 PHE X 134     217.321 229.927 336.988  1.00  0.00           H  
ATOM   2156  HB3 PHE X 134     217.945 229.776 338.685  1.00  0.00           H  
ATOM   2157  HD1 PHE X 134     215.007 229.210 336.455  1.00  0.00           H  
ATOM   2158  HD2 PHE X 134     216.129 229.442 340.692  1.00  0.00           H  
ATOM   2159  HE1 PHE X 134     213.039 227.986 337.102  1.00  0.00           H  
ATOM   2160  HE2 PHE X 134     214.358 227.924 341.188  1.00  0.00           H  
ATOM   2161  HZ  PHE X 134     212.860 227.081 339.515  1.00  0.00           H  
ATOM   2162  N   GLY X 135     219.001 232.664 339.026  1.00  0.00           N  
ATOM   2163  CA  GLY X 135     220.281 233.329 338.997  1.00  0.00           C  
ATOM   2164  C   GLY X 135     220.450 234.788 338.562  1.00  0.00           C  
ATOM   2165  O   GLY X 135     221.540 235.296 338.389  1.00  0.00           O  
ATOM   2166  H   GLY X 135     218.621 232.378 339.917  1.00  0.00           H  
ATOM   2167  HA2 GLY X 135     220.808 233.077 339.917  1.00  0.00           H  
ATOM   2168  HA3 GLY X 135     220.846 232.772 338.250  1.00  0.00           H  
ATOM   2169  N   MET X 136     219.295 235.428 338.528  1.00  0.00           N  
ATOM   2170  CA  MET X 136     219.139 236.847 338.193  1.00  0.00           C  
ATOM   2171  C   MET X 136     219.301 237.831 339.395  1.00  0.00           C  
ATOM   2172  O   MET X 136     219.543 238.987 339.230  1.00  0.00           O  
ATOM   2173  CB  MET X 136     217.793 237.028 337.536  1.00  0.00           C  
ATOM   2174  CG  MET X 136     217.569 236.319 336.181  1.00  0.00           C  
ATOM   2175  SD  MET X 136     218.986 236.637 335.079  1.00  0.00           S  
ATOM   2176  CE  MET X 136     220.053 235.111 335.140  1.00  0.00           C  
ATOM   2177  H   MET X 136     218.493 234.822 338.632  1.00  0.00           H  
ATOM   2178  HA  MET X 136     219.888 237.188 337.478  1.00  0.00           H  
ATOM   2179  HB2 MET X 136     217.070 236.612 338.237  1.00  0.00           H  
ATOM   2180  HB3 MET X 136     217.605 238.093 337.401  1.00  0.00           H  
ATOM   2181  HG2 MET X 136     217.589 235.233 336.277  1.00  0.00           H  
ATOM   2182  HG3 MET X 136     216.679 236.795 335.769  1.00  0.00           H  
ATOM   2183  HE1 MET X 136     219.350 234.278 335.171  1.00  0.00           H  
ATOM   2184  HE2 MET X 136     220.659 234.989 334.243  1.00  0.00           H  
ATOM   2185  HE3 MET X 136     220.738 235.304 335.966  1.00  0.00           H  
ATOM   2186  N   GLY X 137     219.283 237.278 340.580  1.00  0.00           N  
ATOM   2187  CA  GLY X 137     219.639 237.988 341.800  1.00  0.00           C  
ATOM   2188  C   GLY X 137     218.568 238.792 342.528  1.00  0.00           C  
ATOM   2189  O   GLY X 137     217.395 238.558 342.340  1.00  0.00           O  
ATOM   2190  H   GLY X 137     219.271 236.269 340.586  1.00  0.00           H  
ATOM   2191  HA2 GLY X 137     219.914 237.238 342.541  1.00  0.00           H  
ATOM   2192  HA3 GLY X 137     220.505 238.610 341.570  1.00  0.00           H  
ATOM   2193  N   LYS X 138     219.088 239.783 343.220  1.00  0.00           N  
ATOM   2194  CA  LYS X 138     218.452 240.778 344.020  1.00  0.00           C  
ATOM   2195  C   LYS X 138     217.086 241.340 343.560  1.00  0.00           C  
ATOM   2196  O   LYS X 138     216.196 241.445 344.421  1.00  0.00           O  
ATOM   2197  CB  LYS X 138     219.391 241.916 344.188  1.00  0.00           C  
ATOM   2198  CG  LYS X 138     219.189 242.898 345.366  1.00  0.00           C  
ATOM   2199  CD  LYS X 138     220.160 244.074 345.245  1.00  0.00           C  
ATOM   2200  CE  LYS X 138     220.112 245.064 346.416  1.00  0.00           C  
ATOM   2201  NZ  LYS X 138     220.319 246.461 345.929  1.00  0.00           N1+
ATOM   2202  H   LYS X 138     220.097 239.745 343.243  1.00  0.00           H  
ATOM   2203  HA  LYS X 138     218.237 240.442 345.034  1.00  0.00           H  
ATOM   2204  HB2 LYS X 138     220.369 241.476 344.385  1.00  0.00           H  
ATOM   2205  HB3 LYS X 138     219.439 242.488 343.262  1.00  0.00           H  
ATOM   2206  HG2 LYS X 138     218.189 243.317 345.248  1.00  0.00           H  
ATOM   2207  HG3 LYS X 138     219.288 242.399 346.330  1.00  0.00           H  
ATOM   2208  HD2 LYS X 138     221.180 243.764 345.018  1.00  0.00           H  
ATOM   2209  HD3 LYS X 138     219.868 244.629 344.353  1.00  0.00           H  
ATOM   2210  HE2 LYS X 138     219.259 245.008 347.093  1.00  0.00           H  
ATOM   2211  HE3 LYS X 138     221.047 244.836 346.928  1.00  0.00           H  
ATOM   2212  HZ1 LYS X 138     220.377 247.111 346.700  1.00  0.00           H  
ATOM   2213  HZ2 LYS X 138     219.575 246.858 345.374  1.00  0.00           H  
ATOM   2214  HZ3 LYS X 138     221.140 246.562 345.349  1.00  0.00           H  
ATOM   2215  N   ARG X 139     216.906 241.730 342.274  1.00  0.00           N  
ATOM   2216  CA  ARG X 139     215.601 241.919 341.652  1.00  0.00           C  
ATOM   2217  C   ARG X 139     215.410 241.039 340.395  1.00  0.00           C  
ATOM   2218  O   ARG X 139     216.345 240.718 339.699  1.00  0.00           O  
ATOM   2219  CB  ARG X 139     215.344 243.393 341.308  1.00  0.00           C  
ATOM   2220  CG  ARG X 139     215.513 244.447 342.496  1.00  0.00           C  
ATOM   2221  CD  ARG X 139     214.429 244.343 343.585  1.00  0.00           C  
ATOM   2222  NE  ARG X 139     213.180 245.011 343.206  1.00  0.00           N  
ATOM   2223  CZ  ARG X 139     212.462 245.914 343.850  1.00  0.00           C  
ATOM   2224  NH1 ARG X 139     212.858 246.421 345.014  1.00  0.00           N1+
ATOM   2225  NH2 ARG X 139     211.372 246.477 343.389  1.00  0.00           N  
ATOM   2226  H   ARG X 139     217.661 241.413 341.683  1.00  0.00           H  
ATOM   2227  HA  ARG X 139     214.841 241.570 342.351  1.00  0.00           H  
ATOM   2228  HB2 ARG X 139     215.958 243.614 340.434  1.00  0.00           H  
ATOM   2229  HB3 ARG X 139     214.279 243.461 341.086  1.00  0.00           H  
ATOM   2230  HG2 ARG X 139     216.509 244.381 342.935  1.00  0.00           H  
ATOM   2231  HG3 ARG X 139     215.502 245.450 342.069  1.00  0.00           H  
ATOM   2232  HD2 ARG X 139     214.287 243.319 343.929  1.00  0.00           H  
ATOM   2233  HD3 ARG X 139     214.773 244.784 344.520  1.00  0.00           H  
ATOM   2234  HE  ARG X 139     212.893 244.798 342.261  1.00  0.00           H  
ATOM   2235 HH11 ARG X 139     213.527 245.872 345.536  1.00  0.00           H  
ATOM   2236 HH12 ARG X 139     212.457 247.294 345.325  1.00  0.00           H  
ATOM   2237 HH21 ARG X 139     211.195 246.368 342.401  1.00  0.00           H  
ATOM   2238 HH22 ARG X 139     210.683 246.907 343.989  1.00  0.00           H  
ATOM   2239  N   SER X 140     214.145 240.744 340.140  1.00  0.00           N  
ATOM   2240  CA  SER X 140     213.740 239.832 339.026  1.00  0.00           C  
ATOM   2241  C   SER X 140     213.480 240.434 337.648  1.00  0.00           C  
ATOM   2242  O   SER X 140     213.271 241.657 337.519  1.00  0.00           O  
ATOM   2243  CB  SER X 140     212.453 239.204 339.498  1.00  0.00           C  
ATOM   2244  OG  SER X 140     211.454 240.165 339.731  1.00  0.00           O  
ATOM   2245  H   SER X 140     213.429 241.272 340.619  1.00  0.00           H  
ATOM   2246  HA  SER X 140     214.510 239.092 338.805  1.00  0.00           H  
ATOM   2247  HB2 SER X 140     212.034 238.515 338.765  1.00  0.00           H  
ATOM   2248  HB3 SER X 140     212.695 238.627 340.391  1.00  0.00           H  
ATOM   2249  HG  SER X 140     210.642 239.706 339.505  1.00  0.00           H  
ATOM   2250  N   ILE X 141     213.242 239.704 336.552  1.00  0.00           N  
ATOM   2251  CA  ILE X 141     212.918 240.188 335.195  1.00  0.00           C  
ATOM   2252  C   ILE X 141     211.673 240.993 335.089  1.00  0.00           C  
ATOM   2253  O   ILE X 141     211.905 242.083 334.646  1.00  0.00           O  
ATOM   2254  CB  ILE X 141     212.993 238.959 334.249  1.00  0.00           C  
ATOM   2255  CG1 ILE X 141     214.478 238.708 333.956  1.00  0.00           C  
ATOM   2256  CG2 ILE X 141     212.264 239.100 332.886  1.00  0.00           C  
ATOM   2257  CD1 ILE X 141     214.980 237.373 333.519  1.00  0.00           C  
ATOM   2258  H   ILE X 141     213.327 238.699 336.608  1.00  0.00           H  
ATOM   2259  HA  ILE X 141     213.770 240.815 334.931  1.00  0.00           H  
ATOM   2260  HB  ILE X 141     212.726 238.049 334.786  1.00  0.00           H  
ATOM   2261 HG12 ILE X 141     214.861 239.501 333.314  1.00  0.00           H  
ATOM   2262 HG13 ILE X 141     215.011 238.801 334.903  1.00  0.00           H  
ATOM   2263 HG21 ILE X 141     212.266 238.168 332.321  1.00  0.00           H  
ATOM   2264 HG22 ILE X 141     212.630 239.995 332.382  1.00  0.00           H  
ATOM   2265 HG23 ILE X 141     211.184 239.216 332.979  1.00  0.00           H  
ATOM   2266 HD11 ILE X 141     214.919 236.649 334.332  1.00  0.00           H  
ATOM   2267 HD12 ILE X 141     216.055 237.467 333.369  1.00  0.00           H  
ATOM   2268 HD13 ILE X 141     214.578 237.098 332.544  1.00  0.00           H  
ATOM   2269  N   GLU X 142     210.563 240.534 335.581  1.00  0.00           N  
ATOM   2270  CA  GLU X 142     209.345 241.369 335.555  1.00  0.00           C  
ATOM   2271  C   GLU X 142     209.485 242.764 336.317  1.00  0.00           C  
ATOM   2272  O   GLU X 142     208.956 243.799 335.829  1.00  0.00           O  
ATOM   2273  CB  GLU X 142     208.156 240.492 335.913  1.00  0.00           C  
ATOM   2274  CG  GLU X 142     207.941 240.345 337.433  1.00  0.00           C  
ATOM   2275  CD  GLU X 142     208.731 239.206 338.077  1.00  0.00           C  
ATOM   2276  OE1 GLU X 142     209.007 239.254 339.296  1.00  0.00           O  
ATOM   2277  OE2 GLU X 142     209.420 238.396 337.378  1.00  0.00           O1-
ATOM   2278  H   GLU X 142     210.527 239.595 335.950  1.00  0.00           H  
ATOM   2279  HA  GLU X 142     209.099 241.731 334.557  1.00  0.00           H  
ATOM   2280  HB2 GLU X 142     207.367 241.198 335.654  1.00  0.00           H  
ATOM   2281  HB3 GLU X 142     208.100 239.527 335.410  1.00  0.00           H  
ATOM   2282  HG2 GLU X 142     208.119 241.351 337.814  1.00  0.00           H  
ATOM   2283  HG3 GLU X 142     206.898 240.047 337.541  1.00  0.00           H  
ATOM   2284  N   ASP X 143     210.289 242.799 337.436  1.00  0.00           N  
ATOM   2285  CA  ASP X 143     210.581 244.027 338.181  1.00  0.00           C  
ATOM   2286  C   ASP X 143     211.561 244.990 337.532  1.00  0.00           C  
ATOM   2287  O   ASP X 143     211.389 246.222 337.546  1.00  0.00           O  
ATOM   2288  CB  ASP X 143     210.980 243.655 339.566  1.00  0.00           C  
ATOM   2289  CG  ASP X 143     211.331 244.991 340.331  1.00  0.00           C  
ATOM   2290  OD1 ASP X 143     210.389 245.726 340.653  1.00  0.00           O  
ATOM   2291  OD2 ASP X 143     212.545 245.253 340.494  1.00  0.00           O1-
ATOM   2292  H   ASP X 143     210.636 241.903 337.746  1.00  0.00           H  
ATOM   2293  HA  ASP X 143     209.640 244.577 338.174  1.00  0.00           H  
ATOM   2294  HB2 ASP X 143     210.192 243.082 340.056  1.00  0.00           H  
ATOM   2295  HB3 ASP X 143     211.844 242.996 339.474  1.00  0.00           H  
ATOM   2296  N   ARG X 144     212.663 244.465 336.961  1.00  0.00           N  
ATOM   2297  CA  ARG X 144     213.507 245.170 335.862  1.00  0.00           C  
ATOM   2298  C   ARG X 144     212.805 245.613 334.612  1.00  0.00           C  
ATOM   2299  O   ARG X 144     212.912 246.764 334.210  1.00  0.00           O  
ATOM   2300  CB  ARG X 144     214.692 244.269 335.532  1.00  0.00           C  
ATOM   2301  CG  ARG X 144     215.651 243.914 336.643  1.00  0.00           C  
ATOM   2302  CD  ARG X 144     216.229 242.490 336.629  1.00  0.00           C  
ATOM   2303  NE  ARG X 144     217.690 242.469 336.198  1.00  0.00           N  
ATOM   2304  CZ  ARG X 144     218.521 241.502 336.504  1.00  0.00           C  
ATOM   2305  NH1 ARG X 144     218.208 240.556 337.448  1.00  0.00           N1+
ATOM   2306  NH2 ARG X 144     219.724 241.449 336.000  1.00  0.00           N  
ATOM   2307  H   ARG X 144     212.799 243.470 337.075  1.00  0.00           H  
ATOM   2308  HA  ARG X 144     213.867 246.092 336.317  1.00  0.00           H  
ATOM   2309  HB2 ARG X 144     214.184 243.377 335.166  1.00  0.00           H  
ATOM   2310  HB3 ARG X 144     215.288 244.621 334.690  1.00  0.00           H  
ATOM   2311  HG2 ARG X 144     216.438 244.647 336.817  1.00  0.00           H  
ATOM   2312  HG3 ARG X 144     215.048 244.010 337.546  1.00  0.00           H  
ATOM   2313  HD2 ARG X 144     216.036 242.004 337.585  1.00  0.00           H  
ATOM   2314  HD3 ARG X 144     215.714 241.852 335.911  1.00  0.00           H  
ATOM   2315  HE  ARG X 144     217.890 243.021 335.376  1.00  0.00           H  
ATOM   2316 HH11 ARG X 144     217.370 240.658 338.003  1.00  0.00           H  
ATOM   2317 HH12 ARG X 144     218.878 239.840 337.691  1.00  0.00           H  
ATOM   2318 HH21 ARG X 144     220.005 242.187 335.371  1.00  0.00           H  
ATOM   2319 HH22 ARG X 144     220.395 240.796 336.380  1.00  0.00           H  
ATOM   2320  N   VAL X 145     211.955 244.764 333.997  1.00  0.00           N  
ATOM   2321  CA  VAL X 145     210.921 245.137 333.020  1.00  0.00           C  
ATOM   2322  C   VAL X 145     209.962 246.264 333.495  1.00  0.00           C  
ATOM   2323  O   VAL X 145     209.802 247.180 332.661  1.00  0.00           O  
ATOM   2324  CB  VAL X 145     210.102 243.916 332.617  1.00  0.00           C  
ATOM   2325  CG1 VAL X 145     208.785 244.280 331.880  1.00  0.00           C  
ATOM   2326  CG2 VAL X 145     210.828 243.060 331.598  1.00  0.00           C  
ATOM   2327  H   VAL X 145     212.015 243.785 334.239  1.00  0.00           H  
ATOM   2328  HA  VAL X 145     211.392 245.498 332.106  1.00  0.00           H  
ATOM   2329  HB  VAL X 145     209.825 243.374 333.522  1.00  0.00           H  
ATOM   2330 HG11 VAL X 145     208.949 244.875 330.982  1.00  0.00           H  
ATOM   2331 HG12 VAL X 145     208.180 243.379 331.773  1.00  0.00           H  
ATOM   2332 HG13 VAL X 145     208.119 244.776 332.586  1.00  0.00           H  
ATOM   2333 HG21 VAL X 145     211.032 243.685 330.729  1.00  0.00           H  
ATOM   2334 HG22 VAL X 145     210.312 242.160 331.264  1.00  0.00           H  
ATOM   2335 HG23 VAL X 145     211.703 242.624 332.082  1.00  0.00           H  
ATOM   2336  N   GLN X 146     209.488 246.288 334.708  1.00  0.00           N  
ATOM   2337  CA  GLN X 146     208.651 247.365 335.286  1.00  0.00           C  
ATOM   2338  C   GLN X 146     209.310 248.670 335.381  1.00  0.00           C  
ATOM   2339  O   GLN X 146     208.692 249.641 335.038  1.00  0.00           O  
ATOM   2340  CB  GLN X 146     208.239 247.053 336.714  1.00  0.00           C  
ATOM   2341  CG  GLN X 146     206.790 247.596 337.003  1.00  0.00           C  
ATOM   2342  CD  GLN X 146     206.392 247.332 338.452  1.00  0.00           C  
ATOM   2343  NE2 GLN X 146     205.222 246.767 338.692  1.00  0.00           N  
ATOM   2344  OE1 GLN X 146     207.146 247.643 339.379  1.00  0.00           O  
ATOM   2345  H   GLN X 146     209.611 245.405 335.183  1.00  0.00           H  
ATOM   2346  HA  GLN X 146     207.797 247.586 334.646  1.00  0.00           H  
ATOM   2347  HB2 GLN X 146     208.387 246.009 336.991  1.00  0.00           H  
ATOM   2348  HB3 GLN X 146     208.900 247.542 337.430  1.00  0.00           H  
ATOM   2349  HG2 GLN X 146     206.590 248.646 336.793  1.00  0.00           H  
ATOM   2350  HG3 GLN X 146     206.083 247.089 336.347  1.00  0.00           H  
ATOM   2351 HE21 GLN X 146     204.921 246.554 339.632  1.00  0.00           H  
ATOM   2352 HE22 GLN X 146     204.679 246.536 337.872  1.00  0.00           H  
ATOM   2353  N   GLU X 147     210.540 248.717 335.822  1.00  0.00           N  
ATOM   2354  CA  GLU X 147     211.302 249.864 335.950  1.00  0.00           C  
ATOM   2355  C   GLU X 147     211.547 250.516 334.493  1.00  0.00           C  
ATOM   2356  O   GLU X 147     211.566 251.776 334.399  1.00  0.00           O  
ATOM   2357  CB  GLU X 147     212.682 249.485 336.476  1.00  0.00           C  
ATOM   2358  CG  GLU X 147     213.662 250.590 336.800  1.00  0.00           C  
ATOM   2359  CD  GLU X 147     213.324 251.501 337.997  1.00  0.00           C  
ATOM   2360  OE1 GLU X 147     212.738 250.970 338.996  1.00  0.00           O  
ATOM   2361  OE2 GLU X 147     213.506 252.788 337.897  1.00  0.00           O1-
ATOM   2362  H   GLU X 147     211.021 247.880 336.116  1.00  0.00           H  
ATOM   2363  HA  GLU X 147     210.929 250.663 336.590  1.00  0.00           H  
ATOM   2364  HB2 GLU X 147     212.651 248.827 337.345  1.00  0.00           H  
ATOM   2365  HB3 GLU X 147     213.205 248.937 335.692  1.00  0.00           H  
ATOM   2366  HG2 GLU X 147     214.675 250.198 336.895  1.00  0.00           H  
ATOM   2367  HG3 GLU X 147     213.704 251.189 335.890  1.00  0.00           H  
ATOM   2368  N   GLH X 148     211.725 249.690 333.481  1.00  0.00           N  
ATOM   2369  CA  GLH X 148     211.878 250.045 332.043  1.00  0.00           C  
ATOM   2370  C   GLH X 148     210.589 250.479 331.325  1.00  0.00           C  
ATOM   2371  O   GLH X 148     210.596 251.204 330.368  1.00  0.00           O  
ATOM   2372  CB  GLH X 148     212.591 248.899 331.404  1.00  0.00           C  
ATOM   2373  CG  GLH X 148     213.097 249.078 330.010  1.00  0.00           C  
ATOM   2374  CD  GLH X 148     213.769 250.428 329.778  1.00  0.00           C  
ATOM   2375  OE1 GLH X 148     213.412 251.254 328.919  1.00  0.00           O  
ATOM   2376  OE2 GLH X 148     214.735 250.688 330.677  1.00  0.00           O  
ATOM   2377  H   GLH X 148     211.821 248.701 333.663  1.00  0.00           H  
ATOM   2378  HA  GLH X 148     212.525 250.922 332.061  1.00  0.00           H  
ATOM   2379  HB2 GLH X 148     213.454 248.566 331.980  1.00  0.00           H  
ATOM   2380  HB3 GLH X 148     211.962 248.009 331.428  1.00  0.00           H  
ATOM   2381  HG2 GLH X 148     213.808 248.268 329.846  1.00  0.00           H  
ATOM   2382  HG3 GLH X 148     212.275 248.968 329.302  1.00  0.00           H  
ATOM   2383  HE2 GLH X 148     215.164 251.540 330.568  1.00  0.00           H  
ATOM   2384  N   ALA X 149     209.429 250.114 331.802  1.00  0.00           N  
ATOM   2385  CA  ALA X 149     208.136 250.595 331.416  1.00  0.00           C  
ATOM   2386  C   ALA X 149     207.872 251.973 331.969  1.00  0.00           C  
ATOM   2387  O   ALA X 149     207.238 252.757 331.285  1.00  0.00           O  
ATOM   2388  CB  ALA X 149     207.179 249.448 331.801  1.00  0.00           C  
ATOM   2389  H   ALA X 149     209.414 249.428 332.544  1.00  0.00           H  
ATOM   2390  HA  ALA X 149     208.134 250.688 330.330  1.00  0.00           H  
ATOM   2391  HB1 ALA X 149     206.187 249.688 331.420  1.00  0.00           H  
ATOM   2392  HB2 ALA X 149     207.031 249.447 332.881  1.00  0.00           H  
ATOM   2393  HB3 ALA X 149     207.473 248.487 331.380  1.00  0.00           H  
ATOM   2394  N   ARG X 150     208.328 252.273 333.208  1.00  0.00           N  
ATOM   2395  CA  ARG X 150     208.315 253.688 333.659  1.00  0.00           C  
ATOM   2396  C   ARG X 150     209.170 254.553 332.762  1.00  0.00           C  
ATOM   2397  O   ARG X 150     208.726 255.665 332.371  1.00  0.00           O  
ATOM   2398  CB  ARG X 150     208.624 253.737 335.156  1.00  0.00           C  
ATOM   2399  CG  ARG X 150     207.520 253.159 335.969  1.00  0.00           C  
ATOM   2400  CD  ARG X 150     207.734 253.242 337.505  1.00  0.00           C  
ATOM   2401  NE  ARG X 150     208.864 252.413 337.942  1.00  0.00           N  
ATOM   2402  CZ  ARG X 150     208.831 251.233 338.461  1.00  0.00           C  
ATOM   2403  NH1 ARG X 150     207.757 250.508 338.535  1.00  0.00           N1+
ATOM   2404  NH2 ARG X 150     209.889 250.688 338.968  1.00  0.00           N  
ATOM   2405  H   ARG X 150     208.864 251.574 333.704  1.00  0.00           H  
ATOM   2406  HA  ARG X 150     207.291 254.061 333.667  1.00  0.00           H  
ATOM   2407  HB2 ARG X 150     209.577 253.236 335.327  1.00  0.00           H  
ATOM   2408  HB3 ARG X 150     208.782 254.794 335.367  1.00  0.00           H  
ATOM   2409  HG2 ARG X 150     206.513 253.538 335.797  1.00  0.00           H  
ATOM   2410  HG3 ARG X 150     207.558 252.091 335.757  1.00  0.00           H  
ATOM   2411  HD2 ARG X 150     207.972 254.269 337.779  1.00  0.00           H  
ATOM   2412  HD3 ARG X 150     206.851 252.954 338.076  1.00  0.00           H  
ATOM   2413  HE  ARG X 150     209.745 252.904 337.990  1.00  0.00           H  
ATOM   2414 HH11 ARG X 150     206.858 250.740 338.137  1.00  0.00           H  
ATOM   2415 HH12 ARG X 150     207.737 249.608 338.994  1.00  0.00           H  
ATOM   2416 HH21 ARG X 150     210.824 251.066 338.918  1.00  0.00           H  
ATOM   2417 HH22 ARG X 150     209.945 249.772 339.389  1.00  0.00           H  
ATOM   2418  N   CYS X 151     210.384 254.035 332.448  1.00  0.00           N  
ATOM   2419  CA  CYS X 151     211.417 254.737 331.608  1.00  0.00           C  
ATOM   2420  C   CYS X 151     210.774 254.878 330.209  1.00  0.00           C  
ATOM   2421  O   CYS X 151     210.852 255.998 329.799  1.00  0.00           O  
ATOM   2422  CB  CYS X 151     212.686 253.952 331.454  1.00  0.00           C  
ATOM   2423  SG  CYS X 151     213.657 253.738 333.041  1.00  0.00           S  
ATOM   2424  H   CYS X 151     210.609 253.078 332.681  1.00  0.00           H  
ATOM   2425  HA  CYS X 151     211.494 255.679 332.151  1.00  0.00           H  
ATOM   2426  HB2 CYS X 151     212.557 253.059 330.843  1.00  0.00           H  
ATOM   2427  HB3 CYS X 151     213.283 254.595 330.807  1.00  0.00           H  
ATOM   2428  HG  CYS X 151     212.901 252.776 333.578  1.00  0.00           H  
ATOM   2429  N   LEU X 152     210.047 253.929 329.628  1.00  0.00           N  
ATOM   2430  CA  LEU X 152     209.317 254.017 328.296  1.00  0.00           C  
ATOM   2431  C   LEU X 152     208.203 255.136 328.274  1.00  0.00           C  
ATOM   2432  O   LEU X 152     208.153 255.986 327.391  1.00  0.00           O  
ATOM   2433  CB  LEU X 152     208.762 252.674 327.809  1.00  0.00           C  
ATOM   2434  CG  LEU X 152     207.997 252.518 326.486  1.00  0.00           C  
ATOM   2435  CD1 LEU X 152     208.891 252.966 325.377  1.00  0.00           C  
ATOM   2436  CD2 LEU X 152     207.526 251.006 326.262  1.00  0.00           C  
ATOM   2437  H   LEU X 152     210.000 252.980 329.972  1.00  0.00           H  
ATOM   2438  HA  LEU X 152     210.095 254.452 327.668  1.00  0.00           H  
ATOM   2439  HB2 LEU X 152     209.567 251.941 327.750  1.00  0.00           H  
ATOM   2440  HB3 LEU X 152     208.081 252.303 328.575  1.00  0.00           H  
ATOM   2441  HG  LEU X 152     207.127 253.171 326.417  1.00  0.00           H  
ATOM   2442 HD11 LEU X 152     209.086 254.038 325.416  1.00  0.00           H  
ATOM   2443 HD12 LEU X 152     208.388 252.754 324.433  1.00  0.00           H  
ATOM   2444 HD13 LEU X 152     209.869 252.485 325.347  1.00  0.00           H  
ATOM   2445 HD21 LEU X 152     206.984 250.722 327.163  1.00  0.00           H  
ATOM   2446 HD22 LEU X 152     206.849 250.927 325.412  1.00  0.00           H  
ATOM   2447 HD23 LEU X 152     208.429 250.432 326.052  1.00  0.00           H  
ATOM   2448  N   VAL X 153     207.299 255.127 329.279  1.00  0.00           N  
ATOM   2449  CA  VAL X 153     206.219 256.071 329.351  1.00  0.00           C  
ATOM   2450  C   VAL X 153     206.741 257.504 329.546  1.00  0.00           C  
ATOM   2451  O   VAL X 153     206.193 258.432 328.984  1.00  0.00           O  
ATOM   2452  CB  VAL X 153     205.101 255.658 330.345  1.00  0.00           C  
ATOM   2453  CG1 VAL X 153     204.449 254.292 329.959  1.00  0.00           C  
ATOM   2454  CG2 VAL X 153     205.491 255.714 331.837  1.00  0.00           C  
ATOM   2455  H   VAL X 153     207.286 254.366 329.943  1.00  0.00           H  
ATOM   2456  HA  VAL X 153     205.618 256.071 328.442  1.00  0.00           H  
ATOM   2457  HB  VAL X 153     204.247 256.331 330.275  1.00  0.00           H  
ATOM   2458 HG11 VAL X 153     203.807 254.378 329.082  1.00  0.00           H  
ATOM   2459 HG12 VAL X 153     205.216 253.518 329.947  1.00  0.00           H  
ATOM   2460 HG13 VAL X 153     203.693 254.051 330.706  1.00  0.00           H  
ATOM   2461 HG21 VAL X 153     206.352 255.062 331.979  1.00  0.00           H  
ATOM   2462 HG22 VAL X 153     204.643 255.360 332.423  1.00  0.00           H  
ATOM   2463 HG23 VAL X 153     205.785 256.720 332.136  1.00  0.00           H  
ATOM   2464  N   GLU X 154     207.836 257.701 330.258  1.00  0.00           N  
ATOM   2465  CA  GLU X 154     208.411 259.087 330.477  1.00  0.00           C  
ATOM   2466  C   GLU X 154     209.160 259.654 329.183  1.00  0.00           C  
ATOM   2467  O   GLU X 154     209.165 260.849 329.019  1.00  0.00           O  
ATOM   2468  CB  GLU X 154     209.396 259.009 331.689  1.00  0.00           C  
ATOM   2469  CG  GLU X 154     208.772 259.061 333.053  1.00  0.00           C  
ATOM   2470  CD  GLU X 154     208.013 260.306 333.422  1.00  0.00           C  
ATOM   2471  OE1 GLU X 154     208.345 261.394 332.960  1.00  0.00           O  
ATOM   2472  OE2 GLU X 154     206.952 260.146 334.024  1.00  0.00           O1-
ATOM   2473  H   GLU X 154     208.355 256.918 330.629  1.00  0.00           H  
ATOM   2474  HA  GLU X 154     207.629 259.811 330.704  1.00  0.00           H  
ATOM   2475  HB2 GLU X 154     210.058 258.164 331.499  1.00  0.00           H  
ATOM   2476  HB3 GLU X 154     210.008 259.911 331.687  1.00  0.00           H  
ATOM   2477  HG2 GLU X 154     208.109 258.197 333.081  1.00  0.00           H  
ATOM   2478  HG3 GLU X 154     209.554 258.907 333.797  1.00  0.00           H  
ATOM   2479  N   GLU X 155     209.646 258.760 328.292  1.00  0.00           N  
ATOM   2480  CA  GLU X 155     210.108 259.161 326.923  1.00  0.00           C  
ATOM   2481  C   GLU X 155     208.941 259.531 325.981  1.00  0.00           C  
ATOM   2482  O   GLU X 155     209.038 260.470 325.224  1.00  0.00           O  
ATOM   2483  CB  GLU X 155     210.990 258.178 326.258  1.00  0.00           C  
ATOM   2484  CG  GLU X 155     211.545 258.438 324.957  1.00  0.00           C  
ATOM   2485  CD  GLU X 155     212.561 259.623 324.962  1.00  0.00           C  
ATOM   2486  OE1 GLU X 155     212.372 260.707 324.314  1.00  0.00           O  
ATOM   2487  OE2 GLU X 155     213.592 259.541 325.658  1.00  0.00           O1-
ATOM   2488  H   GLU X 155     209.587 257.803 328.611  1.00  0.00           H  
ATOM   2489  HA  GLU X 155     210.666 260.084 327.083  1.00  0.00           H  
ATOM   2490  HB2 GLU X 155     211.869 258.028 326.885  1.00  0.00           H  
ATOM   2491  HB3 GLU X 155     210.434 257.249 326.138  1.00  0.00           H  
ATOM   2492  HG2 GLU X 155     212.048 257.502 324.717  1.00  0.00           H  
ATOM   2493  HG3 GLU X 155     210.781 258.640 324.207  1.00  0.00           H  
ATOM   2494  N   LEU X 156     207.821 258.882 326.176  1.00  0.00           N  
ATOM   2495  CA  LEU X 156     206.616 259.285 325.446  1.00  0.00           C  
ATOM   2496  C   LEU X 156     206.247 260.713 325.929  1.00  0.00           C  
ATOM   2497  O   LEU X 156     205.831 261.522 325.073  1.00  0.00           O  
ATOM   2498  CB  LEU X 156     205.490 258.262 325.546  1.00  0.00           C  
ATOM   2499  CG  LEU X 156     205.742 256.925 324.850  1.00  0.00           C  
ATOM   2500  CD1 LEU X 156     204.518 256.062 325.164  1.00  0.00           C  
ATOM   2501  CD2 LEU X 156     205.917 256.971 323.383  1.00  0.00           C  
ATOM   2502  H   LEU X 156     207.767 258.081 326.789  1.00  0.00           H  
ATOM   2503  HA  LEU X 156     206.736 259.497 324.383  1.00  0.00           H  
ATOM   2504  HB2 LEU X 156     205.172 258.149 326.582  1.00  0.00           H  
ATOM   2505  HB3 LEU X 156     204.641 258.711 325.031  1.00  0.00           H  
ATOM   2506  HG  LEU X 156     206.611 256.420 325.270  1.00  0.00           H  
ATOM   2507 HD11 LEU X 156     203.633 256.371 324.609  1.00  0.00           H  
ATOM   2508 HD12 LEU X 156     204.292 255.962 326.225  1.00  0.00           H  
ATOM   2509 HD13 LEU X 156     204.809 255.105 324.729  1.00  0.00           H  
ATOM   2510 HD21 LEU X 156     205.011 257.291 322.868  1.00  0.00           H  
ATOM   2511 HD22 LEU X 156     206.825 257.508 323.108  1.00  0.00           H  
ATOM   2512 HD23 LEU X 156     205.993 255.947 323.015  1.00  0.00           H  
ATOM   2513  N   ARG X 157     206.337 261.131 327.210  1.00  0.00           N  
ATOM   2514  CA  ARG X 157     205.876 262.466 327.604  1.00  0.00           C  
ATOM   2515  C   ARG X 157     206.643 263.537 326.884  1.00  0.00           C  
ATOM   2516  O   ARG X 157     206.010 264.553 326.469  1.00  0.00           O  
ATOM   2517  CB  ARG X 157     206.011 262.653 329.128  1.00  0.00           C  
ATOM   2518  CG  ARG X 157     205.213 261.603 330.025  1.00  0.00           C  
ATOM   2519  CD  ARG X 157     205.127 262.023 331.518  1.00  0.00           C  
ATOM   2520  NE  ARG X 157     204.614 261.010 332.335  1.00  0.00           N  
ATOM   2521  CZ  ARG X 157     203.335 260.666 332.380  1.00  0.00           C  
ATOM   2522  NH1 ARG X 157     202.405 261.257 331.672  1.00  0.00           N1+
ATOM   2523  NH2 ARG X 157     202.976 259.729 333.229  1.00  0.00           N  
ATOM   2524  H   ARG X 157     206.436 260.435 327.936  1.00  0.00           H  
ATOM   2525  HA  ARG X 157     204.862 262.617 327.234  1.00  0.00           H  
ATOM   2526  HB2 ARG X 157     207.058 262.585 329.423  1.00  0.00           H  
ATOM   2527  HB3 ARG X 157     205.674 263.662 329.367  1.00  0.00           H  
ATOM   2528  HG2 ARG X 157     204.171 261.549 329.709  1.00  0.00           H  
ATOM   2529  HG3 ARG X 157     205.701 260.633 329.930  1.00  0.00           H  
ATOM   2530  HD2 ARG X 157     206.195 262.068 331.732  1.00  0.00           H  
ATOM   2531  HD3 ARG X 157     204.582 262.955 331.669  1.00  0.00           H  
ATOM   2532  HE  ARG X 157     205.222 260.601 333.030  1.00  0.00           H  
ATOM   2533 HH11 ARG X 157     202.601 262.093 331.141  1.00  0.00           H  
ATOM   2534 HH12 ARG X 157     201.447 260.999 331.860  1.00  0.00           H  
ATOM   2535 HH21 ARG X 157     203.616 259.464 333.964  1.00  0.00           H  
ATOM   2536 HH22 ARG X 157     202.025 259.390 333.270  1.00  0.00           H  
ATOM   2537  N   LYS X 158     207.952 263.323 326.538  1.00  0.00           N  
ATOM   2538  CA  LYS X 158     208.791 264.188 325.659  1.00  0.00           C  
ATOM   2539  C   LYS X 158     208.332 264.310 324.183  1.00  0.00           C  
ATOM   2540  O   LYS X 158     208.745 265.252 323.502  1.00  0.00           O  
ATOM   2541  CB  LYS X 158     210.240 263.753 325.719  1.00  0.00           C  
ATOM   2542  CG  LYS X 158     210.747 263.560 327.202  1.00  0.00           C  
ATOM   2543  CD  LYS X 158     212.097 262.933 327.010  1.00  0.00           C  
ATOM   2544  CE  LYS X 158     212.703 262.267 328.269  1.00  0.00           C  
ATOM   2545  NZ  LYS X 158     213.699 261.188 327.958  1.00  0.00           N1+
ATOM   2546  H   LYS X 158     208.362 262.428 326.764  1.00  0.00           H  
ATOM   2547  HA  LYS X 158     208.946 265.119 326.204  1.00  0.00           H  
ATOM   2548  HB2 LYS X 158     210.357 262.795 325.211  1.00  0.00           H  
ATOM   2549  HB3 LYS X 158     210.883 264.469 325.207  1.00  0.00           H  
ATOM   2550  HG2 LYS X 158     210.778 264.492 327.766  1.00  0.00           H  
ATOM   2551  HG3 LYS X 158     210.145 262.847 327.765  1.00  0.00           H  
ATOM   2552  HD2 LYS X 158     212.013 262.039 326.392  1.00  0.00           H  
ATOM   2553  HD3 LYS X 158     212.812 263.692 326.692  1.00  0.00           H  
ATOM   2554  HE2 LYS X 158     213.224 263.009 328.875  1.00  0.00           H  
ATOM   2555  HE3 LYS X 158     211.937 261.801 328.889  1.00  0.00           H  
ATOM   2556  HZ1 LYS X 158     214.530 261.507 327.481  1.00  0.00           H  
ATOM   2557  HZ2 LYS X 158     213.317 260.528 327.296  1.00  0.00           H  
ATOM   2558  HZ3 LYS X 158     213.923 260.732 328.831  1.00  0.00           H  
ATOM   2559  N   THR X 159     207.319 263.588 323.699  1.00  0.00           N  
ATOM   2560  CA  THR X 159     206.592 263.858 322.410  1.00  0.00           C  
ATOM   2561  C   THR X 159     205.561 265.032 322.622  1.00  0.00           C  
ATOM   2562  O   THR X 159     205.076 265.611 321.632  1.00  0.00           O  
ATOM   2563  CB  THR X 159     205.882 262.600 321.915  1.00  0.00           C  
ATOM   2564  CG2 THR X 159     206.728 261.368 321.662  1.00  0.00           C  
ATOM   2565  OG1 THR X 159     204.835 262.358 322.766  1.00  0.00           O  
ATOM   2566  H   THR X 159     206.992 262.888 324.351  1.00  0.00           H  
ATOM   2567  HA  THR X 159     207.347 264.251 321.729  1.00  0.00           H  
ATOM   2568  HB  THR X 159     205.419 262.883 320.969  1.00  0.00           H  
ATOM   2569  HG1 THR X 159     205.183 261.723 323.397  1.00  0.00           H  
ATOM   2570 HG21 THR X 159     207.390 261.594 320.826  1.00  0.00           H  
ATOM   2571 HG22 THR X 159     206.109 260.542 321.310  1.00  0.00           H  
ATOM   2572 HG23 THR X 159     207.287 261.039 322.538  1.00  0.00           H  
ATOM   2573  N   LYS X 160     205.260 265.474 323.831  1.00  0.00           N  
ATOM   2574  CA  LYS X 160     204.367 266.575 324.221  1.00  0.00           C  
ATOM   2575  C   LYS X 160     203.106 266.704 323.365  1.00  0.00           C  
ATOM   2576  O   LYS X 160     202.946 267.708 322.714  1.00  0.00           O  
ATOM   2577  CB  LYS X 160     205.149 267.878 324.414  1.00  0.00           C  
ATOM   2578  CG  LYS X 160     206.184 267.806 325.525  1.00  0.00           C  
ATOM   2579  CD  LYS X 160     207.187 269.072 325.510  1.00  0.00           C  
ATOM   2580  CE  LYS X 160     208.098 268.982 326.727  1.00  0.00           C  
ATOM   2581  NZ  LYS X 160     209.042 270.102 326.873  1.00  0.00           N1+
ATOM   2582  H   LYS X 160     205.497 264.938 324.654  1.00  0.00           H  
ATOM   2583  HA  LYS X 160     204.060 266.326 325.237  1.00  0.00           H  
ATOM   2584  HB2 LYS X 160     205.685 268.023 323.476  1.00  0.00           H  
ATOM   2585  HB3 LYS X 160     204.520 268.731 324.669  1.00  0.00           H  
ATOM   2586  HG2 LYS X 160     205.547 267.732 326.407  1.00  0.00           H  
ATOM   2587  HG3 LYS X 160     206.763 266.887 325.429  1.00  0.00           H  
ATOM   2588  HD2 LYS X 160     207.802 268.949 324.619  1.00  0.00           H  
ATOM   2589  HD3 LYS X 160     206.652 270.019 325.587  1.00  0.00           H  
ATOM   2590  HE2 LYS X 160     207.451 269.133 327.591  1.00  0.00           H  
ATOM   2591  HE3 LYS X 160     208.474 267.960 326.778  1.00  0.00           H  
ATOM   2592  HZ1 LYS X 160     209.443 270.200 327.794  1.00  0.00           H  
ATOM   2593  HZ2 LYS X 160     208.616 270.990 326.647  1.00  0.00           H  
ATOM   2594  HZ3 LYS X 160     209.838 269.980 326.264  1.00  0.00           H  
ATOM   2595  N   ALA X 161     202.285 265.655 323.154  1.00  0.00           N  
ATOM   2596  CA  ALA X 161     201.215 265.441 322.248  1.00  0.00           C  
ATOM   2597  C   ALA X 161     201.363 265.704 320.750  1.00  0.00           C  
ATOM   2598  O   ALA X 161     200.356 265.533 320.045  1.00  0.00           O  
ATOM   2599  CB  ALA X 161     199.926 266.189 322.811  1.00  0.00           C  
ATOM   2600  H   ALA X 161     202.562 264.844 323.689  1.00  0.00           H  
ATOM   2601  HA  ALA X 161     201.034 264.369 322.326  1.00  0.00           H  
ATOM   2602  HB1 ALA X 161     199.123 265.919 322.125  1.00  0.00           H  
ATOM   2603  HB2 ALA X 161     200.073 267.268 322.758  1.00  0.00           H  
ATOM   2604  HB3 ALA X 161     199.622 265.948 323.830  1.00  0.00           H  
ATOM   2605  N   SER X 162     202.558 266.054 320.304  1.00  0.00           N  
ATOM   2606  CA  SER X 162     202.899 266.201 318.836  1.00  0.00           C  
ATOM   2607  C   SER X 162     202.911 264.847 318.020  1.00  0.00           C  
ATOM   2608  O   SER X 162     203.123 263.807 318.647  1.00  0.00           O  
ATOM   2609  CB  SER X 162     204.202 266.980 318.682  1.00  0.00           C  
ATOM   2610  OG  SER X 162     205.410 266.382 319.036  1.00  0.00           O  
ATOM   2611  H   SER X 162     203.220 266.308 321.023  1.00  0.00           H  
ATOM   2612  HA  SER X 162     202.087 266.717 318.324  1.00  0.00           H  
ATOM   2613  HB2 SER X 162     204.250 267.194 317.614  1.00  0.00           H  
ATOM   2614  HB3 SER X 162     204.042 267.895 319.252  1.00  0.00           H  
ATOM   2615  HG  SER X 162     205.565 266.393 319.983  1.00  0.00           H  
ATOM   2616  N   PRO X 163     202.658 264.818 316.672  1.00  0.00           N  
ATOM   2617  CA  PRO X 163     202.669 263.673 315.839  1.00  0.00           C  
ATOM   2618  C   PRO X 163     204.098 263.191 315.594  1.00  0.00           C  
ATOM   2619  O   PRO X 163     204.988 263.898 315.111  1.00  0.00           O  
ATOM   2620  CB  PRO X 163     201.942 264.033 314.533  1.00  0.00           C  
ATOM   2621  CG  PRO X 163     202.262 265.512 314.464  1.00  0.00           C  
ATOM   2622  CD  PRO X 163     202.270 265.989 315.881  1.00  0.00           C  
ATOM   2623  HA  PRO X 163     202.192 262.936 316.484  1.00  0.00           H  
ATOM   2624  HB2 PRO X 163     202.505 263.472 313.787  1.00  0.00           H  
ATOM   2625  HB3 PRO X 163     200.853 263.982 314.567  1.00  0.00           H  
ATOM   2626  HG2 PRO X 163     203.281 265.675 314.114  1.00  0.00           H  
ATOM   2627  HG3 PRO X 163     201.722 266.140 313.755  1.00  0.00           H  
ATOM   2628  HD2 PRO X 163     203.025 266.764 316.012  1.00  0.00           H  
ATOM   2629  HD3 PRO X 163     201.256 266.272 316.163  1.00  0.00           H  
ATOM   2630  N   CYS X 164     204.289 261.953 315.936  1.00  0.00           N  
ATOM   2631  CA  CYS X 164     205.589 261.244 315.857  1.00  0.00           C  
ATOM   2632  C   CYS X 164     205.580 259.718 315.429  1.00  0.00           C  
ATOM   2633  O   CYS X 164     204.535 259.174 315.606  1.00  0.00           O  
ATOM   2634  CB  CYS X 164     206.249 261.390 317.270  1.00  0.00           C  
ATOM   2635  SG  CYS X 164     205.313 260.401 318.475  1.00  0.00           S  
ATOM   2636  H   CYS X 164     203.495 261.409 316.244  1.00  0.00           H  
ATOM   2637  HA  CYS X 164     206.242 261.815 315.197  1.00  0.00           H  
ATOM   2638  HB2 CYS X 164     207.269 261.006 317.250  1.00  0.00           H  
ATOM   2639  HB3 CYS X 164     206.183 262.426 317.603  1.00  0.00           H  
ATOM   2640  HG  CYS X 164     204.038 260.797 318.504  1.00  0.00           H  
ATOM   2641  N   ASP X 165     206.680 259.147 314.862  1.00  0.00           N  
ATOM   2642  CA  ASP X 165     206.975 257.725 314.648  1.00  0.00           C  
ATOM   2643  C   ASP X 165     207.445 257.118 316.016  1.00  0.00           C  
ATOM   2644  O   ASP X 165     208.577 257.419 316.401  1.00  0.00           O  
ATOM   2645  CB  ASP X 165     207.999 257.615 313.559  1.00  0.00           C  
ATOM   2646  CG  ASP X 165     208.542 256.204 313.368  1.00  0.00           C  
ATOM   2647  OD1 ASP X 165     207.918 255.251 313.889  1.00  0.00           O  
ATOM   2648  OD2 ASP X 165     209.683 255.964 312.826  1.00  0.00           O1-
ATOM   2649  H   ASP X 165     207.408 259.779 314.560  1.00  0.00           H  
ATOM   2650  HA  ASP X 165     206.003 257.327 314.358  1.00  0.00           H  
ATOM   2651  HB2 ASP X 165     207.587 258.034 312.641  1.00  0.00           H  
ATOM   2652  HB3 ASP X 165     208.854 258.250 313.791  1.00  0.00           H  
ATOM   2653  N   PRO X 166     206.733 256.107 316.524  1.00  0.00           N  
ATOM   2654  CA  PRO X 166     207.127 255.399 317.710  1.00  0.00           C  
ATOM   2655  C   PRO X 166     208.363 254.403 317.578  1.00  0.00           C  
ATOM   2656  O   PRO X 166     208.695 253.831 318.660  1.00  0.00           O  
ATOM   2657  CB  PRO X 166     205.843 254.784 318.311  1.00  0.00           C  
ATOM   2658  CG  PRO X 166     205.174 254.481 316.985  1.00  0.00           C  
ATOM   2659  CD  PRO X 166     205.357 255.767 316.236  1.00  0.00           C  
ATOM   2660  HA  PRO X 166     207.547 256.068 318.461  1.00  0.00           H  
ATOM   2661  HB2 PRO X 166     206.155 253.848 318.775  1.00  0.00           H  
ATOM   2662  HB3 PRO X 166     205.391 255.479 319.018  1.00  0.00           H  
ATOM   2663  HG2 PRO X 166     205.506 253.553 316.520  1.00  0.00           H  
ATOM   2664  HG3 PRO X 166     204.123 254.348 317.242  1.00  0.00           H  
ATOM   2665  HD2 PRO X 166     205.171 255.686 315.165  1.00  0.00           H  
ATOM   2666  HD3 PRO X 166     204.763 256.595 316.624  1.00  0.00           H  
ATOM   2667  N   THR X 167     208.849 254.071 316.384  1.00  0.00           N  
ATOM   2668  CA  THR X 167     209.489 252.768 316.197  1.00  0.00           C  
ATOM   2669  C   THR X 167     210.930 252.700 316.967  1.00  0.00           C  
ATOM   2670  O   THR X 167     211.237 251.698 317.582  1.00  0.00           O  
ATOM   2671  CB  THR X 167     209.754 252.443 314.725  1.00  0.00           C  
ATOM   2672  CG2 THR X 167     210.247 251.033 314.369  1.00  0.00           C  
ATOM   2673  OG1 THR X 167     208.558 252.598 314.030  1.00  0.00           O  
ATOM   2674  H   THR X 167     208.566 254.542 315.537  1.00  0.00           H  
ATOM   2675  HA  THR X 167     208.872 251.969 316.608  1.00  0.00           H  
ATOM   2676  HB  THR X 167     210.435 253.207 314.352  1.00  0.00           H  
ATOM   2677  HG1 THR X 167     208.400 253.531 313.866  1.00  0.00           H  
ATOM   2678 HG21 THR X 167     211.258 250.914 314.760  1.00  0.00           H  
ATOM   2679 HG22 THR X 167     210.229 250.927 313.284  1.00  0.00           H  
ATOM   2680 HG23 THR X 167     209.584 250.353 314.903  1.00  0.00           H  
ATOM   2681  N   PHE X 168     211.733 253.764 316.972  1.00  0.00           N  
ATOM   2682  CA  PHE X 168     213.032 253.790 317.735  1.00  0.00           C  
ATOM   2683  C   PHE X 168     212.741 253.782 319.251  1.00  0.00           C  
ATOM   2684  O   PHE X 168     213.276 253.004 319.985  1.00  0.00           O  
ATOM   2685  CB  PHE X 168     213.966 254.918 317.299  1.00  0.00           C  
ATOM   2686  CG  PHE X 168     215.327 254.806 317.911  1.00  0.00           C  
ATOM   2687  CD1 PHE X 168     215.686 255.503 319.105  1.00  0.00           C  
ATOM   2688  CD2 PHE X 168     216.225 253.950 317.292  1.00  0.00           C  
ATOM   2689  CE1 PHE X 168     216.974 255.429 319.620  1.00  0.00           C  
ATOM   2690  CE2 PHE X 168     217.516 253.818 317.883  1.00  0.00           C  
ATOM   2691  CZ  PHE X 168     217.885 254.547 319.004  1.00  0.00           C  
ATOM   2692  H   PHE X 168     211.611 254.534 316.330  1.00  0.00           H  
ATOM   2693  HA  PHE X 168     213.468 252.831 317.456  1.00  0.00           H  
ATOM   2694  HB2 PHE X 168     214.084 254.856 316.217  1.00  0.00           H  
ATOM   2695  HB3 PHE X 168     213.508 255.865 317.588  1.00  0.00           H  
ATOM   2696  HD1 PHE X 168     214.947 256.044 319.678  1.00  0.00           H  
ATOM   2697  HD2 PHE X 168     216.037 253.296 316.453  1.00  0.00           H  
ATOM   2698  HE1 PHE X 168     217.247 255.971 320.513  1.00  0.00           H  
ATOM   2699  HE2 PHE X 168     218.201 253.097 317.463  1.00  0.00           H  
ATOM   2700  HZ  PHE X 168     218.871 254.487 319.441  1.00  0.00           H  
ATOM   2701  N   ILE X 169     211.683 254.534 319.671  1.00  0.00           N  
ATOM   2702  CA  ILE X 169     211.215 254.554 321.054  1.00  0.00           C  
ATOM   2703  C   ILE X 169     210.781 253.201 321.518  1.00  0.00           C  
ATOM   2704  O   ILE X 169     211.133 252.720 322.610  1.00  0.00           O  
ATOM   2705  CB  ILE X 169     210.171 255.581 321.321  1.00  0.00           C  
ATOM   2706  CG1 ILE X 169     210.726 257.066 321.186  1.00  0.00           C  
ATOM   2707  CG2 ILE X 169     209.481 255.405 322.680  1.00  0.00           C  
ATOM   2708  CD1 ILE X 169     209.598 258.105 320.928  1.00  0.00           C  
ATOM   2709  H   ILE X 169     211.188 255.073 318.975  1.00  0.00           H  
ATOM   2710  HA  ILE X 169     212.064 254.770 321.704  1.00  0.00           H  
ATOM   2711  HB  ILE X 169     209.381 255.510 320.573  1.00  0.00           H  
ATOM   2712 HG12 ILE X 169     211.254 257.350 322.096  1.00  0.00           H  
ATOM   2713 HG13 ILE X 169     211.345 257.162 320.294  1.00  0.00           H  
ATOM   2714 HG21 ILE X 169     208.829 254.533 322.634  1.00  0.00           H  
ATOM   2715 HG22 ILE X 169     208.794 256.220 322.907  1.00  0.00           H  
ATOM   2716 HG23 ILE X 169     210.235 255.455 323.466  1.00  0.00           H  
ATOM   2717 HD11 ILE X 169     208.915 258.165 321.775  1.00  0.00           H  
ATOM   2718 HD12 ILE X 169     209.045 257.773 320.049  1.00  0.00           H  
ATOM   2719 HD13 ILE X 169     210.056 259.064 320.683  1.00  0.00           H  
ATOM   2720  N   LEU X 170     210.036 252.503 320.621  1.00  0.00           N  
ATOM   2721  CA  LEU X 170     209.533 251.192 320.982  1.00  0.00           C  
ATOM   2722  C   LEU X 170     210.575 250.065 320.890  1.00  0.00           C  
ATOM   2723  O   LEU X 170     210.321 249.021 321.540  1.00  0.00           O  
ATOM   2724  CB  LEU X 170     208.268 250.973 320.135  1.00  0.00           C  
ATOM   2725  CG  LEU X 170     206.963 251.692 320.610  1.00  0.00           C  
ATOM   2726  CD1 LEU X 170     205.718 251.148 319.936  1.00  0.00           C  
ATOM   2727  CD2 LEU X 170     206.584 251.340 322.135  1.00  0.00           C  
ATOM   2728  H   LEU X 170     209.730 252.920 319.753  1.00  0.00           H  
ATOM   2729  HA  LEU X 170     209.277 251.061 322.034  1.00  0.00           H  
ATOM   2730  HB2 LEU X 170     208.597 251.193 319.120  1.00  0.00           H  
ATOM   2731  HB3 LEU X 170     208.067 249.903 320.197  1.00  0.00           H  
ATOM   2732  HG  LEU X 170     206.983 252.775 320.484  1.00  0.00           H  
ATOM   2733 HD11 LEU X 170     204.836 251.788 319.949  1.00  0.00           H  
ATOM   2734 HD12 LEU X 170     205.466 250.172 320.351  1.00  0.00           H  
ATOM   2735 HD13 LEU X 170     206.000 250.953 318.902  1.00  0.00           H  
ATOM   2736 HD21 LEU X 170     206.429 250.269 322.269  1.00  0.00           H  
ATOM   2737 HD22 LEU X 170     207.426 251.608 322.774  1.00  0.00           H  
ATOM   2738 HD23 LEU X 170     205.671 251.790 322.526  1.00  0.00           H  
ATOM   2739  N   GLY X 171     211.683 250.301 320.158  1.00  0.00           N  
ATOM   2740  CA  GLY X 171     212.862 249.434 319.984  1.00  0.00           C  
ATOM   2741  C   GLY X 171     213.795 249.468 321.247  1.00  0.00           C  
ATOM   2742  O   GLY X 171     214.264 248.413 321.724  1.00  0.00           O  
ATOM   2743  H   GLY X 171     211.833 251.162 319.653  1.00  0.00           H  
ATOM   2744  HA2 GLY X 171     212.521 248.422 319.763  1.00  0.00           H  
ATOM   2745  HA3 GLY X 171     213.468 249.890 319.202  1.00  0.00           H  
ATOM   2746  N   CYS X 172     213.964 250.644 321.824  1.00  0.00           N  
ATOM   2747  CA  CYS X 172     214.964 250.817 322.859  1.00  0.00           C  
ATOM   2748  C   CYS X 172     214.578 250.270 324.251  1.00  0.00           C  
ATOM   2749  O   CYS X 172     215.460 250.009 325.061  1.00  0.00           O  
ATOM   2750  CB  CYS X 172     215.284 252.338 322.883  1.00  0.00           C  
ATOM   2751  SG  CYS X 172     215.994 252.685 321.269  1.00  0.00           S  
ATOM   2752  H   CYS X 172     213.485 251.455 321.460  1.00  0.00           H  
ATOM   2753  HA  CYS X 172     215.824 250.227 322.542  1.00  0.00           H  
ATOM   2754  HB2 CYS X 172     214.464 253.012 323.129  1.00  0.00           H  
ATOM   2755  HB3 CYS X 172     216.097 252.520 323.586  1.00  0.00           H  
ATOM   2756  HG  CYS X 172     214.987 253.335 320.678  1.00  0.00           H  
ATOM   2757  N   ALA X 173     213.325 250.111 324.553  1.00  0.00           N  
ATOM   2758  CA  ALA X 173     212.881 249.590 325.877  1.00  0.00           C  
ATOM   2759  C   ALA X 173     213.092 248.037 325.981  1.00  0.00           C  
ATOM   2760  O   ALA X 173     213.713 247.569 326.895  1.00  0.00           O  
ATOM   2761  CB  ALA X 173     211.514 250.039 326.358  1.00  0.00           C  
ATOM   2762  H   ALA X 173     212.594 250.355 323.899  1.00  0.00           H  
ATOM   2763  HA  ALA X 173     213.661 249.882 326.580  1.00  0.00           H  
ATOM   2764  HB1 ALA X 173     210.818 250.359 325.582  1.00  0.00           H  
ATOM   2765  HB2 ALA X 173     211.733 250.971 326.879  1.00  0.00           H  
ATOM   2766  HB3 ALA X 173     211.067 249.347 327.072  1.00  0.00           H  
ATOM   2767  N   PRO X 174     212.587 247.199 325.069  1.00  0.00           N  
ATOM   2768  CA  PRO X 174     213.006 245.787 325.096  1.00  0.00           C  
ATOM   2769  C   PRO X 174     214.546 245.615 325.023  1.00  0.00           C  
ATOM   2770  O   PRO X 174     214.954 244.689 325.649  1.00  0.00           O  
ATOM   2771  CB  PRO X 174     212.472 245.101 323.837  1.00  0.00           C  
ATOM   2772  CG  PRO X 174     211.479 246.071 323.145  1.00  0.00           C  
ATOM   2773  CD  PRO X 174     211.580 247.396 324.005  1.00  0.00           C  
ATOM   2774  HA  PRO X 174     212.699 245.394 326.066  1.00  0.00           H  
ATOM   2775  HB2 PRO X 174     213.232 244.721 323.154  1.00  0.00           H  
ATOM   2776  HB3 PRO X 174     211.849 244.223 324.012  1.00  0.00           H  
ATOM   2777  HG2 PRO X 174     211.966 246.191 322.178  1.00  0.00           H  
ATOM   2778  HG3 PRO X 174     210.439 245.746 323.103  1.00  0.00           H  
ATOM   2779  HD2 PRO X 174     211.789 248.254 323.366  1.00  0.00           H  
ATOM   2780  HD3 PRO X 174     210.676 247.589 324.583  1.00  0.00           H  
ATOM   2781  N   CYS X 175     215.314 246.445 324.336  1.00  0.00           N  
ATOM   2782  CA  CYS X 175     216.847 246.390 324.272  1.00  0.00           C  
ATOM   2783  C   CYS X 175     217.397 246.697 325.680  1.00  0.00           C  
ATOM   2784  O   CYS X 175     218.085 245.928 326.306  1.00  0.00           O  
ATOM   2785  CB  CYS X 175     217.361 247.419 323.247  1.00  0.00           C  
ATOM   2786  SG  CYS X 175     219.203 247.237 323.193  1.00  0.00           S  
ATOM   2787  H   CYS X 175     214.947 247.228 323.814  1.00  0.00           H  
ATOM   2788  HA  CYS X 175     217.152 245.363 324.072  1.00  0.00           H  
ATOM   2789  HB2 CYS X 175     216.879 247.260 322.283  1.00  0.00           H  
ATOM   2790  HB3 CYS X 175     217.062 248.365 323.699  1.00  0.00           H  
ATOM   2791  HG  CYS X 175     219.588 247.884 322.090  1.00  0.00           H  
ATOM   2792  N   ASN X 176     216.955 247.778 326.334  1.00  0.00           N  
ATOM   2793  CA  ASN X 176     217.283 248.028 327.736  1.00  0.00           C  
ATOM   2794  C   ASN X 176     216.869 246.934 328.700  1.00  0.00           C  
ATOM   2795  O   ASN X 176     217.631 246.698 329.640  1.00  0.00           O  
ATOM   2796  CB  ASN X 176     216.632 249.332 328.220  1.00  0.00           C  
ATOM   2797  CG  ASN X 176     217.523 250.494 327.976  1.00  0.00           C  
ATOM   2798  ND2 ASN X 176     217.222 251.438 327.099  1.00  0.00           N  
ATOM   2799  OD1 ASN X 176     218.498 250.600 328.719  1.00  0.00           O  
ATOM   2800  H   ASN X 176     216.455 248.441 325.758  1.00  0.00           H  
ATOM   2801  HA  ASN X 176     218.365 248.101 327.847  1.00  0.00           H  
ATOM   2802  HB2 ASN X 176     215.668 249.276 327.715  1.00  0.00           H  
ATOM   2803  HB3 ASN X 176     216.415 249.297 329.288  1.00  0.00           H  
ATOM   2804 HD21 ASN X 176     216.464 251.444 326.432  1.00  0.00           H  
ATOM   2805 HD22 ASN X 176     217.866 252.191 326.903  1.00  0.00           H  
ATOM   2806  N   VAL X 177     215.703 246.292 328.484  1.00  0.00           N  
ATOM   2807  CA  VAL X 177     215.388 245.072 329.243  1.00  0.00           C  
ATOM   2808  C   VAL X 177     216.452 243.964 328.996  1.00  0.00           C  
ATOM   2809  O   VAL X 177     216.952 243.361 329.959  1.00  0.00           O  
ATOM   2810  CB  VAL X 177     213.986 244.464 329.072  1.00  0.00           C  
ATOM   2811  CG1 VAL X 177     213.890 243.170 329.912  1.00  0.00           C  
ATOM   2812  CG2 VAL X 177     212.944 245.460 329.576  1.00  0.00           C  
ATOM   2813  H   VAL X 177     215.136 246.563 327.693  1.00  0.00           H  
ATOM   2814  HA  VAL X 177     215.545 245.402 330.270  1.00  0.00           H  
ATOM   2815  HB  VAL X 177     213.842 244.229 328.017  1.00  0.00           H  
ATOM   2816 HG11 VAL X 177     212.882 242.754 329.887  1.00  0.00           H  
ATOM   2817 HG12 VAL X 177     214.480 242.371 329.464  1.00  0.00           H  
ATOM   2818 HG13 VAL X 177     214.197 243.444 330.921  1.00  0.00           H  
ATOM   2819 HG21 VAL X 177     213.105 245.520 330.652  1.00  0.00           H  
ATOM   2820 HG22 VAL X 177     211.955 245.008 329.496  1.00  0.00           H  
ATOM   2821 HG23 VAL X 177     212.996 246.364 328.968  1.00  0.00           H  
ATOM   2822  N   ILE X 178     216.967 243.760 327.736  1.00  0.00           N  
ATOM   2823  CA  ILE X 178     218.125 242.865 327.410  1.00  0.00           C  
ATOM   2824  C   ILE X 178     219.460 243.288 328.039  1.00  0.00           C  
ATOM   2825  O   ILE X 178     220.142 242.455 328.592  1.00  0.00           O  
ATOM   2826  CB  ILE X 178     218.265 242.558 325.920  1.00  0.00           C  
ATOM   2827  CG1 ILE X 178     217.099 241.808 325.251  1.00  0.00           C  
ATOM   2828  CG2 ILE X 178     219.589 241.748 325.600  1.00  0.00           C  
ATOM   2829  CD1 ILE X 178     216.725 240.416 325.883  1.00  0.00           C  
ATOM   2830  H   ILE X 178     216.620 244.281 326.943  1.00  0.00           H  
ATOM   2831  HA  ILE X 178     218.013 241.882 327.868  1.00  0.00           H  
ATOM   2832  HB  ILE X 178     218.269 243.493 325.359  1.00  0.00           H  
ATOM   2833 HG12 ILE X 178     216.240 242.477 325.309  1.00  0.00           H  
ATOM   2834 HG13 ILE X 178     217.212 241.657 324.177  1.00  0.00           H  
ATOM   2835 HG21 ILE X 178     220.483 242.349 325.768  1.00  0.00           H  
ATOM   2836 HG22 ILE X 178     219.569 241.375 324.576  1.00  0.00           H  
ATOM   2837 HG23 ILE X 178     219.719 240.872 326.235  1.00  0.00           H  
ATOM   2838 HD11 ILE X 178     216.818 240.578 326.957  1.00  0.00           H  
ATOM   2839 HD12 ILE X 178     217.367 239.627 325.493  1.00  0.00           H  
ATOM   2840 HD13 ILE X 178     215.706 240.082 325.689  1.00  0.00           H  
ATOM   2841  N   CYS X 179     219.858 244.571 328.088  1.00  0.00           N  
ATOM   2842  CA  CYS X 179     220.998 244.983 328.857  1.00  0.00           C  
ATOM   2843  C   CYS X 179     220.861 244.592 330.366  1.00  0.00           C  
ATOM   2844  O   CYS X 179     221.848 244.167 330.976  1.00  0.00           O  
ATOM   2845  CB  CYS X 179     221.224 246.473 328.789  1.00  0.00           C  
ATOM   2846  SG  CYS X 179     221.321 246.952 326.988  1.00  0.00           S  
ATOM   2847  H   CYS X 179     219.224 245.228 327.656  1.00  0.00           H  
ATOM   2848  HA  CYS X 179     221.875 244.519 328.405  1.00  0.00           H  
ATOM   2849  HB2 CYS X 179     220.335 246.894 329.257  1.00  0.00           H  
ATOM   2850  HB3 CYS X 179     222.161 246.707 329.295  1.00  0.00           H  
ATOM   2851  HG  CYS X 179     220.152 247.596 327.047  1.00  0.00           H  
ATOM   2852  N   SER X 180     219.685 244.675 331.021  1.00  0.00           N  
ATOM   2853  CA  SER X 180     219.451 244.219 332.380  1.00  0.00           C  
ATOM   2854  C   SER X 180     219.644 242.707 332.599  1.00  0.00           C  
ATOM   2855  O   SER X 180     220.429 242.248 333.473  1.00  0.00           O  
ATOM   2856  CB  SER X 180     218.053 244.714 332.771  1.00  0.00           C  
ATOM   2857  OG  SER X 180     218.009 244.544 334.204  1.00  0.00           O  
ATOM   2858  H   SER X 180     218.925 244.864 330.383  1.00  0.00           H  
ATOM   2859  HA  SER X 180     220.146 244.764 333.018  1.00  0.00           H  
ATOM   2860  HB2 SER X 180     217.981 245.797 332.681  1.00  0.00           H  
ATOM   2861  HB3 SER X 180     217.219 244.163 332.336  1.00  0.00           H  
ATOM   2862  HG  SER X 180     218.322 245.342 334.638  1.00  0.00           H  
ATOM   2863  N   ILE X 181     219.042 241.880 331.714  1.00  0.00           N  
ATOM   2864  CA  ILE X 181     219.195 240.350 331.732  1.00  0.00           C  
ATOM   2865  C   ILE X 181     220.651 239.970 331.524  1.00  0.00           C  
ATOM   2866  O   ILE X 181     221.165 239.194 332.339  1.00  0.00           O  
ATOM   2867  CB  ILE X 181     218.282 239.801 330.636  1.00  0.00           C  
ATOM   2868  CG1 ILE X 181     216.835 239.934 331.038  1.00  0.00           C  
ATOM   2869  CG2 ILE X 181     218.562 238.341 330.407  1.00  0.00           C  
ATOM   2870  CD1 ILE X 181     215.859 239.764 329.946  1.00  0.00           C  
ATOM   2871  H   ILE X 181     218.419 242.345 331.069  1.00  0.00           H  
ATOM   2872  HA  ILE X 181     218.887 240.016 332.723  1.00  0.00           H  
ATOM   2873  HB  ILE X 181     218.367 240.257 329.650  1.00  0.00           H  
ATOM   2874 HG12 ILE X 181     216.668 239.128 331.753  1.00  0.00           H  
ATOM   2875 HG13 ILE X 181     216.645 240.908 331.488  1.00  0.00           H  
ATOM   2876 HG21 ILE X 181     219.532 238.243 329.919  1.00  0.00           H  
ATOM   2877 HG22 ILE X 181     217.772 237.874 329.820  1.00  0.00           H  
ATOM   2878 HG23 ILE X 181     218.574 237.858 331.384  1.00  0.00           H  
ATOM   2879 HD11 ILE X 181     216.047 240.512 329.176  1.00  0.00           H  
ATOM   2880 HD12 ILE X 181     214.870 239.710 330.401  1.00  0.00           H  
ATOM   2881 HD13 ILE X 181     215.995 238.765 329.533  1.00  0.00           H  
ATOM   2882  N   ILE X 182     221.352 240.489 330.510  1.00  0.00           N  
ATOM   2883  CA  ILE X 182     222.673 240.049 330.085  1.00  0.00           C  
ATOM   2884  C   ILE X 182     223.833 240.543 330.940  1.00  0.00           C  
ATOM   2885  O   ILE X 182     224.784 239.804 331.259  1.00  0.00           O  
ATOM   2886  CB  ILE X 182     222.854 240.405 328.553  1.00  0.00           C  
ATOM   2887  CG1 ILE X 182     221.732 239.787 327.679  1.00  0.00           C  
ATOM   2888  CG2 ILE X 182     224.332 240.106 328.031  1.00  0.00           C  
ATOM   2889  CD1 ILE X 182     222.034 238.230 327.445  1.00  0.00           C  
ATOM   2890  H   ILE X 182     220.951 241.110 329.821  1.00  0.00           H  
ATOM   2891  HA  ILE X 182     222.775 238.966 330.147  1.00  0.00           H  
ATOM   2892  HB  ILE X 182     222.699 241.484 328.532  1.00  0.00           H  
ATOM   2893 HG12 ILE X 182     220.716 239.888 328.060  1.00  0.00           H  
ATOM   2894 HG13 ILE X 182     221.799 240.215 326.679  1.00  0.00           H  
ATOM   2895 HG21 ILE X 182     224.357 239.998 326.947  1.00  0.00           H  
ATOM   2896 HG22 ILE X 182     224.680 239.198 328.524  1.00  0.00           H  
ATOM   2897 HG23 ILE X 182     225.040 240.912 328.224  1.00  0.00           H  
ATOM   2898 HD11 ILE X 182     221.783 237.627 328.318  1.00  0.00           H  
ATOM   2899 HD12 ILE X 182     222.984 237.983 326.972  1.00  0.00           H  
ATOM   2900 HD13 ILE X 182     221.286 237.949 326.703  1.00  0.00           H  
ATOM   2901  N   PHE X 183     223.841 241.844 331.311  1.00  0.00           N  
ATOM   2902  CA  PHE X 183     224.946 242.510 331.920  1.00  0.00           C  
ATOM   2903  C   PHE X 183     224.622 243.651 332.887  1.00  0.00           C  
ATOM   2904  O   PHE X 183     225.534 244.374 333.214  1.00  0.00           O  
ATOM   2905  CB  PHE X 183     225.933 242.814 330.793  1.00  0.00           C  
ATOM   2906  CG  PHE X 183     225.607 244.132 330.008  1.00  0.00           C  
ATOM   2907  CD1 PHE X 183     226.266 245.286 330.319  1.00  0.00           C  
ATOM   2908  CD2 PHE X 183     224.706 244.147 328.901  1.00  0.00           C  
ATOM   2909  CE1 PHE X 183     226.257 246.463 329.544  1.00  0.00           C  
ATOM   2910  CE2 PHE X 183     224.553 245.396 328.167  1.00  0.00           C  
ATOM   2911  CZ  PHE X 183     225.381 246.490 328.431  1.00  0.00           C  
ATOM   2912  H   PHE X 183     223.205 242.368 330.728  1.00  0.00           H  
ATOM   2913  HA  PHE X 183     225.558 241.849 332.534  1.00  0.00           H  
ATOM   2914  HB2 PHE X 183     226.876 242.971 331.317  1.00  0.00           H  
ATOM   2915  HB3 PHE X 183     226.114 241.954 330.147  1.00  0.00           H  
ATOM   2916  HD1 PHE X 183     226.938 245.208 331.162  1.00  0.00           H  
ATOM   2917  HD2 PHE X 183     224.114 243.281 328.643  1.00  0.00           H  
ATOM   2918  HE1 PHE X 183     226.852 247.345 329.730  1.00  0.00           H  
ATOM   2919  HE2 PHE X 183     223.930 245.622 327.314  1.00  0.00           H  
ATOM   2920  HZ  PHE X 183     225.551 247.322 327.765  1.00  0.00           H  
ATOM   2921  N   HID X 184     223.351 243.762 333.357  1.00  0.00           N  
ATOM   2922  CA  HID X 184     222.947 244.567 334.542  1.00  0.00           C  
ATOM   2923  C   HID X 184     223.400 246.066 334.464  1.00  0.00           C  
ATOM   2924  O   HID X 184     223.886 246.697 335.403  1.00  0.00           O  
ATOM   2925  CB  HID X 184     223.344 243.790 335.829  1.00  0.00           C  
ATOM   2926  CG  HID X 184     222.753 244.278 337.168  1.00  0.00           C  
ATOM   2927  CD2 HID X 184     222.083 243.462 338.076  1.00  0.00           C  
ATOM   2928  ND1 HID X 184     222.821 245.539 337.770  1.00  0.00           N  
ATOM   2929  CE1 HID X 184     222.087 245.462 338.901  1.00  0.00           C  
ATOM   2930  NE2 HID X 184     221.654 244.201 339.169  1.00  0.00           N  
ATOM   2931  H   HID X 184     222.620 243.243 332.892  1.00  0.00           H  
ATOM   2932  HA  HID X 184     221.858 244.536 334.505  1.00  0.00           H  
ATOM   2933  HB2 HID X 184     222.977 242.772 335.698  1.00  0.00           H  
ATOM   2934  HB3 HID X 184     224.430 243.699 335.801  1.00  0.00           H  
ATOM   2935  HD1 HID X 184     223.176 246.418 337.422  1.00  0.00           H  
ATOM   2936  HD2 HID X 184     221.866 242.419 337.901  1.00  0.00           H  
ATOM   2937  HE1 HID X 184     221.772 246.307 339.496  1.00  0.00           H  
ATOM   2938  N   LYS X 185     223.159 246.700 333.310  1.00  0.00           N  
ATOM   2939  CA  LYS X 185     223.168 248.177 333.052  1.00  0.00           C  
ATOM   2940  C   LYS X 185     221.904 248.541 332.311  1.00  0.00           C  
ATOM   2941  O   LYS X 185     221.639 247.837 331.370  1.00  0.00           O  
ATOM   2942  CB  LYS X 185     224.539 248.609 332.469  1.00  0.00           C  
ATOM   2943  CG  LYS X 185     224.643 250.097 332.642  1.00  0.00           C  
ATOM   2944  CD  LYS X 185     225.930 250.726 332.148  1.00  0.00           C  
ATOM   2945  CE  LYS X 185     226.000 252.095 332.716  1.00  0.00           C  
ATOM   2946  NZ  LYS X 185     224.902 252.992 332.360  1.00  0.00           N1+
ATOM   2947  H   LYS X 185     223.092 246.156 332.462  1.00  0.00           H  
ATOM   2948  HA  LYS X 185     223.147 248.653 334.033  1.00  0.00           H  
ATOM   2949  HB2 LYS X 185     225.352 248.082 332.968  1.00  0.00           H  
ATOM   2950  HB3 LYS X 185     224.576 248.309 331.422  1.00  0.00           H  
ATOM   2951  HG2 LYS X 185     223.765 250.460 332.109  1.00  0.00           H  
ATOM   2952  HG3 LYS X 185     224.622 250.383 333.693  1.00  0.00           H  
ATOM   2953  HD2 LYS X 185     226.749 250.106 332.514  1.00  0.00           H  
ATOM   2954  HD3 LYS X 185     226.065 250.750 331.066  1.00  0.00           H  
ATOM   2955  HE2 LYS X 185     226.224 252.097 333.783  1.00  0.00           H  
ATOM   2956  HE3 LYS X 185     226.891 252.514 332.249  1.00  0.00           H  
ATOM   2957  HZ1 LYS X 185     224.937 253.779 332.993  1.00  0.00           H  
ATOM   2958  HZ2 LYS X 185     224.006 252.548 332.498  1.00  0.00           H  
ATOM   2959  HZ3 LYS X 185     224.951 253.507 331.492  1.00  0.00           H  
ATOM   2960  N   ARG X 186     221.315 249.690 332.566  1.00  0.00           N  
ATOM   2961  CA  ARG X 186     220.430 250.354 331.613  1.00  0.00           C  
ATOM   2962  C   ARG X 186     221.009 251.747 331.270  1.00  0.00           C  
ATOM   2963  O   ARG X 186     221.947 252.360 331.863  1.00  0.00           O  
ATOM   2964  CB  ARG X 186     219.007 250.355 332.133  1.00  0.00           C  
ATOM   2965  CG  ARG X 186     218.394 249.037 332.623  1.00  0.00           C  
ATOM   2966  CD  ARG X 186     217.160 249.203 333.508  1.00  0.00           C  
ATOM   2967  NE  ARG X 186     217.221 250.313 334.447  1.00  0.00           N  
ATOM   2968  CZ  ARG X 186     217.406 250.403 335.718  1.00  0.00           C  
ATOM   2969  NH1 ARG X 186     217.376 249.309 336.386  1.00  0.00           N1+
ATOM   2970  NH2 ARG X 186     217.511 251.558 336.339  1.00  0.00           N  
ATOM   2971  H   ARG X 186     221.655 250.135 333.407  1.00  0.00           H  
ATOM   2972  HA  ARG X 186     220.424 249.770 330.692  1.00  0.00           H  
ATOM   2973  HB2 ARG X 186     219.088 251.079 332.943  1.00  0.00           H  
ATOM   2974  HB3 ARG X 186     218.452 250.911 331.378  1.00  0.00           H  
ATOM   2975  HG2 ARG X 186     218.303 248.293 331.832  1.00  0.00           H  
ATOM   2976  HG3 ARG X 186     219.143 248.753 333.362  1.00  0.00           H  
ATOM   2977  HD2 ARG X 186     216.248 249.295 332.919  1.00  0.00           H  
ATOM   2978  HD3 ARG X 186     216.894 248.291 334.042  1.00  0.00           H  
ATOM   2979  HE  ARG X 186     217.095 251.218 334.017  1.00  0.00           H  
ATOM   2980 HH11 ARG X 186     217.323 248.478 335.814  1.00  0.00           H  
ATOM   2981 HH12 ARG X 186     217.738 249.248 337.327  1.00  0.00           H  
ATOM   2982 HH21 ARG X 186     217.516 252.417 335.808  1.00  0.00           H  
ATOM   2983 HH22 ARG X 186     217.581 251.611 337.345  1.00  0.00           H  
ATOM   2984  N   PHE X 187     220.523 252.298 330.188  1.00  0.00           N  
ATOM   2985  CA  PHE X 187     220.859 253.528 329.547  1.00  0.00           C  
ATOM   2986  C   PHE X 187     219.540 254.299 329.277  1.00  0.00           C  
ATOM   2987  O   PHE X 187     218.399 253.809 329.368  1.00  0.00           O  
ATOM   2988  CB  PHE X 187     221.592 253.288 328.222  1.00  0.00           C  
ATOM   2989  CG  PHE X 187     222.904 252.460 328.375  1.00  0.00           C  
ATOM   2990  CD1 PHE X 187     224.149 253.102 328.330  1.00  0.00           C  
ATOM   2991  CD2 PHE X 187     222.768 251.033 328.420  1.00  0.00           C  
ATOM   2992  CE1 PHE X 187     225.271 252.311 328.304  1.00  0.00           C  
ATOM   2993  CE2 PHE X 187     223.958 250.267 328.464  1.00  0.00           C  
ATOM   2994  CZ  PHE X 187     225.223 250.884 328.344  1.00  0.00           C  
ATOM   2995  H   PHE X 187     219.792 251.751 329.756  1.00  0.00           H  
ATOM   2996  HA  PHE X 187     221.509 254.122 330.188  1.00  0.00           H  
ATOM   2997  HB2 PHE X 187     220.943 252.785 327.507  1.00  0.00           H  
ATOM   2998  HB3 PHE X 187     221.938 254.250 327.844  1.00  0.00           H  
ATOM   2999  HD1 PHE X 187     224.263 254.173 328.244  1.00  0.00           H  
ATOM   3000  HD2 PHE X 187     221.788 250.592 328.531  1.00  0.00           H  
ATOM   3001  HE1 PHE X 187     226.246 252.775 328.338  1.00  0.00           H  
ATOM   3002  HE2 PHE X 187     223.886 249.195 328.566  1.00  0.00           H  
ATOM   3003  HZ  PHE X 187     226.168 250.362 328.329  1.00  0.00           H  
ATOM   3004  N   ASP X 188     219.710 255.591 329.005  1.00  0.00           N  
ATOM   3005  CA  ASP X 188     218.729 256.395 328.263  1.00  0.00           C  
ATOM   3006  C   ASP X 188     219.017 256.270 326.754  1.00  0.00           C  
ATOM   3007  O   ASP X 188     220.101 256.022 326.251  1.00  0.00           O  
ATOM   3008  CB  ASP X 188     218.645 257.878 328.633  1.00  0.00           C  
ATOM   3009  CG  ASP X 188     218.235 258.057 329.982  1.00  0.00           C  
ATOM   3010  OD1 ASP X 188     218.213 257.169 330.880  1.00  0.00           O  
ATOM   3011  OD2 ASP X 188     217.859 259.217 330.291  1.00  0.00           O1-
ATOM   3012  H   ASP X 188     220.638 255.989 328.982  1.00  0.00           H  
ATOM   3013  HA  ASP X 188     217.782 255.877 328.418  1.00  0.00           H  
ATOM   3014  HB2 ASP X 188     219.660 258.256 328.512  1.00  0.00           H  
ATOM   3015  HB3 ASP X 188     217.986 258.356 327.908  1.00  0.00           H  
ATOM   3016  N   TYR X 189     217.896 256.414 325.975  1.00  0.00           N  
ATOM   3017  CA  TYR X 189     217.849 256.034 324.519  1.00  0.00           C  
ATOM   3018  C   TYR X 189     218.578 257.006 323.570  1.00  0.00           C  
ATOM   3019  O   TYR X 189     218.542 256.733 322.345  1.00  0.00           O  
ATOM   3020  CB  TYR X 189     216.364 255.875 324.178  1.00  0.00           C  
ATOM   3021  CG  TYR X 189     215.336 255.188 325.115  1.00  0.00           C  
ATOM   3022  CD1 TYR X 189     214.033 255.571 325.062  1.00  0.00           C  
ATOM   3023  CD2 TYR X 189     215.735 254.132 326.000  1.00  0.00           C  
ATOM   3024  CE1 TYR X 189     213.126 254.993 325.927  1.00  0.00           C  
ATOM   3025  CE2 TYR X 189     214.787 253.545 326.873  1.00  0.00           C  
ATOM   3026  CZ  TYR X 189     213.488 254.034 326.870  1.00  0.00           C  
ATOM   3027  OH  TYR X 189     212.591 253.441 327.682  1.00  0.00           O  
ATOM   3028  H   TYR X 189     217.016 256.679 326.392  1.00  0.00           H  
ATOM   3029  HA  TYR X 189     218.313 255.068 324.319  1.00  0.00           H  
ATOM   3030  HB2 TYR X 189     215.932 256.802 323.801  1.00  0.00           H  
ATOM   3031  HB3 TYR X 189     216.338 255.193 323.327  1.00  0.00           H  
ATOM   3032  HD1 TYR X 189     213.819 256.328 324.322  1.00  0.00           H  
ATOM   3033  HD2 TYR X 189     216.762 253.802 326.056  1.00  0.00           H  
ATOM   3034  HE1 TYR X 189     212.120 255.361 326.062  1.00  0.00           H  
ATOM   3035  HE2 TYR X 189     215.094 252.705 327.479  1.00  0.00           H  
ATOM   3036  HH  TYR X 189     213.052 252.692 328.065  1.00  0.00           H  
ATOM   3037  N   LYS X 190     219.235 258.115 324.008  1.00  0.00           N  
ATOM   3038  CA  LYS X 190     220.178 259.040 323.395  1.00  0.00           C  
ATOM   3039  C   LYS X 190     221.638 259.001 323.974  1.00  0.00           C  
ATOM   3040  O   LYS X 190     222.406 259.914 323.719  1.00  0.00           O  
ATOM   3041  CB  LYS X 190     219.457 260.421 323.453  1.00  0.00           C  
ATOM   3042  CG  LYS X 190     218.643 260.624 322.152  1.00  0.00           C  
ATOM   3043  CD  LYS X 190     217.545 261.650 322.294  1.00  0.00           C  
ATOM   3044  CE  LYS X 190     216.687 261.688 321.036  1.00  0.00           C  
ATOM   3045  NZ  LYS X 190     215.376 262.328 321.171  1.00  0.00           N1+
ATOM   3046  H   LYS X 190     219.109 258.208 325.006  1.00  0.00           H  
ATOM   3047  HA  LYS X 190     220.385 258.730 322.370  1.00  0.00           H  
ATOM   3048  HB2 LYS X 190     218.857 260.536 324.355  1.00  0.00           H  
ATOM   3049  HB3 LYS X 190     220.233 261.183 323.379  1.00  0.00           H  
ATOM   3050  HG2 LYS X 190     219.237 260.901 321.282  1.00  0.00           H  
ATOM   3051  HG3 LYS X 190     218.176 259.676 321.887  1.00  0.00           H  
ATOM   3052  HD2 LYS X 190     216.905 261.476 323.159  1.00  0.00           H  
ATOM   3053  HD3 LYS X 190     218.005 262.597 322.576  1.00  0.00           H  
ATOM   3054  HE2 LYS X 190     217.262 262.099 320.207  1.00  0.00           H  
ATOM   3055  HE3 LYS X 190     216.387 260.723 320.627  1.00  0.00           H  
ATOM   3056  HZ1 LYS X 190     214.839 261.935 321.930  1.00  0.00           H  
ATOM   3057  HZ2 LYS X 190     214.968 262.257 320.250  1.00  0.00           H  
ATOM   3058  HZ3 LYS X 190     215.354 263.328 321.312  1.00  0.00           H  
ATOM   3059  N   ASP X 191     221.924 258.121 324.964  1.00  0.00           N  
ATOM   3060  CA  ASP X 191     223.269 257.770 325.521  1.00  0.00           C  
ATOM   3061  C   ASP X 191     224.062 257.142 324.411  1.00  0.00           C  
ATOM   3062  O   ASP X 191     223.634 256.238 323.723  1.00  0.00           O  
ATOM   3063  CB  ASP X 191     223.200 256.896 326.776  1.00  0.00           C  
ATOM   3064  CG  ASP X 191     222.445 257.554 327.926  1.00  0.00           C  
ATOM   3065  OD1 ASP X 191     222.241 258.789 327.846  1.00  0.00           O  
ATOM   3066  OD2 ASP X 191     222.082 256.989 328.981  1.00  0.00           O1-
ATOM   3067  H   ASP X 191     221.257 257.457 325.331  1.00  0.00           H  
ATOM   3068  HA  ASP X 191     223.838 258.652 325.815  1.00  0.00           H  
ATOM   3069  HB2 ASP X 191     222.658 255.982 326.531  1.00  0.00           H  
ATOM   3070  HB3 ASP X 191     224.203 256.704 327.155  1.00  0.00           H  
ATOM   3071  N   GLN X 192     225.227 257.768 324.151  1.00  0.00           N  
ATOM   3072  CA  GLN X 192     226.037 257.620 322.947  1.00  0.00           C  
ATOM   3073  C   GLN X 192     226.367 256.124 322.811  1.00  0.00           C  
ATOM   3074  O   GLN X 192     226.090 255.537 321.761  1.00  0.00           O  
ATOM   3075  CB  GLN X 192     227.122 258.662 322.950  1.00  0.00           C  
ATOM   3076  CG  GLN X 192     226.689 260.144 322.888  1.00  0.00           C  
ATOM   3077  CD  GLN X 192     227.831 261.054 323.334  1.00  0.00           C  
ATOM   3078  NE2 GLN X 192     227.690 262.364 323.188  1.00  0.00           N  
ATOM   3079  OE1 GLN X 192     228.912 260.629 323.744  1.00  0.00           O  
ATOM   3080  H   GLN X 192     225.549 258.493 324.775  1.00  0.00           H  
ATOM   3081  HA  GLN X 192     225.418 257.695 322.053  1.00  0.00           H  
ATOM   3082  HB2 GLN X 192     227.858 258.462 323.729  1.00  0.00           H  
ATOM   3083  HB3 GLN X 192     227.672 258.427 322.038  1.00  0.00           H  
ATOM   3084  HG2 GLN X 192     226.399 260.348 321.857  1.00  0.00           H  
ATOM   3085  HG3 GLN X 192     225.818 260.343 323.512  1.00  0.00           H  
ATOM   3086 HE21 GLN X 192     228.589 262.803 323.324  1.00  0.00           H  
ATOM   3087 HE22 GLN X 192     226.843 262.887 323.015  1.00  0.00           H  
ATOM   3088  N   GLN X 193     226.903 255.507 323.843  1.00  0.00           N  
ATOM   3089  CA  GLN X 193     227.365 254.055 323.834  1.00  0.00           C  
ATOM   3090  C   GLN X 193     226.239 253.046 323.748  1.00  0.00           C  
ATOM   3091  O   GLN X 193     226.400 251.894 323.315  1.00  0.00           O  
ATOM   3092  CB  GLN X 193     228.035 253.734 325.214  1.00  0.00           C  
ATOM   3093  CG  GLN X 193     228.853 252.449 325.267  1.00  0.00           C  
ATOM   3094  CD  GLN X 193     230.093 252.546 324.392  1.00  0.00           C  
ATOM   3095  NE2 GLN X 193     231.159 253.033 324.955  1.00  0.00           N  
ATOM   3096  OE1 GLN X 193     230.016 252.206 323.197  1.00  0.00           O  
ATOM   3097  H   GLN X 193     227.156 256.074 324.640  1.00  0.00           H  
ATOM   3098  HA  GLN X 193     227.978 253.862 322.954  1.00  0.00           H  
ATOM   3099  HB2 GLN X 193     228.731 254.561 325.358  1.00  0.00           H  
ATOM   3100  HB3 GLN X 193     227.210 253.780 325.924  1.00  0.00           H  
ATOM   3101  HG2 GLN X 193     229.192 252.269 326.287  1.00  0.00           H  
ATOM   3102  HG3 GLN X 193     228.282 251.573 324.962  1.00  0.00           H  
ATOM   3103 HE21 GLN X 193     231.976 253.251 324.401  1.00  0.00           H  
ATOM   3104 HE22 GLN X 193     231.227 253.212 325.946  1.00  0.00           H  
ATOM   3105  N   PHE X 194     224.984 253.542 323.979  1.00  0.00           N  
ATOM   3106  CA  PHE X 194     223.815 252.805 323.571  1.00  0.00           C  
ATOM   3107  C   PHE X 194     223.571 252.852 322.113  1.00  0.00           C  
ATOM   3108  O   PHE X 194     223.252 251.807 321.502  1.00  0.00           O  
ATOM   3109  CB  PHE X 194     222.584 253.103 324.462  1.00  0.00           C  
ATOM   3110  CG  PHE X 194     221.305 252.269 324.092  1.00  0.00           C  
ATOM   3111  CD1 PHE X 194     220.994 251.061 324.748  1.00  0.00           C  
ATOM   3112  CD2 PHE X 194     220.465 252.835 323.063  1.00  0.00           C  
ATOM   3113  CE1 PHE X 194     219.700 250.478 324.519  1.00  0.00           C  
ATOM   3114  CE2 PHE X 194     219.233 252.198 322.805  1.00  0.00           C  
ATOM   3115  CZ  PHE X 194     218.805 251.059 323.516  1.00  0.00           C  
ATOM   3116  H   PHE X 194     224.912 254.536 324.140  1.00  0.00           H  
ATOM   3117  HA  PHE X 194     224.112 251.779 323.789  1.00  0.00           H  
ATOM   3118  HB2 PHE X 194     222.823 252.932 325.512  1.00  0.00           H  
ATOM   3119  HB3 PHE X 194     222.442 254.183 324.480  1.00  0.00           H  
ATOM   3120  HD1 PHE X 194     221.729 250.647 325.423  1.00  0.00           H  
ATOM   3121  HD2 PHE X 194     220.816 253.706 322.528  1.00  0.00           H  
ATOM   3122  HE1 PHE X 194     219.360 249.657 325.133  1.00  0.00           H  
ATOM   3123  HE2 PHE X 194     218.601 252.590 322.022  1.00  0.00           H  
ATOM   3124  HZ  PHE X 194     217.829 250.611 323.401  1.00  0.00           H  
ATOM   3125  N   LEU X 195     223.660 254.007 321.418  1.00  0.00           N  
ATOM   3126  CA  LEU X 195     223.478 254.079 319.986  1.00  0.00           C  
ATOM   3127  C   LEU X 195     224.563 253.411 319.153  1.00  0.00           C  
ATOM   3128  O   LEU X 195     224.236 252.815 318.121  1.00  0.00           O  
ATOM   3129  CB  LEU X 195     223.420 255.550 319.548  1.00  0.00           C  
ATOM   3130  CG  LEU X 195     222.512 256.530 320.308  1.00  0.00           C  
ATOM   3131  CD1 LEU X 195     222.593 257.999 319.821  1.00  0.00           C  
ATOM   3132  CD2 LEU X 195     221.067 256.007 320.227  1.00  0.00           C  
ATOM   3133  H   LEU X 195     224.168 254.718 321.925  1.00  0.00           H  
ATOM   3134  HA  LEU X 195     222.552 253.562 319.735  1.00  0.00           H  
ATOM   3135  HB2 LEU X 195     224.427 255.937 319.705  1.00  0.00           H  
ATOM   3136  HB3 LEU X 195     223.094 255.532 318.508  1.00  0.00           H  
ATOM   3137  HG  LEU X 195     222.808 256.443 321.353  1.00  0.00           H  
ATOM   3138 HD11 LEU X 195     222.174 258.683 320.559  1.00  0.00           H  
ATOM   3139 HD12 LEU X 195     222.141 258.198 318.849  1.00  0.00           H  
ATOM   3140 HD13 LEU X 195     223.618 258.369 319.790  1.00  0.00           H  
ATOM   3141 HD21 LEU X 195     220.783 255.796 319.196  1.00  0.00           H  
ATOM   3142 HD22 LEU X 195     220.915 255.086 320.791  1.00  0.00           H  
ATOM   3143 HD23 LEU X 195     220.436 256.739 320.731  1.00  0.00           H  
ATOM   3144  N   ASN X 196     225.771 253.432 319.689  1.00  0.00           N  
ATOM   3145  CA  ASN X 196     226.864 252.607 319.146  1.00  0.00           C  
ATOM   3146  C   ASN X 196     226.498 251.119 318.909  1.00  0.00           C  
ATOM   3147  O   ASN X 196     227.012 250.512 317.987  1.00  0.00           O  
ATOM   3148  CB  ASN X 196     227.987 252.576 320.120  1.00  0.00           C  
ATOM   3149  CG  ASN X 196     229.312 252.013 319.582  1.00  0.00           C  
ATOM   3150  ND2 ASN X 196     230.255 251.499 320.328  1.00  0.00           N  
ATOM   3151  OD1 ASN X 196     229.530 252.004 318.411  1.00  0.00           O  
ATOM   3152  H   ASN X 196     225.953 254.041 320.475  1.00  0.00           H  
ATOM   3153  HA  ASN X 196     227.187 253.091 318.224  1.00  0.00           H  
ATOM   3154  HB2 ASN X 196     228.278 253.606 320.322  1.00  0.00           H  
ATOM   3155  HB3 ASN X 196     227.762 252.047 321.047  1.00  0.00           H  
ATOM   3156 HD21 ASN X 196     230.207 251.661 321.324  1.00  0.00           H  
ATOM   3157 HD22 ASN X 196     231.048 251.074 319.869  1.00  0.00           H  
ATOM   3158  N   LEU X 197     225.766 250.509 319.794  1.00  0.00           N  
ATOM   3159  CA  LEU X 197     225.054 249.283 319.671  1.00  0.00           C  
ATOM   3160  C   LEU X 197     223.719 249.353 318.853  1.00  0.00           C  
ATOM   3161  O   LEU X 197     223.533 248.678 317.855  1.00  0.00           O  
ATOM   3162  CB  LEU X 197     224.999 248.717 321.111  1.00  0.00           C  
ATOM   3163  CG  LEU X 197     223.975 247.552 321.244  1.00  0.00           C  
ATOM   3164  CD1 LEU X 197     224.620 246.384 320.570  1.00  0.00           C  
ATOM   3165  CD2 LEU X 197     223.786 247.246 322.680  1.00  0.00           C  
ATOM   3166  H   LEU X 197     225.444 251.072 320.569  1.00  0.00           H  
ATOM   3167  HA  LEU X 197     225.762 248.608 319.189  1.00  0.00           H  
ATOM   3168  HB2 LEU X 197     226.022 248.482 321.404  1.00  0.00           H  
ATOM   3169  HB3 LEU X 197     224.601 249.501 321.755  1.00  0.00           H  
ATOM   3170  HG  LEU X 197     222.997 247.785 320.822  1.00  0.00           H  
ATOM   3171 HD11 LEU X 197     224.705 246.612 319.508  1.00  0.00           H  
ATOM   3172 HD12 LEU X 197     224.018 245.486 320.709  1.00  0.00           H  
ATOM   3173 HD13 LEU X 197     225.653 246.233 320.885  1.00  0.00           H  
ATOM   3174 HD21 LEU X 197     223.315 248.019 323.286  1.00  0.00           H  
ATOM   3175 HD22 LEU X 197     223.026 246.467 322.740  1.00  0.00           H  
ATOM   3176 HD23 LEU X 197     224.749 247.002 323.129  1.00  0.00           H  
ATOM   3177  N   MET X 198     222.707 250.127 319.269  1.00  0.00           N  
ATOM   3178  CA  MET X 198     221.247 249.966 318.865  1.00  0.00           C  
ATOM   3179  C   MET X 198     221.043 250.279 317.361  1.00  0.00           C  
ATOM   3180  O   MET X 198     220.457 249.430 316.614  1.00  0.00           O  
ATOM   3181  CB  MET X 198     220.377 250.822 319.757  1.00  0.00           C  
ATOM   3182  CG  MET X 198     218.870 250.656 319.411  1.00  0.00           C  
ATOM   3183  SD  MET X 198     218.107 249.025 320.056  1.00  0.00           S  
ATOM   3184  CE  MET X 198     216.468 249.007 319.262  1.00  0.00           C  
ATOM   3185  H   MET X 198     222.816 250.542 320.183  1.00  0.00           H  
ATOM   3186  HA  MET X 198     220.858 248.968 319.068  1.00  0.00           H  
ATOM   3187  HB2 MET X 198     220.487 250.406 320.759  1.00  0.00           H  
ATOM   3188  HB3 MET X 198     220.628 251.881 319.703  1.00  0.00           H  
ATOM   3189  HG2 MET X 198     218.247 251.490 319.735  1.00  0.00           H  
ATOM   3190  HG3 MET X 198     218.789 250.612 318.325  1.00  0.00           H  
ATOM   3191  HE1 MET X 198     216.013 249.859 319.767  1.00  0.00           H  
ATOM   3192  HE2 MET X 198     216.363 249.226 318.199  1.00  0.00           H  
ATOM   3193  HE3 MET X 198     215.899 248.128 319.567  1.00  0.00           H  
ATOM   3194  N   GLU X 199     221.661 251.351 316.896  1.00  0.00           N  
ATOM   3195  CA  GLU X 199     221.649 251.642 315.395  1.00  0.00           C  
ATOM   3196  C   GLU X 199     222.253 250.555 314.501  1.00  0.00           C  
ATOM   3197  O   GLU X 199     221.591 250.054 313.584  1.00  0.00           O  
ATOM   3198  CB  GLU X 199     222.377 252.972 315.113  1.00  0.00           C  
ATOM   3199  CG  GLU X 199     221.575 254.191 315.535  1.00  0.00           C  
ATOM   3200  CD  GLU X 199     220.303 254.492 314.727  1.00  0.00           C  
ATOM   3201  OE1 GLU X 199     219.736 255.609 314.901  1.00  0.00           O  
ATOM   3202  OE2 GLU X 199     219.876 253.620 313.921  1.00  0.00           O1-
ATOM   3203  H   GLU X 199     222.298 251.828 317.518  1.00  0.00           H  
ATOM   3204  HA  GLU X 199     220.620 251.802 315.072  1.00  0.00           H  
ATOM   3205  HB2 GLU X 199     223.341 252.895 315.617  1.00  0.00           H  
ATOM   3206  HB3 GLU X 199     222.469 253.015 314.027  1.00  0.00           H  
ATOM   3207  HG2 GLU X 199     221.394 254.211 316.609  1.00  0.00           H  
ATOM   3208  HG3 GLU X 199     222.250 255.040 315.420  1.00  0.00           H  
ATOM   3209  N   LYS X 200     223.449 250.096 314.842  1.00  0.00           N  
ATOM   3210  CA  LYS X 200     224.075 248.824 314.245  1.00  0.00           C  
ATOM   3211  C   LYS X 200     223.217 247.590 314.442  1.00  0.00           C  
ATOM   3212  O   LYS X 200     223.346 246.714 313.595  1.00  0.00           O  
ATOM   3213  CB  LYS X 200     225.430 248.456 314.942  1.00  0.00           C  
ATOM   3214  CG  LYS X 200     226.373 249.533 314.501  1.00  0.00           C  
ATOM   3215  CD  LYS X 200     227.771 249.275 314.967  1.00  0.00           C  
ATOM   3216  CE  LYS X 200     228.824 250.363 314.779  1.00  0.00           C  
ATOM   3217  NZ  LYS X 200     228.566 251.433 315.790  1.00  0.00           N1+
ATOM   3218  H   LYS X 200     223.965 250.554 315.579  1.00  0.00           H  
ATOM   3219  HA  LYS X 200     224.202 248.882 313.164  1.00  0.00           H  
ATOM   3220  HB2 LYS X 200     225.356 248.520 316.028  1.00  0.00           H  
ATOM   3221  HB3 LYS X 200     225.806 247.464 314.691  1.00  0.00           H  
ATOM   3222  HG2 LYS X 200     226.423 249.516 313.412  1.00  0.00           H  
ATOM   3223  HG3 LYS X 200     226.128 250.546 314.818  1.00  0.00           H  
ATOM   3224  HD2 LYS X 200     227.712 249.107 316.043  1.00  0.00           H  
ATOM   3225  HD3 LYS X 200     228.200 248.377 314.522  1.00  0.00           H  
ATOM   3226  HE2 LYS X 200     229.833 250.009 314.988  1.00  0.00           H  
ATOM   3227  HE3 LYS X 200     228.986 250.636 313.736  1.00  0.00           H  
ATOM   3228  HZ1 LYS X 200     228.492 250.955 316.676  1.00  0.00           H  
ATOM   3229  HZ2 LYS X 200     227.637 251.812 315.670  1.00  0.00           H  
ATOM   3230  HZ3 LYS X 200     229.279 252.146 315.840  1.00  0.00           H  
ATOM   3231  N   LEU X 201     222.414 247.446 315.518  1.00  0.00           N  
ATOM   3232  CA  LEU X 201     221.582 246.270 315.799  1.00  0.00           C  
ATOM   3233  C   LEU X 201     220.262 246.335 314.965  1.00  0.00           C  
ATOM   3234  O   LEU X 201     219.830 245.373 314.341  1.00  0.00           O  
ATOM   3235  CB  LEU X 201     221.175 246.256 317.381  1.00  0.00           C  
ATOM   3236  CG  LEU X 201     220.345 245.046 317.811  1.00  0.00           C  
ATOM   3237  CD1 LEU X 201     221.056 243.665 317.700  1.00  0.00           C  
ATOM   3238  CD2 LEU X 201     220.051 245.202 319.320  1.00  0.00           C  
ATOM   3239  H   LEU X 201     222.450 248.129 316.261  1.00  0.00           H  
ATOM   3240  HA  LEU X 201     222.176 245.397 315.531  1.00  0.00           H  
ATOM   3241  HB2 LEU X 201     222.109 246.309 317.941  1.00  0.00           H  
ATOM   3242  HB3 LEU X 201     220.626 247.162 317.638  1.00  0.00           H  
ATOM   3243  HG  LEU X 201     219.391 244.949 317.293  1.00  0.00           H  
ATOM   3244 HD11 LEU X 201     220.391 242.849 317.982  1.00  0.00           H  
ATOM   3245 HD12 LEU X 201     221.847 243.421 318.409  1.00  0.00           H  
ATOM   3246 HD13 LEU X 201     221.419 243.542 316.680  1.00  0.00           H  
ATOM   3247 HD21 LEU X 201     220.938 245.347 319.936  1.00  0.00           H  
ATOM   3248 HD22 LEU X 201     219.378 246.046 319.466  1.00  0.00           H  
ATOM   3249 HD23 LEU X 201     219.554 244.310 319.703  1.00  0.00           H  
ATOM   3250  N   ASN X 202     219.717 247.585 314.833  1.00  0.00           N  
ATOM   3251  CA  ASN X 202     218.683 247.977 313.917  1.00  0.00           C  
ATOM   3252  C   ASN X 202     219.065 247.697 312.417  1.00  0.00           C  
ATOM   3253  O   ASN X 202     218.319 247.109 311.668  1.00  0.00           O  
ATOM   3254  CB  ASN X 202     218.202 249.356 314.177  1.00  0.00           C  
ATOM   3255  CG  ASN X 202     216.743 249.496 313.771  1.00  0.00           C  
ATOM   3256  ND2 ASN X 202     216.532 250.104 312.635  1.00  0.00           N  
ATOM   3257  OD1 ASN X 202     215.805 249.282 314.515  1.00  0.00           O  
ATOM   3258  H   ASN X 202     220.093 248.318 315.418  1.00  0.00           H  
ATOM   3259  HA  ASN X 202     217.840 247.323 314.138  1.00  0.00           H  
ATOM   3260  HB2 ASN X 202     218.235 249.463 315.261  1.00  0.00           H  
ATOM   3261  HB3 ASN X 202     218.930 250.063 313.780  1.00  0.00           H  
ATOM   3262 HD21 ASN X 202     217.322 250.295 312.036  1.00  0.00           H  
ATOM   3263 HD22 ASN X 202     215.573 250.319 312.400  1.00  0.00           H  
ATOM   3264  N   GLU X 203     220.244 248.136 312.027  1.00  0.00           N  
ATOM   3265  CA  GLU X 203     220.846 247.831 310.695  1.00  0.00           C  
ATOM   3266  C   GLU X 203     220.883 246.409 310.368  1.00  0.00           C  
ATOM   3267  O   GLU X 203     220.670 246.031 309.187  1.00  0.00           O  
ATOM   3268  CB  GLU X 203     222.188 248.573 310.632  1.00  0.00           C  
ATOM   3269  CG  GLU X 203     222.901 248.586 309.271  1.00  0.00           C  
ATOM   3270  CD  GLU X 203     223.983 249.636 309.222  1.00  0.00           C  
ATOM   3271  OE1 GLU X 203     223.884 250.522 308.338  1.00  0.00           O  
ATOM   3272  OE2 GLU X 203     225.023 249.488 309.891  1.00  0.00           O1-
ATOM   3273  H   GLU X 203     220.783 248.731 312.640  1.00  0.00           H  
ATOM   3274  HA  GLU X 203     220.184 248.276 309.953  1.00  0.00           H  
ATOM   3275  HB2 GLU X 203     222.127 249.617 310.939  1.00  0.00           H  
ATOM   3276  HB3 GLU X 203     222.867 248.227 311.412  1.00  0.00           H  
ATOM   3277  HG2 GLU X 203     223.310 247.583 309.145  1.00  0.00           H  
ATOM   3278  HG3 GLU X 203     222.156 248.907 308.544  1.00  0.00           H  
ATOM   3279  N   ASN X 204     221.277 245.516 311.285  1.00  0.00           N  
ATOM   3280  CA  ASN X 204     221.222 244.027 311.084  1.00  0.00           C  
ATOM   3281  C   ASN X 204     219.797 243.447 310.963  1.00  0.00           C  
ATOM   3282  O   ASN X 204     219.525 242.656 310.068  1.00  0.00           O  
ATOM   3283  CB  ASN X 204     221.920 243.430 312.237  1.00  0.00           C  
ATOM   3284  CG  ASN X 204     223.473 243.552 312.077  1.00  0.00           C  
ATOM   3285  ND2 ASN X 204     224.130 242.426 312.171  1.00  0.00           N  
ATOM   3286  OD1 ASN X 204     224.088 244.471 311.608  1.00  0.00           O  
ATOM   3287  H   ASN X 204     221.388 245.880 312.221  1.00  0.00           H  
ATOM   3288  HA  ASN X 204     221.777 243.833 310.166  1.00  0.00           H  
ATOM   3289  HB2 ASN X 204     221.709 243.921 313.187  1.00  0.00           H  
ATOM   3290  HB3 ASN X 204     221.614 242.385 312.287  1.00  0.00           H  
ATOM   3291 HD21 ASN X 204     223.653 241.550 312.332  1.00  0.00           H  
ATOM   3292 HD22 ASN X 204     225.090 242.534 311.875  1.00  0.00           H  
ATOM   3293  N   ILE X 205     218.849 244.041 311.694  1.00  0.00           N  
ATOM   3294  CA  ILE X 205     217.432 243.638 311.547  1.00  0.00           C  
ATOM   3295  C   ILE X 205     216.878 244.051 310.242  1.00  0.00           C  
ATOM   3296  O   ILE X 205     216.161 243.326 309.521  1.00  0.00           O  
ATOM   3297  CB  ILE X 205     216.632 244.202 312.712  1.00  0.00           C  
ATOM   3298  CG1 ILE X 205     216.863 243.576 314.141  1.00  0.00           C  
ATOM   3299  CG2 ILE X 205     215.172 244.219 312.383  1.00  0.00           C  
ATOM   3300  CD1 ILE X 205     216.680 244.561 315.238  1.00  0.00           C  
ATOM   3301  H   ILE X 205     219.119 244.704 312.407  1.00  0.00           H  
ATOM   3302  HA  ILE X 205     217.426 242.548 311.524  1.00  0.00           H  
ATOM   3303  HB  ILE X 205     216.960 245.240 312.772  1.00  0.00           H  
ATOM   3304 HG12 ILE X 205     216.294 242.654 314.267  1.00  0.00           H  
ATOM   3305 HG13 ILE X 205     217.889 243.222 314.244  1.00  0.00           H  
ATOM   3306 HG21 ILE X 205     214.908 244.728 311.457  1.00  0.00           H  
ATOM   3307 HG22 ILE X 205     214.684 244.653 313.256  1.00  0.00           H  
ATOM   3308 HG23 ILE X 205     214.822 243.193 312.271  1.00  0.00           H  
ATOM   3309 HD11 ILE X 205     217.241 245.489 315.125  1.00  0.00           H  
ATOM   3310 HD12 ILE X 205     216.992 244.049 316.149  1.00  0.00           H  
ATOM   3311 HD13 ILE X 205     215.614 244.757 315.356  1.00  0.00           H  
ATOM   3312  N   LYS X 206     217.273 245.210 309.842  1.00  0.00           N  
ATOM   3313  CA  LYS X 206     217.003 245.789 308.439  1.00  0.00           C  
ATOM   3314  C   LYS X 206     217.587 244.909 307.285  1.00  0.00           C  
ATOM   3315  O   LYS X 206     216.852 244.528 306.379  1.00  0.00           O  
ATOM   3316  CB  LYS X 206     217.543 247.221 308.430  1.00  0.00           C  
ATOM   3317  CG  LYS X 206     217.219 248.193 307.345  1.00  0.00           C  
ATOM   3318  CD  LYS X 206     215.805 248.737 307.399  1.00  0.00           C  
ATOM   3319  CE  LYS X 206     215.669 249.581 308.686  1.00  0.00           C  
ATOM   3320  NZ  LYS X 206     214.351 250.223 308.778  1.00  0.00           N1+
ATOM   3321  H   LYS X 206     217.686 245.741 310.595  1.00  0.00           H  
ATOM   3322  HA  LYS X 206     215.929 245.786 308.253  1.00  0.00           H  
ATOM   3323  HB2 LYS X 206     217.206 247.625 309.385  1.00  0.00           H  
ATOM   3324  HB3 LYS X 206     218.632 247.232 308.476  1.00  0.00           H  
ATOM   3325  HG2 LYS X 206     217.867 249.069 307.313  1.00  0.00           H  
ATOM   3326  HG3 LYS X 206     217.285 247.812 306.326  1.00  0.00           H  
ATOM   3327  HD2 LYS X 206     215.716 249.487 306.612  1.00  0.00           H  
ATOM   3328  HD3 LYS X 206     215.031 247.971 307.380  1.00  0.00           H  
ATOM   3329  HE2 LYS X 206     215.772 248.882 309.516  1.00  0.00           H  
ATOM   3330  HE3 LYS X 206     216.377 250.409 308.704  1.00  0.00           H  
ATOM   3331  HZ1 LYS X 206     213.612 249.605 308.473  1.00  0.00           H  
ATOM   3332  HZ2 LYS X 206     214.149 251.054 308.241  1.00  0.00           H  
ATOM   3333  HZ3 LYS X 206     214.047 250.419 309.721  1.00  0.00           H  
ATOM   3334  N   ILE X 207     218.845 244.502 307.324  1.00  0.00           N  
ATOM   3335  CA  ILE X 207     219.472 243.619 306.297  1.00  0.00           C  
ATOM   3336  C   ILE X 207     218.961 242.144 306.269  1.00  0.00           C  
ATOM   3337  O   ILE X 207     218.700 241.615 305.154  1.00  0.00           O  
ATOM   3338  CB  ILE X 207     221.038 243.735 306.174  1.00  0.00           C  
ATOM   3339  CG1 ILE X 207     221.462 245.166 305.707  1.00  0.00           C  
ATOM   3340  CG2 ILE X 207     221.698 242.606 305.258  1.00  0.00           C  
ATOM   3341  CD1 ILE X 207     222.865 245.630 306.296  1.00  0.00           C  
ATOM   3342  H   ILE X 207     219.406 244.712 308.137  1.00  0.00           H  
ATOM   3343  HA  ILE X 207     219.086 244.099 305.398  1.00  0.00           H  
ATOM   3344  HB  ILE X 207     221.501 243.631 307.156  1.00  0.00           H  
ATOM   3345 HG12 ILE X 207     221.535 245.111 304.621  1.00  0.00           H  
ATOM   3346 HG13 ILE X 207     220.684 245.883 305.967  1.00  0.00           H  
ATOM   3347 HG21 ILE X 207     221.363 242.613 304.221  1.00  0.00           H  
ATOM   3348 HG22 ILE X 207     221.390 241.636 305.650  1.00  0.00           H  
ATOM   3349 HG23 ILE X 207     222.786 242.669 305.295  1.00  0.00           H  
ATOM   3350 HD11 ILE X 207     223.552 244.915 305.844  1.00  0.00           H  
ATOM   3351 HD12 ILE X 207     222.842 245.585 307.385  1.00  0.00           H  
ATOM   3352 HD13 ILE X 207     223.106 246.667 306.063  1.00  0.00           H  
ATOM   3353  N   LEU X 208     218.717 241.569 307.511  1.00  0.00           N  
ATOM   3354  CA  LEU X 208     217.918 240.389 307.642  1.00  0.00           C  
ATOM   3355  C   LEU X 208     216.505 240.548 307.129  1.00  0.00           C  
ATOM   3356  O   LEU X 208     215.927 239.523 306.778  1.00  0.00           O  
ATOM   3357  CB  LEU X 208     217.930 239.830 309.065  1.00  0.00           C  
ATOM   3358  CG  LEU X 208     219.375 239.437 309.570  1.00  0.00           C  
ATOM   3359  CD1 LEU X 208     219.283 239.160 311.040  1.00  0.00           C  
ATOM   3360  CD2 LEU X 208     219.760 238.182 308.813  1.00  0.00           C  
ATOM   3361  H   LEU X 208     218.823 242.116 308.353  1.00  0.00           H  
ATOM   3362  HA  LEU X 208     218.223 239.643 306.908  1.00  0.00           H  
ATOM   3363  HB2 LEU X 208     217.491 240.635 309.655  1.00  0.00           H  
ATOM   3364  HB3 LEU X 208     217.276 238.987 309.288  1.00  0.00           H  
ATOM   3365  HG  LEU X 208     220.018 240.283 309.326  1.00  0.00           H  
ATOM   3366 HD11 LEU X 208     218.680 238.285 311.285  1.00  0.00           H  
ATOM   3367 HD12 LEU X 208     218.762 239.955 311.574  1.00  0.00           H  
ATOM   3368 HD13 LEU X 208     220.276 239.258 311.478  1.00  0.00           H  
ATOM   3369 HD21 LEU X 208     219.964 238.491 307.788  1.00  0.00           H  
ATOM   3370 HD22 LEU X 208     220.694 237.721 309.135  1.00  0.00           H  
ATOM   3371 HD23 LEU X 208     218.919 237.497 308.923  1.00  0.00           H  
ATOM   3372  N   SER X 209     215.897 241.706 307.041  1.00  0.00           N  
ATOM   3373  CA  SER X 209     214.607 241.885 306.365  1.00  0.00           C  
ATOM   3374  C   SER X 209     214.402 241.855 304.855  1.00  0.00           C  
ATOM   3375  O   SER X 209     213.373 242.237 304.340  1.00  0.00           O  
ATOM   3376  CB  SER X 209     213.986 243.137 307.012  1.00  0.00           C  
ATOM   3377  OG  SER X 209     213.864 243.009 308.403  1.00  0.00           O  
ATOM   3378  H   SER X 209     216.401 242.517 307.371  1.00  0.00           H  
ATOM   3379  HA  SER X 209     214.026 241.038 306.730  1.00  0.00           H  
ATOM   3380  HB2 SER X 209     214.685 243.965 306.892  1.00  0.00           H  
ATOM   3381  HB3 SER X 209     213.021 243.330 306.542  1.00  0.00           H  
ATOM   3382  HG  SER X 209     214.724 243.130 308.812  1.00  0.00           H  
ATOM   3383  N   SER X 210     215.547 241.654 304.098  1.00  0.00           N  
ATOM   3384  CA  SER X 210     215.729 242.030 302.685  1.00  0.00           C  
ATOM   3385  C   SER X 210     215.264 240.938 301.764  1.00  0.00           C  
ATOM   3386  O   SER X 210     215.645 239.772 301.956  1.00  0.00           O  
ATOM   3387  CB  SER X 210     217.237 242.185 302.487  1.00  0.00           C  
ATOM   3388  OG  SER X 210     217.642 242.596 301.169  1.00  0.00           O  
ATOM   3389  H   SER X 210     216.364 241.324 304.592  1.00  0.00           H  
ATOM   3390  HA  SER X 210     215.247 242.975 302.431  1.00  0.00           H  
ATOM   3391  HB2 SER X 210     217.572 243.040 303.074  1.00  0.00           H  
ATOM   3392  HB3 SER X 210     217.761 241.268 302.755  1.00  0.00           H  
ATOM   3393  HG  SER X 210     218.577 242.802 301.240  1.00  0.00           H  
ATOM   3394  N   PRO X 211     214.645 241.326 300.662  1.00  0.00           N  
ATOM   3395  CA  PRO X 211     214.367 240.371 299.592  1.00  0.00           C  
ATOM   3396  C   PRO X 211     215.614 239.833 298.852  1.00  0.00           C  
ATOM   3397  O   PRO X 211     215.685 238.708 298.418  1.00  0.00           O  
ATOM   3398  CB  PRO X 211     213.278 241.079 298.700  1.00  0.00           C  
ATOM   3399  CG  PRO X 211     213.699 242.506 298.814  1.00  0.00           C  
ATOM   3400  CD  PRO X 211     214.279 242.643 300.262  1.00  0.00           C  
ATOM   3401  HA  PRO X 211     213.964 239.476 300.066  1.00  0.00           H  
ATOM   3402  HB2 PRO X 211     213.271 240.647 297.699  1.00  0.00           H  
ATOM   3403  HB3 PRO X 211     212.329 240.816 299.167  1.00  0.00           H  
ATOM   3404  HG2 PRO X 211     214.506 242.561 298.083  1.00  0.00           H  
ATOM   3405  HG3 PRO X 211     212.930 243.256 298.631  1.00  0.00           H  
ATOM   3406  HD2 PRO X 211     215.133 243.318 300.204  1.00  0.00           H  
ATOM   3407  HD3 PRO X 211     213.450 243.007 300.868  1.00  0.00           H  
ATOM   3408  N   TRP X 212     216.680 240.602 298.877  1.00  0.00           N  
ATOM   3409  CA  TRP X 212     217.992 240.045 298.636  1.00  0.00           C  
ATOM   3410  C   TRP X 212     218.455 238.841 299.516  1.00  0.00           C  
ATOM   3411  O   TRP X 212     218.913 237.863 298.986  1.00  0.00           O  
ATOM   3412  CB  TRP X 212     219.086 241.094 298.606  1.00  0.00           C  
ATOM   3413  CG  TRP X 212     219.120 242.294 297.709  1.00  0.00           C  
ATOM   3414  CD1 TRP X 212     218.362 243.307 297.860  1.00  0.00           C  
ATOM   3415  CD2 TRP X 212     219.923 242.533 296.498  1.00  0.00           C  
ATOM   3416  CE2 TRP X 212     219.461 243.787 295.891  1.00  0.00           C  
ATOM   3417  CE3 TRP X 212     220.990 241.841 295.906  1.00  0.00           C  
ATOM   3418  NE1 TRP X 212     218.564 244.239 296.813  1.00  0.00           N  
ATOM   3419  CZ2 TRP X 212     220.002 244.246 294.764  1.00  0.00           C  
ATOM   3420  CZ3 TRP X 212     221.639 242.473 294.796  1.00  0.00           C  
ATOM   3421  CH2 TRP X 212     221.111 243.562 294.189  1.00  0.00           C  
ATOM   3422  H   TRP X 212     216.611 241.511 299.312  1.00  0.00           H  
ATOM   3423  HA  TRP X 212     217.953 239.665 297.615  1.00  0.00           H  
ATOM   3424  HB2 TRP X 212     219.270 241.546 299.581  1.00  0.00           H  
ATOM   3425  HB3 TRP X 212     219.921 240.451 298.327  1.00  0.00           H  
ATOM   3426  HD1 TRP X 212     217.646 243.471 298.652  1.00  0.00           H  
ATOM   3427  HE1 TRP X 212     218.104 245.132 296.714  1.00  0.00           H  
ATOM   3428  HE3 TRP X 212     221.336 240.916 296.344  1.00  0.00           H  
ATOM   3429  HZ2 TRP X 212     219.700 245.185 294.326  1.00  0.00           H  
ATOM   3430  HZ3 TRP X 212     222.577 242.094 294.419  1.00  0.00           H  
ATOM   3431  HH2 TRP X 212     221.565 243.963 293.295  1.00  0.00           H  
ATOM   3432  N   ILE X 213     218.405 239.013 300.874  1.00  0.00           N  
ATOM   3433  CA  ILE X 213     218.715 237.826 301.729  1.00  0.00           C  
ATOM   3434  C   ILE X 213     217.730 236.680 301.471  1.00  0.00           C  
ATOM   3435  O   ILE X 213     218.107 235.500 301.536  1.00  0.00           O  
ATOM   3436  CB  ILE X 213     218.852 238.339 303.182  1.00  0.00           C  
ATOM   3437  CG1 ILE X 213     220.195 239.097 303.409  1.00  0.00           C  
ATOM   3438  CG2 ILE X 213     218.689 237.196 304.145  1.00  0.00           C  
ATOM   3439  CD1 ILE X 213     221.508 238.423 302.984  1.00  0.00           C  
ATOM   3440  H   ILE X 213     218.183 239.916 301.270  1.00  0.00           H  
ATOM   3441  HA  ILE X 213     219.706 237.421 301.523  1.00  0.00           H  
ATOM   3442  HB  ILE X 213     218.065 239.065 303.389  1.00  0.00           H  
ATOM   3443 HG12 ILE X 213     220.066 240.023 302.850  1.00  0.00           H  
ATOM   3444 HG13 ILE X 213     220.296 239.474 304.427  1.00  0.00           H  
ATOM   3445 HG21 ILE X 213     218.891 237.531 305.162  1.00  0.00           H  
ATOM   3446 HG22 ILE X 213     219.504 236.472 304.127  1.00  0.00           H  
ATOM   3447 HG23 ILE X 213     217.744 236.652 304.134  1.00  0.00           H  
ATOM   3448 HD11 ILE X 213     222.369 238.926 303.424  1.00  0.00           H  
ATOM   3449 HD12 ILE X 213     221.720 238.431 301.914  1.00  0.00           H  
ATOM   3450 HD13 ILE X 213     221.590 237.431 303.428  1.00  0.00           H  
ATOM   3451  N   GLN X 214     216.507 237.012 301.253  1.00  0.00           N  
ATOM   3452  CA  GLN X 214     215.554 235.973 300.931  1.00  0.00           C  
ATOM   3453  C   GLN X 214     215.723 235.284 299.547  1.00  0.00           C  
ATOM   3454  O   GLN X 214     215.380 234.124 299.558  1.00  0.00           O  
ATOM   3455  CB  GLN X 214     214.109 236.314 301.193  1.00  0.00           C  
ATOM   3456  CG  GLN X 214     213.695 237.034 302.576  1.00  0.00           C  
ATOM   3457  CD  GLN X 214     213.857 236.137 303.796  1.00  0.00           C  
ATOM   3458  NE2 GLN X 214     213.293 234.945 303.764  1.00  0.00           N  
ATOM   3459  OE1 GLN X 214     214.391 236.488 304.838  1.00  0.00           O  
ATOM   3460  H   GLN X 214     216.164 237.960 301.319  1.00  0.00           H  
ATOM   3461  HA  GLN X 214     215.725 235.100 301.560  1.00  0.00           H  
ATOM   3462  HB2 GLN X 214     213.870 237.037 300.412  1.00  0.00           H  
ATOM   3463  HB3 GLN X 214     213.591 235.389 300.942  1.00  0.00           H  
ATOM   3464  HG2 GLN X 214     214.276 237.942 302.737  1.00  0.00           H  
ATOM   3465  HG3 GLN X 214     212.676 237.418 302.531  1.00  0.00           H  
ATOM   3466 HE21 GLN X 214     213.326 234.360 304.586  1.00  0.00           H  
ATOM   3467 HE22 GLN X 214     212.745 234.597 302.990  1.00  0.00           H  
ATOM   3468  N   ILE X 215     216.304 235.899 298.451  1.00  0.00           N  
ATOM   3469  CA  ILE X 215     216.910 235.015 297.359  1.00  0.00           C  
ATOM   3470  C   ILE X 215     218.310 234.498 297.711  1.00  0.00           C  
ATOM   3471  O   ILE X 215     218.636 233.408 297.100  1.00  0.00           O  
ATOM   3472  CB  ILE X 215     216.742 235.768 296.009  1.00  0.00           C  
ATOM   3473  CG1 ILE X 215     216.859 234.901 294.773  1.00  0.00           C  
ATOM   3474  CG2 ILE X 215     217.865 236.875 295.869  1.00  0.00           C  
ATOM   3475  CD1 ILE X 215     215.449 234.125 294.617  1.00  0.00           C  
ATOM   3476  H   ILE X 215     216.400 236.903 298.517  1.00  0.00           H  
ATOM   3477  HA  ILE X 215     216.276 234.131 297.286  1.00  0.00           H  
ATOM   3478  HB  ILE X 215     215.743 236.203 296.044  1.00  0.00           H  
ATOM   3479 HG12 ILE X 215     216.967 235.651 293.990  1.00  0.00           H  
ATOM   3480 HG13 ILE X 215     217.779 234.316 294.771  1.00  0.00           H  
ATOM   3481 HG21 ILE X 215     218.901 236.602 295.672  1.00  0.00           H  
ATOM   3482 HG22 ILE X 215     217.840 237.456 296.791  1.00  0.00           H  
ATOM   3483 HG23 ILE X 215     217.486 237.586 295.136  1.00  0.00           H  
ATOM   3484 HD11 ILE X 215     214.565 234.761 294.661  1.00  0.00           H  
ATOM   3485 HD12 ILE X 215     215.485 233.441 295.464  1.00  0.00           H  
ATOM   3486 HD13 ILE X 215     215.501 233.577 293.676  1.00  0.00           H  
ATOM   3487  N   CYS X 216     219.131 235.110 298.561  1.00  0.00           N  
ATOM   3488  CA  CYS X 216     220.358 234.499 298.980  1.00  0.00           C  
ATOM   3489  C   CYS X 216     220.206 233.184 299.802  1.00  0.00           C  
ATOM   3490  O   CYS X 216     221.047 232.306 299.713  1.00  0.00           O  
ATOM   3491  CB  CYS X 216     221.177 235.570 299.713  1.00  0.00           C  
ATOM   3492  SG  CYS X 216     221.819 236.560 298.380  1.00  0.00           S  
ATOM   3493  H   CYS X 216     218.746 235.825 299.161  1.00  0.00           H  
ATOM   3494  HA  CYS X 216     220.943 234.196 298.111  1.00  0.00           H  
ATOM   3495  HB2 CYS X 216     220.609 236.024 300.525  1.00  0.00           H  
ATOM   3496  HB3 CYS X 216     222.026 235.103 300.212  1.00  0.00           H  
ATOM   3497  HG  CYS X 216     220.881 237.505 298.267  1.00  0.00           H  
ATOM   3498  N   ASN X 217     219.053 232.995 300.370  1.00  0.00           N  
ATOM   3499  CA  ASN X 217     218.749 231.841 301.114  1.00  0.00           C  
ATOM   3500  C   ASN X 217     218.594 230.616 300.175  1.00  0.00           C  
ATOM   3501  O   ASN X 217     218.630 229.506 300.591  1.00  0.00           O  
ATOM   3502  CB  ASN X 217     217.529 232.202 302.062  1.00  0.00           C  
ATOM   3503  CG  ASN X 217     217.014 230.902 302.681  1.00  0.00           C  
ATOM   3504  ND2 ASN X 217     216.089 230.192 302.107  1.00  0.00           N  
ATOM   3505  OD1 ASN X 217     217.551 230.480 303.742  1.00  0.00           O  
ATOM   3506  H   ASN X 217     218.460 233.803 300.494  1.00  0.00           H  
ATOM   3507  HA  ASN X 217     219.561 231.561 301.785  1.00  0.00           H  
ATOM   3508  HB2 ASN X 217     217.659 233.008 302.784  1.00  0.00           H  
ATOM   3509  HB3 ASN X 217     216.726 232.685 301.506  1.00  0.00           H  
ATOM   3510 HD21 ASN X 217     215.476 230.569 301.399  1.00  0.00           H  
ATOM   3511 HD22 ASN X 217     215.991 229.221 302.369  1.00  0.00           H  
ATOM   3512  N   ASN X 218     218.424 230.847 298.834  1.00  0.00           N  
ATOM   3513  CA  ASN X 218     218.550 229.828 297.766  1.00  0.00           C  
ATOM   3514  C   ASN X 218     220.001 229.643 297.285  1.00  0.00           C  
ATOM   3515  O   ASN X 218     220.425 228.532 296.955  1.00  0.00           O  
ATOM   3516  CB  ASN X 218     217.535 230.134 296.695  1.00  0.00           C  
ATOM   3517  CG  ASN X 218     216.105 229.579 297.005  1.00  0.00           C  
ATOM   3518  ND2 ASN X 218     215.739 228.473 296.476  1.00  0.00           N  
ATOM   3519  OD1 ASN X 218     215.370 230.103 297.821  1.00  0.00           O  
ATOM   3520  H   ASN X 218     218.053 231.772 298.671  1.00  0.00           H  
ATOM   3521  HA  ASN X 218     218.295 228.815 298.077  1.00  0.00           H  
ATOM   3522  HB2 ASN X 218     217.426 231.204 296.516  1.00  0.00           H  
ATOM   3523  HB3 ASN X 218     217.808 229.767 295.706  1.00  0.00           H  
ATOM   3524 HD21 ASN X 218     216.365 228.065 295.795  1.00  0.00           H  
ATOM   3525 HD22 ASN X 218     214.818 228.101 296.659  1.00  0.00           H  
ATOM   3526  N   PHE X 219     220.795 230.707 297.210  1.00  0.00           N  
ATOM   3527  CA  PHE X 219     221.942 230.880 296.302  1.00  0.00           C  
ATOM   3528  C   PHE X 219     222.740 232.078 296.842  1.00  0.00           C  
ATOM   3529  O   PHE X 219     222.841 233.195 296.298  1.00  0.00           O  
ATOM   3530  CB  PHE X 219     221.384 231.026 294.900  1.00  0.00           C  
ATOM   3531  CG  PHE X 219     222.550 231.227 293.923  1.00  0.00           C  
ATOM   3532  CD1 PHE X 219     222.846 232.413 293.177  1.00  0.00           C  
ATOM   3533  CD2 PHE X 219     223.421 230.131 293.748  1.00  0.00           C  
ATOM   3534  CE1 PHE X 219     223.882 232.427 292.199  1.00  0.00           C  
ATOM   3535  CE2 PHE X 219     224.435 230.146 292.684  1.00  0.00           C  
ATOM   3536  CZ  PHE X 219     224.630 231.340 291.947  1.00  0.00           C  
ATOM   3537  H   PHE X 219     220.322 231.537 297.536  1.00  0.00           H  
ATOM   3538  HA  PHE X 219     222.526 229.971 296.447  1.00  0.00           H  
ATOM   3539  HB2 PHE X 219     220.998 230.032 294.674  1.00  0.00           H  
ATOM   3540  HB3 PHE X 219     220.653 231.816 294.729  1.00  0.00           H  
ATOM   3541  HD1 PHE X 219     222.344 233.326 293.462  1.00  0.00           H  
ATOM   3542  HD2 PHE X 219     223.214 229.226 294.299  1.00  0.00           H  
ATOM   3543  HE1 PHE X 219     224.039 233.322 291.615  1.00  0.00           H  
ATOM   3544  HE2 PHE X 219     225.224 229.410 292.650  1.00  0.00           H  
ATOM   3545  HZ  PHE X 219     225.523 231.364 291.340  1.00  0.00           H  
ATOM   3546  N   SER X 220     223.670 231.857 297.849  1.00  0.00           N  
ATOM   3547  CA  SER X 220     224.557 232.869 298.441  1.00  0.00           C  
ATOM   3548  C   SER X 220     225.677 233.509 297.671  1.00  0.00           C  
ATOM   3549  O   SER X 220     226.109 234.645 298.055  1.00  0.00           O  
ATOM   3550  CB  SER X 220     225.107 232.161 299.755  1.00  0.00           C  
ATOM   3551  OG  SER X 220     225.460 230.831 299.523  1.00  0.00           O  
ATOM   3552  H   SER X 220     223.832 230.935 298.229  1.00  0.00           H  
ATOM   3553  HA  SER X 220     223.900 233.715 298.640  1.00  0.00           H  
ATOM   3554  HB2 SER X 220     225.964 232.708 300.149  1.00  0.00           H  
ATOM   3555  HB3 SER X 220     224.323 232.287 300.501  1.00  0.00           H  
ATOM   3556  HG  SER X 220     226.401 230.812 299.335  1.00  0.00           H  
ATOM   3557  N   PRO X 221     226.192 233.026 296.518  1.00  0.00           N  
ATOM   3558  CA  PRO X 221     227.122 233.696 295.544  1.00  0.00           C  
ATOM   3559  C   PRO X 221     226.763 235.186 295.118  1.00  0.00           C  
ATOM   3560  O   PRO X 221     227.679 235.877 294.638  1.00  0.00           O  
ATOM   3561  CB  PRO X 221     227.175 232.739 294.349  1.00  0.00           C  
ATOM   3562  CG  PRO X 221     227.139 231.474 295.080  1.00  0.00           C  
ATOM   3563  CD  PRO X 221     225.992 231.699 296.036  1.00  0.00           C  
ATOM   3564  HA  PRO X 221     228.103 233.706 296.020  1.00  0.00           H  
ATOM   3565  HB2 PRO X 221     226.321 232.871 293.684  1.00  0.00           H  
ATOM   3566  HB3 PRO X 221     228.119 232.795 293.807  1.00  0.00           H  
ATOM   3567  HG2 PRO X 221     227.009 230.667 294.359  1.00  0.00           H  
ATOM   3568  HG3 PRO X 221     228.088 231.299 295.588  1.00  0.00           H  
ATOM   3569  HD2 PRO X 221     225.132 231.760 295.369  1.00  0.00           H  
ATOM   3570  HD3 PRO X 221     225.994 230.903 296.780  1.00  0.00           H  
ATOM   3571  N   ILE X 222     225.515 235.636 295.322  1.00  0.00           N  
ATOM   3572  CA  ILE X 222     225.112 237.059 295.092  1.00  0.00           C  
ATOM   3573  C   ILE X 222     225.876 238.008 295.960  1.00  0.00           C  
ATOM   3574  O   ILE X 222     226.382 239.073 295.578  1.00  0.00           O  
ATOM   3575  CB  ILE X 222     223.576 237.187 295.239  1.00  0.00           C  
ATOM   3576  CG1 ILE X 222     222.842 236.580 294.042  1.00  0.00           C  
ATOM   3577  CG2 ILE X 222     223.080 238.590 295.611  1.00  0.00           C  
ATOM   3578  CD1 ILE X 222     221.444 235.996 294.232  1.00  0.00           C  
ATOM   3579  H   ILE X 222     224.863 234.958 295.689  1.00  0.00           H  
ATOM   3580  HA  ILE X 222     225.414 237.383 294.096  1.00  0.00           H  
ATOM   3581  HB  ILE X 222     223.343 236.536 296.082  1.00  0.00           H  
ATOM   3582 HG12 ILE X 222     222.797 237.318 293.241  1.00  0.00           H  
ATOM   3583 HG13 ILE X 222     223.359 235.666 293.751  1.00  0.00           H  
ATOM   3584 HG21 ILE X 222     223.497 239.263 294.861  1.00  0.00           H  
ATOM   3585 HG22 ILE X 222     223.501 238.842 296.584  1.00  0.00           H  
ATOM   3586 HG23 ILE X 222     221.996 238.528 295.510  1.00  0.00           H  
ATOM   3587 HD11 ILE X 222     221.127 235.466 293.334  1.00  0.00           H  
ATOM   3588 HD12 ILE X 222     220.775 236.856 294.225  1.00  0.00           H  
ATOM   3589 HD13 ILE X 222     221.406 235.441 295.169  1.00  0.00           H  
ATOM   3590  N   ILE X 223     226.121 237.599 297.187  1.00  0.00           N  
ATOM   3591  CA  ILE X 223     226.902 238.427 298.156  1.00  0.00           C  
ATOM   3592  C   ILE X 223     228.374 238.649 297.871  1.00  0.00           C  
ATOM   3593  O   ILE X 223     229.013 239.582 298.347  1.00  0.00           O  
ATOM   3594  CB  ILE X 223     226.607 237.911 299.594  1.00  0.00           C  
ATOM   3595  CG1 ILE X 223     225.084 237.930 299.754  1.00  0.00           C  
ATOM   3596  CG2 ILE X 223     227.466 238.668 300.676  1.00  0.00           C  
ATOM   3597  CD1 ILE X 223     224.618 237.080 300.905  1.00  0.00           C  
ATOM   3598  H   ILE X 223     225.589 236.806 297.513  1.00  0.00           H  
ATOM   3599  HA  ILE X 223     226.523 239.446 298.076  1.00  0.00           H  
ATOM   3600  HB  ILE X 223     226.945 236.875 299.555  1.00  0.00           H  
ATOM   3601 HG12 ILE X 223     224.775 238.919 300.091  1.00  0.00           H  
ATOM   3602 HG13 ILE X 223     224.398 237.741 298.929  1.00  0.00           H  
ATOM   3603 HG21 ILE X 223     227.405 239.744 300.514  1.00  0.00           H  
ATOM   3604 HG22 ILE X 223     228.521 238.402 300.614  1.00  0.00           H  
ATOM   3605 HG23 ILE X 223     227.249 238.504 301.732  1.00  0.00           H  
ATOM   3606 HD11 ILE X 223     225.226 237.289 301.785  1.00  0.00           H  
ATOM   3607 HD12 ILE X 223     224.754 236.046 300.589  1.00  0.00           H  
ATOM   3608 HD13 ILE X 223     223.569 237.313 301.089  1.00  0.00           H  
ATOM   3609  N   ASP X 224     228.963 237.809 297.057  1.00  0.00           N  
ATOM   3610  CA  ASP X 224     230.333 237.864 296.528  1.00  0.00           C  
ATOM   3611  C   ASP X 224     230.372 238.927 295.412  1.00  0.00           C  
ATOM   3612  O   ASP X 224     231.370 239.642 295.413  1.00  0.00           O  
ATOM   3613  CB  ASP X 224     230.811 236.500 295.962  1.00  0.00           C  
ATOM   3614  CG  ASP X 224     231.034 235.601 297.136  1.00  0.00           C  
ATOM   3615  OD1 ASP X 224     230.807 234.318 297.017  1.00  0.00           O  
ATOM   3616  OD2 ASP X 224     231.548 236.053 298.170  1.00  0.00           O1-
ATOM   3617  H   ASP X 224     228.330 237.145 296.634  1.00  0.00           H  
ATOM   3618  HA  ASP X 224     230.958 238.176 297.365  1.00  0.00           H  
ATOM   3619  HB2 ASP X 224     229.979 236.020 295.446  1.00  0.00           H  
ATOM   3620  HB3 ASP X 224     231.697 236.588 295.333  1.00  0.00           H  
ATOM   3621  N   TYR X 225     229.437 239.085 294.500  1.00  0.00           N  
ATOM   3622  CA  TYR X 225     229.561 240.058 293.382  1.00  0.00           C  
ATOM   3623  C   TYR X 225     228.955 241.424 293.815  1.00  0.00           C  
ATOM   3624  O   TYR X 225     229.418 242.496 293.359  1.00  0.00           O  
ATOM   3625  CB  TYR X 225     228.983 239.451 292.059  1.00  0.00           C  
ATOM   3626  CG  TYR X 225     229.278 240.176 290.732  1.00  0.00           C  
ATOM   3627  CD1 TYR X 225     230.212 239.674 289.818  1.00  0.00           C  
ATOM   3628  CD2 TYR X 225     228.674 241.367 290.482  1.00  0.00           C  
ATOM   3629  CE1 TYR X 225     230.542 240.398 288.625  1.00  0.00           C  
ATOM   3630  CE2 TYR X 225     228.847 242.000 289.240  1.00  0.00           C  
ATOM   3631  CZ  TYR X 225     229.816 241.567 288.352  1.00  0.00           C  
ATOM   3632  OH  TYR X 225     230.031 242.186 287.154  1.00  0.00           O  
ATOM   3633  H   TYR X 225     228.653 238.449 294.512  1.00  0.00           H  
ATOM   3634  HA  TYR X 225     230.641 240.130 293.247  1.00  0.00           H  
ATOM   3635  HB2 TYR X 225     229.253 238.414 291.857  1.00  0.00           H  
ATOM   3636  HB3 TYR X 225     227.904 239.443 292.211  1.00  0.00           H  
ATOM   3637  HD1 TYR X 225     230.711 238.720 289.895  1.00  0.00           H  
ATOM   3638  HD2 TYR X 225     227.958 241.689 291.223  1.00  0.00           H  
ATOM   3639  HE1 TYR X 225     231.273 240.046 287.912  1.00  0.00           H  
ATOM   3640  HE2 TYR X 225     228.173 242.807 288.995  1.00  0.00           H  
ATOM   3641  HH  TYR X 225     230.943 242.004 286.917  1.00  0.00           H  
ATOM   3642  N   PHE X 226     228.016 241.381 294.806  1.00  0.00           N  
ATOM   3643  CA  PHE X 226     227.451 242.584 295.477  1.00  0.00           C  
ATOM   3644  C   PHE X 226     227.671 242.576 296.988  1.00  0.00           C  
ATOM   3645  O   PHE X 226     226.760 242.401 297.785  1.00  0.00           O  
ATOM   3646  CB  PHE X 226     225.935 242.628 295.126  1.00  0.00           C  
ATOM   3647  CG  PHE X 226     225.528 243.079 293.738  1.00  0.00           C  
ATOM   3648  CD1 PHE X 226     225.144 242.170 292.745  1.00  0.00           C  
ATOM   3649  CD2 PHE X 226     225.422 244.479 293.468  1.00  0.00           C  
ATOM   3650  CE1 PHE X 226     224.655 242.628 291.461  1.00  0.00           C  
ATOM   3651  CE2 PHE X 226     225.040 244.860 292.195  1.00  0.00           C  
ATOM   3652  CZ  PHE X 226     224.742 243.986 291.205  1.00  0.00           C  
ATOM   3653  H   PHE X 226     227.656 240.512 295.174  1.00  0.00           H  
ATOM   3654  HA  PHE X 226     227.983 243.462 295.112  1.00  0.00           H  
ATOM   3655  HB2 PHE X 226     225.447 241.687 295.381  1.00  0.00           H  
ATOM   3656  HB3 PHE X 226     225.384 243.325 295.758  1.00  0.00           H  
ATOM   3657  HD1 PHE X 226     225.133 241.108 292.941  1.00  0.00           H  
ATOM   3658  HD2 PHE X 226     225.715 245.215 294.203  1.00  0.00           H  
ATOM   3659  HE1 PHE X 226     224.460 242.011 290.596  1.00  0.00           H  
ATOM   3660  HE2 PHE X 226     225.080 245.925 292.019  1.00  0.00           H  
ATOM   3661  HZ  PHE X 226     224.506 244.335 290.210  1.00  0.00           H  
ATOM   3662  N   PRO X 227     228.914 242.840 297.482  1.00  0.00           N  
ATOM   3663  CA  PRO X 227     229.150 242.836 298.905  1.00  0.00           C  
ATOM   3664  C   PRO X 227     228.691 244.081 299.626  1.00  0.00           C  
ATOM   3665  O   PRO X 227     228.415 244.087 300.869  1.00  0.00           O  
ATOM   3666  CB  PRO X 227     230.709 242.818 299.023  1.00  0.00           C  
ATOM   3667  CG  PRO X 227     231.353 243.371 297.721  1.00  0.00           C  
ATOM   3668  CD  PRO X 227     230.258 242.879 296.765  1.00  0.00           C  
ATOM   3669  HA  PRO X 227     228.779 241.942 299.406  1.00  0.00           H  
ATOM   3670  HB2 PRO X 227     230.955 243.358 299.937  1.00  0.00           H  
ATOM   3671  HB3 PRO X 227     230.961 241.770 299.187  1.00  0.00           H  
ATOM   3672  HG2 PRO X 227     231.358 244.461 297.700  1.00  0.00           H  
ATOM   3673  HG3 PRO X 227     232.375 243.035 297.548  1.00  0.00           H  
ATOM   3674  HD2 PRO X 227     230.252 243.607 295.953  1.00  0.00           H  
ATOM   3675  HD3 PRO X 227     230.493 241.921 296.302  1.00  0.00           H  
ATOM   3676  N   GLY X 228     228.505 245.257 298.997  1.00  0.00           N  
ATOM   3677  CA  GLY X 228     228.099 246.511 299.739  1.00  0.00           C  
ATOM   3678  C   GLY X 228     226.823 246.338 300.557  1.00  0.00           C  
ATOM   3679  O   GLY X 228     225.818 245.764 300.111  1.00  0.00           O  
ATOM   3680  H   GLY X 228     228.579 245.433 298.006  1.00  0.00           H  
ATOM   3681  HA2 GLY X 228     228.943 246.749 300.385  1.00  0.00           H  
ATOM   3682  HA3 GLY X 228     227.773 247.312 299.075  1.00  0.00           H  
ATOM   3683  N   THR X 229     226.792 246.957 301.726  1.00  0.00           N  
ATOM   3684  CA  THR X 229     225.858 246.893 302.928  1.00  0.00           C  
ATOM   3685  C   THR X 229     225.759 245.430 303.444  1.00  0.00           C  
ATOM   3686  O   THR X 229     225.793 245.338 304.672  1.00  0.00           O  
ATOM   3687  CB  THR X 229     224.527 247.531 302.678  1.00  0.00           C  
ATOM   3688  CG2 THR X 229     224.647 249.035 302.266  1.00  0.00           C  
ATOM   3689  OG1 THR X 229     223.859 246.776 301.630  1.00  0.00           O  
ATOM   3690  H   THR X 229     227.676 247.370 301.988  1.00  0.00           H  
ATOM   3691  HA  THR X 229     226.257 247.504 303.737  1.00  0.00           H  
ATOM   3692  HB  THR X 229     223.950 247.503 303.602  1.00  0.00           H  
ATOM   3693  HG1 THR X 229     224.587 246.769 301.003  1.00  0.00           H  
ATOM   3694 HG21 THR X 229     223.661 249.500 302.270  1.00  0.00           H  
ATOM   3695 HG22 THR X 229     225.123 249.251 301.310  1.00  0.00           H  
ATOM   3696 HG23 THR X 229     225.290 249.480 303.025  1.00  0.00           H  
ATOM   3697  N   HID X 230     225.802 244.364 302.655  1.00  0.00           N  
ATOM   3698  CA  HID X 230     225.877 242.988 303.232  1.00  0.00           C  
ATOM   3699  C   HID X 230     227.169 242.852 304.048  1.00  0.00           C  
ATOM   3700  O   HID X 230     227.142 242.254 305.154  1.00  0.00           O  
ATOM   3701  CB  HID X 230     225.804 241.913 302.151  1.00  0.00           C  
ATOM   3702  CG  HID X 230     224.574 241.853 301.211  1.00  0.00           C  
ATOM   3703  CD2 HID X 230     223.334 241.579 301.590  1.00  0.00           C  
ATOM   3704  ND1 HID X 230     224.514 242.127 299.832  1.00  0.00           N  
ATOM   3705  CE1 HID X 230     223.272 241.929 299.445  1.00  0.00           C  
ATOM   3706  NE2 HID X 230     222.521 241.575 300.465  1.00  0.00           N  
ATOM   3707  H   HID X 230     225.623 244.438 301.664  1.00  0.00           H  
ATOM   3708  HA  HID X 230     225.035 242.872 303.914  1.00  0.00           H  
ATOM   3709  HB2 HID X 230     226.702 241.969 301.535  1.00  0.00           H  
ATOM   3710  HB3 HID X 230     225.955 240.909 302.548  1.00  0.00           H  
ATOM   3711  HD1 HID X 230     225.284 242.142 299.178  1.00  0.00           H  
ATOM   3712  HD2 HID X 230     223.015 241.457 302.614  1.00  0.00           H  
ATOM   3713  HE1 HID X 230     223.071 241.881 298.385  1.00  0.00           H  
ATOM   3714  N   ASN X 231     228.268 243.514 303.663  1.00  0.00           N  
ATOM   3715  CA  ASN X 231     229.504 243.786 304.419  1.00  0.00           C  
ATOM   3716  C   ASN X 231     229.292 244.518 305.768  1.00  0.00           C  
ATOM   3717  O   ASN X 231     229.913 244.167 306.784  1.00  0.00           O  
ATOM   3718  CB  ASN X 231     230.542 244.492 303.549  1.00  0.00           C  
ATOM   3719  CG  ASN X 231     230.307 245.944 303.188  1.00  0.00           C  
ATOM   3720  ND2 ASN X 231     231.338 246.765 303.047  1.00  0.00           N  
ATOM   3721  OD1 ASN X 231     229.204 246.393 303.108  1.00  0.00           O  
ATOM   3722  H   ASN X 231     228.157 243.896 302.735  1.00  0.00           H  
ATOM   3723  HA  ASN X 231     229.935 242.809 304.636  1.00  0.00           H  
ATOM   3724  HB2 ASN X 231     231.452 244.472 304.149  1.00  0.00           H  
ATOM   3725  HB3 ASN X 231     230.737 243.853 302.688  1.00  0.00           H  
ATOM   3726 HD21 ASN X 231     232.283 246.414 302.984  1.00  0.00           H  
ATOM   3727 HD22 ASN X 231     231.069 247.737 302.990  1.00  0.00           H  
ATOM   3728  N   LYS X 232     228.478 245.542 305.732  1.00  0.00           N  
ATOM   3729  CA  LYS X 232     228.136 246.342 306.918  1.00  0.00           C  
ATOM   3730  C   LYS X 232     227.495 245.502 308.015  1.00  0.00           C  
ATOM   3731  O   LYS X 232     227.942 245.545 309.104  1.00  0.00           O  
ATOM   3732  CB  LYS X 232     227.156 247.544 306.507  1.00  0.00           C  
ATOM   3733  CG  LYS X 232     226.994 248.394 307.695  1.00  0.00           C  
ATOM   3734  CD  LYS X 232     228.261 249.152 308.060  1.00  0.00           C  
ATOM   3735  CE  LYS X 232     228.054 250.345 308.998  1.00  0.00           C  
ATOM   3736  NZ  LYS X 232     226.922 251.262 308.578  1.00  0.00           N1+
ATOM   3737  H   LYS X 232     228.188 245.833 304.809  1.00  0.00           H  
ATOM   3738  HA  LYS X 232     229.089 246.658 307.343  1.00  0.00           H  
ATOM   3739  HB2 LYS X 232     227.584 248.186 305.738  1.00  0.00           H  
ATOM   3740  HB3 LYS X 232     226.171 247.273 306.127  1.00  0.00           H  
ATOM   3741  HG2 LYS X 232     226.265 249.132 307.357  1.00  0.00           H  
ATOM   3742  HG3 LYS X 232     226.494 247.876 308.513  1.00  0.00           H  
ATOM   3743  HD2 LYS X 232     228.899 248.437 308.578  1.00  0.00           H  
ATOM   3744  HD3 LYS X 232     228.671 249.530 307.124  1.00  0.00           H  
ATOM   3745  HE2 LYS X 232     227.771 249.920 309.961  1.00  0.00           H  
ATOM   3746  HE3 LYS X 232     229.018 250.848 309.072  1.00  0.00           H  
ATOM   3747  HZ1 LYS X 232     226.812 252.049 309.201  1.00  0.00           H  
ATOM   3748  HZ2 LYS X 232     226.093 250.687 308.630  1.00  0.00           H  
ATOM   3749  HZ3 LYS X 232     227.037 251.564 307.621  1.00  0.00           H  
ATOM   3750  N   LEU X 233     226.534 244.647 307.676  1.00  0.00           N  
ATOM   3751  CA  LEU X 233     225.907 243.643 308.610  1.00  0.00           C  
ATOM   3752  C   LEU X 233     226.926 242.683 309.255  1.00  0.00           C  
ATOM   3753  O   LEU X 233     227.013 242.489 310.499  1.00  0.00           O  
ATOM   3754  CB  LEU X 233     224.763 242.814 307.845  1.00  0.00           C  
ATOM   3755  CG  LEU X 233     224.113 241.572 308.615  1.00  0.00           C  
ATOM   3756  CD1 LEU X 233     222.619 241.376 308.488  1.00  0.00           C  
ATOM   3757  CD2 LEU X 233     224.685 240.245 308.272  1.00  0.00           C  
ATOM   3758  H   LEU X 233     226.186 244.770 306.736  1.00  0.00           H  
ATOM   3759  HA  LEU X 233     225.306 244.171 309.351  1.00  0.00           H  
ATOM   3760  HB2 LEU X 233     223.939 243.526 307.794  1.00  0.00           H  
ATOM   3761  HB3 LEU X 233     224.919 242.597 306.789  1.00  0.00           H  
ATOM   3762  HG  LEU X 233     224.303 241.784 309.667  1.00  0.00           H  
ATOM   3763 HD11 LEU X 233     222.033 242.277 308.666  1.00  0.00           H  
ATOM   3764 HD12 LEU X 233     222.165 240.736 309.246  1.00  0.00           H  
ATOM   3765 HD13 LEU X 233     222.403 240.903 307.530  1.00  0.00           H  
ATOM   3766 HD21 LEU X 233     224.892 240.312 307.204  1.00  0.00           H  
ATOM   3767 HD22 LEU X 233     225.554 240.057 308.904  1.00  0.00           H  
ATOM   3768 HD23 LEU X 233     223.956 239.461 308.479  1.00  0.00           H  
ATOM   3769  N   LEU X 234     227.791 242.167 308.328  1.00  0.00           N  
ATOM   3770  CA  LEU X 234     229.008 241.352 308.698  1.00  0.00           C  
ATOM   3771  C   LEU X 234     229.996 242.022 309.628  1.00  0.00           C  
ATOM   3772  O   LEU X 234     230.434 241.364 310.581  1.00  0.00           O  
ATOM   3773  CB  LEU X 234     229.650 240.748 307.498  1.00  0.00           C  
ATOM   3774  CG  LEU X 234     228.876 239.575 306.823  1.00  0.00           C  
ATOM   3775  CD1 LEU X 234     229.372 239.176 305.431  1.00  0.00           C  
ATOM   3776  CD2 LEU X 234     228.949 238.330 307.725  1.00  0.00           C  
ATOM   3777  H   LEU X 234     227.459 242.335 307.389  1.00  0.00           H  
ATOM   3778  HA  LEU X 234     228.668 240.539 309.339  1.00  0.00           H  
ATOM   3779  HB2 LEU X 234     229.749 241.531 306.746  1.00  0.00           H  
ATOM   3780  HB3 LEU X 234     230.623 240.310 307.722  1.00  0.00           H  
ATOM   3781  HG  LEU X 234     227.877 239.974 306.646  1.00  0.00           H  
ATOM   3782 HD11 LEU X 234     229.499 240.095 304.858  1.00  0.00           H  
ATOM   3783 HD12 LEU X 234     228.555 238.625 304.965  1.00  0.00           H  
ATOM   3784 HD13 LEU X 234     230.311 238.627 305.498  1.00  0.00           H  
ATOM   3785 HD21 LEU X 234     229.961 238.254 308.123  1.00  0.00           H  
ATOM   3786 HD22 LEU X 234     228.173 238.365 308.490  1.00  0.00           H  
ATOM   3787 HD23 LEU X 234     228.645 237.413 307.219  1.00  0.00           H  
ATOM   3788  N   LYS X 235     230.394 243.285 309.474  1.00  0.00           N  
ATOM   3789  CA  LYS X 235     231.241 243.921 310.469  1.00  0.00           C  
ATOM   3790  C   LYS X 235     230.399 244.294 311.722  1.00  0.00           C  
ATOM   3791  O   LYS X 235     230.954 244.132 312.790  1.00  0.00           O  
ATOM   3792  CB  LYS X 235     232.055 244.965 309.764  1.00  0.00           C  
ATOM   3793  CG  LYS X 235     233.104 244.366 308.778  1.00  0.00           C  
ATOM   3794  CD  LYS X 235     233.714 245.518 307.980  1.00  0.00           C  
ATOM   3795  CE  LYS X 235     234.395 244.913 306.723  1.00  0.00           C  
ATOM   3796  NZ  LYS X 235     234.704 245.999 305.788  1.00  0.00           N1+
ATOM   3797  H   LYS X 235     230.095 243.778 308.645  1.00  0.00           H  
ATOM   3798  HA  LYS X 235     231.984 243.272 310.933  1.00  0.00           H  
ATOM   3799  HB2 LYS X 235     231.402 245.602 309.167  1.00  0.00           H  
ATOM   3800  HB3 LYS X 235     232.514 245.615 310.510  1.00  0.00           H  
ATOM   3801  HG2 LYS X 235     233.925 243.893 309.317  1.00  0.00           H  
ATOM   3802  HG3 LYS X 235     232.552 243.626 308.199  1.00  0.00           H  
ATOM   3803  HD2 LYS X 235     232.990 246.297 307.740  1.00  0.00           H  
ATOM   3804  HD3 LYS X 235     234.509 245.992 308.556  1.00  0.00           H  
ATOM   3805  HE2 LYS X 235     235.255 244.307 307.011  1.00  0.00           H  
ATOM   3806  HE3 LYS X 235     233.684 244.225 306.266  1.00  0.00           H  
ATOM   3807  HZ1 LYS X 235     233.871 246.490 305.494  1.00  0.00           H  
ATOM   3808  HZ2 LYS X 235     235.387 245.686 305.113  1.00  0.00           H  
ATOM   3809  HZ3 LYS X 235     235.162 246.699 306.353  1.00  0.00           H  
ATOM   3810  N   ASN X 236     229.124 244.722 311.677  1.00  0.00           N  
ATOM   3811  CA  ASN X 236     228.360 245.121 312.850  1.00  0.00           C  
ATOM   3812  C   ASN X 236     228.137 243.905 313.744  1.00  0.00           C  
ATOM   3813  O   ASN X 236     228.270 244.128 314.964  1.00  0.00           O  
ATOM   3814  CB  ASN X 236     226.934 245.588 312.342  1.00  0.00           C  
ATOM   3815  CG  ASN X 236     226.797 246.889 311.635  1.00  0.00           C  
ATOM   3816  ND2 ASN X 236     225.585 247.224 311.260  1.00  0.00           N  
ATOM   3817  OD1 ASN X 236     227.665 247.757 311.651  1.00  0.00           O  
ATOM   3818  H   ASN X 236     228.686 244.754 310.768  1.00  0.00           H  
ATOM   3819  HA  ASN X 236     228.824 245.907 313.445  1.00  0.00           H  
ATOM   3820  HB2 ASN X 236     226.643 244.849 311.596  1.00  0.00           H  
ATOM   3821  HB3 ASN X 236     226.159 245.713 313.099  1.00  0.00           H  
ATOM   3822 HD21 ASN X 236     224.770 246.630 311.310  1.00  0.00           H  
ATOM   3823 HD22 ASN X 236     225.399 248.186 311.016  1.00  0.00           H  
ATOM   3824  N   VAL X 237     227.971 242.649 313.263  1.00  0.00           N  
ATOM   3825  CA  VAL X 237     227.859 241.465 314.172  1.00  0.00           C  
ATOM   3826  C   VAL X 237     229.198 241.044 314.866  1.00  0.00           C  
ATOM   3827  O   VAL X 237     229.202 240.674 316.002  1.00  0.00           O  
ATOM   3828  CB  VAL X 237     227.263 240.328 313.415  1.00  0.00           C  
ATOM   3829  CG1 VAL X 237     228.056 239.482 312.383  1.00  0.00           C  
ATOM   3830  CG2 VAL X 237     226.795 239.297 314.519  1.00  0.00           C  
ATOM   3831  H   VAL X 237     227.894 242.443 312.278  1.00  0.00           H  
ATOM   3832  HA  VAL X 237     227.155 241.698 314.970  1.00  0.00           H  
ATOM   3833  HB  VAL X 237     226.360 240.672 312.910  1.00  0.00           H  
ATOM   3834 HG11 VAL X 237     228.615 240.154 311.731  1.00  0.00           H  
ATOM   3835 HG12 VAL X 237     228.771 238.907 312.971  1.00  0.00           H  
ATOM   3836 HG13 VAL X 237     227.501 238.726 311.828  1.00  0.00           H  
ATOM   3837 HG21 VAL X 237     225.958 239.680 315.102  1.00  0.00           H  
ATOM   3838 HG22 VAL X 237     227.627 238.954 315.134  1.00  0.00           H  
ATOM   3839 HG23 VAL X 237     226.389 238.439 313.984  1.00  0.00           H  
ATOM   3840  N   ALA X 238     230.332 241.374 314.228  1.00  0.00           N  
ATOM   3841  CA  ALA X 238     231.698 241.116 314.765  1.00  0.00           C  
ATOM   3842  C   ALA X 238     232.011 242.180 315.808  1.00  0.00           C  
ATOM   3843  O   ALA X 238     232.499 241.900 316.868  1.00  0.00           O  
ATOM   3844  CB  ALA X 238     232.668 240.981 313.613  1.00  0.00           C  
ATOM   3845  H   ALA X 238     230.213 241.700 313.279  1.00  0.00           H  
ATOM   3846  HA  ALA X 238     231.828 240.171 315.293  1.00  0.00           H  
ATOM   3847  HB1 ALA X 238     232.371 240.125 313.007  1.00  0.00           H  
ATOM   3848  HB2 ALA X 238     233.735 240.902 313.820  1.00  0.00           H  
ATOM   3849  HB3 ALA X 238     232.557 241.864 312.983  1.00  0.00           H  
ATOM   3850  N   PHE X 239     231.543 243.374 315.541  1.00  0.00           N  
ATOM   3851  CA  PHE X 239     231.508 244.571 316.404  1.00  0.00           C  
ATOM   3852  C   PHE X 239     230.596 244.384 317.640  1.00  0.00           C  
ATOM   3853  O   PHE X 239     231.034 244.808 318.686  1.00  0.00           O  
ATOM   3854  CB  PHE X 239     231.197 245.686 315.443  1.00  0.00           C  
ATOM   3855  CG  PHE X 239     231.133 247.104 316.082  1.00  0.00           C  
ATOM   3856  CD1 PHE X 239     232.262 247.905 315.915  1.00  0.00           C  
ATOM   3857  CD2 PHE X 239     230.015 247.595 316.780  1.00  0.00           C  
ATOM   3858  CE1 PHE X 239     232.431 249.110 316.591  1.00  0.00           C  
ATOM   3859  CE2 PHE X 239     230.078 248.821 317.376  1.00  0.00           C  
ATOM   3860  CZ  PHE X 239     231.273 249.597 317.289  1.00  0.00           C  
ATOM   3861  H   PHE X 239     231.206 243.504 314.598  1.00  0.00           H  
ATOM   3862  HA  PHE X 239     232.507 244.769 316.792  1.00  0.00           H  
ATOM   3863  HB2 PHE X 239     231.930 245.819 314.647  1.00  0.00           H  
ATOM   3864  HB3 PHE X 239     230.204 245.459 315.055  1.00  0.00           H  
ATOM   3865  HD1 PHE X 239     233.092 247.520 315.341  1.00  0.00           H  
ATOM   3866  HD2 PHE X 239     229.112 247.016 316.907  1.00  0.00           H  
ATOM   3867  HE1 PHE X 239     233.319 249.722 316.530  1.00  0.00           H  
ATOM   3868  HE2 PHE X 239     229.224 249.239 317.889  1.00  0.00           H  
ATOM   3869  HZ  PHE X 239     231.448 250.544 317.778  1.00  0.00           H  
ATOM   3870  N   MET X 240     229.341 243.859 317.462  1.00  0.00           N  
ATOM   3871  CA  MET X 240     228.480 243.452 318.615  1.00  0.00           C  
ATOM   3872  C   MET X 240     228.986 242.226 319.438  1.00  0.00           C  
ATOM   3873  O   MET X 240     228.741 242.135 320.643  1.00  0.00           O  
ATOM   3874  CB  MET X 240     227.081 243.274 318.139  1.00  0.00           C  
ATOM   3875  CG  MET X 240     226.523 244.615 317.659  1.00  0.00           C  
ATOM   3876  SD  MET X 240     224.742 244.514 317.271  1.00  0.00           S  
ATOM   3877  CE  MET X 240     224.784 243.791 315.587  1.00  0.00           C  
ATOM   3878  H   MET X 240     229.047 243.536 316.551  1.00  0.00           H  
ATOM   3879  HA  MET X 240     228.359 244.254 319.343  1.00  0.00           H  
ATOM   3880  HB2 MET X 240     226.901 242.511 317.381  1.00  0.00           H  
ATOM   3881  HB3 MET X 240     226.496 242.957 319.002  1.00  0.00           H  
ATOM   3882  HG2 MET X 240     226.685 245.466 318.320  1.00  0.00           H  
ATOM   3883  HG3 MET X 240     227.061 245.033 316.808  1.00  0.00           H  
ATOM   3884  HE1 MET X 240     223.879 243.648 314.997  1.00  0.00           H  
ATOM   3885  HE2 MET X 240     225.440 244.401 314.966  1.00  0.00           H  
ATOM   3886  HE3 MET X 240     225.260 242.811 315.635  1.00  0.00           H  
ATOM   3887  N   LYS X 241     229.757 241.317 318.795  1.00  0.00           N  
ATOM   3888  CA  LYS X 241     230.441 240.199 319.549  1.00  0.00           C  
ATOM   3889  C   LYS X 241     231.542 240.729 320.392  1.00  0.00           C  
ATOM   3890  O   LYS X 241     231.659 240.408 321.585  1.00  0.00           O  
ATOM   3891  CB  LYS X 241     230.944 239.058 318.658  1.00  0.00           C  
ATOM   3892  CG  LYS X 241     229.853 238.228 317.937  1.00  0.00           C  
ATOM   3893  CD  LYS X 241     230.400 237.481 316.715  1.00  0.00           C  
ATOM   3894  CE  LYS X 241     231.703 236.755 317.065  1.00  0.00           C  
ATOM   3895  NZ  LYS X 241     232.145 235.817 316.012  1.00  0.00           N1+
ATOM   3896  H   LYS X 241     229.796 241.221 317.790  1.00  0.00           H  
ATOM   3897  HA  LYS X 241     229.740 239.815 320.290  1.00  0.00           H  
ATOM   3898  HB2 LYS X 241     231.694 239.405 317.947  1.00  0.00           H  
ATOM   3899  HB3 LYS X 241     231.567 238.470 319.333  1.00  0.00           H  
ATOM   3900  HG2 LYS X 241     229.588 237.508 318.712  1.00  0.00           H  
ATOM   3901  HG3 LYS X 241     229.050 238.865 317.567  1.00  0.00           H  
ATOM   3902  HD2 LYS X 241     229.683 236.783 316.284  1.00  0.00           H  
ATOM   3903  HD3 LYS X 241     230.571 238.148 315.870  1.00  0.00           H  
ATOM   3904  HE2 LYS X 241     232.518 237.469 317.187  1.00  0.00           H  
ATOM   3905  HE3 LYS X 241     231.577 236.271 318.033  1.00  0.00           H  
ATOM   3906  HZ1 LYS X 241     232.329 236.336 315.165  1.00  0.00           H  
ATOM   3907  HZ2 LYS X 241     231.483 235.088 315.789  1.00  0.00           H  
ATOM   3908  HZ3 LYS X 241     233.016 235.349 316.219  1.00  0.00           H  
ATOM   3909  N   SER X 242     232.367 241.635 319.902  1.00  0.00           N  
ATOM   3910  CA  SER X 242     233.413 242.354 320.626  1.00  0.00           C  
ATOM   3911  C   SER X 242     232.771 243.401 321.649  1.00  0.00           C  
ATOM   3912  O   SER X 242     233.288 243.507 322.770  1.00  0.00           O  
ATOM   3913  CB  SER X 242     234.394 243.034 319.655  1.00  0.00           C  
ATOM   3914  OG  SER X 242     233.828 244.196 319.185  1.00  0.00           O  
ATOM   3915  H   SER X 242     232.188 241.914 318.948  1.00  0.00           H  
ATOM   3916  HA  SER X 242     233.935 241.600 321.215  1.00  0.00           H  
ATOM   3917  HB2 SER X 242     235.367 243.099 320.141  1.00  0.00           H  
ATOM   3918  HB3 SER X 242     234.524 242.334 318.829  1.00  0.00           H  
ATOM   3919  HG  SER X 242     234.166 244.345 318.299  1.00  0.00           H  
ATOM   3920  N   TYR X 243     231.742 244.173 321.263  1.00  0.00           N  
ATOM   3921  CA  TYR X 243     231.090 245.119 322.277  1.00  0.00           C  
ATOM   3922  C   TYR X 243     230.705 244.385 323.537  1.00  0.00           C  
ATOM   3923  O   TYR X 243     231.072 244.842 324.654  1.00  0.00           O  
ATOM   3924  CB  TYR X 243     229.895 245.772 321.561  1.00  0.00           C  
ATOM   3925  CG  TYR X 243     229.122 246.765 322.380  1.00  0.00           C  
ATOM   3926  CD1 TYR X 243     229.188 248.155 322.115  1.00  0.00           C  
ATOM   3927  CD2 TYR X 243     228.190 246.294 323.360  1.00  0.00           C  
ATOM   3928  CE1 TYR X 243     228.429 248.986 322.859  1.00  0.00           C  
ATOM   3929  CE2 TYR X 243     227.451 247.192 324.198  1.00  0.00           C  
ATOM   3930  CZ  TYR X 243     227.626 248.547 323.939  1.00  0.00           C  
ATOM   3931  OH  TYR X 243     226.822 249.398 324.541  1.00  0.00           O  
ATOM   3932  H   TYR X 243     231.560 244.162 320.270  1.00  0.00           H  
ATOM   3933  HA  TYR X 243     231.809 245.887 322.563  1.00  0.00           H  
ATOM   3934  HB2 TYR X 243     230.164 246.288 320.639  1.00  0.00           H  
ATOM   3935  HB3 TYR X 243     229.330 244.858 321.383  1.00  0.00           H  
ATOM   3936  HD1 TYR X 243     229.871 248.479 321.345  1.00  0.00           H  
ATOM   3937  HD2 TYR X 243     228.112 245.238 323.570  1.00  0.00           H  
ATOM   3938  HE1 TYR X 243     228.511 250.050 322.691  1.00  0.00           H  
ATOM   3939  HE2 TYR X 243     226.775 246.860 324.973  1.00  0.00           H  
ATOM   3940  HH  TYR X 243     226.864 250.297 324.208  1.00  0.00           H  
ATOM   3941  N   ILE X 244     230.111 243.231 323.370  1.00  0.00           N  
ATOM   3942  CA  ILE X 244     229.714 242.450 324.557  1.00  0.00           C  
ATOM   3943  C   ILE X 244     230.846 241.668 325.225  1.00  0.00           C  
ATOM   3944  O   ILE X 244     230.689 241.421 326.427  1.00  0.00           O  
ATOM   3945  CB  ILE X 244     228.501 241.579 324.156  1.00  0.00           C  
ATOM   3946  CG1 ILE X 244     227.507 241.259 325.290  1.00  0.00           C  
ATOM   3947  CG2 ILE X 244     228.872 240.377 323.408  1.00  0.00           C  
ATOM   3948  CD1 ILE X 244     227.100 242.457 326.128  1.00  0.00           C  
ATOM   3949  H   ILE X 244     230.198 242.799 322.462  1.00  0.00           H  
ATOM   3950  HA  ILE X 244     229.361 243.033 325.407  1.00  0.00           H  
ATOM   3951  HB  ILE X 244     227.910 242.212 323.495  1.00  0.00           H  
ATOM   3952 HG12 ILE X 244     226.599 240.883 324.818  1.00  0.00           H  
ATOM   3953 HG13 ILE X 244     227.924 240.497 325.948  1.00  0.00           H  
ATOM   3954 HG21 ILE X 244     229.544 240.495 322.557  1.00  0.00           H  
ATOM   3955 HG22 ILE X 244     227.933 240.058 322.957  1.00  0.00           H  
ATOM   3956 HG23 ILE X 244     229.191 239.662 324.166  1.00  0.00           H  
ATOM   3957 HD11 ILE X 244     227.330 243.381 325.597  1.00  0.00           H  
ATOM   3958 HD12 ILE X 244     227.741 242.471 327.010  1.00  0.00           H  
ATOM   3959 HD13 ILE X 244     226.047 242.471 326.406  1.00  0.00           H  
ATOM   3960  N   LEU X 245     231.957 241.227 324.555  1.00  0.00           N  
ATOM   3961  CA  LEU X 245     233.088 240.568 325.121  1.00  0.00           C  
ATOM   3962  C   LEU X 245     233.786 241.446 326.163  1.00  0.00           C  
ATOM   3963  O   LEU X 245     234.336 240.962 327.136  1.00  0.00           O  
ATOM   3964  CB  LEU X 245     234.033 240.033 324.028  1.00  0.00           C  
ATOM   3965  CG  LEU X 245     235.080 239.040 324.454  1.00  0.00           C  
ATOM   3966  CD1 LEU X 245     234.417 237.833 324.988  1.00  0.00           C  
ATOM   3967  CD2 LEU X 245     235.937 238.554 323.230  1.00  0.00           C  
ATOM   3968  H   LEU X 245     231.919 241.311 323.549  1.00  0.00           H  
ATOM   3969  HA  LEU X 245     232.761 239.697 325.688  1.00  0.00           H  
ATOM   3970  HB2 LEU X 245     233.468 239.497 323.265  1.00  0.00           H  
ATOM   3971  HB3 LEU X 245     234.529 240.885 323.562  1.00  0.00           H  
ATOM   3972  HG  LEU X 245     235.775 239.553 325.119  1.00  0.00           H  
ATOM   3973 HD11 LEU X 245     235.146 237.031 325.101  1.00  0.00           H  
ATOM   3974 HD12 LEU X 245     233.643 237.386 324.365  1.00  0.00           H  
ATOM   3975 HD13 LEU X 245     234.075 238.096 325.989  1.00  0.00           H  
ATOM   3976 HD21 LEU X 245     235.322 237.958 322.556  1.00  0.00           H  
ATOM   3977 HD22 LEU X 245     236.421 239.350 322.665  1.00  0.00           H  
ATOM   3978 HD23 LEU X 245     236.762 237.899 323.510  1.00  0.00           H  
ATOM   3979  N   GLU X 246     233.792 242.790 326.023  1.00  0.00           N  
ATOM   3980  CA  GLU X 246     234.068 243.739 327.118  1.00  0.00           C  
ATOM   3981  C   GLU X 246     233.391 243.466 328.492  1.00  0.00           C  
ATOM   3982  O   GLU X 246     234.070 243.226 329.500  1.00  0.00           O  
ATOM   3983  CB  GLU X 246     233.855 245.160 326.624  1.00  0.00           C  
ATOM   3984  CG  GLU X 246     234.185 246.227 327.627  1.00  0.00           C  
ATOM   3985  CD  GLU X 246     235.655 246.330 327.975  1.00  0.00           C  
ATOM   3986  OE1 GLU X 246     236.575 245.956 327.185  1.00  0.00           O  
ATOM   3987  OE2 GLU X 246     236.020 246.892 329.017  1.00  0.00           O1-
ATOM   3988  H   GLU X 246     233.344 243.121 325.181  1.00  0.00           H  
ATOM   3989  HA  GLU X 246     235.124 243.642 327.371  1.00  0.00           H  
ATOM   3990  HB2 GLU X 246     234.445 245.372 325.732  1.00  0.00           H  
ATOM   3991  HB3 GLU X 246     232.815 245.299 326.332  1.00  0.00           H  
ATOM   3992  HG2 GLU X 246     233.822 247.162 327.200  1.00  0.00           H  
ATOM   3993  HG3 GLU X 246     233.550 246.043 328.494  1.00  0.00           H  
ATOM   3994  N   LYS X 247     231.995 243.358 328.424  1.00  0.00           N  
ATOM   3995  CA  LYS X 247     231.103 243.088 329.535  1.00  0.00           C  
ATOM   3996  C   LYS X 247     231.236 241.624 330.080  1.00  0.00           C  
ATOM   3997  O   LYS X 247     231.008 241.487 331.279  1.00  0.00           O  
ATOM   3998  CB  LYS X 247     229.589 243.352 329.266  1.00  0.00           C  
ATOM   3999  CG  LYS X 247     229.364 244.727 328.528  1.00  0.00           C  
ATOM   4000  CD  LYS X 247     229.595 245.978 329.424  1.00  0.00           C  
ATOM   4001  CE  LYS X 247     231.053 246.450 329.394  1.00  0.00           C  
ATOM   4002  NZ  LYS X 247     231.314 247.498 330.447  1.00  0.00           N1+
ATOM   4003  H   LYS X 247     231.600 243.263 327.499  1.00  0.00           H  
ATOM   4004  HA  LYS X 247     231.462 243.667 330.386  1.00  0.00           H  
ATOM   4005  HB2 LYS X 247     229.233 242.592 328.570  1.00  0.00           H  
ATOM   4006  HB3 LYS X 247     229.089 243.277 330.231  1.00  0.00           H  
ATOM   4007  HG2 LYS X 247     229.862 244.795 327.560  1.00  0.00           H  
ATOM   4008  HG3 LYS X 247     228.303 244.718 328.280  1.00  0.00           H  
ATOM   4009  HD2 LYS X 247     228.965 246.741 328.967  1.00  0.00           H  
ATOM   4010  HD3 LYS X 247     229.271 245.723 330.433  1.00  0.00           H  
ATOM   4011  HE2 LYS X 247     231.703 245.584 329.518  1.00  0.00           H  
ATOM   4012  HE3 LYS X 247     231.270 246.921 328.436  1.00  0.00           H  
ATOM   4013  HZ1 LYS X 247     231.447 247.099 331.365  1.00  0.00           H  
ATOM   4014  HZ2 LYS X 247     230.471 248.042 330.560  1.00  0.00           H  
ATOM   4015  HZ3 LYS X 247     232.066 248.114 330.174  1.00  0.00           H  
ATOM   4016  N   VAL X 248     231.629 240.576 329.245  1.00  0.00           N  
ATOM   4017  CA  VAL X 248     231.970 239.247 329.634  1.00  0.00           C  
ATOM   4018  C   VAL X 248     233.286 239.316 330.445  1.00  0.00           C  
ATOM   4019  O   VAL X 248     233.357 238.738 331.548  1.00  0.00           O  
ATOM   4020  CB  VAL X 248     232.084 238.322 328.442  1.00  0.00           C  
ATOM   4021  CG1 VAL X 248     232.753 236.937 328.520  1.00  0.00           C  
ATOM   4022  CG2 VAL X 248     230.681 238.102 327.852  1.00  0.00           C  
ATOM   4023  H   VAL X 248     231.701 240.782 328.259  1.00  0.00           H  
ATOM   4024  HA  VAL X 248     231.234 238.815 330.313  1.00  0.00           H  
ATOM   4025  HB  VAL X 248     232.621 238.910 327.698  1.00  0.00           H  
ATOM   4026 HG11 VAL X 248     233.791 236.965 328.852  1.00  0.00           H  
ATOM   4027 HG12 VAL X 248     232.195 236.241 329.146  1.00  0.00           H  
ATOM   4028 HG13 VAL X 248     232.769 236.573 327.493  1.00  0.00           H  
ATOM   4029 HG21 VAL X 248     230.141 239.016 327.606  1.00  0.00           H  
ATOM   4030 HG22 VAL X 248     230.017 237.707 328.621  1.00  0.00           H  
ATOM   4031 HG23 VAL X 248     230.794 237.515 326.940  1.00  0.00           H  
ATOM   4032  N   LYS X 249     234.305 239.969 329.868  1.00  0.00           N  
ATOM   4033  CA  LYS X 249     235.690 239.936 330.416  1.00  0.00           C  
ATOM   4034  C   LYS X 249     235.773 240.779 331.650  1.00  0.00           C  
ATOM   4035  O   LYS X 249     236.624 240.527 332.553  1.00  0.00           O  
ATOM   4036  CB  LYS X 249     236.676 240.484 329.385  1.00  0.00           C  
ATOM   4037  CG  LYS X 249     236.790 239.556 328.198  1.00  0.00           C  
ATOM   4038  CD  LYS X 249     237.658 240.144 327.039  1.00  0.00           C  
ATOM   4039  CE  LYS X 249     238.256 239.125 326.075  1.00  0.00           C  
ATOM   4040  NZ  LYS X 249     239.149 238.133 326.782  1.00  0.00           N1+
ATOM   4041  H   LYS X 249     234.271 240.332 328.927  1.00  0.00           H  
ATOM   4042  HA  LYS X 249     235.905 238.879 330.575  1.00  0.00           H  
ATOM   4043  HB2 LYS X 249     236.340 241.456 329.023  1.00  0.00           H  
ATOM   4044  HB3 LYS X 249     237.630 240.633 329.891  1.00  0.00           H  
ATOM   4045  HG2 LYS X 249     237.279 238.624 328.481  1.00  0.00           H  
ATOM   4046  HG3 LYS X 249     235.859 239.177 327.777  1.00  0.00           H  
ATOM   4047  HD2 LYS X 249     237.045 240.865 326.497  1.00  0.00           H  
ATOM   4048  HD3 LYS X 249     238.568 240.580 327.452  1.00  0.00           H  
ATOM   4049  HE2 LYS X 249     237.507 238.644 325.447  1.00  0.00           H  
ATOM   4050  HE3 LYS X 249     238.845 239.639 325.315  1.00  0.00           H  
ATOM   4051  HZ1 LYS X 249     239.938 238.591 327.215  1.00  0.00           H  
ATOM   4052  HZ2 LYS X 249     239.500 237.468 326.108  1.00  0.00           H  
ATOM   4053  HZ3 LYS X 249     238.631 237.675 327.519  1.00  0.00           H  
ATOM   4054  N   GLU X 250     234.945 241.822 331.783  1.00  0.00           N  
ATOM   4055  CA  GLU X 250     234.671 242.641 332.969  1.00  0.00           C  
ATOM   4056  C   GLU X 250     234.084 241.902 334.146  1.00  0.00           C  
ATOM   4057  O   GLU X 250     234.673 241.878 335.242  1.00  0.00           O  
ATOM   4058  CB  GLU X 250     233.926 243.889 332.500  1.00  0.00           C  
ATOM   4059  CG  GLU X 250     233.485 244.914 333.585  1.00  0.00           C  
ATOM   4060  CD  GLU X 250     232.512 245.924 332.881  1.00  0.00           C  
ATOM   4061  OE1 GLU X 250     232.680 247.142 333.081  1.00  0.00           O  
ATOM   4062  OE2 GLU X 250     231.509 245.496 332.250  1.00  0.00           O1-
ATOM   4063  H   GLU X 250     234.379 242.027 330.971  1.00  0.00           H  
ATOM   4064  HA  GLU X 250     235.651 242.974 333.309  1.00  0.00           H  
ATOM   4065  HB2 GLU X 250     234.697 244.416 331.938  1.00  0.00           H  
ATOM   4066  HB3 GLU X 250     232.959 243.616 332.077  1.00  0.00           H  
ATOM   4067  HG2 GLU X 250     232.914 244.387 334.349  1.00  0.00           H  
ATOM   4068  HG3 GLU X 250     234.428 245.306 333.966  1.00  0.00           H  
ATOM   4069  N   HIP X 251     233.112 241.034 333.887  1.00  0.00           N  
ATOM   4070  CA  HIP X 251     232.625 240.179 335.012  1.00  0.00           C  
ATOM   4071  C   HIP X 251     233.547 238.941 335.347  1.00  0.00           C  
ATOM   4072  O   HIP X 251     233.696 238.626 336.489  1.00  0.00           O  
ATOM   4073  CB  HIP X 251     231.181 239.633 334.612  1.00  0.00           C  
ATOM   4074  CG  HIP X 251     230.067 240.664 334.740  1.00  0.00           C  
ATOM   4075  CD2 HIP X 251     230.019 241.926 334.199  1.00  0.00           C  
ATOM   4076  ND1 HIP X 251     228.823 240.484 335.385  1.00  0.00           N1+
ATOM   4077  CE1 HIP X 251     228.133 241.647 335.248  1.00  0.00           C  
ATOM   4078  NE2 HIP X 251     228.812 242.547 334.469  1.00  0.00           N  
ATOM   4079  H   HIP X 251     232.844 240.851 332.931  1.00  0.00           H  
ATOM   4080  HA  HIP X 251     232.495 240.736 335.940  1.00  0.00           H  
ATOM   4081  HB2 HIP X 251     231.208 239.236 333.597  1.00  0.00           H  
ATOM   4082  HB3 HIP X 251     230.938 238.842 335.321  1.00  0.00           H  
ATOM   4083  HD1 HIP X 251     228.521 239.699 335.945  1.00  0.00           H  
ATOM   4084  HD2 HIP X 251     230.797 242.387 333.609  1.00  0.00           H  
ATOM   4085  HE1 HIP X 251     227.273 241.842 335.872  1.00  0.00           H  
ATOM   4086  HE2 HIP X 251     228.516 243.452 334.131  1.00  0.00           H  
ATOM   4087  N   GLN X 252     234.230 238.362 334.363  1.00  0.00           N  
ATOM   4088  CA  GLN X 252     235.345 237.426 334.654  1.00  0.00           C  
ATOM   4089  C   GLN X 252     236.428 238.112 335.464  1.00  0.00           C  
ATOM   4090  O   GLN X 252     236.924 237.423 336.366  1.00  0.00           O  
ATOM   4091  CB  GLN X 252     235.835 236.990 333.236  1.00  0.00           C  
ATOM   4092  CG  GLN X 252     236.732 235.768 333.234  1.00  0.00           C  
ATOM   4093  CD  GLN X 252     237.529 235.486 331.960  1.00  0.00           C  
ATOM   4094  NE2 GLN X 252     238.196 234.394 331.819  1.00  0.00           N  
ATOM   4095  OE1 GLN X 252     237.615 236.259 331.035  1.00  0.00           O  
ATOM   4096  H   GLN X 252     234.176 238.679 333.405  1.00  0.00           H  
ATOM   4097  HA  GLN X 252     234.939 236.580 335.209  1.00  0.00           H  
ATOM   4098  HB2 GLN X 252     234.924 236.683 332.723  1.00  0.00           H  
ATOM   4099  HB3 GLN X 252     236.311 237.806 332.691  1.00  0.00           H  
ATOM   4100  HG2 GLN X 252     237.385 235.845 334.103  1.00  0.00           H  
ATOM   4101  HG3 GLN X 252     236.045 234.942 333.423  1.00  0.00           H  
ATOM   4102 HE21 GLN X 252     238.952 234.262 331.162  1.00  0.00           H  
ATOM   4103 HE22 GLN X 252     238.166 233.734 332.583  1.00  0.00           H  
ATOM   4104  N   GLU X 253     236.757 239.408 335.221  1.00  0.00           N  
ATOM   4105  CA  GLU X 253     237.710 240.083 336.115  1.00  0.00           C  
ATOM   4106  C   GLU X 253     237.246 240.174 337.571  1.00  0.00           C  
ATOM   4107  O   GLU X 253     237.976 239.929 338.517  1.00  0.00           O  
ATOM   4108  CB  GLU X 253     237.935 241.538 335.666  1.00  0.00           C  
ATOM   4109  CG  GLU X 253     239.185 242.069 336.351  1.00  0.00           C  
ATOM   4110  CD  GLU X 253     240.514 241.698 335.546  1.00  0.00           C  
ATOM   4111  OE1 GLU X 253     241.469 242.516 335.340  1.00  0.00           O  
ATOM   4112  OE2 GLU X 253     240.674 240.522 334.999  1.00  0.00           O1-
ATOM   4113  H   GLU X 253     236.443 239.886 334.389  1.00  0.00           H  
ATOM   4114  HA  GLU X 253     238.673 239.577 336.191  1.00  0.00           H  
ATOM   4115  HB2 GLU X 253     237.987 241.588 334.578  1.00  0.00           H  
ATOM   4116  HB3 GLU X 253     237.132 242.231 335.916  1.00  0.00           H  
ATOM   4117  HG2 GLU X 253     239.137 243.146 336.194  1.00  0.00           H  
ATOM   4118  HG3 GLU X 253     239.323 241.802 337.399  1.00  0.00           H  
ATOM   4119  N   SER X 254     235.936 240.412 337.873  1.00  0.00           N  
ATOM   4120  CA  SER X 254     235.257 240.305 339.221  1.00  0.00           C  
ATOM   4121  C   SER X 254     233.751 240.120 339.186  1.00  0.00           C  
ATOM   4122  O   SER X 254     233.010 240.851 338.481  1.00  0.00           O  
ATOM   4123  CB  SER X 254     235.533 241.561 340.001  1.00  0.00           C  
ATOM   4124  OG  SER X 254     235.205 241.274 341.382  1.00  0.00           O  
ATOM   4125  H   SER X 254     235.388 240.723 337.084  1.00  0.00           H  
ATOM   4126  HA  SER X 254     235.619 239.399 339.707  1.00  0.00           H  
ATOM   4127  HB2 SER X 254     236.562 241.890 339.860  1.00  0.00           H  
ATOM   4128  HB3 SER X 254     234.843 242.378 339.789  1.00  0.00           H  
ATOM   4129  HG  SER X 254     235.380 242.048 341.922  1.00  0.00           H  
ATOM   4130  N   MET X 255     233.213 239.154 339.889  1.00  0.00           N  
ATOM   4131  CA  MET X 255     231.788 238.847 340.174  1.00  0.00           C  
ATOM   4132  C   MET X 255     231.760 238.019 341.504  1.00  0.00           C  
ATOM   4133  O   MET X 255     232.816 237.731 342.059  1.00  0.00           O  
ATOM   4134  CB  MET X 255     231.163 237.979 339.041  1.00  0.00           C  
ATOM   4135  CG  MET X 255     231.909 236.638 338.724  1.00  0.00           C  
ATOM   4136  SD  MET X 255     231.077 235.587 337.545  1.00  0.00           S  
ATOM   4137  CE  MET X 255     229.975 234.637 338.603  1.00  0.00           C  
ATOM   4138  H   MET X 255     233.808 238.670 340.546  1.00  0.00           H  
ATOM   4139  HA  MET X 255     231.162 239.728 340.315  1.00  0.00           H  
ATOM   4140  HB2 MET X 255     230.127 237.874 339.366  1.00  0.00           H  
ATOM   4141  HB3 MET X 255     231.046 238.563 338.128  1.00  0.00           H  
ATOM   4142  HG2 MET X 255     232.810 236.975 338.212  1.00  0.00           H  
ATOM   4143  HG3 MET X 255     232.181 236.084 339.623  1.00  0.00           H  
ATOM   4144  HE1 MET X 255     229.168 235.259 338.991  1.00  0.00           H  
ATOM   4145  HE2 MET X 255     229.438 233.910 337.994  1.00  0.00           H  
ATOM   4146  HE3 MET X 255     230.561 234.197 339.410  1.00  0.00           H  
ATOM   4147  N   ASP X 256     230.558 237.593 341.967  1.00  0.00           N  
ATOM   4148  CA  ASP X 256     230.449 236.682 343.057  1.00  0.00           C  
ATOM   4149  C   ASP X 256     229.720 235.395 342.671  1.00  0.00           C  
ATOM   4150  O   ASP X 256     228.523 235.357 342.382  1.00  0.00           O  
ATOM   4151  CB  ASP X 256     229.652 237.431 344.113  1.00  0.00           C  
ATOM   4152  CG  ASP X 256     229.423 236.599 345.377  1.00  0.00           C  
ATOM   4153  OD1 ASP X 256     230.012 235.512 345.492  1.00  0.00           O  
ATOM   4154  OD2 ASP X 256     228.567 237.044 346.191  1.00  0.00           O1-
ATOM   4155  H   ASP X 256     229.723 237.952 341.526  1.00  0.00           H  
ATOM   4156  HA  ASP X 256     231.437 236.526 343.492  1.00  0.00           H  
ATOM   4157  HB2 ASP X 256     230.109 238.381 344.389  1.00  0.00           H  
ATOM   4158  HB3 ASP X 256     228.635 237.497 343.726  1.00  0.00           H  
ATOM   4159  N   MET X 257     230.546 234.332 342.654  1.00  0.00           N  
ATOM   4160  CA  MET X 257     230.086 232.927 342.375  1.00  0.00           C  
ATOM   4161  C   MET X 257     228.887 232.581 343.298  1.00  0.00           C  
ATOM   4162  O   MET X 257     227.995 231.825 342.895  1.00  0.00           O  
ATOM   4163  CB  MET X 257     231.273 231.891 342.605  1.00  0.00           C  
ATOM   4164  CG  MET X 257     232.278 231.893 341.441  1.00  0.00           C  
ATOM   4165  SD  MET X 257     231.465 231.343 339.940  1.00  0.00           S  
ATOM   4166  CE  MET X 257     232.854 231.409 338.818  1.00  0.00           C  
ATOM   4167  H   MET X 257     231.482 234.619 342.902  1.00  0.00           H  
ATOM   4168  HA  MET X 257     229.778 232.940 341.330  1.00  0.00           H  
ATOM   4169  HB2 MET X 257     231.773 232.086 343.554  1.00  0.00           H  
ATOM   4170  HB3 MET X 257     230.752 230.937 342.694  1.00  0.00           H  
ATOM   4171  HG2 MET X 257     232.767 232.863 341.345  1.00  0.00           H  
ATOM   4172  HG3 MET X 257     233.105 231.237 341.713  1.00  0.00           H  
ATOM   4173  HE1 MET X 257     233.724 230.925 339.261  1.00  0.00           H  
ATOM   4174  HE2 MET X 257     232.624 231.058 337.812  1.00  0.00           H  
ATOM   4175  HE3 MET X 257     233.179 232.440 338.678  1.00  0.00           H  
ATOM   4176  N   ASN X 258     228.816 233.098 344.520  1.00  0.00           N  
ATOM   4177  CA  ASN X 258     227.710 232.786 345.454  1.00  0.00           C  
ATOM   4178  C   ASN X 258     226.392 233.436 344.945  1.00  0.00           C  
ATOM   4179  O   ASN X 258     225.347 232.826 345.099  1.00  0.00           O  
ATOM   4180  CB  ASN X 258     228.109 233.069 346.914  1.00  0.00           C  
ATOM   4181  CG  ASN X 258     229.412 232.439 347.430  1.00  0.00           C  
ATOM   4182  ND2 ASN X 258     230.475 233.199 347.438  1.00  0.00           N  
ATOM   4183  OD1 ASN X 258     229.536 231.318 348.003  1.00  0.00           O  
ATOM   4184  H   ASN X 258     229.377 233.839 344.914  1.00  0.00           H  
ATOM   4185  HA  ASN X 258     227.537 231.717 345.324  1.00  0.00           H  
ATOM   4186  HB2 ASN X 258     228.161 234.157 346.963  1.00  0.00           H  
ATOM   4187  HB3 ASN X 258     227.253 232.884 347.563  1.00  0.00           H  
ATOM   4188 HD21 ASN X 258     230.504 234.189 347.236  1.00  0.00           H  
ATOM   4189 HD22 ASN X 258     231.319 232.795 347.818  1.00  0.00           H  
ATOM   4190  N   ASN X 259     226.407 234.564 344.207  1.00  0.00           N  
ATOM   4191  CA  ASN X 259     225.268 235.430 343.932  1.00  0.00           C  
ATOM   4192  C   ASN X 259     225.208 235.961 342.523  1.00  0.00           C  
ATOM   4193  O   ASN X 259     225.567 237.139 342.350  1.00  0.00           O  
ATOM   4194  CB  ASN X 259     225.136 236.483 345.074  1.00  0.00           C  
ATOM   4195  CG  ASN X 259     225.080 235.864 346.392  1.00  0.00           C  
ATOM   4196  ND2 ASN X 259     226.129 235.890 347.173  1.00  0.00           N  
ATOM   4197  OD1 ASN X 259     224.145 235.228 346.750  1.00  0.00           O  
ATOM   4198  H   ASN X 259     227.247 234.740 343.675  1.00  0.00           H  
ATOM   4199  HA  ASN X 259     224.368 234.822 344.019  1.00  0.00           H  
ATOM   4200  HB2 ASN X 259     225.961 237.193 345.016  1.00  0.00           H  
ATOM   4201  HB3 ASN X 259     224.140 236.896 344.914  1.00  0.00           H  
ATOM   4202 HD21 ASN X 259     226.990 236.314 346.860  1.00  0.00           H  
ATOM   4203 HD22 ASN X 259     226.098 235.529 348.115  1.00  0.00           H  
ATOM   4204  N   PRO X 260     224.922 235.157 341.518  1.00  0.00           N  
ATOM   4205  CA  PRO X 260     224.968 235.720 340.118  1.00  0.00           C  
ATOM   4206  C   PRO X 260     223.735 236.657 339.932  1.00  0.00           C  
ATOM   4207  O   PRO X 260     222.691 236.512 340.599  1.00  0.00           O  
ATOM   4208  CB  PRO X 260     224.923 234.468 339.291  1.00  0.00           C  
ATOM   4209  CG  PRO X 260     224.582 233.339 340.221  1.00  0.00           C  
ATOM   4210  CD  PRO X 260     225.088 233.767 341.546  1.00  0.00           C  
ATOM   4211  HA  PRO X 260     225.852 236.338 339.963  1.00  0.00           H  
ATOM   4212  HB2 PRO X 260     224.227 234.529 338.454  1.00  0.00           H  
ATOM   4213  HB3 PRO X 260     225.924 234.328 338.883  1.00  0.00           H  
ATOM   4214  HG2 PRO X 260     223.503 233.197 340.281  1.00  0.00           H  
ATOM   4215  HG3 PRO X 260     225.041 232.443 339.802  1.00  0.00           H  
ATOM   4216  HD2 PRO X 260     224.610 233.276 342.395  1.00  0.00           H  
ATOM   4217  HD3 PRO X 260     226.167 233.644 341.631  1.00  0.00           H  
ATOM   4218  N   GLN X 261     223.877 237.714 339.074  1.00  0.00           N  
ATOM   4219  CA  GLN X 261     223.040 238.847 338.986  1.00  0.00           C  
ATOM   4220  C   GLN X 261     222.444 239.009 337.594  1.00  0.00           C  
ATOM   4221  O   GLN X 261     221.699 239.965 337.319  1.00  0.00           O  
ATOM   4222  CB  GLN X 261     223.717 240.179 339.399  1.00  0.00           C  
ATOM   4223  CG  GLN X 261     224.095 240.113 340.858  1.00  0.00           C  
ATOM   4224  CD  GLN X 261     222.997 239.721 341.859  1.00  0.00           C  
ATOM   4225  NE2 GLN X 261     223.374 238.980 342.869  1.00  0.00           N  
ATOM   4226  OE1 GLN X 261     221.930 240.362 342.059  1.00  0.00           O  
ATOM   4227  H   GLN X 261     224.735 237.850 338.558  1.00  0.00           H  
ATOM   4228  HA  GLN X 261     222.185 238.609 339.617  1.00  0.00           H  
ATOM   4229  HB2 GLN X 261     224.589 240.433 338.797  1.00  0.00           H  
ATOM   4230  HB3 GLN X 261     222.983 240.964 339.215  1.00  0.00           H  
ATOM   4231  HG2 GLN X 261     224.881 239.363 340.953  1.00  0.00           H  
ATOM   4232  HG3 GLN X 261     224.537 241.070 341.133  1.00  0.00           H  
ATOM   4233 HE21 GLN X 261     222.617 238.713 343.482  1.00  0.00           H  
ATOM   4234 HE22 GLN X 261     224.248 238.489 342.746  1.00  0.00           H  
ATOM   4235  N   ASH X 262     222.872 238.271 336.587  1.00  0.00           N  
ATOM   4236  CA  ASH X 262     222.639 238.454 335.147  1.00  0.00           C  
ATOM   4237  C   ASH X 262     222.980 237.146 334.483  1.00  0.00           C  
ATOM   4238  O   ASH X 262     223.375 236.156 335.147  1.00  0.00           O  
ATOM   4239  CB  ASH X 262     223.260 239.740 334.520  1.00  0.00           C  
ATOM   4240  CG  ASH X 262     224.702 239.992 334.950  1.00  0.00           C  
ATOM   4241  OD1 ASH X 262     225.206 241.091 335.274  1.00  0.00           O  
ATOM   4242  OD2 ASH X 262     225.524 238.909 334.854  1.00  0.00           O  
ATOM   4243  H   ASH X 262     223.379 237.430 336.825  1.00  0.00           H  
ATOM   4244  HA  ASH X 262     221.577 238.425 334.901  1.00  0.00           H  
ATOM   4245  HB2 ASH X 262     223.242 239.630 333.436  1.00  0.00           H  
ATOM   4246  HB3 ASH X 262     222.692 240.569 334.944  1.00  0.00           H  
ATOM   4247  HD2 ASH X 262     226.387 239.042 335.250  1.00  0.00           H  
ATOM   4248  N   PHE X 263     222.810 237.110 333.171  1.00  0.00           N  
ATOM   4249  CA  PHE X 263     223.102 236.039 332.304  1.00  0.00           C  
ATOM   4250  C   PHE X 263     224.639 235.720 332.256  1.00  0.00           C  
ATOM   4251  O   PHE X 263     225.063 234.546 332.349  1.00  0.00           O  
ATOM   4252  CB  PHE X 263     222.705 236.504 330.921  1.00  0.00           C  
ATOM   4253  CG  PHE X 263     222.648 235.360 329.915  1.00  0.00           C  
ATOM   4254  CD1 PHE X 263     221.543 234.535 329.897  1.00  0.00           C  
ATOM   4255  CD2 PHE X 263     223.771 235.069 329.090  1.00  0.00           C  
ATOM   4256  CE1 PHE X 263     221.430 233.538 328.943  1.00  0.00           C  
ATOM   4257  CE2 PHE X 263     223.635 234.060 328.129  1.00  0.00           C  
ATOM   4258  CZ  PHE X 263     222.478 233.282 328.101  1.00  0.00           C  
ATOM   4259  H   PHE X 263     222.418 237.959 332.788  1.00  0.00           H  
ATOM   4260  HA  PHE X 263     222.495 235.175 332.575  1.00  0.00           H  
ATOM   4261  HB2 PHE X 263     221.723 236.949 331.082  1.00  0.00           H  
ATOM   4262  HB3 PHE X 263     223.463 237.190 330.543  1.00  0.00           H  
ATOM   4263  HD1 PHE X 263     220.770 234.641 330.643  1.00  0.00           H  
ATOM   4264  HD2 PHE X 263     224.671 235.658 329.184  1.00  0.00           H  
ATOM   4265  HE1 PHE X 263     220.553 232.908 328.916  1.00  0.00           H  
ATOM   4266  HE2 PHE X 263     224.532 233.793 327.590  1.00  0.00           H  
ATOM   4267  HZ  PHE X 263     222.403 232.524 327.335  1.00  0.00           H  
ATOM   4268  N   ILE X 264     225.476 236.729 332.204  1.00  0.00           N  
ATOM   4269  CA  ILE X 264     226.896 236.499 332.076  1.00  0.00           C  
ATOM   4270  C   ILE X 264     227.503 235.847 333.367  1.00  0.00           C  
ATOM   4271  O   ILE X 264     228.279 234.879 333.227  1.00  0.00           O  
ATOM   4272  CB  ILE X 264     227.683 237.788 331.818  1.00  0.00           C  
ATOM   4273  CG1 ILE X 264     227.438 238.183 330.350  1.00  0.00           C  
ATOM   4274  CG2 ILE X 264     229.162 237.667 332.126  1.00  0.00           C  
ATOM   4275  CD1 ILE X 264     227.821 239.606 330.051  1.00  0.00           C  
ATOM   4276  H   ILE X 264     225.104 237.666 332.141  1.00  0.00           H  
ATOM   4277  HA  ILE X 264     227.143 235.757 331.317  1.00  0.00           H  
ATOM   4278  HB  ILE X 264     227.215 238.587 332.393  1.00  0.00           H  
ATOM   4279 HG12 ILE X 264     227.964 237.465 329.720  1.00  0.00           H  
ATOM   4280 HG13 ILE X 264     226.366 238.102 330.168  1.00  0.00           H  
ATOM   4281 HG21 ILE X 264     229.369 237.599 333.194  1.00  0.00           H  
ATOM   4282 HG22 ILE X 264     229.804 238.446 331.716  1.00  0.00           H  
ATOM   4283 HG23 ILE X 264     229.522 236.757 331.647  1.00  0.00           H  
ATOM   4284 HD11 ILE X 264     227.571 240.159 330.956  1.00  0.00           H  
ATOM   4285 HD12 ILE X 264     227.344 240.063 329.184  1.00  0.00           H  
ATOM   4286 HD13 ILE X 264     228.878 239.617 329.786  1.00  0.00           H  
ATOM   4287  N   ASP X 265     227.081 236.320 334.564  1.00  0.00           N  
ATOM   4288  CA  ASP X 265     227.480 235.656 335.885  1.00  0.00           C  
ATOM   4289  C   ASP X 265     227.132 234.128 335.776  1.00  0.00           C  
ATOM   4290  O   ASP X 265     227.995 233.216 336.026  1.00  0.00           O  
ATOM   4291  CB  ASP X 265     226.665 236.320 337.069  1.00  0.00           C  
ATOM   4292  CG  ASP X 265     226.891 237.825 337.288  1.00  0.00           C  
ATOM   4293  OD1 ASP X 265     227.527 238.518 336.467  1.00  0.00           O  
ATOM   4294  OD2 ASP X 265     226.476 238.417 338.294  1.00  0.00           O1-
ATOM   4295  H   ASP X 265     226.389 237.050 334.480  1.00  0.00           H  
ATOM   4296  HA  ASP X 265     228.550 235.843 335.974  1.00  0.00           H  
ATOM   4297  HB2 ASP X 265     225.597 236.128 336.967  1.00  0.00           H  
ATOM   4298  HB3 ASP X 265     227.014 235.767 337.940  1.00  0.00           H  
ATOM   4299  N   CYS X 266     225.964 233.806 335.275  1.00  0.00           N  
ATOM   4300  CA  CYS X 266     225.442 232.446 335.115  1.00  0.00           C  
ATOM   4301  C   CYS X 266     226.280 231.625 334.123  1.00  0.00           C  
ATOM   4302  O   CYS X 266     226.410 230.451 334.299  1.00  0.00           O  
ATOM   4303  CB  CYS X 266     223.906 232.554 334.695  1.00  0.00           C  
ATOM   4304  SG  CYS X 266     222.977 233.177 336.110  1.00  0.00           S  
ATOM   4305  H   CYS X 266     225.386 234.571 334.959  1.00  0.00           H  
ATOM   4306  HA  CYS X 266     225.454 231.902 336.059  1.00  0.00           H  
ATOM   4307  HB2 CYS X 266     223.803 233.246 333.860  1.00  0.00           H  
ATOM   4308  HB3 CYS X 266     223.374 231.655 334.386  1.00  0.00           H  
ATOM   4309  HG  CYS X 266     222.885 234.462 335.756  1.00  0.00           H  
ATOM   4310  N   PHE X 267     226.831 232.299 333.139  1.00  0.00           N  
ATOM   4311  CA  PHE X 267     227.594 231.586 332.069  1.00  0.00           C  
ATOM   4312  C   PHE X 267     229.034 231.370 332.460  1.00  0.00           C  
ATOM   4313  O   PHE X 267     229.557 230.310 332.305  1.00  0.00           O  
ATOM   4314  CB  PHE X 267     227.467 232.274 330.700  1.00  0.00           C  
ATOM   4315  CG  PHE X 267     227.513 231.281 329.530  1.00  0.00           C  
ATOM   4316  CD1 PHE X 267     228.715 230.692 329.176  1.00  0.00           C  
ATOM   4317  CD2 PHE X 267     226.417 231.088 328.692  1.00  0.00           C  
ATOM   4318  CE1 PHE X 267     228.769 229.928 328.019  1.00  0.00           C  
ATOM   4319  CE2 PHE X 267     226.486 230.375 327.511  1.00  0.00           C  
ATOM   4320  CZ  PHE X 267     227.685 229.825 327.185  1.00  0.00           C  
ATOM   4321  H   PHE X 267     226.646 233.291 333.118  1.00  0.00           H  
ATOM   4322  HA  PHE X 267     227.137 230.621 331.851  1.00  0.00           H  
ATOM   4323  HB2 PHE X 267     226.529 232.826 330.771  1.00  0.00           H  
ATOM   4324  HB3 PHE X 267     228.261 233.021 330.702  1.00  0.00           H  
ATOM   4325  HD1 PHE X 267     229.567 230.703 329.840  1.00  0.00           H  
ATOM   4326  HD2 PHE X 267     225.499 231.598 328.948  1.00  0.00           H  
ATOM   4327  HE1 PHE X 267     229.728 229.548 327.700  1.00  0.00           H  
ATOM   4328  HE2 PHE X 267     225.652 230.362 326.824  1.00  0.00           H  
ATOM   4329  HZ  PHE X 267     227.838 229.314 326.246  1.00  0.00           H  
ATOM   4330  N   LEU X 268     229.680 232.395 333.088  1.00  0.00           N  
ATOM   4331  CA  LEU X 268     230.988 232.201 333.805  1.00  0.00           C  
ATOM   4332  C   LEU X 268     231.014 231.039 334.803  1.00  0.00           C  
ATOM   4333  O   LEU X 268     231.951 230.265 334.878  1.00  0.00           O  
ATOM   4334  CB  LEU X 268     231.397 233.542 334.503  1.00  0.00           C  
ATOM   4335  CG  LEU X 268     231.633 234.640 333.375  1.00  0.00           C  
ATOM   4336  CD1 LEU X 268     231.774 236.044 334.046  1.00  0.00           C  
ATOM   4337  CD2 LEU X 268     232.935 234.349 332.624  1.00  0.00           C  
ATOM   4338  H   LEU X 268     229.253 233.301 332.965  1.00  0.00           H  
ATOM   4339  HA  LEU X 268     231.747 231.997 333.049  1.00  0.00           H  
ATOM   4340  HB2 LEU X 268     230.539 233.867 335.093  1.00  0.00           H  
ATOM   4341  HB3 LEU X 268     232.307 233.436 335.093  1.00  0.00           H  
ATOM   4342  HG  LEU X 268     230.862 234.734 332.610  1.00  0.00           H  
ATOM   4343 HD11 LEU X 268     232.538 236.014 334.823  1.00  0.00           H  
ATOM   4344 HD12 LEU X 268     230.860 236.372 334.541  1.00  0.00           H  
ATOM   4345 HD13 LEU X 268     231.948 236.823 333.304  1.00  0.00           H  
ATOM   4346 HD21 LEU X 268     232.861 233.556 331.880  1.00  0.00           H  
ATOM   4347 HD22 LEU X 268     233.182 235.184 331.969  1.00  0.00           H  
ATOM   4348 HD23 LEU X 268     233.724 234.032 333.307  1.00  0.00           H  
ATOM   4349  N   MET X 269     229.970 231.052 335.585  1.00  0.00           N  
ATOM   4350  CA  MET X 269     229.767 230.054 336.669  1.00  0.00           C  
ATOM   4351  C   MET X 269     229.375 228.652 336.125  1.00  0.00           C  
ATOM   4352  O   MET X 269     230.041 227.686 336.539  1.00  0.00           O  
ATOM   4353  CB  MET X 269     228.637 230.493 337.661  1.00  0.00           C  
ATOM   4354  CG  MET X 269     228.106 229.455 338.801  1.00  0.00           C  
ATOM   4355  SD  MET X 269     226.711 229.945 339.789  1.00  0.00           S  
ATOM   4356  CE  MET X 269     225.410 229.614 338.529  1.00  0.00           C  
ATOM   4357  H   MET X 269     229.278 231.758 335.376  1.00  0.00           H  
ATOM   4358  HA  MET X 269     230.627 229.867 337.312  1.00  0.00           H  
ATOM   4359  HB2 MET X 269     228.735 231.497 338.074  1.00  0.00           H  
ATOM   4360  HB3 MET X 269     227.782 230.764 337.042  1.00  0.00           H  
ATOM   4361  HG2 MET X 269     227.943 228.518 338.268  1.00  0.00           H  
ATOM   4362  HG3 MET X 269     228.925 229.360 339.514  1.00  0.00           H  
ATOM   4363  HE1 MET X 269     225.274 228.533 338.478  1.00  0.00           H  
ATOM   4364  HE2 MET X 269     224.485 230.089 338.858  1.00  0.00           H  
ATOM   4365  HE3 MET X 269     225.591 230.020 337.534  1.00  0.00           H  
ATOM   4366  N   LYS X 270     228.495 228.591 335.079  1.00  0.00           N  
ATOM   4367  CA  LYS X 270     228.340 227.354 334.318  1.00  0.00           C  
ATOM   4368  C   LYS X 270     229.729 226.918 333.730  1.00  0.00           C  
ATOM   4369  O   LYS X 270     230.023 225.738 333.810  1.00  0.00           O  
ATOM   4370  CB  LYS X 270     227.308 227.569 333.167  1.00  0.00           C  
ATOM   4371  CG  LYS X 270     227.129 226.337 332.251  1.00  0.00           C  
ATOM   4372  CD  LYS X 270     226.627 225.048 332.788  1.00  0.00           C  
ATOM   4373  CE  LYS X 270     226.601 223.923 331.772  1.00  0.00           C  
ATOM   4374  NZ  LYS X 270     226.358 222.544 332.334  1.00  0.00           N1+
ATOM   4375  H   LYS X 270     227.973 229.400 334.772  1.00  0.00           H  
ATOM   4376  HA  LYS X 270     227.983 226.514 334.914  1.00  0.00           H  
ATOM   4377  HB2 LYS X 270     226.315 227.804 333.552  1.00  0.00           H  
ATOM   4378  HB3 LYS X 270     227.703 228.398 332.579  1.00  0.00           H  
ATOM   4379  HG2 LYS X 270     226.362 226.695 331.564  1.00  0.00           H  
ATOM   4380  HG3 LYS X 270     228.077 226.142 331.751  1.00  0.00           H  
ATOM   4381  HD2 LYS X 270     227.323 224.781 333.583  1.00  0.00           H  
ATOM   4382  HD3 LYS X 270     225.643 225.171 333.241  1.00  0.00           H  
ATOM   4383  HE2 LYS X 270     225.763 224.158 331.116  1.00  0.00           H  
ATOM   4384  HE3 LYS X 270     227.495 223.927 331.148  1.00  0.00           H  
ATOM   4385  HZ1 LYS X 270     225.482 222.271 331.911  1.00  0.00           H  
ATOM   4386  HZ2 LYS X 270     226.351 222.603 333.342  1.00  0.00           H  
ATOM   4387  HZ3 LYS X 270     227.123 221.955 332.037  1.00  0.00           H  
ATOM   4388  N   MET X 271     230.575 227.788 333.112  1.00  0.00           N  
ATOM   4389  CA  MET X 271     231.910 227.360 332.651  1.00  0.00           C  
ATOM   4390  C   MET X 271     232.839 226.846 333.783  1.00  0.00           C  
ATOM   4391  O   MET X 271     233.591 225.944 333.560  1.00  0.00           O  
ATOM   4392  CB  MET X 271     232.581 228.369 331.727  1.00  0.00           C  
ATOM   4393  CG  MET X 271     231.843 228.777 330.475  1.00  0.00           C  
ATOM   4394  SD  MET X 271     232.936 229.842 329.447  1.00  0.00           S  
ATOM   4395  CE  MET X 271     232.956 231.408 330.429  1.00  0.00           C  
ATOM   4396  H   MET X 271     230.390 228.775 333.002  1.00  0.00           H  
ATOM   4397  HA  MET X 271     231.754 226.441 332.086  1.00  0.00           H  
ATOM   4398  HB2 MET X 271     232.866 229.210 332.360  1.00  0.00           H  
ATOM   4399  HB3 MET X 271     233.528 227.861 331.545  1.00  0.00           H  
ATOM   4400  HG2 MET X 271     231.524 227.851 329.997  1.00  0.00           H  
ATOM   4401  HG3 MET X 271     230.939 229.339 330.712  1.00  0.00           H  
ATOM   4402  HE1 MET X 271     233.727 232.158 330.254  1.00  0.00           H  
ATOM   4403  HE2 MET X 271     232.003 231.897 330.225  1.00  0.00           H  
ATOM   4404  HE3 MET X 271     233.144 231.103 331.458  1.00  0.00           H  
ATOM   4405  N   GLU X 272     232.676 227.417 334.967  1.00  0.00           N  
ATOM   4406  CA  GLU X 272     233.362 226.794 336.135  1.00  0.00           C  
ATOM   4407  C   GLU X 272     232.877 225.349 336.503  1.00  0.00           C  
ATOM   4408  O   GLU X 272     233.667 224.427 336.794  1.00  0.00           O  
ATOM   4409  CB  GLU X 272     233.253 227.739 337.375  1.00  0.00           C  
ATOM   4410  CG  GLU X 272     234.065 227.348 338.587  1.00  0.00           C  
ATOM   4411  CD  GLU X 272     235.497 227.891 338.393  1.00  0.00           C  
ATOM   4412  OE1 GLU X 272     236.261 227.560 337.448  1.00  0.00           O  
ATOM   4413  OE2 GLU X 272     235.932 228.695 339.220  1.00  0.00           O1-
ATOM   4414  H   GLU X 272     232.315 228.358 335.036  1.00  0.00           H  
ATOM   4415  HA  GLU X 272     234.380 226.760 335.748  1.00  0.00           H  
ATOM   4416  HB2 GLU X 272     233.347 228.770 337.036  1.00  0.00           H  
ATOM   4417  HB3 GLU X 272     232.183 227.714 337.584  1.00  0.00           H  
ATOM   4418  HG2 GLU X 272     233.622 227.706 339.516  1.00  0.00           H  
ATOM   4419  HG3 GLU X 272     234.186 226.265 338.596  1.00  0.00           H  
ATOM   4420  N   LYS X 273     231.555 225.161 336.560  1.00  0.00           N  
ATOM   4421  CA  LYS X 273     230.943 223.813 336.777  1.00  0.00           C  
ATOM   4422  C   LYS X 273     231.333 222.887 335.663  1.00  0.00           C  
ATOM   4423  O   LYS X 273     231.396 221.701 335.987  1.00  0.00           O  
ATOM   4424  CB  LYS X 273     229.431 223.955 336.960  1.00  0.00           C  
ATOM   4425  CG  LYS X 273     229.165 224.453 338.370  1.00  0.00           C  
ATOM   4426  CD  LYS X 273     228.063 225.517 338.374  1.00  0.00           C  
ATOM   4427  CE  LYS X 273     226.709 224.819 337.895  1.00  0.00           C  
ATOM   4428  NZ  LYS X 273     226.203 223.805 338.848  1.00  0.00           N1+
ATOM   4429  H   LYS X 273     230.938 225.960 336.510  1.00  0.00           H  
ATOM   4430  HA  LYS X 273     231.341 223.392 337.701  1.00  0.00           H  
ATOM   4431  HB2 LYS X 273     229.026 224.699 336.273  1.00  0.00           H  
ATOM   4432  HB3 LYS X 273     228.949 222.983 336.855  1.00  0.00           H  
ATOM   4433  HG2 LYS X 273     228.959 223.671 339.101  1.00  0.00           H  
ATOM   4434  HG3 LYS X 273     230.029 224.991 338.760  1.00  0.00           H  
ATOM   4435  HD2 LYS X 273     227.778 225.855 339.371  1.00  0.00           H  
ATOM   4436  HD3 LYS X 273     228.261 226.359 337.710  1.00  0.00           H  
ATOM   4437  HE2 LYS X 273     225.917 225.567 337.847  1.00  0.00           H  
ATOM   4438  HE3 LYS X 273     226.941 224.414 336.909  1.00  0.00           H  
ATOM   4439  HZ1 LYS X 273     226.736 222.959 338.991  1.00  0.00           H  
ATOM   4440  HZ2 LYS X 273     225.337 223.435 338.482  1.00  0.00           H  
ATOM   4441  HZ3 LYS X 273     225.982 224.346 339.671  1.00  0.00           H  
ATOM   4442  N   GLU X 274     231.563 223.343 334.432  1.00  0.00           N  
ATOM   4443  CA  GLU X 274     232.149 222.681 333.254  1.00  0.00           C  
ATOM   4444  C   GLU X 274     233.684 222.711 333.140  1.00  0.00           C  
ATOM   4445  O   GLU X 274     234.303 222.186 332.203  1.00  0.00           O  
ATOM   4446  CB  GLU X 274     231.523 223.331 331.998  1.00  0.00           C  
ATOM   4447  CG  GLU X 274     229.980 223.160 331.827  1.00  0.00           C  
ATOM   4448  CD  GLU X 274     229.623 221.780 331.228  1.00  0.00           C  
ATOM   4449  OE1 GLU X 274     230.118 221.535 330.133  1.00  0.00           O  
ATOM   4450  OE2 GLU X 274     228.753 221.031 331.771  1.00  0.00           O1-
ATOM   4451  H   GLU X 274     231.340 224.319 334.299  1.00  0.00           H  
ATOM   4452  HA  GLU X 274     231.774 221.657 333.264  1.00  0.00           H  
ATOM   4453  HB2 GLU X 274     231.777 224.391 331.983  1.00  0.00           H  
ATOM   4454  HB3 GLU X 274     231.945 222.899 331.091  1.00  0.00           H  
ATOM   4455  HG2 GLU X 274     229.647 223.134 332.865  1.00  0.00           H  
ATOM   4456  HG3 GLU X 274     229.672 223.974 331.171  1.00  0.00           H  
ATOM   4457  N   LYS X 275     234.299 223.188 334.206  1.00  0.00           N  
ATOM   4458  CA  LYS X 275     235.757 223.404 334.490  1.00  0.00           C  
ATOM   4459  C   LYS X 275     236.582 223.995 333.327  1.00  0.00           C  
ATOM   4460  O   LYS X 275     237.776 223.668 333.244  1.00  0.00           O  
ATOM   4461  CB  LYS X 275     236.374 222.089 335.071  1.00  0.00           C  
ATOM   4462  CG  LYS X 275     235.729 221.541 336.354  1.00  0.00           C  
ATOM   4463  CD  LYS X 275     236.249 222.181 337.643  1.00  0.00           C  
ATOM   4464  CE  LYS X 275     237.749 222.169 337.652  1.00  0.00           C  
ATOM   4465  NZ  LYS X 275     238.216 222.594 338.947  1.00  0.00           N1+
ATOM   4466  H   LYS X 275     233.677 223.764 334.755  1.00  0.00           H  
ATOM   4467  HA  LYS X 275     235.840 224.153 335.278  1.00  0.00           H  
ATOM   4468  HB2 LYS X 275     236.344 221.303 334.317  1.00  0.00           H  
ATOM   4469  HB3 LYS X 275     237.435 222.160 335.311  1.00  0.00           H  
ATOM   4470  HG2 LYS X 275     234.641 221.532 336.284  1.00  0.00           H  
ATOM   4471  HG3 LYS X 275     235.985 220.491 336.496  1.00  0.00           H  
ATOM   4472  HD2 LYS X 275     235.894 223.209 337.713  1.00  0.00           H  
ATOM   4473  HD3 LYS X 275     235.893 221.643 338.521  1.00  0.00           H  
ATOM   4474  HE2 LYS X 275     238.146 221.168 337.481  1.00  0.00           H  
ATOM   4475  HE3 LYS X 275     238.049 222.896 336.897  1.00  0.00           H  
ATOM   4476  HZ1 LYS X 275     238.022 221.961 339.710  1.00  0.00           H  
ATOM   4477  HZ2 LYS X 275     237.771 223.478 339.150  1.00  0.00           H  
ATOM   4478  HZ3 LYS X 275     239.203 222.795 339.020  1.00  0.00           H  
ATOM   4479  N   HID X 276     235.912 224.702 332.403  1.00  0.00           N  
ATOM   4480  CA  HID X 276     236.226 225.297 331.149  1.00  0.00           C  
ATOM   4481  C   HID X 276     236.818 224.231 330.173  1.00  0.00           C  
ATOM   4482  O   HID X 276     237.733 224.531 329.377  1.00  0.00           O  
ATOM   4483  CB  HID X 276     237.176 226.424 331.329  1.00  0.00           C  
ATOM   4484  CG  HID X 276     236.681 227.512 332.259  1.00  0.00           C  
ATOM   4485  CD2 HID X 276     236.024 228.686 331.881  1.00  0.00           C  
ATOM   4486  ND1 HID X 276     236.797 227.555 333.597  1.00  0.00           N  
ATOM   4487  CE1 HID X 276     236.024 228.594 334.082  1.00  0.00           C  
ATOM   4488  NE2 HID X 276     235.677 229.383 333.013  1.00  0.00           N  
ATOM   4489  H   HID X 276     235.026 225.009 332.778  1.00  0.00           H  
ATOM   4490  HA  HID X 276     235.299 225.741 330.786  1.00  0.00           H  
ATOM   4491  HB2 HID X 276     238.106 226.012 331.721  1.00  0.00           H  
ATOM   4492  HB3 HID X 276     237.386 226.823 330.336  1.00  0.00           H  
ATOM   4493  HD1 HID X 276     237.264 226.875 334.181  1.00  0.00           H  
ATOM   4494  HD2 HID X 276     235.878 229.057 330.877  1.00  0.00           H  
ATOM   4495  HE1 HID X 276     235.814 228.899 335.097  1.00  0.00           H  
ATOM   4496  N   ASN X 277     236.461 222.977 330.318  1.00  0.00           N  
ATOM   4497  CA  ASN X 277     237.293 221.795 329.984  1.00  0.00           C  
ATOM   4498  C   ASN X 277     236.506 221.028 328.899  1.00  0.00           C  
ATOM   4499  O   ASN X 277     235.437 220.440 329.099  1.00  0.00           O  
ATOM   4500  CB  ASN X 277     237.415 220.940 331.318  1.00  0.00           C  
ATOM   4501  CG  ASN X 277     238.153 219.643 331.069  1.00  0.00           C  
ATOM   4502  ND2 ASN X 277     237.618 218.526 331.536  1.00  0.00           N  
ATOM   4503  OD1 ASN X 277     239.221 219.613 330.460  1.00  0.00           O  
ATOM   4504  H   ASN X 277     235.605 222.821 330.830  1.00  0.00           H  
ATOM   4505  HA  ASN X 277     238.296 221.935 329.579  1.00  0.00           H  
ATOM   4506  HB2 ASN X 277     237.999 221.537 332.019  1.00  0.00           H  
ATOM   4507  HB3 ASN X 277     236.424 220.656 331.671  1.00  0.00           H  
ATOM   4508 HD21 ASN X 277     236.632 218.545 331.757  1.00  0.00           H  
ATOM   4509 HD22 ASN X 277     238.188 217.693 331.553  1.00  0.00           H  
ATOM   4510  N   GLN X 278     237.101 221.025 327.738  1.00  0.00           N  
ATOM   4511  CA  GLN X 278     236.664 220.146 326.577  1.00  0.00           C  
ATOM   4512  C   GLN X 278     236.715 218.633 326.852  1.00  0.00           C  
ATOM   4513  O   GLN X 278     237.593 218.139 327.488  1.00  0.00           O  
ATOM   4514  CB  GLN X 278     237.425 220.609 325.341  1.00  0.00           C  
ATOM   4515  CG  GLN X 278     237.007 222.085 324.853  1.00  0.00           C  
ATOM   4516  CD  GLN X 278     235.492 222.277 324.656  1.00  0.00           C  
ATOM   4517  NE2 GLN X 278     234.798 223.251 325.289  1.00  0.00           N  
ATOM   4518  OE1 GLN X 278     234.890 221.529 323.851  1.00  0.00           O  
ATOM   4519  H   GLN X 278     237.975 221.528 327.687  1.00  0.00           H  
ATOM   4520  HA  GLN X 278     235.637 220.497 326.471  1.00  0.00           H  
ATOM   4521  HB2 GLN X 278     238.498 220.456 325.462  1.00  0.00           H  
ATOM   4522  HB3 GLN X 278     236.998 219.972 324.566  1.00  0.00           H  
ATOM   4523  HG2 GLN X 278     237.291 222.756 325.663  1.00  0.00           H  
ATOM   4524  HG3 GLN X 278     237.574 222.443 323.994  1.00  0.00           H  
ATOM   4525 HE21 GLN X 278     233.790 223.209 325.248  1.00  0.00           H  
ATOM   4526 HE22 GLN X 278     235.171 223.851 326.011  1.00  0.00           H  
ATOM   4527  N   PRO X 279     235.761 217.831 326.384  1.00  0.00           N  
ATOM   4528  CA  PRO X 279     234.535 218.283 325.706  1.00  0.00           C  
ATOM   4529  C   PRO X 279     233.462 219.092 326.443  1.00  0.00           C  
ATOM   4530  O   PRO X 279     233.023 218.821 327.570  1.00  0.00           O  
ATOM   4531  CB  PRO X 279     234.050 216.971 325.009  1.00  0.00           C  
ATOM   4532  CG  PRO X 279     235.241 216.009 324.922  1.00  0.00           C  
ATOM   4533  CD  PRO X 279     236.084 216.412 326.114  1.00  0.00           C  
ATOM   4534  HA  PRO X 279     234.923 218.941 324.928  1.00  0.00           H  
ATOM   4535  HB2 PRO X 279     233.316 216.417 325.594  1.00  0.00           H  
ATOM   4536  HB3 PRO X 279     233.609 217.196 324.038  1.00  0.00           H  
ATOM   4537  HG2 PRO X 279     234.930 214.967 325.005  1.00  0.00           H  
ATOM   4538  HG3 PRO X 279     235.761 216.081 323.966  1.00  0.00           H  
ATOM   4539  HD2 PRO X 279     235.954 215.744 326.965  1.00  0.00           H  
ATOM   4540  HD3 PRO X 279     237.122 216.280 325.806  1.00  0.00           H  
ATOM   4541  N   SER X 280     232.906 220.144 325.886  1.00  0.00           N  
ATOM   4542  CA  SER X 280     231.851 220.972 326.427  1.00  0.00           C  
ATOM   4543  C   SER X 280     231.346 222.083 325.556  1.00  0.00           C  
ATOM   4544  O   SER X 280     232.121 222.764 324.917  1.00  0.00           O  
ATOM   4545  CB  SER X 280     232.451 221.566 327.770  1.00  0.00           C  
ATOM   4546  OG  SER X 280     231.498 222.537 328.334  1.00  0.00           O  
ATOM   4547  H   SER X 280     233.249 220.371 324.964  1.00  0.00           H  
ATOM   4548  HA  SER X 280     230.972 220.389 326.704  1.00  0.00           H  
ATOM   4549  HB2 SER X 280     232.480 220.830 328.574  1.00  0.00           H  
ATOM   4550  HB3 SER X 280     233.391 222.080 327.570  1.00  0.00           H  
ATOM   4551  HG  SER X 280     231.030 222.129 329.066  1.00  0.00           H  
ATOM   4552  N   GLU X 281     230.046 222.230 325.526  1.00  0.00           N  
ATOM   4553  CA  GLU X 281     229.326 223.248 324.755  1.00  0.00           C  
ATOM   4554  C   GLU X 281     229.595 224.703 325.337  1.00  0.00           C  
ATOM   4555  O   GLU X 281     229.660 225.640 324.529  1.00  0.00           O  
ATOM   4556  CB  GLU X 281     227.809 222.864 324.852  1.00  0.00           C  
ATOM   4557  CG  GLU X 281     227.426 221.522 324.136  1.00  0.00           C  
ATOM   4558  CD  GLU X 281     228.200 220.364 324.703  1.00  0.00           C  
ATOM   4559  OE1 GLU X 281     228.224 220.047 325.931  1.00  0.00           O  
ATOM   4560  OE2 GLU X 281     228.974 219.726 323.896  1.00  0.00           O1-
ATOM   4561  H   GLU X 281     229.618 221.457 326.014  1.00  0.00           H  
ATOM   4562  HA  GLU X 281     229.583 223.093 323.707  1.00  0.00           H  
ATOM   4563  HB2 GLU X 281     227.481 222.980 325.884  1.00  0.00           H  
ATOM   4564  HB3 GLU X 281     227.275 223.685 324.373  1.00  0.00           H  
ATOM   4565  HG2 GLU X 281     226.367 221.353 324.331  1.00  0.00           H  
ATOM   4566  HG3 GLU X 281     227.566 221.566 323.056  1.00  0.00           H  
ATOM   4567  N   PHE X 282     229.788 224.829 326.673  1.00  0.00           N  
ATOM   4568  CA  PHE X 282     229.881 226.156 327.228  1.00  0.00           C  
ATOM   4569  C   PHE X 282     231.286 226.673 327.089  1.00  0.00           C  
ATOM   4570  O   PHE X 282     232.183 226.190 327.797  1.00  0.00           O  
ATOM   4571  CB  PHE X 282     229.439 226.103 328.638  1.00  0.00           C  
ATOM   4572  CG  PHE X 282     228.011 225.821 328.748  1.00  0.00           C  
ATOM   4573  CD1 PHE X 282     227.160 226.894 328.879  1.00  0.00           C  
ATOM   4574  CD2 PHE X 282     227.400 224.558 328.589  1.00  0.00           C  
ATOM   4575  CE1 PHE X 282     225.727 226.770 328.993  1.00  0.00           C  
ATOM   4576  CE2 PHE X 282     225.921 224.376 328.596  1.00  0.00           C  
ATOM   4577  CZ  PHE X 282     225.076 225.505 328.828  1.00  0.00           C  
ATOM   4578  H   PHE X 282     229.779 223.996 327.244  1.00  0.00           H  
ATOM   4579  HA  PHE X 282     229.259 226.897 326.727  1.00  0.00           H  
ATOM   4580  HB2 PHE X 282     229.892 225.269 329.175  1.00  0.00           H  
ATOM   4581  HB3 PHE X 282     229.660 227.005 329.209  1.00  0.00           H  
ATOM   4582  HD1 PHE X 282     227.605 227.872 328.991  1.00  0.00           H  
ATOM   4583  HD2 PHE X 282     228.010 223.666 328.575  1.00  0.00           H  
ATOM   4584  HE1 PHE X 282     225.165 227.651 329.267  1.00  0.00           H  
ATOM   4585  HE2 PHE X 282     225.568 223.363 328.472  1.00  0.00           H  
ATOM   4586  HZ  PHE X 282     224.017 225.399 329.008  1.00  0.00           H  
ATOM   4587  N   THR X 283     231.505 227.725 326.303  1.00  0.00           N  
ATOM   4588  CA  THR X 283     232.851 228.352 326.093  1.00  0.00           C  
ATOM   4589  C   THR X 283     232.737 229.845 325.960  1.00  0.00           C  
ATOM   4590  O   THR X 283     231.634 230.345 325.845  1.00  0.00           O  
ATOM   4591  CB  THR X 283     233.611 227.815 324.875  1.00  0.00           C  
ATOM   4592  CG2 THR X 283     233.658 226.306 324.739  1.00  0.00           C  
ATOM   4593  OG1 THR X 283     232.971 228.318 323.716  1.00  0.00           O  
ATOM   4594  H   THR X 283     230.719 228.061 325.764  1.00  0.00           H  
ATOM   4595  HA  THR X 283     233.524 228.164 326.929  1.00  0.00           H  
ATOM   4596  HB  THR X 283     234.636 228.186 324.859  1.00  0.00           H  
ATOM   4597  HG1 THR X 283     233.734 228.653 323.240  1.00  0.00           H  
ATOM   4598 HG21 THR X 283     233.928 225.843 325.688  1.00  0.00           H  
ATOM   4599 HG22 THR X 283     234.396 226.007 323.995  1.00  0.00           H  
ATOM   4600 HG23 THR X 283     232.713 225.924 324.353  1.00  0.00           H  
ATOM   4601  N   ILE X 284     233.835 230.602 325.997  1.00  0.00           N  
ATOM   4602  CA  ILE X 284     233.834 232.060 325.857  1.00  0.00           C  
ATOM   4603  C   ILE X 284     233.349 232.523 324.396  1.00  0.00           C  
ATOM   4604  O   ILE X 284     232.679 233.511 324.283  1.00  0.00           O  
ATOM   4605  CB  ILE X 284     235.205 232.665 326.238  1.00  0.00           C  
ATOM   4606  CG1 ILE X 284     235.813 232.064 327.598  1.00  0.00           C  
ATOM   4607  CG2 ILE X 284     235.109 234.194 326.159  1.00  0.00           C  
ATOM   4608  CD1 ILE X 284     235.605 233.011 328.794  1.00  0.00           C  
ATOM   4609  H   ILE X 284     234.667 230.073 326.216  1.00  0.00           H  
ATOM   4610  HA  ILE X 284     233.134 232.592 326.502  1.00  0.00           H  
ATOM   4611  HB  ILE X 284     235.926 232.371 325.476  1.00  0.00           H  
ATOM   4612 HG12 ILE X 284     235.372 231.100 327.851  1.00  0.00           H  
ATOM   4613 HG13 ILE X 284     236.880 231.865 327.494  1.00  0.00           H  
ATOM   4614 HG21 ILE X 284     234.146 234.521 326.551  1.00  0.00           H  
ATOM   4615 HG22 ILE X 284     235.189 234.469 325.107  1.00  0.00           H  
ATOM   4616 HG23 ILE X 284     235.939 234.653 326.695  1.00  0.00           H  
ATOM   4617 HD11 ILE X 284     236.392 233.760 328.882  1.00  0.00           H  
ATOM   4618 HD12 ILE X 284     235.698 232.411 329.699  1.00  0.00           H  
ATOM   4619 HD13 ILE X 284     234.597 233.426 328.776  1.00  0.00           H  
ATOM   4620  N   GLU X 285     233.590 231.799 323.228  1.00  0.00           N  
ATOM   4621  CA  GLU X 285     233.051 232.142 321.956  1.00  0.00           C  
ATOM   4622  C   GLU X 285     231.614 231.720 321.752  1.00  0.00           C  
ATOM   4623  O   GLU X 285     231.032 232.235 320.781  1.00  0.00           O  
ATOM   4624  CB  GLU X 285     234.011 231.728 320.764  1.00  0.00           C  
ATOM   4625  CG  GLU X 285     234.391 230.245 320.679  1.00  0.00           C  
ATOM   4626  CD  GLU X 285     235.449 229.868 321.735  1.00  0.00           C  
ATOM   4627  OE1 GLU X 285     235.165 229.430 322.866  1.00  0.00           O  
ATOM   4628  OE2 GLU X 285     236.663 229.819 321.488  1.00  0.00           O1-
ATOM   4629  H   GLU X 285     234.070 230.915 323.310  1.00  0.00           H  
ATOM   4630  HA  GLU X 285     232.936 233.225 321.902  1.00  0.00           H  
ATOM   4631  HB2 GLU X 285     233.536 232.018 319.827  1.00  0.00           H  
ATOM   4632  HB3 GLU X 285     234.907 232.281 321.046  1.00  0.00           H  
ATOM   4633  HG2 GLU X 285     233.442 229.732 320.836  1.00  0.00           H  
ATOM   4634  HG3 GLU X 285     234.747 230.006 319.677  1.00  0.00           H  
ATOM   4635  N   SER X 286     231.055 230.851 322.559  1.00  0.00           N  
ATOM   4636  CA  SER X 286     229.642 230.532 322.623  1.00  0.00           C  
ATOM   4637  C   SER X 286     228.859 231.704 323.279  1.00  0.00           C  
ATOM   4638  O   SER X 286     227.915 232.265 322.732  1.00  0.00           O  
ATOM   4639  CB  SER X 286     229.374 229.241 323.428  1.00  0.00           C  
ATOM   4640  OG  SER X 286     228.018 229.025 323.462  1.00  0.00           O  
ATOM   4641  H   SER X 286     231.693 230.505 323.262  1.00  0.00           H  
ATOM   4642  HA  SER X 286     229.312 230.529 321.584  1.00  0.00           H  
ATOM   4643  HB2 SER X 286     229.875 228.431 322.897  1.00  0.00           H  
ATOM   4644  HB3 SER X 286     229.788 229.357 324.430  1.00  0.00           H  
ATOM   4645  HG  SER X 286     227.552 229.041 322.623  1.00  0.00           H  
ATOM   4646  N   LEU X 287     229.398 232.094 324.434  1.00  0.00           N  
ATOM   4647  CA  LEU X 287     228.805 233.113 325.363  1.00  0.00           C  
ATOM   4648  C   LEU X 287     228.651 234.411 324.591  1.00  0.00           C  
ATOM   4649  O   LEU X 287     227.645 235.092 324.761  1.00  0.00           O  
ATOM   4650  CB  LEU X 287     229.751 233.265 326.545  1.00  0.00           C  
ATOM   4651  CG  LEU X 287     229.453 234.217 327.695  1.00  0.00           C  
ATOM   4652  CD1 LEU X 287     227.957 234.352 328.022  1.00  0.00           C  
ATOM   4653  CD2 LEU X 287     230.261 233.774 328.919  1.00  0.00           C  
ATOM   4654  H   LEU X 287     230.130 231.511 324.813  1.00  0.00           H  
ATOM   4655  HA  LEU X 287     227.817 232.849 325.741  1.00  0.00           H  
ATOM   4656  HB2 LEU X 287     229.953 232.286 326.979  1.00  0.00           H  
ATOM   4657  HB3 LEU X 287     230.689 233.520 326.052  1.00  0.00           H  
ATOM   4658  HG  LEU X 287     229.884 235.178 327.417  1.00  0.00           H  
ATOM   4659 HD11 LEU X 287     227.786 235.103 328.794  1.00  0.00           H  
ATOM   4660 HD12 LEU X 287     227.603 233.360 328.301  1.00  0.00           H  
ATOM   4661 HD13 LEU X 287     227.405 234.856 327.228  1.00  0.00           H  
ATOM   4662 HD21 LEU X 287     230.192 234.537 329.693  1.00  0.00           H  
ATOM   4663 HD22 LEU X 287     229.917 232.827 329.334  1.00  0.00           H  
ATOM   4664 HD23 LEU X 287     231.318 233.742 328.651  1.00  0.00           H  
ATOM   4665  N   GLU X 288     229.697 234.763 323.810  1.00  0.00           N  
ATOM   4666  CA  GLU X 288     229.675 235.989 323.048  1.00  0.00           C  
ATOM   4667  C   GLU X 288     228.554 235.982 321.975  1.00  0.00           C  
ATOM   4668  O   GLU X 288     227.967 236.979 321.725  1.00  0.00           O  
ATOM   4669  CB  GLU X 288     231.042 236.387 322.473  1.00  0.00           C  
ATOM   4670  CG  GLU X 288     231.459 235.623 321.190  1.00  0.00           C  
ATOM   4671  CD  GLU X 288     232.924 235.933 320.718  1.00  0.00           C  
ATOM   4672  OE1 GLU X 288     233.238 235.674 319.558  1.00  0.00           O  
ATOM   4673  OE2 GLU X 288     233.662 236.670 321.394  1.00  0.00           O1-
ATOM   4674  H   GLU X 288     230.520 234.177 323.802  1.00  0.00           H  
ATOM   4675  HA  GLU X 288     229.394 236.836 323.673  1.00  0.00           H  
ATOM   4676  HB2 GLU X 288     230.924 237.437 322.201  1.00  0.00           H  
ATOM   4677  HB3 GLU X 288     231.816 236.262 323.231  1.00  0.00           H  
ATOM   4678  HG2 GLU X 288     231.408 234.561 321.430  1.00  0.00           H  
ATOM   4679  HG3 GLU X 288     230.701 235.818 320.431  1.00  0.00           H  
ATOM   4680  N   ASN X 289     228.325 234.864 321.284  1.00  0.00           N  
ATOM   4681  CA  ASN X 289     227.278 234.752 320.242  1.00  0.00           C  
ATOM   4682  C   ASN X 289     225.891 234.438 320.783  1.00  0.00           C  
ATOM   4683  O   ASN X 289     224.925 234.984 320.355  1.00  0.00           O  
ATOM   4684  CB  ASN X 289     227.777 233.610 319.280  1.00  0.00           C  
ATOM   4685  CG  ASN X 289     228.841 234.133 318.381  1.00  0.00           C  
ATOM   4686  ND2 ASN X 289     230.069 233.692 318.503  1.00  0.00           N  
ATOM   4687  OD1 ASN X 289     228.631 235.045 317.566  1.00  0.00           O  
ATOM   4688  H   ASN X 289     228.875 234.082 321.607  1.00  0.00           H  
ATOM   4689  HA  ASN X 289     227.084 235.716 319.771  1.00  0.00           H  
ATOM   4690  HB2 ASN X 289     228.096 232.769 319.896  1.00  0.00           H  
ATOM   4691  HB3 ASN X 289     226.950 233.261 318.663  1.00  0.00           H  
ATOM   4692 HD21 ASN X 289     230.400 233.068 319.225  1.00  0.00           H  
ATOM   4693 HD22 ASN X 289     230.724 233.748 317.736  1.00  0.00           H  
ATOM   4694  N   THR X 290     225.764 233.646 321.870  1.00  0.00           N  
ATOM   4695  CA  THR X 290     224.491 233.617 322.705  1.00  0.00           C  
ATOM   4696  C   THR X 290     224.109 235.041 323.121  1.00  0.00           C  
ATOM   4697  O   THR X 290     222.979 235.371 323.002  1.00  0.00           O  
ATOM   4698  CB  THR X 290     224.728 232.704 324.054  1.00  0.00           C  
ATOM   4699  CG2 THR X 290     223.393 232.193 324.682  1.00  0.00           C  
ATOM   4700  OG1 THR X 290     225.489 231.555 323.716  1.00  0.00           O  
ATOM   4701  H   THR X 290     226.633 233.212 322.147  1.00  0.00           H  
ATOM   4702  HA  THR X 290     223.673 233.241 322.090  1.00  0.00           H  
ATOM   4703  HB  THR X 290     225.264 233.196 324.865  1.00  0.00           H  
ATOM   4704  HG1 THR X 290     226.398 231.803 323.534  1.00  0.00           H  
ATOM   4705 HG21 THR X 290     222.799 231.775 323.869  1.00  0.00           H  
ATOM   4706 HG22 THR X 290     222.851 233.053 325.075  1.00  0.00           H  
ATOM   4707 HG23 THR X 290     223.700 231.473 325.440  1.00  0.00           H  
ATOM   4708  N   ALA X 291     225.071 235.933 323.463  1.00  0.00           N  
ATOM   4709  CA  ALA X 291     224.746 237.284 323.890  1.00  0.00           C  
ATOM   4710  C   ALA X 291     224.329 238.143 322.744  1.00  0.00           C  
ATOM   4711  O   ALA X 291     223.347 238.927 322.794  1.00  0.00           O  
ATOM   4712  CB  ALA X 291     225.991 237.889 324.534  1.00  0.00           C  
ATOM   4713  H   ALA X 291     226.013 235.570 323.488  1.00  0.00           H  
ATOM   4714  HA  ALA X 291     223.928 237.350 324.607  1.00  0.00           H  
ATOM   4715  HB1 ALA X 291     226.457 237.354 325.361  1.00  0.00           H  
ATOM   4716  HB2 ALA X 291     225.740 238.898 324.861  1.00  0.00           H  
ATOM   4717  HB3 ALA X 291     226.727 238.041 323.744  1.00  0.00           H  
ATOM   4718  N   VAL X 292     224.918 237.931 321.570  1.00  0.00           N  
ATOM   4719  CA  VAL X 292     224.519 238.584 320.327  1.00  0.00           C  
ATOM   4720  C   VAL X 292     223.240 238.069 319.637  1.00  0.00           C  
ATOM   4721  O   VAL X 292     222.465 238.929 319.226  1.00  0.00           O  
ATOM   4722  CB  VAL X 292     225.749 238.605 319.362  1.00  0.00           C  
ATOM   4723  CG1 VAL X 292     225.480 238.913 317.877  1.00  0.00           C  
ATOM   4724  CG2 VAL X 292     226.679 239.684 319.891  1.00  0.00           C  
ATOM   4725  H   VAL X 292     225.729 237.329 321.561  1.00  0.00           H  
ATOM   4726  HA  VAL X 292     224.286 239.631 320.516  1.00  0.00           H  
ATOM   4727  HB  VAL X 292     226.246 237.635 319.389  1.00  0.00           H  
ATOM   4728 HG11 VAL X 292     225.163 239.955 317.842  1.00  0.00           H  
ATOM   4729 HG12 VAL X 292     226.316 238.612 317.245  1.00  0.00           H  
ATOM   4730 HG13 VAL X 292     224.634 238.268 317.640  1.00  0.00           H  
ATOM   4731 HG21 VAL X 292     227.130 239.475 320.861  1.00  0.00           H  
ATOM   4732 HG22 VAL X 292     226.178 240.651 319.927  1.00  0.00           H  
ATOM   4733 HG23 VAL X 292     227.474 239.892 319.175  1.00  0.00           H  
ATOM   4734  N   ASP X 293     222.840 236.831 319.653  1.00  0.00           N  
ATOM   4735  CA  ASP X 293     221.597 236.312 319.225  1.00  0.00           C  
ATOM   4736  C   ASP X 293     220.450 236.842 320.157  1.00  0.00           C  
ATOM   4737  O   ASP X 293     219.356 236.997 319.629  1.00  0.00           O  
ATOM   4738  CB  ASP X 293     221.747 234.811 319.264  1.00  0.00           C  
ATOM   4739  CG  ASP X 293     222.637 234.099 318.260  1.00  0.00           C  
ATOM   4740  OD1 ASP X 293     223.309 234.727 317.437  1.00  0.00           O  
ATOM   4741  OD2 ASP X 293     222.593 232.811 318.217  1.00  0.00           O1-
ATOM   4742  H   ASP X 293     223.508 236.127 319.932  1.00  0.00           H  
ATOM   4743  HA  ASP X 293     221.512 236.654 318.193  1.00  0.00           H  
ATOM   4744  HB2 ASP X 293     222.131 234.516 320.241  1.00  0.00           H  
ATOM   4745  HB3 ASP X 293     220.791 234.377 318.972  1.00  0.00           H  
ATOM   4746  N   LEU X 294     220.690 236.942 321.446  1.00  0.00           N  
ATOM   4747  CA  LEU X 294     219.738 237.258 322.525  1.00  0.00           C  
ATOM   4748  C   LEU X 294     219.415 238.703 322.450  1.00  0.00           C  
ATOM   4749  O   LEU X 294     218.291 239.073 322.748  1.00  0.00           O  
ATOM   4750  CB  LEU X 294     220.213 236.903 324.010  1.00  0.00           C  
ATOM   4751  CG  LEU X 294     220.001 235.450 324.347  1.00  0.00           C  
ATOM   4752  CD1 LEU X 294     220.780 235.028 325.596  1.00  0.00           C  
ATOM   4753  CD2 LEU X 294     218.513 235.269 324.769  1.00  0.00           C  
ATOM   4754  H   LEU X 294     221.637 236.692 321.695  1.00  0.00           H  
ATOM   4755  HA  LEU X 294     218.807 236.711 322.374  1.00  0.00           H  
ATOM   4756  HB2 LEU X 294     221.283 237.109 324.041  1.00  0.00           H  
ATOM   4757  HB3 LEU X 294     219.692 237.602 324.665  1.00  0.00           H  
ATOM   4758  HG  LEU X 294     220.291 234.818 323.508  1.00  0.00           H  
ATOM   4759 HD11 LEU X 294     220.374 235.594 326.435  1.00  0.00           H  
ATOM   4760 HD12 LEU X 294     221.831 235.269 325.434  1.00  0.00           H  
ATOM   4761 HD13 LEU X 294     220.740 233.972 325.864  1.00  0.00           H  
ATOM   4762 HD21 LEU X 294     217.775 235.530 324.010  1.00  0.00           H  
ATOM   4763 HD22 LEU X 294     218.334 234.314 325.262  1.00  0.00           H  
ATOM   4764 HD23 LEU X 294     218.222 236.003 325.520  1.00  0.00           H  
ATOM   4765  N   PHE X 295     220.306 239.591 321.956  1.00  0.00           N  
ATOM   4766  CA  PHE X 295     219.946 240.989 321.573  1.00  0.00           C  
ATOM   4767  C   PHE X 295     219.055 241.015 320.368  1.00  0.00           C  
ATOM   4768  O   PHE X 295     218.026 241.662 320.375  1.00  0.00           O  
ATOM   4769  CB  PHE X 295     221.210 241.847 321.254  1.00  0.00           C  
ATOM   4770  CG  PHE X 295     221.829 242.398 322.561  1.00  0.00           C  
ATOM   4771  CD1 PHE X 295     223.145 241.932 322.886  1.00  0.00           C  
ATOM   4772  CD2 PHE X 295     221.221 243.403 323.300  1.00  0.00           C  
ATOM   4773  CE1 PHE X 295     223.858 242.597 323.949  1.00  0.00           C  
ATOM   4774  CE2 PHE X 295     221.906 243.945 324.416  1.00  0.00           C  
ATOM   4775  CZ  PHE X 295     223.193 243.607 324.689  1.00  0.00           C  
ATOM   4776  H   PHE X 295     221.297 239.395 321.972  1.00  0.00           H  
ATOM   4777  HA  PHE X 295     219.452 241.531 322.379  1.00  0.00           H  
ATOM   4778  HB2 PHE X 295     221.948 241.202 320.777  1.00  0.00           H  
ATOM   4779  HB3 PHE X 295     221.025 242.685 320.582  1.00  0.00           H  
ATOM   4780  HD1 PHE X 295     223.603 241.170 322.274  1.00  0.00           H  
ATOM   4781  HD2 PHE X 295     220.273 243.832 323.010  1.00  0.00           H  
ATOM   4782  HE1 PHE X 295     224.891 242.353 324.150  1.00  0.00           H  
ATOM   4783  HE2 PHE X 295     221.420 244.746 324.953  1.00  0.00           H  
ATOM   4784  HZ  PHE X 295     223.789 244.058 325.469  1.00  0.00           H  
ATOM   4785  N   GLY X 296     219.303 240.219 319.359  1.00  0.00           N  
ATOM   4786  CA  GLY X 296     218.499 240.166 318.139  1.00  0.00           C  
ATOM   4787  C   GLY X 296     217.019 239.671 318.492  1.00  0.00           C  
ATOM   4788  O   GLY X 296     216.078 240.436 318.430  1.00  0.00           O  
ATOM   4789  H   GLY X 296     220.155 239.679 319.389  1.00  0.00           H  
ATOM   4790  HA2 GLY X 296     218.479 241.189 317.763  1.00  0.00           H  
ATOM   4791  HA3 GLY X 296     218.866 239.433 317.421  1.00  0.00           H  
ATOM   4792  N   ALA X 297     216.950 238.349 318.826  1.00  0.00           N  
ATOM   4793  CA  ALA X 297     215.706 237.667 319.181  1.00  0.00           C  
ATOM   4794  C   ALA X 297     214.977 238.398 320.298  1.00  0.00           C  
ATOM   4795  O   ALA X 297     213.739 238.461 320.308  1.00  0.00           O  
ATOM   4796  CB  ALA X 297     216.046 236.203 319.528  1.00  0.00           C  
ATOM   4797  H   ALA X 297     217.768 237.757 318.792  1.00  0.00           H  
ATOM   4798  HA  ALA X 297     215.077 237.613 318.292  1.00  0.00           H  
ATOM   4799  HB1 ALA X 297     216.462 235.672 318.672  1.00  0.00           H  
ATOM   4800  HB2 ALA X 297     215.137 235.681 319.825  1.00  0.00           H  
ATOM   4801  HB3 ALA X 297     216.736 236.185 320.371  1.00  0.00           H  
ATOM   4802  N   GLY X 298     215.695 238.908 321.301  1.00  0.00           N  
ATOM   4803  CA  GLY X 298     215.194 239.576 322.520  1.00  0.00           C  
ATOM   4804  C   GLY X 298     214.614 240.935 322.253  1.00  0.00           C  
ATOM   4805  O   GLY X 298     214.076 241.472 323.186  1.00  0.00           O  
ATOM   4806  H   GLY X 298     216.698 238.846 321.198  1.00  0.00           H  
ATOM   4807  HA2 GLY X 298     214.458 238.969 323.047  1.00  0.00           H  
ATOM   4808  HA3 GLY X 298     216.081 239.637 323.151  1.00  0.00           H  
ATOM   4809  N   THR X 299     214.775 241.595 321.058  1.00  0.00           N  
ATOM   4810  CA  THR X 299     214.346 242.920 320.732  1.00  0.00           C  
ATOM   4811  C   THR X 299     213.190 242.924 319.728  1.00  0.00           C  
ATOM   4812  O   THR X 299     212.117 243.443 320.079  1.00  0.00           O  
ATOM   4813  CB  THR X 299     215.462 243.890 320.190  1.00  0.00           C  
ATOM   4814  CG2 THR X 299     214.890 245.306 320.136  1.00  0.00           C  
ATOM   4815  OG1 THR X 299     216.553 243.949 321.041  1.00  0.00           O  
ATOM   4816  H   THR X 299     215.318 241.116 320.354  1.00  0.00           H  
ATOM   4817  HA  THR X 299     213.966 243.384 321.642  1.00  0.00           H  
ATOM   4818  HB  THR X 299     215.718 243.712 319.145  1.00  0.00           H  
ATOM   4819  HG1 THR X 299     217.127 243.183 320.963  1.00  0.00           H  
ATOM   4820 HG21 THR X 299     215.755 245.935 319.923  1.00  0.00           H  
ATOM   4821 HG22 THR X 299     214.392 245.588 321.063  1.00  0.00           H  
ATOM   4822 HG23 THR X 299     214.336 245.260 319.199  1.00  0.00           H  
ATOM   4823  N   GLU X 300     213.411 242.420 318.494  1.00  0.00           N  
ATOM   4824  CA  GLU X 300     212.563 242.699 317.323  1.00  0.00           C  
ATOM   4825  C   GLU X 300     211.165 242.154 317.409  1.00  0.00           C  
ATOM   4826  O   GLU X 300     210.251 242.911 317.028  1.00  0.00           O  
ATOM   4827  CB  GLU X 300     213.368 242.301 316.012  1.00  0.00           C  
ATOM   4828  CG  GLU X 300     212.559 242.473 314.766  1.00  0.00           C  
ATOM   4829  CD  GLU X 300     212.325 243.888 314.357  1.00  0.00           C  
ATOM   4830  OE1 GLU X 300     212.787 244.838 314.976  1.00  0.00           O  
ATOM   4831  OE2 GLU X 300     211.549 244.060 313.378  1.00  0.00           O1-
ATOM   4832  H   GLU X 300     214.289 241.939 318.358  1.00  0.00           H  
ATOM   4833  HA  GLU X 300     212.485 243.786 317.313  1.00  0.00           H  
ATOM   4834  HB2 GLU X 300     214.222 242.976 315.950  1.00  0.00           H  
ATOM   4835  HB3 GLU X 300     213.714 241.267 316.024  1.00  0.00           H  
ATOM   4836  HG2 GLU X 300     213.073 241.980 313.941  1.00  0.00           H  
ATOM   4837  HG3 GLU X 300     211.649 241.880 314.865  1.00  0.00           H  
ATOM   4838  N   THR X 301     210.965 241.020 318.031  1.00  0.00           N  
ATOM   4839  CA  THR X 301     209.732 240.280 318.040  1.00  0.00           C  
ATOM   4840  C   THR X 301     208.694 240.845 319.015  1.00  0.00           C  
ATOM   4841  O   THR X 301     207.558 240.969 318.628  1.00  0.00           O  
ATOM   4842  CB  THR X 301     209.915 238.724 318.175  1.00  0.00           C  
ATOM   4843  CG2 THR X 301     208.783 238.093 317.391  1.00  0.00           C  
ATOM   4844  OG1 THR X 301     211.168 238.301 317.665  1.00  0.00           O  
ATOM   4845  H   THR X 301     211.732 240.474 318.395  1.00  0.00           H  
ATOM   4846  HA  THR X 301     209.338 240.484 317.045  1.00  0.00           H  
ATOM   4847  HB  THR X 301     209.735 238.499 319.227  1.00  0.00           H  
ATOM   4848  HG1 THR X 301     211.176 238.302 316.705  1.00  0.00           H  
ATOM   4849 HG21 THR X 301     208.980 238.243 316.330  1.00  0.00           H  
ATOM   4850 HG22 THR X 301     207.821 238.540 317.644  1.00  0.00           H  
ATOM   4851 HG23 THR X 301     208.702 237.035 317.640  1.00  0.00           H  
ATOM   4852  N   THR X 302     209.189 241.172 320.210  1.00  0.00           N  
ATOM   4853  CA  THR X 302     208.424 241.983 321.183  1.00  0.00           C  
ATOM   4854  C   THR X 302     208.048 243.384 320.606  1.00  0.00           C  
ATOM   4855  O   THR X 302     206.890 243.864 320.561  1.00  0.00           O  
ATOM   4856  CB  THR X 302     209.203 242.213 322.454  1.00  0.00           C  
ATOM   4857  CG2 THR X 302     208.429 242.922 323.587  1.00  0.00           C  
ATOM   4858  OG1 THR X 302     209.673 241.064 323.015  1.00  0.00           O  
ATOM   4859  H   THR X 302     210.159 240.945 320.377  1.00  0.00           H  
ATOM   4860  HA  THR X 302     207.541 241.427 321.498  1.00  0.00           H  
ATOM   4861  HB  THR X 302     210.134 242.741 322.245  1.00  0.00           H  
ATOM   4862  HG1 THR X 302     210.308 240.770 322.357  1.00  0.00           H  
ATOM   4863 HG21 THR X 302     208.989 243.041 324.515  1.00  0.00           H  
ATOM   4864 HG22 THR X 302     207.632 242.235 323.872  1.00  0.00           H  
ATOM   4865 HG23 THR X 302     208.008 243.875 323.266  1.00  0.00           H  
ATOM   4866  N   SER X 303     209.076 244.066 320.069  1.00  0.00           N  
ATOM   4867  CA  SER X 303     208.932 245.396 319.560  1.00  0.00           C  
ATOM   4868  C   SER X 303     208.030 245.488 318.327  1.00  0.00           C  
ATOM   4869  O   SER X 303     207.242 246.455 318.273  1.00  0.00           O  
ATOM   4870  CB  SER X 303     210.335 245.898 319.358  1.00  0.00           C  
ATOM   4871  OG  SER X 303     210.295 247.152 318.761  1.00  0.00           O  
ATOM   4872  H   SER X 303     209.985 243.639 320.177  1.00  0.00           H  
ATOM   4873  HA  SER X 303     208.556 246.106 320.297  1.00  0.00           H  
ATOM   4874  HB2 SER X 303     210.820 246.043 320.323  1.00  0.00           H  
ATOM   4875  HB3 SER X 303     210.885 245.233 318.691  1.00  0.00           H  
ATOM   4876  HG  SER X 303     210.999 247.153 318.108  1.00  0.00           H  
ATOM   4877  N   THR X 304     208.090 244.421 317.500  1.00  0.00           N  
ATOM   4878  CA  THR X 304     207.078 244.274 316.454  1.00  0.00           C  
ATOM   4879  C   THR X 304     205.714 244.088 317.001  1.00  0.00           C  
ATOM   4880  O   THR X 304     204.845 244.920 316.685  1.00  0.00           O  
ATOM   4881  CB  THR X 304     207.417 243.160 315.491  1.00  0.00           C  
ATOM   4882  CG2 THR X 304     206.339 242.873 314.473  1.00  0.00           C  
ATOM   4883  OG1 THR X 304     208.589 243.463 314.910  1.00  0.00           O  
ATOM   4884  H   THR X 304     208.747 243.694 317.745  1.00  0.00           H  
ATOM   4885  HA  THR X 304     207.090 245.185 315.855  1.00  0.00           H  
ATOM   4886  HB  THR X 304     207.611 242.255 316.067  1.00  0.00           H  
ATOM   4887  HG1 THR X 304     209.138 243.149 315.633  1.00  0.00           H  
ATOM   4888 HG21 THR X 304     205.562 242.186 314.807  1.00  0.00           H  
ATOM   4889 HG22 THR X 304     206.741 242.388 313.584  1.00  0.00           H  
ATOM   4890 HG23 THR X 304     205.871 243.840 314.286  1.00  0.00           H  
ATOM   4891  N   THR X 305     205.502 243.173 317.963  1.00  0.00           N  
ATOM   4892  CA  THR X 305     204.147 242.863 318.480  1.00  0.00           C  
ATOM   4893  C   THR X 305     203.542 244.060 319.328  1.00  0.00           C  
ATOM   4894  O   THR X 305     202.365 244.340 319.146  1.00  0.00           O  
ATOM   4895  CB  THR X 305     204.152 241.557 319.291  1.00  0.00           C  
ATOM   4896  CG2 THR X 305     202.707 240.996 319.593  1.00  0.00           C  
ATOM   4897  OG1 THR X 305     204.727 240.575 318.443  1.00  0.00           O  
ATOM   4898  H   THR X 305     206.234 242.516 318.190  1.00  0.00           H  
ATOM   4899  HA  THR X 305     203.447 242.813 317.647  1.00  0.00           H  
ATOM   4900  HB  THR X 305     204.611 241.722 320.266  1.00  0.00           H  
ATOM   4901  HG1 THR X 305     205.671 240.747 318.480  1.00  0.00           H  
ATOM   4902 HG21 THR X 305     202.120 241.860 319.906  1.00  0.00           H  
ATOM   4903 HG22 THR X 305     202.697 240.180 320.315  1.00  0.00           H  
ATOM   4904 HG23 THR X 305     202.261 240.545 318.706  1.00  0.00           H  
ATOM   4905  N   LEU X 306     204.355 244.790 319.980  1.00  0.00           N  
ATOM   4906  CA  LEU X 306     203.965 246.062 320.710  1.00  0.00           C  
ATOM   4907  C   LEU X 306     203.563 247.170 319.723  1.00  0.00           C  
ATOM   4908  O   LEU X 306     202.452 247.709 319.838  1.00  0.00           O  
ATOM   4909  CB  LEU X 306     205.142 246.566 321.573  1.00  0.00           C  
ATOM   4910  CG  LEU X 306     205.049 247.770 322.488  1.00  0.00           C  
ATOM   4911  CD1 LEU X 306     203.805 247.526 323.385  1.00  0.00           C  
ATOM   4912  CD2 LEU X 306     206.263 247.883 323.377  1.00  0.00           C  
ATOM   4913  H   LEU X 306     205.327 244.516 320.011  1.00  0.00           H  
ATOM   4914  HA  LEU X 306     203.116 245.799 321.341  1.00  0.00           H  
ATOM   4915  HB2 LEU X 306     205.357 245.710 322.213  1.00  0.00           H  
ATOM   4916  HB3 LEU X 306     205.980 246.746 320.899  1.00  0.00           H  
ATOM   4917  HG  LEU X 306     204.806 248.645 321.886  1.00  0.00           H  
ATOM   4918 HD11 LEU X 306     203.887 248.052 324.337  1.00  0.00           H  
ATOM   4919 HD12 LEU X 306     203.776 246.481 323.691  1.00  0.00           H  
ATOM   4920 HD13 LEU X 306     202.895 247.755 322.830  1.00  0.00           H  
ATOM   4921 HD21 LEU X 306     206.309 248.817 323.938  1.00  0.00           H  
ATOM   4922 HD22 LEU X 306     206.223 247.075 324.107  1.00  0.00           H  
ATOM   4923 HD23 LEU X 306     207.085 247.856 322.662  1.00  0.00           H  
ATOM   4924  N   ARG X 307     204.454 247.541 318.735  1.00  0.00           N  
ATOM   4925  CA  ARG X 307     204.052 248.440 317.586  1.00  0.00           C  
ATOM   4926  C   ARG X 307     202.809 248.033 316.830  1.00  0.00           C  
ATOM   4927  O   ARG X 307     201.880 248.779 316.494  1.00  0.00           O  
ATOM   4928  CB  ARG X 307     205.277 248.648 316.602  1.00  0.00           C  
ATOM   4929  CG  ARG X 307     205.098 249.908 315.682  1.00  0.00           C  
ATOM   4930  CD  ARG X 307     206.303 250.348 314.792  1.00  0.00           C  
ATOM   4931  NE  ARG X 307     206.773 249.428 313.722  1.00  0.00           N  
ATOM   4932  CZ  ARG X 307     207.562 248.415 313.874  1.00  0.00           C  
ATOM   4933  NH1 ARG X 307     208.166 248.170 315.019  1.00  0.00           N1+
ATOM   4934  NH2 ARG X 307     207.909 247.731 312.833  1.00  0.00           N  
ATOM   4935  H   ARG X 307     205.375 247.129 318.786  1.00  0.00           H  
ATOM   4936  HA  ARG X 307     203.820 249.397 318.054  1.00  0.00           H  
ATOM   4937  HB2 ARG X 307     206.166 248.981 317.138  1.00  0.00           H  
ATOM   4938  HB3 ARG X 307     205.555 247.817 315.954  1.00  0.00           H
[truncated: 6,694,845 more chars]
