# Supplementary material for: Differing Membrane Interactions of Two Highly Similar Drug-Metabolizing Cytochrome P450 Isoforms: CYP 2C9 and CYP 2C19
Source: Int J Mol Sci. 2019 Sep 4;20(18):4328. doi: 10.3390/ijms20184328 (PMC6770661; doi:10.3390/ijms20184328)
Supplement: Supplementary file 1 [file ijms-20-04328-s001.zip › CYP_2C9_2C19_pdb/2C9_SIM1_final_noW.pdb]

CRYST1  140.193  141.265  161.742  90.00  90.00  90.00 P 1           1
ATOM      1  N   MET X   1     156.872 115.493 164.251  1.00  0.00           N
ATOM      2  H1  MET X   1     156.822 115.439 163.244  1.00  0.00           H
ATOM      3  H2  MET X   1     157.567 116.186 164.487  1.00  0.00           H
ATOM      4  H3  MET X   1     157.293 114.619 164.532  1.00  0.00           H
ATOM      5  CA  MET X   1     155.499 115.655 164.760  1.00  0.00           C
ATOM      6  HA  MET X   1     155.146 116.684 164.689  1.00  0.00           H
ATOM      7  CB  MET X   1     154.441 114.739 164.101  1.00  0.00           C
ATOM      8  HB2 MET X   1     154.789 113.719 163.940  1.00  0.00           H
ATOM      9  HB3 MET X   1     153.502 114.692 164.653  1.00  0.00           H
ATOM     10  CG  MET X   1     154.154 115.358 162.753  1.00  0.00           C
ATOM     11  HG2 MET X   1     153.948 116.426 162.812  1.00  0.00           H
ATOM     12  HG3 MET X   1     155.040 115.155 162.152  1.00  0.00           H
ATOM     13  SD  MET X   1     152.651 114.721 162.015  1.00  0.00           S
ATOM     14  CE  MET X   1     153.125 113.039 161.574  1.00  0.00           C
ATOM     15  HE1 MET X   1     152.191 112.533 161.328  1.00  0.00           H
ATOM     16  HE2 MET X   1     153.749 113.071 160.680  1.00  0.00           H
ATOM     17  HE3 MET X   1     153.575 112.429 162.357  1.00  0.00           H
ATOM     18  C   MET X   1     155.592 115.300 166.270  1.00  0.00           C
ATOM     19  O   MET X   1     156.100 114.219 166.589  1.00  0.00           O
ATOM     20  N   ASP X   2     155.169 116.132 167.251  1.00  0.00           N
ATOM     21  H   ASP X   2     155.219 115.847 168.218  1.00  0.00           H
ATOM     22  CA  ASP X   2     154.665 117.556 166.992  1.00  0.00           C
ATOM     23  HA  ASP X   2     155.261 117.963 166.175  1.00  0.00           H
ATOM     24  CB  ASP X   2     153.192 117.497 166.470  1.00  0.00           C
ATOM     25  HB2 ASP X   2     153.079 116.809 165.633  1.00  0.00           H
ATOM     26  HB3 ASP X   2     152.578 117.039 167.246  1.00  0.00           H
ATOM     27  CG  ASP X   2     152.560 118.821 166.092  1.00  0.00           C
ATOM     28  OD1 ASP X   2     151.333 118.869 165.846  1.00  0.00           O
ATOM     29  OD2 ASP X   2     153.319 119.786 165.917  1.00  0.00           O
ATOM     30  C   ASP X   2     154.893 118.370 168.228  1.00  0.00           C
ATOM     31  O   ASP X   2     154.275 118.110 169.199  1.00  0.00           O
ATOM     32  N   SER X   3     155.724 119.426 168.240  1.00  0.00           N
ATOM     33  H   SER X   3     156.372 119.502 167.469  1.00  0.00           H
ATOM     34  CA  SER X   3     156.092 120.106 169.543  1.00  0.00           C
ATOM     35  HA  SER X   3     156.355 119.324 170.255  1.00  0.00           H
ATOM     36  CB  SER X   3     157.360 121.007 169.320  1.00  0.00           C
ATOM     37  HB2 SER X   3     157.246 121.759 168.540  1.00  0.00           H
ATOM     38  HB3 SER X   3     157.591 121.525 170.251  1.00  0.00           H
ATOM     39  OG  SER X   3     158.470 120.267 168.941  1.00  0.00           O
ATOM     40  HG  SER X   3     158.246 119.781 168.144  1.00  0.00           H
ATOM     41  C   SER X   3     154.983 120.956 170.084  1.00  0.00           C
ATOM     42  O   SER X   3     154.993 121.151 171.271  1.00  0.00           O
ATOM     43  N   LEU X   4     153.926 121.289 169.268  1.00  0.00           N
ATOM     44  H   LEU X   4     154.028 121.149 168.273  1.00  0.00           H
ATOM     45  CA  LEU X   4     152.735 121.986 169.737  1.00  0.00           C
ATOM     46  HA  LEU X   4     153.052 122.710 170.488  1.00  0.00           H
ATOM     47  CB  LEU X   4     152.222 122.766 168.589  1.00  0.00           C
ATOM     48  HB2 LEU X   4     152.939 123.534 168.298  1.00  0.00           H
ATOM     49  HB3 LEU X   4     151.874 122.100 167.799  1.00  0.00           H
ATOM     50  CG  LEU X   4     150.986 123.591 168.962  1.00  0.00           C
ATOM     51  HG  LEU X   4     150.144 123.027 169.363  1.00  0.00           H
ATOM     52  CD1 LEU X   4     151.196 124.749 169.881  1.00  0.00           C
ATOM     53 HD11 LEU X   4     151.948 125.451 169.518  1.00  0.00           H
ATOM     54 HD12 LEU X   4     151.376 124.375 170.888  1.00  0.00           H
ATOM     55 HD13 LEU X   4     150.293 125.336 170.050  1.00  0.00           H
ATOM     56  CD2 LEU X   4     150.422 124.277 167.717  1.00  0.00           C
ATOM     57 HD21 LEU X   4     150.085 123.466 167.072  1.00  0.00           H
ATOM     58 HD22 LEU X   4     151.229 124.814 167.218  1.00  0.00           H
ATOM     59 HD23 LEU X   4     149.580 124.903 168.013  1.00  0.00           H
ATOM     60  C   LEU X   4     151.727 120.965 170.435  1.00  0.00           C
ATOM     61  O   LEU X   4     151.170 121.332 171.429  1.00  0.00           O
ATOM     62  N   VAL X   5     151.687 119.735 170.004  1.00  0.00           N
ATOM     63  H   VAL X   5     152.238 119.499 169.192  1.00  0.00           H
ATOM     64  CA  VAL X   5     151.127 118.685 170.854  1.00  0.00           C
ATOM     65  HA  VAL X   5     150.064 118.884 170.989  1.00  0.00           H
ATOM     66  CB  VAL X   5     151.027 117.387 170.114  1.00  0.00           C
ATOM     67  HB  VAL X   5     152.001 117.314 169.628  1.00  0.00           H
ATOM     68  CG1 VAL X   5     150.819 116.196 171.023  1.00  0.00           C
ATOM     69 HG11 VAL X   5     150.855 115.264 170.459  1.00  0.00           H
ATOM     70 HG12 VAL X   5     151.713 116.120 171.643  1.00  0.00           H
ATOM     71 HG13 VAL X   5     149.878 116.394 171.537  1.00  0.00           H
ATOM     72  CG2 VAL X   5     149.847 117.342 169.069  1.00  0.00           C
ATOM     73 HG21 VAL X   5     148.931 117.141 169.625  1.00  0.00           H
ATOM     74 HG22 VAL X   5     150.040 116.488 168.420  1.00  0.00           H
ATOM     75 HG23 VAL X   5     149.742 118.264 168.497  1.00  0.00           H
ATOM     76  C   VAL X   5     151.887 118.609 172.146  1.00  0.00           C
ATOM     77  O   VAL X   5     151.333 118.565 173.244  1.00  0.00           O
ATOM     78  N   VAL X   6     153.211 118.541 172.076  1.00  0.00           N
ATOM     79  H   VAL X   6     153.644 118.624 171.167  1.00  0.00           H
ATOM     80  CA  VAL X   6     154.033 118.152 173.257  1.00  0.00           C
ATOM     81  HA  VAL X   6     153.670 117.209 173.667  1.00  0.00           H
ATOM     82  CB  VAL X   6     155.538 117.995 172.859  1.00  0.00           C
ATOM     83  HB  VAL X   6     155.821 118.727 172.103  1.00  0.00           H
ATOM     84  CG1 VAL X   6     156.634 117.917 173.951  1.00  0.00           C
ATOM     85 HG11 VAL X   6     156.788 118.885 174.428  1.00  0.00           H
ATOM     86 HG12 VAL X   6     156.251 117.176 174.652  1.00  0.00           H
ATOM     87 HG13 VAL X   6     157.599 117.624 173.536  1.00  0.00           H
ATOM     88  CG2 VAL X   6     155.689 116.667 172.209  1.00  0.00           C
ATOM     89 HG21 VAL X   6     156.727 116.580 171.889  1.00  0.00           H
ATOM     90 HG22 VAL X   6     154.917 116.484 171.461  1.00  0.00           H
ATOM     91 HG23 VAL X   6     155.443 115.913 172.957  1.00  0.00           H
ATOM     92  C   VAL X   6     153.825 119.249 174.339  1.00  0.00           C
ATOM     93  O   VAL X   6     153.609 118.989 175.504  1.00  0.00           O
ATOM     94  N   LEU X   7     153.892 120.545 173.950  1.00  0.00           N
ATOM     95  H   LEU X   7     154.000 120.680 172.955  1.00  0.00           H
ATOM     96  CA  LEU X   7     153.610 121.676 174.779  1.00  0.00           C
ATOM     97  HA  LEU X   7     154.334 121.618 175.591  1.00  0.00           H
ATOM     98  CB  LEU X   7     154.026 122.938 174.082  1.00  0.00           C
ATOM     99  HB2 LEU X   7     155.047 122.848 173.712  1.00  0.00           H
ATOM    100  HB3 LEU X   7     153.404 123.061 173.195  1.00  0.00           H
ATOM    101  CG  LEU X   7     153.855 124.258 174.973  1.00  0.00           C
ATOM    102  HG  LEU X   7     152.928 124.171 175.540  1.00  0.00           H
ATOM    103  CD1 LEU X   7     155.028 124.517 175.903  1.00  0.00           C
ATOM    104 HD11 LEU X   7     155.918 124.664 175.290  1.00  0.00           H
ATOM    105 HD12 LEU X   7     155.048 123.724 176.650  1.00  0.00           H
ATOM    106 HD13 LEU X   7     154.867 125.459 176.427  1.00  0.00           H
ATOM    107  CD2 LEU X   7     153.641 125.467 174.055  1.00  0.00           C
ATOM    108 HD21 LEU X   7     152.909 125.185 173.298  1.00  0.00           H
ATOM    109 HD22 LEU X   7     153.264 126.283 174.673  1.00  0.00           H
ATOM    110 HD23 LEU X   7     154.528 125.843 173.545  1.00  0.00           H
ATOM    111  C   LEU X   7     152.176 121.644 175.301  1.00  0.00           C
ATOM    112  O   LEU X   7     151.948 121.914 176.472  1.00  0.00           O
ATOM    113  N   VAL X   8     151.082 121.394 174.502  1.00  0.00           N
ATOM    114  H   VAL X   8     151.200 121.459 173.501  1.00  0.00           H
ATOM    115  CA  VAL X   8     149.670 121.310 174.916  1.00  0.00           C
ATOM    116  HA  VAL X   8     149.343 122.165 175.507  1.00  0.00           H
ATOM    117  CB  VAL X   8     148.734 121.154 173.735  1.00  0.00           C
ATOM    118  HB  VAL X   8     149.180 120.488 172.996  1.00  0.00           H
ATOM    119  CG1 VAL X   8     147.401 120.561 174.103  1.00  0.00           C
ATOM    120 HG11 VAL X   8     146.651 120.644 173.316  1.00  0.00           H
ATOM    121 HG12 VAL X   8     147.552 119.484 174.176  1.00  0.00           H
ATOM    122 HG13 VAL X   8     146.911 120.899 175.016  1.00  0.00           H
ATOM    123  CG2 VAL X   8     148.496 122.491 173.025  1.00  0.00           C
ATOM    124 HG21 VAL X   8     147.919 122.390 172.106  1.00  0.00           H
ATOM    125 HG22 VAL X   8     149.447 122.952 172.758  1.00  0.00           H
ATOM    126 HG23 VAL X   8     148.017 123.232 173.666  1.00  0.00           H
ATOM    127  C   VAL X   8     149.523 120.138 175.939  1.00  0.00           C
ATOM    128  O   VAL X   8     148.879 120.357 176.986  1.00  0.00           O
ATOM    129  N   LEU X   9     150.193 118.978 175.817  1.00  0.00           N
ATOM    130  H   LEU X   9     150.815 118.793 175.043  1.00  0.00           H
ATOM    131  CA  LEU X   9     150.344 117.988 176.899  1.00  0.00           C
ATOM    132  HA  LEU X   9     149.331 117.841 177.274  1.00  0.00           H
ATOM    133  CB  LEU X   9     150.880 116.627 176.452  1.00  0.00           C
ATOM    134  HB2 LEU X   9     151.586 116.964 175.692  1.00  0.00           H
ATOM    135  HB3 LEU X   9     151.375 116.132 177.287  1.00  0.00           H
ATOM    136  CG  LEU X   9     149.944 115.585 175.778  1.00  0.00           C
ATOM    137  HG  LEU X   9     150.541 114.795 175.322  1.00  0.00           H
ATOM    138  CD1 LEU X   9     149.135 114.899 176.850  1.00  0.00           C
ATOM    139 HD11 LEU X   9     148.395 114.314 176.303  1.00  0.00           H
ATOM    140 HD12 LEU X   9     148.682 115.596 177.555  1.00  0.00           H
ATOM    141 HD13 LEU X   9     149.696 114.104 177.340  1.00  0.00           H
ATOM    142  CD2 LEU X   9     148.940 116.192 174.842  1.00  0.00           C
ATOM    143 HD21 LEU X   9     149.339 117.022 174.259  1.00  0.00           H
ATOM    144 HD22 LEU X   9     148.744 115.342 174.188  1.00  0.00           H
ATOM    145 HD23 LEU X   9     148.004 116.487 175.314  1.00  0.00           H
ATOM    146  C   LEU X   9     151.089 118.431 178.131  1.00  0.00           C
ATOM    147  O   LEU X   9     150.598 118.261 179.220  1.00  0.00           O
ATOM    148  N   CYS X  10     152.247 119.017 178.020  1.00  0.00           N
ATOM    149  H   CYS X  10     152.751 119.056 177.146  1.00  0.00           H
ATOM    150  CA  CYS X  10     152.903 119.650 179.220  1.00  0.00           C
ATOM    151  HA  CYS X  10     153.229 118.931 179.971  1.00  0.00           H
ATOM    152  CB  CYS X  10     154.140 120.422 178.755  1.00  0.00           C
ATOM    153  HB2 CYS X  10     153.913 121.242 178.074  1.00  0.00           H
ATOM    154  HB3 CYS X  10     154.536 120.930 179.634  1.00  0.00           H
ATOM    155  SG  CYS X  10     155.551 119.550 178.037  1.00  0.00           S
ATOM    156  HG  CYS X  10     155.091 119.208 176.831  1.00  0.00           H
ATOM    157  C   CYS X  10     151.962 120.681 179.959  1.00  0.00           C
ATOM    158  O   CYS X  10     151.874 120.644 181.195  1.00  0.00           O
ATOM    159  N   LEU X  11     151.205 121.486 179.231  1.00  0.00           N
ATOM    160  H   LEU X  11     151.413 121.555 178.245  1.00  0.00           H
ATOM    161  CA  LEU X  11     150.168 122.379 179.809  1.00  0.00           C
ATOM    162  HA  LEU X  11     150.606 122.992 180.597  1.00  0.00           H
ATOM    163  CB  LEU X  11     149.626 123.347 178.719  1.00  0.00           C
ATOM    164  HB2 LEU X  11     149.385 122.737 177.849  1.00  0.00           H
ATOM    165  HB3 LEU X  11     148.733 123.799 179.152  1.00  0.00           H
ATOM    166  CG  LEU X  11     150.483 124.387 178.168  1.00  0.00           C
ATOM    167  HG  LEU X  11     151.493 124.057 177.922  1.00  0.00           H
ATOM    168  CD1 LEU X  11     150.029 125.031 176.856  1.00  0.00           C
ATOM    169 HD11 LEU X  11     149.733 124.239 176.168  1.00  0.00           H
ATOM    170 HD12 LEU X  11     150.817 125.648 176.425  1.00  0.00           H
ATOM    171 HD13 LEU X  11     149.117 125.613 176.991  1.00  0.00           H
ATOM    172  CD2 LEU X  11     150.641 125.481 179.137  1.00  0.00           C
ATOM    173 HD21 LEU X  11     151.428 126.142 178.774  1.00  0.00           H
ATOM    174 HD22 LEU X  11     149.744 126.101 179.124  1.00  0.00           H
ATOM    175 HD23 LEU X  11     151.008 125.082 180.082  1.00  0.00           H
ATOM    176  C   LEU X  11     149.073 121.517 180.433  1.00  0.00           C
ATOM    177  O   LEU X  11     148.844 121.705 181.603  1.00  0.00           O
ATOM    178  N   SER X  12     148.617 120.465 179.808  1.00  0.00           N
ATOM    179  H   SER X  12     148.952 120.378 178.860  1.00  0.00           H
ATOM    180  CA  SER X  12     147.584 119.571 180.361  1.00  0.00           C
ATOM    181  HA  SER X  12     146.674 120.154 180.506  1.00  0.00           H
ATOM    182  CB  SER X  12     147.122 118.503 179.336  1.00  0.00           C
ATOM    183  HB2 SER X  12     148.014 117.889 179.212  1.00  0.00           H
ATOM    184  HB3 SER X  12     146.332 117.919 179.809  1.00  0.00           H
ATOM    185  OG  SER X  12     146.723 119.051 178.070  1.00  0.00           O
ATOM    186  HG  SER X  12     147.404 119.641 177.738  1.00  0.00           H
ATOM    187  C   SER X  12     148.042 118.941 181.714  1.00  0.00           C
ATOM    188  O   SER X  12     147.182 118.755 182.527  1.00  0.00           O
ATOM    189  N   CYS X  13     149.366 118.657 181.835  1.00  0.00           N
ATOM    190  H   CYS X  13     149.876 118.777 180.972  1.00  0.00           H
ATOM    191  CA  CYS X  13     149.992 118.123 183.094  1.00  0.00           C
ATOM    192  HA  CYS X  13     149.558 117.222 183.527  1.00  0.00           H
ATOM    193  CB  CYS X  13     151.344 117.580 182.712  1.00  0.00           C
ATOM    194  HB2 CYS X  13     151.984 118.346 182.274  1.00  0.00           H
ATOM    195  HB3 CYS X  13     151.776 117.193 183.635  1.00  0.00           H
ATOM    196  SG  CYS X  13     151.122 116.142 181.608  1.00  0.00           S
ATOM    197  HG  CYS X  13     151.372 116.734 180.437  1.00  0.00           H
ATOM    198  C   CYS X  13     150.098 119.198 184.184  1.00  0.00           C
ATOM    199  O   CYS X  13     149.820 118.868 185.337  1.00  0.00           O
ATOM    200  N   LEU X  14     150.421 120.416 183.872  1.00  0.00           N
ATOM    201  H   LEU X  14     150.485 120.642 182.889  1.00  0.00           H
ATOM    202  CA  LEU X  14     150.553 121.531 184.839  1.00  0.00           C
ATOM    203  HA  LEU X  14     151.167 121.198 185.675  1.00  0.00           H
ATOM    204  CB  LEU X  14     151.263 122.745 184.131  1.00  0.00           C
ATOM    205  HB2 LEU X  14     150.807 122.996 183.173  1.00  0.00           H
ATOM    206  HB3 LEU X  14     151.211 123.672 184.701  1.00  0.00           H
ATOM    207  CG  LEU X  14     152.730 122.399 183.913  1.00  0.00           C
ATOM    208  HG  LEU X  14     152.958 121.438 183.452  1.00  0.00           H
ATOM    209  CD1 LEU X  14     153.194 123.627 183.144  1.00  0.00           C
ATOM    210 HD11 LEU X  14     152.943 124.547 183.673  1.00  0.00           H
ATOM    211 HD12 LEU X  14     152.635 123.551 182.212  1.00  0.00           H
ATOM    212 HD13 LEU X  14     154.270 123.611 182.971  1.00  0.00           H
ATOM    213  CD2 LEU X  14     153.585 122.535 185.162  1.00  0.00           C
ATOM    214 HD21 LEU X  14     153.278 121.688 185.776  1.00  0.00           H
ATOM    215 HD22 LEU X  14     154.624 122.274 184.961  1.00  0.00           H
ATOM    216 HD23 LEU X  14     153.596 123.478 185.707  1.00  0.00           H
ATOM    217  C   LEU X  14     149.195 121.890 185.495  1.00  0.00           C
ATOM    218  O   LEU X  14     149.124 122.062 186.749  1.00  0.00           O
ATOM    219  N   LEU X  15     148.117 121.701 184.714  1.00  0.00           N
ATOM    220  H   LEU X  15     148.243 121.473 183.739  1.00  0.00           H
ATOM    221  CA  LEU X  15     146.740 121.798 185.219  1.00  0.00           C
ATOM    222  HA  LEU X  15     146.643 122.529 186.021  1.00  0.00           H
ATOM    223  CB  LEU X  15     145.937 122.212 183.997  1.00  0.00           C
ATOM    224  HB2 LEU X  15     146.375 123.188 183.787  1.00  0.00           H
ATOM    225  HB3 LEU X  15     146.058 121.477 183.202  1.00  0.00           H
ATOM    226  CG  LEU X  15     144.423 122.312 184.269  1.00  0.00           C
ATOM    227  HG  LEU X  15     144.084 121.349 184.650  1.00  0.00           H
ATOM    228  CD1 LEU X  15     144.050 123.353 185.335  1.00  0.00           C
ATOM    229 HD11 LEU X  15     144.456 124.315 185.026  1.00  0.00           H
ATOM    230 HD12 LEU X  15     144.567 123.084 186.257  1.00  0.00           H
ATOM    231 HD13 LEU X  15     142.963 123.374 185.416  1.00  0.00           H
ATOM    232  CD2 LEU X  15     143.630 122.739 183.033  1.00  0.00           C
ATOM    233 HD21 LEU X  15     143.998 123.746 182.836  1.00  0.00           H
ATOM    234 HD22 LEU X  15     143.747 122.085 182.169  1.00  0.00           H
ATOM    235 HD23 LEU X  15     142.561 122.849 183.217  1.00  0.00           H
ATOM    236  C   LEU X  15     146.282 120.455 185.859  1.00  0.00           C
ATOM    237  O   LEU X  15     145.914 120.598 187.044  1.00  0.00           O
ATOM    238  N   LEU X  16     146.552 119.236 185.342  1.00  0.00           N
ATOM    239  H   LEU X  16     146.966 119.126 184.428  1.00  0.00           H
ATOM    240  CA  LEU X  16     146.307 117.960 186.010  1.00  0.00           C
ATOM    241  HA  LEU X  16     145.236 117.801 186.140  1.00  0.00           H
ATOM    242  CB  LEU X  16     146.733 116.775 184.993  1.00  0.00           C
ATOM    243  HB2 LEU X  16     146.358 116.961 183.986  1.00  0.00           H
ATOM    244  HB3 LEU X  16     147.817 116.882 185.011  1.00  0.00           H
ATOM    245  CG  LEU X  16     146.409 115.310 185.402  1.00  0.00           C
ATOM    246  HG  LEU X  16     146.310 115.018 186.447  1.00  0.00           H
ATOM    247  CD1 LEU X  16     145.134 114.900 184.763  1.00  0.00           C
ATOM    248 HD11 LEU X  16     144.465 115.699 185.080  1.00  0.00           H
ATOM    249 HD12 LEU X  16     144.925 113.856 184.997  1.00  0.00           H
ATOM    250 HD13 LEU X  16     145.261 114.961 183.682  1.00  0.00           H
ATOM    251  CD2 LEU X  16     147.475 114.352 184.814  1.00  0.00           C
ATOM    252 HD21 LEU X  16     148.351 114.461 185.453  1.00  0.00           H
ATOM    253 HD22 LEU X  16     147.154 113.310 184.793  1.00  0.00           H
ATOM    254 HD23 LEU X  16     147.721 114.653 183.796  1.00  0.00           H
ATOM    255  C   LEU X  16     146.946 117.793 187.277  1.00  0.00           C
ATOM    256  O   LEU X  16     146.329 117.175 188.158  1.00  0.00           O
ATOM    257  N   LEU X  17     148.165 118.343 187.524  1.00  0.00           N
ATOM    258  H   LEU X  17     148.536 118.872 186.747  1.00  0.00           H
ATOM    259  CA  LEU X  17     148.862 118.362 188.887  1.00  0.00           C
ATOM    260  HA  LEU X  17     148.739 117.371 189.324  1.00  0.00           H
ATOM    261  CB  LEU X  17     150.339 118.487 188.597  1.00  0.00           C
ATOM    262  HB2 LEU X  17     150.556 119.173 187.778  1.00  0.00           H
ATOM    263  HB3 LEU X  17     150.913 118.951 189.399  1.00  0.00           H
ATOM    264  CG  LEU X  17     150.972 117.052 188.289  1.00  0.00           C
ATOM    265  HG  LEU X  17     150.831 116.397 189.150  1.00  0.00           H
ATOM    266  CD1 LEU X  17     150.527 116.257 187.082  1.00  0.00           C
ATOM    267 HD11 LEU X  17     150.846 116.669 186.124  1.00  0.00           H
ATOM    268 HD12 LEU X  17     149.449 116.101 187.112  1.00  0.00           H
ATOM    269 HD13 LEU X  17     151.007 115.279 187.037  1.00  0.00           H
ATOM    270  CD2 LEU X  17     152.504 117.175 188.153  1.00  0.00           C
ATOM    271 HD21 LEU X  17     152.853 117.558 187.194  1.00  0.00           H
ATOM    272 HD22 LEU X  17     152.816 117.868 188.934  1.00  0.00           H
ATOM    273 HD23 LEU X  17     153.013 116.220 188.281  1.00  0.00           H
ATOM    274  C   LEU X  17     148.209 119.436 189.850  1.00  0.00           C
ATOM    275  O   LEU X  17     147.985 119.103 191.036  1.00  0.00           O
ATOM    276  N   SER X  18     147.787 120.636 189.329  1.00  0.00           N
ATOM    277  H   SER X  18     147.811 120.864 188.345  1.00  0.00           H
ATOM    278  CA  SER X  18     147.047 121.697 190.162  1.00  0.00           C
ATOM    279  HA  SER X  18     147.627 121.907 191.061  1.00  0.00           H
ATOM    280  CB  SER X  18     146.981 123.027 189.442  1.00  0.00           C
ATOM    281  HB2 SER X  18     146.426 122.948 188.507  1.00  0.00           H
ATOM    282  HB3 SER X  18     146.639 123.839 190.083  1.00  0.00           H
ATOM    283  OG  SER X  18     148.346 123.297 189.106  1.00  0.00           O
ATOM    284  HG  SER X  18     148.566 122.872 188.274  1.00  0.00           H
ATOM    285  C   SER X  18     145.600 121.251 190.574  1.00  0.00           C
ATOM    286  O   SER X  18     145.073 121.785 191.544  1.00  0.00           O
ATOM    287  N   LEU X  19     145.000 120.309 189.904  1.00  0.00           N
ATOM    288  H   LEU X  19     145.448 119.995 189.055  1.00  0.00           H
ATOM    289  CA  LEU X  19     143.857 119.488 190.273  1.00  0.00           C
ATOM    290  HA  LEU X  19     143.097 120.039 190.828  1.00  0.00           H
ATOM    291  CB  LEU X  19     143.095 118.980 188.995  1.00  0.00           C
ATOM    292  HB2 LEU X  19     143.870 118.435 188.457  1.00  0.00           H
ATOM    293  HB3 LEU X  19     142.350 118.227 189.251  1.00  0.00           H
ATOM    294  CG  LEU X  19     142.585 120.029 188.024  1.00  0.00           C
ATOM    295  HG  LEU X  19     143.382 120.710 187.727  1.00  0.00           H
ATOM    296  CD1 LEU X  19     141.970 119.390 186.736  1.00  0.00           C
ATOM    297 HD11 LEU X  19     142.707 118.843 186.148  1.00  0.00           H
ATOM    298 HD12 LEU X  19     141.623 120.289 186.227  1.00  0.00           H
ATOM    299 HD13 LEU X  19     141.147 118.707 186.949  1.00  0.00           H
ATOM    300  CD2 LEU X  19     141.475 120.817 188.690  1.00  0.00           C
ATOM    301 HD21 LEU X  19     141.002 121.497 187.982  1.00  0.00           H
ATOM    302 HD22 LEU X  19     140.767 120.048 188.998  1.00  0.00           H
ATOM    303 HD23 LEU X  19     141.845 121.379 189.548  1.00  0.00           H
ATOM    304  C   LEU X  19     144.117 118.176 191.126  1.00  0.00           C
ATOM    305  O   LEU X  19     143.156 117.568 191.579  1.00  0.00           O
ATOM    306  N   TRP X  20     145.362 117.778 191.363  1.00  0.00           N
ATOM    307  H   TRP X  20     146.115 118.210 190.847  1.00  0.00           H
ATOM    308  CA  TRP X  20     145.807 116.681 192.258  1.00  0.00           C
ATOM    309  HA  TRP X  20     144.990 115.995 192.484  1.00  0.00           H
ATOM    310  CB  TRP X  20     146.952 115.884 191.508  1.00  0.00           C
ATOM    311  HB2 TRP X  20     146.498 115.470 190.607  1.00  0.00           H
ATOM    312  HB3 TRP X  20     147.740 116.539 191.136  1.00  0.00           H
ATOM    313  CG  TRP X  20     147.586 114.689 192.290  1.00  0.00           C
ATOM    314  CD1 TRP X  20     147.161 113.419 192.266  1.00  0.00           C
ATOM    315  HD1 TRP X  20     146.408 113.059 191.580  1.00  0.00           H
ATOM    316  NE1 TRP X  20     148.067 112.621 193.033  1.00  0.00           N
ATOM    317  HE1 TRP X  20     147.999 111.626 193.192  1.00  0.00           H
ATOM    318  CE2 TRP X  20     149.029 113.444 193.648  1.00  0.00           C
ATOM    319  CZ2 TRP X  20     149.973 113.213 194.644  1.00  0.00           C
ATOM    320  HZ2 TRP X  20     149.999 112.285 195.196  1.00  0.00           H
ATOM    321  CH2 TRP X  20     150.844 114.253 195.077  1.00  0.00           C
ATOM    322  HH2 TRP X  20     151.635 114.062 195.787  1.00  0.00           H
ATOM    323  CZ3 TRP X  20     150.669 115.534 194.482  1.00  0.00           C
ATOM    324  HZ3 TRP X  20     151.271 116.325 194.905  1.00  0.00           H
ATOM    325  CE3 TRP X  20     149.661 115.767 193.545  1.00  0.00           C
ATOM    326  HE3 TRP X  20     149.588 116.747 193.097  1.00  0.00           H
ATOM    327  CD2 TRP X  20     148.828 114.702 193.096  1.00  0.00           C
ATOM    328  C   TRP X  20     146.240 117.204 193.682  1.00  0.00           C
ATOM    329  O   TRP X  20     145.832 116.622 194.695  1.00  0.00           O
ATOM    330  N   ARG X  21     146.822 118.404 193.748  1.00  0.00           N
ATOM    331  H   ARG X  21     147.076 118.875 192.892  1.00  0.00           H
ATOM    332  CA  ARG X  21     147.308 119.140 194.948  1.00  0.00           C
ATOM    333  HA  ARG X  21     146.633 118.892 195.767  1.00  0.00           H
ATOM    334  CB  ARG X  21     148.732 118.633 195.266  1.00  0.00           C
ATOM    335  HB2 ARG X  21     148.645 117.569 195.485  1.00  0.00           H
ATOM    336  HB3 ARG X  21     149.323 118.739 194.356  1.00  0.00           H
ATOM    337  CG  ARG X  21     149.280 119.311 196.555  1.00  0.00           C
ATOM    338  HG2 ARG X  21     149.599 120.315 196.273  1.00  0.00           H
ATOM    339  HG3 ARG X  21     148.457 119.425 197.261  1.00  0.00           H
ATOM    340  CD  ARG X  21     150.524 118.520 197.042  1.00  0.00           C
ATOM    341  HD2 ARG X  21     150.880 118.846 198.020  1.00  0.00           H
ATOM    342  HD3 ARG X  21     150.254 117.464 197.063  1.00  0.00           H
ATOM    343  NE  ARG X  21     151.656 118.686 196.168  1.00  0.00           N
ATOM    344  HE  ARG X  21     151.679 119.511 195.585  1.00  0.00           H
ATOM    345  CZ  ARG X  21     152.859 118.050 196.190  1.00  0.00           C
ATOM    346  NH1 ARG X  21     153.055 117.097 197.023  1.00  0.00           N
ATOM    347 HH11 ARG X  21     152.439 116.887 197.796  1.00  0.00           H
ATOM    348 HH12 ARG X  21     153.991 116.717 197.036  1.00  0.00           H
ATOM    349  NH2 ARG X  21     153.825 118.304 195.453  1.00  0.00           N
ATOM    350 HH21 ARG X  21     153.756 119.042 194.767  1.00  0.00           H
ATOM    351 HH22 ARG X  21     154.630 117.736 195.673  1.00  0.00           H
ATOM    352  C   ARG X  21     147.283 120.620 194.660  1.00  0.00           C
ATOM    353  O   ARG X  21     147.678 121.059 193.581  1.00  0.00           O
ATOM    354  N   GLN X  22     146.829 121.352 195.653  1.00  0.00           N
ATOM    355  H   GLN X  22     146.581 120.972 196.555  1.00  0.00           H
ATOM    356  CA  GLN X  22     146.743 122.839 195.538  1.00  0.00           C
ATOM    357  HA  GLN X  22     146.524 122.938 194.475  1.00  0.00           H
ATOM    358  CB  GLN X  22     145.775 123.511 196.473  1.00  0.00           C
ATOM    359  HB2 GLN X  22     146.109 123.235 197.474  1.00  0.00           H
ATOM    360  HB3 GLN X  22     145.913 124.592 196.480  1.00  0.00           H
ATOM    361  CG  GLN X  22     144.320 123.196 196.362  1.00  0.00           C
ATOM    362  HG2 GLN X  22     143.899 123.573 195.429  1.00  0.00           H
ATOM    363  HG3 GLN X  22     144.358 122.108 196.316  1.00  0.00           H
ATOM    364  CD  GLN X  22     143.460 123.743 197.464  1.00  0.00           C
ATOM    365  OE1 GLN X  22     143.876 124.400 198.469  1.00  0.00           O
ATOM    366  NE2 GLN X  22     142.151 123.442 197.415  1.00  0.00           N
ATOM    367 HE21 GLN X  22     141.638 123.367 198.282  1.00  0.00           H
ATOM    368 HE22 GLN X  22     141.807 123.010 196.569  1.00  0.00           H
ATOM    369  C   GLN X  22     148.161 123.441 195.870  1.00  0.00           C
ATOM    370  O   GLN X  22     148.638 124.343 195.171  1.00  0.00           O
ATOM    371  N   SER X  23     148.890 122.966 196.870  1.00  0.00           N
ATOM    372  H   SER X  23     148.446 122.329 197.515  1.00  0.00           H
ATOM    373  CA  SER X  23     150.184 123.415 197.293  1.00  0.00           C
ATOM    374  HA  SER X  23     150.028 124.413 197.701  1.00  0.00           H
ATOM    375  CB  SER X  23     150.512 122.623 198.520  1.00  0.00           C
ATOM    376  HB2 SER X  23     149.665 122.681 199.203  1.00  0.00           H
ATOM    377  HB3 SER X  23     150.570 121.590 198.178  1.00  0.00           H
ATOM    378  OG  SER X  23     151.737 123.081 199.118  1.00  0.00           O
ATOM    379  HG  SER X  23     151.606 123.485 199.979  1.00  0.00           H
ATOM    380  C   SER X  23     151.197 123.356 196.157  1.00  0.00           C
ATOM    381  O   SER X  23     151.339 122.256 195.624  1.00  0.00           O
ATOM    382  N   SER X  24     151.879 124.488 195.911  1.00  0.00           N
ATOM    383  H   SER X  24     151.633 125.360 196.356  1.00  0.00           H
ATOM    384  CA  SER X  24     152.903 124.511 194.808  1.00  0.00           C
ATOM    385  HA  SER X  24     153.767 123.932 195.135  1.00  0.00           H
ATOM    386  CB  SER X  24     152.299 124.093 193.478  1.00  0.00           C
ATOM    387  HB2 SER X  24     152.141 123.016 193.430  1.00  0.00           H
ATOM    388  HB3 SER X  24     151.358 124.644 193.476  1.00  0.00           H
ATOM    389  OG  SER X  24     152.964 124.515 192.329  1.00  0.00           O
ATOM    390  HG  SER X  24     153.690 123.887 192.311  1.00  0.00           H
ATOM    391  C   SER X  24     153.443 125.985 194.609  1.00  0.00           C
ATOM    392  O   SER X  24     152.684 126.891 194.201  1.00  0.00           O
ATOM    393  N   GLY X  25     154.631 126.317 195.144  1.00  0.00           N
ATOM    394  H   GLY X  25     155.088 125.563 195.635  1.00  0.00           H
ATOM    395  CA  GLY X  25     155.104 127.652 195.476  1.00  0.00           C
ATOM    396  HA2 GLY X  25     156.192 127.718 195.483  1.00  0.00           H
ATOM    397  HA3 GLY X  25     154.632 128.256 194.701  1.00  0.00           H
ATOM    398  C   GLY X  25     154.594 128.106 196.864  1.00  0.00           C
ATOM    399  O   GLY X  25     155.073 127.737 197.915  1.00  0.00           O
ATOM    400  N   ARG X  26     153.511 128.889 196.710  1.00  0.00           N
ATOM    401  H   ARG X  26     153.320 129.182 195.763  1.00  0.00           H
ATOM    402  CA  ARG X  26     152.645 129.212 197.840  1.00  0.00           C
ATOM    403  HA  ARG X  26     153.276 129.392 198.710  1.00  0.00           H
ATOM    404  CB  ARG X  26     151.940 130.511 197.457  1.00  0.00           C
ATOM    405  HB2 ARG X  26     151.593 130.467 196.425  1.00  0.00           H
ATOM    406  HB3 ARG X  26     151.168 130.719 198.197  1.00  0.00           H
ATOM    407  CG  ARG X  26     153.041 131.572 197.470  1.00  0.00           C
ATOM    408  HG2 ARG X  26     153.433 131.686 198.480  1.00  0.00           H
ATOM    409  HG3 ARG X  26     153.804 131.374 196.718  1.00  0.00           H
ATOM    410  CD  ARG X  26     152.405 132.930 197.117  1.00  0.00           C
ATOM    411  HD2 ARG X  26     151.805 132.865 196.210  1.00  0.00           H
ATOM    412  HD3 ARG X  26     151.832 133.327 197.955  1.00  0.00           H
ATOM    413  NE  ARG X  26     153.444 133.933 196.722  1.00  0.00           N
ATOM    414  HE  ARG X  26     154.105 133.847 195.963  1.00  0.00           H
ATOM    415  CZ  ARG X  26     153.656 135.152 197.221  1.00  0.00           C
ATOM    416  NH1 ARG X  26     152.898 135.788 198.052  1.00  0.00           N
ATOM    417 HH11 ARG X  26     152.152 135.201 198.394  1.00  0.00           H
ATOM    418 HH12 ARG X  26     152.854 136.796 198.096  1.00  0.00           H
ATOM    419  NH2 ARG X  26     154.681 135.829 196.728  1.00  0.00           N
ATOM    420 HH21 ARG X  26     155.311 135.500 196.012  1.00  0.00           H
ATOM    421 HH22 ARG X  26     154.857 136.708 197.193  1.00  0.00           H
ATOM    422  C   ARG X  26     151.745 127.993 198.294  1.00  0.00           C
ATOM    423  O   ARG X  26     151.521 127.026 197.581  1.00  0.00           O
ATOM    424  N   GLY X  27     151.229 128.003 199.542  1.00  0.00           N
ATOM    425  H   GLY X  27     151.314 128.869 200.054  1.00  0.00           H
ATOM    426  CA  GLY X  27     150.602 126.846 200.223  1.00  0.00           C
ATOM    427  HA2 GLY X  27     151.265 126.010 200.000  1.00  0.00           H
ATOM    428  HA3 GLY X  27     150.542 127.070 201.288  1.00  0.00           H
ATOM    429  C   GLY X  27     149.157 126.515 199.633  1.00  0.00           C
ATOM    430  O   GLY X  27     148.635 125.413 199.791  1.00  0.00           O
ATOM    431  N   LYS X  28     148.638 127.389 198.790  1.00  0.00           N
ATOM    432  H   LYS X  28     149.294 128.062 198.420  1.00  0.00           H
ATOM    433  CA  LYS X  28     147.464 127.414 197.924  1.00  0.00           C
ATOM    434  HA  LYS X  28     147.053 126.426 197.718  1.00  0.00           H
ATOM    435  CB  LYS X  28     146.315 128.139 198.657  1.00  0.00           C
ATOM    436  HB2 LYS X  28     146.767 129.054 199.040  1.00  0.00           H
ATOM    437  HB3 LYS X  28     145.583 128.613 198.004  1.00  0.00           H
ATOM    438  CG  LYS X  28     145.667 127.136 199.659  1.00  0.00           C
ATOM    439  HG2 LYS X  28     145.319 126.241 199.143  1.00  0.00           H
ATOM    440  HG3 LYS X  28     146.442 126.906 200.390  1.00  0.00           H
ATOM    441  CD  LYS X  28     144.502 127.747 200.477  1.00  0.00           C
ATOM    442  HD2 LYS X  28     144.241 127.032 201.257  1.00  0.00           H
ATOM    443  HD3 LYS X  28     144.899 128.626 200.986  1.00  0.00           H
ATOM    444  CE  LYS X  28     143.270 128.187 199.654  1.00  0.00           C
ATOM    445  HE2 LYS X  28     142.626 128.791 200.294  1.00  0.00           H
ATOM    446  HE3 LYS X  28     143.456 128.916 198.866  1.00  0.00           H
ATOM    447  NZ  LYS X  28     142.606 127.098 198.989  1.00  0.00           N
ATOM    448  HZ1 LYS X  28     141.746 127.489 198.631  1.00  0.00           H
ATOM    449  HZ2 LYS X  28     142.430 126.260 199.524  1.00  0.00           H
ATOM    450  HZ3 LYS X  28     143.139 126.713 198.222  1.00  0.00           H
ATOM    451  C   LYS X  28     147.723 128.127 196.605  1.00  0.00           C
ATOM    452  O   LYS X  28     148.662 128.872 196.567  1.00  0.00           O
ATOM    453  N   LEU X  29     146.867 127.905 195.587  1.00  0.00           N
ATOM    454  H   LEU X  29     145.972 127.497 195.816  1.00  0.00           H
ATOM    455  CA  LEU X  29     147.080 128.304 194.168  1.00  0.00           C
ATOM    456  HA  LEU X  29     148.077 128.040 193.815  1.00  0.00           H
ATOM    457  CB  LEU X  29     145.885 127.688 193.316  1.00  0.00           C
ATOM    458  HB2 LEU X  29     144.937 127.892 193.814  1.00  0.00           H
ATOM    459  HB3 LEU X  29     145.725 128.281 192.415  1.00  0.00           H
ATOM    460  CG  LEU X  29     145.965 126.200 193.034  1.00  0.00           C
ATOM    461  HG  LEU X  29     145.792 125.610 193.935  1.00  0.00           H
ATOM    462  CD1 LEU X  29     144.893 125.790 192.022  1.00  0.00           C
ATOM    463 HD11 LEU X  29     144.780 124.709 192.107  1.00  0.00           H
ATOM    464 HD12 LEU X  29     145.127 126.086 190.999  1.00  0.00           H
ATOM    465 HD13 LEU X  29     143.957 126.224 192.373  1.00  0.00           H
ATOM    466  CD2 LEU X  29     147.248 125.882 192.262  1.00  0.00           C
ATOM    467 HD21 LEU X  29     148.107 125.921 192.931  1.00  0.00           H
ATOM    468 HD22 LEU X  29     147.186 124.815 192.046  1.00  0.00           H
ATOM    469 HD23 LEU X  29     147.422 126.473 191.362  1.00  0.00           H
ATOM    470  C   LEU X  29     147.045 129.818 193.930  1.00  0.00           C
ATOM    471  O   LEU X  29     146.330 130.408 194.708  1.00  0.00           O
ATOM    472  N   PRO X  30     147.538 130.461 192.824  1.00  0.00           N
ATOM    473  CD  PRO X  30     147.419 131.834 192.637  1.00  0.00           C
ATOM    474  HD2 PRO X  30     148.104 132.282 193.356  1.00  0.00           H
ATOM    475  HD3 PRO X  30     146.435 132.182 192.950  1.00  0.00           H
ATOM    476  CG  PRO X  30     147.777 132.300 191.208  1.00  0.00           C
ATOM    477  HG2 PRO X  30     148.331 133.237 191.247  1.00  0.00           H
ATOM    478  HG3 PRO X  30     146.941 132.335 190.510  1.00  0.00           H
ATOM    479  CB  PRO X  30     148.595 131.178 190.757  1.00  0.00           C
ATOM    480  HB2 PRO X  30     149.641 131.356 191.005  1.00  0.00           H
ATOM    481  HB3 PRO X  30     148.583 131.018 189.679  1.00  0.00           H
ATOM    482  CA  PRO X  30     148.142 129.947 191.588  1.00  0.00           C
ATOM    483  HA  PRO X  30     147.418 129.360 191.022  1.00  0.00           H
ATOM    484  C   PRO X  30     149.384 129.093 191.834  1.00  0.00           C
ATOM    485  O   PRO X  30     150.091 129.328 192.826  1.00  0.00           O
ATOM    486  N   PRO X  31     149.748 128.073 190.996  1.00  0.00           N
ATOM    487  CD  PRO X  31     149.423 127.717 189.648  1.00  0.00           C
ATOM    488  HD2 PRO X  31     149.719 128.515 188.968  1.00  0.00           H
ATOM    489  HD3 PRO X  31     148.362 127.468 189.657  1.00  0.00           H
ATOM    490  CG  PRO X  31     149.987 126.409 189.221  1.00  0.00           C
ATOM    491  HG2 PRO X  31     150.780 126.533 188.484  1.00  0.00           H
ATOM    492  HG3 PRO X  31     149.191 125.716 188.947  1.00  0.00           H
ATOM    493  CB  PRO X  31     150.620 125.962 190.566  1.00  0.00           C
ATOM    494  HB2 PRO X  31     151.506 125.375 190.325  1.00  0.00           H
ATOM    495  HB3 PRO X  31     149.879 125.409 191.144  1.00  0.00           H
ATOM    496  CA  PRO X  31     150.934 127.304 191.340  1.00  0.00           C
ATOM    497  HA  PRO X  31     150.965 127.156 192.420  1.00  0.00           H
ATOM    498  C   PRO X  31     152.264 127.826 190.822  1.00  0.00           C
ATOM    499  O   PRO X  31     152.227 128.825 190.144  1.00  0.00           O
ATOM    500  N   GLY X  32     153.398 127.139 191.121  1.00  0.00           N
ATOM    501  H   GLY X  32     153.235 126.330 191.703  1.00  0.00           H
ATOM    502  CA  GLY X  32     154.674 127.364 190.489  1.00  0.00           C
ATOM    503  HA2 GLY X  32     154.730 128.333 189.992  1.00  0.00           H
ATOM    504  HA3 GLY X  32     155.448 127.321 191.255  1.00  0.00           H
ATOM    505  C   GLY X  32     155.036 126.313 189.378  1.00  0.00           C
ATOM    506  O   GLY X  32     155.344 125.154 189.803  1.00  0.00           O
ATOM    507  N   PRO X  33     155.082 126.684 188.074  1.00  0.00           N
ATOM    508  CD  PRO X  33     154.479 127.925 187.503  1.00  0.00           C
ATOM    509  HD2 PRO X  33     155.175 128.756 187.623  1.00  0.00           H
ATOM    510  HD3 PRO X  33     153.494 128.141 187.915  1.00  0.00           H
ATOM    511  CG  PRO X  33     154.336 127.681 186.005  1.00  0.00           C
ATOM    512  HG2 PRO X  33     155.132 128.166 185.440  1.00  0.00           H
ATOM    513  HG3 PRO X  33     153.346 128.030 185.714  1.00  0.00           H
ATOM    514  CB  PRO X  33     154.348 126.141 185.852  1.00  0.00           C
ATOM    515  HB2 PRO X  33     154.688 125.799 184.875  1.00  0.00           H
ATOM    516  HB3 PRO X  33     153.319 125.833 186.036  1.00  0.00           H
ATOM    517  CA  PRO X  33     155.185 125.705 187.045  1.00  0.00           C
ATOM    518  HA  PRO X  33     154.782 124.804 187.508  1.00  0.00           H
ATOM    519  C   PRO X  33     156.635 125.498 186.769  1.00  0.00           C
ATOM    520  O   PRO X  33     157.348 126.360 186.271  1.00  0.00           O
ATOM    521  N   THR X  34     157.062 124.227 187.026  1.00  0.00           N
ATOM    522  H   THR X  34     156.393 123.569 187.402  1.00  0.00           H
ATOM    523  CA  THR X  34     158.437 123.811 186.761  1.00  0.00           C
ATOM    524  HA  THR X  34     159.108 124.369 187.414  1.00  0.00           H
ATOM    525  CB  THR X  34     158.657 122.347 187.258  1.00  0.00           C
ATOM    526  HB  THR X  34     158.043 121.627 186.717  1.00  0.00           H
ATOM    527  CG2 THR X  34     160.040 121.793 187.044  1.00  0.00           C
ATOM    528 HG21 THR X  34     160.627 122.523 187.602  1.00  0.00           H
ATOM    529 HG22 THR X  34     160.389 121.696 186.016  1.00  0.00           H
ATOM    530 HG23 THR X  34     160.184 120.830 187.535  1.00  0.00           H
ATOM    531  OG1 THR X  34     158.254 122.313 188.628  1.00  0.00           O
ATOM    532  HG1 THR X  34     157.296 122.314 188.686  1.00  0.00           H
ATOM    533  C   THR X  34     158.775 123.937 185.299  1.00  0.00           C
ATOM    534  O   THR X  34     158.081 123.290 184.450  1.00  0.00           O
ATOM    535  N   PRO X  35     159.807 124.746 184.985  1.00  0.00           N
ATOM    536  CD  PRO X  35     160.641 125.396 185.995  1.00  0.00           C
ATOM    537  HD2 PRO X  35     161.175 124.710 186.652  1.00  0.00           H
ATOM    538  HD3 PRO X  35     159.917 125.980 186.564  1.00  0.00           H
ATOM    539  CG  PRO X  35     161.614 126.199 185.210  1.00  0.00           C
ATOM    540  HG2 PRO X  35     162.510 125.588 185.103  1.00  0.00           H
ATOM    541  HG3 PRO X  35     161.969 127.132 185.648  1.00  0.00           H
ATOM    542  CB  PRO X  35     161.005 126.398 183.835  1.00  0.00           C
ATOM    543  HB2 PRO X  35     161.744 126.503 183.040  1.00  0.00           H
ATOM    544  HB3 PRO X  35     160.355 127.250 183.631  1.00  0.00           H
ATOM    545  CA  PRO X  35     160.221 125.113 183.651  1.00  0.00           C
ATOM    546  HA  PRO X  35     159.337 125.393 183.078  1.00  0.00           H
ATOM    547  C   PRO X  35     161.055 124.111 182.914  1.00  0.00           C
ATOM    548  O   PRO X  35     161.177 124.159 181.681  1.00  0.00           O
ATOM    549  N   LEU X  36     161.632 123.189 183.707  1.00  0.00           N
ATOM    550  H   LEU X  36     161.230 123.217 184.633  1.00  0.00           H
ATOM    551  CA  LEU X  36     162.364 122.032 183.242  1.00  0.00           C
ATOM    552  HA  LEU X  36     161.802 121.682 182.376  1.00  0.00           H
ATOM    553  CB  LEU X  36     163.737 122.515 182.766  1.00  0.00           C
ATOM    554  HB2 LEU X  36     163.718 123.445 182.198  1.00  0.00           H
ATOM    555  HB3 LEU X  36     164.305 122.780 183.657  1.00  0.00           H
ATOM    556  CG  LEU X  36     164.525 121.545 181.858  1.00  0.00           C
ATOM    557  HG  LEU X  36     164.567 120.648 182.476  1.00  0.00           H
ATOM    558  CD1 LEU X  36     163.742 121.276 180.556  1.00  0.00           C
ATOM    559 HD11 LEU X  36     164.263 120.476 180.031  1.00  0.00           H
ATOM    560 HD12 LEU X  36     163.790 122.125 179.875  1.00  0.00           H
ATOM    561 HD13 LEU X  36     162.683 121.053 180.685  1.00  0.00           H
ATOM    562  CD2 LEU X  36     165.966 122.084 181.696  1.00  0.00           C
ATOM    563 HD21 LEU X  36     165.941 122.990 181.090  1.00  0.00           H
ATOM    564 HD22 LEU X  36     166.332 122.324 182.694  1.00  0.00           H
ATOM    565 HD23 LEU X  36     166.644 121.351 181.259  1.00  0.00           H
ATOM    566  C   LEU X  36     162.494 121.057 184.397  1.00  0.00           C
ATOM    567  O   LEU X  36     162.904 121.497 185.491  1.00  0.00           O
ATOM    568  N   PRO X  37     162.193 119.777 184.201  1.00  0.00           N
ATOM    569  CD  PRO X  37     161.883 119.109 182.933  1.00  0.00           C
ATOM    570  HD2 PRO X  37     162.804 118.765 182.460  1.00  0.00           H
ATOM    571  HD3 PRO X  37     161.356 119.677 182.166  1.00  0.00           H
ATOM    572  CG  PRO X  37     161.084 117.903 183.399  1.00  0.00           C
ATOM    573  HG2 PRO X  37     161.372 117.163 182.652  1.00  0.00           H
ATOM    574  HG3 PRO X  37     160.012 118.088 183.337  1.00  0.00           H
ATOM    575  CB  PRO X  37     161.578 117.518 184.761  1.00  0.00           C
ATOM    576  HB2 PRO X  37     162.401 116.804 184.779  1.00  0.00           H
ATOM    577  HB3 PRO X  37     160.800 117.143 185.426  1.00  0.00           H
ATOM    578  CA  PRO X  37     162.074 118.875 185.358  1.00  0.00           C
ATOM    579  HA  PRO X  37     161.250 119.220 185.982  1.00  0.00           H
ATOM    580  C   PRO X  37     163.323 118.757 186.202  1.00  0.00           C
ATOM    581  O   PRO X  37     163.220 118.541 187.417  1.00  0.00           O
ATOM    582  N   VAL X  38     164.534 118.952 185.650  1.00  0.00           N
ATOM    583  H   VAL X  38     164.615 119.260 184.691  1.00  0.00           H
ATOM    584  CA  VAL X  38     165.785 118.646 186.348  1.00  0.00           C
ATOM    585  HA  VAL X  38     165.724 117.593 186.624  1.00  0.00           H
ATOM    586  CB  VAL X  38     167.016 118.820 185.434  1.00  0.00           C
ATOM    587  HB  VAL X  38     167.875 118.420 185.972  1.00  0.00           H
ATOM    588  CG1 VAL X  38     166.961 118.063 184.084  1.00  0.00           C
ATOM    589 HG11 VAL X  38     168.007 117.839 183.873  1.00  0.00           H
ATOM    590 HG12 VAL X  38     166.491 117.096 184.267  1.00  0.00           H
ATOM    591 HG13 VAL X  38     166.425 118.599 183.301  1.00  0.00           H
ATOM    592  CG2 VAL X  38     167.226 120.346 185.131  1.00  0.00           C
ATOM    593 HG21 VAL X  38     167.808 120.468 184.218  1.00  0.00           H
ATOM    594 HG22 VAL X  38     167.840 120.698 185.960  1.00  0.00           H
ATOM    595 HG23 VAL X  38     166.272 120.874 185.139  1.00  0.00           H
ATOM    596  C   VAL X  38     166.045 119.409 187.696  1.00  0.00           C
ATOM    597  O   VAL X  38     166.618 118.815 188.618  1.00  0.00           O
ATOM    598  N   ILE X  39     165.532 120.612 187.784  1.00  0.00           N
ATOM    599  H   ILE X  39     165.021 120.907 186.964  1.00  0.00           H
ATOM    600  CA  ILE X  39     165.601 121.498 188.916  1.00  0.00           C
ATOM    601  HA  ILE X  39     166.622 121.309 189.249  1.00  0.00           H
ATOM    602  CB  ILE X  39     165.477 122.986 188.523  1.00  0.00           C
ATOM    603  HB  ILE X  39     165.692 123.472 189.474  1.00  0.00           H
ATOM    604  CG2 ILE X  39     166.520 123.351 187.408  1.00  0.00           C
ATOM    605 HG21 ILE X  39     166.162 122.944 186.462  1.00  0.00           H
ATOM    606 HG22 ILE X  39     167.522 123.029 187.690  1.00  0.00           H
ATOM    607 HG23 ILE X  39     166.505 124.431 187.259  1.00  0.00           H
ATOM    608  CG1 ILE X  39     164.018 123.290 188.160  1.00  0.00           C
ATOM    609 HG12 ILE X  39     163.862 123.223 187.083  1.00  0.00           H
ATOM    610 HG13 ILE X  39     163.375 122.515 188.577  1.00  0.00           H
ATOM    611  CD1 ILE X  39     163.570 124.672 188.681  1.00  0.00           C
ATOM    612 HD11 ILE X  39     163.773 125.497 187.999  1.00  0.00           H
ATOM    613 HD12 ILE X  39     164.119 124.953 189.580  1.00  0.00           H
ATOM    614 HD13 ILE X  39     162.492 124.693 188.839  1.00  0.00           H
ATOM    615  C   ILE X  39     164.815 120.967 190.119  1.00  0.00           C
ATOM    616  O   ILE X  39     164.739 121.500 191.236  1.00  0.00           O
ATOM    617  N   GLY X  40     164.054 119.939 189.824  1.00  0.00           N
ATOM    618  H   GLY X  40     164.104 119.646 188.859  1.00  0.00           H
ATOM    619  CA  GLY X  40     163.438 119.062 190.840  1.00  0.00           C
ATOM    620  HA2 GLY X  40     163.169 118.110 190.382  1.00  0.00           H
ATOM    621  HA3 GLY X  40     164.088 118.756 191.659  1.00  0.00           H
ATOM    622  C   GLY X  40     162.178 119.538 191.525  1.00  0.00           C
ATOM    623  O   GLY X  40     161.528 120.464 191.027  1.00  0.00           O
ATOM    624  N   ASN X  41     161.717 118.999 192.679  1.00  0.00           N
ATOM    625  H   ASN X  41     162.200 118.209 193.085  1.00  0.00           H
ATOM    626  CA  ASN X  41     160.430 119.218 193.335  1.00  0.00           C
ATOM    627  HA  ASN X  41     159.615 119.075 192.626  1.00  0.00           H
ATOM    628  CB  ASN X  41     160.374 118.087 194.416  1.00  0.00           C
ATOM    629  HB2 ASN X  41     161.285 118.101 195.014  1.00  0.00           H
ATOM    630  HB3 ASN X  41     159.547 118.181 195.119  1.00  0.00           H
ATOM    631  CG  ASN X  41     160.313 116.678 193.816  1.00  0.00           C
ATOM    632  OD1 ASN X  41     161.025 115.847 194.397  1.00  0.00           O
ATOM    633  ND2 ASN X  41     159.793 116.412 192.612  1.00  0.00           N
ATOM    634 HD21 ASN X  41     159.259 117.113 192.119  1.00  0.00           H
ATOM    635 HD22 ASN X  41     160.147 115.616 192.100  1.00  0.00           H
ATOM    636  C   ASN X  41     160.213 120.578 194.070  1.00  0.00           C
ATOM    637  O   ASN X  41     159.154 120.884 194.603  1.00  0.00           O
ATOM    638  N   ILE X  42     161.226 121.521 193.969  1.00  0.00           N
ATOM    639  H   ILE X  42     161.983 121.265 193.350  1.00  0.00           H
ATOM    640  CA  ILE X  42     161.373 122.809 194.752  1.00  0.00           C
ATOM    641  HA  ILE X  42     161.323 122.542 195.807  1.00  0.00           H
ATOM    642  CB  ILE X  42     162.819 123.338 194.375  1.00  0.00           C
ATOM    643  HB  ILE X  42     163.445 122.449 194.300  1.00  0.00           H
ATOM    644  CG2 ILE X  42     162.898 123.884 192.890  1.00  0.00           C
ATOM    645 HG21 ILE X  42     162.428 124.867 192.864  1.00  0.00           H
ATOM    646 HG22 ILE X  42     162.394 123.255 192.156  1.00  0.00           H
ATOM    647 HG23 ILE X  42     163.925 123.982 192.538  1.00  0.00           H
ATOM    648  CG1 ILE X  42     163.469 124.293 195.444  1.00  0.00           C
ATOM    649 HG12 ILE X  42     162.824 125.145 195.655  1.00  0.00           H
ATOM    650 HG13 ILE X  42     163.490 123.727 196.376  1.00  0.00           H
ATOM    651  CD1 ILE X  42     164.922 124.755 195.063  1.00  0.00           C
ATOM    652 HD11 ILE X  42     165.244 125.433 195.854  1.00  0.00           H
ATOM    653 HD12 ILE X  42     164.958 125.382 194.172  1.00  0.00           H
ATOM    654 HD13 ILE X  42     165.610 123.919 194.939  1.00  0.00           H
ATOM    655  C   ILE X  42     160.292 123.824 194.496  1.00  0.00           C
ATOM    656  O   ILE X  42     160.265 124.762 195.240  1.00  0.00           O
ATOM    657  N   LEU X  43     159.460 123.672 193.402  1.00  0.00           N
ATOM    658  H   LEU X  43     159.734 122.931 192.773  1.00  0.00           H
ATOM    659  CA  LEU X  43     158.246 124.423 193.067  1.00  0.00           C
ATOM    660  HA  LEU X  43     158.254 125.240 193.790  1.00  0.00           H
ATOM    661  CB  LEU X  43     158.412 125.005 191.656  1.00  0.00           C
ATOM    662  HB2 LEU X  43     158.252 124.182 190.960  1.00  0.00           H
ATOM    663  HB3 LEU X  43     157.613 125.706 191.415  1.00  0.00           H
ATOM    664  CG  LEU X  43     159.734 125.687 191.206  1.00  0.00           C
ATOM    665  HG  LEU X  43     160.462 124.876 191.245  1.00  0.00           H
ATOM    666  CD1 LEU X  43     159.710 126.351 189.830  1.00  0.00           C
ATOM    667 HD11 LEU X  43     159.366 125.571 189.150  1.00  0.00           H
ATOM    668 HD12 LEU X  43     160.724 126.661 189.577  1.00  0.00           H
ATOM    669 HD13 LEU X  43     158.958 127.135 189.746  1.00  0.00           H
ATOM    670  CD2 LEU X  43     160.065 126.838 192.194  1.00  0.00           C
ATOM    671 HD21 LEU X  43     159.214 127.519 192.211  1.00  0.00           H
ATOM    672 HD22 LEU X  43     160.181 126.495 193.222  1.00  0.00           H
ATOM    673 HD23 LEU X  43     161.013 127.339 191.995  1.00  0.00           H
ATOM    674  C   LEU X  43     156.943 123.580 193.182  1.00  0.00           C
ATOM    675  O   LEU X  43     155.839 124.130 193.244  1.00  0.00           O
ATOM    676  N   GLN X  44     157.020 122.302 193.102  1.00  0.00           N
ATOM    677  H   GLN X  44     157.941 121.941 192.902  1.00  0.00           H
ATOM    678  CA  GLN X  44     155.866 121.389 193.017  1.00  0.00           C
ATOM    679  HA  GLN X  44     155.083 121.827 192.399  1.00  0.00           H
ATOM    680  CB  GLN X  44     156.247 119.929 192.478  1.00  0.00           C
ATOM    681  HB2 GLN X  44     157.108 119.541 193.024  1.00  0.00           H
ATOM    682  HB3 GLN X  44     155.408 119.331 192.834  1.00  0.00           H
ATOM    683  CG  GLN X  44     156.425 119.756 190.993  1.00  0.00           C
ATOM    684  HG2 GLN X  44     155.495 119.353 190.592  1.00  0.00           H
ATOM    685  HG3 GLN X  44     156.694 120.738 190.602  1.00  0.00           H
ATOM    686  CD  GLN X  44     157.516 118.850 190.536  1.00  0.00           C
ATOM    687  OE1 GLN X  44     157.858 117.835 191.083  1.00  0.00           O
ATOM    688  NE2 GLN X  44     158.195 119.179 189.485  1.00  0.00           N
ATOM    689 HE21 GLN X  44     158.918 118.520 189.232  1.00  0.00           H
ATOM    690 HE22 GLN X  44     158.173 120.115 189.106  1.00  0.00           H
ATOM    691  C   GLN X  44     155.165 121.260 194.431  1.00  0.00           C
ATOM    692  O   GLN X  44     153.939 121.080 194.516  1.00  0.00           O
ATOM    693  N   ILE X  45     155.933 121.398 195.513  1.00  0.00           N
ATOM    694  H   ILE X  45     156.931 121.460 195.370  1.00  0.00           H
ATOM    695  CA  ILE X  45     155.520 121.645 196.839  1.00  0.00           C
ATOM    696  HA  ILE X  45     154.516 121.245 196.982  1.00  0.00           H
ATOM    697  CB  ILE X  45     156.459 120.971 197.877  1.00  0.00           C
ATOM    698  HB  ILE X  45     156.078 121.221 198.867  1.00  0.00           H
ATOM    699  CG2 ILE X  45     156.375 119.408 197.866  1.00  0.00           C
ATOM    700 HG21 ILE X  45     155.390 118.986 198.065  1.00  0.00           H
ATOM    701 HG22 ILE X  45     156.954 118.949 198.667  1.00  0.00           H
ATOM    702 HG23 ILE X  45     156.615 119.026 196.873  1.00  0.00           H
ATOM    703  CG1 ILE X  45     157.877 121.544 197.807  1.00  0.00           C
ATOM    704 HG12 ILE X  45     158.418 121.086 196.979  1.00  0.00           H
ATOM    705 HG13 ILE X  45     157.846 122.632 197.746  1.00  0.00           H
ATOM    706  CD1 ILE X  45     158.589 121.151 199.078  1.00  0.00           C
ATOM    707 HD11 ILE X  45     159.612 121.527 199.097  1.00  0.00           H
ATOM    708 HD12 ILE X  45     158.686 120.070 199.174  1.00  0.00           H
ATOM    709 HD13 ILE X  45     158.161 121.680 199.930  1.00  0.00           H
ATOM    710  C   ILE X  45     155.338 123.199 197.193  1.00  0.00           C
ATOM    711  O   ILE X  45     155.838 124.110 196.536  1.00  0.00           O
ATOM    712  N   GLY X  46     154.641 123.388 198.267  1.00  0.00           N
ATOM    713  H   GLY X  46     154.185 122.564 198.632  1.00  0.00           H
ATOM    714  CA  GLY X  46     154.520 124.680 198.994  1.00  0.00           C
ATOM    715  HA2 GLY X  46     154.328 125.495 198.297  1.00  0.00           H
ATOM    716  HA3 GLY X  46     153.686 124.680 199.696  1.00  0.00           H
ATOM    717  C   GLY X  46     155.754 124.947 199.898  1.00  0.00           C
ATOM    718  O   GLY X  46     155.616 125.001 201.098  1.00  0.00           O
ATOM    719  N   ILE X  47     156.868 125.121 199.307  1.00  0.00           N
ATOM    720  H   ILE X  47     156.756 125.093 198.304  1.00  0.00           H
ATOM    721  CA  ILE X  47     158.151 125.677 199.738  1.00  0.00           C
ATOM    722  HA  ILE X  47     158.470 124.973 200.506  1.00  0.00           H
ATOM    723  CB  ILE X  47     159.087 125.628 198.504  1.00  0.00           C
ATOM    724  HB  ILE X  47     159.033 124.605 198.133  1.00  0.00           H
ATOM    725  CG2 ILE X  47     158.472 126.567 197.475  1.00  0.00           C
ATOM    726 HG21 ILE X  47     158.965 126.502 196.505  1.00  0.00           H
ATOM    727 HG22 ILE X  47     158.467 127.590 197.852  1.00  0.00           H
ATOM    728 HG23 ILE X  47     157.433 126.391 197.197  1.00  0.00           H
ATOM    729  CG1 ILE X  47     160.552 126.011 198.765  1.00  0.00           C
ATOM    730 HG12 ILE X  47     161.101 125.869 197.834  1.00  0.00           H
ATOM    731 HG13 ILE X  47     160.728 127.054 199.030  1.00  0.00           H
ATOM    732  CD1 ILE X  47     161.116 125.022 199.830  1.00  0.00           C
ATOM    733 HD11 ILE X  47     160.601 125.180 200.777  1.00  0.00           H
ATOM    734 HD12 ILE X  47     162.160 125.330 199.900  1.00  0.00           H
ATOM    735 HD13 ILE X  47     161.064 123.965 199.572  1.00  0.00           H
ATOM    736  C   ILE X  47     158.088 126.924 200.557  1.00  0.00           C
ATOM    737  O   ILE X  47     159.095 127.282 201.146  1.00  0.00           O
ATOM    738  N   LYS X  48     156.924 127.619 200.547  1.00  0.00           N
ATOM    739  H   LYS X  48     156.187 127.137 200.051  1.00  0.00           H
ATOM    740  CA  LYS X  48     156.560 128.750 201.416  1.00  0.00           C
ATOM    741  HA  LYS X  48     157.238 129.583 201.229  1.00  0.00           H
ATOM    742  CB  LYS X  48     155.105 129.128 201.049  1.00  0.00           C
ATOM    743  HB2 LYS X  48     155.080 129.297 199.972  1.00  0.00           H
ATOM    744  HB3 LYS X  48     154.369 128.374 201.329  1.00  0.00           H
ATOM    745  CG  LYS X  48     154.710 130.510 201.660  1.00  0.00           C
ATOM    746  HG2 LYS X  48     155.520 131.240 201.673  1.00  0.00           H
ATOM    747  HG3 LYS X  48     153.975 130.901 200.956  1.00  0.00           H
ATOM    748  CD  LYS X  48     154.063 130.294 203.040  1.00  0.00           C
ATOM    749  HD2 LYS X  48     153.155 129.761 202.760  1.00  0.00           H
ATOM    750  HD3 LYS X  48     154.564 129.550 203.660  1.00  0.00           H
ATOM    751  CE  LYS X  48     153.820 131.610 203.838  1.00  0.00           C
ATOM    752  HE2 LYS X  48     153.340 131.268 204.755  1.00  0.00           H
ATOM    753  HE3 LYS X  48     154.749 132.142 204.039  1.00  0.00           H
ATOM    754  NZ  LYS X  48     152.891 132.595 203.171  1.00  0.00           N
ATOM    755  HZ1 LYS X  48     151.975 132.170 203.153  1.00  0.00           H
ATOM    756  HZ2 LYS X  48     153.214 132.854 202.250  1.00  0.00           H
ATOM    757  HZ3 LYS X  48     152.938 133.458 203.693  1.00  0.00           H
ATOM    758  C   LYS X  48     156.813 128.392 202.871  1.00  0.00           C
ATOM    759  O   LYS X  48     156.960 129.308 203.680  1.00  0.00           O
ATOM    760  N   ASP X  49     156.686 127.071 203.155  1.00  0.00           N
ATOM    761  H   ASP X  49     156.527 126.421 202.399  1.00  0.00           H
ATOM    762  CA  ASP X  49     156.512 126.433 204.463  1.00  0.00           C
ATOM    763  HA  ASP X  49     157.235 126.967 205.080  1.00  0.00           H
ATOM    764  CB  ASP X  49     155.154 126.772 205.118  1.00  0.00           C
ATOM    765  HB2 ASP X  49     155.159 127.860 205.179  1.00  0.00           H
ATOM    766  HB3 ASP X  49     154.298 126.380 204.568  1.00  0.00           H
ATOM    767  CG  ASP X  49     155.008 126.426 206.586  1.00  0.00           C
ATOM    768  OD1 ASP X  49     154.310 127.201 207.329  1.00  0.00           O
ATOM    769  OD2 ASP X  49     155.548 125.435 207.099  1.00  0.00           O
ATOM    770  C   ASP X  49     156.774 124.957 204.522  1.00  0.00           C
ATOM    771  O   ASP X  49     155.832 124.142 204.542  1.00  0.00           O
ATOM    772  N   ILE X  50     158.034 124.660 204.377  1.00  0.00           N
ATOM    773  H   ILE X  50     158.627 125.474 204.297  1.00  0.00           H
ATOM    774  CA  ILE X  50     158.629 123.352 204.154  1.00  0.00           C
ATOM    775  HA  ILE X  50     158.266 122.995 203.191  1.00  0.00           H
ATOM    776  CB  ILE X  50     160.173 123.549 204.108  1.00  0.00           C
ATOM    777  HB  ILE X  50     160.546 124.289 203.401  1.00  0.00           H
ATOM    778  CG2 ILE X  50     160.663 124.112 205.493  1.00  0.00           C
ATOM    779 HG21 ILE X  50     160.350 125.143 205.662  1.00  0.00           H
ATOM    780 HG22 ILE X  50     161.747 124.010 205.445  1.00  0.00           H
ATOM    781 HG23 ILE X  50     160.319 123.476 206.309  1.00  0.00           H
ATOM    782  CG1 ILE X  50     160.899 122.177 203.749  1.00  0.00           C
ATOM    783 HG12 ILE X  50     161.964 122.375 203.870  1.00  0.00           H
ATOM    784 HG13 ILE X  50     160.569 121.326 204.345  1.00  0.00           H
ATOM    785  CD1 ILE X  50     160.850 121.797 202.222  1.00  0.00           C
ATOM    786 HD11 ILE X  50     161.656 121.244 201.741  1.00  0.00           H
ATOM    787 HD12 ILE X  50     160.702 122.695 201.622  1.00  0.00           H
ATOM    788 HD13 ILE X  50     159.997 121.138 202.059  1.00  0.00           H
ATOM    789  C   ILE X  50     158.144 122.338 205.252  1.00  0.00           C
ATOM    790  O   ILE X  50     157.830 121.195 204.968  1.00  0.00           O
ATOM    791  N   SER X  51     157.935 122.826 206.528  1.00  0.00           N
ATOM    792  H   SER X  51     158.055 123.813 206.706  1.00  0.00           H
ATOM    793  CA  SER X  51     157.361 121.984 207.612  1.00  0.00           C
ATOM    794  HA  SER X  51     157.966 121.083 207.516  1.00  0.00           H
ATOM    795  CB  SER X  51     157.620 122.700 208.947  1.00  0.00           C
ATOM    796  HB2 SER X  51     158.625 123.114 208.859  1.00  0.00           H
ATOM    797  HB3 SER X  51     156.799 123.367 209.211  1.00  0.00           H
ATOM    798  OG  SER X  51     157.632 121.539 209.779  1.00  0.00           O
ATOM    799  HG  SER X  51     156.826 121.547 210.300  1.00  0.00           H
ATOM    800  C   SER X  51     155.909 121.695 207.464  1.00  0.00           C
ATOM    801  O   SER X  51     155.528 120.553 207.604  1.00  0.00           O
ATOM    802  N   LYS X  52     155.049 122.575 206.937  1.00  0.00           N
ATOM    803  H   LYS X  52     155.402 123.507 206.773  1.00  0.00           H
ATOM    804  CA  LYS X  52     153.758 122.182 206.482  1.00  0.00           C
ATOM    805  HA  LYS X  52     153.181 121.617 207.214  1.00  0.00           H
ATOM    806  CB  LYS X  52     152.876 123.435 206.328  1.00  0.00           C
ATOM    807  HB2 LYS X  52     152.608 123.832 207.307  1.00  0.00           H
ATOM    808  HB3 LYS X  52     153.403 124.219 205.785  1.00  0.00           H
ATOM    809  CG  LYS X  52     151.525 123.210 205.536  1.00  0.00           C
ATOM    810  HG2 LYS X  52     151.660 122.664 204.603  1.00  0.00           H
ATOM    811  HG3 LYS X  52     150.806 122.756 206.219  1.00  0.00           H
ATOM    812  CD  LYS X  52     151.029 124.569 205.128  1.00  0.00           C
ATOM    813  HD2 LYS X  52     151.780 125.161 204.606  1.00  0.00           H
ATOM    814  HD3 LYS X  52     150.117 124.375 204.564  1.00  0.00           H
ATOM    815  CE  LYS X  52     150.786 125.427 206.348  1.00  0.00           C
ATOM    816  HE2 LYS X  52     150.340 124.826 207.141  1.00  0.00           H
ATOM    817  HE3 LYS X  52     151.647 125.888 206.831  1.00  0.00           H
ATOM    818  NZ  LYS X  52     149.779 126.481 205.982  1.00  0.00           N
ATOM    819  HZ1 LYS X  52     149.710 127.163 206.723  1.00  0.00           H
ATOM    820  HZ2 LYS X  52     148.861 126.058 205.977  1.00  0.00           H
ATOM    821  HZ3 LYS X  52     150.071 126.992 205.161  1.00  0.00           H
ATOM    822  C   LYS X  52     153.737 121.313 205.201  1.00  0.00           C
ATOM    823  O   LYS X  52     152.959 120.385 205.106  1.00  0.00           O
ATOM    824  N   SER X  53     154.770 121.408 204.349  1.00  0.00           N
ATOM    825  H   SER X  53     155.394 122.182 204.526  1.00  0.00           H
ATOM    826  CA  SER X  53     155.020 120.414 203.343  1.00  0.00           C
ATOM    827  HA  SER X  53     154.094 120.256 202.789  1.00  0.00           H
ATOM    828  CB  SER X  53     156.110 120.903 202.358  1.00  0.00           C
ATOM    829  HB2 SER X  53     156.035 121.982 202.223  1.00  0.00           H
ATOM    830  HB3 SER X  53     157.085 120.865 202.845  1.00  0.00           H
ATOM    831  OG  SER X  53     156.293 120.186 201.182  1.00  0.00           O
ATOM    832  HG  SER X  53     155.614 120.407 200.541  1.00  0.00           H
ATOM    833  C   SER X  53     155.247 119.005 203.942  1.00  0.00           C
ATOM    834  O   SER X  53     154.485 118.123 203.556  1.00  0.00           O
ATOM    835  N   LEU X  54     156.288 118.874 204.784  1.00  0.00           N
ATOM    836  H   LEU X  54     156.784 119.718 205.033  1.00  0.00           H
ATOM    837  CA  LEU X  54     156.798 117.568 205.156  1.00  0.00           C
ATOM    838  HA  LEU X  54     157.018 116.967 204.274  1.00  0.00           H
ATOM    839  CB  LEU X  54     158.063 117.671 206.037  1.00  0.00           C
ATOM    840  HB2 LEU X  54     157.759 118.319 206.858  1.00  0.00           H
ATOM    841  HB3 LEU X  54     158.252 116.645 206.353  1.00  0.00           H
ATOM    842  CG  LEU X  54     159.317 118.246 205.310  1.00  0.00           C
ATOM    843  HG  LEU X  54     159.352 119.290 205.622  1.00  0.00           H
ATOM    844  CD1 LEU X  54     160.597 117.704 205.905  1.00  0.00           C
ATOM    845 HD11 LEU X  54     161.456 118.375 205.904  1.00  0.00           H
ATOM    846 HD12 LEU X  54     161.058 116.865 205.383  1.00  0.00           H
ATOM    847 HD13 LEU X  54     160.548 117.404 206.952  1.00  0.00           H
ATOM    848  CD2 LEU X  54     159.482 118.108 203.852  1.00  0.00           C
ATOM    849 HD21 LEU X  54     158.745 118.804 203.452  1.00  0.00           H
ATOM    850 HD22 LEU X  54     160.469 118.371 203.470  1.00  0.00           H
ATOM    851 HD23 LEU X  54     159.265 117.081 203.558  1.00  0.00           H
ATOM    852  C   LEU X  54     155.786 116.795 206.028  1.00  0.00           C
ATOM    853  O   LEU X  54     155.490 115.649 205.782  1.00  0.00           O
ATOM    854  N   THR X  55     155.271 117.442 207.052  1.00  0.00           N
ATOM    855  H   THR X  55     155.705 118.324 207.283  1.00  0.00           H
ATOM    856  CA  THR X  55     154.162 116.969 207.886  1.00  0.00           C
ATOM    857  HA  THR X  55     154.391 116.004 208.338  1.00  0.00           H
ATOM    858  CB  THR X  55     153.855 117.908 209.039  1.00  0.00           C
ATOM    859  HB  THR X  55     152.976 117.533 209.563  1.00  0.00           H
ATOM    860  CG2 THR X  55     154.987 118.010 210.054  1.00  0.00           C
ATOM    861 HG21 THR X  55     155.169 116.976 210.350  1.00  0.00           H
ATOM    862 HG22 THR X  55     154.739 118.515 210.987  1.00  0.00           H
ATOM    863 HG23 THR X  55     155.828 118.503 209.567  1.00  0.00           H
ATOM    864  OG1 THR X  55     153.548 119.169 208.418  1.00  0.00           O
ATOM    865  HG1 THR X  55     154.365 119.671 208.387  1.00  0.00           H
ATOM    866  C   THR X  55     152.915 116.508 207.127  1.00  0.00           C
ATOM    867  O   THR X  55     151.893 116.027 207.728  1.00  0.00           O
ATOM    868  N   ASN X  56     152.900 116.685 205.771  1.00  0.00           N
ATOM    869  H   ASN X  56     153.744 117.093 205.395  1.00  0.00           H
ATOM    870  CA  ASN X  56     151.876 116.155 204.877  1.00  0.00           C
ATOM    871  HA  ASN X  56     151.225 115.464 205.413  1.00  0.00           H
ATOM    872  CB  ASN X  56     150.988 117.292 204.351  1.00  0.00           C
ATOM    873  HB2 ASN X  56     151.513 118.091 203.828  1.00  0.00           H
ATOM    874  HB3 ASN X  56     150.258 116.782 203.722  1.00  0.00           H
ATOM    875  CG  ASN X  56     150.238 117.898 205.455  1.00  0.00           C
ATOM    876  OD1 ASN X  56     149.122 117.580 205.755  1.00  0.00           O
ATOM    877  ND2 ASN X  56     150.822 118.868 206.150  1.00  0.00           N
ATOM    878 HD21 ASN X  56     151.656 119.310 205.792  1.00  0.00           H
ATOM    879 HD22 ASN X  56     150.250 119.289 206.868  1.00  0.00           H
ATOM    880  C   ASN X  56     152.326 115.243 203.699  1.00  0.00           C
ATOM    881  O   ASN X  56     151.588 114.358 203.334  1.00  0.00           O
ATOM    882  N   LEU X  57     153.644 115.239 203.355  1.00  0.00           N
ATOM    883  H   LEU X  57     154.158 116.021 203.736  1.00  0.00           H
ATOM    884  CA  LEU X  57     154.274 114.235 202.492  1.00  0.00           C
ATOM    885  HA  LEU X  57     153.616 114.128 201.630  1.00  0.00           H
ATOM    886  CB  LEU X  57     155.624 114.602 202.050  1.00  0.00           C
ATOM    887  HB2 LEU X  57     156.193 114.787 202.961  1.00  0.00           H
ATOM    888  HB3 LEU X  57     156.078 113.785 201.490  1.00  0.00           H
ATOM    889  CG  LEU X  57     155.625 115.880 201.144  1.00  0.00           C
ATOM    890  HG  LEU X  57     154.784 116.512 201.429  1.00  0.00           H
ATOM    891  CD1 LEU X  57     156.889 116.768 201.303  1.00  0.00           C
ATOM    892 HD11 LEU X  57     157.819 116.200 201.303  1.00  0.00           H
ATOM    893 HD12 LEU X  57     156.777 117.335 202.227  1.00  0.00           H
ATOM    894 HD13 LEU X  57     156.906 117.567 200.562  1.00  0.00           H
ATOM    895  CD2 LEU X  57     155.421 115.424 199.668  1.00  0.00           C
ATOM    896 HD21 LEU X  57     155.499 116.245 198.954  1.00  0.00           H
ATOM    897 HD22 LEU X  57     156.261 114.811 199.342  1.00  0.00           H
ATOM    898 HD23 LEU X  57     154.503 114.836 199.648  1.00  0.00           H
ATOM    899  C   LEU X  57     154.322 112.886 203.245  1.00  0.00           C
ATOM    900  O   LEU X  57     154.299 111.831 202.588  1.00  0.00           O
ATOM    901  N   SER X  58     154.346 112.931 204.584  1.00  0.00           N
ATOM    902  H   SER X  58     154.317 113.786 205.121  1.00  0.00           H
ATOM    903  CA  SER X  58     154.194 111.700 205.392  1.00  0.00           C
ATOM    904  HA  SER X  58     154.889 110.975 204.967  1.00  0.00           H
ATOM    905  CB  SER X  58     154.673 111.941 206.849  1.00  0.00           C
ATOM    906  HB2 SER X  58     154.308 111.077 207.403  1.00  0.00           H
ATOM    907  HB3 SER X  58     155.753 112.065 206.926  1.00  0.00           H
ATOM    908  OG  SER X  58     154.048 113.084 207.417  1.00  0.00           O
ATOM    909  HG  SER X  58     154.392 113.285 208.290  1.00  0.00           H
ATOM    910  C   SER X  58     152.752 111.104 205.217  1.00  0.00           C
ATOM    911  O   SER X  58     152.579 109.856 205.306  1.00  0.00           O
ATOM    912  N   LYS X  59     151.719 111.830 204.815  1.00  0.00           N
ATOM    913  H   LYS X  59     151.768 112.796 204.523  1.00  0.00           H
ATOM    914  CA  LYS X  59     150.485 111.121 204.483  1.00  0.00           C
ATOM    915  HA  LYS X  59     150.305 110.319 205.199  1.00  0.00           H
ATOM    916  CB  LYS X  59     149.307 112.095 204.469  1.00  0.00           C
ATOM    917  HB2 LYS X  59     149.442 112.824 203.670  1.00  0.00           H
ATOM    918  HB3 LYS X  59     148.365 111.552 204.398  1.00  0.00           H
ATOM    919  CG  LYS X  59     149.223 112.845 205.858  1.00  0.00           C
ATOM    920  HG2 LYS X  59     149.011 112.103 206.628  1.00  0.00           H
ATOM    921  HG3 LYS X  59     150.198 113.276 206.087  1.00  0.00           H
ATOM    922  CD  LYS X  59     148.209 113.922 205.906  1.00  0.00           C
ATOM    923  HD2 LYS X  59     148.335 114.626 205.084  1.00  0.00           H
ATOM    924  HD3 LYS X  59     147.175 113.577 205.873  1.00  0.00           H
ATOM    925  CE  LYS X  59     148.482 114.671 207.193  1.00  0.00           C
ATOM    926  HE2 LYS X  59     148.326 113.994 208.033  1.00  0.00           H
ATOM    927  HE3 LYS X  59     149.517 115.000 207.294  1.00  0.00           H
ATOM    928  NZ  LYS X  59     147.662 115.867 207.258  1.00  0.00           N
ATOM    929  HZ1 LYS X  59     148.008 116.404 208.039  1.00  0.00           H
ATOM    930  HZ2 LYS X  59     146.678 115.649 207.322  1.00  0.00           H
ATOM    931  HZ3 LYS X  59     147.919 116.536 206.547  1.00  0.00           H
ATOM    932  C   LYS X  59     150.497 110.458 203.143  1.00  0.00           C
ATOM    933  O   LYS X  59     149.772 109.513 202.936  1.00  0.00           O
ATOM    934  N   VAL X  60     151.231 111.015 202.180  1.00  0.00           N
ATOM    935  H   VAL X  60     151.857 111.796 202.317  1.00  0.00           H
ATOM    936  CA  VAL X  60     151.343 110.288 200.932  1.00  0.00           C
ATOM    937  HA  VAL X  60     150.311 110.042 200.682  1.00  0.00           H
ATOM    938  CB  VAL X  60     151.836 111.222 199.763  1.00  0.00           C
ATOM    939  HB  VAL X  60     152.861 111.539 199.953  1.00  0.00           H
ATOM    940  CG1 VAL X  60     151.758 110.583 198.409  1.00  0.00           C
ATOM    941 HG11 VAL X  60     152.425 109.721 198.439  1.00  0.00           H
ATOM    942 HG12 VAL X  60     150.763 110.197 198.187  1.00  0.00           H
ATOM    943 HG13 VAL X  60     152.144 111.264 197.651  1.00  0.00           H
ATOM    944  CG2 VAL X  60     150.985 112.537 199.756  1.00  0.00           C
ATOM    945 HG21 VAL X  60     151.372 113.251 199.029  1.00  0.00           H
ATOM    946 HG22 VAL X  60     151.043 112.997 200.742  1.00  0.00           H
ATOM    947 HG23 VAL X  60     149.911 112.369 199.678  1.00  0.00           H
ATOM    948  C   VAL X  60     152.224 108.984 200.934  1.00  0.00           C
ATOM    949  O   VAL X  60     151.671 107.898 200.785  1.00  0.00           O
ATOM    950  N   TYR X  61     153.545 109.116 201.233  1.00  0.00           N
ATOM    951  H   TYR X  61     153.911 110.021 201.494  1.00  0.00           H
ATOM    952  CA  TYR X  61     154.565 108.067 201.067  1.00  0.00           C
ATOM    953  HA  TYR X  61     154.114 107.232 200.532  1.00  0.00           H
ATOM    954  CB  TYR X  61     155.764 108.644 200.250  1.00  0.00           C
ATOM    955  HB2 TYR X  61     156.485 109.138 200.901  1.00  0.00           H
ATOM    956  HB3 TYR X  61     156.313 107.795 199.844  1.00  0.00           H
ATOM    957  CG  TYR X  61     155.430 109.614 199.155  1.00  0.00           C
ATOM    958  CD1 TYR X  61     154.974 109.115 197.917  1.00  0.00           C
ATOM    959  HD1 TYR X  61     154.963 108.040 197.809  1.00  0.00           H
ATOM    960  CE1 TYR X  61     154.654 110.042 196.891  1.00  0.00           C
ATOM    961  HE1 TYR X  61     154.258 109.726 195.937  1.00  0.00           H
ATOM    962  CZ  TYR X  61     154.744 111.365 197.080  1.00  0.00           C
ATOM    963  OH  TYR X  61     154.255 112.257 196.185  1.00  0.00           O
ATOM    964  HH  TYR X  61     154.462 113.172 196.387  1.00  0.00           H
ATOM    965  CE2 TYR X  61     155.225 111.849 198.283  1.00  0.00           C
ATOM    966  HE2 TYR X  61     155.224 112.912 198.474  1.00  0.00           H
ATOM    967  CD2 TYR X  61     155.545 111.022 199.370  1.00  0.00           C
ATOM    968  HD2 TYR X  61     155.981 111.412 200.277  1.00  0.00           H
ATOM    969  C   TYR X  61     155.106 107.393 202.363  1.00  0.00           C
ATOM    970  O   TYR X  61     156.069 106.615 202.270  1.00  0.00           O
ATOM    971  N   GLY X  62     154.446 107.670 203.471  1.00  0.00           N
ATOM    972  H   GLY X  62     153.748 108.400 203.448  1.00  0.00           H
ATOM    973  CA  GLY X  62     154.699 107.022 204.874  1.00  0.00           C
ATOM    974  HA2 GLY X  62     153.784 106.919 205.457  1.00  0.00           H
ATOM    975  HA3 GLY X  62     154.986 106.008 204.597  1.00  0.00           H
ATOM    976  C   GLY X  62     155.874 107.614 205.714  1.00  0.00           C
ATOM    977  O   GLY X  62     156.347 108.699 205.378  1.00  0.00           O
ATOM    978  N   PRO X  63     156.379 106.936 206.792  1.00  0.00           N
ATOM    979  CD  PRO X  63     155.926 105.694 207.409  1.00  0.00           C
ATOM    980  HD2 PRO X  63     156.540 104.873 207.040  1.00  0.00           H
ATOM    981  HD3 PRO X  63     154.961 105.387 207.006  1.00  0.00           H
ATOM    982  CG  PRO X  63     156.003 105.907 208.860  1.00  0.00           C
ATOM    983  HG2 PRO X  63     155.891 104.934 209.337  1.00  0.00           H
ATOM    984  HG3 PRO X  63     155.099 106.478 209.072  1.00  0.00           H
ATOM    985  CB  PRO X  63     157.374 106.635 208.944  1.00  0.00           C
ATOM    986  HB2 PRO X  63     158.223 105.968 208.794  1.00  0.00           H
ATOM    987  HB3 PRO X  63     157.506 107.029 209.952  1.00  0.00           H
ATOM    988  CA  PRO X  63     157.230 107.655 207.792  1.00  0.00           C
ATOM    989  HA  PRO X  63     156.671 108.471 208.249  1.00  0.00           H
ATOM    990  C   PRO X  63     158.599 108.126 207.252  1.00  0.00           C
ATOM    991  O   PRO X  63     159.302 108.871 207.924  1.00  0.00           O
ATOM    992  N   VAL X  64     158.994 107.639 206.068  1.00  0.00           N
ATOM    993  H   VAL X  64     158.404 106.995 205.562  1.00  0.00           H
ATOM    994  CA  VAL X  64     160.285 107.844 205.505  1.00  0.00           C
ATOM    995  HA  VAL X  64     160.689 108.790 205.866  1.00  0.00           H
ATOM    996  CB  VAL X  64     161.284 106.741 205.993  1.00  0.00           C
ATOM    997  HB  VAL X  64     160.937 105.736 205.753  1.00  0.00           H
ATOM    998  CG1 VAL X  64     162.600 107.118 205.371  1.00  0.00           C
ATOM    999 HG11 VAL X  64     162.792 108.188 205.455  1.00  0.00           H
ATOM   1000 HG12 VAL X  64     163.379 106.478 205.785  1.00  0.00           H
ATOM   1001 HG13 VAL X  64     162.569 106.826 204.321  1.00  0.00           H
ATOM   1002  CG2 VAL X  64     161.347 106.589 207.516  1.00  0.00           C
ATOM   1003 HG21 VAL X  64     162.057 105.802 207.770  1.00  0.00           H
ATOM   1004 HG22 VAL X  64     160.350 106.297 207.847  1.00  0.00           H
ATOM   1005 HG23 VAL X  64     161.691 107.539 207.924  1.00  0.00           H
ATOM   1006  C   VAL X  64     160.240 107.932 204.022  1.00  0.00           C
ATOM   1007  O   VAL X  64     159.910 107.009 203.252  1.00  0.00           O
ATOM   1008  N   PHE X  65     160.608 109.089 203.477  1.00  0.00           N
ATOM   1009  H   PHE X  65     161.105 109.700 204.109  1.00  0.00           H
ATOM   1010  CA  PHE X  65     160.405 109.461 202.093  1.00  0.00           C
ATOM   1011  HA  PHE X  65     160.526 108.491 201.612  1.00  0.00           H
ATOM   1012  CB  PHE X  65     158.920 110.038 201.908  1.00  0.00           C
ATOM   1013  HB2 PHE X  65     158.652 110.276 200.879  1.00  0.00           H
ATOM   1014  HB3 PHE X  65     158.141 109.311 202.138  1.00  0.00           H
ATOM   1015  CG  PHE X  65     158.682 111.307 202.745  1.00  0.00           C
ATOM   1016  CD1 PHE X  65     158.102 111.193 204.000  1.00  0.00           C
ATOM   1017  HD1 PHE X  65     157.905 110.203 204.382  1.00  0.00           H
ATOM   1018  CE1 PHE X  65     157.888 112.326 204.815  1.00  0.00           C
ATOM   1019  HE1 PHE X  65     157.494 112.280 205.819  1.00  0.00           H
ATOM   1020  CZ  PHE X  65     158.272 113.608 204.387  1.00  0.00           C
ATOM   1021  HZ  PHE X  65     158.271 114.437 205.079  1.00  0.00           H
ATOM   1022  CE2 PHE X  65     158.699 113.727 203.024  1.00  0.00           C
ATOM   1023  HE2 PHE X  65     159.004 114.713 202.707  1.00  0.00           H
ATOM   1024  CD2 PHE X  65     158.849 112.603 202.211  1.00  0.00           C
ATOM   1025  HD2 PHE X  65     159.156 112.718 201.182  1.00  0.00           H
ATOM   1026  C   PHE X  65     161.466 110.384 201.575  1.00  0.00           C
ATOM   1027  O   PHE X  65     162.315 110.962 202.280  1.00  0.00           O
ATOM   1028  N   THR X  66     161.376 110.733 200.249  1.00  0.00           N
ATOM   1029  H   THR X  66     160.734 110.257 199.632  1.00  0.00           H
ATOM   1030  CA  THR X  66     162.476 111.472 199.543  1.00  0.00           C
ATOM   1031  HA  THR X  66     163.289 111.670 200.241  1.00  0.00           H
ATOM   1032  CB  THR X  66     163.088 110.611 198.436  1.00  0.00           C
ATOM   1033  HB  THR X  66     163.866 111.120 197.867  1.00  0.00           H
ATOM   1034  CG2 THR X  66     163.752 109.282 198.971  1.00  0.00           C
ATOM   1035 HG21 THR X  66     162.950 108.789 199.521  1.00  0.00           H
ATOM   1036 HG22 THR X  66     164.543 109.425 199.706  1.00  0.00           H
ATOM   1037 HG23 THR X  66     164.006 108.701 198.085  1.00  0.00           H
ATOM   1038  OG1 THR X  66     162.136 110.106 197.604  1.00  0.00           O
ATOM   1039  HG1 THR X  66     161.451 109.614 198.063  1.00  0.00           H
ATOM   1040  C   THR X  66     162.012 112.876 198.986  1.00  0.00           C
ATOM   1041  O   THR X  66     160.842 113.109 198.733  1.00  0.00           O
ATOM   1042  N   LEU X  67     162.916 113.798 198.778  1.00  0.00           N
ATOM   1043  H   LEU X  67     163.853 113.559 199.070  1.00  0.00           H
ATOM   1044  CA  LEU X  67     162.824 114.975 197.914  1.00  0.00           C
ATOM   1045  HA  LEU X  67     161.943 114.859 197.283  1.00  0.00           H
ATOM   1046  CB  LEU X  67     162.854 116.285 198.781  1.00  0.00           C
ATOM   1047  HB2 LEU X  67     163.729 116.261 199.431  1.00  0.00           H
ATOM   1048  HB3 LEU X  67     163.070 117.114 198.108  1.00  0.00           H
ATOM   1049  CG  LEU X  67     161.510 116.715 199.449  1.00  0.00           C
ATOM   1050  HG  LEU X  67     161.553 117.793 199.606  1.00  0.00           H
ATOM   1051  CD1 LEU X  67     160.233 116.542 198.612  1.00  0.00           C
ATOM   1052 HD11 LEU X  67     160.157 117.256 197.792  1.00  0.00           H
ATOM   1053 HD12 LEU X  67     159.291 116.557 199.160  1.00  0.00           H
ATOM   1054 HD13 LEU X  67     160.223 115.517 198.241  1.00  0.00           H
ATOM   1055  CD2 LEU X  67     161.312 116.052 200.884  1.00  0.00           C
ATOM   1056 HD21 LEU X  67     161.260 114.971 200.754  1.00  0.00           H
ATOM   1057 HD22 LEU X  67     162.130 116.303 201.559  1.00  0.00           H
ATOM   1058 HD23 LEU X  67     160.331 116.434 201.166  1.00  0.00           H
ATOM   1059  C   LEU X  67     164.033 115.033 197.033  1.00  0.00           C
ATOM   1060  O   LEU X  67     165.028 114.417 197.392  1.00  0.00           O
ATOM   1061  N   TYR X  68     164.008 115.692 195.855  1.00  0.00           N
ATOM   1062  H   TYR X  68     163.097 115.990 195.537  1.00  0.00           H
ATOM   1063  CA  TYR X  68     165.090 115.982 194.945  1.00  0.00           C
ATOM   1064  HA  TYR X  68     166.043 115.931 195.473  1.00  0.00           H
ATOM   1065  CB  TYR X  68     165.057 115.045 193.743  1.00  0.00           C
ATOM   1066  HB2 TYR X  68     165.067 114.012 194.089  1.00  0.00           H
ATOM   1067  HB3 TYR X  68     164.077 115.154 193.279  1.00  0.00           H
ATOM   1068  CG  TYR X  68     166.191 115.254 192.783  1.00  0.00           C
ATOM   1069  CD1 TYR X  68     167.376 114.557 193.035  1.00  0.00           C
ATOM   1070  HD1 TYR X  68     167.339 113.799 193.803  1.00  0.00           H
ATOM   1071  CE1 TYR X  68     168.610 114.850 192.382  1.00  0.00           C
ATOM   1072  HE1 TYR X  68     169.489 114.245 192.545  1.00  0.00           H
ATOM   1073  CZ  TYR X  68     168.640 115.805 191.370  1.00  0.00           C
ATOM   1074  OH  TYR X  68     169.747 116.097 190.602  1.00  0.00           O
ATOM   1075  HH  TYR X  68     169.610 116.958 190.201  1.00  0.00           H
ATOM   1076  CE2 TYR X  68     167.415 116.482 191.092  1.00  0.00           C
ATOM   1077  HE2 TYR X  68     167.393 117.271 190.355  1.00  0.00           H
ATOM   1078  CD2 TYR X  68     166.227 116.269 191.814  1.00  0.00           C
ATOM   1079  HD2 TYR X  68     165.325 116.835 191.637  1.00  0.00           H
ATOM   1080  C   TYR X  68     165.046 117.449 194.488  1.00  0.00           C
ATOM   1081  O   TYR X  68     164.026 117.883 193.925  1.00  0.00           O
ATOM   1082  N   PHE X  69     166.011 118.209 194.869  1.00  0.00           N
ATOM   1083  H   PHE X  69     166.898 117.800 195.126  1.00  0.00           H
ATOM   1084  CA  PHE X  69     166.090 119.659 194.752  1.00  0.00           C
ATOM   1085  HA  PHE X  69     165.254 120.062 194.182  1.00  0.00           H
ATOM   1086  CB  PHE X  69     165.999 120.347 196.122  1.00  0.00           C
ATOM   1087  HB2 PHE X  69     166.645 119.901 196.879  1.00  0.00           H
ATOM   1088  HB3 PHE X  69     166.342 121.378 196.037  1.00  0.00           H
ATOM   1089  CG  PHE X  69     164.651 120.230 196.967  1.00  0.00           C
ATOM   1090  CD1 PHE X  69     164.754 120.248 198.384  1.00  0.00           C
ATOM   1091  HD1 PHE X  69     165.767 120.423 198.715  1.00  0.00           H
ATOM   1092  CE1 PHE X  69     163.561 120.287 199.151  1.00  0.00           C
ATOM   1093  HE1 PHE X  69     163.742 120.187 200.211  1.00  0.00           H
ATOM   1094  CZ  PHE X  69     162.268 120.294 198.555  1.00  0.00           C
ATOM   1095  HZ  PHE X  69     161.392 120.289 199.186  1.00  0.00           H
ATOM   1096  CE2 PHE X  69     162.197 120.271 197.151  1.00  0.00           C
ATOM   1097  HE2 PHE X  69     161.247 120.288 196.638  1.00  0.00           H
ATOM   1098  CD2 PHE X  69     163.387 120.216 196.400  1.00  0.00           C
ATOM   1099  HD2 PHE X  69     163.438 120.241 195.322  1.00  0.00           H
ATOM   1100  C   PHE X  69     167.368 120.113 194.047  1.00  0.00           C
ATOM   1101  O   PHE X  69     168.332 119.425 194.233  1.00  0.00           O
ATOM   1102  N   GLY X  70     167.377 121.175 193.274  1.00  0.00           N
ATOM   1103  H   GLY X  70     166.456 121.437 192.954  1.00  0.00           H
ATOM   1104  CA  GLY X  70     168.524 121.532 192.418  1.00  0.00           C
ATOM   1105  HA2 GLY X  70     168.105 121.848 191.463  1.00  0.00           H
ATOM   1106  HA3 GLY X  70     169.055 122.377 192.858  1.00  0.00           H
ATOM   1107  C   GLY X  70     169.492 120.394 191.921  1.00  0.00           C
ATOM   1108  O   GLY X  70     169.141 119.775 190.908  1.00  0.00           O
ATOM   1109  N   LEU X  71     170.593 120.116 192.612  1.00  0.00           N
ATOM   1110  H   LEU X  71     170.752 120.615 193.476  1.00  0.00           H
ATOM   1111  CA  LEU X  71     171.599 119.039 192.187  1.00  0.00           C
ATOM   1112  HA  LEU X  71     171.346 118.680 191.189  1.00  0.00           H
ATOM   1113  CB  LEU X  71     173.079 119.670 192.032  1.00  0.00           C
ATOM   1114  HB2 LEU X  71     173.468 119.913 193.021  1.00  0.00           H
ATOM   1115  HB3 LEU X  71     173.667 118.912 191.516  1.00  0.00           H
ATOM   1116  CG  LEU X  71     173.243 121.018 191.355  1.00  0.00           C
ATOM   1117  HG  LEU X  71     172.573 121.706 191.869  1.00  0.00           H
ATOM   1118  CD1 LEU X  71     174.699 121.457 191.554  1.00  0.00           C
ATOM   1119 HD11 LEU X  71     175.464 120.708 191.756  1.00  0.00           H
ATOM   1120 HD12 LEU X  71     174.766 122.012 192.490  1.00  0.00           H
ATOM   1121 HD13 LEU X  71     175.060 122.067 190.726  1.00  0.00           H
ATOM   1122  CD2 LEU X  71     172.876 120.959 189.893  1.00  0.00           C
ATOM   1123 HD21 LEU X  71     172.772 122.016 189.650  1.00  0.00           H
ATOM   1124 HD22 LEU X  71     173.616 120.399 189.321  1.00  0.00           H
ATOM   1125 HD23 LEU X  71     171.935 120.448 189.689  1.00  0.00           H
ATOM   1126  C   LEU X  71     171.612 117.839 193.049  1.00  0.00           C
ATOM   1127  O   LEU X  71     172.484 116.981 192.868  1.00  0.00           O
ATOM   1128  N   LYS X  72     170.638 117.734 193.998  1.00  0.00           N
ATOM   1129  H   LYS X  72     169.945 118.455 194.139  1.00  0.00           H
ATOM   1130  CA  LYS X  72     170.776 116.609 194.968  1.00  0.00           C
ATOM   1131  HA  LYS X  72     171.235 115.788 194.417  1.00  0.00           H
ATOM   1132  CB  LYS X  72     171.735 117.019 196.132  1.00  0.00           C
ATOM   1133  HB2 LYS X  72     171.902 116.070 196.641  1.00  0.00           H
ATOM   1134  HB3 LYS X  72     172.713 117.350 195.784  1.00  0.00           H
ATOM   1135  CG  LYS X  72     171.133 118.097 197.105  1.00  0.00           C
ATOM   1136  HG2 LYS X  72     170.691 118.868 196.473  1.00  0.00           H
ATOM   1137  HG3 LYS X  72     170.366 117.628 197.722  1.00  0.00           H
ATOM   1138  CD  LYS X  72     172.219 118.706 198.030  1.00  0.00           C
ATOM   1139  HD2 LYS X  72     172.897 117.889 198.274  1.00  0.00           H
ATOM   1140  HD3 LYS X  72     172.662 119.497 197.425  1.00  0.00           H
ATOM   1141  CE  LYS X  72     171.491 119.178 199.315  1.00  0.00           C
ATOM   1142  HE2 LYS X  72     170.652 119.835 199.083  1.00  0.00           H
ATOM   1143  HE3 LYS X  72     171.043 118.281 199.744  1.00  0.00           H
ATOM   1144  NZ  LYS X  72     172.261 120.000 200.331  1.00  0.00           N
ATOM   1145  HZ1 LYS X  72     173.025 119.400 200.608  1.00  0.00           H
ATOM   1146  HZ2 LYS X  72     171.776 120.270 201.175  1.00  0.00           H
ATOM   1147  HZ3 LYS X  72     172.632 120.805 199.847  1.00  0.00           H
ATOM   1148  C   LYS X  72     169.459 116.020 195.390  1.00  0.00           C
ATOM   1149  O   LYS X  72     168.447 116.653 195.576  1.00  0.00           O
ATOM   1150  N   PRO X  73     169.458 114.730 195.812  1.00  0.00           N
ATOM   1151  CD  PRO X  73     170.500 113.708 195.509  1.00  0.00           C
ATOM   1152  HD2 PRO X  73     171.452 113.854 196.019  1.00  0.00           H
ATOM   1153  HD3 PRO X  73     170.559 113.615 194.425  1.00  0.00           H
ATOM   1154  CG  PRO X  73     170.066 112.440 196.098  1.00  0.00           C
ATOM   1155  HG2 PRO X  73     170.513 112.223 197.068  1.00  0.00           H
ATOM   1156  HG3 PRO X  73     170.281 111.651 195.377  1.00  0.00           H
ATOM   1157  CB  PRO X  73     168.583 112.570 196.335  1.00  0.00           C
ATOM   1158  HB2 PRO X  73     168.304 111.999 197.221  1.00  0.00           H
ATOM   1159  HB3 PRO X  73     167.995 112.222 195.486  1.00  0.00           H
ATOM   1160  CA  PRO X  73     168.347 114.053 196.532  1.00  0.00           C
ATOM   1161  HA  PRO X  73     167.373 114.326 196.126  1.00  0.00           H
ATOM   1162  C   PRO X  73     168.526 114.354 198.038  1.00  0.00           C
ATOM   1163  O   PRO X  73     169.616 114.809 198.488  1.00  0.00           O
ATOM   1164  N   ILE X  74     167.413 114.225 198.810  1.00  0.00           N
ATOM   1165  H   ILE X  74     166.569 113.975 198.315  1.00  0.00           H
ATOM   1166  CA  ILE X  74     167.258 114.410 200.235  1.00  0.00           C
ATOM   1167  HA  ILE X  74     168.109 114.394 200.916  1.00  0.00           H
ATOM   1168  CB  ILE X  74     166.608 115.816 200.556  1.00  0.00           C
ATOM   1169  HB  ILE X  74     165.644 115.847 200.049  1.00  0.00           H
ATOM   1170  CG2 ILE X  74     166.099 115.948 201.976  1.00  0.00           C
ATOM   1171 HG21 ILE X  74     165.252 115.291 202.177  1.00  0.00           H
ATOM   1172 HG22 ILE X  74     165.875 116.991 202.196  1.00  0.00           H
ATOM   1173 HG23 ILE X  74     166.923 115.746 202.661  1.00  0.00           H
ATOM   1174  CG1 ILE X  74     167.581 116.979 200.124  1.00  0.00           C
ATOM   1175 HG12 ILE X  74     167.431 117.731 200.899  1.00  0.00           H
ATOM   1176 HG13 ILE X  74     168.652 116.804 200.229  1.00  0.00           H
ATOM   1177  CD1 ILE X  74     167.325 117.708 198.886  1.00  0.00           C
ATOM   1178 HD11 ILE X  74     166.324 118.132 198.963  1.00  0.00           H
ATOM   1179 HD12 ILE X  74     167.239 116.999 198.063  1.00  0.00           H
ATOM   1180 HD13 ILE X  74     168.038 118.526 198.783  1.00  0.00           H
ATOM   1181  C   ILE X  74     166.273 113.267 200.678  1.00  0.00           C
ATOM   1182  O   ILE X  74     165.264 113.018 200.033  1.00  0.00           O
ATOM   1183  N   VAL X  75     166.632 112.469 201.741  1.00  0.00           N
ATOM   1184  H   VAL X  75     167.462 112.654 202.286  1.00  0.00           H
ATOM   1185  CA  VAL X  75     165.641 111.597 202.433  1.00  0.00           C
ATOM   1186  HA  VAL X  75     164.758 111.502 201.801  1.00  0.00           H
ATOM   1187  CB  VAL X  75     166.192 110.157 202.657  1.00  0.00           C
ATOM   1188  HB  VAL X  75     166.868 109.928 201.833  1.00  0.00           H
ATOM   1189  CG1 VAL X  75     167.140 110.001 203.915  1.00  0.00           C
ATOM   1190 HG11 VAL X  75     168.046 110.599 203.816  1.00  0.00           H
ATOM   1191 HG12 VAL X  75     166.541 110.326 204.766  1.00  0.00           H
ATOM   1192 HG13 VAL X  75     167.380 108.940 203.982  1.00  0.00           H
ATOM   1193  CG2 VAL X  75     164.985 109.171 202.796  1.00  0.00           C
ATOM   1194 HG21 VAL X  75     164.381 109.330 203.689  1.00  0.00           H
ATOM   1195 HG22 VAL X  75     165.268 108.130 202.956  1.00  0.00           H
ATOM   1196 HG23 VAL X  75     164.353 109.230 201.910  1.00  0.00           H
ATOM   1197  C   VAL X  75     165.095 112.295 203.735  1.00  0.00           C
ATOM   1198  O   VAL X  75     165.672 113.319 204.210  1.00  0.00           O
ATOM   1199  N   VAL X  76     163.963 111.893 204.324  1.00  0.00           N
ATOM   1200  H   VAL X  76     163.444 111.345 203.653  1.00  0.00           H
ATOM   1201  CA  VAL X  76     163.173 112.647 205.364  1.00  0.00           C
ATOM   1202  HA  VAL X  76     163.821 113.323 205.922  1.00  0.00           H
ATOM   1203  CB  VAL X  76     161.961 113.336 204.757  1.00  0.00           C
ATOM   1204  HB  VAL X  76     161.436 112.478 204.337  1.00  0.00           H
ATOM   1205  CG1 VAL X  76     161.193 113.981 205.887  1.00  0.00           C
ATOM   1206 HG11 VAL X  76     160.724 113.203 206.490  1.00  0.00           H
ATOM   1207 HG12 VAL X  76     161.821 114.674 206.448  1.00  0.00           H
ATOM   1208 HG13 VAL X  76     160.455 114.651 205.447  1.00  0.00           H
ATOM   1209  CG2 VAL X  76     162.470 114.295 203.650  1.00  0.00           C
ATOM   1210 HG21 VAL X  76     161.584 114.812 203.280  1.00  0.00           H
ATOM   1211 HG22 VAL X  76     162.855 113.695 202.826  1.00  0.00           H
ATOM   1212 HG23 VAL X  76     163.153 115.058 204.025  1.00  0.00           H
ATOM   1213  C   VAL X  76     162.631 111.603 206.420  1.00  0.00           C
ATOM   1214  O   VAL X  76     162.042 110.609 206.026  1.00  0.00           O
ATOM   1215  N   LEU X  77     162.773 111.942 207.705  1.00  0.00           N
ATOM   1216  H   LEU X  77     163.528 112.567 207.946  1.00  0.00           H
ATOM   1217  CA  LEU X  77     162.189 111.149 208.721  1.00  0.00           C
ATOM   1218  HA  LEU X  77     161.859 110.177 208.355  1.00  0.00           H
ATOM   1219  CB  LEU X  77     163.350 110.783 209.775  1.00  0.00           C
ATOM   1220  HB2 LEU X  77     163.588 111.645 210.399  1.00  0.00           H
ATOM   1221  HB3 LEU X  77     162.945 110.141 210.558  1.00  0.00           H
ATOM   1222  CG  LEU X  77     164.719 110.188 209.263  1.00  0.00           C
ATOM   1223  HG  LEU X  77     165.267 110.889 208.633  1.00  0.00           H
ATOM   1224  CD1 LEU X  77     165.626 109.943 210.583  1.00  0.00           C
ATOM   1225 HD11 LEU X  77     165.590 110.838 211.205  1.00  0.00           H
ATOM   1226 HD12 LEU X  77     166.658 109.733 210.304  1.00  0.00           H
ATOM   1227 HD13 LEU X  77     165.220 109.130 211.186  1.00  0.00           H
ATOM   1228  CD2 LEU X  77     164.468 108.844 208.584  1.00  0.00           C
ATOM   1229 HD21 LEU X  77     165.326 108.485 208.016  1.00  0.00           H
ATOM   1230 HD22 LEU X  77     164.173 108.117 209.341  1.00  0.00           H
ATOM   1231 HD23 LEU X  77     163.635 108.979 207.894  1.00  0.00           H
ATOM   1232  C   LEU X  77     160.901 111.796 209.378  1.00  0.00           C
ATOM   1233  O   LEU X  77     160.934 113.050 209.566  1.00  0.00           O
ATOM   1234  N   HID X  78     159.851 110.982 209.766  1.00  0.00           N
ATOM   1235  H   HID X  78     159.794 110.019 209.469  1.00  0.00           H
ATOM   1236  CA  HID X  78     158.621 111.578 210.412  1.00  0.00           C
ATOM   1237  HA  HID X  78     158.940 112.436 211.005  1.00  0.00           H
ATOM   1238  CB  HID X  78     157.645 111.966 209.311  1.00  0.00           C
ATOM   1239  HB2 HID X  78     158.031 112.765 208.678  1.00  0.00           H
ATOM   1240  HB3 HID X  78     157.533 111.128 208.622  1.00  0.00           H
ATOM   1241  CG  HID X  78     156.225 112.374 209.685  1.00  0.00           C
ATOM   1242  ND1 HID X  78     155.268 111.540 210.159  1.00  0.00           N
ATOM   1243  HD1 HID X  78     155.370 110.536 210.215  1.00  0.00           H
ATOM   1244  CE1 HID X  78     154.182 112.257 210.537  1.00  0.00           C
ATOM   1245  HE1 HID X  78     153.287 111.972 211.069  1.00  0.00           H
ATOM   1246  NE2 HID X  78     154.499 113.542 210.391  1.00  0.00           N
ATOM   1247  CD2 HID X  78     155.858 113.641 210.005  1.00  0.00           C
ATOM   1248  HD2 HID X  78     156.456 114.520 209.818  1.00  0.00           H
ATOM   1249  C   HID X  78     158.067 110.541 211.402  1.00  0.00           C
ATOM   1250  O   HID X  78     157.975 109.406 211.014  1.00  0.00           O
ATOM   1251  N   GLY X  79     157.616 110.984 212.583  1.00  0.00           N
ATOM   1252  H   GLY X  79     157.768 111.946 212.847  1.00  0.00           H
ATOM   1253  CA  GLY X  79     157.016 110.041 213.483  1.00  0.00           C
ATOM   1254  HA2 GLY X  79     156.187 110.484 214.035  1.00  0.00           H
ATOM   1255  HA3 GLY X  79     156.591 109.230 212.893  1.00  0.00           H
ATOM   1256  C   GLY X  79     158.056 109.391 214.438  1.00  0.00           C
ATOM   1257  O   GLY X  79     159.287 109.529 214.345  1.00  0.00           O
ATOM   1258  N   TYR X  80     157.546 108.616 215.398  1.00  0.00           N
ATOM   1259  H   TYR X  80     156.547 108.574 215.540  1.00  0.00           H
ATOM   1260  CA  TYR X  80     158.401 108.308 216.526  1.00  0.00           C
ATOM   1261  HA  TYR X  80     158.948 109.184 216.873  1.00  0.00           H
ATOM   1262  CB  TYR X  80     157.556 107.752 217.636  1.00  0.00           C
ATOM   1263  HB2 TYR X  80     156.815 108.528 217.827  1.00  0.00           H
ATOM   1264  HB3 TYR X  80     157.098 106.809 217.339  1.00  0.00           H
ATOM   1265  CG  TYR X  80     158.414 107.598 218.868  1.00  0.00           C
ATOM   1266  CD1 TYR X  80     158.800 108.740 219.676  1.00  0.00           C
ATOM   1267  HD1 TYR X  80     158.432 109.721 219.415  1.00  0.00           H
ATOM   1268  CE1 TYR X  80     159.504 108.610 220.858  1.00  0.00           C
ATOM   1269  HE1 TYR X  80     159.764 109.436 221.503  1.00  0.00           H
ATOM   1270  CZ  TYR X  80     159.685 107.339 221.426  1.00  0.00           C
ATOM   1271  OH  TYR X  80     160.236 107.245 222.682  1.00  0.00           O
ATOM   1272  HH  TYR X  80     160.527 108.072 223.074  1.00  0.00           H
ATOM   1273  CE2 TYR X  80     159.372 106.150 220.673  1.00  0.00           C
ATOM   1274  HE2 TYR X  80     159.537 105.215 221.187  1.00  0.00           H
ATOM   1275  CD2 TYR X  80     158.781 106.319 219.407  1.00  0.00           C
ATOM   1276  HD2 TYR X  80     158.416 105.474 218.842  1.00  0.00           H
ATOM   1277  C   TYR X  80     159.488 107.295 216.082  1.00  0.00           C
ATOM   1278  O   TYR X  80     160.730 107.514 216.203  1.00  0.00           O
ATOM   1279  N   GLU X  81     159.029 106.178 215.499  1.00  0.00           N
ATOM   1280  H   GLU X  81     158.058 106.004 215.716  1.00  0.00           H
ATOM   1281  CA  GLU X  81     159.882 105.073 215.115  1.00  0.00           C
ATOM   1282  HA  GLU X  81     160.440 104.725 215.984  1.00  0.00           H
ATOM   1283  CB  GLU X  81     158.934 103.943 214.745  1.00  0.00           C
ATOM   1284  HB2 GLU X  81     158.221 103.801 215.556  1.00  0.00           H
ATOM   1285  HB3 GLU X  81     158.256 104.273 213.957  1.00  0.00           H
ATOM   1286  CG  GLU X  81     159.472 102.603 214.463  1.00  0.00           C
ATOM   1287  HG2 GLU X  81     160.213 102.622 213.663  1.00  0.00           H
ATOM   1288  HG3 GLU X  81     159.943 102.275 215.389  1.00  0.00           H
ATOM   1289  CD  GLU X  81     158.215 101.795 213.997  1.00  0.00           C
ATOM   1290  OE1 GLU X  81     157.691 100.983 214.753  1.00  0.00           O
ATOM   1291  OE2 GLU X  81     157.726 102.057 212.859  1.00  0.00           O
ATOM   1292  C   GLU X  81     160.988 105.478 214.142  1.00  0.00           C
ATOM   1293  O   GLU X  81     161.990 104.810 214.075  1.00  0.00           O
ATOM   1294  N   ALA X  82     160.864 106.553 213.426  1.00  0.00           N
ATOM   1295  H   ALA X  82     159.938 106.953 213.478  1.00  0.00           H
ATOM   1296  CA  ALA X  82     161.771 107.105 212.410  1.00  0.00           C
ATOM   1297  HA  ALA X  82     162.263 106.336 211.815  1.00  0.00           H
ATOM   1298  CB  ALA X  82     160.898 107.775 211.279  1.00  0.00           C
ATOM   1299  HB1 ALA X  82     160.091 107.108 210.975  1.00  0.00           H
ATOM   1300  HB2 ALA X  82     161.546 108.035 210.442  1.00  0.00           H
ATOM   1301  HB3 ALA X  82     160.444 108.713 211.600  1.00  0.00           H
ATOM   1302  C   ALA X  82     162.776 108.116 213.056  1.00  0.00           C
ATOM   1303  O   ALA X  82     163.995 108.108 212.887  1.00  0.00           O
ATOM   1304  N   VAL X  83     162.236 109.096 213.727  1.00  0.00           N
ATOM   1305  H   VAL X  83     161.236 109.084 213.864  1.00  0.00           H
ATOM   1306  CA  VAL X  83     162.823 110.270 214.420  1.00  0.00           C
ATOM   1307  HA  VAL X  83     163.645 110.590 213.779  1.00  0.00           H
ATOM   1308  CB  VAL X  83     161.734 111.468 214.558  1.00  0.00           C
ATOM   1309  HB  VAL X  83     160.926 111.196 215.237  1.00  0.00           H
ATOM   1310  CG1 VAL X  83     162.295 112.777 215.240  1.00  0.00           C
ATOM   1311 HG11 VAL X  83     163.271 113.040 214.831  1.00  0.00           H
ATOM   1312 HG12 VAL X  83     161.585 113.602 215.187  1.00  0.00           H
ATOM   1313 HG13 VAL X  83     162.382 112.578 216.308  1.00  0.00           H
ATOM   1314  CG2 VAL X  83     161.326 111.859 213.092  1.00  0.00           C
ATOM   1315 HG21 VAL X  83     160.756 112.773 213.263  1.00  0.00           H
ATOM   1316 HG22 VAL X  83     160.846 111.140 212.428  1.00  0.00           H
ATOM   1317 HG23 VAL X  83     162.229 112.144 212.552  1.00  0.00           H
ATOM   1318  C   VAL X  83     163.544 109.933 215.741  1.00  0.00           C
ATOM   1319  O   VAL X  83     164.342 110.722 216.217  1.00  0.00           O
ATOM   1320  N   LYS X  84     163.150 108.837 216.366  1.00  0.00           N
ATOM   1321  H   LYS X  84     162.322 108.409 215.977  1.00  0.00           H
ATOM   1322  CA  LYS X  84     163.723 108.280 217.617  1.00  0.00           C
ATOM   1323  HA  LYS X  84     164.565 108.873 217.974  1.00  0.00           H
ATOM   1324  CB  LYS X  84     162.722 108.372 218.801  1.00  0.00           C
ATOM   1325  HB2 LYS X  84     162.251 109.350 218.709  1.00  0.00           H
ATOM   1326  HB3 LYS X  84     161.870 107.701 218.697  1.00  0.00           H
ATOM   1327  CG  LYS X  84     163.348 108.172 220.160  1.00  0.00           C
ATOM   1328  HG2 LYS X  84     164.344 108.599 220.279  1.00  0.00           H
ATOM   1329  HG3 LYS X  84     162.733 108.596 220.954  1.00  0.00           H
ATOM   1330  CD  LYS X  84     163.566 106.689 220.497  1.00  0.00           C
ATOM   1331  HD2 LYS X  84     162.665 106.189 220.140  1.00  0.00           H
ATOM   1332  HD3 LYS X  84     164.418 106.324 219.924  1.00  0.00           H
ATOM   1333  CE  LYS X  84     163.669 106.344 221.987  1.00  0.00           C
ATOM   1334  HE2 LYS X  84     164.352 107.000 222.525  1.00  0.00           H
ATOM   1335  HE3 LYS X  84     162.709 106.529 222.469  1.00  0.00           H
ATOM   1336  NZ  LYS X  84     164.085 104.901 222.128  1.00  0.00           N
ATOM   1337  HZ1 LYS X  84     163.336 104.369 221.708  1.00  0.00           H
ATOM   1338  HZ2 LYS X  84     164.193 104.660 223.102  1.00  0.00           H
ATOM   1339  HZ3 LYS X  84     164.930 104.669 221.626  1.00  0.00           H
ATOM   1340  C   LYS X  84     164.418 106.907 217.516  1.00  0.00           C
ATOM   1341  O   LYS X  84     165.616 106.803 217.652  1.00  0.00           O
ATOM   1342  N   GLU X  85     163.643 105.833 217.170  1.00  0.00           N
ATOM   1343  H   GLU X  85     162.678 106.021 216.938  1.00  0.00           H
ATOM   1344  CA  GLU X  85     164.063 104.497 217.099  1.00  0.00           C
ATOM   1345  HA  GLU X  85     164.611 104.235 218.005  1.00  0.00           H
ATOM   1346  CB  GLU X  85     162.764 103.547 217.104  1.00  0.00           C
ATOM   1347  HB2 GLU X  85     162.155 103.631 216.204  1.00  0.00           H
ATOM   1348  HB3 GLU X  85     163.094 102.509 217.090  1.00  0.00           H
ATOM   1349  CG  GLU X  85     161.876 103.772 218.329  1.00  0.00           C
ATOM   1350  HG2 GLU X  85     161.551 104.808 218.423  1.00  0.00           H
ATOM   1351  HG3 GLU X  85     160.964 103.212 218.122  1.00  0.00           H
ATOM   1352  CD  GLU X  85     162.531 103.376 219.654  1.00  0.00           C
ATOM   1353  OE1 GLU X  85     162.045 103.872 220.688  1.00  0.00           O
ATOM   1354  OE2 GLU X  85     163.612 102.669 219.745  1.00  0.00           O
ATOM   1355  C   GLU X  85     165.069 104.109 215.985  1.00  0.00           C
ATOM   1356  O   GLU X  85     166.039 103.372 216.191  1.00  0.00           O
ATOM   1357  N   ALA X  86     164.887 104.645 214.767  1.00  0.00           N
ATOM   1358  H   ALA X  86     164.024 105.134 214.577  1.00  0.00           H
ATOM   1359  CA  ALA X  86     165.914 104.487 213.659  1.00  0.00           C
ATOM   1360  HA  ALA X  86     166.337 103.488 213.759  1.00  0.00           H
ATOM   1361  CB  ALA X  86     165.101 104.723 212.383  1.00  0.00           C
ATOM   1362  HB1 ALA X  86     165.520 104.123 211.575  1.00  0.00           H
ATOM   1363  HB2 ALA X  86     165.070 105.798 212.206  1.00  0.00           H
ATOM   1364  HB3 ALA X  86     164.103 104.284 212.404  1.00  0.00           H
ATOM   1365  C   ALA X  86     167.015 105.639 213.833  1.00  0.00           C
ATOM   1366  O   ALA X  86     168.132 105.354 213.587  1.00  0.00           O
ATOM   1367  N   LEU X  87     166.688 106.890 214.282  1.00  0.00           N
ATOM   1368  H   LEU X  87     165.756 107.133 214.586  1.00  0.00           H
ATOM   1369  CA  LEU X  87     167.611 107.866 214.683  1.00  0.00           C
ATOM   1370  HA  LEU X  87     168.247 108.037 213.814  1.00  0.00           H
ATOM   1371  CB  LEU X  87     166.846 109.145 215.106  1.00  0.00           C
ATOM   1372  HB2 LEU X  87     165.996 109.310 214.443  1.00  0.00           H
ATOM   1373  HB3 LEU X  87     166.480 109.094 216.131  1.00  0.00           H
ATOM   1374  CG  LEU X  87     167.910 110.236 215.027  1.00  0.00           C
ATOM   1375  HG  LEU X  87     168.683 110.147 215.790  1.00  0.00           H
ATOM   1376  CD1 LEU X  87     168.546 110.636 213.694  1.00  0.00           C
ATOM   1377 HD11 LEU X  87     169.243 109.820 213.500  1.00  0.00           H
ATOM   1378 HD12 LEU X  87     169.052 111.595 213.804  1.00  0.00           H
ATOM   1379 HD13 LEU X  87     167.907 110.729 212.816  1.00  0.00           H
ATOM   1380  CD2 LEU X  87     167.181 111.550 215.393  1.00  0.00           C
ATOM   1381 HD21 LEU X  87     167.822 112.431 215.405  1.00  0.00           H
ATOM   1382 HD22 LEU X  87     166.212 111.671 214.909  1.00  0.00           H
ATOM   1383 HD23 LEU X  87     166.862 111.350 216.416  1.00  0.00           H
ATOM   1384  C   LEU X  87     168.642 107.429 215.682  1.00  0.00           C
ATOM   1385  O   LEU X  87     169.897 107.624 215.570  1.00  0.00           O
ATOM   1386  N   ILE X  88     168.335 106.612 216.768  1.00  0.00           N
ATOM   1387  H   ILE X  88     167.363 106.387 216.927  1.00  0.00           H
ATOM   1388  CA  ILE X  88     169.290 105.814 217.673  1.00  0.00           C
ATOM   1389  HA  ILE X  88     170.044 106.495 218.068  1.00  0.00           H
ATOM   1390  CB  ILE X  88     168.605 105.210 218.903  1.00  0.00           C
ATOM   1391  HB  ILE X  88     167.787 104.708 218.386  1.00  0.00           H
ATOM   1392  CG2 ILE X  88     169.593 104.269 219.640  1.00  0.00           C
ATOM   1393 HG21 ILE X  88     169.206 104.133 220.649  1.00  0.00           H
ATOM   1394 HG22 ILE X  88     170.553 104.755 219.814  1.00  0.00           H
ATOM   1395 HG23 ILE X  88     169.747 103.325 219.117  1.00  0.00           H
ATOM   1396  CG1 ILE X  88     168.099 106.471 219.788  1.00  0.00           C
ATOM   1397 HG12 ILE X  88     169.004 106.933 220.185  1.00  0.00           H
ATOM   1398 HG13 ILE X  88     167.589 107.150 219.105  1.00  0.00           H
ATOM   1399  CD1 ILE X  88     167.200 105.987 220.861  1.00  0.00           C
ATOM   1400 HD11 ILE X  88     167.721 105.646 221.756  1.00  0.00           H
ATOM   1401 HD12 ILE X  88     166.563 105.181 220.497  1.00  0.00           H
ATOM   1402 HD13 ILE X  88     166.587 106.810 221.229  1.00  0.00           H
ATOM   1403  C   ILE X  88     170.116 104.725 216.984  1.00  0.00           C
ATOM   1404  O   ILE X  88     171.342 104.756 217.121  1.00  0.00           O
ATOM   1405  N   ASP X  89     169.511 103.789 216.263  1.00  0.00           N
ATOM   1406  H   ASP X  89     168.507 103.849 216.357  1.00  0.00           H
ATOM   1407  CA  ASP X  89     170.112 102.745 215.454  1.00  0.00           C
ATOM   1408  HA  ASP X  89     170.749 102.169 216.126  1.00  0.00           H
ATOM   1409  CB  ASP X  89     168.947 101.932 214.915  1.00  0.00           C
ATOM   1410  HB2 ASP X  89     168.245 102.577 214.385  1.00  0.00           H
ATOM   1411  HB3 ASP X  89     169.385 101.198 214.239  1.00  0.00           H
ATOM   1412  CG  ASP X  89     168.264 101.051 216.017  1.00  0.00           C
ATOM   1413  OD1 ASP X  89     168.519 101.116 217.235  1.00  0.00           O
ATOM   1414  OD2 ASP X  89     167.269 100.314 215.705  1.00  0.00           O
ATOM   1415  C   ASP X  89     171.086 103.163 214.314  1.00  0.00           C
ATOM   1416  O   ASP X  89     172.132 102.541 214.093  1.00  0.00           O
ATOM   1417  N   LEU X  90     170.714 104.176 213.592  1.00  0.00           N
ATOM   1418  H   LEU X  90     169.848 104.647 213.813  1.00  0.00           H
ATOM   1419  CA  LEU X  90     171.543 104.834 212.541  1.00  0.00           C
ATOM   1420  HA  LEU X  90     172.326 104.170 212.174  1.00  0.00           H
ATOM   1421  CB  LEU X  90     170.607 105.159 211.365  1.00  0.00           C
ATOM   1422  HB2 LEU X  90     169.884 105.825 211.836  1.00  0.00           H
ATOM   1423  HB3 LEU X  90     171.033 105.746 210.551  1.00  0.00           H
ATOM   1424  CG  LEU X  90     169.878 103.961 210.717  1.00  0.00           C
ATOM   1425  HG  LEU X  90     169.297 103.486 211.508  1.00  0.00           H
ATOM   1426  CD1 LEU X  90     168.926 104.262 209.620  1.00  0.00           C
ATOM   1427 HD11 LEU X  90     169.509 104.536 208.741  1.00  0.00           H
ATOM   1428 HD12 LEU X  90     168.358 105.157 209.871  1.00  0.00           H
ATOM   1429 HD13 LEU X  90     168.140 103.552 209.365  1.00  0.00           H
ATOM   1430  CD2 LEU X  90     170.878 102.888 210.107  1.00  0.00           C
ATOM   1431 HD21 LEU X  90     171.706 103.436 209.656  1.00  0.00           H
ATOM   1432 HD22 LEU X  90     171.376 102.406 210.948  1.00  0.00           H
ATOM   1433 HD23 LEU X  90     170.360 102.109 209.548  1.00  0.00           H
ATOM   1434  C   LEU X  90     172.413 106.003 213.051  1.00  0.00           C
ATOM   1435  O   LEU X  90     172.787 106.991 212.391  1.00  0.00           O
ATOM   1436  N   GLY X  91     172.629 105.965 214.376  1.00  0.00           N
ATOM   1437  H   GLY X  91     172.021 105.354 214.902  1.00  0.00           H
ATOM   1438  CA  GLY X  91     173.353 106.985 215.165  1.00  0.00           C
ATOM   1439  HA2 GLY X  91     172.953 107.975 214.945  1.00  0.00           H
ATOM   1440  HA3 GLY X  91     173.218 106.834 216.236  1.00  0.00           H
ATOM   1441  C   GLY X  91     174.814 107.241 214.781  1.00  0.00           C
ATOM   1442  O   GLY X  91     175.382 108.246 215.235  1.00  0.00           O
ATOM   1443  N   GLU X  92     175.451 106.355 214.018  1.00  0.00           N
ATOM   1444  H   GLU X  92     174.938 105.492 213.906  1.00  0.00           H
ATOM   1445  CA  GLU X  92     176.791 106.625 213.332  1.00  0.00           C
ATOM   1446  HA  GLU X  92     177.245 107.453 213.876  1.00  0.00           H
ATOM   1447  CB  GLU X  92     177.707 105.447 213.437  1.00  0.00           C
ATOM   1448  HB2 GLU X  92     177.736 105.172 214.492  1.00  0.00           H
ATOM   1449  HB3 GLU X  92     177.307 104.613 212.861  1.00  0.00           H
ATOM   1450  CG  GLU X  92     179.140 105.610 213.075  1.00  0.00           C
ATOM   1451  HG2 GLU X  92     179.644 104.705 213.412  1.00  0.00           H
ATOM   1452  HG3 GLU X  92     179.320 105.753 212.009  1.00  0.00           H
ATOM   1453  CD  GLU X  92     179.935 106.839 213.625  1.00  0.00           C
ATOM   1454  OE1 GLU X  92     180.805 107.423 212.909  1.00  0.00           O
ATOM   1455  OE2 GLU X  92     179.571 107.133 214.810  1.00  0.00           O
ATOM   1456  C   GLU X  92     176.560 107.010 211.834  1.00  0.00           C
ATOM   1457  O   GLU X  92     177.192 107.914 211.307  1.00  0.00           O
ATOM   1458  N   GLU X  93     175.608 106.322 211.187  1.00  0.00           N
ATOM   1459  H   GLU X  93     175.079 105.659 211.736  1.00  0.00           H
ATOM   1460  CA  GLU X  93     175.333 106.308 209.735  1.00  0.00           C
ATOM   1461  HA  GLU X  93     176.345 106.358 209.334  1.00  0.00           H
ATOM   1462  CB  GLU X  93     174.842 104.967 209.264  1.00  0.00           C
ATOM   1463  HB2 GLU X  93     173.839 104.784 209.651  1.00  0.00           H
ATOM   1464  HB3 GLU X  93     174.823 105.075 208.180  1.00  0.00           H
ATOM   1465  CG  GLU X  93     175.836 103.798 209.408  1.00  0.00           C
ATOM   1466  HG2 GLU X  93     175.419 102.948 208.868  1.00  0.00           H
ATOM   1467  HG3 GLU X  93     176.842 104.087 209.105  1.00  0.00           H
ATOM   1468  CD  GLU X  93     175.797 103.187 210.809  1.00  0.00           C
ATOM   1469  OE1 GLU X  93     174.928 103.539 211.677  1.00  0.00           O
ATOM   1470  OE2 GLU X  93     176.599 102.258 210.958  1.00  0.00           O
ATOM   1471  C   GLU X  93     174.662 107.552 209.173  1.00  0.00           C
ATOM   1472  O   GLU X  93     175.061 108.007 208.129  1.00  0.00           O
ATOM   1473  N   PHE X  94     173.894 108.214 210.124  1.00  0.00           N
ATOM   1474  H   PHE X  94     173.744 107.749 211.008  1.00  0.00           H
ATOM   1475  CA  PHE X  94     173.282 109.530 209.966  1.00  0.00           C
ATOM   1476  HA  PHE X  94     173.393 109.804 208.917  1.00  0.00           H
ATOM   1477  CB  PHE X  94     171.838 109.523 210.383  1.00  0.00           C
ATOM   1478  HB2 PHE X  94     171.783 109.187 211.418  1.00  0.00           H
ATOM   1479  HB3 PHE X  94     171.454 110.543 210.350  1.00  0.00           H
ATOM   1480  CG  PHE X  94     170.790 108.717 209.609  1.00  0.00           C
ATOM   1481  CD1 PHE X  94     171.161 108.080 208.385  1.00  0.00           C
ATOM   1482  HD1 PHE X  94     172.088 108.238 207.853  1.00  0.00           H
ATOM   1483  CE1 PHE X  94     170.210 107.280 207.776  1.00  0.00           C
ATOM   1484  HE1 PHE X  94     170.425 106.916 206.782  1.00  0.00           H
ATOM   1485  CZ  PHE X  94     168.906 107.088 208.323  1.00  0.00           C
ATOM   1486  HZ  PHE X  94     168.235 106.484 207.732  1.00  0.00           H
ATOM   1487  CE2 PHE X  94     168.622 107.688 209.539  1.00  0.00           C
ATOM   1488  HE2 PHE X  94     167.723 107.503 210.108  1.00  0.00           H
ATOM   1489  CD2 PHE X  94     169.510 108.488 210.168  1.00  0.00           C
ATOM   1490  HD2 PHE X  94     169.297 109.003 211.093  1.00  0.00           H
ATOM   1491  C   PHE X  94     173.998 110.622 210.713  1.00  0.00           C
ATOM   1492  O   PHE X  94     173.485 111.740 210.759  1.00  0.00           O
ATOM   1493  N   SER X  95     175.203 110.293 211.210  1.00  0.00           N
ATOM   1494  H   SER X  95     175.581 109.420 210.872  1.00  0.00           H
ATOM   1495  CA  SER X  95     175.969 111.303 211.959  1.00  0.00           C
ATOM   1496  HA  SER X  95     175.283 111.679 212.717  1.00  0.00           H
ATOM   1497  CB  SER X  95     177.186 110.691 212.709  1.00  0.00           C
ATOM   1498  HB2 SER X  95     177.570 111.458 213.382  1.00  0.00           H
ATOM   1499  HB3 SER X  95     176.951 109.845 213.355  1.00  0.00           H
ATOM   1500  OG  SER X  95     178.183 110.301 211.814  1.00  0.00           O
ATOM   1501  HG  SER X  95     177.757 109.588 211.333  1.00  0.00           H
ATOM   1502  C   SER X  95     176.398 112.583 211.227  1.00  0.00           C
ATOM   1503  O   SER X  95     177.029 113.469 211.857  1.00  0.00           O
ATOM   1504  N   GLY X  96     176.113 112.704 209.938  1.00  0.00           N
ATOM   1505  H   GLY X  96     175.565 111.960 209.532  1.00  0.00           H
ATOM   1506  CA  GLY X  96     176.281 113.950 209.246  1.00  0.00           C
ATOM   1507  HA2 GLY X  96     177.354 114.142 209.264  1.00  0.00           H
ATOM   1508  HA3 GLY X  96     175.942 113.838 208.217  1.00  0.00           H
ATOM   1509  C   GLY X  96     175.575 115.218 209.795  1.00  0.00           C
ATOM   1510  O   GLY X  96     174.501 115.173 210.304  1.00  0.00           O
ATOM   1511  N   ARG X  97     176.150 116.372 209.378  1.00  0.00           N
ATOM   1512  H   ARG X  97     177.093 116.257 209.034  1.00  0.00           H
ATOM   1513  CA  ARG X  97     175.507 117.767 209.360  1.00  0.00           C
ATOM   1514  HA  ARG X  97     174.435 117.683 209.537  1.00  0.00           H
ATOM   1515  CB  ARG X  97     176.079 118.560 210.505  1.00  0.00           C
ATOM   1516  HB2 ARG X  97     177.086 118.152 210.588  1.00  0.00           H
ATOM   1517  HB3 ARG X  97     176.087 119.635 210.326  1.00  0.00           H
ATOM   1518  CG  ARG X  97     175.485 118.308 211.906  1.00  0.00           C
ATOM   1519  HG2 ARG X  97     175.487 117.224 212.019  1.00  0.00           H
ATOM   1520  HG3 ARG X  97     176.141 118.714 212.676  1.00  0.00           H
ATOM   1521  CD  ARG X  97     174.038 118.827 211.995  1.00  0.00           C
ATOM   1522  HD2 ARG X  97     174.081 119.915 212.044  1.00  0.00           H
ATOM   1523  HD3 ARG X  97     173.514 118.392 211.143  1.00  0.00           H
ATOM   1524  NE  ARG X  97     173.411 118.329 213.180  1.00  0.00           N
ATOM   1525  HE  ARG X  97     172.610 117.721 213.089  1.00  0.00           H
ATOM   1526  CZ  ARG X  97     173.728 118.576 214.464  1.00  0.00           C
ATOM   1527  NH1 ARG X  97     174.662 119.461 214.636  1.00  0.00           N
ATOM   1528 HH11 ARG X  97     175.156 119.832 213.837  1.00  0.00           H
ATOM   1529 HH12 ARG X  97     175.036 119.497 215.574  1.00  0.00           H
ATOM   1530  NH2 ARG X  97     173.228 118.051 215.564  1.00  0.00           N
ATOM   1531 HH21 ARG X  97     172.430 117.439 215.469  1.00  0.00           H
ATOM   1532 HH22 ARG X  97     173.682 118.046 216.466  1.00  0.00           H
ATOM   1533  C   ARG X  97     175.777 118.477 208.079  1.00  0.00           C
ATOM   1534  O   ARG X  97     176.894 118.511 207.585  1.00  0.00           O
ATOM   1535  N   GLY X  98     174.715 119.140 207.540  1.00  0.00           N
ATOM   1536  H   GLY X  98     173.826 119.077 208.015  1.00  0.00           H
ATOM   1537  CA  GLY X  98     174.803 119.838 206.275  1.00  0.00           C
ATOM   1538  HA2 GLY X  98     175.213 119.152 205.534  1.00  0.00           H
ATOM   1539  HA3 GLY X  98     173.817 120.182 205.965  1.00  0.00           H
ATOM   1540  C   GLY X  98     175.816 120.985 206.411  1.00  0.00           C
ATOM   1541  O   GLY X  98     175.754 121.707 207.407  1.00  0.00           O
ATOM   1542  N   ILE X  99     176.834 121.107 205.534  1.00  0.00           N
ATOM   1543  H   ILE X  99     176.780 120.440 204.777  1.00  0.00           H
ATOM   1544  CA  ILE X  99     177.863 122.172 205.659  1.00  0.00           C
ATOM   1545  HA  ILE X  99     177.951 122.230 206.743  1.00  0.00           H
ATOM   1546  CB  ILE X  99     179.237 121.695 205.038  1.00  0.00           C
ATOM   1547  HB  ILE X  99     179.883 122.551 205.234  1.00  0.00           H
ATOM   1548  CG2 ILE X  99     179.778 120.550 205.885  1.00  0.00           C
ATOM   1549 HG21 ILE X  99     179.701 120.819 206.939  1.00  0.00           H
ATOM   1550 HG22 ILE X  99     180.823 120.415 205.607  1.00  0.00           H
ATOM   1551 HG23 ILE X  99     179.186 119.635 205.833  1.00  0.00           H
ATOM   1552  CG1 ILE X  99     179.088 121.399 203.559  1.00  0.00           C
ATOM   1553 HG12 ILE X  99     178.194 120.815 203.342  1.00  0.00           H
ATOM   1554 HG13 ILE X  99     179.095 122.328 202.989  1.00  0.00           H
ATOM   1555  CD1 ILE X  99     180.327 120.649 202.963  1.00  0.00           C
ATOM   1556 HD11 ILE X  99     180.333 119.641 203.379  1.00  0.00           H
ATOM   1557 HD12 ILE X  99     181.284 121.163 203.060  1.00  0.00           H
ATOM   1558 HD13 ILE X  99     180.215 120.684 201.880  1.00  0.00           H
ATOM   1559  C   ILE X  99     177.330 123.489 205.095  1.00  0.00           C
ATOM   1560  O   ILE X  99     177.924 124.485 205.383  1.00  0.00           O
ATOM   1561  N   PHE X 100     176.217 123.578 204.353  1.00  0.00           N
ATOM   1562  H   PHE X 100     175.838 122.647 204.256  1.00  0.00           H
ATOM   1563  CA  PHE X 100     175.712 124.794 203.671  1.00  0.00           C
ATOM   1564  HA  PHE X 100     174.735 124.511 203.278  1.00  0.00           H
ATOM   1565  CB  PHE X 100     175.332 125.853 204.695  1.00  0.00           C
ATOM   1566  HB2 PHE X 100     176.162 126.091 205.360  1.00  0.00           H
ATOM   1567  HB3 PHE X 100     175.226 126.837 204.237  1.00  0.00           H
ATOM   1568  CG  PHE X 100     174.139 125.481 205.514  1.00  0.00           C
ATOM   1569  CD1 PHE X 100     174.327 124.683 206.695  1.00  0.00           C
ATOM   1570  HD1 PHE X 100     175.331 124.417 206.991  1.00  0.00           H
ATOM   1571  CE1 PHE X 100     173.145 124.317 207.408  1.00  0.00           C
ATOM   1572  HE1 PHE X 100     173.240 123.662 208.262  1.00  0.00           H
ATOM   1573  CZ  PHE X 100     171.854 124.678 206.948  1.00  0.00           C
ATOM   1574  HZ  PHE X 100     170.975 124.311 207.457  1.00  0.00           H
ATOM   1575  CE2 PHE X 100     171.724 125.328 205.718  1.00  0.00           C
ATOM   1576  HE2 PHE X 100     170.775 125.571 205.263  1.00  0.00           H
ATOM   1577  CD2 PHE X 100     172.867 125.748 205.022  1.00  0.00           C
ATOM   1578  HD2 PHE X 100     172.707 126.240 204.074  1.00  0.00           H
ATOM   1579  C   PHE X 100     176.705 125.240 202.560  1.00  0.00           C
ATOM   1580  O   PHE X 100     177.803 124.817 202.572  1.00  0.00           O
ATOM   1581  N   PRO X 101     176.376 126.183 201.659  1.00  0.00           N
ATOM   1582  CD  PRO X 101     175.014 126.506 201.303  1.00  0.00           C
ATOM   1583  HD2 PRO X 101     174.703 127.431 201.790  1.00  0.00           H
ATOM   1584  HD3 PRO X 101     174.312 125.682 201.427  1.00  0.00           H
ATOM   1585  CG  PRO X 101     174.999 126.689 199.760  1.00  0.00           C
ATOM   1586  HG2 PRO X 101     174.307 127.516 199.596  1.00  0.00           H
ATOM   1587  HG3 PRO X 101     174.782 125.822 199.135  1.00  0.00           H
ATOM   1588  CB  PRO X 101     176.309 127.261 199.494  1.00  0.00           C
ATOM   1589  HB2 PRO X 101     176.194 128.313 199.756  1.00  0.00           H
ATOM   1590  HB3 PRO X 101     176.604 127.085 198.459  1.00  0.00           H
ATOM   1591  CA  PRO X 101     177.187 126.558 200.493  1.00  0.00           C
ATOM   1592  HA  PRO X 101     177.463 125.644 199.966  1.00  0.00           H
ATOM   1593  C   PRO X 101     178.448 127.292 200.816  1.00  0.00           C
ATOM   1594  O   PRO X 101     179.040 127.770 199.861  1.00  0.00           O
ATOM   1595  N   LEU X 102     178.942 127.396 202.050  1.00  0.00           N
ATOM   1596  H   LEU X 102     178.671 126.757 202.784  1.00  0.00           H
ATOM   1597  CA  LEU X 102     180.016 128.224 202.384  1.00  0.00           C
ATOM   1598  HA  LEU X 102     179.941 129.141 201.799  1.00  0.00           H
ATOM   1599  CB  LEU X 102     179.997 128.574 203.856  1.00  0.00           C
ATOM   1600  HB2 LEU X 102     179.965 127.640 204.417  1.00  0.00           H
ATOM   1601  HB3 LEU X 102     180.944 129.053 204.106  1.00  0.00           H
ATOM   1602  CG  LEU X 102     178.935 129.591 204.265  1.00  0.00           C
ATOM   1603  HG  LEU X 102     178.833 130.386 203.527  1.00  0.00           H
ATOM   1604  CD1 LEU X 102     177.650 128.909 204.715  1.00  0.00           C
ATOM   1605 HD11 LEU X 102     177.267 128.526 203.769  1.00  0.00           H
ATOM   1606 HD12 LEU X 102     176.891 129.627 205.026  1.00  0.00           H
ATOM   1607 HD13 LEU X 102     177.805 128.061 205.382  1.00  0.00           H
ATOM   1608  CD2 LEU X 102     179.448 130.255 205.580  1.00  0.00           C
ATOM   1609 HD21 LEU X 102     180.354 130.766 205.255  1.00  0.00           H
ATOM   1610 HD22 LEU X 102     178.664 130.898 205.979  1.00  0.00           H
ATOM   1611 HD23 LEU X 102     179.744 129.460 206.265  1.00  0.00           H
ATOM   1612  C   LEU X 102     181.396 127.491 202.067  1.00  0.00           C
ATOM   1613  O   LEU X 102     181.434 126.258 202.304  1.00  0.00           O
ATOM   1614  N   ALA X 103     182.439 128.205 201.690  1.00  0.00           N
ATOM   1615  H   ALA X 103     182.419 129.209 201.796  1.00  0.00           H
ATOM   1616  CA  ALA X 103     183.748 127.608 201.244  1.00  0.00           C
ATOM   1617  HA  ALA X 103     183.540 126.655 200.757  1.00  0.00           H
ATOM   1618  CB  ALA X 103     184.588 128.548 200.354  1.00  0.00           C
ATOM   1619  HB1 ALA X 103     184.966 129.366 200.967  1.00  0.00           H
ATOM   1620  HB2 ALA X 103     184.016 128.909 199.499  1.00  0.00           H
ATOM   1621  HB3 ALA X 103     185.492 128.097 199.945  1.00  0.00           H
ATOM   1622  C   ALA X 103     184.585 127.190 202.484  1.00  0.00           C
ATOM   1623  O   ALA X 103     184.373 127.600 203.645  1.00  0.00           O
ATOM   1624  N   GLU X 104     185.480 126.186 202.227  1.00  0.00           N
ATOM   1625  H   GLU X 104     185.598 125.889 201.268  1.00  0.00           H
ATOM   1626  CA  GLU X 104     186.330 125.535 203.261  1.00  0.00           C
ATOM   1627  HA  GLU X 104     185.649 125.063 203.970  1.00  0.00           H
ATOM   1628  CB  GLU X 104     187.127 124.412 202.623  1.00  0.00           C
ATOM   1629  HB2 GLU X 104     186.491 123.897 201.904  1.00  0.00           H
ATOM   1630  HB3 GLU X 104     187.896 124.913 202.035  1.00  0.00           H
ATOM   1631  CG  GLU X 104     187.870 123.372 203.563  1.00  0.00           C
ATOM   1632  HG2 GLU X 104     188.431 122.661 202.956  1.00  0.00           H
ATOM   1633  HG3 GLU X 104     188.667 124.002 203.959  1.00  0.00           H
ATOM   1634  CD  GLU X 104     187.031 122.703 204.684  1.00  0.00           C
ATOM   1635  OE1 GLU X 104     185.835 122.460 204.506  1.00  0.00           O
ATOM   1636  OE2 GLU X 104     187.610 122.552 205.811  1.00  0.00           O
ATOM   1637  C   GLU X 104     187.140 126.482 204.085  1.00  0.00           C
ATOM   1638  O   GLU X 104     187.313 126.315 205.298  1.00  0.00           O
ATOM   1639  N   ARG X 105     187.640 127.566 203.517  1.00  0.00           N
ATOM   1640  H   ARG X 105     187.617 127.563 202.507  1.00  0.00           H
ATOM   1641  CA  ARG X 105     188.376 128.734 204.165  1.00  0.00           C
ATOM   1642  HA  ARG X 105     189.198 128.284 204.721  1.00  0.00           H
ATOM   1643  CB  ARG X 105     188.953 129.763 203.075  1.00  0.00           C
ATOM   1644  HB2 ARG X 105     189.765 130.293 203.572  1.00  0.00           H
ATOM   1645  HB3 ARG X 105     189.353 129.220 202.219  1.00  0.00           H
ATOM   1646  CG  ARG X 105     187.830 130.780 202.653  1.00  0.00           C
ATOM   1647  HG2 ARG X 105     186.950 130.195 202.386  1.00  0.00           H
ATOM   1648  HG3 ARG X 105     187.622 131.428 203.504  1.00  0.00           H
ATOM   1649  CD  ARG X 105     188.337 131.485 201.370  1.00  0.00           C
ATOM   1650  HD2 ARG X 105     189.415 131.501 201.528  1.00  0.00           H
ATOM   1651  HD3 ARG X 105     188.017 130.923 200.493  1.00  0.00           H
ATOM   1652  NE  ARG X 105     187.853 132.854 201.100  1.00  0.00           N
ATOM   1653  HE  ARG X 105     187.563 133.512 201.810  1.00  0.00           H
ATOM   1654  CZ  ARG X 105     187.815 133.385 199.888  1.00  0.00           C
ATOM   1655  NH1 ARG X 105     187.970 132.743 198.816  1.00  0.00           N
ATOM   1656 HH11 ARG X 105     187.969 131.733 198.829  1.00  0.00           H
ATOM   1657 HH12 ARG X 105     188.109 133.202 197.927  1.00  0.00           H
ATOM   1658  NH2 ARG X 105     187.621 134.677 199.819  1.00  0.00           N
ATOM   1659 HH21 ARG X 105     187.437 135.220 200.651  1.00  0.00           H
ATOM   1660 HH22 ARG X 105     187.742 135.038 198.883  1.00  0.00           H
ATOM   1661  C   ARG X 105     187.533 129.461 205.307  1.00  0.00           C
ATOM   1662  O   ARG X 105     188.201 130.172 206.085  1.00  0.00           O
ATOM   1663  N   ALA X 106     186.217 129.235 205.468  1.00  0.00           N
ATOM   1664  H   ALA X 106     185.799 128.764 204.679  1.00  0.00           H
ATOM   1665  CA  ALA X 106     185.527 129.610 206.642  1.00  0.00           C
ATOM   1666  HA  ALA X 106     185.687 130.680 206.782  1.00  0.00           H
ATOM   1667  CB  ALA X 106     184.017 129.383 206.346  1.00  0.00           C
ATOM   1668  HB1 ALA X 106     183.445 129.855 207.145  1.00  0.00           H
ATOM   1669  HB2 ALA X 106     183.686 128.345 206.375  1.00  0.00           H
ATOM   1670  HB3 ALA X 106     183.663 129.847 205.426  1.00  0.00           H
ATOM   1671  C   ALA X 106     185.951 128.845 207.903  1.00  0.00           C
ATOM   1672  O   ALA X 106     185.711 129.364 208.973  1.00  0.00           O
ATOM   1673  N   ASN X 107     186.603 127.673 207.730  1.00  0.00           N
ATOM   1674  H   ASN X 107     186.756 127.394 206.772  1.00  0.00           H
ATOM   1675  CA  ASN X 107     187.075 126.912 208.829  1.00  0.00           C
ATOM   1676  HA  ASN X 107     187.437 125.970 208.416  1.00  0.00           H
ATOM   1677  CB  ASN X 107     188.391 127.551 209.456  1.00  0.00           C
ATOM   1678  HB2 ASN X 107     188.141 128.485 209.960  1.00  0.00           H
ATOM   1679  HB3 ASN X 107     188.676 126.794 210.186  1.00  0.00           H
ATOM   1680  CG  ASN X 107     189.588 127.739 208.491  1.00  0.00           C
ATOM   1681  OD1 ASN X 107     189.544 127.535 207.304  1.00  0.00           O
ATOM   1682  ND2 ASN X 107     190.693 128.010 209.053  1.00  0.00           N
ATOM   1683 HD21 ASN X 107     190.760 127.904 210.055  1.00  0.00           H
ATOM   1684 HD22 ASN X 107     191.527 128.253 208.538  1.00  0.00           H
ATOM   1685  C   ASN X 107     186.107 126.299 209.852  1.00  0.00           C
ATOM   1686  O   ASN X 107     186.386 125.896 210.936  1.00  0.00           O
ATOM   1687  N   ARG X 108     184.790 126.335 209.536  1.00  0.00           N
ATOM   1688  H   ARG X 108     184.653 126.722 208.613  1.00  0.00           H
ATOM   1689  CA  ARG X 108     183.570 125.994 210.366  1.00  0.00           C
ATOM   1690  HA  ARG X 108     183.518 126.702 211.193  1.00  0.00           H
ATOM   1691  CB  ARG X 108     182.329 126.169 209.451  1.00  0.00           C
ATOM   1692  HB2 ARG X 108     182.560 125.553 208.582  1.00  0.00           H
ATOM   1693  HB3 ARG X 108     181.489 125.774 210.022  1.00  0.00           H
ATOM   1694  CG  ARG X 108     182.054 127.576 208.934  1.00  0.00           C
ATOM   1695  HG2 ARG X 108     182.774 127.716 208.128  1.00  0.00           H
ATOM   1696  HG3 ARG X 108     181.113 127.639 208.387  1.00  0.00           H
ATOM   1697  CD  ARG X 108     182.057 128.690 209.990  1.00  0.00           C
ATOM   1698  HD2 ARG X 108     182.946 128.774 210.615  1.00  0.00           H
ATOM   1699  HD3 ARG X 108     181.956 129.621 209.433  1.00  0.00           H
ATOM   1700  NE  ARG X 108     180.904 128.610 210.959  1.00  0.00           N
ATOM   1701  HE  ARG X 108     179.980 128.772 210.585  1.00  0.00           H
ATOM   1702  CZ  ARG X 108     180.859 128.131 212.207  1.00  0.00           C
ATOM   1703  NH1 ARG X 108     181.857 127.990 213.037  1.00  0.00           N
ATOM   1704 HH11 ARG X 108     182.748 128.451 212.917  1.00  0.00           H
ATOM   1705 HH12 ARG X 108     181.583 127.691 213.962  1.00  0.00           H
ATOM   1706  NH2 ARG X 108     179.646 127.768 212.527  1.00  0.00           N
ATOM   1707 HH21 ARG X 108     178.946 127.898 211.811  1.00  0.00           H
ATOM   1708 HH22 ARG X 108     179.467 127.494 213.482  1.00  0.00           H
ATOM   1709  C   ARG X 108     183.674 124.538 210.930  1.00  0.00           C
ATOM   1710  O   ARG X 108     183.249 124.281 212.038  1.00  0.00           O
ATOM   1711  N   GLY X 109     184.181 123.644 210.126  1.00  0.00           N
ATOM   1712  H   GLY X 109     184.371 123.849 209.156  1.00  0.00           H
ATOM   1713  CA  GLY X 109     184.582 122.254 210.536  1.00  0.00           C
ATOM   1714  HA2 GLY X 109     183.758 121.651 210.919  1.00  0.00           H
ATOM   1715  HA3 GLY X 109     184.899 121.675 209.669  1.00  0.00           H
ATOM   1716  C   GLY X 109     185.704 122.180 211.564  1.00  0.00           C
ATOM   1717  O   GLY X 109     185.796 121.088 212.027  1.00  0.00           O
ATOM   1718  N   PHE X 110     186.355 123.270 211.998  1.00  0.00           N
ATOM   1719  H   PHE X 110     186.320 124.148 211.500  1.00  0.00           H
ATOM   1720  CA  PHE X 110     187.093 123.210 213.246  1.00  0.00           C
ATOM   1721  HA  PHE X 110     187.456 122.203 213.450  1.00  0.00           H
ATOM   1722  CB  PHE X 110     188.250 124.145 213.065  1.00  0.00           C
ATOM   1723  HB2 PHE X 110     187.826 124.991 212.523  1.00  0.00           H
ATOM   1724  HB3 PHE X 110     188.620 124.419 214.052  1.00  0.00           H
ATOM   1725  CG  PHE X 110     189.506 123.616 212.335  1.00  0.00           C
ATOM   1726  CD1 PHE X 110     189.281 123.438 210.973  1.00  0.00           C
ATOM   1727  HD1 PHE X 110     188.305 123.612 210.544  1.00  0.00           H
ATOM   1728  CE1 PHE X 110     190.338 122.882 210.235  1.00  0.00           C
ATOM   1729  HE1 PHE X 110     190.134 122.705 209.190  1.00  0.00           H
ATOM   1730  CZ  PHE X 110     191.680 122.788 210.748  1.00  0.00           C
ATOM   1731  HZ  PHE X 110     192.501 122.636 210.063  1.00  0.00           H
ATOM   1732  CE2 PHE X 110     191.918 123.121 212.121  1.00  0.00           C
ATOM   1733  HE2 PHE X 110     192.914 123.267 212.512  1.00  0.00           H
ATOM   1734  CD2 PHE X 110     190.819 123.480 212.909  1.00  0.00           C
ATOM   1735  HD2 PHE X 110     190.993 123.704 213.951  1.00  0.00           H
ATOM   1736  C   PHE X 110     186.214 123.482 214.457  1.00  0.00           C
ATOM   1737  O   PHE X 110     186.781 123.336 215.571  1.00  0.00           O
ATOM   1738  N   GLY X 111     184.850 123.767 214.353  1.00  0.00           N
ATOM   1739  H   GLY X 111     184.460 123.925 213.435  1.00  0.00           H
ATOM   1740  CA  GLY X 111     183.934 123.774 215.497  1.00  0.00           C
ATOM   1741  HA2 GLY X 111     184.457 123.908 216.444  1.00  0.00           H
ATOM   1742  HA3 GLY X 111     183.406 124.717 215.357  1.00  0.00           H
ATOM   1743  C   GLY X 111     183.149 122.495 215.609  1.00  0.00           C
ATOM   1744  O   GLY X 111     183.793 121.465 215.394  1.00  0.00           O
ATOM   1745  N   ILE X 112     181.882 122.543 216.007  1.00  0.00           N
ATOM   1746  H   ILE X 112     181.439 123.451 216.025  1.00  0.00           H
ATOM   1747  CA  ILE X 112     181.134 121.406 216.582  1.00  0.00           C
ATOM   1748  HA  ILE X 112     181.551 120.470 216.211  1.00  0.00           H
ATOM   1749  CB  ILE X 112     181.136 121.409 218.089  1.00  0.00           C
ATOM   1750  HB  ILE X 112     182.168 121.190 218.365  1.00  0.00           H
ATOM   1751  CG2 ILE X 112     180.747 122.708 218.803  1.00  0.00           C
ATOM   1752 HG21 ILE X 112     181.385 123.506 218.425  1.00  0.00           H
ATOM   1753 HG22 ILE X 112     180.932 122.758 219.876  1.00  0.00           H
ATOM   1754 HG23 ILE X 112     179.699 122.969 218.653  1.00  0.00           H
ATOM   1755  CG1 ILE X 112     180.191 120.395 218.680  1.00  0.00           C
ATOM   1756 HG12 ILE X 112     179.149 120.613 218.448  1.00  0.00           H
ATOM   1757 HG13 ILE X 112     180.428 119.453 218.184  1.00  0.00           H
ATOM   1758  CD1 ILE X 112     180.370 120.139 220.207  1.00  0.00           C
ATOM   1759 HD11 ILE X 112     179.959 119.139 220.350  1.00  0.00           H
ATOM   1760 HD12 ILE X 112     179.605 120.790 220.630  1.00  0.00           H
ATOM   1761 HD13 ILE X 112     181.426 120.301 220.425  1.00  0.00           H
ATOM   1762  C   ILE X 112     179.759 121.172 215.863  1.00  0.00           C
ATOM   1763  O   ILE X 112     179.368 120.007 215.587  1.00  0.00           O
ATOM   1764  N   VAL X 113     178.985 122.278 215.665  1.00  0.00           N
ATOM   1765  H   VAL X 113     179.483 123.156 215.632  1.00  0.00           H
ATOM   1766  CA  VAL X 113     177.625 122.194 215.110  1.00  0.00           C
ATOM   1767  HA  VAL X 113     176.967 121.615 215.757  1.00  0.00           H
ATOM   1768  CB  VAL X 113     177.038 123.655 215.152  1.00  0.00           C
ATOM   1769  HB  VAL X 113     177.708 124.340 214.631  1.00  0.00           H
ATOM   1770  CG1 VAL X 113     175.807 123.678 214.325  1.00  0.00           C
ATOM   1771 HG11 VAL X 113     175.334 124.660 214.317  1.00  0.00           H
ATOM   1772 HG12 VAL X 113     175.922 123.501 213.255  1.00  0.00           H
ATOM   1773 HG13 VAL X 113     175.042 123.032 214.754  1.00  0.00           H
ATOM   1774  CG2 VAL X 113     176.707 124.269 216.524  1.00  0.00           C
ATOM   1775 HG21 VAL X 113     177.615 124.340 217.123  1.00  0.00           H
ATOM   1776 HG22 VAL X 113     175.980 123.628 217.022  1.00  0.00           H
ATOM   1777 HG23 VAL X 113     176.334 125.293 216.517  1.00  0.00           H
ATOM   1778  C   VAL X 113     177.608 121.691 213.643  1.00  0.00           C
ATOM   1779  O   VAL X 113     176.743 120.938 213.269  1.00  0.00           O
ATOM   1780  N   PHE X 114     178.563 122.142 212.800  1.00  0.00           N
ATOM   1781  H   PHE X 114     179.267 122.688 213.276  1.00  0.00           H
ATOM   1782  CA  PHE X 114     178.689 121.799 211.320  1.00  0.00           C
ATOM   1783  HA  PHE X 114     177.809 121.256 210.973  1.00  0.00           H
ATOM   1784  CB  PHE X 114     178.788 123.143 210.555  1.00  0.00           C
ATOM   1785  HB2 PHE X 114     179.681 123.614 210.966  1.00  0.00           H
ATOM   1786  HB3 PHE X 114     178.991 122.940 209.504  1.00  0.00           H
ATOM   1787  CG  PHE X 114     177.641 124.071 210.801  1.00  0.00           C
ATOM   1788  CD1 PHE X 114     176.393 123.838 210.249  1.00  0.00           C
ATOM   1789  HD1 PHE X 114     176.219 122.985 209.610  1.00  0.00           H
ATOM   1790  CE1 PHE X 114     175.292 124.697 210.588  1.00  0.00           C
ATOM   1791  HE1 PHE X 114     174.356 124.625 210.055  1.00  0.00           H
ATOM   1792  CZ  PHE X 114     175.492 125.750 211.475  1.00  0.00           C
ATOM   1793  HZ  PHE X 114     174.657 126.357 211.791  1.00  0.00           H
ATOM   1794  CE2 PHE X 114     176.754 125.993 212.083  1.00  0.00           C
ATOM   1795  HE2 PHE X 114     176.965 126.768 212.805  1.00  0.00           H
ATOM   1796  CD2 PHE X 114     177.818 125.129 211.734  1.00  0.00           C
ATOM   1797  HD2 PHE X 114     178.821 125.310 212.094  1.00  0.00           H
ATOM   1798  C   PHE X 114     179.896 120.877 210.993  1.00  0.00           C
ATOM   1799  O   PHE X 114     179.781 120.156 210.031  1.00  0.00           O
ATOM   1800  N   SER X 115     180.910 120.722 211.896  1.00  0.00           N
ATOM   1801  H   SER X 115     180.800 121.218 212.769  1.00  0.00           H
ATOM   1802  CA  SER X 115     181.941 119.693 211.857  1.00  0.00           C
ATOM   1803  HA  SER X 115     182.483 119.791 210.917  1.00  0.00           H
ATOM   1804  CB  SER X 115     182.799 120.002 213.082  1.00  0.00           C
ATOM   1805  HB2 SER X 115     183.354 120.940 213.054  1.00  0.00           H
ATOM   1806  HB3 SER X 115     182.277 119.956 214.038  1.00  0.00           H
ATOM   1807  OG  SER X 115     183.875 119.067 213.115  1.00  0.00           O
ATOM   1808  HG  SER X 115     184.693 119.532 213.304  1.00  0.00           H
ATOM   1809  C   SER X 115     181.430 118.231 211.926  1.00  0.00           C
ATOM   1810  O   SER X 115     180.433 117.974 212.574  1.00  0.00           O
ATOM   1811  N   ASN X 116     182.133 117.287 211.320  1.00  0.00           N
ATOM   1812  H   ASN X 116     182.940 117.519 210.758  1.00  0.00           H
ATOM   1813  CA  ASN X 116     181.823 115.869 211.389  1.00  0.00           C
ATOM   1814  HA  ASN X 116     181.098 115.656 212.174  1.00  0.00           H
ATOM   1815  CB  ASN X 116     181.274 115.444 210.008  1.00  0.00           C
ATOM   1816  HB2 ASN X 116     182.042 115.624 209.257  1.00  0.00           H
ATOM   1817  HB3 ASN X 116     181.117 114.366 209.956  1.00  0.00           H
ATOM   1818  CG  ASN X 116     180.024 116.182 209.498  1.00  0.00           C
ATOM   1819  OD1 ASN X 116     178.895 115.961 209.971  1.00  0.00           O
ATOM   1820  ND2 ASN X 116     180.156 117.130 208.540  1.00  0.00           N
ATOM   1821 HD21 ASN X 116     181.054 117.181 208.081  1.00  0.00           H
ATOM   1822 HD22 ASN X 116     179.503 117.899 208.492  1.00  0.00           H
ATOM   1823  C   ASN X 116     183.051 114.953 211.752  1.00  0.00           C
ATOM   1824  O   ASN X 116     184.205 115.430 211.782  1.00  0.00           O
ATOM   1825  N   GLY X 117     182.918 113.681 212.013  1.00  0.00           N
ATOM   1826  H   GLY X 117     182.011 113.263 211.866  1.00  0.00           H
ATOM   1827  CA  GLY X 117     183.998 112.722 212.111  1.00  0.00           C
ATOM   1828  HA2 GLY X 117     183.696 111.686 211.956  1.00  0.00           H
ATOM   1829  HA3 GLY X 117     184.661 113.026 211.302  1.00  0.00           H
ATOM   1830  C   GLY X 117     184.727 112.826 213.463  1.00  0.00           C
ATOM   1831  O   GLY X 117     184.323 113.478 214.445  1.00  0.00           O
ATOM   1832  N   LYS X 118     185.873 112.091 213.465  1.00  0.00           N
ATOM   1833  H   LYS X 118     186.123 111.463 212.715  1.00  0.00           H
ATOM   1834  CA  LYS X 118     186.855 112.210 214.570  1.00  0.00           C
ATOM   1835  HA  LYS X 118     186.352 111.841 215.464  1.00  0.00           H
ATOM   1836  CB  LYS X 118     187.961 111.163 214.289  1.00  0.00           C
ATOM   1837  HB2 LYS X 118     188.594 111.043 215.169  1.00  0.00           H
ATOM   1838  HB3 LYS X 118     187.514 110.184 214.113  1.00  0.00           H
ATOM   1839  CG  LYS X 118     188.811 111.562 213.040  1.00  0.00           C
ATOM   1840  HG2 LYS X 118     188.202 111.506 212.137  1.00  0.00           H
ATOM   1841  HG3 LYS X 118     189.065 112.611 213.189  1.00  0.00           H
ATOM   1842  CD  LYS X 118     190.036 110.710 212.800  1.00  0.00           C
ATOM   1843  HD2 LYS X 118     189.677 109.758 212.410  1.00  0.00           H
ATOM   1844  HD3 LYS X 118     190.615 111.200 212.017  1.00  0.00           H
ATOM   1845  CE  LYS X 118     190.902 110.336 213.987  1.00  0.00           C
ATOM   1846  HE2 LYS X 118     190.329 109.969 214.838  1.00  0.00           H
ATOM   1847  HE3 LYS X 118     191.541 109.544 213.596  1.00  0.00           H
ATOM   1848  NZ  LYS X 118     191.659 111.522 214.358  1.00  0.00           N
ATOM   1849  HZ1 LYS X 118     190.997 112.271 214.503  1.00  0.00           H
ATOM   1850  HZ2 LYS X 118     192.281 111.838 213.627  1.00  0.00           H
ATOM   1851  HZ3 LYS X 118     192.151 111.415 215.234  1.00  0.00           H
ATOM   1852  C   LYS X 118     187.253 113.666 214.988  1.00  0.00           C
ATOM   1853  O   LYS X 118     187.491 113.876 216.186  1.00  0.00           O
ATOM   1854  N   LYS X 119     187.329 114.511 214.049  1.00  0.00           N
ATOM   1855  H   LYS X 119     187.292 114.162 213.102  1.00  0.00           H
ATOM   1856  CA  LYS X 119     187.359 115.937 214.335  1.00  0.00           C
ATOM   1857  HA  LYS X 119     188.290 116.176 214.851  1.00  0.00           H
ATOM   1858  CB  LYS X 119     187.455 116.587 213.017  1.00  0.00           C
ATOM   1859  HB2 LYS X 119     188.226 116.084 212.434  1.00  0.00           H
ATOM   1860  HB3 LYS X 119     186.512 116.430 212.494  1.00  0.00           H
ATOM   1861  CG  LYS X 119     187.810 118.052 213.080  1.00  0.00           C
ATOM   1862  HG2 LYS X 119     186.957 118.603 213.477  1.00  0.00           H
ATOM   1863  HG3 LYS X 119     188.622 118.176 213.796  1.00  0.00           H
ATOM   1864  CD  LYS X 119     188.308 118.504 211.787  1.00  0.00           C
ATOM   1865  HD2 LYS X 119     189.167 117.940 211.422  1.00  0.00           H
ATOM   1866  HD3 LYS X 119     187.538 118.434 211.019  1.00  0.00           H
ATOM   1867  CE  LYS X 119     188.800 119.956 211.872  1.00  0.00           C
ATOM   1868  HE2 LYS X 119     188.860 120.368 210.864  1.00  0.00           H
ATOM   1869  HE3 LYS X 119     188.152 120.555 212.512  1.00  0.00           H
ATOM   1870  NZ  LYS X 119     190.149 120.107 212.505  1.00  0.00           N
ATOM   1871  HZ1 LYS X 119     190.062 119.877 213.485  1.00  0.00           H
ATOM   1872  HZ2 LYS X 119     190.536 121.038 212.453  1.00  0.00           H
ATOM   1873  HZ3 LYS X 119     190.794 119.492 212.029  1.00  0.00           H
ATOM   1874  C   LYS X 119     186.217 116.519 215.195  1.00  0.00           C
ATOM   1875  O   LYS X 119     186.470 117.358 216.106  1.00  0.00           O
ATOM   1876  N   TRP X 120     184.975 116.141 214.854  1.00  0.00           N
ATOM   1877  H   TRP X 120     184.839 115.563 214.037  1.00  0.00           H
ATOM   1878  CA  TRP X 120     183.789 116.518 215.650  1.00  0.00           C
ATOM   1879  HA  TRP X 120     183.822 117.600 215.783  1.00  0.00           H
ATOM   1880  CB  TRP X 120     182.566 116.348 214.811  1.00  0.00           C
ATOM   1881  HB2 TRP X 120     182.302 117.274 214.301  1.00  0.00           H
ATOM   1882  HB3 TRP X 120     182.731 115.435 214.239  1.00  0.00           H
ATOM   1883  CG  TRP X 120     181.325 116.204 215.562  1.00  0.00           C
ATOM   1884  CD1 TRP X 120     180.733 117.216 216.236  1.00  0.00           C
ATOM   1885  HD1 TRP X 120     181.194 118.192 216.236  1.00  0.00           H
ATOM   1886  NE1 TRP X 120     179.661 116.766 216.994  1.00  0.00           N
ATOM   1887  HE1 TRP X 120     178.981 117.459 217.273  1.00  0.00           H
ATOM   1888  CE2 TRP X 120     179.441 115.422 216.747  1.00  0.00           C
ATOM   1889  CZ2 TRP X 120     178.418 114.558 217.187  1.00  0.00           C
ATOM   1890  HZ2 TRP X 120     177.631 114.799 217.885  1.00  0.00           H
ATOM   1891  CH2 TRP X 120     178.341 113.270 216.619  1.00  0.00           C
ATOM   1892  HH2 TRP X 120     177.534 112.565 216.757  1.00  0.00           H
ATOM   1893  CZ3 TRP X 120     179.325 112.874 215.656  1.00  0.00           C
ATOM   1894  HZ3 TRP X 120     179.420 111.832 215.389  1.00  0.00           H
ATOM   1895  CE3 TRP X 120     180.320 113.761 215.312  1.00  0.00           C
ATOM   1896  HE3 TRP X 120     180.995 113.372 214.564  1.00  0.00           H
ATOM   1897  CD2 TRP X 120     180.387 115.064 215.797  1.00  0.00           C
ATOM   1898  C   TRP X 120     183.715 115.904 217.039  1.00  0.00           C
ATOM   1899  O   TRP X 120     183.608 116.656 218.004  1.00  0.00           O
ATOM   1900  N   LYS X 121     183.928 114.593 217.055  1.00  0.00           N
ATOM   1901  H   LYS X 121     184.134 114.230 216.135  1.00  0.00           H
ATOM   1902  CA  LYS X 121     183.861 113.819 218.324  1.00  0.00           C
ATOM   1903  HA  LYS X 121     182.866 113.998 218.731  1.00  0.00           H
ATOM   1904  CB  LYS X 121     183.954 112.311 218.106  1.00  0.00           C
ATOM   1905  HB2 LYS X 121     184.896 112.113 217.595  1.00  0.00           H
ATOM   1906  HB3 LYS X 121     183.971 111.914 219.121  1.00  0.00           H
ATOM   1907  CG  LYS X 121     182.785 111.864 217.216  1.00  0.00           C
ATOM   1908  HG2 LYS X 121     181.858 112.211 217.671  1.00  0.00           H
ATOM   1909  HG3 LYS X 121     182.692 112.293 216.218  1.00  0.00           H
ATOM   1910  CD  LYS X 121     182.800 110.392 216.991  1.00  0.00           C
ATOM   1911  HD2 LYS X 121     183.815 110.086 216.737  1.00  0.00           H
ATOM   1912  HD3 LYS X 121     182.564 109.863 217.914  1.00  0.00           H
ATOM   1913  CE  LYS X 121     181.772 109.932 215.983  1.00  0.00           C
ATOM   1914  HE2 LYS X 121     180.749 110.112 216.314  1.00  0.00           H
ATOM   1915  HE3 LYS X 121     181.861 110.476 215.043  1.00  0.00           H
ATOM   1916  NZ  LYS X 121     181.899 108.491 215.646  1.00  0.00           N
ATOM   1917  HZ1 LYS X 121     182.003 107.931 216.480  1.00  0.00           H
ATOM   1918  HZ2 LYS X 121     182.776 108.424 215.150  1.00  0.00           H
ATOM   1919  HZ3 LYS X 121     181.099 108.204 215.101  1.00  0.00           H
ATOM   1920  C   LYS X 121     184.815 114.263 219.468  1.00  0.00           C
ATOM   1921  O   LYS X 121     184.398 114.363 220.616  1.00  0.00           O
ATOM   1922  N   GLU X 122     186.050 114.493 219.125  1.00  0.00           N
ATOM   1923  H   GLU X 122     186.420 114.513 218.186  1.00  0.00           H
ATOM   1924  CA  GLU X 122     186.987 114.925 220.181  1.00  0.00           C
ATOM   1925  HA  GLU X 122     187.074 114.165 220.957  1.00  0.00           H
ATOM   1926  CB  GLU X 122     188.388 115.035 219.538  1.00  0.00           C
ATOM   1927  HB2 GLU X 122     188.313 115.682 218.663  1.00  0.00           H
ATOM   1928  HB3 GLU X 122     189.063 115.624 220.159  1.00  0.00           H
ATOM   1929  CG  GLU X 122     189.047 113.707 219.150  1.00  0.00           C
ATOM   1930  HG2 GLU X 122     188.283 112.988 218.856  1.00  0.00           H
ATOM   1931  HG3 GLU X 122     189.711 113.786 218.289  1.00  0.00           H
ATOM   1932  CD  GLU X 122     189.863 113.181 220.379  1.00  0.00           C
ATOM   1933  OE1 GLU X 122     191.084 113.202 220.318  1.00  0.00           O
ATOM   1934  OE2 GLU X 122     189.224 112.864 221.436  1.00  0.00           O
ATOM   1935  C   GLU X 122     186.495 116.238 220.860  1.00  0.00           C
ATOM   1936  O   GLU X 122     186.596 116.376 222.080  1.00  0.00           O
ATOM   1937  N   ILE X 123     186.008 117.169 220.002  1.00  0.00           N
ATOM   1938  H   ILE X 123     186.136 117.094 219.003  1.00  0.00           H
ATOM   1939  CA  ILE X 123     185.535 118.482 220.493  1.00  0.00           C
ATOM   1940  HA  ILE X 123     186.220 118.845 221.259  1.00  0.00           H
ATOM   1941  CB  ILE X 123     185.462 119.447 219.307  1.00  0.00           C
ATOM   1942  HB  ILE X 123     184.981 118.976 218.451  1.00  0.00           H
ATOM   1943  CG2 ILE X 123     184.782 120.767 219.492  1.00  0.00           C
ATOM   1944 HG21 ILE X 123     183.795 120.664 219.943  1.00  0.00           H
ATOM   1945 HG22 ILE X 123     184.566 121.265 218.546  1.00  0.00           H
ATOM   1946 HG23 ILE X 123     185.188 121.583 220.089  1.00  0.00           H
ATOM   1947  CG1 ILE X 123     186.825 119.770 218.814  1.00  0.00           C
ATOM   1948 HG12 ILE X 123     187.438 118.873 218.729  1.00  0.00           H
ATOM   1949 HG13 ILE X 123     186.715 120.166 217.804  1.00  0.00           H
ATOM   1950  CD1 ILE X 123     187.654 120.805 219.605  1.00  0.00           C
ATOM   1951 HD11 ILE X 123     188.648 120.665 219.179  1.00  0.00           H
ATOM   1952 HD12 ILE X 123     187.709 120.590 220.672  1.00  0.00           H
ATOM   1953 HD13 ILE X 123     187.311 121.801 219.324  1.00  0.00           H
ATOM   1954  C   ILE X 123     184.157 118.471 221.156  1.00  0.00           C
ATOM   1955  O   ILE X 123     184.020 119.109 222.230  1.00  0.00           O
ATOM   1956  N   ARG X 124     183.277 117.606 220.744  1.00  0.00           N
ATOM   1957  H   ARG X 124     183.492 117.094 219.900  1.00  0.00           H
ATOM   1958  CA  ARG X 124     182.119 117.152 221.484  1.00  0.00           C
ATOM   1959  HA  ARG X 124     181.453 117.952 221.808  1.00  0.00           H
ATOM   1960  CB  ARG X 124     181.307 116.230 220.622  1.00  0.00           C
ATOM   1961  HB2 ARG X 124     181.049 116.576 219.621  1.00  0.00           H
ATOM   1962  HB3 ARG X 124     181.827 115.274 220.559  1.00  0.00           H
ATOM   1963  CG  ARG X 124     179.978 115.959 221.286  1.00  0.00           C
ATOM   1964  HG2 ARG X 124     180.187 115.481 222.243  1.00  0.00           H
ATOM   1965  HG3 ARG X 124     179.453 116.911 221.369  1.00  0.00           H
ATOM   1966  CD  ARG X 124     179.223 114.966 220.477  1.00  0.00           C
ATOM   1967  HD2 ARG X 124     179.001 115.375 219.492  1.00  0.00           H
ATOM   1968  HD3 ARG X 124     179.842 114.086 220.304  1.00  0.00           H
ATOM   1969  NE  ARG X 124     177.992 114.584 221.156  1.00  0.00           N
ATOM   1970  HE  ARG X 124     178.104 114.135 222.054  1.00  0.00           H
ATOM   1971  CZ  ARG X 124     176.792 115.167 221.029  1.00  0.00           C
ATOM   1972  NH1 ARG X 124     176.617 116.105 220.135  1.00  0.00           N
ATOM   1973 HH11 ARG X 124     177.396 116.493 219.623  1.00  0.00           H
ATOM   1974 HH12 ARG X 124     175.753 116.625 220.082  1.00  0.00           H
ATOM   1975  NH2 ARG X 124     175.753 114.935 221.799  1.00  0.00           N
ATOM   1976 HH21 ARG X 124     175.841 114.154 222.433  1.00  0.00           H
ATOM   1977 HH22 ARG X 124     174.895 115.352 221.468  1.00  0.00           H
ATOM   1978  C   ARG X 124     182.506 116.587 222.929  1.00  0.00           C
ATOM   1979  O   ARG X 124     181.923 117.071 223.846  1.00  0.00           O
ATOM   1980  N   ARG X 125     183.461 115.631 223.006  1.00  0.00           N
ATOM   1981  H   ARG X 125     183.928 115.361 222.152  1.00  0.00           H
ATOM   1982  CA  ARG X 125     183.925 115.180 224.323  1.00  0.00           C
ATOM   1983  HA  ARG X 125     183.052 114.772 224.833  1.00  0.00           H
ATOM   1984  CB  ARG X 125     184.996 114.034 224.337  1.00  0.00           C
ATOM   1985  HB2 ARG X 125     185.959 114.398 223.980  1.00  0.00           H
ATOM   1986  HB3 ARG X 125     185.127 113.767 225.386  1.00  0.00           H
ATOM   1987  CG  ARG X 125     184.413 112.790 223.720  1.00  0.00           C
ATOM   1988  HG2 ARG X 125     183.579 112.455 224.336  1.00  0.00           H
ATOM   1989  HG3 ARG X 125     184.024 113.070 222.741  1.00  0.00           H
ATOM   1990  CD  ARG X 125     185.363 111.591 223.735  1.00  0.00           C
ATOM   1991  HD2 ARG X 125     185.856 111.675 224.703  1.00  0.00           H
ATOM   1992  HD3 ARG X 125     184.919 110.597 223.680  1.00  0.00           H
ATOM   1993  NE  ARG X 125     186.264 111.712 222.675  1.00  0.00           N
ATOM   1994  HE  ARG X 125     187.111 112.252 222.781  1.00  0.00           H
ATOM   1995  CZ  ARG X 125     186.352 110.887 221.643  1.00  0.00           C
ATOM   1996  NH1 ARG X 125     185.482 109.960 221.450  1.00  0.00           N
ATOM   1997 HH11 ARG X 125     184.558 110.166 221.803  1.00  0.00           H
ATOM   1998 HH12 ARG X 125     185.621 109.531 220.547  1.00  0.00           H
ATOM   1999  NH2 ARG X 125     187.475 110.848 220.997  1.00  0.00           N
ATOM   2000 HH21 ARG X 125     188.159 111.575 221.150  1.00  0.00           H
ATOM   2001 HH22 ARG X 125     187.725 110.087 220.382  1.00  0.00           H
ATOM   2002  C   ARG X 125     184.309 116.292 225.244  1.00  0.00           C
ATOM   2003  O   ARG X 125     183.781 116.318 226.361  1.00  0.00           O
ATOM   2004  N   PHE X 126     185.199 117.156 224.817  1.00  0.00           N
ATOM   2005  H   PHE X 126     185.553 116.926 223.899  1.00  0.00           H
ATOM   2006  CA  PHE X 126     185.680 118.283 225.568  1.00  0.00           C
ATOM   2007  HA  PHE X 126     186.072 117.910 226.515  1.00  0.00           H
ATOM   2008  CB  PHE X 126     186.898 118.822 224.799  1.00  0.00           C
ATOM   2009  HB2 PHE X 126     187.663 118.052 224.699  1.00  0.00           H
ATOM   2010  HB3 PHE X 126     186.446 119.211 223.886  1.00  0.00           H
ATOM   2011  CG  PHE X 126     187.439 120.030 225.561  1.00  0.00           C
ATOM   2012  CD1 PHE X 126     188.457 119.868 226.518  1.00  0.00           C
ATOM   2013  HD1 PHE X 126     188.839 118.858 226.518  1.00  0.00           H
ATOM   2014  CE1 PHE X 126     188.963 120.839 227.364  1.00  0.00           C
ATOM   2015  HE1 PHE X 126     189.848 120.594 227.933  1.00  0.00           H
ATOM   2016  CZ  PHE X 126     188.359 122.133 227.279  1.00  0.00           C
ATOM   2017  HZ  PHE X 126     188.739 122.920 227.915  1.00  0.00           H
ATOM   2018  CE2 PHE X 126     187.400 122.417 226.278  1.00  0.00           C
ATOM   2019  HE2 PHE X 126     186.920 123.384 226.284  1.00  0.00           H
ATOM   2020  CD2 PHE X 126     186.962 121.383 225.419  1.00  0.00           C
ATOM   2021  HD2 PHE X 126     186.261 121.539 224.612  1.00  0.00           H
ATOM   2022  C   PHE X 126     184.627 119.325 225.969  1.00  0.00           C
ATOM   2023  O   PHE X 126     184.486 119.823 227.074  1.00  0.00           O
ATOM   2024  N   SER X 127     183.767 119.670 225.015  1.00  0.00           N
ATOM   2025  H   SER X 127     183.895 119.188 224.137  1.00  0.00           H
ATOM   2026  CA  SER X 127     182.689 120.591 225.159  1.00  0.00           C
ATOM   2027  HA  SER X 127     183.061 121.530 225.569  1.00  0.00           H
ATOM   2028  CB  SER X 127     182.059 121.109 223.834  1.00  0.00           C
ATOM   2029  HB2 SER X 127     181.549 120.236 223.426  1.00  0.00           H
ATOM   2030  HB3 SER X 127     181.361 121.929 224.001  1.00  0.00           H
ATOM   2031  OG  SER X 127     183.125 121.494 223.005  1.00  0.00           O
ATOM   2032  HG  SER X 127     183.558 120.687 222.716  1.00  0.00           H
ATOM   2033  C   SER X 127     181.528 120.005 226.051  1.00  0.00           C
ATOM   2034  O   SER X 127     181.024 120.725 226.869  1.00  0.00           O
ATOM   2035  N   LEU X 128     181.083 118.770 225.798  1.00  0.00           N
ATOM   2036  H   LEU X 128     181.541 118.107 225.190  1.00  0.00           H
ATOM   2037  CA  LEU X 128     180.034 118.172 226.728  1.00  0.00           C
ATOM   2038  HA  LEU X 128     179.125 118.772 226.764  1.00  0.00           H
ATOM   2039  CB  LEU X 128     179.466 116.855 226.150  1.00  0.00           C
ATOM   2040  HB2 LEU X 128     178.921 117.129 225.247  1.00  0.00           H
ATOM   2041  HB3 LEU X 128     180.332 116.203 226.036  1.00  0.00           H
ATOM   2042  CG  LEU X 128     178.457 115.995 227.028  1.00  0.00           C
ATOM   2043  HG  LEU X 128     178.998 115.723 227.933  1.00  0.00           H
ATOM   2044  CD1 LEU X 128     177.088 116.511 227.320  1.00  0.00           C
ATOM   2045 HD11 LEU X 128     176.437 115.689 227.618  1.00  0.00           H
ATOM   2046 HD12 LEU X 128     176.584 116.909 226.439  1.00  0.00           H
ATOM   2047 HD13 LEU X 128     177.203 117.234 228.127  1.00  0.00           H
ATOM   2048  CD2 LEU X 128     178.155 114.678 226.187  1.00  0.00           C
ATOM   2049 HD21 LEU X 128     177.798 114.897 225.180  1.00  0.00           H
ATOM   2050 HD22 LEU X 128     179.115 114.164 226.134  1.00  0.00           H
ATOM   2051 HD23 LEU X 128     177.463 114.047 226.744  1.00  0.00           H
ATOM   2052  C   LEU X 128     180.591 118.031 228.163  1.00  0.00           C
ATOM   2053  O   LEU X 128     179.816 118.159 229.062  1.00  0.00           O
ATOM   2054  N   MET X 129     181.897 117.706 228.364  1.00  0.00           N
ATOM   2055  H   MET X 129     182.473 117.492 227.563  1.00  0.00           H
ATOM   2056  CA  MET X 129     182.403 117.487 229.666  1.00  0.00           C
ATOM   2057  HA  MET X 129     181.675 116.876 230.200  1.00  0.00           H
ATOM   2058  CB  MET X 129     183.609 116.588 229.686  1.00  0.00           C
ATOM   2059  HB2 MET X 129     183.774 116.254 230.711  1.00  0.00           H
ATOM   2060  HB3 MET X 129     183.451 115.702 229.070  1.00  0.00           H
ATOM   2061  CG  MET X 129     184.901 117.212 229.240  1.00  0.00           C
ATOM   2062  HG2 MET X 129     184.687 117.447 228.198  1.00  0.00           H
ATOM   2063  HG3 MET X 129     185.120 118.173 229.705  1.00  0.00           H
ATOM   2064  SD  MET X 129     186.428 116.217 229.433  1.00  0.00           S
ATOM   2065  CE  MET X 129     185.885 114.751 228.457  1.00  0.00           C
ATOM   2066  HE1 MET X 129     185.026 114.264 228.917  1.00  0.00           H
ATOM   2067  HE2 MET X 129     185.771 115.179 227.461  1.00  0.00           H
ATOM   2068  HE3 MET X 129     186.798 114.156 228.462  1.00  0.00           H
ATOM   2069  C   MET X 129     182.556 118.846 230.443  1.00  0.00           C
ATOM   2070  O   MET X 129     182.277 118.976 231.624  1.00  0.00           O
ATOM   2071  N   THR X 130     182.953 119.953 229.732  1.00  0.00           N
ATOM   2072  H   THR X 130     183.058 119.869 228.731  1.00  0.00           H
ATOM   2073  CA  THR X 130     183.213 121.276 230.295  1.00  0.00           C
ATOM   2074  HA  THR X 130     183.673 121.216 231.281  1.00  0.00           H
ATOM   2075  CB  THR X 130     184.197 122.208 229.582  1.00  0.00           C
ATOM   2076  HB  THR X 130     184.087 123.175 230.073  1.00  0.00           H
ATOM   2077  CG2 THR X 130     185.669 121.725 229.635  1.00  0.00           C
ATOM   2078 HG21 THR X 130     185.805 121.149 230.551  1.00  0.00           H
ATOM   2079 HG22 THR X 130     186.321 122.588 229.501  1.00  0.00           H
ATOM   2080 HG23 THR X 130     185.877 121.082 228.779  1.00  0.00           H
ATOM   2081  OG1 THR X 130     183.743 122.338 228.250  1.00  0.00           O
ATOM   2082  HG1 THR X 130     184.127 121.670 227.678  1.00  0.00           H
ATOM   2083  C   THR X 130     181.869 121.989 230.650  1.00  0.00           C
ATOM   2084  O   THR X 130     181.553 122.490 231.708  1.00  0.00           O
ATOM   2085  N   LEU X 131     180.883 121.766 229.767  1.00  0.00           N
ATOM   2086  H   LEU X 131     181.086 121.390 228.852  1.00  0.00           H
ATOM   2087  CA  LEU X 131     179.430 121.927 230.051  1.00  0.00           C
ATOM   2088  HA  LEU X 131     179.262 122.979 230.281  1.00  0.00           H
ATOM   2089  CB  LEU X 131     178.676 121.594 228.749  1.00  0.00           C
ATOM   2090  HB2 LEU X 131     179.190 120.784 228.231  1.00  0.00           H
ATOM   2091  HB3 LEU X 131     177.659 121.223 228.874  1.00  0.00           H
ATOM   2092  CG  LEU X 131     178.475 122.825 227.776  1.00  0.00           C
ATOM   2093  HG  LEU X 131     178.243 122.435 226.785  1.00  0.00           H
ATOM   2094  CD1 LEU X 131     177.282 123.717 228.133  1.00  0.00           C
ATOM   2095 HD11 LEU X 131     176.419 123.052 228.147  1.00  0.00           H
ATOM   2096 HD12 LEU X 131     177.012 124.444 227.368  1.00  0.00           H
ATOM   2097 HD13 LEU X 131     177.378 124.297 229.051  1.00  0.00           H
ATOM   2098  CD2 LEU X 131     179.723 123.750 227.544  1.00  0.00           C
ATOM   2099 HD21 LEU X 131     180.214 124.087 228.457  1.00  0.00           H
ATOM   2100 HD22 LEU X 131     180.369 123.067 226.992  1.00  0.00           H
ATOM   2101 HD23 LEU X 131     179.479 124.537 226.831  1.00  0.00           H
ATOM   2102  C   LEU X 131     178.873 121.057 231.229  1.00  0.00           C
ATOM   2103  O   LEU X 131     177.898 121.435 231.899  1.00  0.00           O
ATOM   2104  N   ARG X 132     179.339 119.802 231.346  1.00  0.00           N
ATOM   2105  H   ARG X 132     180.079 119.462 230.747  1.00  0.00           H
ATOM   2106  CA  ARG X 132     179.016 118.987 232.551  1.00  0.00           C
ATOM   2107  HA  ARG X 132     178.050 119.218 232.999  1.00  0.00           H
ATOM   2108  CB  ARG X 132     179.016 117.451 232.244  1.00  0.00           C
ATOM   2109  HB2 ARG X 132     179.870 117.205 231.613  1.00  0.00           H
ATOM   2110  HB3 ARG X 132     179.138 116.837 233.137  1.00  0.00           H
ATOM   2111  CG  ARG X 132     177.701 117.147 231.500  1.00  0.00           C
ATOM   2112  HG2 ARG X 132     176.807 117.321 232.101  1.00  0.00           H
ATOM   2113  HG3 ARG X 132     177.663 117.677 230.548  1.00  0.00           H
ATOM   2114  CD  ARG X 132     177.692 115.667 231.032  1.00  0.00           C
ATOM   2115  HD2 ARG X 132     178.163 115.599 230.051  1.00  0.00           H
ATOM   2116  HD3 ARG X 132     178.267 115.100 231.765  1.00  0.00           H
ATOM   2117  NE  ARG X 132     176.369 115.093 230.813  1.00  0.00           N
ATOM   2118  HE  ARG X 132     175.509 115.242 231.321  1.00  0.00           H
ATOM   2119  CZ  ARG X 132     176.243 114.086 229.967  1.00  0.00           C
ATOM   2120  NH1 ARG X 132     177.235 113.454 229.397  1.00  0.00           N
ATOM   2121 HH11 ARG X 132     178.197 113.661 229.624  1.00  0.00           H
ATOM   2122 HH12 ARG X 132     177.045 112.844 228.615  1.00  0.00           H
ATOM   2123  NH2 ARG X 132     175.097 113.646 229.533  1.00  0.00           N
ATOM   2124 HH21 ARG X 132     174.224 114.108 229.746  1.00  0.00           H
ATOM   2125 HH22 ARG X 132     175.137 112.845 228.919  1.00  0.00           H
ATOM   2126  C   ARG X 132     180.026 119.411 233.665  1.00  0.00           C
ATOM   2127  O   ARG X 132     180.548 118.558 234.394  1.00  0.00           O
ATOM   2128  N   ASN X 133     180.277 120.700 233.896  1.00  0.00           N
ATOM   2129  H   ASN X 133     179.909 121.317 233.185  1.00  0.00           H
ATOM   2130  CA  ASN X 133     181.004 121.243 235.109  1.00  0.00           C
ATOM   2131  HA  ASN X 133     181.044 122.322 234.956  1.00  0.00           H
ATOM   2132  CB  ASN X 133     180.348 120.913 236.433  1.00  0.00           C
ATOM   2133  HB2 ASN X 133     179.286 120.739 236.259  1.00  0.00           H
ATOM   2134  HB3 ASN X 133     180.698 119.962 236.835  1.00  0.00           H
ATOM   2135  CG  ASN X 133     180.282 121.936 237.537  1.00  0.00           C
ATOM   2136  OD1 ASN X 133     180.284 123.138 237.378  1.00  0.00           O
ATOM   2137  ND2 ASN X 133     180.065 121.486 238.699  1.00  0.00           N
ATOM   2138 HD21 ASN X 133     180.063 120.498 238.911  1.00  0.00           H
ATOM   2139 HD22 ASN X 133     179.776 122.248 239.295  1.00  0.00           H
ATOM   2140  C   ASN X 133     182.511 120.905 235.130  1.00  0.00           C
ATOM   2141  O   ASN X 133     183.232 121.413 236.027  1.00  0.00           O
ATOM   2142  N   PHE X 134     183.191 120.248 234.144  1.00  0.00           N
ATOM   2143  H   PHE X 134     182.712 119.958 233.304  1.00  0.00           H
ATOM   2144  CA  PHE X 134     184.652 120.075 234.213  1.00  0.00           C
ATOM   2145  HA  PHE X 134     184.754 119.594 235.185  1.00  0.00           H
ATOM   2146  CB  PHE X 134     185.173 119.122 233.144  1.00  0.00           C
ATOM   2147  HB2 PHE X 134     184.470 118.322 232.914  1.00  0.00           H
ATOM   2148  HB3 PHE X 134     185.044 119.701 232.229  1.00  0.00           H
ATOM   2149  CG  PHE X 134     186.622 118.598 233.228  1.00  0.00           C
ATOM   2150  CD1 PHE X 134     187.540 118.990 232.281  1.00  0.00           C
ATOM   2151  HD1 PHE X 134     187.238 119.644 231.477  1.00  0.00           H
ATOM   2152  CE1 PHE X 134     188.870 118.564 232.379  1.00  0.00           C
ATOM   2153  HE1 PHE X 134     189.517 118.894 231.579  1.00  0.00           H
ATOM   2154  CZ  PHE X 134     189.283 117.686 233.414  1.00  0.00           C
ATOM   2155  HZ  PHE X 134     190.314 117.371 233.473  1.00  0.00           H
ATOM   2156  CE2 PHE X 134     188.308 117.224 234.317  1.00  0.00           C
ATOM   2157  HE2 PHE X 134     188.536 116.563 235.140  1.00  0.00           H
ATOM   2158  CD2 PHE X 134     187.006 117.693 234.280  1.00  0.00           C
ATOM   2159  HD2 PHE X 134     186.280 117.353 235.004  1.00  0.00           H
ATOM   2160  C   PHE X 134     185.462 121.375 234.110  1.00  0.00           C
ATOM   2161  O   PHE X 134     185.181 122.157 233.246  1.00  0.00           O
ATOM   2162  N   GLY X 135     186.485 121.536 234.977  1.00  0.00           N
ATOM   2163  H   GLY X 135     186.620 120.888 235.740  1.00  0.00           H
ATOM   2164  CA  GLY X 135     187.354 122.737 234.872  1.00  0.00           C
ATOM   2165  HA2 GLY X 135     188.196 122.646 235.558  1.00  0.00           H
ATOM   2166  HA3 GLY X 135     187.722 122.815 233.849  1.00  0.00           H
ATOM   2167  C   GLY X 135     186.515 124.007 235.050  1.00  0.00           C
ATOM   2168  O   GLY X 135     186.838 125.007 234.464  1.00  0.00           O
ATOM   2169  N   MET X 136     185.392 123.963 235.853  1.00  0.00           N
ATOM   2170  H   MET X 136     185.105 123.096 236.283  1.00  0.00           H
ATOM   2171  CA  MET X 136     184.654 125.194 236.381  1.00  0.00           C
ATOM   2172  HA  MET X 136     184.795 126.003 235.663  1.00  0.00           H
ATOM   2173  CB  MET X 136     183.168 125.046 236.355  1.00  0.00           C
ATOM   2174  HB2 MET X 136     182.891 124.047 236.691  1.00  0.00           H
ATOM   2175  HB3 MET X 136     182.689 125.853 236.909  1.00  0.00           H
ATOM   2176  CG  MET X 136     182.395 125.087 235.009  1.00  0.00           C
ATOM   2177  HG2 MET X 136     182.596 124.158 234.475  1.00  0.00           H
ATOM   2178  HG3 MET X 136     181.351 125.240 235.280  1.00  0.00           H
ATOM   2179  SD  MET X 136     182.612 126.542 233.932  1.00  0.00           S
ATOM   2180  CE  MET X 136     183.580 125.686 232.633  1.00  0.00           C
ATOM   2181  HE1 MET X 136     184.353 125.099 233.130  1.00  0.00           H
ATOM   2182  HE2 MET X 136     183.022 125.058 231.939  1.00  0.00           H
ATOM   2183  HE3 MET X 136     184.095 126.459 232.063  1.00  0.00           H
ATOM   2184  C   MET X 136     185.165 125.646 237.736  1.00  0.00           C
ATOM   2185  O   MET X 136     184.938 126.788 238.239  1.00  0.00           O
ATOM   2186  N   GLY X 137     186.032 124.837 238.294  1.00  0.00           N
ATOM   2187  H   GLY X 137     186.098 123.962 237.792  1.00  0.00           H
ATOM   2188  CA  GLY X 137     186.891 125.155 239.467  1.00  0.00           C
ATOM   2189  HA2 GLY X 137     187.519 124.322 239.784  1.00  0.00           H
ATOM   2190  HA3 GLY X 137     187.603 125.904 239.122  1.00  0.00           H
ATOM   2191  C   GLY X 137     186.176 125.781 240.707  1.00  0.00           C
ATOM   2192  O   GLY X 137     185.440 124.998 241.265  1.00  0.00           O
ATOM   2193  N   LYS X 138     186.534 126.964 241.230  1.00  0.00           N
ATOM   2194  H   LYS X 138     187.283 127.513 240.832  1.00  0.00           H
ATOM   2195  CA  LYS X 138     185.965 127.483 242.500  1.00  0.00           C
ATOM   2196  HA  LYS X 138     185.955 126.625 243.172  1.00  0.00           H
ATOM   2197  CB  LYS X 138     186.787 128.539 243.204  1.00  0.00           C
ATOM   2198  HB2 LYS X 138     186.513 129.492 242.749  1.00  0.00           H
ATOM   2199  HB3 LYS X 138     186.346 128.555 244.200  1.00  0.00           H
ATOM   2200  CG  LYS X 138     188.264 128.231 243.389  1.00  0.00           C
ATOM   2201  HG2 LYS X 138     188.411 127.616 244.276  1.00  0.00           H
ATOM   2202  HG3 LYS X 138     188.671 127.513 242.677  1.00  0.00           H
ATOM   2203  CD  LYS X 138     189.222 129.385 243.384  1.00  0.00           C
ATOM   2204  HD2 LYS X 138     189.344 129.733 242.358  1.00  0.00           H
ATOM   2205  HD3 LYS X 138     188.844 130.194 244.009  1.00  0.00           H
ATOM   2206  CE  LYS X 138     190.527 129.036 243.929  1.00  0.00           C
ATOM   2207  HE2 LYS X 138     190.368 128.610 244.920  1.00  0.00           H
ATOM   2208  HE3 LYS X 138     190.880 128.238 243.277  1.00  0.00           H
ATOM   2209  NZ  LYS X 138     191.367 130.261 244.060  1.00  0.00           N
ATOM   2210  HZ1 LYS X 138     192.363 130.119 243.972  1.00  0.00           H
ATOM   2211  HZ2 LYS X 138     191.357 130.727 244.956  1.00  0.00           H
ATOM   2212  HZ3 LYS X 138     191.244 130.835 243.238  1.00  0.00           H
ATOM   2213  C   LYS X 138     184.453 127.810 242.508  1.00  0.00           C
ATOM   2214  O   LYS X 138     183.854 127.812 243.551  1.00  0.00           O
ATOM   2215  N   ARG X 139     183.760 127.831 241.358  1.00  0.00           N
ATOM   2216  H   ARG X 139     184.249 127.389 240.593  1.00  0.00           H
ATOM   2217  CA  ARG X 139     182.326 128.215 241.133  1.00  0.00           C
ATOM   2218  HA  ARG X 139     181.829 128.086 242.094  1.00  0.00           H
ATOM   2219  CB  ARG X 139     182.277 129.667 240.696  1.00  0.00           C
ATOM   2220  HB2 ARG X 139     182.964 129.789 239.859  1.00  0.00           H
ATOM   2221  HB3 ARG X 139     181.237 129.917 240.483  1.00  0.00           H
ATOM   2222  CG  ARG X 139     182.698 130.615 241.845  1.00  0.00           C
ATOM   2223  HG2 ARG X 139     182.101 130.450 242.743  1.00  0.00           H
ATOM   2224  HG3 ARG X 139     183.765 130.522 242.047  1.00  0.00           H
ATOM   2225  CD  ARG X 139     182.529 132.034 241.347  1.00  0.00           C
ATOM   2226  HD2 ARG X 139     183.040 132.827 241.893  1.00  0.00           H
ATOM   2227  HD3 ARG X 139     182.901 132.155 240.329  1.00  0.00           H
ATOM   2228  NE  ARG X 139     181.121 132.332 241.266  1.00  0.00           N
ATOM   2229  HE  ARG X 139     180.518 131.618 241.649  1.00  0.00           H
ATOM   2230  CZ  ARG X 139     180.434 133.286 240.624  1.00  0.00           C
ATOM   2231  NH1 ARG X 139     181.021 134.137 239.828  1.00  0.00           N
ATOM   2232 HH11 ARG X 139     182.009 134.346 239.850  1.00  0.00           H
ATOM   2233 HH12 ARG X 139     180.342 134.794 239.471  1.00  0.00           H
ATOM   2234  NH2 ARG X 139     179.150 133.184 240.598  1.00  0.00           N
ATOM   2235 HH21 ARG X 139     178.612 132.592 241.215  1.00  0.00           H
ATOM   2236 HH22 ARG X 139     178.771 133.790 239.884  1.00  0.00           H
ATOM   2237  C   ARG X 139     181.619 127.334 240.083  1.00  0.00           C
ATOM   2238  O   ARG X 139     181.980 127.383 238.910  1.00  0.00           O
ATOM   2239  N   SER X 140     180.611 126.519 240.643  1.00  0.00           N
ATOM   2240  H   SER X 140     180.308 126.798 241.565  1.00  0.00           H
ATOM   2241  CA  SER X 140     179.858 125.384 239.991  1.00  0.00           C
ATOM   2242  HA  SER X 140     180.436 124.650 239.429  1.00  0.00           H
ATOM   2243  CB  SER X 140     179.157 124.620 241.070  1.00  0.00           C
ATOM   2244  HB2 SER X 140     179.926 124.497 241.832  1.00  0.00           H
ATOM   2245  HB3 SER X 140     178.282 125.177 241.407  1.00  0.00           H
ATOM   2246  OG  SER X 140     178.651 123.408 240.478  1.00  0.00           O
ATOM   2247  HG  SER X 140     177.712 123.581 240.579  1.00  0.00           H
ATOM   2248  C   SER X 140     178.885 126.034 238.977  1.00  0.00           C
ATOM   2249  O   SER X 140     178.493 127.197 239.082  1.00  0.00           O
ATOM   2250  N   ILE X 141     178.493 125.326 237.962  1.00  0.00           N
ATOM   2251  H   ILE X 141     178.831 124.378 237.874  1.00  0.00           H
ATOM   2252  CA  ILE X 141     177.790 125.856 236.792  1.00  0.00           C
ATOM   2253  HA  ILE X 141     178.409 126.590 236.278  1.00  0.00           H
ATOM   2254  CB  ILE X 141     177.664 124.806 235.747  1.00  0.00           C
ATOM   2255  HB  ILE X 141     178.605 124.337 235.458  1.00  0.00           H
ATOM   2256  CG2 ILE X 141     176.748 123.652 236.213  1.00  0.00           C
ATOM   2257 HG21 ILE X 141     175.706 123.956 236.117  1.00  0.00           H
ATOM   2258 HG22 ILE X 141     177.054 123.297 237.197  1.00  0.00           H
ATOM   2259 HG23 ILE X 141     176.738 122.855 235.471  1.00  0.00           H
ATOM   2260  CG1 ILE X 141     177.091 125.423 234.439  1.00  0.00           C
ATOM   2261 HG12 ILE X 141     176.102 125.833 234.643  1.00  0.00           H
ATOM   2262 HG13 ILE X 141     177.786 126.201 234.124  1.00  0.00           H
ATOM   2263  CD1 ILE X 141     176.886 124.460 233.176  1.00  0.00           C
ATOM   2264 HD11 ILE X 141     176.612 125.145 232.373  1.00  0.00           H
ATOM   2265 HD12 ILE X 141     176.124 123.729 233.446  1.00  0.00           H
ATOM   2266 HD13 ILE X 141     177.834 123.997 232.904  1.00  0.00           H
ATOM   2267  C   ILE X 141     176.476 126.529 237.135  1.00  0.00           C
ATOM   2268  O   ILE X 141     176.092 127.531 236.583  1.00  0.00           O
ATOM   2269  N   GLU X 142     175.793 126.054 238.183  1.00  0.00           N
ATOM   2270  H   GLU X 142     176.269 125.290 238.640  1.00  0.00           H
ATOM   2271  CA  GLU X 142     174.405 126.475 238.634  1.00  0.00           C
ATOM   2272  HA  GLU X 142     173.791 126.694 237.761  1.00  0.00           H
ATOM   2273  CB  GLU X 142     173.778 125.184 239.263  1.00  0.00           C
ATOM   2274  HB2 GLU X 142     172.703 125.295 239.126  1.00  0.00           H
ATOM   2275  HB3 GLU X 142     173.980 124.353 238.588  1.00  0.00           H
ATOM   2276  CG  GLU X 142     174.114 124.794 240.666  1.00  0.00           C
ATOM   2277  HG2 GLU X 142     174.158 125.660 241.327  1.00  0.00           H
ATOM   2278  HG3 GLU X 142     173.307 124.216 241.115  1.00  0.00           H
ATOM   2279  CD  GLU X 142     175.420 123.926 240.895  1.00  0.00           C
ATOM   2280  OE1 GLU X 142     176.029 123.585 239.927  1.00  0.00           O
ATOM   2281  OE2 GLU X 142     175.859 123.697 242.043  1.00  0.00           O
ATOM   2282  C   GLU X 142     174.527 127.660 239.681  1.00  0.00           C
ATOM   2283  O   GLU X 142     173.550 128.411 239.863  1.00  0.00           O
ATOM   2284  N   ASP X 143     175.711 127.802 240.270  1.00  0.00           N
ATOM   2285  H   ASP X 143     176.440 127.125 240.096  1.00  0.00           H
ATOM   2286  CA  ASP X 143     176.000 129.148 240.848  1.00  0.00           C
ATOM   2287  HA  ASP X 143     175.175 129.530 241.449  1.00  0.00           H
ATOM   2288  CB  ASP X 143     177.214 129.011 241.758  1.00  0.00           C
ATOM   2289  HB2 ASP X 143     176.776 128.805 242.734  1.00  0.00           H
ATOM   2290  HB3 ASP X 143     177.854 128.176 241.475  1.00  0.00           H
ATOM   2291  CG  ASP X 143     178.099 130.211 242.036  1.00  0.00           C
ATOM   2292  OD1 ASP X 143     177.652 131.413 242.158  1.00  0.00           O
ATOM   2293  OD2 ASP X 143     179.363 129.944 242.108  1.00  0.00           O
ATOM   2294  C   ASP X 143     176.162 130.282 239.764  1.00  0.00           C
ATOM   2295  O   ASP X 143     175.635 131.350 239.913  1.00  0.00           O
ATOM   2296  N   ARG X 144     176.691 129.933 238.573  1.00  0.00           N
ATOM   2297  H   ARG X 144     176.942 128.955 238.549  1.00  0.00           H
ATOM   2298  CA  ARG X 144     176.991 130.894 237.477  1.00  0.00           C
ATOM   2299  HA  ARG X 144     177.405 131.776 237.966  1.00  0.00           H
ATOM   2300  CB  ARG X 144     178.030 130.412 236.450  1.00  0.00           C
ATOM   2301  HB2 ARG X 144     177.671 129.420 236.175  1.00  0.00           H
ATOM   2302  HB3 ARG X 144     178.111 131.113 235.619  1.00  0.00           H
ATOM   2303  CG  ARG X 144     179.401 130.148 237.124  1.00  0.00           C
ATOM   2304  HG2 ARG X 144     179.701 131.047 237.662  1.00  0.00           H
ATOM   2305  HG3 ARG X 144     179.311 129.298 237.801  1.00  0.00           H
ATOM   2306  CD  ARG X 144     180.460 129.824 236.051  1.00  0.00           C
ATOM   2307  HD2 ARG X 144     179.992 129.146 235.337  1.00  0.00           H
ATOM   2308  HD3 ARG X 144     180.813 130.774 235.648  1.00  0.00           H
ATOM   2309  NE  ARG X 144     181.716 129.307 236.612  1.00  0.00           N
ATOM   2310  HE  ARG X 144     181.638 128.522 237.242  1.00  0.00           H
ATOM   2311  CZ  ARG X 144     182.985 129.593 236.363  1.00  0.00           C
ATOM   2312  NH1 ARG X 144     183.554 130.392 235.481  1.00  0.00           N
ATOM   2313 HH11 ARG X 144     182.987 130.931 234.841  1.00  0.00           H
ATOM   2314 HH12 ARG X 144     184.563 130.347 235.460  1.00  0.00           H
ATOM   2315  NH2 ARG X 144     183.892 128.970 237.089  1.00  0.00           N
ATOM   2316 HH21 ARG X 144     183.527 128.232 237.674  1.00  0.00           H
ATOM   2317 HH22 ARG X 144     184.854 128.927 236.785  1.00  0.00           H
ATOM   2318  C   ARG X 144     175.744 131.411 236.724  1.00  0.00           C
ATOM   2319  O   ARG X 144     175.517 132.614 236.495  1.00  0.00           O
ATOM   2320  N   VAL X 145     174.819 130.542 236.616  1.00  0.00           N
ATOM   2321  H   VAL X 145     175.014 129.596 236.909  1.00  0.00           H
ATOM   2322  CA  VAL X 145     173.399 130.782 236.229  1.00  0.00           C
ATOM   2323  HA  VAL X 145     173.358 131.280 235.260  1.00  0.00           H
ATOM   2324  CB  VAL X 145     172.710 129.433 235.987  1.00  0.00           C
ATOM   2325  HB  VAL X 145     172.758 128.840 236.901  1.00  0.00           H
ATOM   2326  CG1 VAL X 145     171.270 129.617 235.523  1.00  0.00           C
ATOM   2327 HG11 VAL X 145     171.238 130.130 234.562  1.00  0.00           H
ATOM   2328 HG12 VAL X 145     170.799 128.635 235.471  1.00  0.00           H
ATOM   2329 HG13 VAL X 145     170.711 130.335 236.123  1.00  0.00           H
ATOM   2330  CG2 VAL X 145     173.412 128.632 234.880  1.00  0.00           C
ATOM   2331 HG21 VAL X 145     172.913 127.667 234.797  1.00  0.00           H
ATOM   2332 HG22 VAL X 145     174.494 128.508 234.919  1.00  0.00           H
ATOM   2333 HG23 VAL X 145     173.377 129.113 233.903  1.00  0.00           H
ATOM   2334  C   VAL X 145     172.557 131.575 237.196  1.00  0.00           C
ATOM   2335  O   VAL X 145     172.104 132.677 236.773  1.00  0.00           O
ATOM   2336  N   GLN X 146     172.661 131.187 238.446  1.00  0.00           N
ATOM   2337  H   GLN X 146     173.027 130.283 238.709  1.00  0.00           H
ATOM   2338  CA  GLN X 146     171.913 131.923 239.448  1.00  0.00           C
ATOM   2339  HA  GLN X 146     170.875 132.051 239.142  1.00  0.00           H
ATOM   2340  CB  GLN X 146     171.785 131.140 240.791  1.00  0.00           C
ATOM   2341  HB2 GLN X 146     171.541 130.108 240.535  1.00  0.00           H
ATOM   2342  HB3 GLN X 146     172.758 131.086 241.279  1.00  0.00           H
ATOM   2343  CG  GLN X 146     170.707 131.652 241.776  1.00  0.00           C
ATOM   2344  HG2 GLN X 146     169.859 132.174 241.333  1.00  0.00           H
ATOM   2345  HG3 GLN X 146     170.314 130.791 242.316  1.00  0.00           H
ATOM   2346  CD  GLN X 146     171.336 132.521 242.822  1.00  0.00           C
ATOM   2347  OE1 GLN X 146     172.290 133.249 242.614  1.00  0.00           O
ATOM   2348  NE2 GLN X 146     170.657 132.563 243.943  1.00  0.00           N
ATOM   2349 HE21 GLN X 146     170.955 133.092 244.750  1.00  0.00           H
ATOM   2350 HE22 GLN X 146     169.811 132.025 244.062  1.00  0.00           H
ATOM   2351  C   GLN X 146     172.426 133.352 239.641  1.00  0.00           C
ATOM   2352  O   GLN X 146     171.589 134.215 239.703  1.00  0.00           O
ATOM   2353  N   GLU X 147     173.724 133.620 239.558  1.00  0.00           N
ATOM   2354  H   GLU X 147     174.296 132.800 239.705  1.00  0.00           H
ATOM   2355  CA  GLU X 147     174.206 134.947 239.493  1.00  0.00           C
ATOM   2356  HA  GLU X 147     173.842 135.411 240.410  1.00  0.00           H
ATOM   2357  CB  GLU X 147     175.755 134.909 239.616  1.00  0.00           C
ATOM   2358  HB2 GLU X 147     176.037 134.425 240.550  1.00  0.00           H
ATOM   2359  HB3 GLU X 147     176.118 134.288 238.798  1.00  0.00           H
ATOM   2360  CG  GLU X 147     176.379 136.269 239.414  1.00  0.00           C
ATOM   2361  HG2 GLU X 147     175.950 136.618 238.474  1.00  0.00           H
ATOM   2362  HG3 GLU X 147     176.011 136.916 240.210  1.00  0.00           H
ATOM   2363  CD  GLU X 147     177.872 136.258 239.379  1.00  0.00           C
ATOM   2364  OE1 GLU X 147     178.544 135.281 238.991  1.00  0.00           O
ATOM   2365  OE2 GLU X 147     178.419 137.347 239.723  1.00  0.00           O
ATOM   2366  C   GLU X 147     173.591 135.764 238.347  1.00  0.00           C
ATOM   2367  O   GLU X 147     172.976 136.870 238.461  1.00  0.00           O
ATOM   2368  N   GLH X 148     173.721 135.286 237.127  1.00  0.00           N
ATOM   2369  H   GLH X 148     174.012 134.348 236.888  1.00  0.00           H
ATOM   2370  CA  GLH X 148     173.234 136.015 235.932  1.00  0.00           C
ATOM   2371  HA  GLH X 148     173.649 137.021 235.973  1.00  0.00           H
ATOM   2372  CB  GLH X 148     173.862 135.299 234.667  1.00  0.00           C
ATOM   2373  HB2 GLH X 148     174.940 135.285 234.825  1.00  0.00           H
ATOM   2374  HB3 GLH X 148     173.450 134.290 234.621  1.00  0.00           H
ATOM   2375  CG  GLH X 148     173.654 136.120 233.351  1.00  0.00           C
ATOM   2376  HG2 GLH X 148     174.047 135.540 232.516  1.00  0.00           H
ATOM   2377  HG3 GLH X 148     172.594 136.133 233.095  1.00  0.00           H
ATOM   2378  CD  GLH X 148     174.052 137.559 233.299  1.00  0.00           C
ATOM   2379  OE1 GLH X 148     173.417 138.379 232.683  1.00  0.00           O
ATOM   2380  OE2 GLH X 148     175.131 137.966 234.089  1.00  0.00           O
ATOM   2381  HE2 GLH X 148     175.316 138.899 233.953  1.00  0.00           H
ATOM   2382  C   GLH X 148     171.724 136.132 235.881  1.00  0.00           C
ATOM   2383  O   GLH X 148     171.189 137.100 235.373  1.00  0.00           O
ATOM   2384  N   ALA X 149     170.906 135.251 236.488  1.00  0.00           N
ATOM   2385  H   ALA X 149     171.323 134.465 236.968  1.00  0.00           H
ATOM   2386  CA  ALA X 149     169.446 135.340 236.637  1.00  0.00           C
ATOM   2387  HA  ALA X 149     169.066 135.419 235.619  1.00  0.00           H
ATOM   2388  CB  ALA X 149     168.991 134.024 237.287  1.00  0.00           C
ATOM   2389  HB1 ALA X 149     169.433 133.256 236.653  1.00  0.00           H
ATOM   2390  HB2 ALA X 149     167.907 133.994 237.177  1.00  0.00           H
ATOM   2391  HB3 ALA X 149     169.429 133.970 238.283  1.00  0.00           H
ATOM   2392  C   ALA X 149     169.066 136.593 237.479  1.00  0.00           C
ATOM   2393  O   ALA X 149     168.046 137.302 237.224  1.00  0.00           O
ATOM   2394  N   ARG X 150     169.764 136.897 238.623  1.00  0.00           N
ATOM   2395  H   ARG X 150     170.453 136.220 238.918  1.00  0.00           H
ATOM   2396  CA  ARG X 150     169.674 138.111 239.462  1.00  0.00           C
ATOM   2397  HA  ARG X 150     168.630 138.375 239.632  1.00  0.00           H
ATOM   2398  CB  ARG X 150     170.440 137.958 240.808  1.00  0.00           C
ATOM   2399  HB2 ARG X 150     171.448 137.650 240.529  1.00  0.00           H
ATOM   2400  HB3 ARG X 150     170.614 138.948 241.230  1.00  0.00           H
ATOM   2401  CG  ARG X 150     169.798 137.027 241.910  1.00  0.00           C
ATOM   2402  HG2 ARG X 150     168.850 137.500 242.168  1.00  0.00           H
ATOM   2403  HG3 ARG X 150     169.639 136.031 241.498  1.00  0.00           H
ATOM   2404  CD  ARG X 150     170.646 136.951 243.162  1.00  0.00           C
ATOM   2405  HD2 ARG X 150     170.962 137.979 243.340  1.00  0.00           H
ATOM   2406  HD3 ARG X 150     170.167 136.467 244.013  1.00  0.00           H
ATOM   2407  NE  ARG X 150     171.837 136.062 242.905  1.00  0.00           N
ATOM   2408  HE  ARG X 150     171.720 135.064 242.802  1.00  0.00           H
ATOM   2409  CZ  ARG X 150     173.102 136.362 242.869  1.00  0.00           C
ATOM   2410  NH1 ARG X 150     173.501 137.580 242.752  1.00  0.00           N
ATOM   2411 HH11 ARG X 150     172.875 138.370 242.691  1.00  0.00           H
ATOM   2412 HH12 ARG X 150     174.443 137.861 242.518  1.00  0.00           H
ATOM   2413  NH2 ARG X 150     173.962 135.407 242.919  1.00  0.00           N
ATOM   2414 HH21 ARG X 150     173.687 134.447 242.770  1.00  0.00           H
ATOM   2415 HH22 ARG X 150     174.927 135.692 243.013  1.00  0.00           H
ATOM   2416  C   ARG X 150     170.220 139.346 238.752  1.00  0.00           C
ATOM   2417  O   ARG X 150     169.647 140.410 238.898  1.00  0.00           O
ATOM   2418  N   CYS X 151     171.247 139.197 237.936  1.00  0.00           N
ATOM   2419  H   CYS X 151     171.705 138.299 237.990  1.00  0.00           H
ATOM   2420  CA  CYS X 151     171.689 140.277 236.985  1.00  0.00           C
ATOM   2421  HA  CYS X 151     171.665 141.203 237.559  1.00  0.00           H
ATOM   2422  CB  CYS X 151     172.975 139.998 236.203  1.00  0.00           C
ATOM   2423  HB2 CYS X 151     172.841 139.311 235.368  1.00  0.00           H
ATOM   2424  HB3 CYS X 151     173.393 140.907 235.770  1.00  0.00           H
ATOM   2425  SG  CYS X 151     174.326 139.419 237.306  1.00  0.00           S
ATOM   2426  HG  CYS X 151     173.857 138.325 237.912  1.00  0.00           H
ATOM   2427  C   CYS X 151     170.589 140.669 235.866  1.00  0.00           C
ATOM   2428  O   CYS X 151     170.644 141.780 235.406  1.00  0.00           O
ATOM   2429  N   LEU X 152     169.694 139.763 235.466  1.00  0.00           N
ATOM   2430  H   LEU X 152     170.040 138.815 235.508  1.00  0.00           H
ATOM   2431  CA  LEU X 152     168.475 139.922 234.681  1.00  0.00           C
ATOM   2432  HA  LEU X 152     168.911 140.504 233.870  1.00  0.00           H
ATOM   2433  CB  LEU X 152     167.986 138.655 234.084  1.00  0.00           C
ATOM   2434  HB2 LEU X 152     168.789 138.204 233.502  1.00  0.00           H
ATOM   2435  HB3 LEU X 152     167.756 137.910 234.846  1.00  0.00           H
ATOM   2436  CG  LEU X 152     166.717 138.767 233.146  1.00  0.00           C
ATOM   2437  HG  LEU X 152     165.859 139.050 233.755  1.00  0.00           H
ATOM   2438  CD1 LEU X 152     166.907 139.805 231.995  1.00  0.00           C
ATOM   2439 HD11 LEU X 152     166.919 140.842 232.328  1.00  0.00           H
ATOM   2440 HD12 LEU X 152     166.104 139.794 231.258  1.00  0.00           H
ATOM   2441 HD13 LEU X 152     167.823 139.605 231.439  1.00  0.00           H
ATOM   2442  CD2 LEU X 152     166.456 137.414 232.515  1.00  0.00           C
ATOM   2443 HD21 LEU X 152     165.974 136.768 233.249  1.00  0.00           H
ATOM   2444 HD22 LEU X 152     165.903 137.506 231.580  1.00  0.00           H
ATOM   2445 HD23 LEU X 152     167.415 136.944 232.295  1.00  0.00           H
ATOM   2446  C   LEU X 152     167.394 140.680 235.434  1.00  0.00           C
ATOM   2447  O   LEU X 152     166.825 141.625 234.902  1.00  0.00           O
ATOM   2448  N   VAL X 153     167.149 140.332 236.694  1.00  0.00           N
ATOM   2449  H   VAL X 153     167.719 139.741 237.283  1.00  0.00           H
ATOM   2450  CA  VAL X 153     165.984 140.943 237.500  1.00  0.00           C
ATOM   2451  HA  VAL X 153     164.986 140.890 237.064  1.00  0.00           H
ATOM   2452  CB  VAL X 153     165.897 140.160 238.844  1.00  0.00           C
ATOM   2453  HB  VAL X 153     166.868 139.974 239.303  1.00  0.00           H
ATOM   2454  CG1 VAL X 153     164.977 140.868 239.822  1.00  0.00           C
ATOM   2455 HG11 VAL X 153     165.347 141.856 240.097  1.00  0.00           H
ATOM   2456 HG12 VAL X 153     164.079 140.981 239.214  1.00  0.00           H
ATOM   2457 HG13 VAL X 153     164.740 140.326 240.737  1.00  0.00           H
ATOM   2458  CG2 VAL X 153     165.147 138.765 238.562  1.00  0.00           C
ATOM   2459 HG21 VAL X 153     165.969 138.081 238.350  1.00  0.00           H
ATOM   2460 HG22 VAL X 153     164.358 138.808 237.811  1.00  0.00           H
ATOM   2461 HG23 VAL X 153     164.733 138.424 239.510  1.00  0.00           H
ATOM   2462  C   VAL X 153     166.323 142.445 237.758  1.00  0.00           C
ATOM   2463  O   VAL X 153     165.411 143.327 237.604  1.00  0.00           O
ATOM   2464  N   GLU X 154     167.596 142.694 238.195  1.00  0.00           N
ATOM   2465  H   GLU X 154     168.190 141.960 238.554  1.00  0.00           H
ATOM   2466  CA  GLU X 154     168.176 144.063 238.471  1.00  0.00           C
ATOM   2467  HA  GLU X 154     167.497 144.474 239.219  1.00  0.00           H
ATOM   2468  CB  GLU X 154     169.529 143.933 239.303  1.00  0.00           C
ATOM   2469  HB2 GLU X 154     169.113 143.385 240.149  1.00  0.00           H
ATOM   2470  HB3 GLU X 154     170.328 143.350 238.845  1.00  0.00           H
ATOM   2471  CG  GLU X 154     170.083 145.243 239.755  1.00  0.00           C
ATOM   2472  HG2 GLU X 154     171.117 145.102 240.070  1.00  0.00           H
ATOM   2473  HG3 GLU X 154     170.256 145.962 238.954  1.00  0.00           H
ATOM   2474  CD  GLU X 154     169.222 145.931 240.772  1.00  0.00           C
ATOM   2475  OE1 GLU X 154     168.535 145.280 241.569  1.00  0.00           O
ATOM   2476  OE2 GLU X 154     169.230 147.205 240.839  1.00  0.00           O
ATOM   2477  C   GLU X 154     168.231 145.067 237.294  1.00  0.00           C
ATOM   2478  O   GLU X 154     167.962 146.263 237.554  1.00  0.00           O
ATOM   2479  N   GLU X 155     168.539 144.542 236.086  1.00  0.00           N
ATOM   2480  H   GLU X 155     168.677 143.542 236.060  1.00  0.00           H
ATOM   2481  CA  GLU X 155     168.348 145.193 234.797  1.00  0.00           C
ATOM   2482  HA  GLU X 155     168.841 146.165 234.804  1.00  0.00           H
ATOM   2483  CB  GLU X 155     168.737 144.316 233.545  1.00  0.00           C
ATOM   2484  HB2 GLU X 155     169.812 144.203 233.683  1.00  0.00           H
ATOM   2485  HB3 GLU X 155     168.133 143.410 233.493  1.00  0.00           H
ATOM   2486  CG  GLU X 155     168.519 145.055 232.239  1.00  0.00           C
ATOM   2487  HG2 GLU X 155     168.917 144.484 231.400  1.00  0.00           H
ATOM   2488  HG3 GLU X 155     167.459 145.170 232.016  1.00  0.00           H
ATOM   2489  CD  GLU X 155     169.159 146.429 232.205  1.00  0.00           C
ATOM   2490  OE1 GLU X 155     170.346 146.595 232.576  1.00  0.00           O
ATOM   2491  OE2 GLU X 155     168.595 147.407 231.750  1.00  0.00           O
ATOM   2492  C   GLU X 155     166.816 145.624 234.758  1.00  0.00           C
ATOM   2493  O   GLU X 155     166.534 146.831 234.791  1.00  0.00           O
ATOM   2494  N   LEU X 156     165.889 144.695 234.839  1.00  0.00           N
ATOM   2495  H   LEU X 156     166.181 143.754 235.061  1.00  0.00           H
ATOM   2496  CA  LEU X 156     164.487 144.999 234.477  1.00  0.00           C
ATOM   2497  HA  LEU X 156     164.465 145.562 233.544  1.00  0.00           H
ATOM   2498  CB  LEU X 156     163.598 143.715 234.292  1.00  0.00           C
ATOM   2499  HB2 LEU X 156     163.455 143.208 235.246  1.00  0.00           H
ATOM   2500  HB3 LEU X 156     162.604 144.042 233.987  1.00  0.00           H
ATOM   2501  CG  LEU X 156     164.066 142.804 233.185  1.00  0.00           C
ATOM   2502  HG  LEU X 156     165.102 142.520 233.368  1.00  0.00           H
ATOM   2503  CD1 LEU X 156     163.172 141.592 233.166  1.00  0.00           C
ATOM   2504 HD11 LEU X 156     163.640 140.753 232.650  1.00  0.00           H
ATOM   2505 HD12 LEU X 156     162.269 141.758 232.578  1.00  0.00           H
ATOM   2506 HD13 LEU X 156     162.956 141.205 234.162  1.00  0.00           H
ATOM   2507  CD2 LEU X 156     163.952 143.642 231.825  1.00  0.00           C
ATOM   2508 HD21 LEU X 156     164.704 144.430 231.779  1.00  0.00           H
ATOM   2509 HD22 LEU X 156     163.967 143.074 230.894  1.00  0.00           H
ATOM   2510 HD23 LEU X 156     162.964 144.077 231.676  1.00  0.00           H
ATOM   2511  C   LEU X 156     163.709 145.854 235.490  1.00  0.00           C
ATOM   2512  O   LEU X 156     162.975 146.753 235.067  1.00  0.00           O
ATOM   2513  N   ARG X 157     163.999 145.695 236.789  1.00  0.00           N
ATOM   2514  H   ARG X 157     164.450 144.856 237.124  1.00  0.00           H
ATOM   2515  CA  ARG X 157     163.506 146.535 237.869  1.00  0.00           C
ATOM   2516  HA  ARG X 157     162.440 146.354 238.004  1.00  0.00           H
ATOM   2517  CB  ARG X 157     164.129 146.057 239.142  1.00  0.00           C
ATOM   2518  HB2 ARG X 157     164.117 144.971 239.057  1.00  0.00           H
ATOM   2519  HB3 ARG X 157     165.156 146.361 239.343  1.00  0.00           H
ATOM   2520  CG  ARG X 157     163.289 146.337 240.453  1.00  0.00           C
ATOM   2521  HG2 ARG X 157     163.250 147.404 240.674  1.00  0.00           H
ATOM   2522  HG3 ARG X 157     162.287 145.948 240.270  1.00  0.00           H
ATOM   2523  CD  ARG X 157     163.773 145.629 241.734  1.00  0.00           C
ATOM   2524  HD2 ARG X 157     163.106 145.942 242.537  1.00  0.00           H
ATOM   2525  HD3 ARG X 157     163.500 144.581 241.603  1.00  0.00           H
ATOM   2526  NE  ARG X 157     165.167 145.929 242.027  1.00  0.00           N
ATOM   2527  HE  ARG X 157     165.733 145.092 242.053  1.00  0.00           H
ATOM   2528  CZ  ARG X 157     165.623 146.920 242.712  1.00  0.00           C
ATOM   2529  NH1 ARG X 157     164.835 147.711 243.303  1.00  0.00           N
ATOM   2530 HH11 ARG X 157     163.828 147.786 243.287  1.00  0.00           H
ATOM   2531 HH12 ARG X 157     165.335 148.491 243.705  1.00  0.00           H
ATOM   2532  NH2 ARG X 157     166.881 147.065 242.931  1.00  0.00           N
ATOM   2533 HH21 ARG X 157     167.471 146.389 242.468  1.00  0.00           H
ATOM   2534 HH22 ARG X 157     167.183 147.454 243.812  1.00  0.00           H
ATOM   2535  C   ARG X 157     163.672 148.095 237.609  1.00  0.00           C
ATOM   2536  O   ARG X 157     162.910 148.862 238.196  1.00  0.00           O
ATOM   2537  N   LYS X 158     164.470 148.504 236.662  1.00  0.00           N
ATOM   2538  H   LYS X 158     165.194 147.885 236.326  1.00  0.00           H
ATOM   2539  CA  LYS X 158     164.612 149.903 236.238  1.00  0.00           C
ATOM   2540  HA  LYS X 158     164.669 150.412 237.201  1.00  0.00           H
ATOM   2541  CB  LYS X 158     165.899 150.142 235.432  1.00  0.00           C
ATOM   2542  HB2 LYS X 158     165.914 149.468 234.575  1.00  0.00           H
ATOM   2543  HB3 LYS X 158     166.004 151.137 234.999  1.00  0.00           H
ATOM   2544  CG  LYS X 158     167.137 149.796 236.276  1.00  0.00           C
ATOM   2545  HG2 LYS X 158     166.958 148.802 236.686  1.00  0.00           H
ATOM   2546  HG3 LYS X 158     167.959 149.861 235.563  1.00  0.00           H
ATOM   2547  CD  LYS X 158     167.462 150.657 237.469  1.00  0.00           C
ATOM   2548  HD2 LYS X 158     167.545 151.645 237.016  1.00  0.00           H
ATOM   2549  HD3 LYS X 158     166.633 150.649 238.176  1.00  0.00           H
ATOM   2550  CE  LYS X 158     168.760 150.253 238.066  1.00  0.00           C
ATOM   2551  HE2 LYS X 158     168.677 149.206 238.358  1.00  0.00           H
ATOM   2552  HE3 LYS X 158     169.601 150.328 237.377  1.00  0.00           H
ATOM   2553  NZ  LYS X 158     169.053 151.044 239.293  1.00  0.00           N
ATOM   2554  HZ1 LYS X 158     168.911 152.036 239.163  1.00  0.00           H
ATOM   2555  HZ2 LYS X 158     170.033 150.896 239.487  1.00  0.00           H
ATOM   2556  HZ3 LYS X 158     168.410 150.786 240.027  1.00  0.00           H
ATOM   2557  C   LYS X 158     163.433 150.392 235.384  1.00  0.00           C
ATOM   2558  O   LYS X 158     163.044 151.560 235.446  1.00  0.00           O
ATOM   2559  N   THR X 159     162.879 149.529 234.531  1.00  0.00           N
ATOM   2560  H   THR X 159     163.216 148.580 234.451  1.00  0.00           H
ATOM   2561  CA  THR X 159     161.747 149.960 233.639  1.00  0.00           C
ATOM   2562  HA  THR X 159     161.986 150.746 232.923  1.00  0.00           H
ATOM   2563  CB  THR X 159     161.078 148.827 232.846  1.00  0.00           C
ATOM   2564  HB  THR X 159     160.301 149.200 232.179  1.00  0.00           H
ATOM   2565  CG2 THR X 159     162.035 148.147 231.908  1.00  0.00           C
ATOM   2566 HG21 THR X 159     161.636 147.198 231.548  1.00  0.00           H
ATOM   2567 HG22 THR X 159     162.921 147.760 232.411  1.00  0.00           H
ATOM   2568 HG23 THR X 159     162.400 148.840 231.150  1.00  0.00           H
ATOM   2569  OG1 THR X 159     160.471 147.785 233.607  1.00  0.00           O
ATOM   2570  HG1 THR X 159     161.254 147.461 234.059  1.00  0.00           H
ATOM   2571  C   THR X 159     160.446 150.456 234.369  1.00  0.00           C
ATOM   2572  O   THR X 159     159.630 151.144 233.673  1.00  0.00           O
ATOM   2573  N   LYS X 160     160.207 150.106 235.640  1.00  0.00           N
ATOM   2574  H   LYS X 160     160.716 149.286 235.935  1.00  0.00           H
ATOM   2575  CA  LYS X 160     159.121 150.735 236.440  1.00  0.00           C
ATOM   2576  HA  LYS X 160     159.006 150.073 237.298  1.00  0.00           H
ATOM   2577  CB  LYS X 160     159.431 152.113 236.962  1.00  0.00           C
ATOM   2578  HB2 LYS X 160     159.530 152.954 236.277  1.00  0.00           H
ATOM   2579  HB3 LYS X 160     158.562 152.422 237.542  1.00  0.00           H
ATOM   2580  CG  LYS X 160     160.529 152.057 238.003  1.00  0.00           C
ATOM   2581  HG2 LYS X 160     160.115 151.593 238.897  1.00  0.00           H
ATOM   2582  HG3 LYS X 160     161.431 151.495 237.760  1.00  0.00           H
ATOM   2583  CD  LYS X 160     160.938 153.532 238.357  1.00  0.00           C
ATOM   2584  HD2 LYS X 160     161.559 153.860 237.523  1.00  0.00           H
ATOM   2585  HD3 LYS X 160     160.089 154.183 238.567  1.00  0.00           H
ATOM   2586  CE  LYS X 160     161.901 153.765 239.528  1.00  0.00           C
ATOM   2587  HE2 LYS X 160     161.242 153.986 240.367  1.00  0.00           H
ATOM   2588  HE3 LYS X 160     162.550 152.908 239.709  1.00  0.00           H
ATOM   2589  NZ  LYS X 160     162.743 155.026 239.311  1.00  0.00           N
ATOM   2590  HZ1 LYS X 160     163.551 154.862 238.727  1.00  0.00           H
ATOM   2591  HZ2 LYS X 160     162.951 155.399 240.226  1.00  0.00           H
ATOM   2592  HZ3 LYS X 160     162.288 155.808 238.863  1.00  0.00           H
ATOM   2593  C   LYS X 160     157.745 150.504 235.790  1.00  0.00           C
ATOM   2594  O   LYS X 160     157.023 151.497 235.552  1.00  0.00           O
ATOM   2595  N   ALA X 161     157.342 149.273 235.395  1.00  0.00           N
ATOM   2596  H   ALA X 161     157.917 148.512 235.727  1.00  0.00           H
ATOM   2597  CA  ALA X 161     156.201 148.909 234.592  1.00  0.00           C
ATOM   2598  HA  ALA X 161     156.391 147.845 234.450  1.00  0.00           H
ATOM   2599  CB  ALA X 161     154.931 148.927 235.465  1.00  0.00           C
ATOM   2600  HB1 ALA X 161     155.124 148.595 236.486  1.00  0.00           H
ATOM   2601  HB2 ALA X 161     154.089 148.384 235.035  1.00  0.00           H
ATOM   2602  HB3 ALA X 161     154.500 149.925 235.399  1.00  0.00           H
ATOM   2603  C   ALA X 161     156.036 149.600 233.178  1.00  0.00           C
ATOM   2604  O   ALA X 161     155.092 149.352 232.467  1.00  0.00           O
ATOM   2605  N   SER X 162     156.902 150.550 232.681  1.00  0.00           N
ATOM   2606  H   SER X 162     157.677 150.807 233.276  1.00  0.00           H
ATOM   2607  CA  SER X 162     156.813 151.265 231.338  1.00  0.00           C
ATOM   2608  HA  SER X 162     155.839 151.751 231.285  1.00  0.00           H
ATOM   2609  CB  SER X 162     157.903 152.253 231.139  1.00  0.00           C
ATOM   2610  HB2 SER X 162     157.673 153.121 231.756  1.00  0.00           H
ATOM   2611  HB3 SER X 162     158.824 151.917 231.616  1.00  0.00           H
ATOM   2612  OG  SER X 162     158.075 152.877 229.910  1.00  0.00           O
ATOM   2613  HG  SER X 162     157.334 153.447 229.696  1.00  0.00           H
ATOM   2614  C   SER X 162     156.917 150.225 230.186  1.00  0.00           C
ATOM   2615  O   SER X 162     157.773 149.413 230.319  1.00  0.00           O
ATOM   2616  N   PRO X 163     156.230 150.161 229.066  1.00  0.00           N
ATOM   2617  CD  PRO X 163     155.144 151.085 228.810  1.00  0.00           C
ATOM   2618  HD2 PRO X 163     155.573 152.021 228.451  1.00  0.00           H
ATOM   2619  HD3 PRO X 163     154.505 151.209 229.684  1.00  0.00           H
ATOM   2620  CG  PRO X 163     154.286 150.366 227.732  1.00  0.00           C
ATOM   2621  HG2 PRO X 163     153.955 151.128 227.025  1.00  0.00           H
ATOM   2622  HG3 PRO X 163     153.487 149.799 228.209  1.00  0.00           H
ATOM   2623  CB  PRO X 163     155.250 149.450 227.044  1.00  0.00           C
ATOM   2624  HB2 PRO X 163     155.753 150.006 226.253  1.00  0.00           H
ATOM   2625  HB3 PRO X 163     154.682 148.558 226.781  1.00  0.00           H
ATOM   2626  CA  PRO X 163     156.352 149.073 228.085  1.00  0.00           C
ATOM   2627  HA  PRO X 163     156.231 148.093 228.547  1.00  0.00           H
ATOM   2628  C   PRO X 163     157.760 149.082 227.424  1.00  0.00           C
ATOM   2629  O   PRO X 163     158.308 150.082 226.982  1.00  0.00           O
ATOM   2630  N   CYS X 164     158.385 147.884 227.432  1.00  0.00           N
ATOM   2631  H   CYS X 164     157.921 147.015 227.654  1.00  0.00           H
ATOM   2632  CA  CYS X 164     159.669 147.651 226.770  1.00  0.00           C
ATOM   2633  HA  CYS X 164     159.876 148.525 226.152  1.00  0.00           H
ATOM   2634  CB  CYS X 164     160.767 147.522 227.865  1.00  0.00           C
ATOM   2635  HB2 CYS X 164     161.733 147.464 227.363  1.00  0.00           H
ATOM   2636  HB3 CYS X 164     160.688 148.419 228.480  1.00  0.00           H
ATOM   2637  SG  CYS X 164     160.561 146.009 228.748  1.00  0.00           S
ATOM   2638  HG  CYS X 164     159.370 146.307 229.274  1.00  0.00           H
ATOM   2639  C   CYS X 164     159.598 146.519 225.721  1.00  0.00           C
ATOM   2640  O   CYS X 164     158.565 145.917 225.544  1.00  0.00           O
ATOM   2641  N   ASP X 165     160.719 146.181 225.082  1.00  0.00           N
ATOM   2642  H   ASP X 165     161.444 146.878 224.998  1.00  0.00           H
ATOM   2643  CA  ASP X 165     160.901 144.884 224.360  1.00  0.00           C
ATOM   2644  HA  ASP X 165     160.026 144.246 224.477  1.00  0.00           H
ATOM   2645  CB  ASP X 165     160.971 145.145 222.917  1.00  0.00           C
ATOM   2646  HB2 ASP X 165     160.010 145.582 222.646  1.00  0.00           H
ATOM   2647  HB3 ASP X 165     161.752 145.882 222.734  1.00  0.00           H
ATOM   2648  CG  ASP X 165     161.387 143.957 222.085  1.00  0.00           C
ATOM   2649  OD1 ASP X 165     161.193 142.768 222.485  1.00  0.00           O
ATOM   2650  OD2 ASP X 165     162.036 144.196 221.037  1.00  0.00           O
ATOM   2651  C   ASP X 165     162.148 144.116 224.941  1.00  0.00           C
ATOM   2652  O   ASP X 165     163.353 144.428 224.652  1.00  0.00           O
ATOM   2653  N   PRO X 166     161.902 142.953 225.624  1.00  0.00           N
ATOM   2654  CD  PRO X 166     160.612 142.629 226.354  1.00  0.00           C
ATOM   2655  HD2 PRO X 166     160.082 141.928 225.709  1.00  0.00           H
ATOM   2656  HD3 PRO X 166     160.031 143.520 226.587  1.00  0.00           H
ATOM   2657  CG  PRO X 166     161.074 142.039 227.626  1.00  0.00           C
ATOM   2658  HG2 PRO X 166     160.321 141.351 228.011  1.00  0.00           H
ATOM   2659  HG3 PRO X 166     161.174 142.793 228.406  1.00  0.00           H
ATOM   2660  CB  PRO X 166     162.385 141.316 227.220  1.00  0.00           C
ATOM   2661  HB2 PRO X 166     162.199 140.354 226.742  1.00  0.00           H
ATOM   2662  HB3 PRO X 166     163.093 141.390 228.045  1.00  0.00           H
ATOM   2663  CA  PRO X 166     163.019 142.239 226.155  1.00  0.00           C
ATOM   2664  HA  PRO X 166     163.683 142.985 226.591  1.00  0.00           H
ATOM   2665  C   PRO X 166     163.713 141.385 225.183  1.00  0.00           C
ATOM   2666  O   PRO X 166     164.616 140.644 225.603  1.00  0.00           O
ATOM   2667  N   THR X 167     163.446 141.478 223.860  1.00  0.00           N
ATOM   2668  H   THR X 167     162.687 142.054 223.525  1.00  0.00           H
ATOM   2669  CA  THR X 167     164.103 140.576 222.814  1.00  0.00           C
ATOM   2670  HA  THR X 167     163.736 139.557 222.932  1.00  0.00           H
ATOM   2671  CB  THR X 167     163.711 141.077 221.376  1.00  0.00           C
ATOM   2672  HB  THR X 167     163.982 142.128 221.273  1.00  0.00           H
ATOM   2673  CG2 THR X 167     164.544 140.443 220.330  1.00  0.00           C
ATOM   2674 HG21 THR X 167     164.732 139.404 220.600  1.00  0.00           H
ATOM   2675 HG22 THR X 167     165.503 140.961 220.308  1.00  0.00           H
ATOM   2676 HG23 THR X 167     164.191 140.515 219.301  1.00  0.00           H
ATOM   2677  OG1 THR X 167     162.353 140.779 221.201  1.00  0.00           O
ATOM   2678  HG1 THR X 167     161.769 141.361 221.692  1.00  0.00           H
ATOM   2679  C   THR X 167     165.581 140.592 222.987  1.00  0.00           C
ATOM   2680  O   THR X 167     166.233 139.550 223.009  1.00  0.00           O
ATOM   2681  N   PHE X 168     166.217 141.762 223.007  1.00  0.00           N
ATOM   2682  H   PHE X 168     165.703 142.617 222.849  1.00  0.00           H
ATOM   2683  CA  PHE X 168     167.652 141.890 223.146  1.00  0.00           C
ATOM   2684  HA  PHE X 168     168.178 141.252 222.435  1.00  0.00           H
ATOM   2685  CB  PHE X 168     167.993 143.384 222.822  1.00  0.00           C
ATOM   2686  HB2 PHE X 168     167.546 143.833 221.935  1.00  0.00           H
ATOM   2687  HB3 PHE X 168     167.407 143.964 223.536  1.00  0.00           H
ATOM   2688  CG  PHE X 168     169.421 143.855 222.651  1.00  0.00           C
ATOM   2689  CD1 PHE X 168     169.678 145.212 223.032  1.00  0.00           C
ATOM   2690  HD1 PHE X 168     168.905 145.832 223.461  1.00  0.00           H
ATOM   2691  CE1 PHE X 168     171.009 145.612 222.852  1.00  0.00           C
ATOM   2692  HE1 PHE X 168     171.292 146.583 223.229  1.00  0.00           H
ATOM   2693  CZ  PHE X 168     171.984 144.795 222.244  1.00  0.00           C
ATOM   2694  HZ  PHE X 168     172.893 145.254 221.886  1.00  0.00           H
ATOM   2695  CE2 PHE X 168     171.707 143.518 221.874  1.00  0.00           C
ATOM   2696  HE2 PHE X 168     172.497 142.976 221.375  1.00  0.00           H
ATOM   2697  CD2 PHE X 168     170.427 143.056 222.127  1.00  0.00           C
ATOM   2698  HD2 PHE X 168     170.287 142.025 221.837  1.00  0.00           H
ATOM   2699  C   PHE X 168     168.303 141.609 224.533  1.00  0.00           C
ATOM   2700  O   PHE X 168     169.287 140.879 224.557  1.00  0.00           O
ATOM   2701  N   ILE X 169     167.659 141.956 225.599  1.00  0.00           N
ATOM   2702  H   ILE X 169     166.820 142.488 225.415  1.00  0.00           H
ATOM   2703  CA  ILE X 169     167.962 141.628 227.020  1.00  0.00           C
ATOM   2704  HA  ILE X 169     168.952 142.044 227.202  1.00  0.00           H
ATOM   2705  CB  ILE X 169     167.033 142.394 227.943  1.00  0.00           C
ATOM   2706  HB  ILE X 169     166.024 142.482 227.540  1.00  0.00           H
ATOM   2707  CG2 ILE X 169     166.892 141.758 229.337  1.00  0.00           C
ATOM   2708 HG21 ILE X 169     166.470 142.446 230.071  1.00  0.00           H
ATOM   2709 HG22 ILE X 169     167.853 141.566 229.814  1.00  0.00           H
ATOM   2710 HG23 ILE X 169     166.290 140.854 229.246  1.00  0.00           H
ATOM   2711  CG1 ILE X 169     167.411 143.898 227.997  1.00  0.00           C
ATOM   2712 HG12 ILE X 169     168.227 144.086 228.694  1.00  0.00           H
ATOM   2713 HG13 ILE X 169     167.628 144.261 226.992  1.00  0.00           H
ATOM   2714  CD1 ILE X 169     166.246 144.740 228.576  1.00  0.00           C
ATOM   2715 HD11 ILE X 169     166.490 145.795 228.454  1.00  0.00           H
ATOM   2716 HD12 ILE X 169     166.086 144.622 229.647  1.00  0.00           H
ATOM   2717 HD13 ILE X 169     165.278 144.637 228.086  1.00  0.00           H
ATOM   2718  C   ILE X 169     167.997 140.119 227.274  1.00  0.00           C
ATOM   2719  O   ILE X 169     168.966 139.596 227.824  1.00  0.00           O
ATOM   2720  N   LEU X 170     166.994 139.445 226.809  1.00  0.00           N
ATOM   2721  H   LEU X 170     166.280 139.868 226.232  1.00  0.00           H
ATOM   2722  CA  LEU X 170     166.777 137.980 226.980  1.00  0.00           C
ATOM   2723  HA  LEU X 170     167.121 137.752 227.989  1.00  0.00           H
ATOM   2724  CB  LEU X 170     165.346 137.597 226.682  1.00  0.00           C
ATOM   2725  HB2 LEU X 170     165.085 137.895 225.667  1.00  0.00           H
ATOM   2726  HB3 LEU X 170     165.325 136.509 226.624  1.00  0.00           H
ATOM   2727  CG  LEU X 170     164.324 138.075 227.701  1.00  0.00           C
ATOM   2728  HG  LEU X 170     164.348 139.163 227.638  1.00  0.00           H
ATOM   2729  CD1 LEU X 170     162.930 137.554 227.339  1.00  0.00           C
ATOM   2730 HD11 LEU X 170     162.853 136.477 227.491  1.00  0.00           H
ATOM   2731 HD12 LEU X 170     162.764 137.670 226.268  1.00  0.00           H
ATOM   2732 HD13 LEU X 170     162.246 138.150 227.943  1.00  0.00           H
ATOM   2733  CD2 LEU X 170     164.585 137.566 229.131  1.00  0.00           C
ATOM   2734 HD21 LEU X 170     164.573 136.477 229.163  1.00  0.00           H
ATOM   2735 HD22 LEU X 170     165.550 137.968 229.440  1.00  0.00           H
ATOM   2736 HD23 LEU X 170     163.845 137.949 229.835  1.00  0.00           H
ATOM   2737  C   LEU X 170     167.740 137.191 226.033  1.00  0.00           C
ATOM   2738  O   LEU X 170     167.837 135.970 226.103  1.00  0.00           O
ATOM   2739  N   GLY X 171     168.569 137.925 225.193  1.00  0.00           N
ATOM   2740  H   GLY X 171     168.232 138.842 224.935  1.00  0.00           H
ATOM   2741  CA  GLY X 171     169.861 137.520 224.618  1.00  0.00           C
ATOM   2742  HA2 GLY X 171     169.887 136.432 224.551  1.00  0.00           H
ATOM   2743  HA3 GLY X 171     170.000 137.753 223.562  1.00  0.00           H
ATOM   2744  C   GLY X 171     171.090 137.879 225.386  1.00  0.00           C
ATOM   2745  O   GLY X 171     172.011 137.073 225.510  1.00  0.00           O
ATOM   2746  N   CYS X 172     171.109 139.092 226.048  1.00  0.00           N
ATOM   2747  H   CYS X 172     170.258 139.634 226.012  1.00  0.00           H
ATOM   2748  CA  CYS X 172     172.137 139.559 226.940  1.00  0.00           C
ATOM   2749  HA  CYS X 172     173.112 139.594 226.456  1.00  0.00           H
ATOM   2750  CB  CYS X 172     171.796 140.986 227.313  1.00  0.00           C
ATOM   2751  HB2 CYS X 172     170.931 140.994 227.977  1.00  0.00           H
ATOM   2752  HB3 CYS X 172     172.583 141.318 227.991  1.00  0.00           H
ATOM   2753  SG  CYS X 172     171.790 142.247 226.020  1.00  0.00           S
ATOM   2754  HG  CYS X 172     171.054 141.622 225.096  1.00  0.00           H
ATOM   2755  C   CYS X 172     172.411 138.702 228.184  1.00  0.00           C
ATOM   2756  O   CYS X 172     173.573 138.452 228.555  1.00  0.00           O
ATOM   2757  N   ALA X 173     171.319 138.164 228.725  1.00  0.00           N
ATOM   2758  H   ALA X 173     170.438 138.607 228.506  1.00  0.00           H
ATOM   2759  CA  ALA X 173     171.382 137.319 229.895  1.00  0.00           C
ATOM   2760  HA  ALA X 173     172.028 137.805 230.625  1.00  0.00           H
ATOM   2761  CB  ALA X 173     170.048 137.426 230.618  1.00  0.00           C
ATOM   2762  HB1 ALA X 173     169.831 138.402 231.051  1.00  0.00           H
ATOM   2763  HB2 ALA X 173     169.944 136.553 231.263  1.00  0.00           H
ATOM   2764  HB3 ALA X 173     169.306 137.284 229.832  1.00  0.00           H
ATOM   2765  C   ALA X 173     171.968 135.993 229.491  1.00  0.00           C
ATOM   2766  O   ALA X 173     172.912 135.614 230.186  1.00  0.00           O
ATOM   2767  N   PRO X 174     171.427 135.138 228.579  1.00  0.00           N
ATOM   2768  CD  PRO X 174     170.175 135.172 227.812  1.00  0.00           C
ATOM   2769  HD2 PRO X 174     170.330 135.614 226.828  1.00  0.00           H
ATOM   2770  HD3 PRO X 174     169.313 135.584 228.336  1.00  0.00           H
ATOM   2771  CG  PRO X 174     169.911 133.671 227.489  1.00  0.00           C
ATOM   2772  HG2 PRO X 174     169.247 133.546 226.633  1.00  0.00           H
ATOM   2773  HG3 PRO X 174     169.403 133.097 228.263  1.00  0.00           H
ATOM   2774  CB  PRO X 174     171.259 133.082 227.216  1.00  0.00           C
ATOM   2775  HB2 PRO X 174     171.595 133.346 226.213  1.00  0.00           H
ATOM   2776  HB3 PRO X 174     171.216 132.021 227.464  1.00  0.00           H
ATOM   2777  CA  PRO X 174     172.096 133.877 228.213  1.00  0.00           C
ATOM   2778  HA  PRO X 174     172.331 133.274 229.090  1.00  0.00           H
ATOM   2779  C   PRO X 174     173.499 134.203 227.578  1.00  0.00           C
ATOM   2780  O   PRO X 174     174.385 133.440 228.017  1.00  0.00           O
ATOM   2781  N   CYS X 175     173.744 135.289 226.834  1.00  0.00           N
ATOM   2782  H   CYS X 175     172.983 135.910 226.598  1.00  0.00           H
ATOM   2783  CA  CYS X 175     175.061 135.560 226.269  1.00  0.00           C
ATOM   2784  HA  CYS X 175     175.372 134.790 225.563  1.00  0.00           H
ATOM   2785  CB  CYS X 175     175.141 136.867 225.496  1.00  0.00           C
ATOM   2786  HB2 CYS X 175     174.442 136.853 224.660  1.00  0.00           H
ATOM   2787  HB3 CYS X 175     174.704 137.522 226.249  1.00  0.00           H
ATOM   2788  SG  CYS X 175     176.787 137.347 225.094  1.00  0.00           S
ATOM   2789  HG  CYS X 175     176.775 136.669 223.943  1.00  0.00           H
ATOM   2790  C   CYS X 175     176.064 135.604 227.492  1.00  0.00           C
ATOM   2791  O   CYS X 175     177.097 134.908 227.503  1.00  0.00           O
ATOM   2792  N   ASN X 176     175.821 136.342 228.528  1.00  0.00           N
ATOM   2793  H   ASN X 176     175.037 136.957 228.361  1.00  0.00           H
ATOM   2794  CA  ASN X 176     176.585 136.487 229.745  1.00  0.00           C
ATOM   2795  HA  ASN X 176     177.615 136.803 229.578  1.00  0.00           H
ATOM   2796  CB  ASN X 176     176.077 137.635 230.536  1.00  0.00           C
ATOM   2797  HB2 ASN X 176     174.992 137.632 230.424  1.00  0.00           H
ATOM   2798  HB3 ASN X 176     176.454 137.514 231.552  1.00  0.00           H
ATOM   2799  CG  ASN X 176     176.600 139.014 230.224  1.00  0.00           C
ATOM   2800  OD1 ASN X 176     177.796 139.302 230.329  1.00  0.00           O
ATOM   2801  ND2 ASN X 176     175.744 139.849 229.633  1.00  0.00           N
ATOM   2802 HD21 ASN X 176     174.780 139.676 229.389  1.00  0.00           H
ATOM   2803 HD22 ASN X 176     176.142 140.671 229.200  1.00  0.00           H
ATOM   2804  C   ASN X 176     176.810 135.172 230.587  1.00  0.00           C
ATOM   2805  O   ASN X 176     177.892 134.962 231.069  1.00  0.00           O
ATOM   2806  N   VAL X 177     175.784 134.313 230.622  1.00  0.00           N
ATOM   2807  H   VAL X 177     174.857 134.581 230.325  1.00  0.00           H
ATOM   2808  CA  VAL X 177     175.885 132.921 231.117  1.00  0.00           C
ATOM   2809  HA  VAL X 177     176.192 132.979 232.161  1.00  0.00           H
ATOM   2810  CB  VAL X 177     174.631 132.084 230.964  1.00  0.00           C
ATOM   2811  HB  VAL X 177     174.502 132.008 229.885  1.00  0.00           H
ATOM   2812  CG1 VAL X 177     174.821 130.601 231.386  1.00  0.00           C
ATOM   2813 HG11 VAL X 177     175.676 130.098 230.935  1.00  0.00           H
ATOM   2814 HG12 VAL X 177     174.838 130.481 232.469  1.00  0.00           H
ATOM   2815 HG13 VAL X 177     174.050 129.929 231.008  1.00  0.00           H
ATOM   2816  CG2 VAL X 177     173.522 132.541 231.833  1.00  0.00           C
ATOM   2817 HG21 VAL X 177     173.044 133.471 231.527  1.00  0.00           H
ATOM   2818 HG22 VAL X 177     173.740 132.763 232.878  1.00  0.00           H
ATOM   2819 HG23 VAL X 177     172.784 131.742 231.906  1.00  0.00           H
ATOM   2820  C   VAL X 177     177.122 132.287 230.368  1.00  0.00           C
ATOM   2821  O   VAL X 177     178.068 131.778 231.048  1.00  0.00           O
ATOM   2822  N   ILE X 178     177.049 132.253 229.057  1.00  0.00           N
ATOM   2823  H   ILE X 178     176.201 132.579 228.616  1.00  0.00           H
ATOM   2824  CA  ILE X 178     178.178 131.824 228.202  1.00  0.00           C
ATOM   2825  HA  ILE X 178     178.429 130.828 228.565  1.00  0.00           H
ATOM   2826  CB  ILE X 178     177.787 131.662 226.680  1.00  0.00           C
ATOM   2827  HB  ILE X 178     177.882 132.645 226.219  1.00  0.00           H
ATOM   2828  CG2 ILE X 178     178.763 130.655 226.029  1.00  0.00           C
ATOM   2829 HG21 ILE X 178     178.599 130.547 224.957  1.00  0.00           H
ATOM   2830 HG22 ILE X 178     178.725 129.686 226.527  1.00  0.00           H
ATOM   2831 HG23 ILE X 178     179.779 131.039 225.944  1.00  0.00           H
ATOM   2832  CG1 ILE X 178     176.265 131.079 226.464  1.00  0.00           C
ATOM   2833 HG12 ILE X 178     176.219 130.124 226.987  1.00  0.00           H
ATOM   2834 HG13 ILE X 178     175.668 131.933 226.783  1.00  0.00           H
ATOM   2835  CD1 ILE X 178     175.773 130.701 225.062  1.00  0.00           C
ATOM   2836 HD11 ILE X 178     176.144 131.388 224.301  1.00  0.00           H
ATOM   2837 HD12 ILE X 178     174.684 130.694 225.044  1.00  0.00           H
ATOM   2838 HD13 ILE X 178     176.205 129.758 224.727  1.00  0.00           H
ATOM   2839  C   ILE X 178     179.418 132.693 228.459  1.00  0.00           C
ATOM   2840  O   ILE X 178     180.475 132.082 228.556  1.00  0.00           O
ATOM   2841  N   CYS X 179     179.408 134.022 228.585  1.00  0.00           N
ATOM   2842  H   CYS X 179     178.647 134.547 228.178  1.00  0.00           H
ATOM   2843  CA  CYS X 179     180.634 134.777 229.019  1.00  0.00           C
ATOM   2844  HA  CYS X 179     181.380 134.549 228.258  1.00  0.00           H
ATOM   2845  CB  CYS X 179     180.368 136.254 229.118  1.00  0.00           C
ATOM   2846  HB2 CYS X 179     179.643 136.467 229.903  1.00  0.00           H
ATOM   2847  HB3 CYS X 179     181.358 136.647 229.352  1.00  0.00           H
ATOM   2848  SG  CYS X 179     179.862 136.903 227.479  1.00  0.00           S
ATOM   2849  HG  CYS X 179     178.664 136.405 227.159  1.00  0.00           H
ATOM   2850  C   CYS X 179     181.183 134.208 230.395  1.00  0.00           C
ATOM   2851  O   CYS X 179     182.394 134.094 230.489  1.00  0.00           O
ATOM   2852  N   SER X 180     180.287 133.770 231.320  1.00  0.00           N
ATOM   2853  H   SER X 180     179.308 133.781 231.071  1.00  0.00           H
ATOM   2854  CA  SER X 180     180.668 133.155 232.539  1.00  0.00           C
ATOM   2855  HA  SER X 180     181.331 133.805 233.109  1.00  0.00           H
ATOM   2856  CB  SER X 180     179.499 133.115 233.505  1.00  0.00           C
ATOM   2857  HB2 SER X 180     179.085 134.118 233.600  1.00  0.00           H
ATOM   2858  HB3 SER X 180     178.703 132.416 233.248  1.00  0.00           H
ATOM   2859  OG  SER X 180     180.015 132.796 234.807  1.00  0.00           O
ATOM   2860  HG  SER X 180     179.481 133.234 235.474  1.00  0.00           H
ATOM   2861  C   SER X 180     181.361 131.742 232.333  1.00  0.00           C
ATOM   2862  O   SER X 180     182.454 131.496 232.825  1.00  0.00           O
ATOM   2863  N   ILE X 181     180.797 130.851 231.525  1.00  0.00           N
ATOM   2864  H   ILE X 181     179.889 131.034 231.123  1.00  0.00           H
ATOM   2865  CA  ILE X 181     181.361 129.524 231.285  1.00  0.00           C
ATOM   2866  HA  ILE X 181     181.717 128.955 232.144  1.00  0.00           H
ATOM   2867  CB  ILE X 181     180.342 128.606 230.446  1.00  0.00           C
ATOM   2868  HB  ILE X 181     180.007 129.232 229.618  1.00  0.00           H
ATOM   2869  CG2 ILE X 181     181.072 127.384 229.798  1.00  0.00           C
ATOM   2870 HG21 ILE X 181     181.793 126.789 230.359  1.00  0.00           H
ATOM   2871 HG22 ILE X 181     181.651 127.767 228.958  1.00  0.00           H
ATOM   2872 HG23 ILE X 181     180.343 126.695 229.370  1.00  0.00           H
ATOM   2873  CG1 ILE X 181     179.115 128.132 231.319  1.00  0.00           C
ATOM   2874 HG12 ILE X 181     179.394 127.350 232.024  1.00  0.00           H
ATOM   2875 HG13 ILE X 181     178.702 129.015 231.807  1.00  0.00           H
ATOM   2876  CD1 ILE X 181     177.908 127.682 230.479  1.00  0.00           C
ATOM   2877 HD11 ILE X 181     177.045 127.652 231.143  1.00  0.00           H
ATOM   2878 HD12 ILE X 181     177.971 126.734 229.944  1.00  0.00           H
ATOM   2879 HD13 ILE X 181     177.753 128.427 229.699  1.00  0.00           H
ATOM   2880  C   ILE X 181     182.758 129.568 230.493  1.00  0.00           C
ATOM   2881  O   ILE X 181     183.613 128.734 230.667  1.00  0.00           O
ATOM   2882  N   ILE X 182     182.864 130.496 229.500  1.00  0.00           N
ATOM   2883  H   ILE X 182     182.041 131.059 229.338  1.00  0.00           H
ATOM   2884  CA  ILE X 182     184.029 130.748 228.691  1.00  0.00           C
ATOM   2885  HA  ILE X 182     184.444 129.777 228.419  1.00  0.00           H
ATOM   2886  CB  ILE X 182     183.639 131.382 227.339  1.00  0.00           C
ATOM   2887  HB  ILE X 182     183.146 132.336 227.525  1.00  0.00           H
ATOM   2888  CG2 ILE X 182     184.774 131.707 226.404  1.00  0.00           C
ATOM   2889 HG21 ILE X 182     184.438 132.146 225.465  1.00  0.00           H
ATOM   2890 HG22 ILE X 182     185.468 130.870 226.320  1.00  0.00           H
ATOM   2891 HG23 ILE X 182     185.329 132.511 226.886  1.00  0.00           H
ATOM   2892  CG1 ILE X 182     182.649 130.411 226.621  1.00  0.00           C
ATOM   2893 HG12 ILE X 182     181.848 130.047 227.264  1.00  0.00           H
ATOM   2894 HG13 ILE X 182     182.230 130.939 225.764  1.00  0.00           H
ATOM   2895  CD1 ILE X 182     183.290 129.056 226.124  1.00  0.00           C
ATOM   2896 HD11 ILE X 182     183.009 128.292 226.848  1.00  0.00           H
ATOM   2897 HD12 ILE X 182     184.374 129.104 226.017  1.00  0.00           H
ATOM   2898 HD13 ILE X 182     182.756 128.881 225.191  1.00  0.00           H
ATOM   2899  C   ILE X 182     185.097 131.559 229.409  1.00  0.00           C
ATOM   2900  O   ILE X 182     186.218 131.040 229.554  1.00  0.00           O
ATOM   2901  N   PHE X 183     184.898 132.896 229.714  1.00  0.00           N
ATOM   2902  H   PHE X 183     183.964 133.265 229.603  1.00  0.00           H
ATOM   2903  CA  PHE X 183     185.857 133.898 230.219  1.00  0.00           C
ATOM   2904  HA  PHE X 183     186.869 133.601 229.942  1.00  0.00           H
ATOM   2905  CB  PHE X 183     185.471 135.343 229.645  1.00  0.00           C
ATOM   2906  HB2 PHE X 183     184.655 135.829 230.179  1.00  0.00           H
ATOM   2907  HB3 PHE X 183     186.349 135.969 229.803  1.00  0.00           H
ATOM   2908  CG  PHE X 183     185.232 135.382 228.098  1.00  0.00           C
ATOM   2909  CD1 PHE X 183     183.985 135.759 227.535  1.00  0.00           C
ATOM   2910  HD1 PHE X 183     183.194 135.913 228.255  1.00  0.00           H
ATOM   2911  CE1 PHE X 183     183.830 135.979 226.173  1.00  0.00           C
ATOM   2912  HE1 PHE X 183     182.943 136.466 225.796  1.00  0.00           H
ATOM   2913  CZ  PHE X 183     184.927 135.746 225.332  1.00  0.00           C
ATOM   2914  HZ  PHE X 183     184.845 136.007 224.287  1.00  0.00           H
ATOM   2915  CE2 PHE X 183     186.216 135.567 225.857  1.00  0.00           C
ATOM   2916  HE2 PHE X 183     186.994 135.524 225.109  1.00  0.00           H
ATOM   2917  CD2 PHE X 183     186.370 135.334 227.239  1.00  0.00           C
ATOM   2918  HD2 PHE X 183     187.348 135.314 227.696  1.00  0.00           H
ATOM   2919  C   PHE X 183     186.045 133.996 231.714  1.00  0.00           C
ATOM   2920  O   PHE X 183     187.013 134.617 232.105  1.00  0.00           O
ATOM   2921  N   HID X 184     185.132 133.453 232.567  1.00  0.00           N
ATOM   2922  H   HID X 184     184.330 132.967 232.193  1.00  0.00           H
ATOM   2923  CA  HID X 184     185.080 133.537 234.016  1.00  0.00           C
ATOM   2924  HA  HID X 184     184.328 132.792 234.275  1.00  0.00           H
ATOM   2925  CB  HID X 184     186.264 132.887 234.666  1.00  0.00           C
ATOM   2926  HB2 HID X 184     186.431 131.914 234.204  1.00  0.00           H
ATOM   2927  HB3 HID X 184     187.116 133.528 234.436  1.00  0.00           H
ATOM   2928  CG  HID X 184     186.336 132.687 236.164  1.00  0.00           C
ATOM   2929  ND1 HID X 184     185.244 132.676 237.001  1.00  0.00           N
ATOM   2930  HD1 HID X 184     184.296 132.818 236.685  1.00  0.00           H
ATOM   2931  CE1 HID X 184     185.653 132.858 238.273  1.00  0.00           C
ATOM   2932  HE1 HID X 184     184.971 132.891 239.109  1.00  0.00           H
ATOM   2933  NE2 HID X 184     186.991 132.753 238.348  1.00  0.00           N
ATOM   2934  CD2 HID X 184     187.417 132.757 236.988  1.00  0.00           C
ATOM   2935  HD2 HID X 184     188.429 132.892 236.634  1.00  0.00           H
ATOM   2936  C   HID X 184     184.626 134.954 234.531  1.00  0.00           C
ATOM   2937  O   HID X 184     184.987 135.330 235.663  1.00  0.00           O
ATOM   2938  N   LYS X 185     184.011 135.795 233.586  1.00  0.00           N
ATOM   2939  H   LYS X 185     183.800 135.365 232.697  1.00  0.00           H
ATOM   2940  CA  LYS X 185     183.447 137.173 233.876  1.00  0.00           C
ATOM   2941  HA  LYS X 185     183.249 137.121 234.946  1.00  0.00           H
ATOM   2942  CB  LYS X 185     184.495 138.263 233.654  1.00  0.00           C
ATOM   2943  HB2 LYS X 185     184.152 139.065 234.308  1.00  0.00           H
ATOM   2944  HB3 LYS X 185     185.447 137.910 234.051  1.00  0.00           H
ATOM   2945  CG  LYS X 185     184.664 138.799 232.250  1.00  0.00           C
ATOM   2946  HG2 LYS X 185     185.024 137.958 231.657  1.00  0.00           H
ATOM   2947  HG3 LYS X 185     183.714 139.235 231.943  1.00  0.00           H
ATOM   2948  CD  LYS X 185     185.758 139.858 232.254  1.00  0.00           C
ATOM   2949  HD2 LYS X 185     185.697 140.523 233.116  1.00  0.00           H
ATOM   2950  HD3 LYS X 185     186.748 139.414 232.356  1.00  0.00           H
ATOM   2951  CE  LYS X 185     185.840 140.600 230.939  1.00  0.00           C
ATOM   2952  HE2 LYS X 185     185.921 139.830 230.171  1.00  0.00           H
ATOM   2953  HE3 LYS X 185     184.870 141.058 230.747  1.00  0.00           H
ATOM   2954  NZ  LYS X 185     186.981 141.457 230.744  1.00  0.00           N
ATOM   2955  HZ1 LYS X 185     187.835 140.921 230.809  1.00  0.00           H
ATOM   2956  HZ2 LYS X 185     187.010 142.151 231.477  1.00  0.00           H
ATOM   2957  HZ3 LYS X 185     186.929 141.881 229.829  1.00  0.00           H
ATOM   2958  C   LYS X 185     182.226 137.400 233.072  1.00  0.00           C
ATOM   2959  O   LYS X 185     182.137 136.950 231.888  1.00  0.00           O
ATOM   2960  N   ARG X 186     181.307 138.190 233.582  1.00  0.00           N
ATOM   2961  H   ARG X 186     181.478 138.251 234.575  1.00  0.00           H
ATOM   2962  CA  ARG X 186     180.147 138.796 232.995  1.00  0.00           C
ATOM   2963  HA  ARG X 186     180.016 138.387 231.993  1.00  0.00           H
ATOM   2964  CB  ARG X 186     178.897 138.390 233.837  1.00  0.00           C
ATOM   2965  HB2 ARG X 186     178.017 138.671 233.258  1.00  0.00           H
ATOM   2966  HB3 ARG X 186     178.845 137.312 233.993  1.00  0.00           H
ATOM   2967  CG  ARG X 186     178.767 139.010 235.286  1.00  0.00           C
ATOM   2968  HG2 ARG X 186     179.625 138.638 235.846  1.00  0.00           H
ATOM   2969  HG3 ARG X 186     178.917 140.089 235.279  1.00  0.00           H
ATOM   2970  CD  ARG X 186     177.545 138.681 236.076  1.00  0.00           C
ATOM   2971  HD2 ARG X 186     176.700 139.115 235.542  1.00  0.00           H
ATOM   2972  HD3 ARG X 186     177.388 137.602 236.069  1.00  0.00           H
ATOM   2973  NE  ARG X 186     177.658 139.139 237.487  1.00  0.00           N
ATOM   2974  HE  ARG X 186     177.951 138.413 238.125  1.00  0.00           H
ATOM   2975  CZ  ARG X 186     177.556 140.356 237.941  1.00  0.00           C
ATOM   2976  NH1 ARG X 186     177.035 141.302 237.227  1.00  0.00           N
ATOM   2977 HH11 ARG X 186     176.970 141.323 236.219  1.00  0.00           H
ATOM   2978 HH12 ARG X 186     177.249 142.191 237.657  1.00  0.00           H
ATOM   2979  NH2 ARG X 186     177.996 140.595 239.130  1.00  0.00           N
ATOM   2980 HH21 ARG X 186     178.228 139.714 239.566  1.00  0.00           H
ATOM   2981 HH22 ARG X 186     178.047 141.493 239.588  1.00  0.00           H
ATOM   2982  C   ARG X 186     180.234 140.356 232.918  1.00  0.00           C
ATOM   2983  O   ARG X 186     180.868 140.988 233.736  1.00  0.00           O
ATOM   2984  N   PHE X 187     179.640 140.849 231.873  1.00  0.00           N
ATOM   2985  H   PHE X 187     179.160 140.202 231.264  1.00  0.00           H
ATOM   2986  CA  PHE X 187     179.667 142.295 231.529  1.00  0.00           C
ATOM   2987  HA  PHE X 187     180.515 142.825 231.962  1.00  0.00           H
ATOM   2988  CB  PHE X 187     179.748 142.346 230.026  1.00  0.00           C
ATOM   2989  HB2 PHE X 187     179.050 141.684 229.513  1.00  0.00           H
ATOM   2990  HB3 PHE X 187     179.456 143.344 229.700  1.00  0.00           H
ATOM   2991  CG  PHE X 187     181.151 142.081 229.431  1.00  0.00           C
ATOM   2992  CD1 PHE X 187     182.119 143.133 229.530  1.00  0.00           C
ATOM   2993  HD1 PHE X 187     181.803 143.984 230.115  1.00  0.00           H
ATOM   2994  CE1 PHE X 187     183.339 142.952 228.819  1.00  0.00           C
ATOM   2995  HE1 PHE X 187     183.949 143.817 228.606  1.00  0.00           H
ATOM   2996  CZ  PHE X 187     183.478 141.785 227.973  1.00  0.00           C
ATOM   2997  HZ  PHE X 187     184.173 141.755 227.147  1.00  0.00           H
ATOM   2998  CE2 PHE X 187     182.591 140.674 228.085  1.00  0.00           C
ATOM   2999  HE2 PHE X 187     182.857 139.716 227.662  1.00  0.00           H
ATOM   3000  CD2 PHE X 187     181.457 140.801 228.891  1.00  0.00           C
ATOM   3001  HD2 PHE X 187     180.775 139.989 229.099  1.00  0.00           H
ATOM   3002  C   PHE X 187     178.340 143.026 231.886  1.00  0.00           C
ATOM   3003  O   PHE X 187     177.364 142.324 231.990  1.00  0.00           O
ATOM   3004  N   ASP X 188     178.226 144.333 231.845  1.00  0.00           N
ATOM   3005  H   ASP X 188     179.004 144.897 231.532  1.00  0.00           H
ATOM   3006  CA  ASP X 188     176.874 145.055 231.870  1.00  0.00           C
ATOM   3007  HA  ASP X 188     176.113 144.456 232.370  1.00  0.00           H
ATOM   3008  CB  ASP X 188     177.034 146.450 232.583  1.00  0.00           C
ATOM   3009  HB2 ASP X 188     177.697 147.142 232.064  1.00  0.00           H
ATOM   3010  HB3 ASP X 188     176.055 146.930 232.585  1.00  0.00           H
ATOM   3011  CG  ASP X 188     177.736 146.091 233.995  1.00  0.00           C
ATOM   3012  OD1 ASP X 188     178.888 146.461 234.231  1.00  0.00           O
ATOM   3013  OD2 ASP X 188     177.110 145.354 234.799  1.00  0.00           O
ATOM   3014  C   ASP X 188     176.341 145.236 230.432  1.00  0.00           C
ATOM   3015  O   ASP X 188     177.107 145.436 229.533  1.00  0.00           O
ATOM   3016  N   TYR X 189     175.022 145.287 230.237  1.00  0.00           N
ATOM   3017  H   TYR X 189     174.415 145.315 231.043  1.00  0.00           H
ATOM   3018  CA  TYR X 189     174.445 144.972 228.949  1.00  0.00           C
ATOM   3019  HA  TYR X 189     174.899 144.051 228.582  1.00  0.00           H
ATOM   3020  CB  TYR X 189     172.938 144.549 229.081  1.00  0.00           C
ATOM   3021  HB2 TYR X 189     172.337 145.404 229.390  1.00  0.00           H
ATOM   3022  HB3 TYR X 189     172.511 144.288 228.112  1.00  0.00           H
ATOM   3023  CG  TYR X 189     172.641 143.364 229.937  1.00  0.00           C
ATOM   3024  CD1 TYR X 189     173.546 142.444 230.530  1.00  0.00           C
ATOM   3025  HD1 TYR X 189     174.620 142.510 230.448  1.00  0.00           H
ATOM   3026  CE1 TYR X 189     173.126 141.283 231.266  1.00  0.00           C
ATOM   3027  HE1 TYR X 189     173.920 140.684 231.686  1.00  0.00           H
ATOM   3028  CZ  TYR X 189     171.758 141.145 231.606  1.00  0.00           C
ATOM   3029  OH  TYR X 189     171.302 139.974 232.175  1.00  0.00           O
ATOM   3030  HH  TYR X 189     172.026 139.412 232.462  1.00  0.00           H
ATOM   3031  CE2 TYR X 189     170.819 142.037 230.992  1.00  0.00           C
ATOM   3032  HE2 TYR X 189     169.788 141.760 231.152  1.00  0.00           H
ATOM   3033  CD2 TYR X 189     171.258 143.061 230.088  1.00  0.00           C
ATOM   3034  HD2 TYR X 189     170.457 143.694 229.734  1.00  0.00           H
ATOM   3035  C   TYR X 189     174.683 145.942 227.781  1.00  0.00           C
ATOM   3036  O   TYR X 189     174.378 145.599 226.690  1.00  0.00           O
ATOM   3037  N   LYS X 190     175.381 147.090 228.047  1.00  0.00           N
ATOM   3038  H   LYS X 190     175.622 147.052 229.027  1.00  0.00           H
ATOM   3039  CA  LYS X 190     175.840 148.064 227.030  1.00  0.00           C
ATOM   3040  HA  LYS X 190     175.827 147.603 226.043  1.00  0.00           H
ATOM   3041  CB  LYS X 190     174.922 149.221 226.829  1.00  0.00           C
ATOM   3042  HB2 LYS X 190     174.965 149.866 227.706  1.00  0.00           H
ATOM   3043  HB3 LYS X 190     175.267 149.789 225.965  1.00  0.00           H
ATOM   3044  CG  LYS X 190     173.436 148.928 226.593  1.00  0.00           C
ATOM   3045  HG2 LYS X 190     173.383 148.392 225.646  1.00  0.00           H
ATOM   3046  HG3 LYS X 190     173.082 148.290 227.403  1.00  0.00           H
ATOM   3047  CD  LYS X 190     172.464 150.108 226.546  1.00  0.00           C
ATOM   3048  HD2 LYS X 190     172.505 150.676 227.475  1.00  0.00           H
ATOM   3049  HD3 LYS X 190     172.628 150.722 225.661  1.00  0.00           H
ATOM   3050  CE  LYS X 190     171.083 149.575 226.507  1.00  0.00           C
ATOM   3051  HE2 LYS X 190     171.050 148.839 225.703  1.00  0.00           H
ATOM   3052  HE3 LYS X 190     170.785 149.044 227.411  1.00  0.00           H
ATOM   3053  NZ  LYS X 190     170.092 150.700 226.391  1.00  0.00           N
ATOM   3054  HZ1 LYS X 190     169.131 150.399 226.321  1.00  0.00           H
ATOM   3055  HZ2 LYS X 190     170.298 151.246 225.567  1.00  0.00           H
ATOM   3056  HZ3 LYS X 190     170.136 151.249 227.238  1.00  0.00           H
ATOM   3057  C   LYS X 190     177.273 148.502 227.230  1.00  0.00           C
ATOM   3058  O   LYS X 190     177.685 149.636 226.841  1.00  0.00           O
ATOM   3059  N   ASP X 191     178.143 147.748 227.849  1.00  0.00           N
ATOM   3060  H   ASP X 191     177.652 146.972 228.270  1.00  0.00           H
ATOM   3061  CA  ASP X 191     179.557 147.877 227.811  1.00  0.00           C
ATOM   3062  HA  ASP X 191     179.781 148.853 228.242  1.00  0.00           H
ATOM   3063  CB  ASP X 191     180.187 146.815 228.780  1.00  0.00           C
ATOM   3064  HB2 ASP X 191     179.658 145.883 228.577  1.00  0.00           H
ATOM   3065  HB3 ASP X 191     181.266 146.816 228.629  1.00  0.00           H
ATOM   3066  CG  ASP X 191     180.000 147.245 230.230  1.00  0.00           C
ATOM   3067  OD1 ASP X 191     179.781 148.410 230.567  1.00  0.00           O
ATOM   3068  OD2 ASP X 191     180.217 146.375 231.158  1.00  0.00           O
ATOM   3069  C   ASP X 191     180.124 147.830 226.392  1.00  0.00           C
ATOM   3070  O   ASP X 191     179.717 146.906 225.725  1.00  0.00           O
ATOM   3071  N   GLN X 192     180.947 148.689 225.736  1.00  0.00           N
ATOM   3072  H   GLN X 192     181.089 149.527 226.281  1.00  0.00           H
ATOM   3073  CA  GLN X 192     181.318 148.545 224.321  1.00  0.00           C
ATOM   3074  HA  GLN X 192     180.423 148.504 223.701  1.00  0.00           H
ATOM   3075  CB  GLN X 192     182.162 149.855 223.965  1.00  0.00           C
ATOM   3076  HB2 GLN X 192     181.507 150.711 224.126  1.00  0.00           H
ATOM   3077  HB3 GLN X 192     182.987 149.991 224.664  1.00  0.00           H
ATOM   3078  CG  GLN X 192     182.703 149.944 222.535  1.00  0.00           C
ATOM   3079  HG2 GLN X 192     183.385 150.793 222.495  1.00  0.00           H
ATOM   3080  HG3 GLN X 192     183.294 149.104 222.169  1.00  0.00           H
ATOM   3081  CD  GLN X 192     181.755 150.286 221.367  1.00  0.00           C
ATOM   3082  OE1 GLN X 192     180.803 149.568 221.136  1.00  0.00           O
ATOM   3083  NE2 GLN X 192     181.767 151.385 220.678  1.00  0.00           N
ATOM   3084 HE21 GLN X 192     180.953 151.516 220.095  1.00  0.00           H
ATOM   3085 HE22 GLN X 192     182.513 152.058 220.782  1.00  0.00           H
ATOM   3086  C   GLN X 192     182.128 147.304 224.043  1.00  0.00           C
ATOM   3087  O   GLN X 192     182.015 146.750 222.942  1.00  0.00           O
ATOM   3088  N   GLN X 193     182.916 146.772 224.983  1.00  0.00           N
ATOM   3089  H   GLN X 193     183.096 147.237 225.862  1.00  0.00           H
ATOM   3090  CA  GLN X 193     183.619 145.445 224.937  1.00  0.00           C
ATOM   3091  HA  GLN X 193     184.090 145.327 223.962  1.00  0.00           H
ATOM   3092  CB  GLN X 193     184.832 145.448 225.913  1.00  0.00           C
ATOM   3093  HB2 GLN X 193     184.398 145.678 226.887  1.00  0.00           H
ATOM   3094  HB3 GLN X 193     185.094 144.391 225.877  1.00  0.00           H
ATOM   3095  CG  GLN X 193     186.004 146.338 225.657  1.00  0.00           C
ATOM   3096  HG2 GLN X 193     186.260 146.200 224.606  1.00  0.00           H
ATOM   3097  HG3 GLN X 193     185.691 147.378 225.751  1.00  0.00           H
ATOM   3098  CD  GLN X 193     187.177 145.976 226.583  1.00  0.00           C
ATOM   3099  OE1 GLN X 193     187.448 144.793 226.803  1.00  0.00           O
ATOM   3100  NE2 GLN X 193     187.863 146.942 227.127  1.00  0.00           N
ATOM   3101 HE21 GLN X 193     188.783 146.674 227.445  1.00  0.00           H
ATOM   3102 HE22 GLN X 193     187.687 147.879 226.796  1.00  0.00           H
ATOM   3103  C   GLN X 193     182.610 144.277 225.048  1.00  0.00           C
ATOM   3104  O   GLN X 193     183.026 143.127 224.752  1.00  0.00           O
ATOM   3105  N   PHE X 194     181.395 144.549 225.465  1.00  0.00           N
ATOM   3106  H   PHE X 194     181.197 145.514 225.687  1.00  0.00           H
ATOM   3107  CA  PHE X 194     180.252 143.662 225.340  1.00  0.00           C
ATOM   3108  HA  PHE X 194     180.758 142.697 225.319  1.00  0.00           H
ATOM   3109  CB  PHE X 194     179.473 143.694 226.638  1.00  0.00           C
ATOM   3110  HB2 PHE X 194     180.164 143.499 227.458  1.00  0.00           H
ATOM   3111  HB3 PHE X 194     179.044 144.684 226.793  1.00  0.00           H
ATOM   3112  CG  PHE X 194     178.329 142.624 226.726  1.00  0.00           C
ATOM   3113  CD1 PHE X 194     178.675 141.257 226.930  1.00  0.00           C
ATOM   3114  HD1 PHE X 194     179.650 140.830 227.116  1.00  0.00           H
ATOM   3115  CE1 PHE X 194     177.637 140.357 226.860  1.00  0.00           C
ATOM   3116  HE1 PHE X 194     177.797 139.293 226.953  1.00  0.00           H
ATOM   3117  CZ  PHE X 194     176.351 140.745 226.547  1.00  0.00           C
ATOM   3118  HZ  PHE X 194     175.559 140.012 226.591  1.00  0.00           H
ATOM   3119  CE2 PHE X 194     176.062 142.112 226.386  1.00  0.00           C
ATOM   3120  HE2 PHE X 194     175.058 142.456 226.189  1.00  0.00           H
ATOM   3121  CD2 PHE X 194     177.042 143.020 226.469  1.00  0.00           C
ATOM   3122  HD2 PHE X 194     176.868 144.081 226.368  1.00  0.00           H
ATOM   3123  C   PHE X 194     179.428 143.812 224.006  1.00  0.00           C
ATOM   3124  O   PHE X 194     179.177 142.709 223.390  1.00  0.00           O
ATOM   3125  N   LEU X 195     179.264 145.037 223.484  1.00  0.00           N
ATOM   3126  H   LEU X 195     179.529 145.823 224.060  1.00  0.00           H
ATOM   3127  CA  LEU X 195     178.391 145.260 222.354  1.00  0.00           C
ATOM   3128  HA  LEU X 195     177.414 144.790 222.462  1.00  0.00           H
ATOM   3129  CB  LEU X 195     178.162 146.728 222.202  1.00  0.00           C
ATOM   3130  HB2 LEU X 195     179.040 147.373 222.176  1.00  0.00           H
ATOM   3131  HB3 LEU X 195     177.662 146.900 221.249  1.00  0.00           H
ATOM   3132  CG  LEU X 195     177.187 147.313 223.306  1.00  0.00           C
ATOM   3133  HG  LEU X 195     177.376 146.904 224.299  1.00  0.00           H
ATOM   3134  CD1 LEU X 195     177.214 148.808 223.229  1.00  0.00           C
ATOM   3135 HD11 LEU X 195     176.912 149.091 222.221  1.00  0.00           H
ATOM   3136 HD12 LEU X 195     178.195 149.239 223.432  1.00  0.00           H
ATOM   3137 HD13 LEU X 195     176.518 149.138 224.000  1.00  0.00           H
ATOM   3138  CD2 LEU X 195     175.692 146.904 222.997  1.00  0.00           C
ATOM   3139 HD21 LEU X 195     175.526 145.833 222.883  1.00  0.00           H
ATOM   3140 HD22 LEU X 195     175.061 147.281 223.802  1.00  0.00           H
ATOM   3141 HD23 LEU X 195     175.425 147.367 222.047  1.00  0.00           H
ATOM   3142  C   LEU X 195     179.032 144.791 221.072  1.00  0.00           C
ATOM   3143  O   LEU X 195     178.249 144.449 220.135  1.00  0.00           O
ATOM   3144  N   ASN X 196     180.398 144.706 220.936  1.00  0.00           N
ATOM   3145  H   ASN X 196     180.929 145.109 221.695  1.00  0.00           H
ATOM   3146  CA  ASN X 196     181.097 144.281 219.733  1.00  0.00           C
ATOM   3147  HA  ASN X 196     180.806 144.862 218.857  1.00  0.00           H
ATOM   3148  CB  ASN X 196     182.681 144.478 219.852  1.00  0.00           C
ATOM   3149  HB2 ASN X 196     183.014 144.363 220.883  1.00  0.00           H
ATOM   3150  HB3 ASN X 196     183.193 143.794 219.175  1.00  0.00           H
ATOM   3151  CG  ASN X 196     183.048 145.805 219.473  1.00  0.00           C
ATOM   3152  OD1 ASN X 196     183.606 146.021 218.427  1.00  0.00           O
ATOM   3153  ND2 ASN X 196     182.613 146.850 220.080  1.00  0.00           N
ATOM   3154 HD21 ASN X 196     182.420 146.797 221.070  1.00  0.00           H
ATOM   3155 HD22 ASN X 196     182.890 147.713 219.633  1.00  0.00           H
ATOM   3156  C   ASN X 196     180.775 142.813 219.445  1.00  0.00           C
ATOM   3157  O   ASN X 196     180.656 142.343 218.305  1.00  0.00           O
ATOM   3158  N   LEU X 197     180.756 142.018 220.515  1.00  0.00           N
ATOM   3159  H   LEU X 197     181.021 142.446 221.390  1.00  0.00           H
ATOM   3160  CA  LEU X 197     180.385 140.591 220.457  1.00  0.00           C
ATOM   3161  HA  LEU X 197     180.839 140.106 219.593  1.00  0.00           H
ATOM   3162  CB  LEU X 197     180.780 139.957 221.815  1.00  0.00           C
ATOM   3163  HB2 LEU X 197     181.866 139.904 221.894  1.00  0.00           H
ATOM   3164  HB3 LEU X 197     180.501 140.666 222.594  1.00  0.00           H
ATOM   3165  CG  LEU X 197     180.157 138.660 222.299  1.00  0.00           C
ATOM   3166  HG  LEU X 197     179.078 138.802 222.252  1.00  0.00           H
ATOM   3167  CD1 LEU X 197     180.458 137.386 221.376  1.00  0.00           C
ATOM   3168 HD11 LEU X 197     179.756 136.586 221.613  1.00  0.00           H
ATOM   3169 HD12 LEU X 197     181.455 136.975 221.530  1.00  0.00           H
ATOM   3170 HD13 LEU X 197     180.319 137.733 220.353  1.00  0.00           H
ATOM   3171  CD2 LEU X 197     180.664 138.300 223.665  1.00  0.00           C
ATOM   3172 HD21 LEU X 197     180.209 138.953 224.409  1.00  0.00           H
ATOM   3173 HD22 LEU X 197     180.415 137.266 223.900  1.00  0.00           H
ATOM   3174 HD23 LEU X 197     181.740 138.421 223.794  1.00  0.00           H
ATOM   3175  C   LEU X 197     178.828 140.372 220.305  1.00  0.00           C
ATOM   3176  O   LEU X 197     178.379 139.594 219.471  1.00  0.00           O
ATOM   3177  N   MET X 198     178.017 141.033 221.108  1.00  0.00           N
ATOM   3178  H   MET X 198     178.399 141.744 221.716  1.00  0.00           H
ATOM   3179  CA  MET X 198     176.598 140.815 221.235  1.00  0.00           C
ATOM   3180  HA  MET X 198     176.317 139.770 221.364  1.00  0.00           H
ATOM   3181  CB  MET X 198     176.004 141.625 222.434  1.00  0.00           C
ATOM   3182  HB2 MET X 198     176.608 141.303 223.282  1.00  0.00           H
ATOM   3183  HB3 MET X 198     176.144 142.697 222.291  1.00  0.00           H
ATOM   3184  CG  MET X 198     174.465 141.505 222.645  1.00  0.00           C
ATOM   3185  HG2 MET X 198     174.198 142.439 223.139  1.00  0.00           H
ATOM   3186  HG3 MET X 198     173.990 141.654 221.676  1.00  0.00           H
ATOM   3187  SD  MET X 198     173.759 140.138 223.661  1.00  0.00           S
ATOM   3188  CE  MET X 198     173.696 138.859 222.476  1.00  0.00           C
ATOM   3189  HE1 MET X 198     173.211 137.989 222.917  1.00  0.00           H
ATOM   3190  HE2 MET X 198     173.129 139.235 221.625  1.00  0.00           H
ATOM   3191  HE3 MET X 198     174.682 138.606 222.086  1.00  0.00           H
ATOM   3192  C   MET X 198     175.878 141.180 219.922  1.00  0.00           C
ATOM   3193  O   MET X 198     175.003 140.441 219.495  1.00  0.00           O
ATOM   3194  N   GLU X 199     176.202 142.331 219.294  1.00  0.00           N
ATOM   3195  H   GLU X 199     176.848 142.940 219.776  1.00  0.00           H
ATOM   3196  CA  GLU X 199     175.608 142.817 218.057  1.00  0.00           C
ATOM   3197  HA  GLU X 199     174.540 142.934 218.240  1.00  0.00           H
ATOM   3198  CB  GLU X 199     176.234 144.194 217.684  1.00  0.00           C
ATOM   3199  HB2 GLU X 199     176.150 144.836 218.561  1.00  0.00           H
ATOM   3200  HB3 GLU X 199     177.279 143.941 217.505  1.00  0.00           H
ATOM   3201  CG  GLU X 199     175.712 144.831 216.388  1.00  0.00           C
ATOM   3202  HG2 GLU X 199     175.814 144.158 215.537  1.00  0.00           H
ATOM   3203  HG3 GLU X 199     174.644 145.011 216.516  1.00  0.00           H
ATOM   3204  CD  GLU X 199     176.372 146.099 216.069  1.00  0.00           C
ATOM   3205  OE1 GLU X 199     177.455 146.075 215.454  1.00  0.00           O
ATOM   3206  OE2 GLU X 199     175.952 147.165 216.543  1.00  0.00           O
ATOM   3207  C   GLU X 199     175.680 141.788 216.943  1.00  0.00           C
ATOM   3208  O   GLU X 199     174.712 141.691 216.099  1.00  0.00           O
ATOM   3209  N   LYS X 200     176.872 141.148 216.809  1.00  0.00           N
ATOM   3210  H   LYS X 200     177.674 141.457 217.339  1.00  0.00           H
ATOM   3211  CA  LYS X 200     177.115 140.149 215.776  1.00  0.00           C
ATOM   3212  HA  LYS X 200     176.592 140.615 214.941  1.00  0.00           H
ATOM   3213  CB  LYS X 200     178.564 140.094 215.416  1.00  0.00           C
ATOM   3214  HB2 LYS X 200     179.255 140.152 216.256  1.00  0.00           H
ATOM   3215  HB3 LYS X 200     178.775 139.150 214.913  1.00  0.00           H
ATOM   3216  CG  LYS X 200     178.979 141.134 214.355  1.00  0.00           C
ATOM   3217  HG2 LYS X 200     179.950 140.831 213.965  1.00  0.00           H
ATOM   3218  HG3 LYS X 200     178.274 141.106 213.524  1.00  0.00           H
ATOM   3219  CD  LYS X 200     179.023 142.583 214.936  1.00  0.00           C
ATOM   3220  HD2 LYS X 200     178.009 142.886 215.197  1.00  0.00           H
ATOM   3221  HD3 LYS X 200     179.657 142.729 215.810  1.00  0.00           H
ATOM   3222  CE  LYS X 200     179.562 143.473 213.780  1.00  0.00           C
ATOM   3223  HE2 LYS X 200     180.576 143.089 213.668  1.00  0.00           H
ATOM   3224  HE3 LYS X 200     179.033 143.264 212.850  1.00  0.00           H
ATOM   3225  NZ  LYS X 200     179.509 144.945 213.895  1.00  0.00           N
ATOM   3226  HZ1 LYS X 200     180.180 145.323 214.548  1.00  0.00           H
ATOM   3227  HZ2 LYS X 200     178.582 145.270 214.131  1.00  0.00           H
ATOM   3228  HZ3 LYS X 200     179.689 145.331 212.980  1.00  0.00           H
ATOM   3229  C   LYS X 200     176.490 138.723 216.071  1.00  0.00           C
ATOM   3230  O   LYS X 200     175.950 138.122 215.224  1.00  0.00           O
ATOM   3231  N   LEU X 201     176.611 138.378 217.351  1.00  0.00           N
ATOM   3232  H   LEU X 201     177.194 138.974 217.922  1.00  0.00           H
ATOM   3233  CA  LEU X 201     176.108 137.072 217.907  1.00  0.00           C
ATOM   3234  HA  LEU X 201     176.567 136.270 217.328  1.00  0.00           H
ATOM   3235  CB  LEU X 201     176.575 136.959 219.374  1.00  0.00           C
ATOM   3236  HB2 LEU X 201     177.661 136.863 219.371  1.00  0.00           H
ATOM   3237  HB3 LEU X 201     176.278 137.850 219.927  1.00  0.00           H
ATOM   3238  CG  LEU X 201     176.021 135.676 220.127  1.00  0.00           C
ATOM   3239  HG  LEU X 201     174.931 135.709 220.134  1.00  0.00           H
ATOM   3240  CD1 LEU X 201     176.558 134.435 219.372  1.00  0.00           C
ATOM   3241 HD11 LEU X 201     176.202 133.545 219.890  1.00  0.00           H
ATOM   3242 HD12 LEU X 201     177.643 134.517 219.425  1.00  0.00           H
ATOM   3243 HD13 LEU X 201     176.459 134.299 218.295  1.00  0.00           H
ATOM   3244  CD2 LEU X 201     176.304 135.651 221.610  1.00  0.00           C
ATOM   3245 HD21 LEU X 201     175.742 134.841 222.076  1.00  0.00           H
ATOM   3246 HD22 LEU X 201     177.371 135.463 221.734  1.00  0.00           H
ATOM   3247 HD23 LEU X 201     176.046 136.604 222.071  1.00  0.00           H
ATOM   3248  C   LEU X 201     174.569 136.910 217.833  1.00  0.00           C
ATOM   3249  O   LEU X 201     173.970 135.898 217.483  1.00  0.00           O
ATOM   3250  N   ASN X 202     173.966 138.082 218.010  1.00  0.00           N
ATOM   3251  H   ASN X 202     174.507 138.786 218.492  1.00  0.00           H
ATOM   3252  CA  ASN X 202     172.520 138.241 217.874  1.00  0.00           C
ATOM   3253  HA  ASN X 202     172.064 137.575 218.607  1.00  0.00           H
ATOM   3254  CB  ASN X 202     172.271 139.748 218.210  1.00  0.00           C
ATOM   3255  HB2 ASN X 202     172.560 139.898 219.250  1.00  0.00           H
ATOM   3256  HB3 ASN X 202     172.846 140.378 217.531  1.00  0.00           H
ATOM   3257  CG  ASN X 202     170.876 140.088 218.444  1.00  0.00           C
ATOM   3258  OD1 ASN X 202     170.020 139.179 218.657  1.00  0.00           O
ATOM   3259  ND2 ASN X 202     170.558 141.358 218.450  1.00  0.00           N
ATOM   3260 HD21 ASN X 202     171.217 141.919 217.930  1.00  0.00           H
ATOM   3261 HD22 ASN X 202     169.661 141.676 218.790  1.00  0.00           H
ATOM   3262  C   ASN X 202     171.944 137.904 216.480  1.00  0.00           C
ATOM   3263  O   ASN X 202     170.900 137.309 216.351  1.00  0.00           O
ATOM   3264  N   GLU X 203     172.689 138.129 215.390  1.00  0.00           N
ATOM   3265  H   GLU X 203     173.574 138.605 215.495  1.00  0.00           H
ATOM   3266  CA  GLU X 203     172.327 137.924 213.984  1.00  0.00           C
ATOM   3267  HA  GLU X 203     171.244 138.034 213.941  1.00  0.00           H
ATOM   3268  CB  GLU X 203     172.897 139.021 213.140  1.00  0.00           C
ATOM   3269  HB2 GLU X 203     173.987 139.023 213.152  1.00  0.00           H
ATOM   3270  HB3 GLU X 203     172.517 138.974 212.120  1.00  0.00           H
ATOM   3271  CG  GLU X 203     172.507 140.432 213.456  1.00  0.00           C
ATOM   3272  HG2 GLU X 203     173.094 140.630 214.352  1.00  0.00           H
ATOM   3273  HG3 GLU X 203     172.992 141.120 212.764  1.00  0.00           H
ATOM   3274  CD  GLU X 203     171.016 140.650 213.592  1.00  0.00           C
ATOM   3275  OE1 GLU X 203     170.303 140.458 212.616  1.00  0.00           O
ATOM   3276  OE2 GLU X 203     170.574 140.894 214.698  1.00  0.00           O
ATOM   3277  C   GLU X 203     172.720 136.591 213.342  1.00  0.00           C
ATOM   3278  O   GLU X 203     172.334 136.306 212.195  1.00  0.00           O
ATOM   3279  N   ASN X 204     173.569 135.861 214.093  1.00  0.00           N
ATOM   3280  H   ASN X 204     173.821 136.149 215.028  1.00  0.00           H
ATOM   3281  CA  ASN X 204     174.474 134.891 213.530  1.00  0.00           C
ATOM   3282  HA  ASN X 204     175.038 135.304 212.694  1.00  0.00           H
ATOM   3283  CB  ASN X 204     175.527 134.581 214.637  1.00  0.00           C
ATOM   3284  HB2 ASN X 204     176.161 135.433 214.881  1.00  0.00           H
ATOM   3285  HB3 ASN X 204     174.937 134.113 215.426  1.00  0.00           H
ATOM   3286  CG  ASN X 204     176.412 133.458 214.115  1.00  0.00           C
ATOM   3287  OD1 ASN X 204     176.345 132.332 214.607  1.00  0.00           O
ATOM   3288  ND2 ASN X 204     177.254 133.706 213.176  1.00  0.00           N
ATOM   3289 HD21 ASN X 204     177.359 134.631 212.786  1.00  0.00           H
ATOM   3290 HD22 ASN X 204     177.800 132.890 212.938  1.00  0.00           H
ATOM   3291  C   ASN X 204     173.638 133.668 213.032  1.00  0.00           C
ATOM   3292  O   ASN X 204     173.873 133.132 211.954  1.00  0.00           O
ATOM   3293  N   ILE X 205     172.646 133.232 213.812  1.00  0.00           N
ATOM   3294  H   ILE X 205     172.427 133.647 214.706  1.00  0.00           H
ATOM   3295  CA  ILE X 205     171.760 132.142 213.301  1.00  0.00           C
ATOM   3296  HA  ILE X 205     172.421 131.464 212.761  1.00  0.00           H
ATOM   3297  CB  ILE X 205     171.044 131.409 214.442  1.00  0.00           C
ATOM   3298  HB  ILE X 205     170.407 132.094 215.002  1.00  0.00           H
ATOM   3299  CG2 ILE X 205     170.242 130.173 214.056  1.00  0.00           C
ATOM   3300 HG21 ILE X 205     170.980 129.561 213.539  1.00  0.00           H
ATOM   3301 HG22 ILE X 205     169.279 130.468 213.639  1.00  0.00           H
ATOM   3302 HG23 ILE X 205     169.981 129.611 214.952  1.00  0.00           H
ATOM   3303  CG1 ILE X 205     172.046 130.975 215.464  1.00  0.00           C
ATOM   3304 HG12 ILE X 205     172.641 131.860 215.688  1.00  0.00           H
ATOM   3305 HG13 ILE X 205     171.538 130.574 216.341  1.00  0.00           H
ATOM   3306  CD1 ILE X 205     173.072 129.841 215.037  1.00  0.00           C
ATOM   3307 HD11 ILE X 205     173.710 129.575 215.880  1.00  0.00           H
ATOM   3308 HD12 ILE X 205     173.518 130.225 214.120  1.00  0.00           H
ATOM   3309 HD13 ILE X 205     172.576 128.880 214.902  1.00  0.00           H
ATOM   3310  C   ILE X 205     170.667 132.653 212.346  1.00  0.00           C
ATOM   3311  O   ILE X 205     170.357 131.971 211.369  1.00  0.00           O
ATOM   3312  N   LYS X 206     170.133 133.849 212.675  1.00  0.00           N
ATOM   3313  H   LYS X 206     170.340 134.123 213.625  1.00  0.00           H
ATOM   3314  CA  LYS X 206     169.220 134.701 211.847  1.00  0.00           C
ATOM   3315  HA  LYS X 206     168.262 134.202 211.701  1.00  0.00           H
ATOM   3316  CB  LYS X 206     169.009 135.995 212.568  1.00  0.00           C
ATOM   3317  HB2 LYS X 206     169.929 136.577 212.625  1.00  0.00           H
ATOM   3318  HB3 LYS X 206     168.306 136.552 211.948  1.00  0.00           H
ATOM   3319  CG  LYS X 206     168.460 135.859 213.958  1.00  0.00           C
ATOM   3320  HG2 LYS X 206     167.493 135.367 213.863  1.00  0.00           H
ATOM   3321  HG3 LYS X 206     169.134 135.221 214.530  1.00  0.00           H
ATOM   3322  CD  LYS X 206     168.134 137.225 214.655  1.00  0.00           C
ATOM   3323  HD2 LYS X 206     169.108 137.700 214.773  1.00  0.00           H
ATOM   3324  HD3 LYS X 206     167.414 137.815 214.088  1.00  0.00           H
ATOM   3325  CE  LYS X 206     167.430 137.097 216.100  1.00  0.00           C
ATOM   3326  HE2 LYS X 206     167.238 138.076 216.539  1.00  0.00           H
ATOM   3327  HE3 LYS X 206     166.535 136.489 215.967  1.00  0.00           H
ATOM   3328  NZ  LYS X 206     168.273 136.358 217.069  1.00  0.00           N
ATOM   3329  HZ1 LYS X 206     167.899 136.245 218.000  1.00  0.00           H
ATOM   3330  HZ2 LYS X 206     169.201 136.756 217.098  1.00  0.00           H
ATOM   3331  HZ3 LYS X 206     168.359 135.373 216.865  1.00  0.00           H
ATOM   3332  C   LYS X 206     169.728 134.975 210.414  1.00  0.00           C
ATOM   3333  O   LYS X 206     168.925 134.878 209.515  1.00  0.00           O
ATOM   3334  N   ILE X 207     171.053 135.134 210.149  1.00  0.00           N
ATOM   3335  H   ILE X 207     171.764 135.258 210.854  1.00  0.00           H
ATOM   3336  CA  ILE X 207     171.526 135.185 208.739  1.00  0.00           C
ATOM   3337  HA  ILE X 207     170.798 135.712 208.123  1.00  0.00           H
ATOM   3338  CB  ILE X 207     172.801 136.013 208.566  1.00  0.00           C
ATOM   3339  HB  ILE X 207     173.632 135.463 209.008  1.00  0.00           H
ATOM   3340  CG2 ILE X 207     173.139 136.378 207.115  1.00  0.00           C
ATOM   3341 HG21 ILE X 207     172.336 136.936 206.633  1.00  0.00           H
ATOM   3342 HG22 ILE X 207     173.310 135.479 206.524  1.00  0.00           H
ATOM   3343 HG23 ILE X 207     173.980 137.068 207.046  1.00  0.00           H
ATOM   3344  CG1 ILE X 207     172.793 137.310 209.379  1.00  0.00           C
ATOM   3345 HG12 ILE X 207     172.476 138.187 208.813  1.00  0.00           H
ATOM   3346 HG13 ILE X 207     172.067 137.319 210.192  1.00  0.00           H
ATOM   3347  CD1 ILE X 207     174.232 137.617 209.929  1.00  0.00           C
ATOM   3348 HD11 ILE X 207     174.243 138.539 210.510  1.00  0.00           H
ATOM   3349 HD12 ILE X 207     174.944 137.789 209.122  1.00  0.00           H
ATOM   3350 HD13 ILE X 207     174.543 136.739 210.495  1.00  0.00           H
ATOM   3351  C   ILE X 207     171.689 133.821 208.048  1.00  0.00           C
ATOM   3352  O   ILE X 207     171.303 133.616 206.911  1.00  0.00           O
ATOM   3353  N   LEU X 208     172.075 132.757 208.758  1.00  0.00           N
ATOM   3354  H   LEU X 208     172.519 132.923 209.650  1.00  0.00           H
ATOM   3355  CA  LEU X 208     172.041 131.363 208.174  1.00  0.00           C
ATOM   3356  HA  LEU X 208     172.712 131.369 207.314  1.00  0.00           H
ATOM   3357  CB  LEU X 208     172.705 130.421 209.190  1.00  0.00           C
ATOM   3358  HB2 LEU X 208     173.760 130.662 209.059  1.00  0.00           H
ATOM   3359  HB3 LEU X 208     172.344 130.813 210.141  1.00  0.00           H
ATOM   3360  CG  LEU X 208     172.512 128.853 209.062  1.00  0.00           C
ATOM   3361  HG  LEU X 208     171.444 128.705 209.218  1.00  0.00           H
ATOM   3362  CD1 LEU X 208     172.871 128.341 207.691  1.00  0.00           C
ATOM   3363 HD11 LEU X 208     173.852 128.680 207.356  1.00  0.00           H
ATOM   3364 HD12 LEU X 208     172.152 128.714 206.963  1.00  0.00           H
ATOM   3365 HD13 LEU X 208     172.883 127.251 207.693  1.00  0.00           H
ATOM   3366  CD2 LEU X 208     173.326 128.058 210.093  1.00  0.00           C
ATOM   3367 HD21 LEU X 208     173.083 127.006 209.945  1.00  0.00           H
ATOM   3368 HD22 LEU X 208     174.357 128.245 209.795  1.00  0.00           H
ATOM   3369 HD23 LEU X 208     173.212 128.517 211.076  1.00  0.00           H
ATOM   3370  C   LEU X 208     170.567 131.091 207.803  1.00  0.00           C
ATOM   3371  O   LEU X 208     170.390 130.353 206.805  1.00  0.00           O
ATOM   3372  N   SER X 209     169.525 131.529 208.535  1.00  0.00           N
ATOM   3373  H   SER X 209     169.708 132.211 209.257  1.00  0.00           H
ATOM   3374  CA  SER X 209     168.136 131.388 208.224  1.00  0.00           C
ATOM   3375  HA  SER X 209     168.021 130.370 207.850  1.00  0.00           H
ATOM   3376  CB  SER X 209     167.220 131.575 209.478  1.00  0.00           C
ATOM   3377  HB2 SER X 209     167.185 132.646 209.680  1.00  0.00           H
ATOM   3378  HB3 SER X 209     166.206 131.233 209.272  1.00  0.00           H
ATOM   3379  OG  SER X 209     167.695 131.026 210.628  1.00  0.00           O
ATOM   3380  HG  SER X 209     168.647 130.932 210.540  1.00  0.00           H
ATOM   3381  C   SER X 209     167.628 132.259 207.039  1.00  0.00           C
ATOM   3382  O   SER X 209     166.451 132.141 206.715  1.00  0.00           O
ATOM   3383  N   SER X 210     168.463 132.969 206.347  1.00  0.00           N
ATOM   3384  H   SER X 210     169.442 132.922 206.589  1.00  0.00           H
ATOM   3385  CA  SER X 210     168.204 133.654 205.082  1.00  0.00           C
ATOM   3386  HA  SER X 210     167.518 134.487 205.232  1.00  0.00           H
ATOM   3387  CB  SER X 210     169.493 134.372 204.609  1.00  0.00           C
ATOM   3388  HB2 SER X 210     169.759 135.222 205.237  1.00  0.00           H
ATOM   3389  HB3 SER X 210     170.195 133.555 204.776  1.00  0.00           H
ATOM   3390  OG  SER X 210     169.345 134.766 203.224  1.00  0.00           O
ATOM   3391  HG  SER X 210     168.944 135.638 203.257  1.00  0.00           H
ATOM   3392  C   SER X 210     167.660 132.598 204.097  1.00  0.00           C
ATOM   3393  O   SER X 210     168.342 131.575 203.846  1.00  0.00           O
ATOM   3394  N   PRO X 211     166.515 132.988 203.468  1.00  0.00           N
ATOM   3395  CD  PRO X 211     165.574 134.161 203.652  1.00  0.00           C
ATOM   3396  HD2 PRO X 211     165.901 134.976 203.006  1.00  0.00           H
ATOM   3397  HD3 PRO X 211     165.366 134.444 204.684  1.00  0.00           H
ATOM   3398  CG  PRO X 211     164.259 133.679 203.091  1.00  0.00           C
ATOM   3399  HG2 PRO X 211     163.729 134.593 202.825  1.00  0.00           H
ATOM   3400  HG3 PRO X 211     163.710 133.038 203.782  1.00  0.00           H
ATOM   3401  CB  PRO X 211     164.679 132.836 201.883  1.00  0.00           C
ATOM   3402  HB2 PRO X 211     164.915 133.504 201.054  1.00  0.00           H
ATOM   3403  HB3 PRO X 211     164.017 131.989 201.705  1.00  0.00           H
ATOM   3404  CA  PRO X 211     166.070 132.236 202.284  1.00  0.00           C
ATOM   3405  HA  PRO X 211     165.752 131.225 202.539  1.00  0.00           H
ATOM   3406  C   PRO X 211     167.133 132.114 201.173  1.00  0.00           C
ATOM   3407  O   PRO X 211     167.246 131.085 200.485  1.00  0.00           O
ATOM   3408  N   TRP X 212     167.991 133.136 200.982  1.00  0.00           N
ATOM   3409  H   TRP X 212     168.028 133.841 201.704  1.00  0.00           H
ATOM   3410  CA  TRP X 212     168.997 133.147 199.921  1.00  0.00           C
ATOM   3411  HA  TRP X 212     168.507 132.833 198.999  1.00  0.00           H
ATOM   3412  CB  TRP X 212     169.510 134.623 199.728  1.00  0.00           C
ATOM   3413  HB2 TRP X 212     169.655 135.034 200.728  1.00  0.00           H
ATOM   3414  HB3 TRP X 212     170.539 134.539 199.380  1.00  0.00           H
ATOM   3415  CG  TRP X 212     168.711 135.487 198.879  1.00  0.00           C
ATOM   3416  CD1 TRP X 212     169.083 135.893 197.648  1.00  0.00           C
ATOM   3417  HD1 TRP X 212     169.981 135.592 197.130  1.00  0.00           H
ATOM   3418  NE1 TRP X 212     168.218 136.797 197.196  1.00  0.00           N
ATOM   3419  HE1 TRP X 212     168.429 137.256 196.321  1.00  0.00           H
ATOM   3420  CE2 TRP X 212     167.363 137.214 198.164  1.00  0.00           C
ATOM   3421  CZ2 TRP X 212     166.382 138.240 198.196  1.00  0.00           C
ATOM   3422  HZ2 TRP X 212     166.248 138.985 197.427  1.00  0.00           H
ATOM   3423  CH2 TRP X 212     165.493 138.225 199.259  1.00  0.00           C
ATOM   3424  HH2 TRP X 212     164.715 138.973 199.209  1.00  0.00           H
ATOM   3425  CZ3 TRP X 212     165.518 137.295 200.249  1.00  0.00           C
ATOM   3426  HZ3 TRP X 212     164.752 137.342 201.009  1.00  0.00           H
ATOM   3427  CE3 TRP X 212     166.579 136.346 200.253  1.00  0.00           C
ATOM   3428  HE3 TRP X 212     166.735 135.627 201.043  1.00  0.00           H
ATOM   3429  CD2 TRP X 212     167.525 136.216 199.193  1.00  0.00           C
ATOM   3430  C   TRP X 212     170.159 132.150 200.203  1.00  0.00           C
ATOM   3431  O   TRP X 212     170.842 131.688 199.247  1.00  0.00           O
ATOM   3432  N   ILE X 213     170.234 131.599 201.392  1.00  0.00           N
ATOM   3433  H   ILE X 213     169.677 131.965 202.151  1.00  0.00           H
ATOM   3434  CA  ILE X 213     171.161 130.561 201.867  1.00  0.00           C
ATOM   3435  HA  ILE X 213     171.937 130.561 201.102  1.00  0.00           H
ATOM   3436  CB  ILE X 213     171.791 130.853 203.249  1.00  0.00           C
ATOM   3437  HB  ILE X 213     171.008 130.867 204.007  1.00  0.00           H
ATOM   3438  CG2 ILE X 213     172.699 129.733 203.652  1.00  0.00           C
ATOM   3439 HG21 ILE X 213     173.321 129.892 204.532  1.00  0.00           H
ATOM   3440 HG22 ILE X 213     173.251 129.592 202.723  1.00  0.00           H
ATOM   3441 HG23 ILE X 213     172.183 128.817 203.938  1.00  0.00           H
ATOM   3442  CG1 ILE X 213     172.505 132.204 203.153  1.00  0.00           C
ATOM   3443 HG12 ILE X 213     173.041 132.303 202.209  1.00  0.00           H
ATOM   3444 HG13 ILE X 213     171.745 132.981 203.231  1.00  0.00           H
ATOM   3445  CD1 ILE X 213     173.614 132.438 204.275  1.00  0.00           C
ATOM   3446 HD11 ILE X 213     174.362 131.674 204.065  1.00  0.00           H
ATOM   3447 HD12 ILE X 213     173.274 132.390 205.309  1.00  0.00           H
ATOM   3448 HD13 ILE X 213     174.074 133.420 204.157  1.00  0.00           H
ATOM   3449  C   ILE X 213     170.497 129.134 201.903  1.00  0.00           C
ATOM   3450  O   ILE X 213     170.931 128.289 201.132  1.00  0.00           O
ATOM   3451  N   GLN X 214     169.514 128.885 202.802  1.00  0.00           N
ATOM   3452  H   GLN X 214     169.293 129.600 203.481  1.00  0.00           H
ATOM   3453  CA  GLN X 214     168.635 127.759 202.797  1.00  0.00           C
ATOM   3454  HA  GLN X 214     169.192 126.997 203.342  1.00  0.00           H
ATOM   3455  CB  GLN X 214     167.347 128.043 203.528  1.00  0.00           C
ATOM   3456  HB2 GLN X 214     166.840 128.866 203.025  1.00  0.00           H
ATOM   3457  HB3 GLN X 214     166.645 127.217 203.408  1.00  0.00           H
ATOM   3458  CG  GLN X 214     167.601 128.475 204.992  1.00  0.00           C
ATOM   3459  HG2 GLN X 214     168.156 129.412 204.971  1.00  0.00           H
ATOM   3460  HG3 GLN X 214     166.671 128.641 205.536  1.00  0.00           H
ATOM   3461  CD  GLN X 214     168.371 127.443 205.822  1.00  0.00           C
ATOM   3462  OE1 GLN X 214     168.257 126.221 205.688  1.00  0.00           O
ATOM   3463  NE2 GLN X 214     169.219 127.799 206.699  1.00  0.00           N
ATOM   3464 HE21 GLN X 214     169.643 127.059 207.239  1.00  0.00           H
ATOM   3465 HE22 GLN X 214     169.528 128.758 206.630  1.00  0.00           H
ATOM   3466  C   GLN X 214     168.327 127.077 201.404  1.00  0.00           C
ATOM   3467  O   GLN X 214     168.296 125.847 201.297  1.00  0.00           O
ATOM   3468  N   ILE X 215     168.005 127.911 200.391  1.00  0.00           N
ATOM   3469  H   ILE X 215     167.896 128.876 200.667  1.00  0.00           H
ATOM   3470  CA  ILE X 215     167.545 127.468 199.055  1.00  0.00           C
ATOM   3471  HA  ILE X 215     167.028 126.508 199.059  1.00  0.00           H
ATOM   3472  CB  ILE X 215     166.564 128.499 198.403  1.00  0.00           C
ATOM   3473  HB  ILE X 215     167.168 129.404 198.353  1.00  0.00           H
ATOM   3474  CG2 ILE X 215     166.259 128.113 196.907  1.00  0.00           C
ATOM   3475 HG21 ILE X 215     165.574 128.865 196.516  1.00  0.00           H
ATOM   3476 HG22 ILE X 215     165.951 127.072 196.807  1.00  0.00           H
ATOM   3477 HG23 ILE X 215     167.199 128.150 196.356  1.00  0.00           H
ATOM   3478  CG1 ILE X 215     165.317 128.753 199.263  1.00  0.00           C
ATOM   3479 HG12 ILE X 215     165.639 129.364 200.107  1.00  0.00           H
ATOM   3480 HG13 ILE X 215     164.582 129.325 198.697  1.00  0.00           H
ATOM   3481  CD1 ILE X 215     164.559 127.532 199.733  1.00  0.00           C
ATOM   3482 HD11 ILE X 215     165.189 126.679 199.984  1.00  0.00           H
ATOM   3483 HD12 ILE X 215     163.926 127.190 198.914  1.00  0.00           H
ATOM   3484 HD13 ILE X 215     163.967 127.774 200.616  1.00  0.00           H
ATOM   3485  C   ILE X 215     168.713 127.101 198.150  1.00  0.00           C
ATOM   3486  O   ILE X 215     168.751 126.112 197.398  1.00  0.00           O
ATOM   3487  N   CYS X 216     169.736 127.949 198.112  1.00  0.00           N
ATOM   3488  H   CYS X 216     169.610 128.655 198.823  1.00  0.00           H
ATOM   3489  CA  CYS X 216     171.072 127.676 197.579  1.00  0.00           C
ATOM   3490  HA  CYS X 216     170.865 127.533 196.519  1.00  0.00           H
ATOM   3491  CB  CYS X 216     171.962 128.906 197.755  1.00  0.00           C
ATOM   3492  HB2 CYS X 216     171.864 129.291 198.770  1.00  0.00           H
ATOM   3493  HB3 CYS X 216     172.998 128.589 197.642  1.00  0.00           H
ATOM   3494  SG  CYS X 216     171.499 130.287 196.643  1.00  0.00           S
ATOM   3495  HG  CYS X 216     170.778 130.904 197.583  1.00  0.00           H
ATOM   3496  C   CYS X 216     171.785 126.450 198.131  1.00  0.00           C
ATOM   3497  O   CYS X 216     172.779 125.957 197.592  1.00  0.00           O
ATOM   3498  N   ASN X 217     171.390 125.938 199.308  1.00  0.00           N
ATOM   3499  H   ASN X 217     170.760 126.469 199.893  1.00  0.00           H
ATOM   3500  CA  ASN X 217     171.845 124.659 199.791  1.00  0.00           C
ATOM   3501  HA  ASN X 217     172.932 124.709 199.854  1.00  0.00           H
ATOM   3502  CB  ASN X 217     171.231 124.398 201.182  1.00  0.00           C
ATOM   3503  HB2 ASN X 217     171.195 125.355 201.702  1.00  0.00           H
ATOM   3504  HB3 ASN X 217     170.238 123.975 201.027  1.00  0.00           H
ATOM   3505  CG  ASN X 217     171.995 123.405 202.057  1.00  0.00           C
ATOM   3506  OD1 ASN X 217     173.188 123.136 201.919  1.00  0.00           O
ATOM   3507  ND2 ASN X 217     171.250 122.884 202.990  1.00  0.00           N
ATOM   3508 HD21 ASN X 217     170.256 122.818 202.822  1.00  0.00           H
ATOM   3509 HD22 ASN X 217     171.625 122.131 203.548  1.00  0.00           H
ATOM   3510  C   ASN X 217     171.642 123.396 198.870  1.00  0.00           C
ATOM   3511  O   ASN X 217     172.154 122.278 199.057  1.00  0.00           O
ATOM   3512  N   ASN X 218     170.935 123.621 197.742  1.00  0.00           N
ATOM   3513  H   ASN X 218     170.534 124.543 197.644  1.00  0.00           H
ATOM   3514  CA  ASN X 218     170.613 122.630 196.722  1.00  0.00           C
ATOM   3515  HA  ASN X 218     170.955 121.613 196.914  1.00  0.00           H
ATOM   3516  CB  ASN X 218     169.056 122.735 196.559  1.00  0.00           C
ATOM   3517  HB2 ASN X 218     168.769 123.732 196.225  1.00  0.00           H
ATOM   3518  HB3 ASN X 218     168.664 122.012 195.843  1.00  0.00           H
ATOM   3519  CG  ASN X 218     168.240 122.591 197.841  1.00  0.00           C
ATOM   3520  OD1 ASN X 218     168.365 121.753 198.659  1.00  0.00           O
ATOM   3521  ND2 ASN X 218     167.402 123.552 198.057  1.00  0.00           N
ATOM   3522 HD21 ASN X 218     167.337 124.398 197.509  1.00  0.00           H
ATOM   3523 HD22 ASN X 218     166.963 123.536 198.966  1.00  0.00           H
ATOM   3524  C   ASN X 218     171.250 123.064 195.424  1.00  0.00           C
ATOM   3525  O   ASN X 218     171.020 122.351 194.409  1.00  0.00           O
ATOM   3526  N   PHE X 219     172.082 124.130 195.385  1.00  0.00           N
ATOM   3527  H   PHE X 219     172.243 124.592 196.268  1.00  0.00           H
ATOM   3528  CA  PHE X 219     172.787 124.647 194.246  1.00  0.00           C
ATOM   3529  HA  PHE X 219     172.899 123.946 193.418  1.00  0.00           H
ATOM   3530  CB  PHE X 219     172.016 125.890 193.701  1.00  0.00           C
ATOM   3531  HB2 PHE X 219     172.004 126.683 194.449  1.00  0.00           H
ATOM   3532  HB3 PHE X 219     172.567 126.293 192.852  1.00  0.00           H
ATOM   3533  CG  PHE X 219     170.661 125.737 193.112  1.00  0.00           C
ATOM   3534  CD1 PHE X 219     169.503 126.176 193.773  1.00  0.00           C
ATOM   3535  HD1 PHE X 219     169.523 126.767 194.676  1.00  0.00           H
ATOM   3536  CE1 PHE X 219     168.217 125.924 193.300  1.00  0.00           C
ATOM   3537  HE1 PHE X 219     167.378 126.168 193.936  1.00  0.00           H
ATOM   3538  CZ  PHE X 219     168.079 125.278 192.094  1.00  0.00           C
ATOM   3539  HZ  PHE X 219     167.087 125.098 191.707  1.00  0.00           H
ATOM   3540  CE2 PHE X 219     169.213 124.764 191.339  1.00  0.00           C
ATOM   3541  HE2 PHE X 219     169.084 124.312 190.367  1.00  0.00           H
ATOM   3542  CD2 PHE X 219     170.474 125.013 191.936  1.00  0.00           C
ATOM   3543  HD2 PHE X 219     171.362 124.691 191.413  1.00  0.00           H
ATOM   3544  C   PHE X 219     174.214 125.113 194.582  1.00  0.00           C
ATOM   3545  O   PHE X 219     174.775 125.856 193.800  1.00  0.00           O
ATOM   3546  N   SER X 220     174.880 124.593 195.639  1.00  0.00           N
ATOM   3547  H   SER X 220     174.265 123.936 196.098  1.00  0.00           H
ATOM   3548  CA  SER X 220     176.206 124.906 196.228  1.00  0.00           C
ATOM   3549  HA  SER X 220     175.803 125.598 196.968  1.00  0.00           H
ATOM   3550  CB  SER X 220     176.718 123.639 196.960  1.00  0.00           C
ATOM   3551  HB2 SER X 220     175.939 123.330 197.657  1.00  0.00           H
ATOM   3552  HB3 SER X 220     176.927 122.861 196.225  1.00  0.00           H
ATOM   3553  OG  SER X 220     177.887 123.847 197.711  1.00  0.00           O
ATOM   3554  HG  SER X 220     177.902 123.171 198.393  1.00  0.00           H
ATOM   3555  C   SER X 220     177.402 125.429 195.359  1.00  0.00           C
ATOM   3556  O   SER X 220     177.777 126.536 195.681  1.00  0.00           O
ATOM   3557  N   PRO X 221     177.892 124.725 194.332  1.00  0.00           N
ATOM   3558  CD  PRO X 221     177.281 123.492 193.731  1.00  0.00           C
ATOM   3559  HD2 PRO X 221     176.230 123.378 193.995  1.00  0.00           H
ATOM   3560  HD3 PRO X 221     177.770 122.591 194.100  1.00  0.00           H
ATOM   3561  CG  PRO X 221     177.464 123.779 192.259  1.00  0.00           C
ATOM   3562  HG2 PRO X 221     176.717 124.498 191.926  1.00  0.00           H
ATOM   3563  HG3 PRO X 221     177.361 122.830 191.732  1.00  0.00           H
ATOM   3564  CB  PRO X 221     178.930 124.282 192.265  1.00  0.00           C
ATOM   3565  HB2 PRO X 221     179.135 124.728 191.292  1.00  0.00           H
ATOM   3566  HB3 PRO X 221     179.579 123.425 192.444  1.00  0.00           H
ATOM   3567  CA  PRO X 221     178.956 125.207 193.450  1.00  0.00           C
ATOM   3568  HA  PRO X 221     179.913 125.042 193.946  1.00  0.00           H
ATOM   3569  C   PRO X 221     178.895 126.674 193.126  1.00  0.00           C
ATOM   3570  O   PRO X 221     179.953 127.327 193.036  1.00  0.00           O
ATOM   3571  N   ILE X 222     177.720 127.186 192.780  1.00  0.00           N
ATOM   3572  H   ILE X 222     176.959 126.521 192.762  1.00  0.00           H
ATOM   3573  CA  ILE X 222     177.557 128.523 192.228  1.00  0.00           C
ATOM   3574  HA  ILE X 222     178.273 128.526 191.406  1.00  0.00           H
ATOM   3575  CB  ILE X 222     176.127 128.715 191.699  1.00  0.00           C
ATOM   3576  HB  ILE X 222     175.793 127.774 191.260  1.00  0.00           H
ATOM   3577  CG2 ILE X 222     175.103 129.014 192.822  1.00  0.00           C
ATOM   3578 HG21 ILE X 222     175.241 128.340 193.668  1.00  0.00           H
ATOM   3579 HG22 ILE X 222     174.175 129.255 192.304  1.00  0.00           H
ATOM   3580 HG23 ILE X 222     175.344 129.981 193.264  1.00  0.00           H
ATOM   3581  CG1 ILE X 222     175.968 129.903 190.682  1.00  0.00           C
ATOM   3582 HG12 ILE X 222     174.963 129.825 190.267  1.00  0.00           H
ATOM   3583 HG13 ILE X 222     176.161 130.838 191.207  1.00  0.00           H
ATOM   3584  CD1 ILE X 222     176.896 129.780 189.525  1.00  0.00           C
ATOM   3585 HD11 ILE X 222     177.901 130.116 189.779  1.00  0.00           H
ATOM   3586 HD12 ILE X 222     176.554 130.441 188.729  1.00  0.00           H
ATOM   3587 HD13 ILE X 222     176.960 128.782 189.091  1.00  0.00           H
ATOM   3588  C   ILE X 222     178.067 129.668 193.150  1.00  0.00           C
ATOM   3589  O   ILE X 222     178.405 130.778 192.709  1.00  0.00           O
ATOM   3590  N   ILE X 223     178.115 129.322 194.431  1.00  0.00           N
ATOM   3591  H   ILE X 223     177.787 128.432 194.777  1.00  0.00           H
ATOM   3592  CA  ILE X 223     178.342 130.314 195.506  1.00  0.00           C
ATOM   3593  HA  ILE X 223     177.926 131.283 195.230  1.00  0.00           H
ATOM   3594  CB  ILE X 223     177.651 129.829 196.771  1.00  0.00           C
ATOM   3595  HB  ILE X 223     177.930 128.802 197.009  1.00  0.00           H
ATOM   3596  CG2 ILE X 223     178.029 130.585 197.978  1.00  0.00           C
ATOM   3597 HG21 ILE X 223     177.451 130.325 198.865  1.00  0.00           H
ATOM   3598 HG22 ILE X 223     177.672 131.604 197.829  1.00  0.00           H
ATOM   3599 HG23 ILE X 223     179.092 130.536 198.212  1.00  0.00           H
ATOM   3600  CG1 ILE X 223     176.163 129.795 196.622  1.00  0.00           C
ATOM   3601 HG12 ILE X 223     175.918 129.106 195.813  1.00  0.00           H
ATOM   3602 HG13 ILE X 223     175.778 129.390 197.558  1.00  0.00           H
ATOM   3603  CD1 ILE X 223     175.422 131.119 196.182  1.00  0.00           C
ATOM   3604 HD11 ILE X 223     175.638 131.273 195.125  1.00  0.00           H
ATOM   3605 HD12 ILE X 223     175.817 131.984 196.715  1.00  0.00           H
ATOM   3606 HD13 ILE X 223     174.343 131.042 196.312  1.00  0.00           H
ATOM   3607  C   ILE X 223     179.840 130.630 195.565  1.00  0.00           C
ATOM   3608  O   ILE X 223     180.239 131.485 196.381  1.00  0.00           O
ATOM   3609  N   ASP X 224     180.730 130.013 194.751  1.00  0.00           N
ATOM   3610  H   ASP X 224     180.505 129.174 194.235  1.00  0.00           H
ATOM   3611  CA  ASP X 224     182.124 130.582 194.516  1.00  0.00           C
ATOM   3612  HA  ASP X 224     182.432 131.051 195.451  1.00  0.00           H
ATOM   3613  CB  ASP X 224     183.015 129.442 194.036  1.00  0.00           C
ATOM   3614  HB2 ASP X 224     182.468 129.058 193.175  1.00  0.00           H
ATOM   3615  HB3 ASP X 224     183.947 129.862 193.657  1.00  0.00           H
ATOM   3616  CG  ASP X 224     183.342 128.404 195.122  1.00  0.00           C
ATOM   3617  OD1 ASP X 224     183.547 127.191 194.999  1.00  0.00           O
ATOM   3618  OD2 ASP X 224     183.481 128.907 196.277  1.00  0.00           O
ATOM   3619  C   ASP X 224     182.114 131.688 193.473  1.00  0.00           C
ATOM   3620  O   ASP X 224     182.863 132.664 193.678  1.00  0.00           O
ATOM   3621  N   TYR X 225     181.310 131.609 192.437  1.00  0.00           N
ATOM   3622  H   TYR X 225     180.682 130.818 192.428  1.00  0.00           H
ATOM   3623  CA  TYR X 225     181.214 132.620 191.344  1.00  0.00           C
ATOM   3624  HA  TYR X 225     182.201 133.055 191.185  1.00  0.00           H
ATOM   3625  CB  TYR X 225     180.754 131.862 190.119  1.00  0.00           C
ATOM   3626  HB2 TYR X 225     179.756 131.484 190.341  1.00  0.00           H
ATOM   3627  HB3 TYR X 225     180.692 132.598 189.317  1.00  0.00           H
ATOM   3628  CG  TYR X 225     181.673 130.726 189.648  1.00  0.00           C
ATOM   3629  CD1 TYR X 225     182.612 131.030 188.605  1.00  0.00           C
ATOM   3630  HD1 TYR X 225     182.598 132.045 188.236  1.00  0.00           H
ATOM   3631  CE1 TYR X 225     183.535 130.099 188.174  1.00  0.00           C
ATOM   3632  HE1 TYR X 225     184.318 130.316 187.462  1.00  0.00           H
ATOM   3633  CZ  TYR X 225     183.560 128.855 188.833  1.00  0.00           C
ATOM   3634  OH  TYR X 225     184.495 127.979 188.541  1.00  0.00           O
ATOM   3635  HH  TYR X 225     184.309 127.061 188.753  1.00  0.00           H
ATOM   3636  CE2 TYR X 225     182.607 128.456 189.857  1.00  0.00           C
ATOM   3637  HE2 TYR X 225     182.807 127.507 190.333  1.00  0.00           H
ATOM   3638  CD2 TYR X 225     181.593 129.380 190.179  1.00  0.00           C
ATOM   3639  HD2 TYR X 225     180.959 129.195 191.034  1.00  0.00           H
ATOM   3640  C   TYR X 225     180.300 133.797 191.703  1.00  0.00           C
ATOM   3641  O   TYR X 225     180.558 134.866 191.154  1.00  0.00           O
ATOM   3642  N   PHE X 226     179.242 133.710 192.624  1.00  0.00           N
ATOM   3643  H   PHE X 226     178.933 132.796 192.923  1.00  0.00           H
ATOM   3644  CA  PHE X 226     178.336 134.839 192.997  1.00  0.00           C
ATOM   3645  HA  PHE X 226     178.752 135.812 192.737  1.00  0.00           H
ATOM   3646  CB  PHE X 226     177.008 134.755 192.141  1.00  0.00           C
ATOM   3647  HB2 PHE X 226     176.465 133.835 192.355  1.00  0.00           H
ATOM   3648  HB3 PHE X 226     176.407 135.615 192.436  1.00  0.00           H
ATOM   3649  CG  PHE X 226     177.265 134.724 190.679  1.00  0.00           C
ATOM   3650  CD1 PHE X 226     177.752 135.790 189.984  1.00  0.00           C
ATOM   3651  HD1 PHE X 226     177.792 136.737 190.501  1.00  0.00           H
ATOM   3652  CE1 PHE X 226     178.109 135.633 188.634  1.00  0.00           C
ATOM   3653  HE1 PHE X 226     178.543 136.455 188.084  1.00  0.00           H
ATOM   3654  CZ  PHE X 226     177.716 134.496 187.983  1.00  0.00           C
ATOM   3655  HZ  PHE X 226     177.808 134.468 186.907  1.00  0.00           H
ATOM   3656  CE2 PHE X 226     177.208 133.380 188.679  1.00  0.00           C
ATOM   3657  HE2 PHE X 226     176.970 132.467 188.153  1.00  0.00           H
ATOM   3658  CD2 PHE X 226     177.024 133.491 190.022  1.00  0.00           C
ATOM   3659  HD2 PHE X 226     176.854 132.661 190.692  1.00  0.00           H
ATOM   3660  C   PHE X 226     178.082 134.778 194.540  1.00  0.00           C
ATOM   3661  O   PHE X 226     176.980 134.663 195.059  1.00  0.00           O
ATOM   3662  N   PRO X 227     179.159 134.875 195.319  1.00  0.00           N
ATOM   3663  CD  PRO X 227     180.520 135.171 194.927  1.00  0.00           C
ATOM   3664  HD2 PRO X 227     180.604 136.235 194.709  1.00  0.00           H
ATOM   3665  HD3 PRO X 227     180.789 134.445 194.159  1.00  0.00           H
ATOM   3666  CG  PRO X 227     181.466 134.788 196.096  1.00  0.00           C
ATOM   3667  HG2 PRO X 227     182.295 135.494 196.148  1.00  0.00           H
ATOM   3668  HG3 PRO X 227     181.823 133.777 195.899  1.00  0.00           H
ATOM   3669  CB  PRO X 227     180.578 134.736 197.267  1.00  0.00           C
ATOM   3670  HB2 PRO X 227     180.690 135.667 197.822  1.00  0.00           H
ATOM   3671  HB3 PRO X 227     180.735 133.882 197.927  1.00  0.00           H
ATOM   3672  CA  PRO X 227     179.117 134.617 196.773  1.00  0.00           C
ATOM   3673  HA  PRO X 227     178.842 133.573 196.922  1.00  0.00           H
ATOM   3674  C   PRO X 227     178.322 135.504 197.733  1.00  0.00           C
ATOM   3675  O   PRO X 227     178.380 135.323 199.020  1.00  0.00           O
ATOM   3676  N   GLY X 228     177.331 136.304 197.259  1.00  0.00           N
ATOM   3677  H   GLY X 228     177.191 136.240 196.261  1.00  0.00           H
ATOM   3678  CA  GLY X 228     176.388 137.157 197.999  1.00  0.00           C
ATOM   3679  HA2 GLY X 228     176.970 137.899 198.546  1.00  0.00           H
ATOM   3680  HA3 GLY X 228     175.589 137.571 197.385  1.00  0.00           H
ATOM   3681  C   GLY X 228     175.538 136.467 199.075  1.00  0.00           C
ATOM   3682  O   GLY X 228     175.140 135.282 199.021  1.00  0.00           O
ATOM   3683  N   THR X 229     175.256 137.216 200.115  1.00  0.00           N
ATOM   3684  H   THR X 229     175.658 138.143 200.117  1.00  0.00           H
ATOM   3685  CA  THR X 229     174.692 136.864 201.417  1.00  0.00           C
ATOM   3686  HA  THR X 229     174.837 137.828 201.905  1.00  0.00           H
ATOM   3687  CB  THR X 229     173.242 136.342 201.303  1.00  0.00           C
ATOM   3688  HB  THR X 229     173.279 135.473 200.646  1.00  0.00           H
ATOM   3689  CG2 THR X 229     172.768 136.044 202.675  1.00  0.00           C
ATOM   3690 HG21 THR X 229     173.172 136.846 203.292  1.00  0.00           H
ATOM   3691 HG22 THR X 229     172.959 135.013 202.973  1.00  0.00           H
ATOM   3692 HG23 THR X 229     171.684 136.148 202.730  1.00  0.00           H
ATOM   3693  OG1 THR X 229     172.454 137.302 200.655  1.00  0.00           O
ATOM   3694  HG1 THR X 229     172.439 136.960 199.758  1.00  0.00           H
ATOM   3695  C   THR X 229     175.588 135.794 202.179  1.00  0.00           C
ATOM   3696  O   THR X 229     175.875 135.977 203.275  1.00  0.00           O
ATOM   3697  N   HID X 230     176.186 134.802 201.565  1.00  0.00           N
ATOM   3698  H   HID X 230     176.012 134.842 200.571  1.00  0.00           H
ATOM   3699  CA  HID X 230     176.987 133.807 202.215  1.00  0.00           C
ATOM   3700  HA  HID X 230     176.477 133.360 203.069  1.00  0.00           H
ATOM   3701  CB  HID X 230     177.373 132.712 201.164  1.00  0.00           C
ATOM   3702  HB2 HID X 230     177.758 133.300 200.331  1.00  0.00           H
ATOM   3703  HB3 HID X 230     178.098 131.938 201.416  1.00  0.00           H
ATOM   3704  CG  HID X 230     176.206 132.039 200.536  1.00  0.00           C
ATOM   3705  ND1 HID X 230     175.222 132.637 199.746  1.00  0.00           N
ATOM   3706  HD1 HID X 230     175.293 133.519 199.260  1.00  0.00           H
ATOM   3707  CE1 HID X 230     174.192 131.764 199.611  1.00  0.00           C
ATOM   3708  HE1 HID X 230     173.356 132.083 199.006  1.00  0.00           H
ATOM   3709  NE2 HID X 230     174.458 130.634 200.307  1.00  0.00           N
ATOM   3710  CD2 HID X 230     175.727 130.797 200.916  1.00  0.00           C
ATOM   3711  HD2 HID X 230     176.169 130.087 201.600  1.00  0.00           H
ATOM   3712  C   HID X 230     178.320 134.376 202.765  1.00  0.00           C
ATOM   3713  O   HID X 230     178.699 134.060 203.914  1.00  0.00           O
ATOM   3714  N   ASN X 231     178.996 135.260 202.004  1.00  0.00           N
ATOM   3715  H   ASN X 231     178.624 135.252 201.065  1.00  0.00           H
ATOM   3716  CA  ASN X 231     180.204 136.077 202.233  1.00  0.00           C
ATOM   3717  HA  ASN X 231     180.993 135.400 202.562  1.00  0.00           H
ATOM   3718  CB  ASN X 231     180.668 136.772 200.956  1.00  0.00           C
ATOM   3719  HB2 ASN X 231     180.888 136.038 200.181  1.00  0.00           H
ATOM   3720  HB3 ASN X 231     179.847 137.373 200.566  1.00  0.00           H
ATOM   3721  CG  ASN X 231     181.883 137.729 201.184  1.00  0.00           C
ATOM   3722  OD1 ASN X 231     182.888 137.381 201.735  1.00  0.00           O
ATOM   3723  ND2 ASN X 231     181.706 138.967 200.807  1.00  0.00           N
ATOM   3724 HD21 ASN X 231     180.834 139.163 200.336  1.00  0.00           H
ATOM   3725 HD22 ASN X 231     182.509 139.561 200.958  1.00  0.00           H
ATOM   3726  C   ASN X 231     179.906 137.023 203.419  1.00  0.00           C
ATOM   3727  O   ASN X 231     180.674 137.033 204.405  1.00  0.00           O
ATOM   3728  N   LYS X 232     178.799 137.780 203.351  1.00  0.00           N
ATOM   3729  H   LYS X 232     178.238 137.744 202.511  1.00  0.00           H
ATOM   3730  CA  LYS X 232     178.188 138.516 204.601  1.00  0.00           C
ATOM   3731  HA  LYS X 232     178.825 139.359 204.866  1.00  0.00           H
ATOM   3732  CB  LYS X 232     176.826 139.174 204.337  1.00  0.00           C
ATOM   3733  HB2 LYS X 232     177.062 139.934 203.591  1.00  0.00           H
ATOM   3734  HB3 LYS X 232     176.200 138.500 203.753  1.00  0.00           H
ATOM   3735  CG  LYS X 232     176.053 139.825 205.493  1.00  0.00           C
ATOM   3736  HG2 LYS X 232     175.850 139.065 206.247  1.00  0.00           H
ATOM   3737  HG3 LYS X 232     176.606 140.643 205.954  1.00  0.00           H
ATOM   3738  CD  LYS X 232     174.813 140.435 204.933  1.00  0.00           C
ATOM   3739  HD2 LYS X 232     175.021 141.257 204.248  1.00  0.00           H
ATOM   3740  HD3 LYS X 232     174.298 139.673 204.349  1.00  0.00           H
ATOM   3741  CE  LYS X 232     174.052 141.055 206.123  1.00  0.00           C
ATOM   3742  HE2 LYS X 232     173.967 140.295 206.901  1.00  0.00           H
ATOM   3743  HE3 LYS X 232     174.565 141.975 206.402  1.00  0.00           H
ATOM   3744  NZ  LYS X 232     172.730 141.417 205.680  1.00  0.00           N
ATOM   3745  HZ1 LYS X 232     172.105 140.682 205.382  1.00  0.00           H
ATOM   3746  HZ2 LYS X 232     172.785 142.218 205.067  1.00  0.00           H
ATOM   3747  HZ3 LYS X 232     172.194 141.814 206.439  1.00  0.00           H
ATOM   3748  C   LYS X 232     178.043 137.545 205.830  1.00  0.00           C
ATOM   3749  O   LYS X 232     178.388 138.002 206.961  1.00  0.00           O
ATOM   3750  N   LEU X 233     177.515 136.343 205.682  1.00  0.00           N
ATOM   3751  H   LEU X 233     177.371 135.979 204.751  1.00  0.00           H
ATOM   3752  CA  LEU X 233     177.517 135.420 206.832  1.00  0.00           C
ATOM   3753  HA  LEU X 233     176.988 136.008 207.582  1.00  0.00           H
ATOM   3754  CB  LEU X 233     176.682 134.140 206.573  1.00  0.00           C
ATOM   3755  HB2 LEU X 233     175.677 134.364 206.215  1.00  0.00           H
ATOM   3756  HB3 LEU X 233     177.103 133.574 205.742  1.00  0.00           H
ATOM   3757  CG  LEU X 233     176.648 133.185 207.743  1.00  0.00           C
ATOM   3758  HG  LEU X 233     177.609 132.757 208.029  1.00  0.00           H
ATOM   3759  CD1 LEU X 233     176.031 133.826 209.061  1.00  0.00           C
ATOM   3760 HD11 LEU X 233     175.376 133.169 209.633  1.00  0.00           H
ATOM   3761 HD12 LEU X 233     175.511 134.751 208.813  1.00  0.00           H
ATOM   3762 HD13 LEU X 233     176.882 134.099 209.684  1.00  0.00           H
ATOM   3763  CD2 LEU X 233     175.686 132.026 207.400  1.00  0.00           C
ATOM   3764 HD21 LEU X 233     176.062 131.511 206.516  1.00  0.00           H
ATOM   3765 HD22 LEU X 233     175.695 131.322 208.233  1.00  0.00           H
ATOM   3766 HD23 LEU X 233     174.678 132.426 207.293  1.00  0.00           H
ATOM   3767  C   LEU X 233     178.907 135.022 207.386  1.00  0.00           C
ATOM   3768  O   LEU X 233     179.226 135.027 208.555  1.00  0.00           O
ATOM   3769  N   LEU X 234     179.879 134.696 206.538  1.00  0.00           N
ATOM   3770  H   LEU X 234     179.696 134.667 205.545  1.00  0.00           H
ATOM   3771  CA  LEU X 234     181.315 134.510 206.911  1.00  0.00           C
ATOM   3772  HA  LEU X 234     181.461 133.601 207.494  1.00  0.00           H
ATOM   3773  CB  LEU X 234     182.176 134.304 205.629  1.00  0.00           C
ATOM   3774  HB2 LEU X 234     181.876 133.368 205.157  1.00  0.00           H
ATOM   3775  HB3 LEU X 234     181.885 135.127 204.976  1.00  0.00           H
ATOM   3776  CG  LEU X 234     183.683 134.170 205.843  1.00  0.00           C
ATOM   3777  HG  LEU X 234     184.070 135.039 206.377  1.00  0.00           H
ATOM   3778  CD1 LEU X 234     183.999 133.038 206.798  1.00  0.00           C
ATOM   3779 HD11 LEU X 234     185.088 133.010 206.770  1.00  0.00           H
ATOM   3780 HD12 LEU X 234     183.413 132.154 206.545  1.00  0.00           H
ATOM   3781 HD13 LEU X 234     183.696 133.163 207.838  1.00  0.00           H
ATOM   3782  CD2 LEU X 234     184.309 133.989 204.451  1.00  0.00           C
ATOM   3783 HD21 LEU X 234     183.939 133.045 204.052  1.00  0.00           H
ATOM   3784 HD22 LEU X 234     184.004 134.799 203.788  1.00  0.00           H
ATOM   3785 HD23 LEU X 234     185.398 133.966 204.489  1.00  0.00           H
ATOM   3786  C   LEU X 234     181.833 135.721 207.706  1.00  0.00           C
ATOM   3787  O   LEU X 234     182.362 135.557 208.770  1.00  0.00           O
ATOM   3788  N   LYS X 235     181.589 136.976 207.193  1.00  0.00           N
ATOM   3789  H   LYS X 235     181.135 137.118 206.302  1.00  0.00           H
ATOM   3790  CA  LYS X 235     182.068 138.172 207.858  1.00  0.00           C
ATOM   3791  HA  LYS X 235     183.156 138.158 207.927  1.00  0.00           H
ATOM   3792  CB  LYS X 235     181.701 139.445 206.958  1.00  0.00           C
ATOM   3793  HB2 LYS X 235     180.771 139.116 206.494  1.00  0.00           H
ATOM   3794  HB3 LYS X 235     181.576 140.260 207.670  1.00  0.00           H
ATOM   3795  CG  LYS X 235     182.673 139.885 205.871  1.00  0.00           C
ATOM   3796  HG2 LYS X 235     183.539 140.272 206.407  1.00  0.00           H
ATOM   3797  HG3 LYS X 235     182.833 138.984 205.279  1.00  0.00           H
ATOM   3798  CD  LYS X 235     182.149 140.917 204.873  1.00  0.00           C
ATOM   3799  HD2 LYS X 235     181.195 140.524 204.521  1.00  0.00           H
ATOM   3800  HD3 LYS X 235     181.982 141.830 205.444  1.00  0.00           H
ATOM   3801  CE  LYS X 235     183.036 141.059 203.597  1.00  0.00           C
ATOM   3802  HE2 LYS X 235     184.020 141.314 203.990  1.00  0.00           H
ATOM   3803  HE3 LYS X 235     183.125 140.106 203.077  1.00  0.00           H
ATOM   3804  NZ  LYS X 235     182.584 142.120 202.681  1.00  0.00           N
ATOM   3805  HZ1 LYS X 235     182.243 142.924 203.189  1.00  0.00           H
ATOM   3806  HZ2 LYS X 235     181.813 141.776 202.126  1.00  0.00           H
ATOM   3807  HZ3 LYS X 235     183.390 142.416 202.149  1.00  0.00           H
ATOM   3808  C   LYS X 235     181.568 138.356 209.315  1.00  0.00           C
ATOM   3809  O   LYS X 235     182.366 138.676 210.203  1.00  0.00           O
ATOM   3810  N   ASN X 236     180.244 138.169 209.560  1.00  0.00           N
ATOM   3811  H   ASN X 236     179.675 138.258 208.730  1.00  0.00           H
ATOM   3812  CA  ASN X 236     179.578 138.165 210.815  1.00  0.00           C
ATOM   3813  HA  ASN X 236     179.630 139.195 211.170  1.00  0.00           H
ATOM   3814  CB  ASN X 236     178.099 137.845 210.527  1.00  0.00           C
ATOM   3815  HB2 ASN X 236     177.719 138.767 210.088  1.00  0.00           H
ATOM   3816  HB3 ASN X 236     178.085 136.968 209.880  1.00  0.00           H
ATOM   3817  CG  ASN X 236     177.226 137.434 211.709  1.00  0.00           C
ATOM   3818  OD1 ASN X 236     177.316 136.324 212.214  1.00  0.00           O
ATOM   3819  ND2 ASN X 236     176.410 138.303 212.266  1.00  0.00           N
ATOM   3820 HD21 ASN X 236     176.431 139.304 212.139  1.00  0.00           H
ATOM   3821 HD22 ASN X 236     175.933 137.954 213.086  1.00  0.00           H
ATOM   3822  C   ASN X 236     180.285 137.238 211.861  1.00  0.00           C
ATOM   3823  O   ASN X 236     180.706 137.763 212.923  1.00  0.00           O
ATOM   3824  N   VAL X 237     180.515 135.915 211.629  1.00  0.00           N
ATOM   3825  H   VAL X 237     180.185 135.563 210.742  1.00  0.00           H
ATOM   3826  CA  VAL X 237     181.181 135.021 212.537  1.00  0.00           C
ATOM   3827  HA  VAL X 237     180.703 135.172 213.505  1.00  0.00           H
ATOM   3828  CB  VAL X 237     181.023 133.501 212.066  1.00  0.00           C
ATOM   3829  HB  VAL X 237     179.951 133.311 212.013  1.00  0.00           H
ATOM   3830  CG1 VAL X 237     181.905 133.168 210.865  1.00  0.00           C
ATOM   3831 HG11 VAL X 237     181.558 133.765 210.022  1.00  0.00           H
ATOM   3832 HG12 VAL X 237     182.929 133.424 211.135  1.00  0.00           H
ATOM   3833 HG13 VAL X 237     181.823 132.112 210.609  1.00  0.00           H
ATOM   3834  CG2 VAL X 237     181.373 132.421 213.103  1.00  0.00           C
ATOM   3835 HG21 VAL X 237     181.226 131.428 212.678  1.00  0.00           H
ATOM   3836 HG22 VAL X 237     180.577 132.508 213.843  1.00  0.00           H
ATOM   3837 HG23 VAL X 237     182.388 132.623 213.443  1.00  0.00           H
ATOM   3838  C   VAL X 237     182.635 135.457 212.719  1.00  0.00           C
ATOM   3839  O   VAL X 237     183.166 135.344 213.807  1.00  0.00           O
ATOM   3840  N   ALA X 238     183.340 135.833 211.653  1.00  0.00           N
ATOM   3841  H   ALA X 238     182.988 135.752 210.710  1.00  0.00           H
ATOM   3842  CA  ALA X 238     184.839 136.185 211.687  1.00  0.00           C
ATOM   3843  HA  ALA X 238     185.445 135.395 212.131  1.00  0.00           H
ATOM   3844  CB  ALA X 238     185.333 136.497 210.270  1.00  0.00           C
ATOM   3845  HB1 ALA X 238     184.650 137.155 209.733  1.00  0.00           H
ATOM   3846  HB2 ALA X 238     185.279 135.667 209.565  1.00  0.00           H
ATOM   3847  HB3 ALA X 238     186.363 136.852 210.298  1.00  0.00           H
ATOM   3848  C   ALA X 238     185.021 137.450 212.548  1.00  0.00           C
ATOM   3849  O   ALA X 238     186.032 137.593 213.269  1.00  0.00           O
ATOM   3850  N   PHE X 239     184.005 138.309 212.616  1.00  0.00           N
ATOM   3851  H   PHE X 239     183.171 138.101 212.086  1.00  0.00           H
ATOM   3852  CA  PHE X 239     183.885 139.432 213.488  1.00  0.00           C
ATOM   3853  HA  PHE X 239     184.734 140.067 213.236  1.00  0.00           H
ATOM   3854  CB  PHE X 239     182.689 140.291 213.075  1.00  0.00           C
ATOM   3855  HB2 PHE X 239     182.728 140.350 211.988  1.00  0.00           H
ATOM   3856  HB3 PHE X 239     181.747 139.809 213.339  1.00  0.00           H
ATOM   3857  CG  PHE X 239     182.873 141.712 213.709  1.00  0.00           C
ATOM   3858  CD1 PHE X 239     182.326 142.022 215.029  1.00  0.00           C
ATOM   3859  HD1 PHE X 239     181.844 141.266 215.632  1.00  0.00           H
ATOM   3860  CE1 PHE X 239     182.429 143.362 215.544  1.00  0.00           C
ATOM   3861  HE1 PHE X 239     182.043 143.677 216.502  1.00  0.00           H
ATOM   3862  CZ  PHE X 239     183.248 144.340 214.857  1.00  0.00           C
ATOM   3863  HZ  PHE X 239     183.372 145.304 215.328  1.00  0.00           H
ATOM   3864  CE2 PHE X 239     183.854 144.016 213.676  1.00  0.00           C
ATOM   3865  HE2 PHE X 239     184.553 144.675 213.181  1.00  0.00           H
ATOM   3866  CD2 PHE X 239     183.582 142.756 213.024  1.00  0.00           C
ATOM   3867  HD2 PHE X 239     184.022 142.623 212.047  1.00  0.00           H
ATOM   3868  C   PHE X 239     184.009 138.936 214.904  1.00  0.00           C
ATOM   3869  O   PHE X 239     184.857 139.516 215.615  1.00  0.00           O
ATOM   3870  N   MET X 240     183.163 137.973 215.360  1.00  0.00           N
ATOM   3871  H   MET X 240     182.395 137.748 214.745  1.00  0.00           H
ATOM   3872  CA  MET X 240     183.278 137.391 216.642  1.00  0.00           C
ATOM   3873  HA  MET X 240     183.170 138.194 217.371  1.00  0.00           H
ATOM   3874  CB  MET X 240     182.121 136.368 216.893  1.00  0.00           C
ATOM   3875  HB2 MET X 240     182.419 135.503 216.301  1.00  0.00           H
ATOM   3876  HB3 MET X 240     182.244 135.960 217.896  1.00  0.00           H
ATOM   3877  CG  MET X 240     180.744 137.148 216.753  1.00  0.00           C
ATOM   3878  HG2 MET X 240     180.810 138.034 217.385  1.00  0.00           H
ATOM   3879  HG3 MET X 240     180.640 137.417 215.702  1.00  0.00           H
ATOM   3880  SD  MET X 240     179.268 136.232 217.190  1.00  0.00           S
ATOM   3881  CE  MET X 240     179.545 134.618 216.370  1.00  0.00           C
ATOM   3882  HE1 MET X 240     178.671 134.078 216.736  1.00  0.00           H
ATOM   3883  HE2 MET X 240     179.438 134.602 215.285  1.00  0.00           H
ATOM   3884  HE3 MET X 240     180.397 134.049 216.741  1.00  0.00           H
ATOM   3885  C   MET X 240     184.584 136.625 216.880  1.00  0.00           C
ATOM   3886  O   MET X 240     185.237 136.674 217.959  1.00  0.00           O
ATOM   3887  N   LYS X 241     184.929 135.780 215.931  1.00  0.00           N
ATOM   3888  H   LYS X 241     184.231 135.544 215.240  1.00  0.00           H
ATOM   3889  CA  LYS X 241     186.166 134.936 215.886  1.00  0.00           C
ATOM   3890  HA  LYS X 241     186.101 134.190 216.678  1.00  0.00           H
ATOM   3891  CB  LYS X 241     186.295 134.088 214.575  1.00  0.00           C
ATOM   3892  HB2 LYS X 241     185.281 133.853 214.252  1.00  0.00           H
ATOM   3893  HB3 LYS X 241     186.654 134.817 213.848  1.00  0.00           H
ATOM   3894  CG  LYS X 241     187.159 132.835 214.678  1.00  0.00           C
ATOM   3895  HG2 LYS X 241     188.098 133.094 215.165  1.00  0.00           H
ATOM   3896  HG3 LYS X 241     186.685 132.097 215.325  1.00  0.00           H
ATOM   3897  CD  LYS X 241     187.444 132.237 213.295  1.00  0.00           C
ATOM   3898  HD2 LYS X 241     186.488 131.830 212.963  1.00  0.00           H
ATOM   3899  HD3 LYS X 241     187.797 132.981 212.581  1.00  0.00           H
ATOM   3900  CE  LYS X 241     188.450 131.105 213.409  1.00  0.00           C
ATOM   3901  HE2 LYS X 241     188.398 130.570 214.357  1.00  0.00           H
ATOM   3902  HE3 LYS X 241     188.378 130.403 212.579  1.00  0.00           H
ATOM   3903  NZ  LYS X 241     189.770 131.651 213.356  1.00  0.00           N
ATOM   3904  HZ1 LYS X 241     190.432 130.952 213.052  1.00  0.00           H
ATOM   3905  HZ2 LYS X 241     190.144 132.147 214.153  1.00  0.00           H
ATOM   3906  HZ3 LYS X 241     189.829 132.321 212.603  1.00  0.00           H
ATOM   3907  C   LYS X 241     187.430 135.790 216.260  1.00  0.00           C
ATOM   3908  O   LYS X 241     188.057 135.605 217.301  1.00  0.00           O
ATOM   3909  N   SER X 242     187.610 136.887 215.498  1.00  0.00           N
ATOM   3910  H   SER X 242     186.929 137.039 214.768  1.00  0.00           H
ATOM   3911  CA  SER X 242     188.582 137.929 215.834  1.00  0.00           C
ATOM   3912  HA  SER X 242     189.547 137.469 215.621  1.00  0.00           H
ATOM   3913  CB  SER X 242     188.440 139.083 214.873  1.00  0.00           C
ATOM   3914  HB2 SER X 242     187.424 139.476 214.878  1.00  0.00           H
ATOM   3915  HB3 SER X 242     189.201 139.804 215.171  1.00  0.00           H
ATOM   3916  OG  SER X 242     188.742 138.673 213.526  1.00  0.00           O
ATOM   3917  HG  SER X 242     187.940 138.335 213.121  1.00  0.00           H
ATOM   3918  C   SER X 242     188.597 138.453 217.289  1.00  0.00           C
ATOM   3919  O   SER X 242     189.688 138.545 217.864  1.00  0.00           O
ATOM   3920  N   TYR X 243     187.414 138.822 217.840  1.00  0.00           N
ATOM   3921  H   TYR X 243     186.545 138.776 217.329  1.00  0.00           H
ATOM   3922  CA  TYR X 243     187.277 139.348 219.219  1.00  0.00           C
ATOM   3923  HA  TYR X 243     187.952 140.195 219.343  1.00  0.00           H
ATOM   3924  CB  TYR X 243     185.874 139.864 219.410  1.00  0.00           C
ATOM   3925  HB2 TYR X 243     185.799 140.830 218.912  1.00  0.00           H
ATOM   3926  HB3 TYR X 243     185.199 139.213 218.854  1.00  0.00           H
ATOM   3927  CG  TYR X 243     185.408 140.048 220.788  1.00  0.00           C
ATOM   3928  CD1 TYR X 243     185.576 141.297 221.415  1.00  0.00           C
ATOM   3929  HD1 TYR X 243     186.021 142.077 220.816  1.00  0.00           H
ATOM   3930  CE1 TYR X 243     185.064 141.514 222.721  1.00  0.00           C
ATOM   3931  HE1 TYR X 243     185.044 142.495 223.172  1.00  0.00           H
ATOM   3932  CZ  TYR X 243     184.537 140.362 223.447  1.00  0.00           C
ATOM   3933  OH  TYR X 243     183.959 140.425 224.671  1.00  0.00           O
ATOM   3934  HH  TYR X 243     183.708 141.346 224.772  1.00  0.00           H
ATOM   3935  CE2 TYR X 243     184.592 139.031 222.852  1.00  0.00           C
ATOM   3936  HE2 TYR X 243     184.217 138.201 223.432  1.00  0.00           H
ATOM   3937  CD2 TYR X 243     184.943 138.932 221.506  1.00  0.00           C
ATOM   3938  HD2 TYR X 243     184.849 137.933 221.106  1.00  0.00           H
ATOM   3939  C   TYR X 243     187.685 138.293 220.274  1.00  0.00           C
ATOM   3940  O   TYR X 243     188.392 138.561 221.264  1.00  0.00           O
ATOM   3941  N   ILE X 244     187.166 137.031 220.074  1.00  0.00           N
ATOM   3942  H   ILE X 244     186.522 136.968 219.298  1.00  0.00           H
ATOM   3943  CA  ILE X 244     187.489 135.860 220.855  1.00  0.00           C
ATOM   3944  HA  ILE X 244     187.228 136.030 221.899  1.00  0.00           H
ATOM   3945  CB  ILE X 244     186.637 134.598 220.379  1.00  0.00           C
ATOM   3946  HB  ILE X 244     186.899 134.536 219.323  1.00  0.00           H
ATOM   3947  CG2 ILE X 244     187.187 133.366 221.155  1.00  0.00           C
ATOM   3948 HG21 ILE X 244     187.064 133.592 222.214  1.00  0.00           H
ATOM   3949 HG22 ILE X 244     188.251 133.192 220.997  1.00  0.00           H
ATOM   3950 HG23 ILE X 244     186.627 132.491 220.825  1.00  0.00           H
ATOM   3951  CG1 ILE X 244     185.135 134.923 220.616  1.00  0.00           C
ATOM   3952 HG12 ILE X 244     184.913 134.916 221.683  1.00  0.00           H
ATOM   3953 HG13 ILE X 244     184.822 135.849 220.135  1.00  0.00           H
ATOM   3954  CD1 ILE X 244     184.198 133.903 219.947  1.00  0.00           C
ATOM   3955 HD11 ILE X 244     184.395 133.866 218.875  1.00  0.00           H
ATOM   3956 HD12 ILE X 244     183.161 134.170 220.148  1.00  0.00           H
ATOM   3957 HD13 ILE X 244     184.326 132.877 220.292  1.00  0.00           H
ATOM   3958  C   ILE X 244     189.006 135.650 220.901  1.00  0.00           C
ATOM   3959  O   ILE X 244     189.468 135.533 222.018  1.00  0.00           O
ATOM   3960  N   LEU X 245     189.753 135.642 219.764  1.00  0.00           N
ATOM   3961  H   LEU X 245     189.351 135.619 218.838  1.00  0.00           H
ATOM   3962  CA  LEU X 245     191.234 135.497 219.950  1.00  0.00           C
ATOM   3963  HA  LEU X 245     191.470 134.515 220.359  1.00  0.00           H
ATOM   3964  CB  LEU X 245     191.896 135.592 218.553  1.00  0.00           C
ATOM   3965  HB2 LEU X 245     191.417 134.844 217.921  1.00  0.00           H
ATOM   3966  HB3 LEU X 245     191.529 136.544 218.171  1.00  0.00           H
ATOM   3967  CG  LEU X 245     193.437 135.560 218.541  1.00  0.00           C
ATOM   3968  HG  LEU X 245     193.762 136.508 218.969  1.00  0.00           H
ATOM   3969  CD1 LEU X 245     193.961 134.272 219.175  1.00  0.00           C
ATOM   3970 HD11 LEU X 245     193.480 133.349 218.851  1.00  0.00           H
ATOM   3971 HD12 LEU X 245     193.832 134.274 220.258  1.00  0.00           H
ATOM   3972 HD13 LEU X 245     194.999 134.160 218.863  1.00  0.00           H
ATOM   3973  CD2 LEU X 245     193.833 135.693 217.057  1.00  0.00           C
ATOM   3974 HD21 LEU X 245     193.383 134.902 216.458  1.00  0.00           H
ATOM   3975 HD22 LEU X 245     193.502 136.620 216.588  1.00  0.00           H
ATOM   3976 HD23 LEU X 245     194.914 135.558 217.081  1.00  0.00           H
ATOM   3977  C   LEU X 245     191.858 136.607 220.865  1.00  0.00           C
ATOM   3978  O   LEU X 245     192.781 136.388 221.628  1.00  0.00           O
ATOM   3979  N   GLU X 246     191.360 137.837 220.764  1.00  0.00           N
ATOM   3980  H   GLU X 246     190.785 138.042 219.960  1.00  0.00           H
ATOM   3981  CA  GLU X 246     191.863 139.000 221.543  1.00  0.00           C
ATOM   3982  HA  GLU X 246     192.950 139.055 221.603  1.00  0.00           H
ATOM   3983  CB  GLU X 246     191.250 140.350 221.117  1.00  0.00           C
ATOM   3984  HB2 GLU X 246     190.170 140.204 221.102  1.00  0.00           H
ATOM   3985  HB3 GLU X 246     191.524 141.092 221.867  1.00  0.00           H
ATOM   3986  CG  GLU X 246     191.778 140.726 219.695  1.00  0.00           C
ATOM   3987  HG2 GLU X 246     191.323 140.093 218.933  1.00  0.00           H
ATOM   3988  HG3 GLU X 246     191.493 141.773 219.596  1.00  0.00           H
ATOM   3989  CD  GLU X 246     193.289 140.579 219.511  1.00  0.00           C
ATOM   3990  OE1 GLU X 246     194.049 140.907 220.458  1.00  0.00           O
ATOM   3991  OE2 GLU X 246     193.733 140.097 218.441  1.00  0.00           O
ATOM   3992  C   GLU X 246     191.421 138.956 223.046  1.00  0.00           C
ATOM   3993  O   GLU X 246     192.163 139.431 223.870  1.00  0.00           O
ATOM   3994  N   LYS X 247     190.372 138.272 223.445  1.00  0.00           N
ATOM   3995  H   LYS X 247     189.926 137.705 222.738  1.00  0.00           H
ATOM   3996  CA  LYS X 247     189.899 138.133 224.834  1.00  0.00           C
ATOM   3997  HA  LYS X 247     190.236 138.995 225.411  1.00  0.00           H
ATOM   3998  CB  LYS X 247     188.343 138.162 224.778  1.00  0.00           C
ATOM   3999  HB2 LYS X 247     187.981 137.850 223.798  1.00  0.00           H
ATOM   4000  HB3 LYS X 247     187.986 137.405 225.476  1.00  0.00           H
ATOM   4001  CG  LYS X 247     187.844 139.561 225.236  1.00  0.00           C
ATOM   4002  HG2 LYS X 247     186.756 139.526 225.285  1.00  0.00           H
ATOM   4003  HG3 LYS X 247     188.267 139.918 226.175  1.00  0.00           H
ATOM   4004  CD  LYS X 247     188.100 140.678 224.197  1.00  0.00           C
ATOM   4005  HD2 LYS X 247     189.114 140.690 223.795  1.00  0.00           H
ATOM   4006  HD3 LYS X 247     187.420 140.424 223.384  1.00  0.00           H
ATOM   4007  CE  LYS X 247     187.715 142.118 224.671  1.00  0.00           C
ATOM   4008  HE2 LYS X 247     187.278 142.651 223.827  1.00  0.00           H
ATOM   4009  HE3 LYS X 247     186.877 142.015 225.360  1.00  0.00           H
ATOM   4010  NZ  LYS X 247     188.960 142.867 225.212  1.00  0.00           N
ATOM   4011  HZ1 LYS X 247     189.689 142.920 224.515  1.00  0.00           H
ATOM   4012  HZ2 LYS X 247     189.280 142.494 226.095  1.00  0.00           H
ATOM   4013  HZ3 LYS X 247     188.798 143.822 225.497  1.00  0.00           H
ATOM   4014  C   LYS X 247     190.458 136.903 225.457  1.00  0.00           C
ATOM   4015  O   LYS X 247     190.567 136.808 226.696  1.00  0.00           O
ATOM   4016  N   VAL X 248     190.698 135.835 224.694  1.00  0.00           N
ATOM   4017  H   VAL X 248     190.429 135.851 223.720  1.00  0.00           H
ATOM   4018  CA  VAL X 248     191.603 134.739 225.098  1.00  0.00           C
ATOM   4019  HA  VAL X 248     191.253 134.190 225.972  1.00  0.00           H
ATOM   4020  CB  VAL X 248     191.658 133.657 223.972  1.00  0.00           C
ATOM   4021  HB  VAL X 248     191.951 134.186 223.066  1.00  0.00           H
ATOM   4022  CG1 VAL X 248     192.681 132.590 224.008  1.00  0.00           C
ATOM   4023 HG11 VAL X 248     192.839 132.077 223.059  1.00  0.00           H
ATOM   4024 HG12 VAL X 248     193.631 132.905 224.438  1.00  0.00           H
ATOM   4025 HG13 VAL X 248     192.296 131.812 224.668  1.00  0.00           H
ATOM   4026  CG2 VAL X 248     190.269 132.997 223.941  1.00  0.00           C
ATOM   4027 HG21 VAL X 248     190.124 132.271 223.141  1.00  0.00           H
ATOM   4028 HG22 VAL X 248     189.544 133.793 223.770  1.00  0.00           H
ATOM   4029 HG23 VAL X 248     190.086 132.487 224.887  1.00  0.00           H
ATOM   4030  C   VAL X 248     193.051 135.203 225.352  1.00  0.00           C
ATOM   4031  O   VAL X 248     193.572 135.053 226.463  1.00  0.00           O
ATOM   4032  N   LYS X 249     193.638 135.982 224.413  1.00  0.00           N
ATOM   4033  H   LYS X 249     193.142 136.119 223.544  1.00  0.00           H
ATOM   4034  CA  LYS X 249     194.894 136.763 224.617  1.00  0.00           C
ATOM   4035  HA  LYS X 249     195.751 136.096 224.716  1.00  0.00           H
ATOM   4036  CB  LYS X 249     195.176 137.488 223.272  1.00  0.00           C
ATOM   4037  HB2 LYS X 249     195.280 136.714 222.512  1.00  0.00           H
ATOM   4038  HB3 LYS X 249     194.319 138.111 223.014  1.00  0.00           H
ATOM   4039  CG  LYS X 249     196.538 138.186 223.081  1.00  0.00           C
ATOM   4040  HG2 LYS X 249     196.845 138.785 223.938  1.00  0.00           H
ATOM   4041  HG3 LYS X 249     197.214 137.332 223.045  1.00  0.00           H
ATOM   4042  CD  LYS X 249     196.512 139.148 221.872  1.00  0.00           C
ATOM   4043  HD2 LYS X 249     195.973 140.063 222.114  1.00  0.00           H
ATOM   4044  HD3 LYS X 249     197.549 139.456 221.739  1.00  0.00           H
ATOM   4045  CE  LYS X 249     196.036 138.451 220.553  1.00  0.00           C
ATOM   4046  HE2 LYS X 249     196.460 137.447 220.516  1.00  0.00           H
ATOM   4047  HE3 LYS X 249     194.950 138.375 220.600  1.00  0.00           H
ATOM   4048  NZ  LYS X 249     196.500 139.321 219.445  1.00  0.00           N
ATOM   4049  HZ1 LYS X 249     197.460 139.622 219.542  1.00  0.00           H
ATOM   4050  HZ2 LYS X 249     195.823 140.056 219.303  1.00  0.00           H
ATOM   4051  HZ3 LYS X 249     196.444 138.837 218.560  1.00  0.00           H
ATOM   4052  C   LYS X 249     194.864 137.662 225.889  1.00  0.00           C
ATOM   4053  O   LYS X 249     195.802 137.662 226.653  1.00  0.00           O
ATOM   4054  N   GLU X 250     193.781 138.442 226.125  1.00  0.00           N
ATOM   4055  H   GLU X 250     193.111 138.557 225.378  1.00  0.00           H
ATOM   4056  CA  GLU X 250     193.517 139.186 227.405  1.00  0.00           C
ATOM   4057  HA  GLU X 250     194.353 139.885 227.442  1.00  0.00           H
ATOM   4058  CB  GLU X 250     192.198 140.025 227.338  1.00  0.00           C
ATOM   4059  HB2 GLU X 250     192.216 140.473 226.344  1.00  0.00           H
ATOM   4060  HB3 GLU X 250     191.334 139.374 227.467  1.00  0.00           H
ATOM   4061  CG  GLU X 250     192.101 141.109 228.400  1.00  0.00           C
ATOM   4062  HG2 GLU X 250     192.340 140.724 229.391  1.00  0.00           H
ATOM   4063  HG3 GLU X 250     192.809 141.867 228.063  1.00  0.00           H
ATOM   4064  CD  GLU X 250     190.773 141.736 228.451  1.00  0.00           C
ATOM   4065  OE1 GLU X 250     189.961 141.637 227.511  1.00  0.00           O
ATOM   4066  OE2 GLU X 250     190.501 142.406 229.448  1.00  0.00           O
ATOM   4067  C   GLU X 250     193.480 138.256 228.670  1.00  0.00           C
ATOM   4068  O   GLU X 250     194.098 138.544 229.724  1.00  0.00           O
ATOM   4069  N   HIP X 251     192.834 137.091 228.571  1.00  0.00           N
ATOM   4070  H   HIP X 251     192.163 136.839 227.859  1.00  0.00           H
ATOM   4071  CA  HIP X 251     192.648 136.197 229.726  1.00  0.00           C
ATOM   4072  HA  HIP X 251     192.369 136.815 230.579  1.00  0.00           H
ATOM   4073  CB  HIP X 251     191.451 135.272 229.369  1.00  0.00           C
ATOM   4074  HB2 HIP X 251     190.603 135.893 229.080  1.00  0.00           H
ATOM   4075  HB3 HIP X 251     191.713 134.646 228.516  1.00  0.00           H
ATOM   4076  CG  HIP X 251     191.023 134.431 230.522  1.00  0.00           C
ATOM   4077  ND1 HIP X 251     190.163 134.904 231.526  1.00  0.00           N
ATOM   4078  HD1 HIP X 251     189.811 135.849 231.580  1.00  0.00           H
ATOM   4079  CE1 HIP X 251     189.968 133.944 232.462  1.00  0.00           C
ATOM   4080  HE1 HIP X 251     189.529 134.044 233.444  1.00  0.00           H
ATOM   4081  NE2 HIP X 251     190.507 132.805 231.964  1.00  0.00           N
ATOM   4082  HE2 HIP X 251     190.563 131.942 232.484  1.00  0.00           H
ATOM   4083  CD2 HIP X 251     191.231 133.116 230.849  1.00  0.00           C
ATOM   4084  HD2 HIP X 251     191.799 132.425 230.243  1.00  0.00           H
ATOM   4085  C   HIP X 251     193.879 135.365 230.103  1.00  0.00           C
ATOM   4086  O   HIP X 251     193.959 134.837 231.229  1.00  0.00           O
ATOM   4087  N   GLN X 252     194.811 135.173 229.163  1.00  0.00           N
ATOM   4088  H   GLN X 252     194.484 135.336 228.221  1.00  0.00           H
ATOM   4089  CA  GLN X 252     196.054 134.397 229.402  1.00  0.00           C
ATOM   4090  HA  GLN X 252     195.700 133.487 229.888  1.00  0.00           H
ATOM   4091  CB  GLN X 252     196.761 134.018 228.004  1.00  0.00           C
ATOM   4092  HB2 GLN X 252     196.769 134.891 227.351  1.00  0.00           H
ATOM   4093  HB3 GLN X 252     197.811 133.788 228.181  1.00  0.00           H
ATOM   4094  CG  GLN X 252     196.177 132.746 227.325  1.00  0.00           C
ATOM   4095  HG2 GLN X 252     196.133 131.853 227.949  1.00  0.00           H
ATOM   4096  HG3 GLN X 252     195.196 132.994 226.922  1.00  0.00           H
ATOM   4097  CD  GLN X 252     197.080 132.407 226.165  1.00  0.00           C
ATOM   4098  OE1 GLN X 252     196.652 132.485 224.968  1.00  0.00           O
ATOM   4099  NE2 GLN X 252     198.310 132.057 226.405  1.00  0.00           N
ATOM   4100 HE21 GLN X 252     198.807 131.915 225.537  1.00  0.00           H
ATOM   4101 HE22 GLN X 252     198.749 132.161 227.308  1.00  0.00           H
ATOM   4102  C   GLN X 252     197.045 135.091 230.410  1.00  0.00           C
ATOM   4103  O   GLN X 252     197.947 134.434 230.923  1.00  0.00           O
ATOM   4104  N   GLU X 253     196.787 136.348 230.726  1.00  0.00           N
ATOM   4105  H   GLU X 253     196.193 136.848 230.081  1.00  0.00           H
ATOM   4106  CA  GLU X 253     197.457 137.107 231.826  1.00  0.00           C
ATOM   4107  HA  GLU X 253     198.507 136.822 231.892  1.00  0.00           H
ATOM   4108  CB  GLU X 253     197.577 138.520 231.372  1.00  0.00           C
ATOM   4109  HB2 GLU X 253     196.654 139.061 231.582  1.00  0.00           H
ATOM   4110  HB3 GLU X 253     198.408 139.008 231.883  1.00  0.00           H
ATOM   4111  CG  GLU X 253     197.873 138.876 229.896  1.00  0.00           C
ATOM   4112  HG2 GLU X 253     198.765 138.302 229.646  1.00  0.00           H
ATOM   4113  HG3 GLU X 253     196.968 138.617 229.347  1.00  0.00           H
ATOM   4114  CD  GLU X 253     198.138 140.407 229.732  1.00  0.00           C
ATOM   4115  OE1 GLU X 253     198.597 141.094 230.681  1.00  0.00           O
ATOM   4116  OE2 GLU X 253     198.023 140.922 228.548  1.00  0.00           O
ATOM   4117  C   GLU X 253     196.791 136.875 233.208  1.00  0.00           C
ATOM   4118  O   GLU X 253     197.164 137.601 234.152  1.00  0.00           O
ATOM   4119  N   SER X 254     195.679 136.086 233.319  1.00  0.00           N
ATOM   4120  H   SER X 254     195.379 135.522 232.537  1.00  0.00           H
ATOM   4121  CA  SER X 254     194.907 136.032 234.620  1.00  0.00           C
ATOM   4122  HA  SER X 254     195.508 136.335 235.478  1.00  0.00           H
ATOM   4123  CB  SER X 254     193.665 136.995 234.534  1.00  0.00           C
ATOM   4124  HB2 SER X 254     194.031 138.019 234.617  1.00  0.00           H
ATOM   4125  HB3 SER X 254     193.277 136.802 233.534  1.00  0.00           H
ATOM   4126  OG  SER X 254     192.693 136.901 235.530  1.00  0.00           O
ATOM   4127  HG  SER X 254     192.289 136.030 235.575  1.00  0.00           H
ATOM   4128  C   SER X 254     194.417 134.571 234.904  1.00  0.00           C
ATOM   4129  O   SER X 254     193.964 134.214 236.026  1.00  0.00           O
ATOM   4130  N   MET X 255     194.498 133.653 233.929  1.00  0.00           N
ATOM   4131  H   MET X 255     194.732 133.981 233.003  1.00  0.00           H
ATOM   4132  CA  MET X 255     194.370 132.184 234.179  1.00  0.00           C
ATOM   4133  HA  MET X 255     193.456 132.111 234.768  1.00  0.00           H
ATOM   4134  CB  MET X 255     194.084 131.410 232.921  1.00  0.00           C
ATOM   4135  HB2 MET X 255     194.196 130.396 233.304  1.00  0.00           H
ATOM   4136  HB3 MET X 255     193.066 131.648 232.612  1.00  0.00           H
ATOM   4137  CG  MET X 255     195.080 131.577 231.786  1.00  0.00           C
ATOM   4138  HG2 MET X 255     194.901 132.587 231.416  1.00  0.00           H
ATOM   4139  HG3 MET X 255     196.096 131.587 232.182  1.00  0.00           H
ATOM   4140  SD  MET X 255     194.957 130.247 230.552  1.00  0.00           S
ATOM   4141  CE  MET X 255     196.712 129.860 230.318  1.00  0.00           C
ATOM   4142  HE1 MET X 255     197.347 130.718 230.097  1.00  0.00           H
ATOM   4143  HE2 MET X 255     197.082 129.272 231.158  1.00  0.00           H
ATOM   4144  HE3 MET X 255     196.667 129.164 229.480  1.00  0.00           H
ATOM   4145  C   MET X 255     195.590 131.685 234.949  1.00  0.00           C
ATOM   4146  O   MET X 255     196.706 132.147 234.781  1.00  0.00           O
ATOM   4147  N   ASP X 256     195.329 130.733 235.827  1.00  0.00           N
ATOM   4148  H   ASP X 256     194.374 130.458 236.007  1.00  0.00           H
ATOM   4149  CA  ASP X 256     196.287 129.703 236.292  1.00  0.00           C
ATOM   4150  HA  ASP X 256     197.258 129.886 235.833  1.00  0.00           H
ATOM   4151  CB  ASP X 256     196.474 129.696 237.838  1.00  0.00           C
ATOM   4152  HB2 ASP X 256     197.055 130.609 237.966  1.00  0.00           H
ATOM   4153  HB3 ASP X 256     195.443 129.855 238.155  1.00  0.00           H
ATOM   4154  CG  ASP X 256     197.194 128.478 238.521  1.00  0.00           C
ATOM   4155  OD1 ASP X 256     197.291 128.488 239.757  1.00  0.00           O
ATOM   4156  OD2 ASP X 256     197.641 127.474 237.899  1.00  0.00           O
ATOM   4157  C   ASP X 256     195.932 128.326 235.661  1.00  0.00           C
ATOM   4158  O   ASP X 256     194.751 128.001 235.887  1.00  0.00           O
ATOM   4159  N   MET X 257     196.813 127.585 235.011  1.00  0.00           N
ATOM   4160  H   MET X 257     197.769 127.880 235.151  1.00  0.00           H
ATOM   4161  CA  MET X 257     196.634 126.341 234.231  1.00  0.00           C
ATOM   4162  HA  MET X 257     195.749 126.404 233.598  1.00  0.00           H
ATOM   4163  CB  MET X 257     197.859 126.128 233.292  1.00  0.00           C
ATOM   4164  HB2 MET X 257     198.314 127.076 233.006  1.00  0.00           H
ATOM   4165  HB3 MET X 257     198.652 125.618 233.839  1.00  0.00           H
ATOM   4166  CG  MET X 257     197.400 125.517 231.965  1.00  0.00           C
ATOM   4167  HG2 MET X 257     196.798 124.617 232.090  1.00  0.00           H
ATOM   4168  HG3 MET X 257     196.729 126.282 231.572  1.00  0.00           H
ATOM   4169  SD  MET X 257     198.629 125.085 230.656  1.00  0.00           S
ATOM   4170  CE  MET X 257     199.261 126.724 230.211  1.00  0.00           C
ATOM   4171  HE1 MET X 257     199.999 126.780 229.411  1.00  0.00           H
ATOM   4172  HE2 MET X 257     198.444 127.333 229.823  1.00  0.00           H
ATOM   4173  HE3 MET X 257     199.526 127.208 231.151  1.00  0.00           H
ATOM   4174  C   MET X 257     196.525 125.065 235.109  1.00  0.00           C
ATOM   4175  O   MET X 257     196.018 124.073 234.692  1.00  0.00           O
ATOM   4176  N   ASN X 258     196.972 125.106 236.322  1.00  0.00           N
ATOM   4177  H   ASN X 258     197.163 126.028 236.689  1.00  0.00           H
ATOM   4178  CA  ASN X 258     196.803 124.025 237.380  1.00  0.00           C
ATOM   4179  HA  ASN X 258     196.865 123.060 236.877  1.00  0.00           H
ATOM   4180  CB  ASN X 258     197.926 124.209 238.349  1.00  0.00           C
ATOM   4181  HB2 ASN X 258     197.879 125.091 238.988  1.00  0.00           H
ATOM   4182  HB3 ASN X 258     197.822 123.365 239.031  1.00  0.00           H
ATOM   4183  CG  ASN X 258     199.391 124.080 237.788  1.00  0.00           C
ATOM   4184  OD1 ASN X 258     199.957 122.998 237.595  1.00  0.00           O
ATOM   4185  ND2 ASN X 258     199.909 125.218 237.468  1.00  0.00           N
ATOM   4186 HD21 ASN X 258     199.341 126.048 237.564  1.00  0.00           H
ATOM   4187 HD22 ASN X 258     200.583 125.192 236.717  1.00  0.00           H
ATOM   4188  C   ASN X 258     195.484 124.194 238.151  1.00  0.00           C
ATOM   4189  O   ASN X 258     194.922 123.220 238.676  1.00  0.00           O
ATOM   4190  N   ASN X 259     194.991 125.403 238.212  1.00  0.00           N
ATOM   4191  H   ASN X 259     195.643 126.140 237.985  1.00  0.00           H
ATOM   4192  CA  ASN X 259     193.706 125.774 238.781  1.00  0.00           C
ATOM   4193  HA  ASN X 259     193.107 124.950 239.169  1.00  0.00           H
ATOM   4194  CB  ASN X 259     193.926 126.797 239.886  1.00  0.00           C
ATOM   4195  HB2 ASN X 259     194.456 127.689 239.553  1.00  0.00           H
ATOM   4196  HB3 ASN X 259     192.973 126.932 240.397  1.00  0.00           H
ATOM   4197  CG  ASN X 259     194.810 126.243 240.962  1.00  0.00           C
ATOM   4198  OD1 ASN X 259     194.529 125.130 241.413  1.00  0.00           O
ATOM   4199  ND2 ASN X 259     195.792 126.932 241.536  1.00  0.00           N
ATOM   4200 HD21 ASN X 259     196.173 127.737 241.059  1.00  0.00           H
ATOM   4201 HD22 ASN X 259     196.357 126.517 242.264  1.00  0.00           H
ATOM   4202  C   ASN X 259     192.778 126.385 237.660  1.00  0.00           C
ATOM   4203  O   ASN X 259     192.564 127.598 237.689  1.00  0.00           O
ATOM   4204  N   PRO X 260     192.187 125.612 236.696  1.00  0.00           N
ATOM   4205  CD  PRO X 260     192.470 124.233 236.339  1.00  0.00           C
ATOM   4206  HD2 PRO X 260     192.450 123.444 237.091  1.00  0.00           H
ATOM   4207  HD3 PRO X 260     193.500 124.124 235.998  1.00  0.00           H
ATOM   4208  CG  PRO X 260     191.491 123.726 235.253  1.00  0.00           C
ATOM   4209  HG2 PRO X 260     190.476 123.430 235.520  1.00  0.00           H
ATOM   4210  HG3 PRO X 260     191.892 122.954 234.597  1.00  0.00           H
ATOM   4211  CB  PRO X 260     191.291 125.136 234.539  1.00  0.00           C
ATOM   4212  HB2 PRO X 260     190.435 125.204 233.867  1.00  0.00           H
ATOM   4213  HB3 PRO X 260     192.128 125.377 233.884  1.00  0.00           H
ATOM   4214  CA  PRO X 260     191.246 126.144 235.664  1.00  0.00           C
ATOM   4215  HA  PRO X 260     191.680 127.052 235.244  1.00  0.00           H
ATOM   4216  C   PRO X 260     189.790 126.517 236.154  1.00  0.00           C
ATOM   4217  O   PRO X 260     189.086 125.725 236.867  1.00  0.00           O
ATOM   4218  N   GLN X 261     189.344 127.752 235.878  1.00  0.00           N
ATOM   4219  H   GLN X 261     189.971 128.310 235.316  1.00  0.00           H
ATOM   4220  CA  GLN X 261     188.049 128.323 236.313  1.00  0.00           C
ATOM   4221  HA  GLN X 261     187.523 127.623 236.961  1.00  0.00           H
ATOM   4222  CB  GLN X 261     188.212 129.712 236.982  1.00  0.00           C
ATOM   4223  HB2 GLN X 261     188.248 130.351 236.100  1.00  0.00           H
ATOM   4224  HB3 GLN X 261     187.334 130.039 237.538  1.00  0.00           H
ATOM   4225  CG  GLN X 261     189.417 129.897 237.852  1.00  0.00           C
ATOM   4226  HG2 GLN X 261     190.371 129.750 237.345  1.00  0.00           H
ATOM   4227  HG3 GLN X 261     189.558 130.933 238.159  1.00  0.00           H
ATOM   4228  CD  GLN X 261     189.464 129.047 239.146  1.00  0.00           C
ATOM   4229  OE1 GLN X 261     188.457 128.656 239.688  1.00  0.00           O
ATOM   4230  NE2 GLN X 261     190.673 128.846 239.656  1.00  0.00           N
ATOM   4231 HE21 GLN X 261     190.714 128.038 240.261  1.00  0.00           H
ATOM   4232 HE22 GLN X 261     191.513 129.031 239.127  1.00  0.00           H
ATOM   4233  C   GLN X 261     187.114 128.502 235.147  1.00  0.00           C
ATOM   4234  O   GLN X 261     186.042 129.078 235.310  1.00  0.00           O
ATOM   4235  N   ASH X 262     187.431 128.129 233.870  1.00  0.00           N
ATOM   4236  H   ASH X 262     188.335 127.684 233.800  1.00  0.00           H
ATOM   4237  CA  ASH X 262     186.590 128.183 232.663  1.00  0.00           C
ATOM   4238  HA  ASH X 262     185.618 127.740 232.880  1.00  0.00           H
ATOM   4239  CB  ASH X 262     186.412 129.666 232.295  1.00  0.00           C
ATOM   4240  HB2 ASH X 262     185.849 129.721 231.363  1.00  0.00           H
ATOM   4241  HB3 ASH X 262     185.856 130.149 233.097  1.00  0.00           H
ATOM   4242  CG  ASH X 262     187.798 130.347 232.262  1.00  0.00           C
ATOM   4243  OD1 ASH X 262     188.334 130.955 233.219  1.00  0.00           O
ATOM   4244  OD2 ASH X 262     188.493 130.149 231.132  1.00  0.00           O
ATOM   4245  HD2 ASH X 262     189.373 130.483 231.324  1.00  0.00           H
ATOM   4246  C   ASH X 262     187.047 127.370 231.444  1.00  0.00           C
ATOM   4247  O   ASH X 262     188.149 126.819 231.448  1.00  0.00           O
ATOM   4248  N   PHE X 263     186.246 127.353 230.378  1.00  0.00           N
ATOM   4249  H   PHE X 263     185.382 127.872 230.447  1.00  0.00           H
ATOM   4250  CA  PHE X 263     186.486 126.630 229.092  1.00  0.00           C
ATOM   4251  HA  PHE X 263     186.442 125.549 229.227  1.00  0.00           H
ATOM   4252  CB  PHE X 263     185.306 127.005 228.202  1.00  0.00           C
ATOM   4253  HB2 PHE X 263     184.375 126.809 228.733  1.00  0.00           H
ATOM   4254  HB3 PHE X 263     185.341 128.041 227.863  1.00  0.00           H
ATOM   4255  CG  PHE X 263     185.075 126.139 227.014  1.00  0.00           C
ATOM   4256  CD1 PHE X 263     185.873 126.350 225.822  1.00  0.00           C
ATOM   4257  HD1 PHE X 263     186.645 127.104 225.853  1.00  0.00           H
ATOM   4258  CE1 PHE X 263     185.747 125.545 224.748  1.00  0.00           C
ATOM   4259  HE1 PHE X 263     186.461 125.609 223.939  1.00  0.00           H
ATOM   4260  CZ  PHE X 263     184.788 124.470 224.716  1.00  0.00           C
ATOM   4261  HZ  PHE X 263     184.623 123.814 223.875  1.00  0.00           H
ATOM   4262  CE2 PHE X 263     184.012 124.296 225.876  1.00  0.00           C
ATOM   4263  HE2 PHE X 263     183.275 123.507 225.887  1.00  0.00           H
ATOM   4264  CD2 PHE X 263     184.147 125.099 227.018  1.00  0.00           C
ATOM   4265  HD2 PHE X 263     183.496 125.010 227.875  1.00  0.00           H
ATOM   4266  C   PHE X 263     187.756 126.919 228.398  1.00  0.00           C
ATOM   4267  O   PHE X 263     188.393 126.059 227.794  1.00  0.00           O
ATOM   4268  N   ILE X 264     188.099 128.220 228.455  1.00  0.00           N
ATOM   4269  H   ILE X 264     187.548 128.832 229.041  1.00  0.00           H
ATOM   4270  CA  ILE X 264     189.370 128.836 227.905  1.00  0.00           C
ATOM   4271  HA  ILE X 264     189.486 128.523 226.867  1.00  0.00           H
ATOM   4272  CB  ILE X 264     189.434 130.402 227.863  1.00  0.00           C
ATOM   4273  HB  ILE X 264     189.049 130.791 228.806  1.00  0.00           H
ATOM   4274  CG2 ILE X 264     190.914 130.760 227.446  1.00  0.00           C
ATOM   4275 HG21 ILE X 264     191.014 131.845 227.443  1.00  0.00           H
ATOM   4276 HG22 ILE X 264     191.176 130.306 226.490  1.00  0.00           H
ATOM   4277 HG23 ILE X 264     191.602 130.332 228.175  1.00  0.00           H
ATOM   4278  CG1 ILE X 264     188.508 130.883 226.763  1.00  0.00           C
ATOM   4279 HG12 ILE X 264     189.029 130.761 225.813  1.00  0.00           H
ATOM   4280 HG13 ILE X 264     187.591 130.294 226.744  1.00  0.00           H
ATOM   4281  CD1 ILE X 264     188.153 132.350 226.969  1.00  0.00           C
ATOM   4282 HD11 ILE X 264     188.966 132.973 227.343  1.00  0.00           H
ATOM   4283 HD12 ILE X 264     187.219 132.390 227.530  1.00  0.00           H
ATOM   4284 HD13 ILE X 264     187.960 132.803 225.996  1.00  0.00           H
ATOM   4285  C   ILE X 264     190.519 128.221 228.688  1.00  0.00           C
ATOM   4286  O   ILE X 264     191.430 127.630 228.041  1.00  0.00           O
ATOM   4287  N   ASP X 265     190.549 128.284 230.010  1.00  0.00           N
ATOM   4288  H   ASP X 265     189.843 128.749 230.563  1.00  0.00           H
ATOM   4289  CA  ASP X 265     191.572 127.639 230.822  1.00  0.00           C
ATOM   4290  HA  ASP X 265     192.517 128.088 230.517  1.00  0.00           H
ATOM   4291  CB  ASP X 265     191.424 127.846 232.301  1.00  0.00           C
ATOM   4292  HB2 ASP X 265     190.632 127.268 232.776  1.00  0.00           H
ATOM   4293  HB3 ASP X 265     192.333 127.447 232.751  1.00  0.00           H
ATOM   4294  CG  ASP X 265     191.253 129.318 232.842  1.00  0.00           C
ATOM   4295  OD1 ASP X 265     191.187 129.412 234.100  1.00  0.00           O
ATOM   4296  OD2 ASP X 265     191.017 130.175 231.992  1.00  0.00           O
ATOM   4297  C   ASP X 265     191.781 126.164 230.726  1.00  0.00           C
ATOM   4298  O   ASP X 265     192.907 125.673 230.595  1.00  0.00           O
ATOM   4299  N   CYS X 266     190.640 125.485 230.598  1.00  0.00           N
ATOM   4300  H   CYS X 266     189.780 126.005 230.690  1.00  0.00           H
ATOM   4301  CA  CYS X 266     190.591 124.082 230.393  1.00  0.00           C
ATOM   4302  HA  CYS X 266     191.124 123.572 231.196  1.00  0.00           H
ATOM   4303  CB  CYS X 266     189.066 123.784 230.504  1.00  0.00           C
ATOM   4304  HB2 CYS X 266     188.694 124.372 231.343  1.00  0.00           H
ATOM   4305  HB3 CYS X 266     188.512 124.085 229.615  1.00  0.00           H
ATOM   4306  SG  CYS X 266     188.913 122.000 230.791  1.00  0.00           S
ATOM   4307  HG  CYS X 266     188.320 121.832 229.606  1.00  0.00           H
ATOM   4308  C   CYS X 266     191.178 123.692 228.987  1.00  0.00           C
ATOM   4309  O   CYS X 266     191.740 122.605 228.977  1.00  0.00           O
ATOM   4310  N   PHE X 267     190.926 124.531 227.987  1.00  0.00           N
ATOM   4311  H   PHE X 267     190.229 125.250 228.121  1.00  0.00           H
ATOM   4312  CA  PHE X 267     191.372 124.222 226.613  1.00  0.00           C
ATOM   4313  HA  PHE X 267     191.168 123.173 226.398  1.00  0.00           H
ATOM   4314  CB  PHE X 267     190.699 125.065 225.597  1.00  0.00           C
ATOM   4315  HB2 PHE X 267     189.635 125.118 225.828  1.00  0.00           H
ATOM   4316  HB3 PHE X 267     191.122 126.068 225.657  1.00  0.00           H
ATOM   4317  CG  PHE X 267     190.726 124.442 224.249  1.00  0.00           C
ATOM   4318  CD1 PHE X 267     191.846 124.716 223.460  1.00  0.00           C
ATOM   4319  HD1 PHE X 267     192.666 125.288 223.869  1.00  0.00           H
ATOM   4320  CE1 PHE X 267     191.999 124.147 222.202  1.00  0.00           C
ATOM   4321  HE1 PHE X 267     192.885 124.344 221.615  1.00  0.00           H
ATOM   4322  CZ  PHE X 267     190.965 123.352 221.626  1.00  0.00           C
ATOM   4323  HZ  PHE X 267     190.979 123.038 220.592  1.00  0.00           H
ATOM   4324  CE2 PHE X 267     189.812 123.198 222.410  1.00  0.00           C
ATOM   4325  HE2 PHE X 267     189.003 122.603 222.010  1.00  0.00           H
ATOM   4326  CD2 PHE X 267     189.654 123.783 223.689  1.00  0.00           C
ATOM   4327  HD2 PHE X 267     188.744 123.654 224.256  1.00  0.00           H
ATOM   4328  C   PHE X 267     192.838 124.397 226.596  1.00  0.00           C
ATOM   4329  O   PHE X 267     193.524 123.568 226.026  1.00  0.00           O
ATOM   4330  N   LEU X 268     193.347 125.520 227.095  1.00  0.00           N
ATOM   4331  H   LEU X 268     192.692 126.141 227.548  1.00  0.00           H
ATOM   4332  CA  LEU X 268     194.741 125.833 227.142  1.00  0.00           C
ATOM   4333  HA  LEU X 268     195.165 125.750 226.142  1.00  0.00           H
ATOM   4334  CB  LEU X 268     194.832 127.250 227.584  1.00  0.00           C
ATOM   4335  HB2 LEU X 268     194.170 127.468 228.422  1.00  0.00           H
ATOM   4336  HB3 LEU X 268     195.839 127.393 227.974  1.00  0.00           H
ATOM   4337  CG  LEU X 268     194.616 128.324 226.506  1.00  0.00           C
ATOM   4338  HG  LEU X 268     193.615 128.279 226.077  1.00  0.00           H
ATOM   4339  CD1 LEU X 268     194.633 129.739 227.099  1.00  0.00           C
ATOM   4340 HD11 LEU X 268     195.592 129.876 227.600  1.00  0.00           H
ATOM   4341 HD12 LEU X 268     193.793 129.822 227.788  1.00  0.00           H
ATOM   4342 HD13 LEU X 268     194.449 130.394 226.248  1.00  0.00           H
ATOM   4343  CD2 LEU X 268     195.666 128.247 225.360  1.00  0.00           C
ATOM   4344 HD21 LEU X 268     196.524 128.880 225.584  1.00  0.00           H
ATOM   4345 HD22 LEU X 268     196.054 127.243 225.186  1.00  0.00           H
ATOM   4346 HD23 LEU X 268     195.221 128.725 224.487  1.00  0.00           H
ATOM   4347  C   LEU X 268     195.504 124.811 228.023  1.00  0.00           C
ATOM   4348  O   LEU X 268     196.572 124.379 227.547  1.00  0.00           O
ATOM   4349  N   MET X 269     194.978 124.323 229.154  1.00  0.00           N
ATOM   4350  H   MET X 269     194.119 124.788 229.411  1.00  0.00           H
ATOM   4351  CA  MET X 269     195.436 123.207 229.952  1.00  0.00           C
ATOM   4352  HA  MET X 269     196.492 123.209 230.226  1.00  0.00           H
ATOM   4353  CB  MET X 269     194.581 123.062 231.191  1.00  0.00           C
ATOM   4354  HB2 MET X 269     194.803 123.997 231.706  1.00  0.00           H
ATOM   4355  HB3 MET X 269     193.558 123.092 230.816  1.00  0.00           H
ATOM   4356  CG  MET X 269     194.852 121.909 232.218  1.00  0.00           C
ATOM   4357  HG2 MET X 269     195.929 121.791 232.331  1.00  0.00           H
ATOM   4358  HG3 MET X 269     194.414 122.158 233.184  1.00  0.00           H
ATOM   4359  SD  MET X 269     194.295 120.269 231.694  1.00  0.00           S
ATOM   4360  CE  MET X 269     192.463 120.447 231.667  1.00  0.00           C
ATOM   4361  HE1 MET X 269     192.195 121.466 231.387  1.00  0.00           H
ATOM   4362  HE2 MET X 269     192.078 119.759 230.913  1.00  0.00           H
ATOM   4363  HE3 MET X 269     192.030 120.282 232.653  1.00  0.00           H
ATOM   4364  C   MET X 269     195.474 121.947 229.091  1.00  0.00           C
ATOM   4365  O   MET X 269     196.562 121.363 228.942  1.00  0.00           O
ATOM   4366  N   LYS X 270     194.364 121.462 228.442  1.00  0.00           N
ATOM   4367  H   LYS X 270     193.495 121.949 228.608  1.00  0.00           H
ATOM   4368  CA  LYS X 270     194.341 120.283 227.546  1.00  0.00           C
ATOM   4369  HA  LYS X 270     194.753 119.393 228.022  1.00  0.00           H
ATOM   4370  CB  LYS X 270     192.928 120.125 226.935  1.00  0.00           C
ATOM   4371  HB2 LYS X 270     192.195 120.159 227.742  1.00  0.00           H
ATOM   4372  HB3 LYS X 270     192.710 120.990 226.309  1.00  0.00           H
ATOM   4373  CG  LYS X 270     192.622 118.852 226.223  1.00  0.00           C
ATOM   4374  HG2 LYS X 270     191.546 118.751 226.076  1.00  0.00           H
ATOM   4375  HG3 LYS X 270     193.015 118.966 225.212  1.00  0.00           H
ATOM   4376  CD  LYS X 270     193.018 117.498 226.926  1.00  0.00           C
ATOM   4377  HD2 LYS X 270     194.087 117.325 226.801  1.00  0.00           H
ATOM   4378  HD3 LYS X 270     192.750 117.601 227.977  1.00  0.00           H
ATOM   4379  CE  LYS X 270     192.192 116.434 226.324  1.00  0.00           C
ATOM   4380  HE2 LYS X 270     191.143 116.729 226.278  1.00  0.00           H
ATOM   4381  HE3 LYS X 270     192.595 116.386 225.313  1.00  0.00           H
ATOM   4382  NZ  LYS X 270     192.443 115.159 227.029  1.00  0.00           N
ATOM   4383  HZ1 LYS X 270     192.428 115.273 228.032  1.00  0.00           H
ATOM   4384  HZ2 LYS X 270     193.398 114.969 226.761  1.00  0.00           H
ATOM   4385  HZ3 LYS X 270     191.812 114.512 226.577  1.00  0.00           H
ATOM   4386  C   LYS X 270     195.281 120.408 226.344  1.00  0.00           C
ATOM   4387  O   LYS X 270     195.864 119.436 225.873  1.00  0.00           O
ATOM   4388  N   MET X 271     195.454 121.597 225.773  1.00  0.00           N
ATOM   4389  H   MET X 271     194.966 122.436 226.052  1.00  0.00           H
ATOM   4390  CA  MET X 271     196.283 121.811 224.616  1.00  0.00           C
ATOM   4391  HA  MET X 271     195.990 121.128 223.818  1.00  0.00           H
ATOM   4392  CB  MET X 271     196.041 123.211 224.040  1.00  0.00           C
ATOM   4393  HB2 MET X 271     194.996 123.304 223.743  1.00  0.00           H
ATOM   4394  HB3 MET X 271     196.130 123.862 224.910  1.00  0.00           H
ATOM   4395  CG  MET X 271     197.021 123.802 223.027  1.00  0.00           C
ATOM   4396  HG2 MET X 271     197.950 123.997 223.563  1.00  0.00           H
ATOM   4397  HG3 MET X 271     197.337 123.097 222.258  1.00  0.00           H
ATOM   4398  SD  MET X 271     196.402 125.224 222.137  1.00  0.00           S
ATOM   4399  CE  MET X 271     197.807 125.719 221.146  1.00  0.00           C
ATOM   4400  HE1 MET X 271     197.803 126.739 220.762  1.00  0.00           H
ATOM   4401  HE2 MET X 271     198.641 125.451 221.794  1.00  0.00           H
ATOM   4402  HE3 MET X 271     197.894 125.057 220.284  1.00  0.00           H
ATOM   4403  C   MET X 271     197.749 121.723 225.063  1.00  0.00           C
ATOM   4404  O   MET X 271     198.608 121.388 224.232  1.00  0.00           O
ATOM   4405  N   GLU X 272     198.060 122.039 226.301  1.00  0.00           N
ATOM   4406  H   GLU X 272     197.295 122.310 226.903  1.00  0.00           H
ATOM   4407  CA  GLU X 272     199.392 121.812 226.859  1.00  0.00           C
ATOM   4408  HA  GLU X 272     200.109 122.017 226.064  1.00  0.00           H
ATOM   4409  CB  GLU X 272     199.525 122.851 227.986  1.00  0.00           C
ATOM   4410  HB2 GLU X 272     199.450 123.798 227.451  1.00  0.00           H
ATOM   4411  HB3 GLU X 272     198.725 122.732 228.717  1.00  0.00           H
ATOM   4412  CG  GLU X 272     200.838 122.840 228.781  1.00  0.00           C
ATOM   4413  HG2 GLU X 272     200.703 123.547 229.599  1.00  0.00           H
ATOM   4414  HG3 GLU X 272     201.009 121.924 229.346  1.00  0.00           H
ATOM   4415  CD  GLU X 272     202.078 123.312 227.982  1.00  0.00           C
ATOM   4416  OE1 GLU X 272     202.006 123.604 226.757  1.00  0.00           O
ATOM   4417  OE2 GLU X 272     203.180 123.442 228.537  1.00  0.00           O
ATOM   4418  C   GLU X 272     199.704 120.384 227.228  1.00  0.00           C
ATOM   4419  O   GLU X 272     200.827 119.904 227.010  1.00  0.00           O
ATOM   4420  N   LYS X 273     198.686 119.558 227.596  1.00  0.00           N
ATOM   4421  H   LYS X 273     197.804 120.040 227.697  1.00  0.00           H
ATOM   4422  CA  LYS X 273     198.770 118.111 227.614  1.00  0.00           C
ATOM   4423  HA  LYS X 273     199.554 117.847 228.324  1.00  0.00           H
ATOM   4424  CB  LYS X 273     197.381 117.490 228.107  1.00  0.00           C
ATOM   4425  HB2 LYS X 273     196.542 118.055 227.699  1.00  0.00           H
ATOM   4426  HB3 LYS X 273     197.172 116.469 227.786  1.00  0.00           H
ATOM   4427  CG  LYS X 273     197.209 117.561 229.609  1.00  0.00           C
ATOM   4428  HG2 LYS X 273     198.079 117.030 229.993  1.00  0.00           H
ATOM   4429  HG3 LYS X 273     197.181 118.598 229.945  1.00  0.00           H
ATOM   4430  CD  LYS X 273     195.882 116.844 230.057  1.00  0.00           C
ATOM   4431  HD2 LYS X 273     195.073 117.302 229.489  1.00  0.00           H
ATOM   4432  HD3 LYS X 273     196.102 115.782 229.947  1.00  0.00           H
ATOM   4433  CE  LYS X 273     195.585 117.049 231.587  1.00  0.00           C
ATOM   4434  HE2 LYS X 273     195.428 118.123 231.684  1.00  0.00           H
ATOM   4435  HE3 LYS X 273     194.646 116.537 231.796  1.00  0.00           H
ATOM   4436  NZ  LYS X 273     196.775 116.692 232.459  1.00  0.00           N
ATOM   4437  HZ1 LYS X 273     197.110 115.800 232.123  1.00  0.00           H
ATOM   4438  HZ2 LYS X 273     196.430 116.452 233.377  1.00  0.00           H
ATOM   4439  HZ3 LYS X 273     197.463 117.431 232.434  1.00  0.00           H
ATOM   4440  C   LYS X 273     199.102 117.620 226.248  1.00  0.00           C
ATOM   4441  O   LYS X 273     199.960 116.703 226.095  1.00  0.00           O
ATOM   4442  N   GLU X 274     198.540 118.195 225.187  1.00  0.00           N
ATOM   4443  H   GLU X 274     197.774 118.809 225.422  1.00  0.00           H
ATOM   4444  CA  GLU X 274     198.682 117.759 223.790  1.00  0.00           C
ATOM   4445  HA  GLU X 274     198.968 116.707 223.753  1.00  0.00           H
ATOM   4446  CB  GLU X 274     197.344 117.960 223.011  1.00  0.00           C
ATOM   4447  HB2 GLU X 274     196.978 118.968 223.206  1.00  0.00           H
ATOM   4448  HB3 GLU X 274     197.493 117.788 221.946  1.00  0.00           H
ATOM   4449  CG  GLU X 274     196.266 116.977 223.602  1.00  0.00           C
ATOM   4450  HG2 GLU X 274     196.252 116.911 224.690  1.00  0.00           H
ATOM   4451  HG3 GLU X 274     195.282 117.384 223.370  1.00  0.00           H
ATOM   4452  CD  GLU X 274     196.512 115.561 223.042  1.00  0.00           C
ATOM   4453  OE1 GLU X 274     196.417 115.407 221.785  1.00  0.00           O
ATOM   4454  OE2 GLU X 274     196.613 114.668 223.888  1.00  0.00           O
ATOM   4455  C   GLU X 274     199.850 118.369 223.098  1.00  0.00           C
ATOM   4456  O   GLU X 274     200.009 118.129 221.872  1.00  0.00           O
ATOM   4457  N   LYS X 275     200.781 119.068 223.763  1.00  0.00           N
ATOM   4458  H   LYS X 275     200.593 119.378 224.705  1.00  0.00           H
ATOM   4459  CA  LYS X 275     202.050 119.568 223.217  1.00  0.00           C
ATOM   4460  HA  LYS X 275     201.773 120.215 222.385  1.00  0.00           H
ATOM   4461  CB  LYS X 275     202.786 120.357 224.366  1.00  0.00           C
ATOM   4462  HB2 LYS X 275     201.998 121.009 224.744  1.00  0.00           H
ATOM   4463  HB3 LYS X 275     203.191 119.588 225.025  1.00  0.00           H
ATOM   4464  CG  LYS X 275     203.904 121.319 223.909  1.00  0.00           C
ATOM   4465  HG2 LYS X 275     204.638 120.899 223.220  1.00  0.00           H
ATOM   4466  HG3 LYS X 275     203.410 122.102 223.334  1.00  0.00           H
ATOM   4467  CD  LYS X 275     204.583 122.009 225.080  1.00  0.00           C
ATOM   4468  HD2 LYS X 275     205.065 122.964 224.875  1.00  0.00           H
ATOM   4469  HD3 LYS X 275     203.685 122.454 225.510  1.00  0.00           H
ATOM   4470  CE  LYS X 275     205.441 121.360 226.209  1.00  0.00           C
ATOM   4471  HE2 LYS X 275     205.084 120.376 226.513  1.00  0.00           H
ATOM   4472  HE3 LYS X 275     206.409 121.149 225.754  1.00  0.00           H
ATOM   4473  NZ  LYS X 275     205.584 122.270 227.355  1.00  0.00           N
ATOM   4474  HZ1 LYS X 275     204.734 122.412 227.882  1.00  0.00           H
ATOM   4475  HZ2 LYS X 275     205.898 123.166 227.010  1.00  0.00           H
ATOM   4476  HZ3 LYS X 275     206.230 121.862 228.016  1.00  0.00           H
ATOM   4477  C   LYS X 275     202.834 118.389 222.593  1.00  0.00           C
ATOM   4478  O   LYS X 275     202.922 117.313 223.186  1.00  0.00           O
ATOM   4479  N   HID X 276     203.441 118.668 221.464  1.00  0.00           N
ATOM   4480  H   HID X 276     203.429 119.609 221.099  1.00  0.00           H
ATOM   4481  CA  HID X 276     204.171 117.676 220.630  1.00  0.00           C
ATOM   4482  HA  HID X 276     204.685 118.312 219.910  1.00  0.00           H
ATOM   4483  CB  HID X 276     205.414 117.138 221.348  1.00  0.00           C
ATOM   4484  HB2 HID X 276     205.055 116.298 221.942  1.00  0.00           H
ATOM   4485  HB3 HID X 276     206.006 116.780 220.506  1.00  0.00           H
ATOM   4486  CG  HID X 276     206.253 118.041 222.159  1.00  0.00           C
ATOM   4487  ND1 HID X 276     206.927 119.194 221.770  1.00  0.00           N
ATOM   4488  HD1 HID X 276     207.063 119.577 220.846  1.00  0.00           H
ATOM   4489  CE1 HID X 276     207.513 119.665 222.872  1.00  0.00           C
ATOM   4490  HE1 HID X 276     208.128 120.551 222.930  1.00  0.00           H
ATOM   4491  NE2 HID X 276     207.263 118.921 223.950  1.00  0.00           N
ATOM   4492  CD2 HID X 276     206.476 117.876 223.490  1.00  0.00           C
ATOM   4493  HD2 HID X 276     205.900 117.188 224.091  1.00  0.00           H
ATOM   4494  C   HID X 276     203.242 116.655 219.930  1.00  0.00           C
ATOM   4495  O   HID X 276     203.429 116.440 218.739  1.00  0.00           O
ATOM   4496  N   ASN X 277     202.256 116.073 220.622  1.00  0.00           N
ATOM   4497  H   ASN X 277     202.202 116.416 221.570  1.00  0.00           H
ATOM   4498  CA  ASN X 277     201.324 115.047 220.134  1.00  0.00           C
ATOM   4499  HA  ASN X 277     202.027 114.238 219.936  1.00  0.00           H
ATOM   4500  CB  ASN X 277     200.366 114.545 221.206  1.00  0.00           C
ATOM   4501  HB2 ASN X 277     200.966 114.124 222.013  1.00  0.00           H
ATOM   4502  HB3 ASN X 277     199.729 115.374 221.516  1.00  0.00           H
ATOM   4503  CG  ASN X 277     199.505 113.484 220.542  1.00  0.00           C
ATOM   4504  OD1 ASN X 277     199.931 112.492 220.000  1.00  0.00           O
ATOM   4505  ND2 ASN X 277     198.179 113.477 220.491  1.00  0.00           N
ATOM   4506 HD21 ASN X 277     197.627 114.216 220.902  1.00  0.00           H
ATOM   4507 HD22 ASN X 277     197.848 112.689 219.953  1.00  0.00           H
ATOM   4508  C   ASN X 277     200.493 115.536 218.920  1.00  0.00           C
ATOM   4509  O   ASN X 277     199.884 116.613 218.968  1.00  0.00           O
ATOM   4510  N   GLN X 278     200.436 114.661 217.863  1.00  0.00           N
ATOM   4511  H   GLN X 278     201.045 113.861 217.954  1.00  0.00           H
ATOM   4512  CA  GLN X 278     199.603 114.806 216.602  1.00  0.00           C
ATOM   4513  HA  GLN X 278     198.761 115.415 216.931  1.00  0.00           H
ATOM   4514  CB  GLN X 278     200.478 115.455 215.595  1.00  0.00           C
ATOM   4515  HB2 GLN X 278     201.457 114.982 215.520  1.00  0.00           H
ATOM   4516  HB3 GLN X 278     199.940 115.365 214.651  1.00  0.00           H
ATOM   4517  CG  GLN X 278     200.827 116.962 215.845  1.00  0.00           C
ATOM   4518  HG2 GLN X 278     201.485 117.173 216.688  1.00  0.00           H
ATOM   4519  HG3 GLN X 278     201.337 117.341 214.959  1.00  0.00           H
ATOM   4520  CD  GLN X 278     199.557 117.796 216.004  1.00  0.00           C
ATOM   4521  OE1 GLN X 278     198.446 117.443 215.575  1.00  0.00           O
ATOM   4522  NE2 GLN X 278     199.686 118.888 216.719  1.00  0.00           N
ATOM   4523 HE21 GLN X 278     198.936 119.546 216.877  1.00  0.00           H
ATOM   4524 HE22 GLN X 278     200.576 119.166 217.107  1.00  0.00           H
ATOM   4525  C   GLN X 278     199.098 113.422 216.064  1.00  0.00           C
ATOM   4526  O   GLN X 278     199.768 112.462 216.367  1.00  0.00           O
ATOM   4527  N   PRO X 279     197.981 113.292 215.385  1.00  0.00           N
ATOM   4528  CD  PRO X 279     197.649 112.090 214.716  1.00  0.00           C
ATOM   4529  HD2 PRO X 279     197.654 111.392 215.553  1.00  0.00           H
ATOM   4530  HD3 PRO X 279     198.419 111.712 214.043  1.00  0.00           H
ATOM   4531  CG  PRO X 279     196.214 112.285 214.279  1.00  0.00           C
ATOM   4532  HG2 PRO X 279     195.530 111.978 215.070  1.00  0.00           H
ATOM   4533  HG3 PRO X 279     195.929 111.700 213.405  1.00  0.00           H
ATOM   4534  CB  PRO X 279     195.972 113.751 214.089  1.00  0.00           C
ATOM   4535  HB2 PRO X 279     194.935 114.084 214.110  1.00  0.00           H
ATOM   4536  HB3 PRO X 279     196.378 114.093 213.137  1.00  0.00           H
ATOM   4537  CA  PRO X 279     196.928 114.295 215.161  1.00  0.00           C
ATOM   4538  HA  PRO X 279     197.426 115.174 214.750  1.00  0.00           H
ATOM   4539  C   PRO X 279     196.213 114.677 216.383  1.00  0.00           C
ATOM   4540  O   PRO X 279     195.890 113.815 217.201  1.00  0.00           O
ATOM   4541  N   SER X 280     195.936 115.985 216.561  1.00  0.00           N
ATOM   4542  H   SER X 280     196.569 116.609 216.082  1.00  0.00           H
ATOM   4543  CA  SER X 280     195.161 116.450 217.679  1.00  0.00           C
ATOM   4544  HA  SER X 280     194.360 115.746 217.903  1.00  0.00           H
ATOM   4545  CB  SER X 280     196.061 116.793 218.828  1.00  0.00           C
ATOM   4546  HB2 SER X 280     196.722 115.946 219.015  1.00  0.00           H
ATOM   4547  HB3 SER X 280     196.732 117.642 218.700  1.00  0.00           H
ATOM   4548  OG  SER X 280     195.220 116.947 219.928  1.00  0.00           O
ATOM   4549  HG  SER X 280     195.714 116.557 220.652  1.00  0.00           H
ATOM   4550  C   SER X 280     194.392 117.696 217.382  1.00  0.00           C
ATOM   4551  O   SER X 280     194.873 118.676 216.800  1.00  0.00           O
ATOM   4552  N   GLU X 281     193.164 117.667 217.794  1.00  0.00           N
ATOM   4553  H   GLU X 281     192.731 116.847 218.193  1.00  0.00           H
ATOM   4554  CA  GLU X 281     192.244 118.790 217.670  1.00  0.00           C
ATOM   4555  HA  GLU X 281     192.313 119.364 216.746  1.00  0.00           H
ATOM   4556  CB  GLU X 281     190.748 118.345 217.781  1.00  0.00           C
ATOM   4557  HB2 GLU X 281     190.652 117.897 218.770  1.00  0.00           H
ATOM   4558  HB3 GLU X 281     190.044 119.168 217.662  1.00  0.00           H
ATOM   4559  CG  GLU X 281     190.330 117.316 216.659  1.00  0.00           C
ATOM   4560  HG2 GLU X 281     190.535 116.295 216.981  1.00  0.00           H
ATOM   4561  HG3 GLU X 281     189.241 117.334 216.615  1.00  0.00           H
ATOM   4562  CD  GLU X 281     190.849 117.455 215.207  1.00  0.00           C
ATOM   4563  OE1 GLU X 281     191.096 116.435 214.593  1.00  0.00           O
ATOM   4564  OE2 GLU X 281     191.044 118.653 214.723  1.00  0.00           O
ATOM   4565  C   GLU X 281     192.563 119.917 218.643  1.00  0.00           C
ATOM   4566  O   GLU X 281     192.206 121.049 218.422  1.00  0.00           O
ATOM   4567  N   PHE X 282     193.163 119.648 219.753  1.00  0.00           N
ATOM   4568  H   PHE X 282     193.259 118.676 220.011  1.00  0.00           H
ATOM   4569  CA  PHE X 282     193.498 120.638 220.784  1.00  0.00           C
ATOM   4570  HA  PHE X 282     192.666 121.332 220.902  1.00  0.00           H
ATOM   4571  CB  PHE X 282     193.724 119.814 222.031  1.00  0.00           C
ATOM   4572  HB2 PHE X 282     194.542 119.096 221.965  1.00  0.00           H
ATOM   4573  HB3 PHE X 282     193.938 120.500 222.850  1.00  0.00           H
ATOM   4574  CG  PHE X 282     192.576 118.917 222.408  1.00  0.00           C
ATOM   4575  CD1 PHE X 282     192.573 117.546 222.197  1.00  0.00           C
ATOM   4576  HD1 PHE X 282     193.398 117.013 221.747  1.00  0.00           H
ATOM   4577  CE1 PHE X 282     191.389 116.850 222.480  1.00  0.00           C
ATOM   4578  HE1 PHE X 282     191.433 115.774 222.559  1.00  0.00           H
ATOM   4579  CZ  PHE X 282     190.185 117.417 223.054  1.00  0.00           C
ATOM   4580  HZ  PHE X 282     189.274 116.838 223.088  1.00  0.00           H
ATOM   4581  CE2 PHE X 282     190.282 118.799 223.292  1.00  0.00           C
ATOM   4582  HE2 PHE X 282     189.379 119.296 223.614  1.00  0.00           H
ATOM   4583  CD2 PHE X 282     191.407 119.592 222.951  1.00  0.00           C
ATOM   4584  HD2 PHE X 282     191.371 120.648 223.174  1.00  0.00           H
ATOM   4585  C   PHE X 282     194.670 121.555 220.322  1.00  0.00           C
ATOM   4586  O   PHE X 282     195.766 121.478 220.843  1.00  0.00           O
ATOM   4587  N   THR X 283     194.232 122.559 219.514  1.00  0.00           N
ATOM   4588  H   THR X 283     193.253 122.517 219.272  1.00  0.00           H
ATOM   4589  CA  THR X 283     194.973 123.755 218.995  1.00  0.00           C
ATOM   4590  HA  THR X 283     195.782 123.923 219.706  1.00  0.00           H
ATOM   4591  CB  THR X 283     195.884 123.351 217.841  1.00  0.00           C
ATOM   4592  HB  THR X 283     196.399 122.423 218.089  1.00  0.00           H
ATOM   4593  CG2 THR X 283     195.086 122.974 216.512  1.00  0.00           C
ATOM   4594 HG21 THR X 283     194.525 123.771 216.024  1.00  0.00           H
ATOM   4595 HG22 THR X 283     194.359 122.188 216.716  1.00  0.00           H
ATOM   4596 HG23 THR X 283     195.718 122.550 215.732  1.00  0.00           H
ATOM   4597  OG1 THR X 283     196.915 124.262 217.564  1.00  0.00           O
ATOM   4598  HG1 THR X 283     197.612 123.762 217.134  1.00  0.00           H
ATOM   4599  C   THR X 283     194.104 124.938 218.710  1.00  0.00           C
ATOM   4600  O   THR X 283     192.933 124.882 218.803  1.00  0.00           O
ATOM   4601  N   ILE X 284     194.761 126.119 218.650  1.00  0.00           N
ATOM   4602  H   ILE X 284     195.767 126.135 218.561  1.00  0.00           H
ATOM   4603  CA  ILE X 284     194.157 127.455 218.802  1.00  0.00           C
ATOM   4604  HA  ILE X 284     193.839 127.237 219.821  1.00  0.00           H
ATOM   4605  CB  ILE X 284     195.212 128.581 218.865  1.00  0.00           C
ATOM   4606  HB  ILE X 284     195.795 128.306 219.744  1.00  0.00           H
ATOM   4607  CG2 ILE X 284     196.191 128.727 217.647  1.00  0.00           C
ATOM   4608 HG21 ILE X 284     196.835 127.849 217.599  1.00  0.00           H
ATOM   4609 HG22 ILE X 284     196.820 129.599 217.827  1.00  0.00           H
ATOM   4610 HG23 ILE X 284     195.602 128.887 216.743  1.00  0.00           H
ATOM   4611  CG1 ILE X 284     194.523 129.919 219.212  1.00  0.00           C
ATOM   4612 HG12 ILE X 284     195.300 130.682 219.178  1.00  0.00           H
ATOM   4613 HG13 ILE X 284     193.783 130.231 218.476  1.00  0.00           H
ATOM   4614  CD1 ILE X 284     193.920 130.067 220.601  1.00  0.00           C
ATOM   4615 HD11 ILE X 284     193.053 129.418 220.477  1.00  0.00           H
ATOM   4616 HD12 ILE X 284     193.712 131.112 220.830  1.00  0.00           H
ATOM   4617 HD13 ILE X 284     194.655 129.766 221.348  1.00  0.00           H
ATOM   4618  C   ILE X 284     192.950 127.732 217.837  1.00  0.00           C
ATOM   4619  O   ILE X 284     191.845 128.128 218.152  1.00  0.00           O
ATOM   4620  N   GLU X 285     193.212 127.345 216.570  1.00  0.00           N
ATOM   4621  H   GLU X 285     194.145 127.020 216.361  1.00  0.00           H
ATOM   4622  CA  GLU X 285     192.168 127.335 215.516  1.00  0.00           C
ATOM   4623  HA  GLU X 285     191.720 128.318 215.368  1.00  0.00           H
ATOM   4624  CB  GLU X 285     192.814 126.806 214.238  1.00  0.00           C
ATOM   4625  HB2 GLU X 285     193.740 127.360 214.084  1.00  0.00           H
ATOM   4626  HB3 GLU X 285     193.109 125.772 214.421  1.00  0.00           H
ATOM   4627  CG  GLU X 285     191.896 126.870 213.094  1.00  0.00           C
ATOM   4628  HG2 GLU X 285     192.312 126.401 212.202  1.00  0.00           H
ATOM   4629  HG3 GLU X 285     191.029 126.254 213.333  1.00  0.00           H
ATOM   4630  CD  GLU X 285     191.365 128.268 212.629  1.00  0.00           C
ATOM   4631  OE1 GLU X 285     190.627 128.280 211.642  1.00  0.00           O
ATOM   4632  OE2 GLU X 285     191.615 129.384 213.226  1.00  0.00           O
ATOM   4633  C   GLU X 285     190.858 126.503 215.862  1.00  0.00           C
ATOM   4634  O   GLU X 285     189.728 126.843 215.559  1.00  0.00           O
ATOM   4635  N   SER X 286     191.016 125.426 216.692  1.00  0.00           N
ATOM   4636  H   SER X 286     191.896 125.361 217.184  1.00  0.00           H
ATOM   4637  CA  SER X 286     189.910 124.621 217.198  1.00  0.00           C
ATOM   4638  HA  SER X 286     189.224 124.441 216.370  1.00  0.00           H
ATOM   4639  CB  SER X 286     190.311 123.242 217.670  1.00  0.00           C
ATOM   4640  HB2 SER X 286     190.795 123.399 218.633  1.00  0.00           H
ATOM   4641  HB3 SER X 286     189.363 122.739 217.860  1.00  0.00           H
ATOM   4642  OG  SER X 286     191.140 122.505 216.815  1.00  0.00           O
ATOM   4643  HG  SER X 286     191.525 121.830 217.379  1.00  0.00           H
ATOM   4644  C   SER X 286     189.163 125.365 218.273  1.00  0.00           C
ATOM   4645  O   SER X 286     187.923 125.347 218.225  1.00  0.00           O
ATOM   4646  N   LEU X 287     189.805 126.120 219.197  1.00  0.00           N
ATOM   4647  H   LEU X 287     190.814 126.077 219.199  1.00  0.00           H
ATOM   4648  CA  LEU X 287     189.148 126.957 220.200  1.00  0.00           C
ATOM   4649  HA  LEU X 287     188.408 126.403 220.777  1.00  0.00           H
ATOM   4650  CB  LEU X 287     190.123 127.434 221.194  1.00  0.00           C
ATOM   4651  HB2 LEU X 287     190.548 126.592 221.739  1.00  0.00           H
ATOM   4652  HB3 LEU X 287     190.987 127.788 220.632  1.00  0.00           H
ATOM   4653  CG  LEU X 287     189.623 128.519 222.208  1.00  0.00           C
ATOM   4654  HG  LEU X 287     189.249 129.377 221.649  1.00  0.00           H
ATOM   4655  CD1 LEU X 287     188.534 128.010 223.106  1.00  0.00           C
ATOM   4656 HD11 LEU X 287     188.779 127.088 223.634  1.00  0.00           H
ATOM   4657 HD12 LEU X 287     187.695 127.668 222.500  1.00  0.00           H
ATOM   4658 HD13 LEU X 287     188.144 128.856 223.672  1.00  0.00           H
ATOM   4659  CD2 LEU X 287     190.772 129.032 223.054  1.00  0.00           C
ATOM   4660 HD21 LEU X 287     191.491 129.498 222.381  1.00  0.00           H
ATOM   4661 HD22 LEU X 287     190.406 129.753 223.784  1.00  0.00           H
ATOM   4662 HD23 LEU X 287     191.245 128.158 223.503  1.00  0.00           H
ATOM   4663  C   LEU X 287     188.341 128.026 219.524  1.00  0.00           C
ATOM   4664  O   LEU X 287     187.137 128.115 219.811  1.00  0.00           O
ATOM   4665  N   GLU X 288     188.948 128.862 218.675  1.00  0.00           N
ATOM   4666  H   GLU X 288     189.860 128.526 218.398  1.00  0.00           H
ATOM   4667  CA  GLU X 288     188.334 129.985 217.939  1.00  0.00           C
ATOM   4668  HA  GLU X 288     188.031 130.810 218.584  1.00  0.00           H
ATOM   4669  CB  GLU X 288     189.363 130.518 216.976  1.00  0.00           C
ATOM   4670  HB2 GLU X 288     189.862 129.654 216.537  1.00  0.00           H
ATOM   4671  HB3 GLU X 288     188.848 131.019 216.157  1.00  0.00           H
ATOM   4672  CG  GLU X 288     190.374 131.461 217.654  1.00  0.00           C
ATOM   4673  HG2 GLU X 288     189.737 132.224 218.101  1.00  0.00           H
ATOM   4674  HG3 GLU X 288     190.887 130.873 218.416  1.00  0.00           H
ATOM   4675  CD  GLU X 288     191.319 132.137 216.606  1.00  0.00           C
ATOM   4676  OE1 GLU X 288     192.505 131.764 216.534  1.00  0.00           O
ATOM   4677  OE2 GLU X 288     190.786 132.840 215.678  1.00  0.00           O
ATOM   4678  C   GLU X 288     187.047 129.546 217.159  1.00  0.00           C
ATOM   4679  O   GLU X 288     186.006 130.208 217.364  1.00  0.00           O
ATOM   4680  N   ASN X 289     187.093 128.382 216.415  1.00  0.00           N
ATOM   4681  H   ASN X 289     187.972 127.970 216.132  1.00  0.00           H
ATOM   4682  CA  ASN X 289     185.954 127.806 215.644  1.00  0.00           C
ATOM   4683  HA  ASN X 289     185.540 128.689 215.157  1.00  0.00           H
ATOM   4684  CB  ASN X 289     186.439 127.010 214.423  1.00  0.00           C
ATOM   4685  HB2 ASN X 289     187.069 126.205 214.801  1.00  0.00           H
ATOM   4686  HB3 ASN X 289     185.502 126.594 214.055  1.00  0.00           H
ATOM   4687  CG  ASN X 289     187.190 127.803 213.307  1.00  0.00           C
ATOM   4688  OD1 ASN X 289     186.609 128.299 212.369  1.00  0.00           O
ATOM   4689  ND2 ASN X 289     188.481 127.850 213.321  1.00  0.00           N
ATOM   4690 HD21 ASN X 289     188.968 127.437 214.104  1.00  0.00           H
ATOM   4691 HD22 ASN X 289     188.893 128.143 212.447  1.00  0.00           H
ATOM   4692  C   ASN X 289     184.900 127.089 216.484  1.00  0.00           C
ATOM   4693  O   ASN X 289     183.703 127.146 216.285  1.00  0.00           O
ATOM   4694  N   THR X 290     185.316 126.354 217.511  1.00  0.00           N
ATOM   4695  H   THR X 290     186.261 126.000 217.538  1.00  0.00           H
ATOM   4696  CA  THR X 290     184.443 125.990 218.682  1.00  0.00           C
ATOM   4697  HA  THR X 290     183.617 125.349 218.373  1.00  0.00           H
ATOM   4698  CB  THR X 290     185.309 125.172 219.685  1.00  0.00           C
ATOM   4699  HB  THR X 290     186.211 125.711 219.976  1.00  0.00           H
ATOM   4700  CG2 THR X 290     184.448 124.764 220.854  1.00  0.00           C
ATOM   4701 HG21 THR X 290     183.460 124.632 220.414  1.00  0.00           H
ATOM   4702 HG22 THR X 290     184.345 125.701 221.401  1.00  0.00           H
ATOM   4703 HG23 THR X 290     184.913 124.009 221.488  1.00  0.00           H
ATOM   4704  OG1 THR X 290     185.807 124.015 219.119  1.00  0.00           O
ATOM   4705  HG1 THR X 290     186.467 124.315 218.490  1.00  0.00           H
ATOM   4706  C   THR X 290     183.673 127.150 219.322  1.00  0.00           C
ATOM   4707  O   THR X 290     182.424 127.078 219.433  1.00  0.00           O
ATOM   4708  N   ALA X 291     184.302 128.192 219.856  1.00  0.00           N
ATOM   4709  H   ALA X 291     185.308 128.161 219.771  1.00  0.00           H
ATOM   4710  CA  ALA X 291     183.703 129.221 220.687  1.00  0.00           C
ATOM   4711  HA  ALA X 291     183.277 128.751 221.574  1.00  0.00           H
ATOM   4712  CB  ALA X 291     184.789 130.204 221.148  1.00  0.00           C
ATOM   4713  HB1 ALA X 291     184.293 130.983 221.727  1.00  0.00           H
ATOM   4714  HB2 ALA X 291     185.431 130.500 220.319  1.00  0.00           H
ATOM   4715  HB3 ALA X 291     185.490 129.828 221.894  1.00  0.00           H
ATOM   4716  C   ALA X 291     182.572 129.881 219.978  1.00  0.00           C
ATOM   4717  O   ALA X 291     181.486 129.896 220.613  1.00  0.00           O
ATOM   4718  N   VAL X 292     182.796 130.345 218.714  1.00  0.00           N
ATOM   4719  H   VAL X 292     183.696 130.052 218.360  1.00  0.00           H
ATOM   4720  CA  VAL X 292     181.745 131.010 217.881  1.00  0.00           C
ATOM   4721  HA  VAL X 292     181.372 131.983 218.198  1.00  0.00           H
ATOM   4722  CB  VAL X 292     182.240 131.417 216.461  1.00  0.00           C
ATOM   4723  HB  VAL X 292     181.462 131.989 215.957  1.00  0.00           H
ATOM   4724  CG1 VAL X 292     183.387 132.452 216.651  1.00  0.00           C
ATOM   4725 HG11 VAL X 292     183.639 132.839 215.664  1.00  0.00           H
ATOM   4726 HG12 VAL X 292     183.121 133.215 217.383  1.00  0.00           H
ATOM   4727 HG13 VAL X 292     184.244 131.954 217.104  1.00  0.00           H
ATOM   4728  CG2 VAL X 292     182.728 130.244 215.658  1.00  0.00           C
ATOM   4729 HG21 VAL X 292     182.930 130.585 214.643  1.00  0.00           H
ATOM   4730 HG22 VAL X 292     181.914 129.518 215.642  1.00  0.00           H
ATOM   4731 HG23 VAL X 292     183.634 129.782 216.050  1.00  0.00           H
ATOM   4732  C   VAL X 292     180.518 130.058 217.736  1.00  0.00           C
ATOM   4733  O   VAL X 292     179.413 130.509 217.444  1.00  0.00           O
ATOM   4734  N   ASP X 293     180.621 128.754 217.857  1.00  0.00           N
ATOM   4735  H   ASP X 293     181.535 128.337 217.964  1.00  0.00           H
ATOM   4736  CA  ASP X 293     179.507 127.766 217.808  1.00  0.00           C
ATOM   4737  HA  ASP X 293     178.730 128.071 217.107  1.00  0.00           H
ATOM   4738  CB  ASP X 293     179.986 126.377 217.451  1.00  0.00           C
ATOM   4739  HB2 ASP X 293     180.829 126.084 218.077  1.00  0.00           H
ATOM   4740  HB3 ASP X 293     179.248 125.612 217.692  1.00  0.00           H
ATOM   4741  CG  ASP X 293     180.418 126.236 215.969  1.00  0.00           C
ATOM   4742  OD1 ASP X 293     180.280 127.227 215.205  1.00  0.00           O
ATOM   4743  OD2 ASP X 293     180.674 125.099 215.577  1.00  0.00           O
ATOM   4744  C   ASP X 293     178.910 127.679 219.194  1.00  0.00           C
ATOM   4745  O   ASP X 293     177.720 127.758 219.250  1.00  0.00           O
ATOM   4746  N   LEU X 294     179.657 127.451 220.305  1.00  0.00           N
ATOM   4747  H   LEU X 294     180.657 127.330 220.228  1.00  0.00           H
ATOM   4748  CA  LEU X 294     179.129 127.365 221.647  1.00  0.00           C
ATOM   4749  HA  LEU X 294     178.338 126.615 221.645  1.00  0.00           H
ATOM   4750  CB  LEU X 294     180.303 126.950 222.525  1.00  0.00           C
ATOM   4751  HB2 LEU X 294     181.105 127.686 222.465  1.00  0.00           H
ATOM   4752  HB3 LEU X 294     179.971 126.871 223.561  1.00  0.00           H
ATOM   4753  CG  LEU X 294     180.827 125.506 222.121  1.00  0.00           C
ATOM   4754  HG  LEU X 294     181.510 125.548 221.273  1.00  0.00           H
ATOM   4755  CD1 LEU X 294     181.644 124.884 223.327  1.00  0.00           C
ATOM   4756 HD11 LEU X 294     182.437 125.545 223.676  1.00  0.00           H
ATOM   4757 HD12 LEU X 294     182.079 123.894 223.185  1.00  0.00           H
ATOM   4758 HD13 LEU X 294     180.972 124.798 224.181  1.00  0.00           H
ATOM   4759  CD2 LEU X 294     179.734 124.518 221.817  1.00  0.00           C
ATOM   4760 HD21 LEU X 294     179.183 124.783 220.915  1.00  0.00           H
ATOM   4761 HD22 LEU X 294     180.182 123.526 221.767  1.00  0.00           H
ATOM   4762 HD23 LEU X 294     178.933 124.518 222.556  1.00  0.00           H
ATOM   4763  C   LEU X 294     178.395 128.592 222.137  1.00  0.00           C
ATOM   4764  O   LEU X 294     177.396 128.337 222.820  1.00  0.00           O
ATOM   4765  N   PHE X 295     178.688 129.803 221.732  1.00  0.00           N
ATOM   4766  H   PHE X 295     179.613 129.831 221.329  1.00  0.00           H
ATOM   4767  CA  PHE X 295     177.778 130.930 221.873  1.00  0.00           C
ATOM   4768  HA  PHE X 295     177.425 131.069 222.895  1.00  0.00           H
ATOM   4769  CB  PHE X 295     178.510 132.271 221.463  1.00  0.00           C
ATOM   4770  HB2 PHE X 295     179.096 132.273 220.544  1.00  0.00           H
ATOM   4771  HB3 PHE X 295     177.781 133.065 221.302  1.00  0.00           H
ATOM   4772  CG  PHE X 295     179.429 132.870 222.524  1.00  0.00           C
ATOM   4773  CD1 PHE X 295     178.886 133.591 223.660  1.00  0.00           C
ATOM   4774  HD1 PHE X 295     177.820 133.761 223.674  1.00  0.00           H
ATOM   4775  CE1 PHE X 295     179.656 133.995 224.765  1.00  0.00           C
ATOM   4776  HE1 PHE X 295     179.223 134.504 225.613  1.00  0.00           H
ATOM   4777  CZ  PHE X 295     181.025 133.826 224.753  1.00  0.00           C
ATOM   4778  HZ  PHE X 295     181.559 134.101 225.651  1.00  0.00           H
ATOM   4779  CE2 PHE X 295     181.560 133.205 223.693  1.00  0.00           C
ATOM   4780  HE2 PHE X 295     182.632 133.077 223.664  1.00  0.00           H
ATOM   4781  CD2 PHE X 295     180.822 132.693 222.576  1.00  0.00           C
ATOM   4782  HD2 PHE X 295     181.394 132.289 221.755  1.00  0.00           H
ATOM   4783  C   PHE X 295     176.685 130.849 220.795  1.00  0.00           C
ATOM   4784  O   PHE X 295     175.525 131.218 221.110  1.00  0.00           O
ATOM   4785  N   GLY X 296     176.978 130.486 219.512  1.00  0.00           N
ATOM   4786  H   GLY X 296     177.929 130.195 219.338  1.00  0.00           H
ATOM   4787  CA  GLY X 296     176.076 130.911 218.439  1.00  0.00           C
ATOM   4788  HA2 GLY X 296     176.024 132.000 218.418  1.00  0.00           H
ATOM   4789  HA3 GLY X 296     176.515 130.662 217.473  1.00  0.00           H
ATOM   4790  C   GLY X 296     174.702 130.160 218.538  1.00  0.00           C
ATOM   4791  O   GLY X 296     173.716 130.909 218.631  1.00  0.00           O
ATOM   4792  N   ALA X 297     174.659 128.820 218.602  1.00  0.00           N
ATOM   4793  H   ALA X 297     175.625 128.527 218.634  1.00  0.00           H
ATOM   4794  CA  ALA X 297     173.438 127.969 218.675  1.00  0.00           C
ATOM   4795  HA  ALA X 297     172.718 128.382 217.969  1.00  0.00           H
ATOM   4796  CB  ALA X 297     173.781 126.490 218.351  1.00  0.00           C
ATOM   4797  HB1 ALA X 297     172.913 125.890 218.080  1.00  0.00           H
ATOM   4798  HB2 ALA X 297     174.299 126.080 219.218  1.00  0.00           H
ATOM   4799  HB3 ALA X 297     174.391 126.433 217.449  1.00  0.00           H
ATOM   4800  C   ALA X 297     172.867 128.237 220.055  1.00  0.00           C
ATOM   4801  O   ALA X 297     171.729 128.595 220.104  1.00  0.00           O
ATOM   4802  N   GLY X 298     173.672 128.123 221.129  1.00  0.00           N
ATOM   4803  H   GLY X 298     174.617 127.789 221.006  1.00  0.00           H
ATOM   4804  CA  GLY X 298     173.218 128.232 222.519  1.00  0.00           C
ATOM   4805  HA2 GLY X 298     172.523 127.409 222.682  1.00  0.00           H
ATOM   4806  HA3 GLY X 298     174.104 128.149 223.149  1.00  0.00           H
ATOM   4807  C   GLY X 298     172.600 129.580 222.918  1.00  0.00           C
ATOM   4808  O   GLY X 298     171.513 129.635 223.532  1.00  0.00           O
ATOM   4809  N   THR X 299     173.040 130.729 222.439  1.00  0.00           N
ATOM   4810  H   THR X 299     173.802 130.711 221.776  1.00  0.00           H
ATOM   4811  CA  THR X 299     172.364 131.995 222.666  1.00  0.00           C
ATOM   4812  HA  THR X 299     172.047 131.919 223.706  1.00  0.00           H
ATOM   4813  CB  THR X 299     173.206 133.204 222.440  1.00  0.00           C
ATOM   4814  HB  THR X 299     173.442 133.301 221.380  1.00  0.00           H
ATOM   4815  CG2 THR X 299     172.394 134.507 222.881  1.00  0.00           C
ATOM   4816 HG21 THR X 299     171.602 134.805 222.193  1.00  0.00           H
ATOM   4817 HG22 THR X 299     173.101 135.336 222.856  1.00  0.00           H
ATOM   4818 HG23 THR X 299     171.876 134.373 223.831  1.00  0.00           H
ATOM   4819  OG1 THR X 299     174.388 133.098 223.126  1.00  0.00           O
ATOM   4820  HG1 THR X 299     174.669 132.196 222.954  1.00  0.00           H
ATOM   4821  C   THR X 299     171.079 132.139 221.902  1.00  0.00           C
ATOM   4822  O   THR X 299     170.109 132.726 222.404  1.00  0.00           O
ATOM   4823  N   GLU X 300     171.057 131.564 220.672  1.00  0.00           N
ATOM   4824  H   GLU X 300     171.807 130.969 220.351  1.00  0.00           H
ATOM   4825  CA  GLU X 300     169.782 131.524 219.951  1.00  0.00           C
ATOM   4826  HA  GLU X 300     169.277 132.480 220.089  1.00  0.00           H
ATOM   4827  CB  GLU X 300     169.988 131.450 218.426  1.00  0.00           C
ATOM   4828  HB2 GLU X 300     170.741 132.204 218.197  1.00  0.00           H
ATOM   4829  HB3 GLU X 300     170.342 130.444 218.200  1.00  0.00           H
ATOM   4830  CG  GLU X 300     168.858 131.630 217.549  1.00  0.00           C
ATOM   4831  HG2 GLU X 300     169.147 131.303 216.550  1.00  0.00           H
ATOM   4832  HG3 GLU X 300     167.958 131.152 217.936  1.00  0.00           H
ATOM   4833  CD  GLU X 300     168.491 133.120 217.386  1.00  0.00           C
ATOM   4834  OE1 GLU X 300     168.512 133.902 218.394  1.00  0.00           O
ATOM   4835  OE2 GLU X 300     168.147 133.661 216.292  1.00  0.00           O
ATOM   4836  C   GLU X 300     168.686 130.613 220.452  1.00  0.00           C
ATOM   4837  O   GLU X 300     167.545 131.160 220.554  1.00  0.00           O
ATOM   4838  N   THR X 301     168.886 129.289 220.719  1.00  0.00           N
ATOM   4839  H   THR X 301     169.833 128.940 220.688  1.00  0.00           H
ATOM   4840  CA  THR X 301     167.811 128.421 221.208  1.00  0.00           C
ATOM   4841  HA  THR X 301     166.885 128.590 220.660  1.00  0.00           H
ATOM   4842  CB  THR X 301     168.184 126.918 221.239  1.00  0.00           C
ATOM   4843  HB  THR X 301     167.418 126.424 221.836  1.00  0.00           H
ATOM   4844  CG2 THR X 301     168.196 126.081 219.899  1.00  0.00           C
ATOM   4845 HG21 THR X 301     168.853 126.426 219.101  1.00  0.00           H
ATOM   4846 HG22 THR X 301     167.188 126.185 219.496  1.00  0.00           H
ATOM   4847 HG23 THR X 301     168.384 125.082 220.292  1.00  0.00           H
ATOM   4848  OG1 THR X 301     169.504 126.821 221.834  1.00  0.00           O
ATOM   4849  HG1 THR X 301     169.474 126.104 222.472  1.00  0.00           H
ATOM   4850  C   THR X 301     167.370 128.885 222.622  1.00  0.00           C
ATOM   4851  O   THR X 301     166.141 128.863 222.845  1.00  0.00           O
ATOM   4852  N   THR X 302     168.258 129.227 223.550  1.00  0.00           N
ATOM   4853  H   THR X 302     169.248 129.299 223.363  1.00  0.00           H
ATOM   4854  CA  THR X 302     167.805 129.769 224.854  1.00  0.00           C
ATOM   4855  HA  THR X 302     167.224 128.953 225.284  1.00  0.00           H
ATOM   4856  CB  THR X 302     168.922 130.106 225.850  1.00  0.00           C
ATOM   4857  HB  THR X 302     168.457 130.414 226.787  1.00  0.00           H
ATOM   4858  CG2 THR X 302     169.640 128.889 226.256  1.00  0.00           C
ATOM   4859 HG21 THR X 302     170.398 129.120 227.004  1.00  0.00           H
ATOM   4860 HG22 THR X 302     170.098 128.424 225.383  1.00  0.00           H
ATOM   4861 HG23 THR X 302     168.825 128.265 226.623  1.00  0.00           H
ATOM   4862  OG1 THR X 302     169.741 131.093 225.254  1.00  0.00           O
ATOM   4863  HG1 THR X 302     170.403 130.576 224.789  1.00  0.00           H
ATOM   4864  C   THR X 302     166.886 131.125 224.743  1.00  0.00           C
ATOM   4865  O   THR X 302     165.788 131.155 225.321  1.00  0.00           O
ATOM   4866  N   SER X 303     167.374 132.204 224.073  1.00  0.00           N
ATOM   4867  H   SER X 303     168.307 132.111 223.698  1.00  0.00           H
ATOM   4868  CA  SER X 303     166.876 133.605 224.085  1.00  0.00           C
ATOM   4869  HA  SER X 303     166.712 133.784 225.148  1.00  0.00           H
ATOM   4870  CB  SER X 303     167.834 134.616 223.505  1.00  0.00           C
ATOM   4871  HB2 SER X 303     167.391 135.604 223.623  1.00  0.00           H
ATOM   4872  HB3 SER X 303     168.817 134.589 223.975  1.00  0.00           H
ATOM   4873  OG  SER X 303     168.054 134.417 222.101  1.00  0.00           O
ATOM   4874  HG  SER X 303     168.679 133.692 222.021  1.00  0.00           H
ATOM   4875  C   SER X 303     165.534 133.709 223.398  1.00  0.00           C
ATOM   4876  O   SER X 303     164.598 134.429 223.827  1.00  0.00           O
ATOM   4877  N   THR X 304     165.409 133.020 222.235  1.00  0.00           N
ATOM   4878  H   THR X 304     166.268 132.508 222.098  1.00  0.00           H
ATOM   4879  CA  THR X 304     164.179 132.813 221.536  1.00  0.00           C
ATOM   4880  HA  THR X 304     163.748 133.729 221.132  1.00  0.00           H
ATOM   4881  CB  THR X 304     164.388 132.023 220.243  1.00  0.00           C
ATOM   4882  HB  THR X 304     164.734 131.025 220.514  1.00  0.00           H
ATOM   4883  CG2 THR X 304     163.212 132.036 219.233  1.00  0.00           C
ATOM   4884 HG21 THR X 304     162.423 131.456 219.711  1.00  0.00           H
ATOM   4885 HG22 THR X 304     163.462 131.360 218.416  1.00  0.00           H
ATOM   4886 HG23 THR X 304     163.011 132.985 218.736  1.00  0.00           H
ATOM   4887  OG1 THR X 304     165.408 132.716 219.557  1.00  0.00           O
ATOM   4888  HG1 THR X 304     166.202 132.551 220.069  1.00  0.00           H
ATOM   4889  C   THR X 304     163.142 132.015 222.357  1.00  0.00           C
ATOM   4890  O   THR X 304     161.953 132.401 222.352  1.00  0.00           O
ATOM   4891  N   THR X 305     163.617 130.966 223.027  1.00  0.00           N
ATOM   4892  H   THR X 305     164.552 130.620 222.861  1.00  0.00           H
ATOM   4893  CA  THR X 305     162.793 130.198 223.978  1.00  0.00           C
ATOM   4894  HA  THR X 305     161.842 129.905 223.532  1.00  0.00           H
ATOM   4895  CB  THR X 305     163.497 128.930 224.544  1.00  0.00           C
ATOM   4896  HB  THR X 305     164.495 129.115 224.941  1.00  0.00           H
ATOM   4897  CG2 THR X 305     162.644 128.229 225.578  1.00  0.00           C
ATOM   4898 HG21 THR X 305     161.571 128.256 225.388  1.00  0.00           H
ATOM   4899 HG22 THR X 305     162.799 128.698 226.550  1.00  0.00           H
ATOM   4900 HG23 THR X 305     162.977 127.207 225.760  1.00  0.00           H
ATOM   4901  OG1 THR X 305     163.713 127.952 223.590  1.00  0.00           O
ATOM   4902  HG1 THR X 305     164.475 128.126 223.032  1.00  0.00           H
ATOM   4903  C   THR X 305     162.309 131.084 225.128  1.00  0.00           C
ATOM   4904  O   THR X 305     161.079 131.192 225.428  1.00  0.00           O
ATOM   4905  N   LEU X 306     163.162 131.955 225.697  1.00  0.00           N
ATOM   4906  H   LEU X 306     164.159 131.848 225.574  1.00  0.00           H
ATOM   4907  CA  LEU X 306     162.753 132.861 226.758  1.00  0.00           C
ATOM   4908  HA  LEU X 306     162.308 132.343 227.607  1.00  0.00           H
ATOM   4909  CB  LEU X 306     163.979 133.555 227.313  1.00  0.00           C
ATOM   4910  HB2 LEU X 306     164.677 133.797 226.511  1.00  0.00           H
ATOM   4911  HB3 LEU X 306     163.760 134.551 227.698  1.00  0.00           H
ATOM   4912  CG  LEU X 306     164.850 132.648 228.299  1.00  0.00           C
ATOM   4913  HG  LEU X 306     164.934 131.638 227.900  1.00  0.00           H
ATOM   4914  CD1 LEU X 306     166.245 133.155 228.550  1.00  0.00           C
ATOM   4915 HD11 LEU X 306     166.814 132.877 227.663  1.00  0.00           H
ATOM   4916 HD12 LEU X 306     166.656 132.585 229.384  1.00  0.00           H
ATOM   4917 HD13 LEU X 306     166.271 134.231 228.725  1.00  0.00           H
ATOM   4918  CD2 LEU X 306     164.089 132.412 229.596  1.00  0.00           C
ATOM   4919 HD21 LEU X 306     163.150 131.911 229.359  1.00  0.00           H
ATOM   4920 HD22 LEU X 306     164.622 131.753 230.282  1.00  0.00           H
ATOM   4921 HD23 LEU X 306     163.832 133.334 230.116  1.00  0.00           H
ATOM   4922  C   LEU X 306     161.799 133.945 226.317  1.00  0.00           C
ATOM   4923  O   LEU X 306     160.867 134.211 227.012  1.00  0.00           O
ATOM   4924  N   ARG X 307     161.978 134.470 225.134  1.00  0.00           N
ATOM   4925  H   ARG X 307     162.759 134.127 224.593  1.00  0.00           H
ATOM   4926  CA  ARG X 307     160.959 135.437 224.559  1.00  0.00           C
ATOM   4927  HA  ARG X 307     160.777 136.369 225.094  1.00  0.00           H
ATOM   4928  CB  ARG X 307     161.466 135.890 223.185  1.00  0.00           C
ATOM   4929  HB2 ARG X 307     161.743 135.044 222.556  1.00  0.00           H
ATOM   4930  HB3 ARG X 307     160.619 136.351 222.676  1.00  0.00           H
ATOM   4931  CG  ARG X 307     162.629 136.826 223.294  1.00  0.00           C
ATOM   4932  HG2 ARG X 307     162.136 137.771 223.526  1.00  0.00           H
ATOM   4933  HG3 ARG X 307     163.212 136.548 224.172  1.00  0.00           H
ATOM   4934  CD  ARG X 307     163.525 136.974 222.075  1.00  0.00           C
ATOM   4935  HD2 ARG X 307     164.277 137.756 222.184  1.00  0.00           H
ATOM   4936  HD3 ARG X 307     164.072 136.031 222.048  1.00  0.00           H
ATOM   4937  NE  ARG X 307     162.670 137.154 220.906  1.00  0.00           N
ATOM   4938  HE  ARG X 307     161.701 137.402 221.048  1.00  0.00           H
ATOM   4939  CZ  ARG X 307     162.964 136.871 219.682  1.00  0.00           C
ATOM   4940  NH1 ARG X 307     164.109 136.380 219.298  1.00  0.00           N
ATOM   4941 HH11 ARG X 307     164.895 136.217 219.911  1.00  0.00           H
ATOM   4942 HH12 ARG X 307     164.286 136.153 218.330  1.00  0.00           H
ATOM   4943  NH2 ARG X 307     162.140 137.088 218.718  1.00  0.00           N
ATOM   4944 HH21 ARG X 307     161.213 137.404 218.965  1.00  0.00           H
ATOM   4945 HH22 ARG X 307     162.374 136.790 217.782  1.00  0.00           H
ATOM   4946  C   ARG X 307     159.582 134.720 224.494  1.00  0.00           C
ATOM   4947  O   ARG X 307     158.602 135.463 224.661  1.00  0.00           O
ATOM   4948  N   TYR X 308     159.483 133.483 224.083  1.00  0.00           N
ATOM   4949  H   TYR X 308     160.258 132.846 223.973  1.00  0.00           H
ATOM   4950  CA  TYR X 308     158.214 132.857 223.834  1.00  0.00           C
ATOM   4951  HA  TYR X 308     157.559 133.554 223.311  1.00  0.00           H
ATOM   4952  CB  TYR X 308     158.572 131.647 222.980  1.00  0.00           C
ATOM   4953  HB2 TYR X 308     159.581 131.724 222.574  1.00  0.00           H
ATOM   4954  HB3 TYR X 308     158.715 130.799 223.650  1.00  0.00           H
ATOM   4955  CG  TYR X 308     157.630 131.195 221.919  1.00  0.00           C
ATOM   4956  CD1 TYR X 308     156.213 131.246 222.117  1.00  0.00           C
ATOM   4957  HD1 TYR X 308     155.788 131.657 223.021  1.00  0.00           H
ATOM   4958  CE1 TYR X 308     155.335 130.904 221.106  1.00  0.00           C
ATOM   4959  HE1 TYR X 308     154.272 130.803 221.263  1.00  0.00           H
ATOM   4960  CZ  TYR X 308     155.836 130.600 219.858  1.00  0.00           C
ATOM   4961  OH  TYR X 308     155.011 130.183 218.879  1.00  0.00           O
ATOM   4962  HH  TYR X 308     154.111 130.510 218.952  1.00  0.00           H
ATOM   4963  CE2 TYR X 308     157.208 130.516 219.673  1.00  0.00           C
ATOM   4964  HE2 TYR X 308     157.543 130.132 218.721  1.00  0.00           H
ATOM   4965  CD2 TYR X 308     158.130 130.807 220.684  1.00  0.00           C
ATOM   4966  HD2 TYR X 308     159.193 130.782 220.492  1.00  0.00           H
ATOM   4967  C   TYR X 308     157.552 132.336 225.205  1.00  0.00           C
ATOM   4968  O   TYR X 308     156.349 132.623 225.484  1.00  0.00           O
ATOM   4969  N   ALA X 309     158.389 131.884 226.132  1.00  0.00           N
ATOM   4970  H   ALA X 309     159.357 131.838 225.846  1.00  0.00           H
ATOM   4971  CA  ALA X 309     157.971 131.545 227.463  1.00  0.00           C
ATOM   4972  HA  ALA X 309     157.431 130.598 227.455  1.00  0.00           H
ATOM   4973  CB  ALA X 309     159.134 131.334 228.389  1.00  0.00           C
ATOM   4974  HB1 ALA X 309     158.771 131.136 229.398  1.00  0.00           H
ATOM   4975  HB2 ALA X 309     159.820 132.179 228.443  1.00  0.00           H
ATOM   4976  HB3 ALA X 309     159.624 130.435 228.017  1.00  0.00           H
ATOM   4977  C   ALA X 309     157.162 132.635 228.205  1.00  0.00           C
ATOM   4978  O   ALA X 309     156.148 132.389 228.786  1.00  0.00           O
ATOM   4979  N   LEU X 310     157.676 133.915 228.164  1.00  0.00           N
ATOM   4980  H   LEU X 310     158.637 134.061 227.891  1.00  0.00           H
ATOM   4981  CA  LEU X 310     157.030 134.964 228.856  1.00  0.00           C
ATOM   4982  HA  LEU X 310     156.576 134.625 229.787  1.00  0.00           H
ATOM   4983  CB  LEU X 310     158.086 136.037 229.205  1.00  0.00           C
ATOM   4984  HB2 LEU X 310     158.672 136.272 228.317  1.00  0.00           H
ATOM   4985  HB3 LEU X 310     157.640 136.916 229.671  1.00  0.00           H
ATOM   4986  CG  LEU X 310     159.244 135.558 230.129  1.00  0.00           C
ATOM   4987  HG  LEU X 310     159.616 134.562 229.888  1.00  0.00           H
ATOM   4988  CD1 LEU X 310     160.450 136.565 230.052  1.00  0.00           C
ATOM   4989 HD11 LEU X 310     160.168 137.610 230.176  1.00  0.00           H
ATOM   4990 HD12 LEU X 310     161.011 136.529 229.118  1.00  0.00           H
ATOM   4991 HD13 LEU X 310     161.275 136.299 230.712  1.00  0.00           H
ATOM   4992  CD2 LEU X 310     158.811 135.383 231.548  1.00  0.00           C
ATOM   4993 HD21 LEU X 310     159.719 135.178 232.114  1.00  0.00           H
ATOM   4994 HD22 LEU X 310     158.275 136.255 231.925  1.00  0.00           H
ATOM   4995 HD23 LEU X 310     158.144 134.521 231.542  1.00  0.00           H
ATOM   4996  C   LEU X 310     155.849 135.594 228.087  1.00  0.00           C
ATOM   4997  O   LEU X 310     154.896 136.063 228.728  1.00  0.00           O
ATOM   4998  N   LEU X 311     155.858 135.434 226.721  1.00  0.00           N
ATOM   4999  H   LEU X 311     156.713 134.926 226.544  1.00  0.00           H
ATOM   5000  CA  LEU X 311     154.678 135.600 225.878  1.00  0.00           C
ATOM   5001  HA  LEU X 311     154.389 136.640 226.032  1.00  0.00           H
ATOM   5002  CB  LEU X 311     155.156 135.478 224.389  1.00  0.00           C
ATOM   5003  HB2 LEU X 311     155.873 136.284 224.233  1.00  0.00           H
ATOM   5004  HB3 LEU X 311     155.706 134.538 224.348  1.00  0.00           H
ATOM   5005  CG  LEU X 311     154.114 135.492 223.272  1.00  0.00           C
ATOM   5006  HG  LEU X 311     153.508 134.595 223.397  1.00  0.00           H
ATOM   5007  CD1 LEU X 311     153.261 136.766 223.332  1.00  0.00           C
ATOM   5008 HD11 LEU X 311     153.885 137.634 223.542  1.00  0.00           H
ATOM   5009 HD12 LEU X 311     152.412 136.637 224.003  1.00  0.00           H
ATOM   5010 HD13 LEU X 311     152.858 136.785 222.319  1.00  0.00           H
ATOM   5011  CD2 LEU X 311     154.906 135.375 221.933  1.00  0.00           C
ATOM   5012 HD21 LEU X 311     155.466 136.292 221.751  1.00  0.00           H
ATOM   5013 HD22 LEU X 311     155.569 134.510 221.931  1.00  0.00           H
ATOM   5014 HD23 LEU X 311     154.236 135.254 221.082  1.00  0.00           H
ATOM   5015  C   LEU X 311     153.519 134.646 226.161  1.00  0.00           C
ATOM   5016  O   LEU X 311     152.343 135.052 226.230  1.00  0.00           O
ATOM   5017  N   LEU X 312     153.874 133.340 226.301  1.00  0.00           N
ATOM   5018  H   LEU X 312     154.842 133.055 226.248  1.00  0.00           H
ATOM   5019  CA  LEU X 312     152.949 132.265 226.753  1.00  0.00           C
ATOM   5020  HA  LEU X 312     152.102 132.304 226.068  1.00  0.00           H
ATOM   5021  CB  LEU X 312     153.605 130.914 226.535  1.00  0.00           C
ATOM   5022  HB2 LEU X 312     154.668 130.857 226.768  1.00  0.00           H
ATOM   5023  HB3 LEU X 312     153.074 130.113 227.051  1.00  0.00           H
ATOM   5024  CG  LEU X 312     153.672 130.410 225.135  1.00  0.00           C
ATOM   5025  HG  LEU X 312     154.065 131.240 224.548  1.00  0.00           H
ATOM   5026  CD1 LEU X 312     154.641 129.250 225.080  1.00  0.00           C
ATOM   5027 HD11 LEU X 312     154.664 128.968 224.028  1.00  0.00           H
ATOM   5028 HD12 LEU X 312     154.157 128.408 225.575  1.00  0.00           H
ATOM   5029 HD13 LEU X 312     155.623 129.491 225.488  1.00  0.00           H
ATOM   5030  CD2 LEU X 312     152.293 129.999 224.507  1.00  0.00           C
ATOM   5031 HD21 LEU X 312     151.638 130.868 224.454  1.00  0.00           H
ATOM   5032 HD22 LEU X 312     152.527 129.696 223.486  1.00  0.00           H
ATOM   5033 HD23 LEU X 312     151.830 129.190 225.073  1.00  0.00           H
ATOM   5034  C   LEU X 312     152.459 132.424 228.127  1.00  0.00           C
ATOM   5035  O   LEU X 312     151.312 132.016 228.289  1.00  0.00           O
ATOM   5036  N   LEU X 313     153.169 133.000 229.080  1.00  0.00           N
ATOM   5037  H   LEU X 313     154.146 133.104 228.846  1.00  0.00           H
ATOM   5038  CA  LEU X 313     152.660 133.336 230.431  1.00  0.00           C
ATOM   5039  HA  LEU X 313     152.019 132.548 230.826  1.00  0.00           H
ATOM   5040  CB  LEU X 313     153.924 133.312 231.434  1.00  0.00           C
ATOM   5041  HB2 LEU X 313     154.691 133.939 230.980  1.00  0.00           H
ATOM   5042  HB3 LEU X 313     153.858 133.639 232.472  1.00  0.00           H
ATOM   5043  CG  LEU X 313     154.497 131.837 231.513  1.00  0.00           C
ATOM   5044  HG  LEU X 313     154.622 131.396 230.525  1.00  0.00           H
ATOM   5045  CD1 LEU X 313     155.820 131.827 232.215  1.00  0.00           C
ATOM   5046 HD11 LEU X 313     156.000 130.795 232.519  1.00  0.00           H
ATOM   5047 HD12 LEU X 313     155.928 132.495 233.069  1.00  0.00           H
ATOM   5048 HD13 LEU X 313     156.589 131.953 231.452  1.00  0.00           H
ATOM   5049  CD2 LEU X 313     153.628 130.839 232.281  1.00  0.00           C
ATOM   5050 HD21 LEU X 313     154.150 129.886 232.187  1.00  0.00           H
ATOM   5051 HD22 LEU X 313     153.589 131.029 233.354  1.00  0.00           H
ATOM   5052 HD23 LEU X 313     152.657 130.788 231.788  1.00  0.00           H
ATOM   5053  C   LEU X 313     151.920 134.632 230.567  1.00  0.00           C
ATOM   5054  O   LEU X 313     150.933 134.748 231.266  1.00  0.00           O
ATOM   5055  N   LEU X 314     152.281 135.616 229.722  1.00  0.00           N
ATOM   5056  H   LEU X 314     153.051 135.413 229.100  1.00  0.00           H
ATOM   5057  CA  LEU X 314     151.386 136.803 229.462  1.00  0.00           C
ATOM   5058  HA  LEU X 314     151.203 137.377 230.370  1.00  0.00           H
ATOM   5059  CB  LEU X 314     152.086 137.757 228.447  1.00  0.00           C
ATOM   5060  HB2 LEU X 314     152.912 138.181 229.019  1.00  0.00           H
ATOM   5061  HB3 LEU X 314     152.544 137.232 227.609  1.00  0.00           H
ATOM   5062  CG  LEU X 314     151.174 138.893 227.955  1.00  0.00           C
[truncated: 6,517,268 more chars]
