# Supplementary material for: Differing Membrane Interactions of Two Highly Similar Drug-Metabolizing Cytochrome P450 Isoforms: CYP 2C9 and CYP 2C19
Source: Int J Mol Sci. 2019 Sep 4;20(18):4328. doi: 10.3390/ijms20184328 (PMC6770661; doi:10.3390/ijms20184328)
Supplement: Supplementary file 1 [file ijms-20-04328-s001.zip › CYP_2C9_2C19_pdb/2C9_SIM1_min_noW.pdb]

REMARK  default_name                                                
ATOM      1  N   MET     1     138.143 141.445 165.666  1.00  0.00           N
ATOM      2  H1  MET     1     138.667 140.987 164.925  1.00  0.00           H
ATOM      3  H2  MET     1     138.225 142.441 165.482  1.00  0.00           H
ATOM      4  H3  MET     1     138.616 141.235 166.532  1.00  0.00           H
ATOM      5  CA  MET     1     136.742 140.979 165.703  1.00  0.00           C
ATOM      6  HA  MET     1     136.180 141.689 166.304  1.00  0.00           H
ATOM      7  CB  MET     1     136.090 140.930 164.303  1.00  0.00           C
ATOM      8  HB2 MET     1     135.245 140.242 164.313  1.00  0.00           H
ATOM      9  HB3 MET     1     135.693 141.917 164.099  1.00  0.00           H
ATOM     10  CG  MET     1     136.996 140.597 163.109  1.00  0.00           C
ATOM     11  HG2 MET     1     136.383 140.595 162.208  1.00  0.00           H
ATOM     12  HG3 MET     1     137.725 141.401 162.995  1.00  0.00           H
ATOM     13  SD  MET     1     137.901 139.034 163.177  1.00  0.00           S
ATOM     14  CE  MET     1     136.556 137.833 163.021  1.00  0.00           C
ATOM     15  HE1 MET     1     135.860 137.937 163.854  1.00  0.00           H
ATOM     16  HE2 MET     1     136.037 137.984 162.077  1.00  0.00           H
ATOM     17  HE3 MET     1     136.971 136.825 163.040  1.00  0.00           H
ATOM     18  C   MET     1     136.661 139.645 166.447  1.00  0.00           C
ATOM     19  O   MET     1     137.694 139.041 166.694  1.00  0.00           O
ATOM     20  N   ASP     2     135.499 139.193 166.919  1.00  0.00           N
ATOM     21  H   ASP     2     135.531 138.253 167.295  1.00  0.00           H
ATOM     22  CA  ASP     2     134.290 139.976 167.228  1.00  0.00           C
ATOM     23  HA  ASP     2     134.379 140.986 166.831  1.00  0.00           H
ATOM     24  CB  ASP     2     133.053 139.356 166.561  1.00  0.00           C
ATOM     25  HB2 ASP     2     133.228 139.344 165.489  1.00  0.00           H
ATOM     26  HB3 ASP     2     132.937 138.326 166.903  1.00  0.00           H
ATOM     27  CG  ASP     2     131.753 140.129 166.841  1.00  0.00           C
ATOM     28  OD1 ASP     2     131.825 141.246 167.405  1.00  0.00           O
ATOM     29  OD2 ASP     2     130.676 139.596 166.503  1.00  0.00           O
ATOM     30  C   ASP     2     134.095 140.094 168.750  1.00  0.00           C
ATOM     31  O   ASP     2     133.995 139.095 169.465  1.00  0.00           O
ATOM     32  N   SER     3     134.025 141.329 169.248  1.00  0.00           N
ATOM     33  H   SER     3     134.011 142.112 168.601  1.00  0.00           H
ATOM     34  CA  SER     3     133.799 141.617 170.661  1.00  0.00           C
ATOM     35  HA  SER     3     134.416 140.938 171.251  1.00  0.00           H
ATOM     36  CB  SER     3     134.250 143.047 170.957  1.00  0.00           C
ATOM     37  HB2 SER     3     135.236 143.219 170.524  1.00  0.00           H
ATOM     38  HB3 SER     3     133.539 143.752 170.524  1.00  0.00           H
ATOM     39  OG  SER     3     134.318 143.249 172.347  1.00  0.00           O
ATOM     40  HG  SER     3     133.506 142.898 172.735  1.00  0.00           H
ATOM     41  C   SER     3     132.342 141.438 171.110  1.00  0.00           C
ATOM     42  O   SER     3     132.113 141.372 172.318  1.00  0.00           O
ATOM     43  N   LEU     4     131.355 141.380 170.203  1.00  0.00           N
ATOM     44  H   LEU     4     131.599 141.415 169.210  1.00  0.00           H
ATOM     45  CA  LEU     4     129.930 141.271 170.554  1.00  0.00           C
ATOM     46  HA  LEU     4     129.662 142.108 171.199  1.00  0.00           H
ATOM     47  CB  LEU     4     129.048 141.307 169.287  1.00  0.00           C
ATOM     48  HB2 LEU     4     129.451 140.593 168.569  1.00  0.00           H
ATOM     49  HB3 LEU     4     128.041 140.971 169.540  1.00  0.00           H
ATOM     50  CG  LEU     4     128.945 142.686 168.618  1.00  0.00           C
ATOM     51  HG  LEU     4     129.925 143.157 168.603  1.00  0.00           H
ATOM     52  CD1 LEU     4     128.444 142.558 167.182  1.00  0.00           C
ATOM     53 HD11 LEU     4     129.169 141.971 166.613  1.00  0.00           H
ATOM     54 HD12 LEU     4     128.367 143.545 166.728  1.00  0.00           H
ATOM     55 HD13 LEU     4     127.477 142.056 167.161  1.00  0.00           H
ATOM     56  CD2 LEU     4     127.961 143.588 169.372  1.00  0.00           C
ATOM     57 HD21 LEU     4     127.931 144.569 168.899  1.00  0.00           H
ATOM     58 HD22 LEU     4     128.279 143.705 170.406  1.00  0.00           H
ATOM     59 HD23 LEU     4     126.964 143.151 169.354  1.00  0.00           H
ATOM     60  C   LEU     4     129.644 139.993 171.346  1.00  0.00           C
ATOM     61  O   LEU     4     129.177 140.070 172.483  1.00  0.00           O
ATOM     62  N   VAL     5     129.957 138.827 170.770  1.00  0.00           N
ATOM     63  H   VAL     5     130.335 138.854 169.831  1.00  0.00           H
ATOM     64  CA  VAL     5     129.657 137.513 171.372  1.00  0.00           C
ATOM     65  HA  VAL     5     128.588 137.475 171.578  1.00  0.00           H
ATOM     66  CB  VAL     5     129.981 136.354 170.402  1.00  0.00           C
ATOM     67  HB  VAL     5     131.061 136.210 170.369  1.00  0.00           H
ATOM     68  CG1 VAL     5     129.320 135.053 170.877  1.00  0.00           C
ATOM     69 HG11 VAL     5     129.615 134.816 171.896  1.00  0.00           H
ATOM     70 HG12 VAL     5     128.235 135.147 170.837  1.00  0.00           H
ATOM     71 HG13 VAL     5     129.626 134.229 170.228  1.00  0.00           H
ATOM     72  CG2 VAL     5     129.489 136.617 168.971  1.00  0.00           C
ATOM     73 HG21 VAL     5     128.425 136.853 168.972  1.00  0.00           H
ATOM     74 HG22 VAL     5     129.653 135.729 168.357  1.00  0.00           H
ATOM     75 HG23 VAL     5     130.043 137.437 168.513  1.00  0.00           H
ATOM     76  C   VAL     5     130.398 137.330 172.705  1.00  0.00           C
ATOM     77  O   VAL     5     129.844 136.807 173.674  1.00  0.00           O
ATOM     78  N   VAL     6     131.637 137.826 172.787  1.00  0.00           N
ATOM     79  H   VAL     6     132.031 138.247 171.956  1.00  0.00           H
ATOM     80  CA  VAL     6     132.459 137.787 174.008  1.00  0.00           C
ATOM     81  HA  VAL     6     132.457 136.766 174.389  1.00  0.00           H
ATOM     82  CB  VAL     6     133.919 138.184 173.702  1.00  0.00           C
ATOM     83  HB  VAL     6     133.954 139.238 173.422  1.00  0.00           H
ATOM     84  CG1 VAL     6     134.811 137.967 174.928  1.00  0.00           C
ATOM     85 HG11 VAL     6     134.730 136.933 175.261  1.00  0.00           H
ATOM     86 HG12 VAL     6     135.849 138.173 174.669  1.00  0.00           H
ATOM     87 HG13 VAL     6     134.517 138.634 175.738  1.00  0.00           H
ATOM     88  CG2 VAL     6     134.524 137.364 172.556  1.00  0.00           C
ATOM     89 HG21 VAL     6     134.528 136.304 172.806  1.00  0.00           H
ATOM     90 HG22 VAL     6     135.546 137.695 172.368  1.00  0.00           H
ATOM     91 HG23 VAL     6     133.960 137.512 171.636  1.00  0.00           H
ATOM     92  C   VAL     6     131.880 138.687 175.106  1.00  0.00           C
ATOM     93  O   VAL     6     131.795 138.277 176.269  1.00  0.00           O
ATOM     94  N   LEU     7     131.455 139.909 174.759  1.00  0.00           N
ATOM     95  H   LEU     7     131.531 140.203 173.789  1.00  0.00           H
ATOM     96  CA  LEU     7     130.905 140.853 175.729  1.00  0.00           C
ATOM     97  HA  LEU     7     131.528 140.810 176.613  1.00  0.00           H
ATOM     98  CB  LEU     7     130.969 142.300 175.221  1.00  0.00           C
ATOM     99  HB2 LEU     7     130.537 142.343 174.220  1.00  0.00           H
ATOM    100  HB3 LEU     7     130.358 142.920 175.875  1.00  0.00           H
ATOM    101  CG  LEU     7     132.398 142.882 175.208  1.00  0.00           C
ATOM    102  HG  LEU     7     133.065 142.217 174.661  1.00  0.00           H
ATOM    103  CD1 LEU     7     132.385 144.237 174.512  1.00  0.00           C
ATOM    104 HD11 LEU     7     132.012 144.115 173.497  1.00  0.00           H
ATOM    105 HD12 LEU     7     133.397 144.638 174.462  1.00  0.00           H
ATOM    106 HD13 LEU     7     131.752 144.935 175.057  1.00  0.00           H
ATOM    107  CD2 LEU     7     132.976 143.112 176.608  1.00  0.00           C
ATOM    108 HD21 LEU     7     132.296 143.719 177.204  1.00  0.00           H
ATOM    109 HD22 LEU     7     133.147 142.161 177.106  1.00  0.00           H
ATOM    110 HD23 LEU     7     133.938 143.620 176.530  1.00  0.00           H
ATOM    111  C   LEU     7     129.507 140.464 176.212  1.00  0.00           C
ATOM    112  O   LEU     7     129.285 140.535 177.415  1.00  0.00           O
ATOM    113  N   VAL     8     128.583 139.986 175.369  1.00  0.00           N
ATOM    114  H   VAL     8     128.791 139.941 174.374  1.00  0.00           H
ATOM    115  CA  VAL     8     127.263 139.532 175.870  1.00  0.00           C
ATOM    116  HA  VAL     8     126.824 140.355 176.433  1.00  0.00           H
ATOM    117  CB  VAL     8     126.266 139.181 174.747  1.00  0.00           C
ATOM    118  HB  VAL     8     125.332 138.868 175.217  1.00  0.00           H
ATOM    119  CG1 VAL     8     125.943 140.406 173.885  1.00  0.00           C
ATOM    120 HG11 VAL     8     126.835 140.762 173.371  1.00  0.00           H
ATOM    121 HG12 VAL     8     125.187 140.147 173.143  1.00  0.00           H
ATOM    122 HG13 VAL     8     125.551 141.202 174.514  1.00  0.00           H
ATOM    123  CG2 VAL     8     126.733 138.037 173.846  1.00  0.00           C
ATOM    124 HG21 VAL     8     126.040 137.909 173.018  1.00  0.00           H
ATOM    125 HG22 VAL     8     126.785 137.103 174.403  1.00  0.00           H
ATOM    126 HG23 VAL     8     127.711 138.267 173.440  1.00  0.00           H
ATOM    127  C   VAL     8     127.398 138.368 176.862  1.00  0.00           C
ATOM    128  O   VAL     8     126.704 138.355 177.880  1.00  0.00           O
ATOM    129  N   LEU     9     128.343 137.445 176.636  1.00  0.00           N
ATOM    130  H   LEU     9     128.876 137.505 175.776  1.00  0.00           H
ATOM    131  CA  LEU     9     128.638 136.345 177.558  1.00  0.00           C
ATOM    132  HA  LEU     9     127.699 135.836 177.782  1.00  0.00           H
ATOM    133  CB  LEU     9     129.565 135.341 176.837  1.00  0.00           C
ATOM    134  HB2 LEU     9     129.033 134.996 175.948  1.00  0.00           H
ATOM    135  HB3 LEU     9     130.452 135.865 176.480  1.00  0.00           H
ATOM    136  CG  LEU     9     130.022 134.079 177.603  1.00  0.00           C
ATOM    137  HG  LEU     9     130.379 133.373 176.854  1.00  0.00           H
ATOM    138  CD1 LEU     9     131.191 134.323 178.562  1.00  0.00           C
ATOM    139 HD11 LEU     9     131.981 134.872 178.048  1.00  0.00           H
ATOM    140 HD12 LEU     9     131.591 133.363 178.885  1.00  0.00           H
ATOM    141 HD13 LEU     9     130.870 134.878 179.440  1.00  0.00           H
ATOM    142  CD2 LEU     9     128.891 133.395 178.374  1.00  0.00           C
ATOM    143 HD21 LEU     9     128.581 134.000 179.225  1.00  0.00           H
ATOM    144 HD22 LEU     9     128.037 133.245 177.715  1.00  0.00           H
ATOM    145 HD23 LEU     9     129.233 132.426 178.736  1.00  0.00           H
ATOM    146  C   LEU     9     129.194 136.858 178.896  1.00  0.00           C
ATOM    147  O   LEU     9     128.652 136.535 179.957  1.00  0.00           O
ATOM    148  N   CYS    10     130.251 137.678 178.886  1.00  0.00           N
ATOM    149  H   CYS    10     130.669 137.946 178.001  1.00  0.00           H
ATOM    150  CA  CYS    10     130.835 138.148 180.145  1.00  0.00           C
ATOM    151  HA  CYS    10     130.869 137.292 180.820  1.00  0.00           H
ATOM    152  CB  CYS    10     132.296 138.571 179.957  1.00  0.00           C
ATOM    153  HB2 CYS    10     132.729 138.776 180.938  1.00  0.00           H
ATOM    154  HB3 CYS    10     132.854 137.757 179.493  1.00  0.00           H
ATOM    155  SG  CYS    10     132.446 140.055 178.943  1.00  0.00           S
ATOM    156  HG  CYS    10     132.196 139.455 177.765  1.00  0.00           H
ATOM    157  C   CYS    10     129.964 139.195 180.867  1.00  0.00           C
ATOM    158  O   CYS    10     129.921 139.167 182.094  1.00  0.00           O
ATOM    159  N   LEU    11     129.183 140.035 180.176  1.00  0.00           N
ATOM    160  H   LEU    11     129.267 140.060 179.163  1.00  0.00           H
ATOM    161  CA  LEU    11     128.181 140.905 180.815  1.00  0.00           C
ATOM    162  HA  LEU    11     128.662 141.412 181.647  1.00  0.00           H
ATOM    163  CB  LEU    11     127.659 141.979 179.836  1.00  0.00           C
ATOM    164  HB2 LEU    11     127.559 141.548 178.842  1.00  0.00           H
ATOM    165  HB3 LEU    11     126.649 142.255 180.142  1.00  0.00           H
ATOM    166  CG  LEU    11     128.473 143.290 179.751  1.00  0.00           C
ATOM    167  HG  LEU    11     128.056 143.883 178.936  1.00  0.00           H
ATOM    168  CD1 LEU    11     128.326 144.111 181.034  1.00  0.00           C
ATOM    169 HD11 LEU    11     127.269 144.275 181.246  1.00  0.00           H
ATOM    170 HD12 LEU    11     128.809 145.078 180.902  1.00  0.00           H
ATOM    171 HD13 LEU    11     128.789 143.599 181.875  1.00  0.00           H
ATOM    172  CD2 LEU    11     129.971 143.121 179.485  1.00  0.00           C
ATOM    173 HD21 LEU    11     130.448 142.565 180.291  1.00  0.00           H
ATOM    174 HD22 LEU    11     130.120 142.590 178.548  1.00  0.00           H
ATOM    175 HD23 LEU    11     130.443 144.100 179.398  1.00  0.00           H
ATOM    176  C   LEU    11     127.026 140.088 181.420  1.00  0.00           C
ATOM    177  O   LEU    11     126.580 140.406 182.523  1.00  0.00           O
ATOM    178  N   SER    12     126.601 138.983 180.796  1.00  0.00           N
ATOM    179  H   SER    12     126.937 138.774 179.859  1.00  0.00           H
ATOM    180  CA  SER    12     125.701 138.026 181.458  1.00  0.00           C
ATOM    181  HA  SER    12     124.798 138.559 181.759  1.00  0.00           H
ATOM    182  CB  SER    12     125.278 136.913 180.491  1.00  0.00           C
ATOM    183  HB2 SER    12     124.863 137.363 179.588  1.00  0.00           H
ATOM    184  HB3 SER    12     126.140 136.305 180.215  1.00  0.00           H
ATOM    185  OG  SER    12     124.288 136.094 181.087  1.00  0.00           O
ATOM    186  HG  SER    12     124.664 135.625 181.836  1.00  0.00           H
ATOM    187  C   SER    12     126.340 137.444 182.730  1.00  0.00           C
ATOM    188  O   SER    12     125.657 137.260 183.736  1.00  0.00           O
ATOM    189  N   CYS    13     127.659 137.213 182.739  1.00  0.00           N
ATOM    190  H   CYS    13     128.173 137.341 181.875  1.00  0.00           H
ATOM    191  CA  CYS    13     128.391 136.829 183.950  1.00  0.00           C
ATOM    192  HA  CYS    13     127.820 136.028 184.420  1.00  0.00           H
ATOM    193  CB  CYS    13     129.754 136.211 183.566  1.00  0.00           C
ATOM    194  HB2 CYS    13     129.824 135.230 184.039  1.00  0.00           H
ATOM    195  HB3 CYS    13     129.805 136.052 182.487  1.00  0.00           H
ATOM    196  SG  CYS    13     131.193 137.186 184.106  1.00  0.00           S
ATOM    197  HG  CYS    13     130.951 138.254 183.327  1.00  0.00           H
ATOM    198  C   CYS    13     128.450 137.956 185.008  1.00  0.00           C
ATOM    199  O   CYS    13     128.306 137.660 186.192  1.00  0.00           O
ATOM    200  N   LEU    14     128.567 139.237 184.622  1.00  0.00           N
ATOM    201  H   LEU    14     128.719 139.422 183.636  1.00  0.00           H
ATOM    202  CA  LEU    14     128.492 140.379 185.552  1.00  0.00           C
ATOM    203  HA  LEU    14     129.281 140.271 186.294  1.00  0.00           H
ATOM    204  CB  LEU    14     128.667 141.724 184.800  1.00  0.00           C
ATOM    205  HB2 LEU    14     128.264 141.634 183.797  1.00  0.00           H
ATOM    206  HB3 LEU    14     128.050 142.471 185.300  1.00  0.00           H
ATOM    207  CG  LEU    14     130.081 142.327 184.689  1.00  0.00           C
ATOM    208  HG  LEU    14     130.000 143.240 184.102  1.00  0.00           H
ATOM    209  CD1 LEU    14     130.611 142.720 186.065  1.00  0.00           C
ATOM    210 HD11 LEU    14     129.910 143.408 186.538  1.00  0.00           H
ATOM    211 HD12 LEU    14     131.573 143.219 185.959  1.00  0.00           H
ATOM    212 HD13 LEU    14     130.739 141.841 186.686  1.00  0.00           H
ATOM    213  CD2 LEU    14     131.102 141.437 183.987  1.00  0.00           C
ATOM    214 HD21 LEU    14     131.140 140.451 184.443  1.00  0.00           H
ATOM    215 HD22 LEU    14     130.826 141.342 182.939  1.00  0.00           H
ATOM    216 HD23 LEU    14     132.090 141.895 184.032  1.00  0.00           H
ATOM    217  C   LEU    14     127.162 140.378 186.327  1.00  0.00           C
ATOM    218  O   LEU    14     127.166 140.569 187.549  1.00  0.00           O
ATOM    219  N   LEU    15     126.043 140.112 185.643  1.00  0.00           N
ATOM    220  H   LEU    15     126.115 139.999 184.636  1.00  0.00           H
ATOM    221  CA  LEU    15     124.740 139.903 186.282  1.00  0.00           C
ATOM    222  HA  LEU    15     124.532 140.744 186.946  1.00  0.00           H
ATOM    223  CB  LEU    15     123.611 139.826 185.229  1.00  0.00           C
ATOM    224  HB2 LEU    15     123.937 139.243 184.366  1.00  0.00           H
ATOM    225  HB3 LEU    15     122.780 139.287 185.686  1.00  0.00           H
ATOM    226  CG  LEU    15     123.065 141.190 184.763  1.00  0.00           C
ATOM    227  HG  LEU    15     122.902 141.825 185.633  1.00  0.00           H
ATOM    228  CD1 LEU    15     123.993 141.910 183.786  1.00  0.00           C
ATOM    229 HD11 LEU    15     124.955 142.108 184.252  1.00  0.00           H
ATOM    230 HD12 LEU    15     123.552 142.860 183.488  1.00  0.00           H
ATOM    231 HD13 LEU    15     124.145 141.299 182.896  1.00  0.00           H
ATOM    232  CD2 LEU    15     121.719 140.996 184.061  1.00  0.00           C
ATOM    233 HD21 LEU    15     121.841 140.353 183.188  1.00  0.00           H
ATOM    234 HD22 LEU    15     121.006 140.539 184.747  1.00  0.00           H
ATOM    235 HD23 LEU    15     121.325 141.961 183.744  1.00  0.00           H
ATOM    236  C   LEU    15     124.762 138.645 187.167  1.00  0.00           C
ATOM    237  O   LEU    15     124.561 138.748 188.373  1.00  0.00           O
ATOM    238  N   LEU    16     125.035 137.464 186.604  1.00  0.00           N
ATOM    239  H   LEU    16     125.229 137.445 185.607  1.00  0.00           H
ATOM    240  CA  LEU    16     124.905 136.184 187.318  1.00  0.00           C
ATOM    241  HA  LEU    16     123.876 136.091 187.667  1.00  0.00           H
ATOM    242  CB  LEU    16     125.202 135.028 186.344  1.00  0.00           C
ATOM    243  HB2 LEU    16     126.167 135.220 185.873  1.00  0.00           H
ATOM    244  HB3 LEU    16     125.292 134.098 186.907  1.00  0.00           H
ATOM    245  CG  LEU    16     124.130 134.838 185.250  1.00  0.00           C
ATOM    246  HG  LEU    16     123.835 135.803 184.841  1.00  0.00           H
ATOM    247  CD1 LEU    16     124.687 133.985 184.110  1.00  0.00           C
ATOM    248 HD11 LEU    16     125.553 134.478 183.669  1.00  0.00           H
ATOM    249 HD12 LEU    16     123.924 133.854 183.342  1.00  0.00           H
ATOM    250 HD13 LEU    16     124.987 133.011 184.489  1.00  0.00           H
ATOM    251  CD2 LEU    16     122.879 134.151 185.799  1.00  0.00           C
ATOM    252 HD21 LEU    16     123.133 133.173 186.204  1.00  0.00           H
ATOM    253 HD22 LEU    16     122.431 134.760 186.582  1.00  0.00           H
ATOM    254 HD23 LEU    16     122.149 134.027 184.998  1.00  0.00           H
ATOM    255  C   LEU    16     125.787 136.093 188.577  1.00  0.00           C
ATOM    256  O   LEU    16     125.312 135.656 189.626  1.00  0.00           O
ATOM    257  N   LEU    17     127.048 136.536 188.514  1.00  0.00           N
ATOM    258  H   LEU    17     127.386 136.905 187.630  1.00  0.00           H
ATOM    259  CA  LEU    17     127.964 136.508 189.661  1.00  0.00           C
ATOM    260  HA  LEU    17     127.920 135.519 190.115  1.00  0.00           H
ATOM    261  CB  LEU    17     129.411 136.785 189.198  1.00  0.00           C
ATOM    262  HB2 LEU    17     129.391 137.559 188.436  1.00  0.00           H
ATOM    263  HB3 LEU    17     129.963 137.202 190.040  1.00  0.00           H
ATOM    264  CG  LEU    17     130.236 135.588 188.680  1.00  0.00           C
ATOM    265  HG  LEU    17     131.169 135.980 188.277  1.00  0.00           H
ATOM    266  CD1 LEU    17     130.602 134.648 189.826  1.00  0.00           C
ATOM    267 HD11 LEU    17     131.101 135.202 190.620  1.00  0.00           H
ATOM    268 HD12 LEU    17     131.268 133.870 189.454  1.00  0.00           H
ATOM    269 HD13 LEU    17     129.707 134.179 190.221  1.00  0.00           H
ATOM    270  CD2 LEU    17     129.561 134.764 187.583  1.00  0.00           C
ATOM    271 HD21 LEU    17     128.645 134.305 187.953  1.00  0.00           H
ATOM    272 HD22 LEU    17     129.334 135.402 186.733  1.00  0.00           H
ATOM    273 HD23 LEU    17     130.238 133.976 187.251  1.00  0.00           H
ATOM    274  C   LEU    17     127.559 137.507 190.756  1.00  0.00           C
ATOM    275  O   LEU    17     127.720 137.191 191.935  1.00  0.00           O
ATOM    276  N   SER    18     127.046 138.692 190.404  1.00  0.00           N
ATOM    277  H   SER    18     126.854 138.872 189.427  1.00  0.00           H
ATOM    278  CA  SER    18     126.586 139.664 191.409  1.00  0.00           C
ATOM    279  HA  SER    18     127.316 139.693 192.218  1.00  0.00           H
ATOM    280  CB  SER    18     126.517 141.086 190.833  1.00  0.00           C
ATOM    281  HB2 SER    18     126.176 141.763 191.617  1.00  0.00           H
ATOM    282  HB3 SER    18     127.516 141.397 190.526  1.00  0.00           H
ATOM    283  OG  SER    18     125.646 141.197 189.728  1.00  0.00           O
ATOM    284  HG  SER    18     126.118 140.922 188.919  1.00  0.00           H
ATOM    285  C   SER    18     125.257 139.236 192.045  1.00  0.00           C
ATOM    286  O   SER    18     125.168 139.177 193.269  1.00  0.00           O
ATOM    287  N   LEU    19     124.260 138.848 191.244  1.00  0.00           N
ATOM    288  H   LEU    19     124.409 138.924 190.242  1.00  0.00           H
ATOM    289  CA  LEU    19     122.926 138.445 191.709  1.00  0.00           C
ATOM    290  HA  LEU    19     122.499 139.255 192.300  1.00  0.00           H
ATOM    291  CB  LEU    19     122.039 138.190 190.481  1.00  0.00           C
ATOM    292  HB2 LEU    19     122.549 137.465 189.843  1.00  0.00           H
ATOM    293  HB3 LEU    19     121.110 137.738 190.818  1.00  0.00           H
ATOM    294  CG  LEU    19     121.682 139.434 189.648  1.00  0.00           C
ATOM    295  HG  LEU    19     122.566 140.042 189.464  1.00  0.00           H
ATOM    296  CD1 LEU    19     121.108 138.981 188.306  1.00  0.00           C
ATOM    297 HD11 LEU    19     121.856 138.405 187.764  1.00  0.00           H
ATOM    298 HD12 LEU    19     120.835 139.852 187.710  1.00  0.00           H
ATOM    299 HD13 LEU    19     120.232 138.355 188.469  1.00  0.00           H
ATOM    300  CD2 LEU    19     120.631 140.290 190.354  1.00  0.00           C
ATOM    301 HD21 LEU    19     119.751 139.691 190.584  1.00  0.00           H
ATOM    302 HD22 LEU    19     121.041 140.702 191.275  1.00  0.00           H
ATOM    303 HD23 LEU    19     120.337 141.112 189.703  1.00  0.00           H
ATOM    304  C   LEU    19     122.931 137.195 192.608  1.00  0.00           C
ATOM    305  O   LEU    19     122.119 137.099 193.524  1.00  0.00           O
ATOM    306  N   TRP    20     123.849 136.252 192.377  1.00  0.00           N
ATOM    307  H   TRP    20     124.433 136.360 191.556  1.00  0.00           H
ATOM    308  CA  TRP    20     124.062 135.058 193.213  1.00  0.00           C
ATOM    309  HA  TRP    20     123.128 134.497 193.274  1.00  0.00           H
ATOM    310  CB  TRP    20     125.101 134.194 192.460  1.00  0.00           C
ATOM    311  HB2 TRP    20     124.624 133.839 191.546  1.00  0.00           H
ATOM    312  HB3 TRP    20     125.905 134.863 192.151  1.00  0.00           H
ATOM    313  CG  TRP    20     125.794 133.004 193.078  1.00  0.00           C
ATOM    314  CD1 TRP    20     125.494 132.336 194.216  1.00  0.00           C
ATOM    315  HD1 TRP    20     124.653 132.533 194.864  1.00  0.00           H
ATOM    316  NE1 TRP    20     126.470 131.394 194.482  1.00  0.00           N
ATOM    317  HE1 TRP    20     126.490 130.841 195.339  1.00  0.00           H
ATOM    318  CE2 TRP    20     127.427 131.363 193.494  1.00  0.00           C
ATOM    319  CZ2 TRP    20     128.613 130.634 193.318  1.00  0.00           C
ATOM    320  HZ2 TRP    20     128.933 129.919 194.061  1.00  0.00           H
ATOM    321  CH2 TRP    20     129.363 130.817 192.146  1.00  0.00           C
ATOM    322  HH2 TRP    20     130.277 130.252 191.997  1.00  0.00           H
ATOM    323  CZ3 TRP    20     128.898 131.694 191.149  1.00  0.00           C
ATOM    324  HZ3 TRP    20     129.448 131.781 190.220  1.00  0.00           H
ATOM    325  CE3 TRP    20     127.711 132.429 191.339  1.00  0.00           C
ATOM    326  HE3 TRP    20     127.351 133.085 190.557  1.00  0.00           H
ATOM    327  CD2 TRP    20     126.965 132.312 192.535  1.00  0.00           C
ATOM    328  C   TRP    20     124.472 135.413 194.661  1.00  0.00           C
ATOM    329  O   TRP    20     124.171 134.660 195.588  1.00  0.00           O
ATOM    330  N   ARG    21     125.129 136.557 194.903  1.00  0.00           N
ATOM    331  H   ARG    21     125.216 137.233 194.150  1.00  0.00           H
ATOM    332  CA  ARG    21     125.698 136.914 196.216  1.00  0.00           C
ATOM    333  HA  ARG    21     125.796 136.010 196.815  1.00  0.00           H
ATOM    334  CB  ARG    21     127.121 137.478 195.999  1.00  0.00           C
ATOM    335  HB2 ARG    21     127.090 138.232 195.210  1.00  0.00           H
ATOM    336  HB3 ARG    21     127.473 137.953 196.914  1.00  0.00           H
ATOM    337  CG  ARG    21     128.108 136.353 195.622  1.00  0.00           C
ATOM    338  HG2 ARG    21     128.415 135.836 196.531  1.00  0.00           H
ATOM    339  HG3 ARG    21     127.588 135.630 194.996  1.00  0.00           H
ATOM    340  CD  ARG    21     129.365 136.841 194.873  1.00  0.00           C
ATOM    341  HD2 ARG    21     129.068 137.447 194.017  1.00  0.00           H
ATOM    342  HD3 ARG    21     129.946 137.477 195.544  1.00  0.00           H
ATOM    343  NE  ARG    21     130.222 135.719 194.414  1.00  0.00           N
ATOM    344  HE  ARG    21     131.135 135.651 194.857  1.00  0.00           H
ATOM    345  CZ  ARG    21     129.895 134.762 193.561  1.00  0.00           C
ATOM    346  NH1 ARG    21     128.799 134.810 192.871  1.00  0.00           N
ATOM    347 HH11 ARG    21     128.277 135.680 192.844  1.00  0.00           H
ATOM    348 HH12 ARG    21     128.530 134.022 192.313  1.00  0.00           H
ATOM    349  NH2 ARG    21     130.627 133.709 193.345  1.00  0.00           N
ATOM    350 HH21 ARG    21     131.583 133.610 193.689  1.00  0.00           H
ATOM    351 HH22 ARG    21     130.281 132.956 192.775  1.00  0.00           H
ATOM    352  C   ARG    21     124.770 137.852 197.005  1.00  0.00           C
ATOM    353  O   ARG    21     124.652 139.030 196.683  1.00  0.00           O
ATOM    354  N   GLN    22     124.195 137.355 198.110  1.00  0.00           N
ATOM    355  H   GLN    22     124.275 136.360 198.281  1.00  0.00           H
ATOM    356  CA  GLN    22     123.329 138.121 199.031  1.00  0.00           C
ATOM    357  HA  GLN    22     122.445 138.440 198.479  1.00  0.00           H
ATOM    358  CB  GLN    22     122.869 137.228 200.201  1.00  0.00           C
ATOM    359  HB2 GLN    22     123.743 136.740 200.629  1.00  0.00           H
ATOM    360  HB3 GLN    22     122.421 137.850 200.978  1.00  0.00           H
ATOM    361  CG  GLN    22     121.817 136.189 199.766  1.00  0.00           C
ATOM    362  HG2 GLN    22     120.865 136.705 199.672  1.00  0.00           H
ATOM    363  HG3 GLN    22     122.084 135.782 198.790  1.00  0.00           H
ATOM    364  CD  GLN    22     121.593 135.007 200.708  1.00  0.00           C
ATOM    365  OE1 GLN    22     120.795 134.126 200.427  1.00  0.00           O
ATOM    366  NE2 GLN    22     122.221 134.928 201.863  1.00  0.00           N
ATOM    367 HE21 GLN    22     122.028 134.113 202.416  1.00  0.00           H
ATOM    368 HE22 GLN    22     122.907 135.610 202.121  1.00  0.00           H
ATOM    369  C   GLN    22     123.984 139.399 199.588  1.00  0.00           C
ATOM    370  O   GLN    22     123.285 140.314 200.023  1.00  0.00           O
ATOM    371  N   SER    23     125.314 139.500 199.553  1.00  0.00           N
ATOM    372  H   SER    23     125.831 138.704 199.211  1.00  0.00           H
ATOM    373  CA  SER    23     126.046 140.770 199.594  1.00  0.00           C
ATOM    374  HA  SER    23     125.431 141.542 199.128  1.00  0.00           H
ATOM    375  CB  SER    23     126.329 141.213 201.032  1.00  0.00           C
ATOM    376  HB2 SER    23     126.799 140.403 201.591  1.00  0.00           H
ATOM    377  HB3 SER    23     126.997 142.074 201.017  1.00  0.00           H
ATOM    378  OG  SER    23     125.105 141.587 201.639  1.00  0.00           O
ATOM    379  HG  SER    23     124.396 141.047 201.252  1.00  0.00           H
ATOM    380  C   SER    23     127.332 140.655 198.772  1.00  0.00           C
ATOM    381  O   SER    23     128.036 139.642 198.844  1.00  0.00           O
ATOM    382  N   SER    24     127.587 141.682 197.961  1.00  0.00           N
ATOM    383  H   SER    24     127.012 142.507 198.077  1.00  0.00           H
ATOM    384  CA  SER    24     128.778 141.851 197.122  1.00  0.00           C
ATOM    385  HA  SER    24     129.158 140.878 196.814  1.00  0.00           H
ATOM    386  CB  SER    24     128.355 142.623 195.862  1.00  0.00           C
ATOM    387  HB2 SER    24     127.520 142.108 195.385  1.00  0.00           H
ATOM    388  HB3 SER    24     128.042 143.633 196.135  1.00  0.00           H
ATOM    389  OG  SER    24     129.429 142.691 194.950  1.00  0.00           O
ATOM    390  HG  SER    24     129.173 143.243 194.184  1.00  0.00           H
ATOM    391  C   SER    24     129.880 142.555 197.938  1.00  0.00           C
ATOM    392  O   SER    24     129.950 142.368 199.150  1.00  0.00           O
ATOM    393  N   GLY    25     130.714 143.409 197.329  1.00  0.00           N
ATOM    394  H   GLY    25     130.643 143.453 196.317  1.00  0.00           H
ATOM    395  CA  GLY    25     131.689 144.275 198.016  1.00  0.00           C
ATOM    396  HA2 GLY    25     132.522 143.671 198.367  1.00  0.00           H
ATOM    397  HA3 GLY    25     132.076 144.994 197.295  1.00  0.00           H
ATOM    398  C   GLY    25     131.122 145.069 199.210  1.00  0.00           C
ATOM    399  O   GLY    25     131.888 145.415 200.114  1.00  0.00           O
ATOM    400  N   ARG    26     129.803 145.305 199.222  1.00  0.00           N
ATOM    401  H   ARG    26     129.303 144.994 198.397  1.00  0.00           H
ATOM    402  CA  ARG    26     128.926 145.541 200.384  1.00  0.00           C
ATOM    403  HA  ARG    26     129.309 144.960 201.224  1.00  0.00           H
ATOM    404  CB  ARG    26     128.956 147.050 200.734  1.00  0.00           C
ATOM    405  HB2 ARG    26     130.001 147.364 200.748  1.00  0.00           H
ATOM    406  HB3 ARG    26     128.476 147.608 199.929  1.00  0.00           H
ATOM    407  CG  ARG    26     128.345 147.505 202.081  1.00  0.00           C
ATOM    408  HG2 ARG    26     128.639 148.543 202.244  1.00  0.00           H
ATOM    409  HG3 ARG    26     127.257 147.476 202.021  1.00  0.00           H
ATOM    410  CD  ARG    26     128.803 146.669 203.286  1.00  0.00           C
ATOM    411  HD2 ARG    26     128.332 145.689 203.210  1.00  0.00           H
ATOM    412  HD3 ARG    26     129.885 146.541 203.235  1.00  0.00           H
ATOM    413  NE  ARG    26     128.439 147.258 204.595  1.00  0.00           N
ATOM    414  HE  ARG    26     127.782 148.014 204.592  1.00  0.00           H
ATOM    415  CZ  ARG    26     128.863 146.837 205.782  1.00  0.00           C
ATOM    416  NH1 ARG    26     129.686 145.842 205.933  1.00  0.00           N
ATOM    417 HH11 ARG    26     129.896 145.235 205.129  1.00  0.00           H
ATOM    418 HH12 ARG    26     130.000 145.530 206.833  1.00  0.00           H
ATOM    419  NH2 ARG    26     128.453 147.442 206.863  1.00  0.00           N
ATOM    420 HH21 ARG    26     127.771 148.170 206.823  1.00  0.00           H
ATOM    421 HH22 ARG    26     128.714 147.092 207.785  1.00  0.00           H
ATOM    422  C   ARG    26     127.530 144.975 200.025  1.00  0.00           C
ATOM    423  O   ARG    26     127.351 144.404 198.947  1.00  0.00           O
ATOM    424  N   GLY    27     126.494 145.207 200.832  1.00  0.00           N
ATOM    425  H   GLY    27     126.713 145.478 201.777  1.00  0.00           H
ATOM    426  CA  GLY    27     125.091 144.865 200.516  1.00  0.00           C
ATOM    427  HA2 GLY    27     125.032 143.791 200.362  1.00  0.00           H
ATOM    428  HA3 GLY    27     124.472 145.096 201.380  1.00  0.00           H
ATOM    429  C   GLY    27     124.438 145.536 199.282  1.00  0.00           C
ATOM    430  O   GLY    27     123.249 145.335 199.048  1.00  0.00           O
ATOM    431  N   LYS    28     125.193 146.303 198.484  1.00  0.00           N
ATOM    432  H   LYS    28     126.186 146.276 198.676  1.00  0.00           H
ATOM    433  CA  LYS    28     124.838 146.857 197.159  1.00  0.00           C
ATOM    434  HA  LYS    28     123.998 146.301 196.741  1.00  0.00           H
ATOM    435  CB  LYS    28     124.438 148.344 197.277  1.00  0.00           C
ATOM    436  HB2 LYS    28     125.208 148.879 197.834  1.00  0.00           H
ATOM    437  HB3 LYS    28     124.408 148.784 196.283  1.00  0.00           H
ATOM    438  CG  LYS    28     123.060 148.580 197.929  1.00  0.00           C
ATOM    439  HG2 LYS    28     122.292 148.068 197.343  1.00  0.00           H
ATOM    440  HG3 LYS    28     123.081 148.185 198.947  1.00  0.00           H
ATOM    441  CD  LYS    28     122.731 150.085 197.993  1.00  0.00           C
ATOM    442  HD2 LYS    28     123.535 150.601 198.517  1.00  0.00           H
ATOM    443  HD3 LYS    28     122.671 150.512 196.990  1.00  0.00           H
ATOM    444  CE  LYS    28     121.430 150.363 198.754  1.00  0.00           C
ATOM    445  HE2 LYS    28     121.333 149.642 199.569  1.00  0.00           H
ATOM    446  HE3 LYS    28     121.488 151.367 199.190  1.00  0.00           H
ATOM    447  NZ  LYS    28     120.229 150.308 197.891  1.00  0.00           N
ATOM    448  HZ1 LYS    28     119.405 150.088 198.456  1.00  0.00           H
ATOM    449  HZ2 LYS    28     120.297 149.621 197.146  1.00  0.00           H
ATOM    450  HZ3 LYS    28     120.060 151.234 197.491  1.00  0.00           H
ATOM    451  C   LYS    28     126.034 146.663 196.203  1.00  0.00           C
ATOM    452  O   LYS    28     127.097 146.219 196.635  1.00  0.00           O
ATOM    453  N   LEU    29     125.871 146.995 194.917  1.00  0.00           N
ATOM    454  H   LEU    29     124.983 147.378 194.639  1.00  0.00           H
ATOM    455  CA  LEU    29     126.914 146.880 193.883  1.00  0.00           C
ATOM    456  HA  LEU    29     127.108 145.824 193.701  1.00  0.00           H
ATOM    457  CB  LEU    29     126.432 147.541 192.574  1.00  0.00           C
ATOM    458  HB2 LEU    29     126.191 148.587 192.776  1.00  0.00           H
ATOM    459  HB3 LEU    29     127.279 147.538 191.887  1.00  0.00           H
ATOM    460  CG  LEU    29     125.238 146.894 191.834  1.00  0.00           C
ATOM    461  HG  LEU    29     125.462 145.847 191.631  1.00  0.00           H
ATOM    462  CD1 LEU    29     123.902 146.985 192.583  1.00  0.00           C
ATOM    463 HD11 LEU    29     123.886 146.288 193.417  1.00  0.00           H
ATOM    464 HD12 LEU    29     123.082 146.706 191.919  1.00  0.00           H
ATOM    465 HD13 LEU    29     123.732 148.007 192.925  1.00  0.00           H
ATOM    466  CD2 LEU    29     125.054 147.623 190.504  1.00  0.00           C
ATOM    467 HD21 LEU    29     124.863 148.678 190.693  1.00  0.00           H
ATOM    468 HD22 LEU    29     125.949 147.519 189.890  1.00  0.00           H
ATOM    469 HD23 LEU    29     124.206 147.208 189.961  1.00  0.00           H
ATOM    470  C   LEU    29     128.216 147.551 194.375  1.00  0.00           C
ATOM    471  O   LEU    29     128.180 148.735 194.717  1.00  0.00           O
ATOM    472  N   PRO    30     129.332 146.807 194.500  1.00  0.00           N
ATOM    473  CD  PRO    30     130.173 146.982 195.680  1.00  0.00           C
ATOM    474  HD2 PRO    30     130.189 146.045 196.237  1.00  0.00           H
ATOM    475  HD3 PRO    30     129.820 147.783 196.331  1.00  0.00           H
ATOM    476  CG  PRO    30     131.567 147.300 195.164  1.00  0.00           C
ATOM    477  HG2 PRO    30     132.340 147.051 195.892  1.00  0.00           H
ATOM    478  HG3 PRO    30     131.629 148.347 194.863  1.00  0.00           H
ATOM    479  CB  PRO    30     131.624 146.400 193.937  1.00  0.00           C
ATOM    480  HB2 PRO    30     131.854 145.379 194.246  1.00  0.00           H
ATOM    481  HB3 PRO    30     132.376 146.753 193.232  1.00  0.00           H
ATOM    482  CA  PRO    30     130.201 146.472 193.356  1.00  0.00           C
ATOM    483  HA  PRO    30     130.162 147.309 192.657  1.00  0.00           H
ATOM    484  C   PRO    30     129.851 145.177 192.585  1.00  0.00           C
ATOM    485  O   PRO    30     128.957 144.433 192.997  1.00  0.00           O
ATOM    486  N   PRO    31     130.558 144.870 191.475  1.00  0.00           N
ATOM    487  CD  PRO    31     131.497 145.737 190.776  1.00  0.00           C
ATOM    488  HD2 PRO    31     132.491 145.624 191.213  1.00  0.00           H
ATOM    489  HD3 PRO    31     131.184 146.780 190.799  1.00  0.00           H
ATOM    490  CG  PRO    31     131.520 145.230 189.337  1.00  0.00           C
ATOM    491  HG2 PRO    31     132.452 145.485 188.830  1.00  0.00           H
ATOM    492  HG3 PRO    31     130.659 145.614 188.789  1.00  0.00           H
ATOM    493  CB  PRO    31     131.380 143.726 189.544  1.00  0.00           C
ATOM    494  HB2 PRO    31     132.358 143.305 189.783  1.00  0.00           H
ATOM    495  HB3 PRO    31     130.967 143.233 188.669  1.00  0.00           H
ATOM    496  CA  PRO    31     130.438 143.600 190.748  1.00  0.00           C
ATOM    497  HA  PRO    31     129.413 143.499 190.392  1.00  0.00           H
ATOM    498  C   PRO    31     130.812 142.360 191.576  1.00  0.00           C
ATOM    499  O   PRO    31     131.558 142.462 192.544  1.00  0.00           O
ATOM    500  N   GLY    32     130.324 141.188 191.151  1.00  0.00           N
ATOM    501  H   GLY    32     129.726 141.198 190.341  1.00  0.00           H
ATOM    502  CA  GLY    32     130.671 139.876 191.725  1.00  0.00           C
ATOM    503  HA2 GLY    32     130.924 140.007 192.779  1.00  0.00           H
ATOM    504  HA3 GLY    32     129.791 139.236 191.678  1.00  0.00           H
ATOM    505  C   GLY    32     131.840 139.104 191.069  1.00  0.00           C
ATOM    506  O   GLY    32     132.406 138.241 191.739  1.00  0.00           O
ATOM    507  N   PRO    33     132.219 139.329 189.791  1.00  0.00           N
ATOM    508  CD  PRO    33     131.419 139.877 188.708  1.00  0.00           C
ATOM    509  HD2 PRO    33     131.650 140.936 188.600  1.00  0.00           H
ATOM    510  HD3 PRO    33     130.351 139.729 188.871  1.00  0.00           H
ATOM    511  CG  PRO    33     131.866 139.122 187.458  1.00  0.00           C
ATOM    512  HG2 PRO    33     131.697 139.697 186.550  1.00  0.00           H
ATOM    513  HG3 PRO    33     131.360 138.160 187.394  1.00  0.00           H
ATOM    514  CB  PRO    33     133.354 138.901 187.708  1.00  0.00           C
ATOM    515  HB2 PRO    33     133.908 139.768 187.342  1.00  0.00           H
ATOM    516  HB3 PRO    33     133.712 137.995 187.218  1.00  0.00           H
ATOM    517  CA  PRO    33     133.468 138.798 189.237  1.00  0.00           C
ATOM    518  HA  PRO    33     133.563 137.747 189.513  1.00  0.00           H
ATOM    519  C   PRO    33     134.699 139.570 189.730  1.00  0.00           C
ATOM    520  O   PRO    33     134.696 140.800 189.782  1.00  0.00           O
ATOM    521  N   THR    34     135.787 138.854 190.008  1.00  0.00           N
ATOM    522  H   THR    34     135.707 137.843 189.991  1.00  0.00           H
ATOM    523  CA  THR    34     137.122 139.440 190.191  1.00  0.00           C
ATOM    524  HA  THR    34     137.022 140.253 190.895  1.00  0.00           H
ATOM    525  CB  THR    34     138.069 138.408 190.821  1.00  0.00           C
ATOM    526  HB  THR    34     137.532 137.892 191.618  1.00  0.00           H
ATOM    527  CG2 THR    34     138.599 137.361 189.841  1.00  0.00           C
ATOM    528 HG21 THR    34     139.076 136.547 190.384  1.00  0.00           H
ATOM    529 HG22 THR    34     139.319 137.810 189.155  1.00  0.00           H
ATOM    530 HG23 THR    34     137.769 136.949 189.268  1.00  0.00           H
ATOM    531  OG1 THR    34     139.166 139.065 191.406  1.00  0.00           O
ATOM    532  HG1 THR    34     139.883 138.407 191.498  1.00  0.00           H
ATOM    533  C   THR    34     137.637 140.038 188.869  1.00  0.00           C
ATOM    534  O   THR    34     137.459 139.408 187.827  1.00  0.00           O
ATOM    535  N   PRO    35     138.235 141.248 188.850  1.00  0.00           N
ATOM    536  CD  PRO    35     138.592 142.067 189.999  1.00  0.00           C
ATOM    537  HD2 PRO    35     139.191 141.513 190.721  1.00  0.00           H
ATOM    538  HD3 PRO    35     137.683 142.445 190.469  1.00  0.00           H
ATOM    539  CG  PRO    35     139.399 143.233 189.435  1.00  0.00           C
ATOM    540  HG2 PRO    35     140.445 142.939 189.327  1.00  0.00           H
ATOM    541  HG3 PRO    35     139.311 144.126 190.056  1.00  0.00           H
ATOM    542  CB  PRO    35     138.774 143.434 188.056  1.00  0.00           C
ATOM    543  HB2 PRO    35     139.470 143.915 187.367  1.00  0.00           H
ATOM    544  HB3 PRO    35     137.865 144.030 188.152  1.00  0.00           H
ATOM    545  CA  PRO    35     138.406 142.013 187.609  1.00  0.00           C
ATOM    546  HA  PRO    35     137.453 142.051 187.078  1.00  0.00           H
ATOM    547  C   PRO    35     139.447 141.451 186.631  1.00  0.00           C
ATOM    548  O   PRO    35     139.359 141.731 185.439  1.00  0.00           O
ATOM    549  N   LEU    36     140.439 140.685 187.104  1.00  0.00           N
ATOM    550  H   LEU    36     140.459 140.480 188.091  1.00  0.00           H
ATOM    551  CA  LEU    36     141.464 140.065 186.257  1.00  0.00           C
ATOM    552  HA  LEU    36     140.959 139.727 185.355  1.00  0.00           H
ATOM    553  CB  LEU    36     142.513 141.137 185.879  1.00  0.00           C
ATOM    554  HB2 LEU    36     142.005 142.068 185.624  1.00  0.00           H
ATOM    555  HB3 LEU    36     143.134 141.335 186.754  1.00  0.00           H
ATOM    556  CG  LEU    36     143.419 140.763 184.692  1.00  0.00           C
ATOM    557  HG  LEU    36     143.901 139.805 184.889  1.00  0.00           H
ATOM    558  CD1 LEU    36     142.636 140.682 183.378  1.00  0.00           C
ATOM    559 HD11 LEU    36     142.110 141.622 183.200  1.00  0.00           H
ATOM    560 HD12 LEU    36     141.907 139.877 183.403  1.00  0.00           H
ATOM    561 HD13 LEU    36     143.317 140.501 182.550  1.00  0.00           H
ATOM    562  CD2 LEU    36     144.507 141.821 184.518  1.00  0.00           C
ATOM    563 HD21 LEU    36     144.058 142.784 184.270  1.00  0.00           H
ATOM    564 HD22 LEU    36     145.080 141.925 185.437  1.00  0.00           H
ATOM    565 HD23 LEU    36     145.183 141.528 183.714  1.00  0.00           H
ATOM    566  C   LEU    36     142.112 138.864 186.981  1.00  0.00           C
ATOM    567  O   LEU    36     142.405 138.992 188.172  1.00  0.00           O
ATOM    568  N   PRO    37     142.393 137.720 186.317  1.00  0.00           N
ATOM    569  CD  PRO    37     142.056 137.402 184.932  1.00  0.00           C
ATOM    570  HD2 PRO    37     142.834 137.781 184.269  1.00  0.00           H
ATOM    571  HD3 PRO    37     141.083 137.797 184.641  1.00  0.00           H
ATOM    572  CG  PRO    37     142.019 135.877 184.850  1.00  0.00           C
ATOM    573  HG2 PRO    37     142.276 135.517 183.853  1.00  0.00           H
ATOM    574  HG3 PRO    37     141.034 135.518 185.150  1.00  0.00           H
ATOM    575  CB  PRO    37     143.052 135.461 185.890  1.00  0.00           C
ATOM    576  HB2 PRO    37     144.053 135.542 185.461  1.00  0.00           H
ATOM    577  HB3 PRO    37     142.875 134.449 186.255  1.00  0.00           H
ATOM    578  CA  PRO    37     142.862 136.504 186.997  1.00  0.00           C
ATOM    579  HA  PRO    37     142.067 136.163 187.661  1.00  0.00           H
ATOM    580  C   PRO    37     144.143 136.648 187.832  1.00  0.00           C
ATOM    581  O   PRO    37     144.302 135.933 188.816  1.00  0.00           O
ATOM    582  N   VAL    38     145.034 137.588 187.493  1.00  0.00           N
ATOM    583  H   VAL    38     144.839 138.151 186.680  1.00  0.00           H
ATOM    584  CA  VAL    38     146.331 137.787 188.176  1.00  0.00           C
ATOM    585  HA  VAL    38     146.869 136.838 188.153  1.00  0.00           H
ATOM    586  CB  VAL    38     147.201 138.828 187.441  1.00  0.00           C
ATOM    587  HB  VAL    38     148.170 138.863 187.936  1.00  0.00           H
ATOM    588  CG1 VAL    38     147.445 138.427 185.983  1.00  0.00           C
ATOM    589 HG11 VAL    38     148.164 139.113 185.535  1.00  0.00           H
ATOM    590 HG12 VAL    38     147.856 137.417 185.941  1.00  0.00           H
ATOM    591 HG13 VAL    38     146.520 138.468 185.411  1.00  0.00           H
ATOM    592  CG2 VAL    38     146.607 140.243 187.469  1.00  0.00           C
ATOM    593 HG21 VAL    38     146.570 140.617 188.493  1.00  0.00           H
ATOM    594 HG22 VAL    38     145.604 140.246 187.047  1.00  0.00           H
ATOM    595 HG23 VAL    38     147.241 140.916 186.890  1.00  0.00           H
ATOM    596  C   VAL    38     146.220 138.176 189.657  1.00  0.00           C
ATOM    597  O   VAL    38     147.171 137.973 190.407  1.00  0.00           O
ATOM    598  N   ILE    39     145.080 138.718 190.105  1.00  0.00           N
ATOM    599  H   ILE    39     144.322 138.860 189.448  1.00  0.00           H
ATOM    600  CA  ILE    39     144.835 139.000 191.532  1.00  0.00           C
ATOM    601  HA  ILE    39     145.804 139.163 192.006  1.00  0.00           H
ATOM    602  CB  ILE    39     144.029 140.315 191.674  1.00  0.00           C
ATOM    603  HB  ILE    39     144.319 140.981 190.858  1.00  0.00           H
ATOM    604  CG2 ILE    39     142.512 140.084 191.557  1.00  0.00           C
ATOM    605 HG21 ILE    39     142.290 139.464 190.690  1.00  0.00           H
ATOM    606 HG22 ILE    39     141.994 141.035 191.432  1.00  0.00           H
ATOM    607 HG23 ILE    39     142.134 139.589 192.451  1.00  0.00           H
ATOM    608  CG1 ILE    39     144.434 141.025 192.986  1.00  0.00           C
ATOM    609 HG12 ILE    39     144.402 140.321 193.814  1.00  0.00           H
ATOM    610 HG13 ILE    39     145.467 141.362 192.884  1.00  0.00           H
ATOM    611  CD1 ILE    39     143.573 142.240 193.353  1.00  0.00           C
ATOM    612 HD11 ILE    39     143.485 142.901 192.495  1.00  0.00           H
ATOM    613 HD12 ILE    39     144.037 142.778 194.180  1.00  0.00           H
ATOM    614 HD13 ILE    39     142.578 141.920 193.658  1.00  0.00           H
ATOM    615  C   ILE    39     144.197 137.801 192.266  1.00  0.00           C
ATOM    616  O   ILE    39     144.097 137.788 193.493  1.00  0.00           O
ATOM    617  N   GLY    40     143.761 136.769 191.539  1.00  0.00           N
ATOM    618  H   GLY    40     143.954 136.762 190.543  1.00  0.00           H
ATOM    619  CA  GLY    40     142.915 135.700 192.063  1.00  0.00           C
ATOM    620  HA2 GLY    40     142.813 134.922 191.306  1.00  0.00           H
ATOM    621  HA3 GLY    40     143.395 135.254 192.932  1.00  0.00           H
ATOM    622  C   GLY    40     141.510 136.185 192.451  1.00  0.00           C
ATOM    623  O   GLY    40     141.001 137.191 191.959  1.00  0.00           O
ATOM    624  N   ASN    41     140.853 135.456 193.345  1.00  0.00           N
ATOM    625  H   ASN    41     141.364 134.684 193.759  1.00  0.00           H
ATOM    626  CA  ASN    41     139.445 135.573 193.722  1.00  0.00           C
ATOM    627  HA  ASN    41     138.882 135.742 192.806  1.00  0.00           H
ATOM    628  CB  ASN    41     139.012 134.215 194.332  1.00  0.00           C
ATOM    629  HB2 ASN    41     139.633 134.003 195.203  1.00  0.00           H
ATOM    630  HB3 ASN    41     137.981 134.282 194.672  1.00  0.00           H
ATOM    631  CG  ASN    41     139.082 133.022 193.388  1.00  0.00           C
ATOM    632  OD1 ASN    41     139.399 131.911 193.786  1.00  0.00           O
ATOM    633  ND2 ASN    41     138.774 133.205 192.123  1.00  0.00           N
ATOM    634 HD21 ASN    41     138.495 134.104 191.788  1.00  0.00           H
ATOM    635 HD22 ASN    41     138.803 132.419 191.484  1.00  0.00           H
ATOM    636  C   ASN    41     139.087 136.773 194.633  1.00  0.00           C
ATOM    637  O   ASN    41     138.060 136.724 195.302  1.00  0.00           O
ATOM    638  N   ILE    42     139.883 137.851 194.671  1.00  0.00           N
ATOM    639  H   ILE    42     140.683 137.867 194.052  1.00  0.00           H
ATOM    640  CA  ILE    42     139.714 138.964 195.633  1.00  0.00           C
ATOM    641  HA  ILE    42     139.822 138.557 196.637  1.00  0.00           H
ATOM    642  CB  ILE    42     140.822 140.028 195.425  1.00  0.00           C
ATOM    643  HB  ILE    42     140.868 140.245 194.357  1.00  0.00           H
ATOM    644  CG2 ILE    42     140.536 141.367 196.133  1.00  0.00           C
ATOM    645 HG21 ILE    42     139.689 141.870 195.666  1.00  0.00           H
ATOM    646 HG22 ILE    42     141.403 142.025 196.054  1.00  0.00           H
ATOM    647 HG23 ILE    42     140.306 141.199 197.186  1.00  0.00           H
ATOM    648  CG1 ILE    42     142.212 139.504 195.853  1.00  0.00           C
ATOM    649 HG12 ILE    42     142.411 138.566 195.338  1.00  0.00           H
ATOM    650 HG13 ILE    42     142.962 140.219 195.520  1.00  0.00           H
ATOM    651  CD1 ILE    42     142.431 139.293 197.360  1.00  0.00           C
ATOM    652 HD11 ILE    42     142.391 140.246 197.886  1.00  0.00           H
ATOM    653 HD12 ILE    42     143.416 138.852 197.519  1.00  0.00           H
ATOM    654 HD13 ILE    42     141.678 138.623 197.773  1.00  0.00           H
ATOM    655  C   ILE    42     138.310 139.596 195.614  1.00  0.00           C
ATOM    656  O   ILE    42     137.781 139.881 196.684  1.00  0.00           O
ATOM    657  N   LEU    43     137.688 139.794 194.443  1.00  0.00           N
ATOM    658  H   LEU    43     138.174 139.564 193.588  1.00  0.00           H
ATOM    659  CA  LEU    43     136.325 140.354 194.357  1.00  0.00           C
ATOM    660  HA  LEU    43     136.156 140.952 195.253  1.00  0.00           H
ATOM    661  CB  LEU    43     136.207 141.296 193.140  1.00  0.00           C
ATOM    662  HB2 LEU    43     137.189 141.478 192.702  1.00  0.00           H
ATOM    663  HB3 LEU    43     135.582 140.807 192.393  1.00  0.00           H
ATOM    664  CG  LEU    43     135.568 142.654 193.487  1.00  0.00           C
ATOM    665  HG  LEU    43     134.767 142.512 194.212  1.00  0.00           H
ATOM    666  CD1 LEU    43     136.616 143.607 194.070  1.00  0.00           C
ATOM    667 HD11 LEU    43     137.109 143.141 194.921  1.00  0.00           H
ATOM    668 HD12 LEU    43     136.130 144.525 194.399  1.00  0.00           H
ATOM    669 HD13 LEU    43     137.366 143.847 193.316  1.00  0.00           H
ATOM    670  CD2 LEU    43     134.980 143.317 192.241  1.00  0.00           C
ATOM    671 HD21 LEU    43     135.751 143.466 191.486  1.00  0.00           H
ATOM    672 HD22 LEU    43     134.201 142.673 191.829  1.00  0.00           H
ATOM    673 HD23 LEU    43     134.531 144.272 192.508  1.00  0.00           H
ATOM    674  C   LEU    43     135.199 139.299 194.369  1.00  0.00           C
ATOM    675  O   LEU    43     134.033 139.668 194.293  1.00  0.00           O
ATOM    676  N   GLN    44     135.511 137.998 194.474  1.00  0.00           N
ATOM    677  H   GLN    44     136.475 137.741 194.644  1.00  0.00           H
ATOM    678  CA  GLN    44     134.486 136.937 194.493  1.00  0.00           C
ATOM    679  HA  GLN    44     133.790 137.118 193.673  1.00  0.00           H
ATOM    680  CB  GLN    44     135.126 135.549 194.307  1.00  0.00           C
ATOM    681  HB2 GLN    44     135.830 135.371 195.121  1.00  0.00           H
ATOM    682  HB3 GLN    44     134.347 134.796 194.400  1.00  0.00           H
ATOM    683  CG  GLN    44     135.847 135.335 192.966  1.00  0.00           C
ATOM    684  HG2 GLN    44     136.712 135.991 192.928  1.00  0.00           H
ATOM    685  HG3 GLN    44     136.184 134.300 192.923  1.00  0.00           H
ATOM    686  CD  GLN    44     135.000 135.605 191.729  1.00  0.00           C
ATOM    687  OE1 GLN    44     135.469 136.178 190.760  1.00  0.00           O
ATOM    688  NE2 GLN    44     133.751 135.210 191.695  1.00  0.00           N
ATOM    689 HE21 GLN    44     133.184 135.527 190.934  1.00  0.00           H
ATOM    690 HE22 GLN    44     133.416 134.552 192.402  1.00  0.00           H
ATOM    691  C   GLN    44     133.641 136.920 195.778  1.00  0.00           C
ATOM    692  O   GLN    44     132.619 136.235 195.823  1.00  0.00           O
ATOM    693  N   ILE    45     134.068 137.644 196.816  1.00  0.00           N
ATOM    694  H   ILE    45     134.888 138.218 196.677  1.00  0.00           H
ATOM    695  CA  ILE    45     133.392 137.793 198.108  1.00  0.00           C
ATOM    696  HA  ILE    45     132.339 137.547 197.968  1.00  0.00           H
ATOM    697  CB  ILE    45     133.950 136.841 199.195  1.00  0.00           C
ATOM    698  HB  ILE    45     133.286 136.954 200.055  1.00  0.00           H
ATOM    699  CG2 ILE    45     133.830 135.368 198.781  1.00  0.00           C
ATOM    700 HG21 ILE    45     132.795 135.149 198.520  1.00  0.00           H
ATOM    701 HG22 ILE    45     134.127 134.736 199.614  1.00  0.00           H
ATOM    702 HG23 ILE    45     134.463 135.152 197.921  1.00  0.00           H
ATOM    703  CG1 ILE    45     135.367 137.168 199.731  1.00  0.00           C
ATOM    704 HG12 ILE    45     135.365 138.171 200.158  1.00  0.00           H
ATOM    705 HG13 ILE    45     135.581 136.480 200.550  1.00  0.00           H
ATOM    706  CD1 ILE    45     136.529 137.074 198.730  1.00  0.00           C
ATOM    707 HD11 ILE    45     136.556 136.092 198.261  1.00  0.00           H
ATOM    708 HD12 ILE    45     137.469 137.235 199.258  1.00  0.00           H
ATOM    709 HD13 ILE    45     136.435 137.844 197.965  1.00  0.00           H
ATOM    710  C   ILE    45     133.453 139.249 198.573  1.00  0.00           C
ATOM    711  O   ILE    45     134.361 140.005 198.230  1.00  0.00           O
ATOM    712  N   GLY    46     132.483 139.635 199.395  1.00  0.00           N
ATOM    713  H   GLY    46     131.733 138.982 199.581  1.00  0.00           H
ATOM    714  CA  GLY    46     132.387 140.967 199.970  1.00  0.00           C
ATOM    715  HA2 GLY    46     132.379 141.697 199.166  1.00  0.00           H
ATOM    716  HA3 GLY    46     131.454 141.043 200.528  1.00  0.00           H
ATOM    717  C   GLY    46     133.523 141.288 200.928  1.00  0.00           C
ATOM    718  O   GLY    46     133.492 140.874 202.078  1.00  0.00           O
ATOM    719  N   ILE    47     134.491 142.090 200.487  1.00  0.00           N
ATOM    720  H   ILE    47     134.507 142.263 199.492  1.00  0.00           H
ATOM    721  CA  ILE    47     135.678 142.489 201.268  1.00  0.00           C
ATOM    722  HA  ILE    47     136.228 141.584 201.529  1.00  0.00           H
ATOM    723  CB  ILE    47     136.598 143.362 200.370  1.00  0.00           C
ATOM    724  HB  ILE    47     136.056 144.271 200.101  1.00  0.00           H
ATOM    725  CG2 ILE    47     137.882 143.802 201.096  1.00  0.00           C
ATOM    726 HG21 ILE    47     137.646 144.452 201.938  1.00  0.00           H
ATOM    727 HG22 ILE    47     138.527 144.362 200.417  1.00  0.00           H
ATOM    728 HG23 ILE    47     138.422 142.928 201.465  1.00  0.00           H
ATOM    729  CG1 ILE    47     136.997 142.612 199.071  1.00  0.00           C
ATOM    730 HG12 ILE    47     138.044 142.803 198.830  1.00  0.00           H
ATOM    731 HG13 ILE    47     136.899 141.534 199.212  1.00  0.00           H
ATOM    732  CD1 ILE    47     136.175 143.039 197.848  1.00  0.00           C
ATOM    733 HD11 ILE    47     135.111 142.886 198.014  1.00  0.00           H
ATOM    734 HD12 ILE    47     136.480 142.435 196.996  1.00  0.00           H
ATOM    735 HD13 ILE    47     136.359 144.090 197.625  1.00  0.00           H
ATOM    736  C   ILE    47     135.324 143.179 202.607  1.00  0.00           C
ATOM    737  O   ILE    47     136.130 143.180 203.530  1.00  0.00           O
ATOM    738  N   LYS    48     134.111 143.736 202.734  1.00  0.00           N
ATOM    739  H   LYS    48     133.495 143.682 201.937  1.00  0.00           H
ATOM    740  CA  LYS    48     133.577 144.370 203.958  1.00  0.00           C
ATOM    741  HA  LYS    48     134.404 144.594 204.637  1.00  0.00           H
ATOM    742  CB  LYS    48     132.880 145.689 203.569  1.00  0.00           C
ATOM    743  HB2 LYS    48     131.967 145.448 203.025  1.00  0.00           H
ATOM    744  HB3 LYS    48     132.604 146.222 204.480  1.00  0.00           H
ATOM    745  CG  LYS    48     133.730 146.612 202.676  1.00  0.00           C
ATOM    746  HG2 LYS    48     134.684 146.823 203.162  1.00  0.00           H
ATOM    747  HG3 LYS    48     133.935 146.104 201.735  1.00  0.00           H
ATOM    748  CD  LYS    48     133.008 147.936 202.379  1.00  0.00           C
ATOM    749  HD2 LYS    48     131.936 147.765 202.261  1.00  0.00           H
ATOM    750  HD3 LYS    48     133.157 148.613 203.217  1.00  0.00           H
ATOM    751  CE  LYS    48     133.558 148.590 201.106  1.00  0.00           C
ATOM    752  HE2 LYS    48     133.286 149.650 201.095  1.00  0.00           H
ATOM    753  HE3 LYS    48     134.648 148.518 201.109  1.00  0.00           H
ATOM    754  NZ  LYS    48     133.003 147.939 199.900  1.00  0.00           N
ATOM    755  HZ1 LYS    48     132.986 146.928 199.956  1.00  0.00           H
ATOM    756  HZ2 LYS    48     133.444 148.262 199.034  1.00  0.00           H
ATOM    757  HZ3 LYS    48     132.041 148.240 199.725  1.00  0.00           H
ATOM    758  C   LYS    48     132.610 143.470 204.759  1.00  0.00           C
ATOM    759  O   LYS    48     132.179 143.859 205.843  1.00  0.00           O
ATOM    760  N   ASP    49     132.255 142.303 204.207  1.00  0.00           N
ATOM    761  H   ASP    49     132.746 142.038 203.365  1.00  0.00           H
ATOM    762  CA  ASP    49     131.101 141.453 204.569  1.00  0.00           C
ATOM    763  HA  ASP    49     130.768 141.729 205.571  1.00  0.00           H
ATOM    764  CB  ASP    49     129.912 141.670 203.590  1.00  0.00           C
ATOM    765  HB2 ASP    49     130.200 141.266 202.618  1.00  0.00           H
ATOM    766  HB3 ASP    49     129.065 141.082 203.947  1.00  0.00           H
ATOM    767  CG  ASP    49     129.404 143.105 203.357  1.00  0.00           C
ATOM    768  OD1 ASP    49     128.403 143.274 202.629  1.00  0.00           O
ATOM    769  OD2 ASP    49     129.980 144.078 203.887  1.00  0.00           O
ATOM    770  C   ASP    49     131.491 139.948 204.607  1.00  0.00           C
ATOM    771  O   ASP    49     130.654 139.063 204.415  1.00  0.00           O
ATOM    772  N   ILE    50     132.787 139.653 204.783  1.00  0.00           N
ATOM    773  H   ILE    50     133.371 140.446 205.006  1.00  0.00           H
ATOM    774  CA  ILE    50     133.495 138.508 204.168  1.00  0.00           C
ATOM    775  HA  ILE    50     133.567 138.713 203.102  1.00  0.00           H
ATOM    776  CB  ILE    50     134.955 138.423 204.688  1.00  0.00           C
ATOM    777  HB  ILE    50     134.927 138.322 205.774  1.00  0.00           H
ATOM    778  CG2 ILE    50     135.679 137.191 204.107  1.00  0.00           C
ATOM    779 HG21 ILE    50     135.199 136.268 204.432  1.00  0.00           H
ATOM    780 HG22 ILE    50     136.710 137.155 204.456  1.00  0.00           H
ATOM    781 HG23 ILE    50     135.676 137.236 203.017  1.00  0.00           H
ATOM    782  CG1 ILE    50     135.738 139.714 204.333  1.00  0.00           C
ATOM    783 HG12 ILE    50     135.882 139.768 203.253  1.00  0.00           H
ATOM    784 HG13 ILE    50     135.163 140.589 204.634  1.00  0.00           H
ATOM    785  CD1 ILE    50     137.103 139.838 205.024  1.00  0.00           C
ATOM    786 HD11 ILE    50     136.985 139.721 206.101  1.00  0.00           H
ATOM    787 HD12 ILE    50     137.519 140.826 204.822  1.00  0.00           H
ATOM    788 HD13 ILE    50     137.799 139.090 204.647  1.00  0.00           H
ATOM    789  C   ILE    50     132.745 137.172 204.247  1.00  0.00           C
ATOM    790  O   ILE    50     132.327 136.650 203.212  1.00  0.00           O
ATOM    791  N   SER    51     132.550 136.599 205.436  1.00  0.00           N
ATOM    792  H   SER    51     132.943 137.032 206.258  1.00  0.00           H
ATOM    793  CA  SER    51     131.971 135.250 205.554  1.00  0.00           C
ATOM    794  HA  SER    51     132.448 134.625 204.808  1.00  0.00           H
ATOM    795  CB  SER    51     132.327 134.634 206.900  1.00  0.00           C
ATOM    796  HB2 SER    51     131.959 135.274 207.698  1.00  0.00           H
ATOM    797  HB3 SER    51     131.870 133.648 206.982  1.00  0.00           H
ATOM    798  OG  SER    51     133.732 134.509 206.996  1.00  0.00           O
ATOM    799  HG  SER    51     133.937 134.268 207.923  1.00  0.00           H
ATOM    800  C   SER    51     130.457 135.198 205.285  1.00  0.00           C
ATOM    801  O   SER    51     129.975 134.236 204.681  1.00  0.00           O
ATOM    802  N   LYS    52     129.719 136.274 205.598  1.00  0.00           N
ATOM    803  H   LYS    52     130.193 137.052 206.038  1.00  0.00           H
ATOM    804  CA  LYS    52     128.306 136.464 205.206  1.00  0.00           C
ATOM    805  HA  LYS    52     127.745 135.568 205.468  1.00  0.00           H
ATOM    806  CB  LYS    52     127.709 137.665 205.972  1.00  0.00           C
ATOM    807  HB2 LYS    52     128.335 138.539 205.784  1.00  0.00           H
ATOM    808  HB3 LYS    52     126.716 137.886 205.578  1.00  0.00           H
ATOM    809  CG  LYS    52     127.597 137.466 207.499  1.00  0.00           C
ATOM    810  HG2 LYS    52     128.520 137.029 207.882  1.00  0.00           H
ATOM    811  HG3 LYS    52     127.483 138.449 207.960  1.00  0.00           H
ATOM    812  CD  LYS    52     126.401 136.600 207.936  1.00  0.00           C
ATOM    813  HD2 LYS    52     125.469 137.103 207.670  1.00  0.00           H
ATOM    814  HD3 LYS    52     126.440 135.638 207.427  1.00  0.00           H
ATOM    815  CE  LYS    52     126.449 136.382 209.456  1.00  0.00           C
ATOM    816  HE2 LYS    52     127.399 135.905 209.704  1.00  0.00           H
ATOM    817  HE3 LYS    52     126.429 137.352 209.960  1.00  0.00           H
ATOM    818  NZ  LYS    52     125.337 135.538 209.954  1.00  0.00           N
ATOM    819  HZ1 LYS    52     124.420 135.977 209.817  1.00  0.00           H
ATOM    820  HZ2 LYS    52     125.448 135.346 210.946  1.00  0.00           H
ATOM    821  HZ3 LYS    52     125.289 134.650 209.486  1.00  0.00           H
ATOM    822  C   LYS    52     128.138 136.632 203.683  1.00  0.00           C
ATOM    823  O   LYS    52     127.048 136.410 203.157  1.00  0.00           O
ATOM    824  N   SER    53     129.211 136.952 202.954  1.00  0.00           N
ATOM    825  H   SER    53     130.038 137.259 203.455  1.00  0.00           H
ATOM    826  CA  SER    53     129.276 136.854 201.490  1.00  0.00           C
ATOM    827  HA  SER    53     128.279 137.033 201.090  1.00  0.00           H
ATOM    828  CB  SER    53     130.163 137.973 200.947  1.00  0.00           C
ATOM    829  HB2 SER    53     129.833 138.933 201.351  1.00  0.00           H
ATOM    830  HB3 SER    53     131.195 137.801 201.250  1.00  0.00           H
ATOM    831  OG  SER    53     130.087 138.012 199.536  1.00  0.00           O
ATOM    832  HG  SER    53     129.334 138.587 199.281  1.00  0.00           H
ATOM    833  C   SER    53     129.730 135.460 201.005  1.00  0.00           C
ATOM    834  O   SER    53     129.074 134.871 200.144  1.00  0.00           O
ATOM    835  N   LEU    54     130.771 134.867 201.609  1.00  0.00           N
ATOM    836  H   LEU    54     131.269 135.413 202.306  1.00  0.00           H
ATOM    837  CA  LEU    54     131.314 133.528 201.290  1.00  0.00           C
ATOM    838  HA  LEU    54     131.663 133.544 200.258  1.00  0.00           H
ATOM    839  CB  LEU    54     132.537 133.305 202.210  1.00  0.00           C
ATOM    840  HB2 LEU    54     133.195 134.168 202.090  1.00  0.00           H
ATOM    841  HB3 LEU    54     132.180 133.312 203.236  1.00  0.00           H
ATOM    842  CG  LEU    54     133.426 132.051 202.055  1.00  0.00           C
ATOM    843  HG  LEU    54     134.365 132.272 202.564  1.00  0.00           H
ATOM    844  CD1 LEU    54     132.857 130.812 202.746  1.00  0.00           C
ATOM    845 HD11 LEU    54     132.641 131.034 203.791  1.00  0.00           H
ATOM    846 HD12 LEU    54     133.589 130.005 202.712  1.00  0.00           H
ATOM    847 HD13 LEU    54     131.954 130.469 202.255  1.00  0.00           H
ATOM    848  CD2 LEU    54     133.777 131.725 200.604  1.00  0.00           C
ATOM    849 HD21 LEU    54     132.876 131.509 200.035  1.00  0.00           H
ATOM    850 HD22 LEU    54     134.305 132.562 200.155  1.00  0.00           H
ATOM    851 HD23 LEU    54     134.428 130.852 200.576  1.00  0.00           H
ATOM    852  C   LEU    54     130.263 132.402 201.401  1.00  0.00           C
ATOM    853  O   LEU    54     130.269 131.453 200.612  1.00  0.00           O
ATOM    854  N   THR    55     129.295 132.530 202.313  1.00  0.00           N
ATOM    855  H   THR    55     129.384 133.277 202.996  1.00  0.00           H
ATOM    856  CA  THR    55     128.172 131.582 202.452  1.00  0.00           C
ATOM    857  HA  THR    55     128.588 130.613 202.726  1.00  0.00           H
ATOM    858  CB  THR    55     127.265 132.029 203.613  1.00  0.00           C
ATOM    859  HB  THR    55     127.894 132.336 204.450  1.00  0.00           H
ATOM    860  CG2 THR    55     126.319 133.175 203.262  1.00  0.00           C
ATOM    861 HG21 THR    55     125.518 132.824 202.612  1.00  0.00           H
ATOM    862 HG22 THR    55     126.873 133.963 202.759  1.00  0.00           H
ATOM    863 HG23 THR    55     125.883 133.573 204.178  1.00  0.00           H
ATOM    864  OG1 THR    55     126.470 130.956 204.035  1.00  0.00           O
ATOM    865  HG1 THR    55     127.080 130.341 204.480  1.00  0.00           H
ATOM    866  C   THR    55     127.378 131.370 201.147  1.00  0.00           C
ATOM    867  O   THR    55     126.948 130.257 200.850  1.00  0.00           O
ATOM    868  N   ASN    56     127.274 132.396 200.290  1.00  0.00           N
ATOM    869  H   ASN    56     127.716 133.270 200.543  1.00  0.00           H
ATOM    870  CA  ASN    56     126.586 132.310 198.994  1.00  0.00           C
ATOM    871  HA  ASN    56     125.588 131.895 199.150  1.00  0.00           H
ATOM    872  CB  ASN    56     126.447 133.716 198.391  1.00  0.00           C
ATOM    873  HB2 ASN    56     127.432 134.136 198.188  1.00  0.00           H
ATOM    874  HB3 ASN    56     125.909 133.641 197.446  1.00  0.00           H
ATOM    875  CG  ASN    56     125.673 134.646 199.294  1.00  0.00           C
ATOM    876  OD1 ASN    56     124.460 134.652 199.307  1.00  0.00           O
ATOM    877  ND2 ASN    56     126.344 135.477 200.052  1.00  0.00           N
ATOM    878 HD21 ASN    56     127.355 135.432 200.041  1.00  0.00           H
ATOM    879 HD22 ASN    56     125.852 135.968 200.780  1.00  0.00           H
ATOM    880  C   ASN    56     127.311 131.398 197.997  1.00  0.00           C
ATOM    881  O   ASN    56     126.669 130.667 197.243  1.00  0.00           O
ATOM    882  N   LEU    57     128.646 131.430 197.999  1.00  0.00           N
ATOM    883  H   LEU    57     129.108 132.029 198.670  1.00  0.00           H
ATOM    884  CA  LEU    57     129.484 130.565 197.165  1.00  0.00           C
ATOM    885  HA  LEU    57     129.161 130.630 196.127  1.00  0.00           H
ATOM    886  CB  LEU    57     130.960 130.996 197.265  1.00  0.00           C
ATOM    887  HB2 LEU    57     131.251 131.062 198.311  1.00  0.00           H
ATOM    888  HB3 LEU    57     131.560 130.203 196.821  1.00  0.00           H
ATOM    889  CG  LEU    57     131.339 132.307 196.551  1.00  0.00           C
ATOM    890  HG  LEU    57     131.101 132.209 195.494  1.00  0.00           H
ATOM    891  CD1 LEU    57     130.625 133.541 197.110  1.00  0.00           C
ATOM    892 HD11 LEU    57     129.587 133.545 196.785  1.00  0.00           H
ATOM    893 HD12 LEU    57     131.095 134.446 196.734  1.00  0.00           H
ATOM    894 HD13 LEU    57     130.678 133.550 198.197  1.00  0.00           H
ATOM    895  CD2 LEU    57     132.844 132.529 196.692  1.00  0.00           C
ATOM    896 HD21 LEU    57     133.115 132.640 197.741  1.00  0.00           H
ATOM    897 HD22 LEU    57     133.371 131.680 196.264  1.00  0.00           H
ATOM    898 HD23 LEU    57     133.136 133.424 196.143  1.00  0.00           H
ATOM    899  C   LEU    57     129.326 129.110 197.618  1.00  0.00           C
ATOM    900  O   LEU    57     129.145 128.214 196.801  1.00  0.00           O
ATOM    901  N   SER    58     129.310 128.904 198.936  1.00  0.00           N
ATOM    902  H   SER    58     129.441 129.716 199.521  1.00  0.00           H
ATOM    903  CA  SER    58     129.252 127.591 199.593  1.00  0.00           C
ATOM    904  HA  SER    58     130.165 127.044 199.357  1.00  0.00           H
ATOM    905  CB  SER    58     129.189 127.776 201.114  1.00  0.00           C
ATOM    906  HB2 SER    58     128.211 128.157 201.405  1.00  0.00           H
ATOM    907  HB3 SER    58     129.337 126.807 201.594  1.00  0.00           H
ATOM    908  OG  SER    58     130.194 128.671 201.562  1.00  0.00           O
ATOM    909  HG  SER    58     129.992 129.571 201.280  1.00  0.00           H
ATOM    910  C   SER    58     128.070 126.722 199.139  1.00  0.00           C
ATOM    911  O   SER    58     128.184 125.499 199.144  1.00  0.00           O
ATOM    912  N   LYS    59     126.961 127.330 198.686  1.00  0.00           N
ATOM    913  H   LYS    59     126.951 128.341 198.696  1.00  0.00           H
ATOM    914  CA  LYS    59     125.785 126.627 198.137  1.00  0.00           C
ATOM    915  HA  LYS    59     125.362 125.980 198.905  1.00  0.00           H
ATOM    916  CB  LYS    59     124.734 127.658 197.688  1.00  0.00           C
ATOM    917  HB2 LYS    59     125.222 128.419 197.077  1.00  0.00           H
ATOM    918  HB3 LYS    59     123.998 127.162 197.051  1.00  0.00           H
ATOM    919  CG  LYS    59     123.980 128.347 198.837  1.00  0.00           C
ATOM    920  HG2 LYS    59     124.687 128.763 199.556  1.00  0.00           H
ATOM    921  HG3 LYS    59     123.407 129.168 198.407  1.00  0.00           H
ATOM    922  CD  LYS    59     123.021 127.373 199.546  1.00  0.00           C
ATOM    923  HD2 LYS    59     122.440 126.833 198.798  1.00  0.00           H
ATOM    924  HD3 LYS    59     123.597 126.641 200.112  1.00  0.00           H
ATOM    925  CE  LYS    59     122.044 128.061 200.507  1.00  0.00           C
ATOM    926  HE2 LYS    59     121.481 127.278 201.024  1.00  0.00           H
ATOM    927  HE3 LYS    59     122.605 128.628 201.253  1.00  0.00           H
ATOM    928  NZ  LYS    59     121.104 128.939 199.774  1.00  0.00           N
ATOM    929  HZ1 LYS    59     120.628 128.447 199.012  1.00  0.00           H
ATOM    930  HZ2 LYS    59     121.560 129.726 199.347  1.00  0.00           H
ATOM    931  HZ3 LYS    59     120.327 129.289 200.328  1.00  0.00           H
ATOM    932  C   LYS    59     126.108 125.696 196.962  1.00  0.00           C
ATOM    933  O   LYS    59     125.540 124.611 196.904  1.00  0.00           O
ATOM    934  N   VAL    60     127.009 126.099 196.059  1.00  0.00           N
ATOM    935  H   VAL    60     127.494 126.973 196.223  1.00  0.00           H
ATOM    936  CA  VAL    60     127.357 125.330 194.843  1.00  0.00           C
ATOM    937  HA  VAL    60     126.523 124.657 194.641  1.00  0.00           H
ATOM    938  CB  VAL    60     127.453 126.275 193.621  1.00  0.00           C
ATOM    939  HB  VAL    60     126.706 127.061 193.752  1.00  0.00           H
ATOM    940  CG1 VAL    60     128.815 126.963 193.463  1.00  0.00           C
ATOM    941 HG11 VAL    60     129.582 126.233 193.203  1.00  0.00           H
ATOM    942 HG12 VAL    60     128.760 127.707 192.670  1.00  0.00           H
ATOM    943 HG13 VAL    60     129.097 127.452 194.391  1.00  0.00           H
ATOM    944  CG2 VAL    60     127.108 125.570 192.304  1.00  0.00           C
ATOM    945 HG21 VAL    60     127.845 124.800 192.083  1.00  0.00           H
ATOM    946 HG22 VAL    60     127.095 126.293 191.489  1.00  0.00           H
ATOM    947 HG23 VAL    60     126.123 125.109 192.381  1.00  0.00           H
ATOM    948  C   VAL    60     128.576 124.409 195.039  1.00  0.00           C
ATOM    949  O   VAL    60     129.062 123.806 194.087  1.00  0.00           O
ATOM    950  N   TYR    61     129.073 124.293 196.277  1.00  0.00           N
ATOM    951  H   TYR    61     128.606 124.793 197.018  1.00  0.00           H
ATOM    952  CA  TYR    61     130.296 123.554 196.610  1.00  0.00           C
ATOM    953  HA  TYR    61     130.607 122.958 195.752  1.00  0.00           H
ATOM    954  CB  TYR    61     131.415 124.560 196.929  1.00  0.00           C
ATOM    955  HB2 TYR    61     131.106 125.148 197.794  1.00  0.00           H
ATOM    956  HB3 TYR    61     132.293 123.999 197.237  1.00  0.00           H
ATOM    957  CG  TYR    61     131.825 125.509 195.808  1.00  0.00           C
ATOM    958  CD1 TYR    61     132.139 125.025 194.520  1.00  0.00           C
ATOM    959  HD1 TYR    61     132.053 123.968 194.304  1.00  0.00           H
ATOM    960  CE1 TYR    61     132.526 125.917 193.498  1.00  0.00           C
ATOM    961  HE1 TYR    61     132.740 125.551 192.506  1.00  0.00           H
ATOM    962  CZ  TYR    61     132.595 127.302 193.758  1.00  0.00           C
ATOM    963  OH  TYR    61     132.974 128.171 192.784  1.00  0.00           O
ATOM    964  HH  TYR    61     132.763 129.097 193.041  1.00  0.00           H
ATOM    965  CE2 TYR    61     132.291 127.785 195.046  1.00  0.00           C
ATOM    966  HE2 TYR    61     132.334 128.845 195.236  1.00  0.00           H
ATOM    967  CD2 TYR    61     131.913 126.891 196.065  1.00  0.00           C
ATOM    968  HD2 TYR    61     131.672 127.265 197.050  1.00  0.00           H
ATOM    969  C   TYR    61     130.125 122.563 197.772  1.00  0.00           C
ATOM    970  O   TYR    61     130.572 121.427 197.666  1.00  0.00           O
ATOM    971  N   GLY    62     129.489 122.958 198.876  1.00  0.00           N
ATOM    972  H   GLY    62     129.120 123.900 198.908  1.00  0.00           H
ATOM    973  CA  GLY    62     129.544 122.215 200.140  1.00  0.00           C
ATOM    974  HA2 GLY    62     128.586 122.317 200.647  1.00  0.00           H
ATOM    975  HA3 GLY    62     129.708 121.153 199.944  1.00  0.00           H
ATOM    976  C   GLY    62     130.651 122.718 201.088  1.00  0.00           C
ATOM    977  O   GLY    62     131.253 123.764 200.836  1.00  0.00           O
ATOM    978  N   PRO    63     130.905 122.037 202.224  1.00  0.00           N
ATOM    979  CD  PRO    63     130.172 120.871 202.701  1.00  0.00           C
ATOM    980  HD2 PRO    63     130.791 119.985 202.563  1.00  0.00           H
ATOM    981  HD3 PRO    63     129.209 120.736 202.209  1.00  0.00           H
ATOM    982  CG  PRO    63     129.964 121.107 204.192  1.00  0.00           C
ATOM    983  HG2 PRO    63     129.795 120.174 204.731  1.00  0.00           H
ATOM    984  HG3 PRO    63     129.146 121.811 204.351  1.00  0.00           H
ATOM    985  CB  PRO    63     131.292 121.751 204.567  1.00  0.00           C
ATOM    986  HB2 PRO    63     132.048 120.971 204.670  1.00  0.00           H
ATOM    987  HB3 PRO    63     131.219 122.328 205.488  1.00  0.00           H
ATOM    988  CA  PRO    63     131.616 122.639 203.356  1.00  0.00           C
ATOM    989  HA  PRO    63     131.181 123.624 203.520  1.00  0.00           H
ATOM    990  C   PRO    63     133.135 122.835 203.246  1.00  0.00           C
ATOM    991  O   PRO    63     133.696 123.412 204.175  1.00  0.00           O
ATOM    992  N   VAL    64     133.821 122.339 202.205  1.00  0.00           N
ATOM    993  H   VAL    64     133.301 121.977 201.416  1.00  0.00           H
ATOM    994  CA  VAL    64     135.303 122.320 202.139  1.00  0.00           C
ATOM    995  HA  VAL    64     135.683 123.136 202.756  1.00  0.00           H
ATOM    996  CB  VAL    64     135.907 121.012 202.712  1.00  0.00           C
ATOM    997  HB  VAL    64     135.647 120.177 202.061  1.00  0.00           H
ATOM    998  CG1 VAL    64     137.439 121.083 202.816  1.00  0.00           C
ATOM    999 HG11 VAL    64     137.733 121.871 203.508  1.00  0.00           H
ATOM   1000 HG12 VAL    64     137.830 120.127 203.165  1.00  0.00           H
ATOM   1001 HG13 VAL    64     137.886 121.284 201.846  1.00  0.00           H
ATOM   1002  CG2 VAL    64     135.383 120.689 204.115  1.00  0.00           C
ATOM   1003 HG21 VAL    64     135.971 119.901 204.581  1.00  0.00           H
ATOM   1004 HG22 VAL    64     134.346 120.360 204.059  1.00  0.00           H
ATOM   1005 HG23 VAL    64     135.447 121.576 204.742  1.00  0.00           H
ATOM   1006  C   VAL    64     135.797 122.591 200.716  1.00  0.00           C
ATOM   1007  O   VAL    64     136.184 121.676 199.988  1.00  0.00           O
ATOM   1008  N   PHE    65     135.804 123.864 200.323  1.00  0.00           N
ATOM   1009  H   PHE    65     135.541 124.564 201.005  1.00  0.00           H
ATOM   1010  CA  PHE    65     136.284 124.325 199.014  1.00  0.00           C
ATOM   1011  HA  PHE    65     136.641 123.461 198.453  1.00  0.00           H
ATOM   1012  CB  PHE    65     135.119 124.906 198.192  1.00  0.00           C
ATOM   1013  HB2 PHE    65     135.481 125.138 197.193  1.00  0.00           H
ATOM   1014  HB3 PHE    65     134.379 124.114 198.076  1.00  0.00           H
ATOM   1015  CG  PHE    65     134.406 126.132 198.731  1.00  0.00           C
ATOM   1016  CD1 PHE    65     133.533 126.008 199.827  1.00  0.00           C
ATOM   1017  HD1 PHE    65     133.389 125.049 200.304  1.00  0.00           H
ATOM   1018  CE1 PHE    65     132.822 127.123 200.295  1.00  0.00           C
ATOM   1019  HE1 PHE    65     132.160 127.015 201.143  1.00  0.00           H
ATOM   1020  CZ  PHE    65     132.947 128.362 199.646  1.00  0.00           C
ATOM   1021  HZ  PHE    65     132.376 129.207 199.999  1.00  0.00           H
ATOM   1022  CE2 PHE    65     133.802 128.490 198.537  1.00  0.00           C
ATOM   1023  HE2 PHE    65     133.886 129.440 198.031  1.00  0.00           H
ATOM   1024  CD2 PHE    65     134.538 127.378 198.086  1.00  0.00           C
ATOM   1025  HD2 PHE    65     135.179 127.476 197.223  1.00  0.00           H
ATOM   1026  C   PHE    65     137.507 125.242 199.166  1.00  0.00           C
ATOM   1027  O   PHE    65     138.114 125.318 200.230  1.00  0.00           O
ATOM   1028  N   THR    66     137.966 125.885 198.093  1.00  0.00           N
ATOM   1029  H   THR    66     137.459 125.805 197.224  1.00  0.00           H
ATOM   1030  CA  THR    66     139.211 126.678 198.097  1.00  0.00           C
ATOM   1031  HA  THR    66     139.389 127.075 199.096  1.00  0.00           H
ATOM   1032  CB  THR    66     140.409 125.782 197.731  1.00  0.00           C
ATOM   1033  HB  THR    66     140.154 125.197 196.848  1.00  0.00           H
ATOM   1034  CG2 THR    66     141.727 126.506 197.459  1.00  0.00           C
ATOM   1035 HG21 THR    66     142.514 125.770 197.289  1.00  0.00           H
ATOM   1036 HG22 THR    66     142.001 127.121 198.314  1.00  0.00           H
ATOM   1037 HG23 THR    66     141.643 127.132 196.573  1.00  0.00           H
ATOM   1038  OG1 THR    66     140.659 124.903 198.801  1.00  0.00           O
ATOM   1039  HG1 THR    66     139.818 124.694 199.226  1.00  0.00           H
ATOM   1040  C   THR    66     139.095 127.875 197.166  1.00  0.00           C
ATOM   1041  O   THR    66     138.567 127.751 196.059  1.00  0.00           O
ATOM   1042  N   LEU    67     139.585 129.030 197.616  1.00  0.00           N
ATOM   1043  H   LEU    67     140.044 129.020 198.526  1.00  0.00           H
ATOM   1044  CA  LEU    67     139.820 130.222 196.799  1.00  0.00           C
ATOM   1045  HA  LEU    67     139.340 130.112 195.827  1.00  0.00           H
ATOM   1046  CB  LEU    67     139.244 131.478 197.490  1.00  0.00           C
ATOM   1047  HB2 LEU    67     139.475 131.448 198.556  1.00  0.00           H
ATOM   1048  HB3 LEU    67     139.758 132.345 197.073  1.00  0.00           H
ATOM   1049  CG  LEU    67     137.732 131.708 197.287  1.00  0.00           C
ATOM   1050  HG  LEU    67     137.517 131.692 196.220  1.00  0.00           H
ATOM   1051  CD1 LEU    67     136.848 130.672 197.985  1.00  0.00           C
ATOM   1052 HD11 LEU    67     136.967 129.697 197.518  1.00  0.00           H
ATOM   1053 HD12 LEU    67     135.801 130.964 197.910  1.00  0.00           H
ATOM   1054 HD13 LEU    67     137.123 130.601 199.038  1.00  0.00           H
ATOM   1055  CD2 LEU    67     137.325 133.083 197.816  1.00  0.00           C
ATOM   1056 HD21 LEU    67     137.493 133.135 198.892  1.00  0.00           H
ATOM   1057 HD22 LEU    67     137.908 133.859 197.320  1.00  0.00           H
ATOM   1058 HD23 LEU    67     136.270 133.263 197.608  1.00  0.00           H
ATOM   1059  C   LEU    67     141.328 130.363 196.546  1.00  0.00           C
ATOM   1060  O   LEU    67     142.144 129.908 197.345  1.00  0.00           O
ATOM   1061  N   TYR    68     141.693 131.005 195.440  1.00  0.00           N
ATOM   1062  H   TYR    68     140.968 131.377 194.837  1.00  0.00           H
ATOM   1063  CA  TYR    68     143.076 131.367 195.120  1.00  0.00           C
ATOM   1064  HA  TYR    68     143.749 130.963 195.876  1.00  0.00           H
ATOM   1065  CB  TYR    68     143.476 130.765 193.769  1.00  0.00           C
ATOM   1066  HB2 TYR    68     142.628 130.791 193.084  1.00  0.00           H
ATOM   1067  HB3 TYR    68     144.263 131.381 193.329  1.00  0.00           H
ATOM   1068  CG  TYR    68     143.998 129.349 193.888  1.00  0.00           C
ATOM   1069  CD1 TYR    68     143.119 128.260 194.055  1.00  0.00           C
ATOM   1070  HD1 TYR    68     142.053 128.430 194.085  1.00  0.00           H
ATOM   1071  CE1 TYR    68     143.632 126.954 194.195  1.00  0.00           C
ATOM   1072  HE1 TYR    68     142.963 126.119 194.331  1.00  0.00           H
ATOM   1073  CZ  TYR    68     145.029 126.742 194.171  1.00  0.00           C
ATOM   1074  OH  TYR    68     145.539 125.494 194.338  1.00  0.00           O
ATOM   1075  HH  TYR    68     144.864 124.815 194.310  1.00  0.00           H
ATOM   1076  CE2 TYR    68     145.901 127.835 193.998  1.00  0.00           C
ATOM   1077  HE2 TYR    68     146.969 127.679 193.980  1.00  0.00           H
ATOM   1078  CD2 TYR    68     145.386 129.133 193.857  1.00  0.00           C
ATOM   1079  HD2 TYR    68     146.063 129.966 193.730  1.00  0.00           H
ATOM   1080  C   TYR    68     143.241 132.884 195.126  1.00  0.00           C
ATOM   1081  O   TYR    68     142.348 133.595 194.673  1.00  0.00           O
ATOM   1082  N   PHE    69     144.375 133.391 195.604  1.00  0.00           N
ATOM   1083  H   PHE    69     145.064 132.742 195.980  1.00  0.00           H
ATOM   1084  CA  PHE    69     144.666 134.822 195.715  1.00  0.00           C
ATOM   1085  HA  PHE    69     143.984 135.390 195.082  1.00  0.00           H
ATOM   1086  CB  PHE    69     144.434 135.264 197.162  1.00  0.00           C
ATOM   1087  HB2 PHE    69     145.135 134.719 197.794  1.00  0.00           H
ATOM   1088  HB3 PHE    69     144.662 136.327 197.241  1.00  0.00           H
ATOM   1089  CG  PHE    69     143.027 135.037 197.688  1.00  0.00           C
ATOM   1090  CD1 PHE    69     142.787 134.059 198.672  1.00  0.00           C
ATOM   1091  HD1 PHE    69     143.598 133.437 199.027  1.00  0.00           H
ATOM   1092  CE1 PHE    69     141.494 133.895 199.202  1.00  0.00           C
ATOM   1093  HE1 PHE    69     141.310 133.154 199.966  1.00  0.00           H
ATOM   1094  CZ  PHE    69     140.438 134.700 198.745  1.00  0.00           C
ATOM   1095  HZ  PHE    69     139.450 134.587 199.168  1.00  0.00           H
ATOM   1096  CE2 PHE    69     140.664 135.649 197.735  1.00  0.00           C
ATOM   1097  HE2 PHE    69     139.844 136.259 197.381  1.00  0.00           H
ATOM   1098  CD2 PHE    69     141.956 135.813 197.204  1.00  0.00           C
ATOM   1099  HD2 PHE    69     142.130 136.540 196.427  1.00  0.00           H
ATOM   1100  C   PHE    69     146.095 135.093 195.231  1.00  0.00           C
ATOM   1101  O   PHE    69     147.071 134.645 195.836  1.00  0.00           O
ATOM   1102  N   GLY    70     146.221 135.753 194.077  1.00  0.00           N
ATOM   1103  H   GLY    70     145.395 136.168 193.667  1.00  0.00           H
ATOM   1104  CA  GLY    70     147.372 135.516 193.203  1.00  0.00           C
ATOM   1105  HA2 GLY    70     147.231 136.023 192.248  1.00  0.00           H
ATOM   1106  HA3 GLY    70     148.276 135.899 193.675  1.00  0.00           H
ATOM   1107  C   GLY    70     147.518 134.009 192.943  1.00  0.00           C
ATOM   1108  O   GLY    70     146.536 133.332 192.642  1.00  0.00           O
ATOM   1109  N   LEU    71     148.725 133.475 193.137  1.00  0.00           N
ATOM   1110  H   LEU    71     149.488 134.092 193.363  1.00  0.00           H
ATOM   1111  CA  LEU    71     149.001 132.033 193.087  1.00  0.00           C
ATOM   1112  HA  LEU    71     148.404 131.600 192.283  1.00  0.00           H
ATOM   1113  CB  LEU    71     150.493 131.875 192.733  1.00  0.00           C
ATOM   1114  HB2 LEU    71     150.694 132.451 191.829  1.00  0.00           H
ATOM   1115  HB3 LEU    71     151.077 132.307 193.545  1.00  0.00           H
ATOM   1116  CG  LEU    71     151.001 130.439 192.503  1.00  0.00           C
ATOM   1117  HG  LEU    71     150.907 129.859 193.418  1.00  0.00           H
ATOM   1118  CD1 LEU    71     150.253 129.731 191.372  1.00  0.00           C
ATOM   1119 HD11 LEU    71     149.210 129.580 191.650  1.00  0.00           H
ATOM   1120 HD12 LEU    71     150.700 128.754 191.200  1.00  0.00           H
ATOM   1121 HD13 LEU    71     150.311 130.317 190.455  1.00  0.00           H
ATOM   1122  CD2 LEU    71     152.482 130.490 192.136  1.00  0.00           C
ATOM   1123 HD21 LEU    71     152.631 131.048 191.212  1.00  0.00           H
ATOM   1124 HD22 LEU    71     153.053 130.953 192.941  1.00  0.00           H
ATOM   1125 HD23 LEU    71     152.846 129.473 192.000  1.00  0.00           H
ATOM   1126  C   LEU    71     148.631 131.267 194.380  1.00  0.00           C
ATOM   1127  O   LEU    71     148.566 130.040 194.359  1.00  0.00           O
ATOM   1128  N   LYS    72     148.415 131.948 195.517  1.00  0.00           N
ATOM   1129  H   LYS    72     148.332 132.957 195.480  1.00  0.00           H
ATOM   1130  CA  LYS    72     148.300 131.284 196.829  1.00  0.00           C
ATOM   1131  HA  LYS    72     149.064 130.510 196.867  1.00  0.00           H
ATOM   1132  CB  LYS    72     148.603 132.255 197.983  1.00  0.00           C
ATOM   1133  HB2 LYS    72     147.805 132.996 198.065  1.00  0.00           H
ATOM   1134  HB3 LYS    72     148.621 131.676 198.909  1.00  0.00           H
ATOM   1135  CG  LYS    72     149.944 132.987 197.819  1.00  0.00           C
ATOM   1136  HG2 LYS    72     150.686 132.312 197.391  1.00  0.00           H
ATOM   1137  HG3 LYS    72     149.802 133.831 197.142  1.00  0.00           H
ATOM   1138  CD  LYS    72     150.466 133.488 199.171  1.00  0.00           C
ATOM   1139  HD2 LYS    72     149.648 133.913 199.753  1.00  0.00           H
ATOM   1140  HD3 LYS    72     150.884 132.643 199.722  1.00  0.00           H
ATOM   1141  CE  LYS    72     151.548 134.549 198.958  1.00  0.00           C
ATOM   1142  HE2 LYS    72     152.302 134.153 198.272  1.00  0.00           H
ATOM   1143  HE3 LYS    72     151.100 135.430 198.497  1.00  0.00           H
ATOM   1144  NZ  LYS    72     152.192 134.913 200.237  1.00  0.00           N
ATOM   1145  HZ1 LYS    72     151.493 135.134 200.941  1.00  0.00           H
ATOM   1146  HZ2 LYS    72     152.791 135.719 200.123  1.00  0.00           H
ATOM   1147  HZ3 LYS    72     152.765 134.125 200.558  1.00  0.00           H
ATOM   1148  C   LYS    72     146.918 130.635 197.035  1.00  0.00           C
ATOM   1149  O   LYS    72     145.918 131.345 196.902  1.00  0.00           O
ATOM   1150  N   PRO    73     146.823 129.343 197.409  1.00  0.00           N
ATOM   1151  CD  PRO    73     147.891 128.358 197.459  1.00  0.00           C
ATOM   1152  HD2 PRO    73     148.385 128.408 198.430  1.00  0.00           H
ATOM   1153  HD3 PRO    73     148.613 128.501 196.656  1.00  0.00           H
ATOM   1154  CG  PRO    73     147.215 127.002 197.287  1.00  0.00           C
ATOM   1155  HG2 PRO    73     147.725 126.232 197.868  1.00  0.00           H
ATOM   1156  HG3 PRO    73     147.213 126.731 196.234  1.00  0.00           H
ATOM   1157  CB  PRO    73     145.777 127.207 197.768  1.00  0.00           C
ATOM   1158  HB2 PRO    73     145.654 126.752 198.753  1.00  0.00           H
ATOM   1159  HB3 PRO    73     145.073 126.754 197.070  1.00  0.00           H
ATOM   1160  CA  PRO    73     145.567 128.729 197.837  1.00  0.00           C
ATOM   1161  HA  PRO    73     144.765 129.013 197.154  1.00  0.00           H
ATOM   1162  C   PRO    73     145.197 129.137 199.271  1.00  0.00           C
ATOM   1163  O   PRO    73     146.053 129.152 200.157  1.00  0.00           O
ATOM   1164  N   ILE    74     143.905 129.355 199.526  1.00  0.00           N
ATOM   1165  H   ILE    74     143.264 129.395 198.739  1.00  0.00           H
ATOM   1166  CA  ILE    74     143.314 129.363 200.873  1.00  0.00           C
ATOM   1167  HA  ILE    74     144.025 128.913 201.566  1.00  0.00           H
ATOM   1168  CB  ILE    74     143.033 130.800 201.376  1.00  0.00           C
ATOM   1169  HB  ILE    74     142.426 131.309 200.629  1.00  0.00           H
ATOM   1170  CG2 ILE    74     142.239 130.778 202.700  1.00  0.00           C
ATOM   1171 HG21 ILE    74     141.294 130.249 202.578  1.00  0.00           H
ATOM   1172 HG22 ILE    74     141.997 131.791 203.017  1.00  0.00           H
ATOM   1173 HG23 ILE    74     142.823 130.285 203.479  1.00  0.00           H
ATOM   1174  CG1 ILE    74     144.364 131.576 201.543  1.00  0.00           C
ATOM   1175 HG12 ILE    74     145.032 131.003 202.188  1.00  0.00           H
ATOM   1176 HG13 ILE    74     144.841 131.667 200.567  1.00  0.00           H
ATOM   1177  CD1 ILE    74     144.242 132.992 202.120  1.00  0.00           C
ATOM   1178 HD11 ILE    74     143.507 133.565 201.555  1.00  0.00           H
ATOM   1179 HD12 ILE    74     145.211 133.488 202.054  1.00  0.00           H
ATOM   1180 HD13 ILE    74     143.951 132.952 203.169  1.00  0.00           H
ATOM   1181  C   ILE    74     142.065 128.476 200.862  1.00  0.00           C
ATOM   1182  O   ILE    74     141.079 128.762 200.175  1.00  0.00           O
ATOM   1183  N   VAL    75     142.112 127.388 201.632  1.00  0.00           N
ATOM   1184  H   VAL    75     142.925 127.268 202.225  1.00  0.00           H
ATOM   1185  CA  VAL    75     140.970 126.486 201.841  1.00  0.00           C
ATOM   1186  HA  VAL    75     140.463 126.371 200.887  1.00  0.00           H
ATOM   1187  CB  VAL    75     141.430 125.067 202.252  1.00  0.00           C
ATOM   1188  HB  VAL    75     141.976 124.640 201.410  1.00  0.00           H
ATOM   1189  CG1 VAL    75     142.376 125.066 203.451  1.00  0.00           C
ATOM   1190 HG11 VAL    75     143.281 125.626 203.223  1.00  0.00           H
ATOM   1191 HG12 VAL    75     141.876 125.519 204.300  1.00  0.00           H
ATOM   1192 HG13 VAL    75     142.663 124.044 203.701  1.00  0.00           H
ATOM   1193  CG2 VAL    75     140.272 124.116 202.582  1.00  0.00           C
ATOM   1194 HG21 VAL    75     140.664 123.125 202.812  1.00  0.00           H
ATOM   1195 HG22 VAL    75     139.612 124.021 201.724  1.00  0.00           H
ATOM   1196 HG23 VAL    75     139.706 124.477 203.441  1.00  0.00           H
ATOM   1197  C   VAL    75     139.966 127.138 202.798  1.00  0.00           C
ATOM   1198  O   VAL    75     140.343 127.727 203.811  1.00  0.00           O
ATOM   1199  N   VAL    76     138.681 127.066 202.457  1.00  0.00           N
ATOM   1200  H   VAL    76     138.438 126.504 201.647  1.00  0.00           H
ATOM   1201  CA  VAL    76     137.565 127.650 203.213  1.00  0.00           C
ATOM   1202  HA  VAL    76     137.954 128.238 204.043  1.00  0.00           H
ATOM   1203  CB  VAL    76     136.696 128.591 202.344  1.00  0.00           C
ATOM   1204  HB  VAL    76     135.725 128.703 202.827  1.00  0.00           H
ATOM   1205  CG1 VAL    76     137.311 129.991 202.240  1.00  0.00           C
ATOM   1206 HG11 VAL    76     137.245 130.481 203.208  1.00  0.00           H
ATOM   1207 HG12 VAL    76     138.352 129.924 201.922  1.00  0.00           H
ATOM   1208 HG13 VAL    76     136.752 130.596 201.528  1.00  0.00           H
ATOM   1209  CG2 VAL    76     136.457 128.095 200.914  1.00  0.00           C
ATOM   1210 HG21 VAL    76     137.390 128.077 200.352  1.00  0.00           H
ATOM   1211 HG22 VAL    76     135.758 128.762 200.415  1.00  0.00           H
ATOM   1212 HG23 VAL    76     136.021 127.099 200.939  1.00  0.00           H
ATOM   1213  C   VAL    76     136.719 126.533 203.814  1.00  0.00           C
ATOM   1214  O   VAL    76     136.180 125.698 203.085  1.00  0.00           O
ATOM   1215  N   LEU    77     136.594 126.524 205.145  1.00  0.00           N
ATOM   1216  H   LEU    77     137.056 127.253 205.680  1.00  0.00           H
ATOM   1217  CA  LEU    77     135.646 125.656 205.845  1.00  0.00           C
ATOM   1218  HA  LEU    77     135.433 124.792 205.217  1.00  0.00           H
ATOM   1219  CB  LEU    77     136.227 125.118 207.167  1.00  0.00           C
ATOM   1220  HB2 LEU    77     136.317 125.945 207.873  1.00  0.00           H
ATOM   1221  HB3 LEU    77     135.507 124.407 207.576  1.00  0.00           H
ATOM   1222  CG  LEU    77     137.599 124.420 207.074  1.00  0.00           C
ATOM   1223  HG  LEU    77     138.365 125.173 206.891  1.00  0.00           H
ATOM   1224  CD1 LEU    77     137.904 123.715 208.397  1.00  0.00           C
ATOM   1225 HD11 LEU    77     137.754 124.396 209.230  1.00  0.00           H
ATOM   1226 HD12 LEU    77     138.938 123.369 208.401  1.00  0.00           H
ATOM   1227 HD13 LEU    77     137.246 122.855 208.526  1.00  0.00           H
ATOM   1228  CD2 LEU    77     137.683 123.355 205.981  1.00  0.00           C
ATOM   1229 HD21 LEU    77     136.924 122.593 206.153  1.00  0.00           H
ATOM   1230 HD22 LEU    77     137.534 123.807 205.002  1.00  0.00           H
ATOM   1231 HD23 LEU    77     138.667 122.887 206.000  1.00  0.00           H
ATOM   1232  C   LEU    77     134.330 126.412 206.064  1.00  0.00           C
ATOM   1233  O   LEU    77     134.321 127.493 206.663  1.00  0.00           O
ATOM   1234  N   HID    78     133.224 125.834 205.594  1.00  0.00           N
ATOM   1235  H   HID    78     133.340 124.962 205.085  1.00  0.00           H
ATOM   1236  CA  HID    78     131.868 126.366 205.731  1.00  0.00           C
ATOM   1237  HA  HID    78     131.876 127.081 206.550  1.00  0.00           H
ATOM   1238  CB  HID    78     131.465 127.159 204.475  1.00  0.00           C
ATOM   1239  HB2 HID    78     132.231 127.906 204.262  1.00  0.00           H
ATOM   1240  HB3 HID    78     131.407 126.483 203.621  1.00  0.00           H
ATOM   1241  CG  HID    78     130.136 127.864 204.635  1.00  0.00           C
ATOM   1242  ND1 HID    78     128.908 127.249 204.692  1.00  0.00           N
ATOM   1243  HD1 HID    78     128.772 126.244 204.632  1.00  0.00           H
ATOM   1244  CE1 HID    78     127.979 128.172 204.974  1.00  0.00           C
ATOM   1245  HE1 HID    78     126.923 127.970 205.106  1.00  0.00           H
ATOM   1246  NE2 HID    78     128.552 129.380 205.105  1.00  0.00           N
ATOM   1247  CD2 HID    78     129.927 129.192 204.893  1.00  0.00           C
ATOM   1248  HD2 HID    78     130.696 129.947 204.975  1.00  0.00           H
ATOM   1249  C   HID    78     130.874 125.259 206.134  1.00  0.00           C
ATOM   1250  O   HID    78     130.043 124.796 205.349  1.00  0.00           O
ATOM   1251  N   GLY    79     130.953 124.835 207.393  1.00  0.00           N
ATOM   1252  H   GLY    79     131.631 125.285 207.996  1.00  0.00           H
ATOM   1253  CA  GLY    79     129.973 123.954 208.025  1.00  0.00           C
ATOM   1254  HA2 GLY    79     129.090 124.539 208.287  1.00  0.00           H
ATOM   1255  HA3 GLY    79     129.673 123.168 207.332  1.00  0.00           H
ATOM   1256  C   GLY    79     130.533 123.297 209.282  1.00  0.00           C
ATOM   1257  O   GLY    79     131.631 122.744 209.248  1.00  0.00           O
ATOM   1258  N   TYR    80     129.770 123.331 210.378  1.00  0.00           N
ATOM   1259  H   TYR    80     128.918 123.876 210.339  1.00  0.00           H
ATOM   1260  CA  TYR    80     130.216 122.882 211.703  1.00  0.00           C
ATOM   1261  HA  TYR    80     130.947 123.600 212.078  1.00  0.00           H
ATOM   1262  CB  TYR    80     129.019 122.886 212.656  1.00  0.00           C
ATOM   1263  HB2 TYR    80     128.654 123.910 212.757  1.00  0.00           H
ATOM   1264  HB3 TYR    80     128.217 122.290 212.219  1.00  0.00           H
ATOM   1265  CG  TYR    80     129.334 122.340 214.037  1.00  0.00           C
ATOM   1266  CD1 TYR    80     130.021 123.148 214.961  1.00  0.00           C
ATOM   1267  HD1 TYR    80     130.336 124.138 214.673  1.00  0.00           H
ATOM   1268  CE1 TYR    80     130.295 122.670 216.254  1.00  0.00           C
ATOM   1269  HE1 TYR    80     130.803 123.296 216.970  1.00  0.00           H
ATOM   1270  CZ  TYR    80     129.909 121.363 216.614  1.00  0.00           C
ATOM   1271  OH  TYR    80     130.151 120.912 217.870  1.00  0.00           O
ATOM   1272  HH  TYR    80     130.202 121.661 218.486  1.00  0.00           H
ATOM   1273  CE2 TYR    80     129.258 120.534 215.677  1.00  0.00           C
ATOM   1274  HE2 TYR    80     128.984 119.528 215.954  1.00  0.00           H
ATOM   1275  CD2 TYR    80     128.962 121.026 214.391  1.00  0.00           C
ATOM   1276  HD2 TYR    80     128.453 120.391 213.678  1.00  0.00           H
ATOM   1277  C   TYR    80     130.898 121.506 211.724  1.00  0.00           C
ATOM   1278  O   TYR    80     131.976 121.388 212.297  1.00  0.00           O
ATOM   1279  N   GLU    81     130.326 120.482 211.078  1.00  0.00           N
ATOM   1280  H   GLU    81     129.434 120.620 210.633  1.00  0.00           H
ATOM   1281  CA  GLU    81     130.923 119.137 211.081  1.00  0.00           C
ATOM   1282  HA  GLU    81     131.055 118.831 212.120  1.00  0.00           H
ATOM   1283  CB  GLU    81     129.976 118.125 210.409  1.00  0.00           C
ATOM   1284  HB2 GLU    81     128.954 118.302 210.748  1.00  0.00           H
ATOM   1285  HB3 GLU    81     129.992 118.301 209.333  1.00  0.00           H
ATOM   1286  CG  GLU    81     130.346 116.649 210.671  1.00  0.00           C
ATOM   1287  HG2 GLU    81     129.755 116.034 209.989  1.00  0.00           H
ATOM   1288  HG3 GLU    81     131.397 116.490 210.429  1.00  0.00           H
ATOM   1289  CD  GLU    81     130.064 116.164 212.107  1.00  0.00           C
ATOM   1290  OE1 GLU    81     129.253 116.792 212.823  1.00  0.00           O
ATOM   1291  OE2 GLU    81     130.597 115.106 212.523  1.00  0.00           O
ATOM   1292  C   GLU    81     132.317 119.127 210.428  1.00  0.00           C
ATOM   1293  O   GLU    81     133.238 118.560 210.995  1.00  0.00           O
ATOM   1294  N   ALA    82     132.517 119.838 209.312  1.00  0.00           N
ATOM   1295  H   ALA    82     131.757 120.390 208.947  1.00  0.00           H
ATOM   1296  CA  ALA    82     133.821 119.937 208.649  1.00  0.00           C
ATOM   1297  HA  ALA    82     134.242 118.936 208.556  1.00  0.00           H
ATOM   1298  CB  ALA    82     133.604 120.495 207.241  1.00  0.00           C
ATOM   1299  HB1 ALA    82     132.953 119.826 206.678  1.00  0.00           H
ATOM   1300  HB2 ALA    82     134.569 120.553 206.740  1.00  0.00           H
ATOM   1301  HB3 ALA    82     133.165 121.492 207.288  1.00  0.00           H
ATOM   1302  C   ALA    82     134.840 120.787 209.434  1.00  0.00           C
ATOM   1303  O   ALA    82     136.040 120.511 209.407  1.00  0.00           O
ATOM   1304  N   VAL    83     134.375 121.803 210.171  1.00  0.00           N
ATOM   1305  H   VAL    83     133.382 122.005 210.127  1.00  0.00           H
ATOM   1306  CA  VAL    83     135.210 122.533 211.141  1.00  0.00           C
ATOM   1307  HA  VAL    83     136.133 122.838 210.650  1.00  0.00           H
ATOM   1308  CB  VAL    83     134.493 123.807 211.641  1.00  0.00           C
ATOM   1309  HB  VAL    83     133.523 123.537 212.057  1.00  0.00           H
ATOM   1310  CG1 VAL    83     135.290 124.543 212.726  1.00  0.00           C
ATOM   1311 HG11 VAL    83     135.363 123.930 213.624  1.00  0.00           H
ATOM   1312 HG12 VAL    83     136.293 124.765 212.363  1.00  0.00           H
ATOM   1313 HG13 VAL    83     134.789 125.474 212.991  1.00  0.00           H
ATOM   1314  CG2 VAL    83     134.268 124.793 210.485  1.00  0.00           C
ATOM   1315 HG21 VAL    83     133.650 124.338 209.713  1.00  0.00           H
ATOM   1316 HG22 VAL    83     135.224 125.076 210.048  1.00  0.00           H
ATOM   1317 HG23 VAL    83     133.758 125.685 210.849  1.00  0.00           H
ATOM   1318  C   VAL    83     135.615 121.614 212.301  1.00  0.00           C
ATOM   1319  O   VAL    83     136.763 121.656 212.743  1.00  0.00           O
ATOM   1320  N   LYS    84     134.703 120.748 212.762  1.00  0.00           N
ATOM   1321  H   LYS    84     133.773 120.785 212.355  1.00  0.00           H
ATOM   1322  CA  LYS    84     134.947 119.745 213.806  1.00  0.00           C
ATOM   1323  HA  LYS    84     135.392 120.256 214.656  1.00  0.00           H
ATOM   1324  CB  LYS    84     133.597 119.145 214.242  1.00  0.00           C
ATOM   1325  HB2 LYS    84     132.873 119.948 214.391  1.00  0.00           H
ATOM   1326  HB3 LYS    84     133.232 118.493 213.453  1.00  0.00           H
ATOM   1327  CG  LYS    84     133.699 118.351 215.550  1.00  0.00           C
ATOM   1328  HG2 LYS    84     134.487 117.607 215.463  1.00  0.00           H
ATOM   1329  HG3 LYS    84     133.968 119.041 216.347  1.00  0.00           H
ATOM   1330  CD  LYS    84     132.395 117.655 215.968  1.00  0.00           C
ATOM   1331  HD2 LYS    84     132.603 117.026 216.835  1.00  0.00           H
ATOM   1332  HD3 LYS    84     131.681 118.422 216.274  1.00  0.00           H
ATOM   1333  CE  LYS    84     131.736 116.802 214.877  1.00  0.00           C
ATOM   1334  HE2 LYS    84     130.809 116.377 215.269  1.00  0.00           H
ATOM   1335  HE3 LYS    84     131.455 117.447 214.040  1.00  0.00           H
ATOM   1336  NZ  LYS    84     132.602 115.707 214.383  1.00  0.00           N
ATOM   1337  HZ1 LYS    84     132.109 115.173 213.667  1.00  0.00           H
ATOM   1338  HZ2 LYS    84     132.957 115.114 215.122  1.00  0.00           H
ATOM   1339  HZ3 LYS    84     133.471 116.043 213.958  1.00  0.00           H
ATOM   1340  C   LYS    84     135.955 118.679 213.349  1.00  0.00           C
ATOM   1341  O   LYS    84     136.916 118.437 214.082  1.00  0.00           O
ATOM   1342  N   GLU    85     135.799 118.152 212.127  1.00  0.00           N
ATOM   1343  H   GLU    85     134.941 118.368 211.633  1.00  0.00           H
ATOM   1344  CA  GLU    85     136.724 117.194 211.492  1.00  0.00           C
ATOM   1345  HA  GLU    85     136.686 116.236 212.006  1.00  0.00           H
ATOM   1346  CB  GLU    85     136.372 116.966 210.006  1.00  0.00           C
ATOM   1347  HB2 GLU    85     136.275 117.940 209.529  1.00  0.00           H
ATOM   1348  HB3 GLU    85     137.215 116.457 209.536  1.00  0.00           H
ATOM   1349  CG  GLU    85     135.118 116.139 209.680  1.00  0.00           C
ATOM   1350  HG2 GLU    85     135.330 115.086 209.876  1.00  0.00           H
ATOM   1351  HG3 GLU    85     134.297 116.434 210.329  1.00  0.00           H
ATOM   1352  CD  GLU    85     134.715 116.319 208.202  1.00  0.00           C
ATOM   1353  OE1 GLU    85     135.614 116.383 207.327  1.00  0.00           O
ATOM   1354  OE2 GLU    85     133.501 116.437 207.890  1.00  0.00           O
ATOM   1355  C   GLU    85     138.166 117.710 211.553  1.00  0.00           C
ATOM   1356  O   GLU    85     139.073 117.011 212.001  1.00  0.00           O
ATOM   1357  N   ALA    86     138.359 118.959 211.121  1.00  0.00           N
ATOM   1358  H   ALA    86     137.563 119.463 210.750  1.00  0.00           H
ATOM   1359  CA  ALA    86     139.662 119.601 211.062  1.00  0.00           C
ATOM   1360  HA  ALA    86     140.371 118.921 210.587  1.00  0.00           H
ATOM   1361  CB  ALA    86     139.523 120.845 210.177  1.00  0.00           C
ATOM   1362  HB1 ALA    86     138.764 121.513 210.582  1.00  0.00           H
ATOM   1363  HB2 ALA    86     139.228 120.556 209.171  1.00  0.00           H
ATOM   1364  HB3 ALA    86     140.479 121.362 210.121  1.00  0.00           H
ATOM   1365  C   ALA    86     140.225 119.939 212.453  1.00  0.00           C
ATOM   1366  O   ALA    86     141.353 119.571 212.757  1.00  0.00           O
ATOM   1367  N   LEU    87     139.480 120.668 213.296  1.00  0.00           N
ATOM   1368  H   LEU    87     138.540 120.918 213.005  1.00  0.00           H
ATOM   1369  CA  LEU    87     140.052 121.348 214.471  1.00  0.00           C
ATOM   1370  HA  LEU    87     141.126 121.459 214.313  1.00  0.00           H
ATOM   1371  CB  LEU    87     139.471 122.777 214.573  1.00  0.00           C
ATOM   1372  HB2 LEU    87     138.412 122.761 214.318  1.00  0.00           H
ATOM   1373  HB3 LEU    87     139.542 123.108 215.607  1.00  0.00           H
ATOM   1374  CG  LEU    87     140.199 123.841 213.721  1.00  0.00           C
ATOM   1375  HG  LEU    87     141.204 123.979 214.123  1.00  0.00           H
ATOM   1376  CD1 LEU    87     140.322 123.521 212.234  1.00  0.00           C
ATOM   1377 HD11 LEU    87     140.922 122.625 212.097  1.00  0.00           H
ATOM   1378 HD12 LEU    87     140.828 124.338 211.722  1.00  0.00           H
ATOM   1379 HD13 LEU    87     139.332 123.378 211.804  1.00  0.00           H
ATOM   1380  CD2 LEU    87     139.452 125.169 213.807  1.00  0.00           C
ATOM   1381 HD21 LEU    87     138.434 125.054 213.438  1.00  0.00           H
ATOM   1382 HD22 LEU    87     139.434 125.518 214.835  1.00  0.00           H
ATOM   1383 HD23 LEU    87     139.964 125.921 213.210  1.00  0.00           H
ATOM   1384  C   LEU    87     139.926 120.568 215.795  1.00  0.00           C
ATOM   1385  O   LEU    87     140.632 120.915 216.752  1.00  0.00           O
ATOM   1386  N   ILE    88     139.076 119.535 215.903  1.00  0.00           N
ATOM   1387  H   ILE    88     138.524 119.262 215.094  1.00  0.00           H
ATOM   1388  CA  ILE    88     138.893 118.815 217.182  1.00  0.00           C
ATOM   1389  HA  ILE    88     139.813 118.954 217.739  1.00  0.00           H
ATOM   1390  CB  ILE    88     137.791 119.485 218.035  1.00  0.00           C
ATOM   1391  HB  ILE    88     137.944 120.564 217.981  1.00  0.00           H
ATOM   1392  CG2 ILE    88     136.391 119.187 217.494  1.00  0.00           C
ATOM   1393 HG21 ILE    88     136.359 119.430 216.436  1.00  0.00           H
ATOM   1394 HG22 ILE    88     135.646 119.794 218.007  1.00  0.00           H
ATOM   1395 HG23 ILE    88     136.144 118.131 217.622  1.00  0.00           H
ATOM   1396  CG1 ILE    88     137.915 119.076 219.519  1.00  0.00           C
ATOM   1397 HG12 ILE    88     137.671 118.020 219.635  1.00  0.00           H
ATOM   1398 HG13 ILE    88     138.949 119.224 219.832  1.00  0.00           H
ATOM   1399  CD1 ILE    88     137.028 119.893 220.467  1.00  0.00           C
ATOM   1400 HD11 ILE    88     137.213 120.958 220.331  1.00  0.00           H
ATOM   1401 HD12 ILE    88     137.260 119.621 221.498  1.00  0.00           H
ATOM   1402 HD13 ILE    88     135.976 119.678 220.282  1.00  0.00           H
ATOM   1403  C   ILE    88     138.766 117.286 217.096  1.00  0.00           C
ATOM   1404  O   ILE    88     139.304 116.634 217.991  1.00  0.00           O
ATOM   1405  N   ASP    89     138.160 116.710 216.048  1.00  0.00           N
ATOM   1406  H   ASP    89     137.707 117.295 215.351  1.00  0.00           H
ATOM   1407  CA  ASP    89     138.221 115.255 215.797  1.00  0.00           C
ATOM   1408  HA  ASP    89     137.916 114.727 216.702  1.00  0.00           H
ATOM   1409  CB  ASP    89     137.270 114.844 214.657  1.00  0.00           C
ATOM   1410  HB2 ASP    89     137.645 115.283 213.733  1.00  0.00           H
ATOM   1411  HB3 ASP    89     137.327 113.760 214.543  1.00  0.00           H
ATOM   1412  CG  ASP    89     135.791 115.222 214.820  1.00  0.00           C
ATOM   1413  OD1 ASP    89     135.196 115.070 215.910  1.00  0.00           O
ATOM   1414  OD2 ASP    89     135.173 115.617 213.807  1.00  0.00           O
ATOM   1415  C   ASP    89     139.660 114.811 215.442  1.00  0.00           C
ATOM   1416  O   ASP    89     140.117 113.743 215.867  1.00  0.00           O
ATOM   1417  N   LEU    90     140.372 115.668 214.697  1.00  0.00           N
ATOM   1418  H   LEU    90     139.857 116.428 214.271  1.00  0.00           H
ATOM   1419  CA  LEU    90     141.833 115.729 214.574  1.00  0.00           C
ATOM   1420  HA  LEU    90     142.272 114.820 214.985  1.00  0.00           H
ATOM   1421  CB  LEU    90     142.218 115.828 213.080  1.00  0.00           C
ATOM   1422  HB2 LEU    90     141.808 116.756 212.678  1.00  0.00           H
ATOM   1423  HB3 LEU    90     143.305 115.880 213.004  1.00  0.00           H
ATOM   1424  CG  LEU    90     141.727 114.672 212.188  1.00  0.00           C
ATOM   1425  HG  LEU    90     140.644 114.578 212.258  1.00  0.00           H
ATOM   1426  CD1 LEU    90     142.086 114.969 210.730  1.00  0.00           C
ATOM   1427 HD11 LEU    90     141.605 115.901 210.431  1.00  0.00           H
ATOM   1428 HD12 LEU    90     141.725 114.165 210.090  1.00  0.00           H
ATOM   1429 HD13 LEU    90     143.167 115.070 210.624  1.00  0.00           H
ATOM   1430  CD2 LEU    90     142.364 113.334 212.576  1.00  0.00           C
ATOM   1431 HD21 LEU    90     143.451 113.420 212.552  1.00  0.00           H
ATOM   1432 HD22 LEU    90     142.042 113.053 213.578  1.00  0.00           H
ATOM   1433 HD23 LEU    90     142.040 112.559 211.882  1.00  0.00           H
ATOM   1434  C   LEU    90     142.355 116.901 215.438  1.00  0.00           C
ATOM   1435  O   LEU    90     142.195 116.892 216.662  1.00  0.00           O
ATOM   1436  N   GLY    91     142.923 117.947 214.836  1.00  0.00           N
ATOM   1437  H   GLY    91     143.167 117.869 213.849  1.00  0.00           H
ATOM   1438  CA  GLY    91     143.108 119.276 215.419  1.00  0.00           C
ATOM   1439  HA2 GLY    91     142.796 120.021 214.694  1.00  0.00           H
ATOM   1440  HA3 GLY    91     142.470 119.365 216.292  1.00  0.00           H
ATOM   1441  C   GLY    91     144.522 119.636 215.857  1.00  0.00           C
ATOM   1442  O   GLY    91     144.778 120.806 216.139  1.00  0.00           O
ATOM   1443  N   GLU    92     145.432 118.669 215.971  1.00  0.00           N
ATOM   1444  H   GLU    92     145.222 117.774 215.540  1.00  0.00           H
ATOM   1445  CA  GLU    92     146.794 118.917 216.461  1.00  0.00           C
ATOM   1446  HA  GLU    92     146.748 119.693 217.226  1.00  0.00           H
ATOM   1447  CB  GLU    92     147.365 117.627 217.089  1.00  0.00           C
ATOM   1448  HB2 GLU    92     146.672 116.796 216.943  1.00  0.00           H
ATOM   1449  HB3 GLU    92     148.303 117.357 216.602  1.00  0.00           H
ATOM   1450  CG  GLU    92     147.609 117.799 218.596  1.00  0.00           C
ATOM   1451  HG2 GLU    92     146.657 118.022 219.086  1.00  0.00           H
ATOM   1452  HG3 GLU    92     147.988 116.860 219.004  1.00  0.00           H
ATOM   1453  CD  GLU    92     148.619 118.919 218.866  1.00  0.00           C
ATOM   1454  OE1 GLU    92     149.712 118.906 218.259  1.00  0.00           O
ATOM   1455  OE2 GLU    92     148.299 119.885 219.598  1.00  0.00           O
ATOM   1456  C   GLU    92     147.678 119.475 215.340  1.00  0.00           C
ATOM   1457  O   GLU    92     148.263 120.552 215.466  1.00  0.00           O
ATOM   1458  N   GLU    93     147.666 118.814 214.188  1.00  0.00           N
ATOM   1459  H   GLU    93     147.149 117.933 214.167  1.00  0.00           H
ATOM   1460  CA  GLU    93     148.154 119.330 212.909  1.00  0.00           C
ATOM   1461  HA  GLU    93     149.210 119.560 213.038  1.00  0.00           H
ATOM   1462  CB  GLU    93     148.051 118.232 211.826  1.00  0.00           C
ATOM   1463  HB2 GLU    93     148.535 118.609 210.924  1.00  0.00           H
ATOM   1464  HB3 GLU    93     148.632 117.376 212.169  1.00  0.00           H
ATOM   1465  CG  GLU    93     146.648 117.722 211.430  1.00  0.00           C
ATOM   1466  HG2 GLU    93     146.185 118.470 210.782  1.00  0.00           H
ATOM   1467  HG3 GLU    93     146.758 116.809 210.841  1.00  0.00           H
ATOM   1468  CD  GLU    93     145.732 117.455 212.632  1.00  0.00           C
ATOM   1469  OE1 GLU    93     144.798 118.256 212.828  1.00  0.00           O
ATOM   1470  OE2 GLU    93     146.054 116.598 213.483  1.00  0.00           O
ATOM   1471  C   GLU    93     147.459 120.643 212.492  1.00  0.00           C
ATOM   1472  O   GLU    93     148.149 121.586 212.101  1.00  0.00           O
ATOM   1473  N   PHE    94     146.137 120.769 212.641  1.00  0.00           N
ATOM   1474  H   PHE    94     145.604 119.938 212.905  1.00  0.00           H
ATOM   1475  CA  PHE    94     145.373 122.003 212.389  1.00  0.00           C
ATOM   1476  HA  PHE    94     145.740 122.447 211.462  1.00  0.00           H
ATOM   1477  CB  PHE    94     143.890 121.646 212.179  1.00  0.00           C
ATOM   1478  HB2 PHE    94     143.637 120.795 212.807  1.00  0.00           H
ATOM   1479  HB3 PHE    94     143.262 122.472 212.510  1.00  0.00           H
ATOM   1480  CG  PHE    94     143.513 121.340 210.740  1.00  0.00           C
ATOM   1481  CD1 PHE    94     143.490 120.016 210.265  1.00  0.00           C
ATOM   1482  HD1 PHE    94     143.730 119.201 210.927  1.00  0.00           H
ATOM   1483  CE1 PHE    94     143.124 119.743 208.937  1.00  0.00           C
ATOM   1484  HE1 PHE    94     143.108 118.722 208.587  1.00  0.00           H
ATOM   1485  CZ  PHE    94     142.754 120.792 208.080  1.00  0.00           C
ATOM   1486  HZ  PHE    94     142.449 120.579 207.065  1.00  0.00           H
ATOM   1487  CE2 PHE    94     142.756 122.114 208.555  1.00  0.00           C
ATOM   1488  HE2 PHE    94     142.442 122.915 207.906  1.00  0.00           H
ATOM   1489  CD2 PHE    94     143.144 122.390 209.879  1.00  0.00           C
ATOM   1490  HD2 PHE    94     143.135 123.406 210.245  1.00  0.00           H
ATOM   1491  C   PHE    94     145.541 123.101 213.464  1.00  0.00           C
ATOM   1492  O   PHE    94     144.918 124.161 213.355  1.00  0.00           O
ATOM   1493  N   SER    95     146.375 122.905 214.495  1.00  0.00           N
ATOM   1494  H   SER    95     146.830 122.004 214.575  1.00  0.00           H
ATOM   1495  CA  SER    95     146.633 123.929 215.526  1.00  0.00           C
ATOM   1496  HA  SER    95     145.678 124.394 215.765  1.00  0.00           H
ATOM   1497  CB  SER    95     147.147 123.292 216.823  1.00  0.00           C
ATOM   1498  HB2 SER    95     147.114 124.042 217.612  1.00  0.00           H
ATOM   1499  HB3 SER    95     146.496 122.467 217.109  1.00  0.00           H
ATOM   1500  OG  SER    95     148.475 122.819 216.699  1.00  0.00           O
ATOM   1501  HG  SER    95     148.434 122.006 216.140  1.00  0.00           H
ATOM   1502  C   SER    95     147.566 125.070 215.075  1.00  0.00           C
ATOM   1503  O   SER    95     147.790 126.016 215.837  1.00  0.00           O
ATOM   1504  N   GLY    96     148.108 125.015 213.855  1.00  0.00           N
ATOM   1505  H   GLY    96     147.861 124.243 213.253  1.00  0.00           H
ATOM   1506  CA  GLY    96     148.948 126.070 213.286  1.00  0.00           C
ATOM   1507  HA2 GLY    96     149.715 126.342 214.011  1.00  0.00           H
ATOM   1508  HA3 GLY    96     149.457 125.689 212.401  1.00  0.00           H
ATOM   1509  C   GLY    96     148.176 127.338 212.893  1.00  0.00           C
ATOM   1510  O   GLY    96     146.946 127.364 212.835  1.00  0.00           O
ATOM   1511  N   ARG    97     148.917 128.405 212.594  1.00  0.00           N
ATOM   1512  H   ARG    97     149.925 128.272 212.638  1.00  0.00           H
ATOM   1513  CA  ARG    97     148.439 129.751 212.236  1.00  0.00           C
ATOM   1514  HA  ARG    97     147.350 129.755 212.230  1.00  0.00           H
ATOM   1515  CB  ARG    97     148.925 130.709 213.340  1.00  0.00           C
ATOM   1516  HB2 ARG    97     148.395 130.466 214.261  1.00  0.00           H
ATOM   1517  HB3 ARG    97     149.984 130.512 213.522  1.00  0.00           H
ATOM   1518  CG  ARG    97     148.801 132.222 213.095  1.00  0.00           C
ATOM   1519  HG2 ARG    97     149.182 132.707 213.989  1.00  0.00           H
ATOM   1520  HG3 ARG    97     149.480 132.503 212.289  1.00  0.00           H
ATOM   1521  CD  ARG    97     147.419 132.830 212.786  1.00  0.00           C
ATOM   1522  HD2 ARG    97     147.348 133.802 213.278  1.00  0.00           H
ATOM   1523  HD3 ARG    97     147.378 133.011 211.711  1.00  0.00           H
ATOM   1524  NE  ARG    97     146.247 132.004 213.141  1.00  0.00           N
ATOM   1525  HE  ARG    97     145.729 131.619 212.361  1.00  0.00           H
ATOM   1526  CZ  ARG    97     145.706 131.786 214.325  1.00  0.00           C
ATOM   1527  NH1 ARG    97     146.194 132.245 215.436  1.00  0.00           N
ATOM   1528 HH11 ARG    97     147.013 132.842 215.438  1.00  0.00           H
ATOM   1529 HH12 ARG    97     145.640 132.118 216.277  1.00  0.00           H
ATOM   1530  NH2 ARG    97     144.607 131.103 214.412  1.00  0.00           N
ATOM   1531 HH21 ARG    97     144.014 130.982 213.601  1.00  0.00           H
ATOM   1532 HH22 ARG    97     144.151 131.021 215.316  1.00  0.00           H
ATOM   1533  C   ARG    97     148.915 130.137 210.833  1.00  0.00           C
ATOM   1534  O   ARG    97     150.048 129.828 210.472  1.00  0.00           O
ATOM   1535  N   GLY    98     148.050 130.789 210.051  1.00  0.00           N
ATOM   1536  H   GLY    98     147.131 130.990 210.422  1.00  0.00           H
ATOM   1537  CA  GLY    98     148.298 131.178 208.657  1.00  0.00           C
ATOM   1538  HA2 GLY    98     148.386 130.281 208.047  1.00  0.00           H
ATOM   1539  HA3 GLY    98     147.442 131.741 208.289  1.00  0.00           H
ATOM   1540  C   GLY    98     149.552 132.035 208.447  1.00  0.00           C
ATOM   1541  O   GLY    98     150.031 132.673 209.381  1.00  0.00           O
ATOM   1542  N   ILE    99     150.051 132.074 207.205  1.00  0.00           N
ATOM   1543  H   ILE    99     149.559 131.538 206.499  1.00  0.00           H
ATOM   1544  CA  ILE    99     151.374 132.632 206.829  1.00  0.00           C
ATOM   1545  HA  ILE    99     152.139 132.052 207.344  1.00  0.00           H
ATOM   1546  CB  ILE    99     151.581 132.458 205.299  1.00  0.00           C
ATOM   1547  HB  ILE    99     150.741 132.944 204.799  1.00  0.00           H
ATOM   1548  CG2 ILE    99     152.857 133.139 204.771  1.00  0.00           C
ATOM   1549 HG21 ILE    99     152.766 134.223 204.850  1.00  0.00           H
ATOM   1550 HG22 ILE    99     153.012 132.891 203.719  1.00  0.00           H
ATOM   1551 HG23 ILE    99     153.725 132.820 205.349  1.00  0.00           H
ATOM   1552  CG1 ILE    99     151.572 130.973 204.854  1.00  0.00           C
ATOM   1553 HG12 ILE    99     150.611 130.528 205.102  1.00  0.00           H
ATOM   1554 HG13 ILE    99     151.661 130.937 203.767  1.00  0.00           H
ATOM   1555  CD1 ILE    99     152.672 130.083 205.451  1.00  0.00           C
ATOM   1556 HD11 ILE    99     153.658 130.472 205.200  1.00  0.00           H
ATOM   1557 HD12 ILE    99     152.580 129.078 205.038  1.00  0.00           H
ATOM   1558 HD13 ILE    99     152.566 130.021 206.534  1.00  0.00           H
ATOM   1559  C   ILE    99     151.608 134.092 207.276  1.00  0.00           C
ATOM   1560  O   ILE    99     152.749 134.464 207.546  1.00  0.00           O
ATOM   1561  N   PHE   100     150.538 134.885 207.419  1.00  0.00           N
ATOM   1562  H   PHE   100     149.647 134.481 207.190  1.00  0.00           H
ATOM   1563  CA  PHE   100     150.546 136.294 207.840  1.00  0.00           C
ATOM   1564  HA  PHE   100     149.502 136.592 207.858  1.00  0.00           H
ATOM   1565  CB  PHE   100     151.030 136.427 209.305  1.00  0.00           C
ATOM   1566  HB2 PHE   100     151.615 135.554 209.595  1.00  0.00           H
ATOM   1567  HB3 PHE   100     151.702 137.281 209.381  1.00  0.00           H
ATOM   1568  CG  PHE   100     149.906 136.585 210.323  1.00  0.00           C
ATOM   1569  CD1 PHE   100     148.788 135.725 210.301  1.00  0.00           C
ATOM   1570  HD1 PHE   100     148.738 134.927 209.576  1.00  0.00           H
ATOM   1571  CE1 PHE   100     147.733 135.902 211.214  1.00  0.00           C
ATOM   1572  HE1 PHE   100     146.871 135.253 211.176  1.00  0.00           H
ATOM   1573  CZ  PHE   100     147.804 136.918 212.181  1.00  0.00           C
ATOM   1574  HZ  PHE   100     147.002 137.047 212.895  1.00  0.00           H
ATOM   1575  CE2 PHE   100     148.922 137.768 212.222  1.00  0.00           C
ATOM   1576  HE2 PHE   100     148.979 138.544 212.972  1.00  0.00           H
ATOM   1577  CD2 PHE   100     149.966 137.606 211.292  1.00  0.00           C
ATOM   1578  HD2 PHE   100     150.820 138.266 211.328  1.00  0.00           H
ATOM   1579  C   PHE   100     151.204 137.265 206.822  1.00  0.00           C
ATOM   1580  O   PHE   100     151.913 136.846 205.906  1.00  0.00           O
ATOM   1581  N   PRO   101     150.920 138.583 206.902  1.00  0.00           N
ATOM   1582  CD  PRO   101     150.048 139.222 207.881  1.00  0.00           C
ATOM   1583  HD2 PRO   101     150.424 139.098 208.895  1.00  0.00           H
ATOM   1584  HD3 PRO   101     149.041 138.811 207.800  1.00  0.00           H
ATOM   1585  CG  PRO   101     150.023 140.705 207.526  1.00  0.00           C
ATOM   1586  HG2 PRO   101     150.830 141.224 208.045  1.00  0.00           H
ATOM   1587  HG3 PRO   101     149.059 141.154 207.763  1.00  0.00           H
ATOM   1588  CB  PRO   101     150.296 140.700 206.024  1.00  0.00           C
ATOM   1589  HB2 PRO   101     150.705 141.655 205.693  1.00  0.00           H
ATOM   1590  HB3 PRO   101     149.373 140.480 205.488  1.00  0.00           H
ATOM   1591  CA  PRO   101     151.281 139.540 205.848  1.00  0.00           C
ATOM   1592  HA  PRO   101     151.125 139.084 204.872  1.00  0.00           H
ATOM   1593  C   PRO   101     152.733 140.043 205.883  1.00  0.00           C
ATOM   1594  O   PRO   101     153.143 140.752 204.966  1.00  0.00           O
ATOM   1595  N   LEU   102     153.501 139.738 206.936  1.00  0.00           N
ATOM   1596  H   LEU   102     153.132 139.108 207.632  1.00  0.00           H
ATOM   1597  CA  LEU   102     154.841 140.289 207.160  1.00  0.00           C
ATOM   1598  HA  LEU   102     155.336 140.386 206.193  1.00  0.00           H
ATOM   1599  CB  LEU   102     154.689 141.695 207.785  1.00  0.00           C
ATOM   1600  HB2 LEU   102     154.128 142.328 207.096  1.00  0.00           H
ATOM   1601  HB3 LEU   102     154.099 141.596 208.698  1.00  0.00           H
ATOM   1602  CG  LEU   102     156.005 142.411 208.147  1.00  0.00           C
ATOM   1603  HG  LEU   102     156.586 141.788 208.823  1.00  0.00           H
ATOM   1604  CD1 LEU   102     156.857 142.722 206.915  1.00  0.00           C
ATOM   1605 HD11 LEU   102     157.145 141.803 206.409  1.00  0.00           H
ATOM   1606 HD12 LEU   102     157.763 143.246 207.219  1.00  0.00           H
ATOM   1607 HD13 LEU   102     156.292 143.349 206.226  1.00  0.00           H
ATOM   1608  CD2 LEU   102     155.707 143.728 208.865  1.00  0.00           C
ATOM   1609 HD21 LEU   102     155.137 144.390 208.212  1.00  0.00           H
ATOM   1610 HD22 LEU   102     155.129 143.533 209.769  1.00  0.00           H
ATOM   1611 HD23 LEU   102     156.639 144.214 209.151  1.00  0.00           H
ATOM   1612  C   LEU   102     155.693 139.371 208.051  1.00  0.00           C
ATOM   1613  O   LEU   102     155.244 138.936 209.111  1.00  0.00           O
ATOM   1614  N   ALA   103     156.957 139.161 207.669  1.00  0.00           N
ATOM   1615  H   ALA   103     157.248 139.528 206.778  1.00  0.00           H
ATOM   1616  CA  ALA   103     157.995 138.573 208.520  1.00  0.00           C
ATOM   1617  HA  ALA   103     157.590 137.680 209.001  1.00  0.00           H
ATOM   1618  CB  ALA   103     159.166 138.140 207.627  1.00  0.00           C
ATOM   1619  HB1 ALA   103     159.589 139.005 207.113  1.00  0.00           H
ATOM   1620  HB2 ALA   103     158.822 137.413 206.891  1.00  0.00           H
ATOM   1621  HB3 ALA   103     159.941 137.680 208.241  1.00  0.00           H
ATOM   1622  C   ALA   103     158.408 139.563 209.634  1.00  0.00           C
ATOM   1623  O   ALA   103     159.434 140.239 209.551  1.00  0.00           O
ATOM   1624  N   GLU   104     157.543 139.700 210.641  1.00  0.00           N
ATOM   1625  H   GLU   104     156.693 139.151 210.573  1.00  0.00           H
ATOM   1626  CA  GLU   104     157.529 140.818 211.592  1.00  0.00           C
ATOM   1627  HA  GLU   104     157.257 141.709 211.025  1.00  0.00           H
ATOM   1628  CB  GLU   104     156.433 140.578 212.654  1.00  0.00           C
ATOM   1629  HB2 GLU   104     156.070 139.551 212.585  1.00  0.00           H
ATOM   1630  HB3 GLU   104     156.852 140.701 213.653  1.00  0.00           H
ATOM   1631  CG  GLU   104     155.234 141.529 212.506  1.00  0.00           C
ATOM   1632  HG2 GLU   104     154.923 141.563 211.460  1.00  0.00           H
ATOM   1633  HG3 GLU   104     154.404 141.120 213.087  1.00  0.00           H
ATOM   1634  CD  GLU   104     155.554 142.945 213.008  1.00  0.00           C
ATOM   1635  OE1 GLU   104     156.714 143.383 212.819  1.00  0.00           O
ATOM   1636  OE2 GLU   104     154.669 143.564 213.633  1.00  0.00           O
ATOM   1637  C   GLU   104     158.886 141.125 212.255  1.00  0.00           C
ATOM   1638  O   GLU   104     159.584 140.234 212.752  1.00  0.00           O
ATOM   1639  N   ARG   105     159.230 142.419 212.307  1.00  0.00           N
ATOM   1640  H   ARG   105     158.501 143.070 212.016  1.00  0.00           H
ATOM   1641  CA  ARG   105     160.422 142.992 212.963  1.00  0.00           C
ATOM   1642  HA  ARG   105     161.049 142.181 213.315  1.00  0.00           H
ATOM   1643  CB  ARG   105     161.255 143.823 211.970  1.00  0.00           C
ATOM   1644  HB2 ARG   105     160.612 144.582 211.521  1.00  0.00           H
ATOM   1645  HB3 ARG   105     162.043 144.344 212.517  1.00  0.00           H
ATOM   1646  CG  ARG   105     161.923 143.010 210.839  1.00  0.00           C
ATOM   1647  HG2 ARG   105     161.163 142.471 210.271  1.00  0.00           H
ATOM   1648  HG3 ARG   105     162.390 143.724 210.159  1.00  0.00           H
ATOM   1649  CD  ARG   105     163.018 142.026 211.299  1.00  0.00           C
ATOM   1650  HD2 ARG   105     163.612 141.741 210.429  1.00  0.00           H
ATOM   1651  HD3 ARG   105     163.675 142.537 212.006  1.00  0.00           H
ATOM   1652  NE  ARG   105     162.448 140.802 211.895  1.00  0.00           N
ATOM   1653  HE  ARG   105     161.556 140.499 211.524  1.00  0.00           H
ATOM   1654  CZ  ARG   105     162.869 140.144 212.962  1.00  0.00           C
ATOM   1655  NH1 ARG   105     164.000 140.386 213.563  1.00  0.00           N
ATOM   1656 HH11 ARG   105     164.620 141.094 213.210  1.00  0.00           H
ATOM   1657 HH12 ARG   105     164.256 139.867 214.385  1.00  0.00           H
ATOM   1658  NH2 ARG   105     162.096 139.232 213.467  1.00  0.00           N
ATOM   1659 HH21 ARG   105     161.151 139.171 213.110  1.00  0.00           H
ATOM   1660 HH22 ARG   105     162.327 138.777 214.347  1.00  0.00           H
ATOM   1661  C   ARG   105     160.116 143.731 214.267  1.00  0.00           C
ATOM   1662  O   ARG   105     161.041 143.997 215.021  1.00  0.00           O
ATOM   1663  N   ALA   106     158.843 143.839 214.647  1.00  0.00           N
ATOM   1664  H   ALA   106     158.112 143.702 213.949  1.00  0.00           H
ATOM   1665  CA  ALA   106     158.441 143.712 216.050  1.00  0.00           C
ATOM   1666  HA  ALA   106     159.145 144.280 216.661  1.00  0.00           H
ATOM   1667  CB  ALA   106     157.061 144.353 216.224  1.00  0.00           C
ATOM   1668  HB1 ALA   106     156.313 143.804 215.655  1.00  0.00           H
ATOM   1669  HB2 ALA   106     157.084 145.385 215.876  1.00  0.00           H
ATOM   1670  HB3 ALA   106     156.792 144.344 217.277  1.00  0.00           H
ATOM   1671  C   ALA   106     158.506 142.241 216.553  1.00  0.00           C
ATOM   1672  O   ALA   106     157.940 141.909 217.590  1.00  0.00           O
ATOM   1673  N   ASN   107     159.170 141.347 215.802  1.00  0.00           N
ATOM   1674  H   ASN   107     159.556 141.690 214.938  1.00  0.00           H
ATOM   1675  CA  ASN   107     159.531 139.966 216.151  1.00  0.00           C
ATOM   1676  HA  ASN   107     159.964 139.546 215.243  1.00  0.00           H
ATOM   1677  CB  ASN   107     160.652 139.985 217.213  1.00  0.00           C
ATOM   1678  HB2 ASN   107     161.319 140.829 217.041  1.00  0.00           H
ATOM   1679  HB3 ASN   107     160.217 140.102 218.206  1.00  0.00           H
ATOM   1680  CG  ASN   107     161.509 138.730 217.167  1.00  0.00           C
ATOM   1681  OD1 ASN   107     161.996 138.345 216.110  1.00  0.00           O
ATOM   1682  ND2 ASN   107     161.722 138.068 218.275  1.00  0.00           N
ATOM   1683 HD21 ASN   107     161.321 138.393 219.161  1.00  0.00           H
ATOM   1684 HD22 ASN   107     162.272 137.230 218.240  1.00  0.00           H
ATOM   1685  C   ASN   107     158.354 139.025 216.483  1.00  0.00           C
ATOM   1686  O   ASN   107     158.539 137.990 217.120  1.00  0.00           O
ATOM   1687  N   ARG   108     157.130 139.363 216.061  1.00  0.00           N
ATOM   1688  H   ARG   108     157.066 140.222 215.537  1.00  0.00           H
ATOM   1689  CA  ARG   108     155.865 138.799 216.582  1.00  0.00           C
ATOM   1690  HA  ARG   108     155.859 138.953 217.657  1.00  0.00           H
ATOM   1691  CB  ARG   108     154.663 139.568 216.002  1.00  0.00           C
ATOM   1692  HB2 ARG   108     154.580 139.344 214.937  1.00  0.00           H
ATOM   1693  HB3 ARG   108     153.752 139.215 216.487  1.00  0.00           H
ATOM   1694  CG  ARG   108     154.749 141.097 216.177  1.00  0.00           C
ATOM   1695  HG2 ARG   108     155.633 141.465 215.661  1.00  0.00           H
ATOM   1696  HG3 ARG   108     153.889 141.556 215.687  1.00  0.00           H
ATOM   1697  CD  ARG   108     154.811 141.575 217.637  1.00  0.00           C
ATOM   1698  HD2 ARG   108     155.442 140.924 218.242  1.00  0.00           H
ATOM   1699  HD3 ARG   108     155.277 142.559 217.637  1.00  0.00           H
ATOM   1700  NE  ARG   108     153.467 141.712 218.217  1.00  0.00           N
ATOM   1701  HE  ARG   108     152.939 142.511 217.920  1.00  0.00           H
ATOM   1702  CZ  ARG   108     152.815 140.842 218.966  1.00  0.00           C
ATOM   1703  NH1 ARG   108     153.313 139.752 219.464  1.00  0.00           N
ATOM   1704 HH11 ARG   108     154.305 139.542 219.473  1.00  0.00           H
ATOM   1705 HH12 ARG   108     152.676 139.151 219.988  1.00  0.00           H
ATOM   1706  NH2 ARG   108     151.569 141.058 219.243  1.00  0.00           N
ATOM   1707 HH21 ARG   108     151.066 141.855 218.917  1.00  0.00           H
ATOM   1708 HH22 ARG   108     151.104 140.300 219.754  1.00  0.00           H
ATOM   1709  C   ARG   108     155.685 137.281 216.444  1.00  0.00           C
ATOM   1710  O   ARG   108     154.865 136.706 217.149  1.00  0.00           O
ATOM   1711  N   GLY   109     156.506 136.605 215.639  1.00  0.00           N
ATOM   1712  H   GLY   109     157.191 137.136 215.127  1.00  0.00           H
ATOM   1713  CA  GLY   109     156.594 135.139 215.608  1.00  0.00           C
ATOM   1714  HA2 GLY   109     155.620 134.733 215.330  1.00  0.00           H
ATOM   1715  HA3 GLY   109     157.317 134.846 214.848  1.00  0.00           H
ATOM   1716  C   GLY   109     157.017 134.481 216.935  1.00  0.00           C
ATOM   1717  O   GLY   109     156.810 133.282 217.086  1.00  0.00           O
ATOM   1718  N   PHE   110     157.568 135.231 217.900  1.00  0.00           N
ATOM   1719  H   PHE   110     157.783 136.200 217.694  1.00  0.00           H
ATOM   1720  CA  PHE   110     157.814 134.775 219.283  1.00  0.00           C
ATOM   1721  HA  PHE   110     157.904 133.689 219.278  1.00  0.00           H
ATOM   1722  CB  PHE   110     159.165 135.326 219.776  1.00  0.00           C
ATOM   1723  HB2 PHE   110     159.227 136.391 219.561  1.00  0.00           H
ATOM   1724  HB3 PHE   110     159.224 135.216 220.860  1.00  0.00           H
ATOM   1725  CG  PHE   110     160.371 134.626 219.171  1.00  0.00           C
ATOM   1726  CD1 PHE   110     160.814 134.951 217.873  1.00  0.00           C
ATOM   1727  HD1 PHE   110     160.303 135.715 217.305  1.00  0.00           H
ATOM   1728  CE1 PHE   110     161.935 134.301 217.324  1.00  0.00           C
ATOM   1729  HE1 PHE   110     162.281 134.563 216.333  1.00  0.00           H
ATOM   1730  CZ  PHE   110     162.622 133.327 218.070  1.00  0.00           C
ATOM   1731  HZ  PHE   110     163.497 132.842 217.655  1.00  0.00           H
ATOM   1732  CE2 PHE   110     162.180 132.996 219.364  1.00  0.00           C
ATOM   1733  HE2 PHE   110     162.706 132.249 219.946  1.00  0.00           H
ATOM   1734  CD2 PHE   110     161.057 133.642 219.911  1.00  0.00           C
ATOM   1735  HD2 PHE   110     160.732 133.393 220.913  1.00  0.00           H
ATOM   1736  C   PHE   110     156.646 135.055 220.258  1.00  0.00           C
ATOM   1737  O   PHE   110     156.769 134.796 221.454  1.00  0.00           O
ATOM   1738  N   GLY   111     155.504 135.548 219.765  1.00  0.00           N
ATOM   1739  H   GLY   111     155.469 135.802 218.787  1.00  0.00           H
ATOM   1740  CA  GLY   111     154.229 135.543 220.489  1.00  0.00           C
ATOM   1741  HA2 GLY   111     154.394 135.796 221.536  1.00  0.00           H
ATOM   1742  HA3 GLY   111     153.577 136.305 220.058  1.00  0.00           H
ATOM   1743  C   GLY   111     153.515 134.182 220.420  1.00  0.00           C
ATOM   1744  O   GLY   111     154.137 133.133 220.239  1.00  0.00           O
ATOM   1745  N   ILE   112     152.186 134.198 220.520  1.00  0.00           N
ATOM   1746  H   ILE   112     151.743 135.109 220.616  1.00  0.00           H
ATOM   1747  CA  ILE   112     151.294 133.028 220.438  1.00  0.00           C
ATOM   1748  HA  ILE   112     151.893 132.182 220.123  1.00  0.00           H
ATOM   1749  CB  ILE   112     150.688 132.646 221.809  1.00  0.00           C
ATOM   1750  HB  ILE   112     149.855 131.964 221.633  1.00  0.00           H
ATOM   1751  CG2 ILE   112     151.756 131.859 222.577  1.00  0.00           C
ATOM   1752 HG21 ILE   112     152.132 131.034 221.971  1.00  0.00           H
ATOM   1753 HG22 ILE   112     151.340 131.431 223.488  1.00  0.00           H
ATOM   1754 HG23 ILE   112     152.581 132.526 222.825  1.00  0.00           H
ATOM   1755  CG1 ILE   112     150.162 133.852 222.624  1.00  0.00           C
ATOM   1756 HG12 ILE   112     150.956 134.586 222.761  1.00  0.00           H
ATOM   1757 HG13 ILE   112     149.358 134.332 222.066  1.00  0.00           H
ATOM   1758  CD1 ILE   112     149.630 133.484 224.015  1.00  0.00           C
ATOM   1759 HD11 ILE   112     148.827 132.751 223.927  1.00  0.00           H
ATOM   1760 HD12 ILE   112     149.256 134.383 224.501  1.00  0.00           H
ATOM   1761 HD13 ILE   112     150.424 133.084 224.643  1.00  0.00           H
ATOM   1762  C   ILE   112     150.222 133.150 219.353  1.00  0.00           C
ATOM   1763  O   ILE   112     150.099 132.230 218.542  1.00  0.00           O
ATOM   1764  N   VAL   113     149.505 134.274 219.245  1.00  0.00           N
ATOM   1765  H   VAL   113     149.723 135.059 219.860  1.00  0.00           H
ATOM   1766  CA  VAL   113     148.431 134.424 218.240  1.00  0.00           C
ATOM   1767  HA  VAL   113     147.803 133.536 218.318  1.00  0.00           H
ATOM   1768  CB  VAL   113     147.528 135.637 218.556  1.00  0.00           C
ATOM   1769  HB  VAL   113     147.355 135.664 219.631  1.00  0.00           H
ATOM   1770  CG1 VAL   113     148.113 136.992 218.144  1.00  0.00           C
ATOM   1771 HG11 VAL   113     147.453 137.790 218.482  1.00  0.00           H
ATOM   1772 HG12 VAL   113     149.082 137.131 218.615  1.00  0.00           H
ATOM   1773 HG13 VAL   113     148.223 137.057 217.062  1.00  0.00           H
ATOM   1774  CG2 VAL   113     146.170 135.494 217.864  1.00  0.00           C
ATOM   1775 HG21 VAL   113     145.714 134.538 218.123  1.00  0.00           H
ATOM   1776 HG22 VAL   113     146.287 135.551 216.783  1.00  0.00           H
ATOM   1777 HG23 VAL   113     145.504 136.291 218.195  1.00  0.00           H
ATOM   1778  C   VAL   113     148.980 134.445 216.805  1.00  0.00           C
ATOM   1779  O   VAL   113     148.286 134.063 215.864  1.00  0.00           O
ATOM   1780  N   PHE   114     150.251 134.827 216.646  1.00  0.00           N
ATOM   1781  H   PHE   114     150.727 135.155 217.474  1.00  0.00           H
ATOM   1782  CA  PHE   114     151.014 134.798 215.393  1.00  0.00           C
ATOM   1783  HA  PHE   114     150.361 135.036 214.552  1.00  0.00           H
ATOM   1784  CB  PHE   114     152.122 135.862 215.484  1.00  0.00           C
ATOM   1785  HB2 PHE   114     152.685 135.688 216.401  1.00  0.00           H
ATOM   1786  HB3 PHE   114     152.816 135.718 214.654  1.00  0.00           H
ATOM   1787  CG  PHE   114     151.663 137.308 215.463  1.00  0.00           C
ATOM   1788  CD1 PHE   114     151.780 138.065 214.281  1.00  0.00           C
ATOM   1789  HD1 PHE   114     152.190 137.612 213.390  1.00  0.00           H
ATOM   1790  CE1 PHE   114     151.365 139.409 214.255  1.00  0.00           C
ATOM   1791  HE1 PHE   114     151.462 139.989 213.348  1.00  0.00           H
ATOM   1792  CZ  PHE   114     150.800 139.991 215.403  1.00  0.00           C
ATOM   1793  HZ  PHE   114     150.454 141.015 215.376  1.00  0.00           H
ATOM   1794  CE2 PHE   114     150.683 139.237 216.584  1.00  0.00           C
ATOM   1795  HE2 PHE   114     150.235 139.665 217.467  1.00  0.00           H
ATOM   1796  CD2 PHE   114     151.145 137.911 216.624  1.00  0.00           C
ATOM   1797  HD2 PHE   114     151.091 137.357 217.551  1.00  0.00           H
ATOM   1798  C   PHE   114     151.697 133.450 215.093  1.00  0.00           C
ATOM   1799  O   PHE   114     152.071 133.215 213.946  1.00  0.00           O
ATOM   1800  N   SER   115     151.977 132.611 216.098  1.00  0.00           N
ATOM   1801  H   SER   115     151.543 132.747 217.002  1.00  0.00           H
ATOM   1802  CA  SER   115     153.141 131.711 216.030  1.00  0.00           C
ATOM   1803  HA  SER   115     153.771 132.067 215.215  1.00  0.00           H
ATOM   1804  CB  SER   115     154.014 131.861 217.279  1.00  0.00           C
ATOM   1805  HB2 SER   115     154.972 131.367 217.112  1.00  0.00           H
ATOM   1806  HB3 SER   115     154.202 132.922 217.452  1.00  0.00           H
ATOM   1807  OG  SER   115     153.417 131.307 218.425  1.00  0.00           O
ATOM   1808  HG  SER   115     153.751 131.829 219.184  1.00  0.00           H
ATOM   1809  C   SER   115     152.846 130.243 215.693  1.00  0.00           C
ATOM   1810  O   SER   115     151.727 129.735 215.809  1.00  0.00           O
ATOM   1811  N   ASN   116     153.919 129.576 215.256  1.00  0.00           N
ATOM   1812  H   ASN   116     154.799 130.072 215.290  1.00  0.00           H
ATOM   1813  CA  ASN   116     154.032 128.187 214.810  1.00  0.00           C
ATOM   1814  HA  ASN   116     153.219 127.591 215.231  1.00  0.00           H
ATOM   1815  CB  ASN   116     153.964 128.152 213.271  1.00  0.00           C
ATOM   1816  HB2 ASN   116     154.700 128.840 212.857  1.00  0.00           H
ATOM   1817  HB3 ASN   116     154.211 127.152 212.918  1.00  0.00           H
ATOM   1818  CG  ASN   116     152.591 128.476 212.720  1.00  0.00           C
ATOM   1819  OD1 ASN   116     151.637 127.757 212.960  1.00  0.00           O
ATOM   1820  ND2 ASN   116     152.458 129.526 211.944  1.00  0.00           N
ATOM   1821 HD21 ASN   116     153.226 130.141 211.757  1.00  0.00           H
ATOM   1822 HD22 ASN   116     151.563 129.670 211.483  1.00  0.00           H
ATOM   1823  C   ASN   116     155.377 127.609 215.299  1.00  0.00           C
ATOM   1824  O   ASN   116     156.248 128.364 215.729  1.00  0.00           O
ATOM   1825  N   GLY   117     155.575 126.291 215.201  1.00  0.00           N
ATOM   1826  H   GLY   117     154.827 125.718 214.842  1.00  0.00           H
ATOM   1827  CA  GLY   117     156.775 125.617 215.725  1.00  0.00           C
ATOM   1828  HA2 GLY   117     156.896 124.654 215.228  1.00  0.00           H
ATOM   1829  HA3 GLY   117     157.659 126.218 215.509  1.00  0.00           H
ATOM   1830  C   GLY   117     156.710 125.374 217.240  1.00  0.00           C
ATOM   1831  O   GLY   117     155.681 125.643 217.870  1.00  0.00           O
ATOM   1832  N   LYS   118     157.791 124.840 217.837  1.00  0.00           N
ATOM   1833  H   LYS   118     158.615 124.658 217.277  1.00  0.00           H
ATOM   1834  CA  LYS   118     157.762 124.372 219.242  1.00  0.00           C
ATOM   1835  HA  LYS   118     156.967 123.629 219.313  1.00  0.00           H
ATOM   1836  CB  LYS   118     159.065 123.648 219.644  1.00  0.00           C
ATOM   1837  HB2 LYS   118     158.840 123.067 220.540  1.00  0.00           H
ATOM   1838  HB3 LYS   118     159.346 122.943 218.859  1.00  0.00           H
ATOM   1839  CG  LYS   118     160.265 124.556 219.964  1.00  0.00           C
ATOM   1840  HG2 LYS   118     160.607 125.059 219.059  1.00  0.00           H
ATOM   1841  HG3 LYS   118     159.950 125.303 220.688  1.00  0.00           H
ATOM   1842  CD  LYS   118     161.417 123.748 220.584  1.00  0.00           C
ATOM   1843  HD2 LYS   118     161.025 123.127 221.393  1.00  0.00           H
ATOM   1844  HD3 LYS   118     161.843 123.089 219.826  1.00  0.00           H
ATOM   1845  CE  LYS   118     162.531 124.632 221.165  1.00  0.00           C
ATOM   1846  HE2 LYS   118     163.292 123.978 221.597  1.00  0.00           H
ATOM   1847  HE3 LYS   118     162.985 125.217 220.361  1.00  0.00           H
ATOM   1848  NZ  LYS   118     162.012 125.543 222.211  1.00  0.00           N
ATOM   1849  HZ1 LYS   118     161.486 126.316 221.799  1.00  0.00           H
ATOM   1850  HZ2 LYS   118     162.713 125.946 222.807  1.00  0.00           H
ATOM   1851  HZ3 LYS   118     161.344 125.082 222.839  1.00  0.00           H
ATOM   1852  C   LYS   118     157.360 125.473 220.232  1.00  0.00           C
ATOM   1853  O   LYS   118     156.507 125.226 221.083  1.00  0.00           O
ATOM   1854  N   LYS   119     157.855 126.701 220.012  1.00  0.00           N
ATOM   1855  H   LYS   119     158.598 126.764 219.333  1.00  0.00           H
ATOM   1856  CA  LYS   119     157.500 127.946 220.721  1.00  0.00           C
ATOM   1857  HA  LYS   119     158.026 127.953 221.679  1.00  0.00           H
ATOM   1858  CB  LYS   119     157.949 129.202 219.933  1.00  0.00           C
ATOM   1859  HB2 LYS   119     157.241 130.010 220.125  1.00  0.00           H
ATOM   1860  HB3 LYS   119     158.904 129.536 220.327  1.00  0.00           H
ATOM   1861  CG  LYS   119     158.088 129.006 218.412  1.00  0.00           C
ATOM   1862  HG2 LYS   119     159.000 128.445 218.202  1.00  0.00           H
ATOM   1863  HG3 LYS   119     157.238 128.423 218.062  1.00  0.00           H
ATOM   1864  CD  LYS   119     158.105 130.317 217.612  1.00  0.00           C
ATOM   1865  HD2 LYS   119     158.218 130.080 216.553  1.00  0.00           H
ATOM   1866  HD3 LYS   119     157.133 130.792 217.738  1.00  0.00           H
ATOM   1867  CE  LYS   119     159.185 131.331 218.012  1.00  0.00           C
ATOM   1868  HE2 LYS   119     159.009 132.251 217.448  1.00  0.00           H
ATOM   1869  HE3 LYS   119     159.084 131.565 219.075  1.00  0.00           H
ATOM   1870  NZ  LYS   119     160.556 130.846 217.741  1.00  0.00           N
ATOM   1871  HZ1 LYS   119     160.820 130.114 218.407  1.00  0.00           H
ATOM   1872  HZ2 LYS   119     161.229 131.580 217.903  1.00  0.00           H
ATOM   1873  HZ3 LYS   119     160.679 130.492 216.793  1.00  0.00           H
ATOM   1874  C   LYS   119     156.015 128.056 221.054  1.00  0.00           C
ATOM   1875  O   LYS   119     155.692 128.345 222.202  1.00  0.00           O
ATOM   1876  N   TRP   120     155.114 127.793 220.097  1.00  0.00           N
ATOM   1877  H   TRP   120     155.433 127.489 219.188  1.00  0.00           H
ATOM   1878  CA  TRP   120     153.678 127.897 220.366  1.00  0.00           C
ATOM   1879  HA  TRP   120     153.496 128.882 220.801  1.00  0.00           H
ATOM   1880  CB  TRP   120     152.831 127.817 219.088  1.00  0.00           C
ATOM   1881  HB2 TRP   120     153.182 128.566 218.378  1.00  0.00           H
ATOM   1882  HB3 TRP   120     152.956 126.836 218.629  1.00  0.00           H
ATOM   1883  CG  TRP   120     151.372 128.055 219.356  1.00  0.00           C
ATOM   1884  CD1 TRP   120     150.832 129.261 219.641  1.00  0.00           C
ATOM   1885  HD1 TRP   120     151.384 130.190 219.637  1.00  0.00           H
ATOM   1886  NE1 TRP   120     149.503 129.120 219.988  1.00  0.00           N
ATOM   1887  HE1 TRP   120     148.904 129.892 220.281  1.00  0.00           H
ATOM   1888  CE2 TRP   120     149.103 127.806 219.903  1.00  0.00           C
ATOM   1889  CZ2 TRP   120     147.874 127.171 220.128  1.00  0.00           C
ATOM   1890  HZ2 TRP   120     147.018 127.757 220.425  1.00  0.00           H
ATOM   1891  CH2 TRP   120     147.781 125.781 219.948  1.00  0.00           C
ATOM   1892  HH2 TRP   120     146.841 125.271 220.108  1.00  0.00           H
ATOM   1893  CZ3 TRP   120     148.913 125.054 219.539  1.00  0.00           C
ATOM   1894  HZ3 TRP   120     148.828 123.988 219.385  1.00  0.00           H
ATOM   1895  CE3 TRP   120     150.142 125.706 219.309  1.00  0.00           C
ATOM   1896  HE3 TRP   120     150.998 125.149 218.965  1.00  0.00           H
ATOM   1897  CD2 TRP   120     150.274 127.098 219.496  1.00  0.00           C
ATOM   1898  C   TRP   120     153.228 126.880 221.420  1.00  0.00           C
ATOM   1899  O   TRP   120     152.692 127.282 222.445  1.00  0.00           O
ATOM   1900  N   LYS   121     153.516 125.582 221.246  1.00  0.00           N
ATOM   1901  H   LYS   121     154.090 125.333 220.452  1.00  0.00           H
ATOM   1902  CA  LYS   121     153.172 124.539 222.238  1.00  0.00           C
ATOM   1903  HA  LYS   121     152.089 124.493 222.356  1.00  0.00           H
ATOM   1904  CB  LYS   121     153.707 123.164 221.782  1.00  0.00           C
ATOM   1905  HB2 LYS   121     154.798 123.191 221.810  1.00  0.00           H
ATOM   1906  HB3 LYS   121     153.389 122.411 222.506  1.00  0.00           H
ATOM   1907  CG  LYS   121     153.307 122.688 220.377  1.00  0.00           C
ATOM   1908  HG2 LYS   121     153.614 123.428 219.636  1.00  0.00           H
ATOM   1909  HG3 LYS   121     153.864 121.772 220.174  1.00  0.00           H
ATOM   1910  CD  LYS   121     151.812 122.387 220.207  1.00  0.00           C
ATOM   1911  HD2 LYS   121     151.486 121.691 220.983  1.00  0.00           H
ATOM   1912  HD3 LYS   121     151.236 123.307 220.288  1.00  0.00           H
ATOM   1913  CE  LYS   121     151.615 121.738 218.831  1.00  0.00           C
ATOM   1914  HE2 LYS   121     152.062 122.366 218.057  1.00  0.00           H
ATOM   1915  HE3 LYS   121     152.143 120.780 218.835  1.00  0.00           H
ATOM   1916  NZ  LYS   121     150.196 121.485 218.508  1.00  0.00           N
ATOM   1917  HZ1 LYS   121     150.121 120.660 217.907  1.00  0.00           H
ATOM   1918  HZ2 LYS   121     149.706 122.249 218.055  1.00  0.00           H
ATOM   1919  HZ3 LYS   121     149.648 121.122 219.292  1.00  0.00           H
ATOM   1920  C   LYS   121     153.759 124.868 223.621  1.00  0.00           C
ATOM   1921  O   LYS   121     153.072 124.797 224.639  1.00  0.00           O
ATOM   1922  N   GLU   122     155.030 125.253 223.618  1.00  0.00           N
ATOM   1923  H   GLU   122     155.483 125.295 222.711  1.00  0.00           H
ATOM   1924  CA  GLU   122     155.899 125.470 224.775  1.00  0.00           C
ATOM   1925  HA  GLU   122     155.879 124.581 225.405  1.00  0.00           H
ATOM   1926  CB  GLU   122     157.314 125.608 224.180  1.00  0.00           C
ATOM   1927  HB2 GLU   122     157.441 124.743 223.529  1.00  0.00           H
ATOM   1928  HB3 GLU   122     157.358 126.499 223.554  1.00  0.00           H
ATOM   1929  CG  GLU   122     158.506 125.639 225.144  1.00  0.00           C
ATOM   1930  HG2 GLU   122     158.559 126.631 225.590  1.00  0.00           H
ATOM   1931  HG3 GLU   122     158.349 124.902 225.935  1.00  0.00           H
ATOM   1932  CD  GLU   122     159.830 125.330 224.414  1.00  0.00           C
ATOM   1933  OE1 GLU   122     159.860 124.461 223.512  1.00  0.00           O
ATOM   1934  OE2 GLU   122     160.856 125.992 224.681  1.00  0.00           O
ATOM   1935  C   GLU   122     155.448 126.659 225.646  1.00  0.00           C
ATOM   1936  O   GLU   122     155.238 126.502 226.852  1.00  0.00           O
ATOM   1937  N   ILE   123     155.205 127.829 225.044  1.00  0.00           N
ATOM   1938  H   ILE   123     155.385 127.903 224.045  1.00  0.00           H
ATOM   1939  CA  ILE   123     154.802 129.049 225.765  1.00  0.00           C
ATOM   1940  HA  ILE   123     155.251 129.001 226.756  1.00  0.00           H
ATOM   1941  CB  ILE   123     155.420 130.274 225.048  1.00  0.00           C
ATOM   1942  HB  ILE   123     156.359 129.951 224.592  1.00  0.00           H
ATOM   1943  CG2 ILE   123     154.516 130.809 223.931  1.00  0.00           C
ATOM   1944 HG21 ILE   123     154.130 129.994 223.322  1.00  0.00           H
ATOM   1945 HG22 ILE   123     155.077 131.476 223.276  1.00  0.00           H
ATOM   1946 HG23 ILE   123     153.690 131.357 224.380  1.00  0.00           H
ATOM   1947  CG1 ILE   123     155.772 131.403 226.040  1.00  0.00           C
ATOM   1948 HG12 ILE   123     154.861 131.833 226.459  1.00  0.00           H
ATOM   1949 HG13 ILE   123     156.362 130.985 226.857  1.00  0.00           H
ATOM   1950  CD1 ILE   123     156.607 132.512 225.381  1.00  0.00           C
ATOM   1951 HD11 ILE   123     157.494 132.076 224.920  1.00  0.00           H
ATOM   1952 HD12 ILE   123     156.922 133.240 226.124  1.00  0.00           H
ATOM   1953 HD13 ILE   123     156.024 133.037 224.624  1.00  0.00           H
ATOM   1954  C   ILE   123     153.275 129.137 225.981  1.00  0.00           C
ATOM   1955  O   ILE   123     152.812 129.653 227.006  1.00  0.00           O
ATOM   1956  N   ARG   124     152.456 128.572 225.077  1.00  0.00           N
ATOM   1957  H   ARG   124     152.869 128.163 224.240  1.00  0.00           H
ATOM   1958  CA  ARG   124     150.986 128.517 225.224  1.00  0.00           C
ATOM   1959  HA  ARG   124     150.651 129.508 225.528  1.00  0.00           H
ATOM   1960  CB  ARG   124     150.342 128.222 223.852  1.00  0.00           C
ATOM   1961  HB2 ARG   124     150.908 128.784 223.108  1.00  0.00           H
ATOM   1962  HB3 ARG   124     150.432 127.159 223.620  1.00  0.00           H
ATOM   1963  CG  ARG   124     148.892 128.669 223.627  1.00  0.00           C
ATOM   1964  HG2 ARG   124     148.779 129.704 223.951  1.00  0.00           H
ATOM   1965  HG3 ARG   124     148.715 128.639 222.555  1.00  0.00           H
ATOM   1966  CD  ARG   124     147.831 127.802 224.309  1.00  0.00           C
ATOM   1967  HD2 ARG   124     148.321 126.982 224.835  1.00  0.00           H
ATOM   1968  HD3 ARG   124     147.319 128.418 225.050  1.00  0.00           H
ATOM   1969  NE  ARG   124     146.837 127.225 223.374  1.00  0.00           N
ATOM   1970  HE  ARG   124     146.931 126.248 223.155  1.00  0.00           H
ATOM   1971  CZ  ARG   124     145.717 127.802 222.976  1.00  0.00           C
ATOM   1972  NH1 ARG   124     145.512 129.082 223.040  1.00  0.00           N
ATOM   1973 HH11 ARG   124     146.314 129.699 223.034  1.00  0.00           H
ATOM   1974 HH12 ARG   124     144.608 129.428 222.739  1.00  0.00           H
ATOM   1975  NH2 ARG   124     144.737 127.110 222.479  1.00  0.00           N
ATOM   1976 HH21 ARG   124     144.802 126.121 222.275  1.00  0.00           H
ATOM   1977 HH22 ARG   124     143.868 127.612 222.321  1.00  0.00           H
ATOM   1978  C   ARG   124     150.576 127.550 226.344  1.00  0.00           C
ATOM   1979  O   ARG   124     149.588 127.823 227.022  1.00  0.00           O
ATOM   1980  N   ARG   125     151.368 126.504 226.644  1.00  0.00           N
ATOM   1981  H   ARG   125     152.132 126.291 226.008  1.00  0.00           H
ATOM   1982  CA  ARG   125     151.221 125.687 227.872  1.00  0.00           C
ATOM   1983  HA  ARG   125     150.215 125.263 227.883  1.00  0.00           H
ATOM   1984  CB  ARG   125     152.230 124.515 227.864  1.00  0.00           C
ATOM   1985  HB2 ARG   125     151.910 123.806 227.097  1.00  0.00           H
ATOM   1986  HB3 ARG   125     153.215 124.886 227.580  1.00  0.00           H
ATOM   1987  CG  ARG   125     152.369 123.772 229.213  1.00  0.00           C
ATOM   1988  HG2 ARG   125     152.981 124.376 229.885  1.00  0.00           H
ATOM   1989  HG3 ARG   125     151.383 123.634 229.661  1.00  0.00           H
ATOM   1990  CD  ARG   125     153.027 122.391 229.026  1.00  0.00           C
ATOM   1991  HD2 ARG   125     152.275 121.680 228.677  1.00  0.00           H
ATOM   1992  HD3 ARG   125     153.780 122.478 228.239  1.00  0.00           H
ATOM   1993  NE  ARG   125     153.709 121.850 230.226  1.00  0.00           N
ATOM   1994  HE  ARG   125     154.670 121.545 230.087  1.00  0.00           H
ATOM   1995  CZ  ARG   125     153.242 121.530 231.422  1.00  0.00           C
ATOM   1996  NH1 ARG   125     152.026 121.783 231.818  1.00  0.00           N
ATOM   1997 HH11 ARG   125     151.392 122.256 231.204  1.00  0.00           H
ATOM   1998 HH12 ARG   125     151.745 121.516 232.744  1.00  0.00           H
ATOM   1999  NH2 ARG   125     154.039 120.925 232.252  1.00  0.00           N
ATOM   2000 HH21 ARG   125     154.965 120.674 231.920  1.00  0.00           H
ATOM   2001 HH22 ARG   125     153.759 120.592 233.169  1.00  0.00           H
ATOM   2002  C   ARG   125     151.318 126.542 229.138  1.00  0.00           C
ATOM   2003  O   ARG   125     150.407 126.495 229.957  1.00  0.00           O
ATOM   2004  N   PHE   126     152.363 127.357 229.288  1.00  0.00           N
ATOM   2005  H   PHE   126     153.076 127.363 228.571  1.00  0.00           H
ATOM   2006  CA  PHE   126     152.495 128.278 230.431  1.00  0.00           C
ATOM   2007  HA  PHE   126     152.424 127.710 231.359  1.00  0.00           H
ATOM   2008  CB  PHE   126     153.879 128.929 230.379  1.00  0.00           C
ATOM   2009  HB2 PHE   126     154.625 128.150 230.533  1.00  0.00           H
ATOM   2010  HB3 PHE   126     154.035 129.357 229.388  1.00  0.00           H
ATOM   2011  CG  PHE   126     154.102 130.021 231.406  1.00  0.00           C
ATOM   2012  CD1 PHE   126     154.582 129.695 232.689  1.00  0.00           C
ATOM   2013  HD1 PHE   126     154.787 128.668 232.950  1.00  0.00           H
ATOM   2014  CE1 PHE   126     154.795 130.709 233.638  1.00  0.00           C
ATOM   2015  HE1 PHE   126     155.162 130.465 234.626  1.00  0.00           H
ATOM   2016  CZ  PHE   126     154.509 132.044 233.310  1.00  0.00           C
ATOM   2017  HZ  PHE   126     154.631 132.823 234.045  1.00  0.00           H
ATOM   2018  CE2 PHE   126     154.031 132.372 232.033  1.00  0.00           C
ATOM   2019  HE2 PHE   126     153.806 133.403 231.798  1.00  0.00           H
ATOM   2020  CD2 PHE   126     153.835 131.364 231.076  1.00  0.00           C
ATOM   2021  HD2 PHE   126     153.467 131.626 230.094  1.00  0.00           H
ATOM   2022  C   PHE   126     151.382 129.340 230.475  1.00  0.00           C
ATOM   2023  O   PHE   126     150.904 129.698 231.554  1.00  0.00           O
ATOM   2024  N   SER   127     150.921 129.791 229.306  1.00  0.00           N
ATOM   2025  H   SER   127     151.401 129.504 228.464  1.00  0.00           H
ATOM   2026  CA  SER   127     149.779 130.706 229.189  1.00  0.00           C
ATOM   2027  HA  SER   127     149.984 131.600 229.780  1.00  0.00           H
ATOM   2028  CB  SER   127     149.590 131.149 227.735  1.00  0.00           C
ATOM   2029  HB2 SER   127     149.271 130.305 227.125  1.00  0.00           H
ATOM   2030  HB3 SER   127     148.810 131.911 227.698  1.00  0.00           H
ATOM   2031  OG  SER   127     150.787 131.693 227.207  1.00  0.00           O
ATOM   2032  HG  SER   127     151.495 131.032 227.191  1.00  0.00           H
ATOM   2033  C   SER   127     148.485 130.083 229.737  1.00  0.00           C
ATOM   2034  O   SER   127     147.755 130.756 230.459  1.00  0.00           O
ATOM   2035  N   LEU   128     148.228 128.787 229.488  1.00  0.00           N
ATOM   2036  H   LEU   128     148.840 128.278 228.861  1.00  0.00           H
ATOM   2037  CA  LEU   128     147.136 128.059 230.153  1.00  0.00           C
ATOM   2038  HA  LEU   128     146.207 128.613 230.003  1.00  0.00           H
ATOM   2039  CB  LEU   128     146.964 126.628 229.594  1.00  0.00           C
ATOM   2040  HB2 LEU   128     147.916 126.236 229.235  1.00  0.00           H
ATOM   2041  HB3 LEU   128     146.645 125.988 230.419  1.00  0.00           H
ATOM   2042  CG  LEU   128     145.894 126.507 228.496  1.00  0.00           C
ATOM   2043  HG  LEU   128     145.029 127.115 228.760  1.00  0.00           H
ATOM   2044  CD1 LEU   128     146.428 126.953 227.141  1.00  0.00           C
ATOM   2045 HD11 LEU   128     146.809 127.968 227.221  1.00  0.00           H
ATOM   2046 HD12 LEU   128     145.625 126.929 226.405  1.00  0.00           H
ATOM   2047 HD13 LEU   128     147.237 126.293 226.830  1.00  0.00           H
ATOM   2048  CD2 LEU   128     145.433 125.056 228.354  1.00  0.00           C
ATOM   2049 HD21 LEU   128     146.278 124.413 228.106  1.00  0.00           H
ATOM   2050 HD22 LEU   128     144.989 124.719 229.291  1.00  0.00           H
ATOM   2051 HD23 LEU   128     144.678 124.984 227.572  1.00  0.00           H
ATOM   2052  C   LEU   128     147.349 127.988 231.671  1.00  0.00           C
ATOM   2053  O   LEU   128     146.412 128.273 232.410  1.00  0.00           O
ATOM   2054  N   MET   129     148.550 127.628 232.144  1.00  0.00           N
ATOM   2055  H   MET   129     149.272 127.372 231.482  1.00  0.00           H
ATOM   2056  CA  MET   129     148.807 127.494 233.588  1.00  0.00           C
ATOM   2057  HA  MET   129     148.118 126.748 233.987  1.00  0.00           H
ATOM   2058  CB  MET   129     150.247 127.025 233.882  1.00  0.00           C
ATOM   2059  HB2 MET   129     150.946 127.808 233.588  1.00  0.00           H
ATOM   2060  HB3 MET   129     150.348 126.894 234.958  1.00  0.00           H
ATOM   2061  CG  MET   129     150.698 125.717 233.216  1.00  0.00           C
ATOM   2062  HG2 MET   129     150.918 125.928 232.176  1.00  0.00           H
ATOM   2063  HG3 MET   129     151.639 125.417 233.678  1.00  0.00           H
ATOM   2064  SD  MET   129     149.570 124.294 233.264  1.00  0.00           S
ATOM   2065  CE  MET   129     149.420 124.034 235.053  1.00  0.00           C
ATOM   2066  HE1 MET   129     148.990 124.920 235.516  1.00  0.00           H
ATOM   2067  HE2 MET   129     148.763 123.185 235.246  1.00  0.00           H
ATOM   2068  HE3 MET   129     150.400 123.837 235.487  1.00  0.00           H
ATOM   2069  C   MET   129     148.524 128.808 234.335  1.00  0.00           C
ATOM   2070  O   MET   129     147.757 128.822 235.296  1.00  0.00           O
ATOM   2071  N   THR   130     149.098 129.920 233.869  1.00  0.00           N
ATOM   2072  H   THR   130     149.676 129.847 233.041  1.00  0.00           H
ATOM   2073  CA  THR   130     148.959 131.238 234.514  1.00  0.00           C
ATOM   2074  HA  THR   130     149.226 131.133 235.566  1.00  0.00           H
ATOM   2075  CB  THR   130     149.897 132.285 233.898  1.00  0.00           C
ATOM   2076  HB  THR   130     149.577 133.274 234.225  1.00  0.00           H
ATOM   2077  CG2 THR   130     151.338 132.089 234.347  1.00  0.00           C
ATOM   2078 HG21 THR   130     151.944 132.907 233.959  1.00  0.00           H
ATOM   2079 HG22 THR   130     151.727 131.137 233.985  1.00  0.00           H
ATOM   2080 HG23 THR   130     151.387 132.106 235.436  1.00  0.00           H
ATOM   2081  OG1 THR   130     149.875 132.247 232.489  1.00  0.00           O
ATOM   2082  HG1 THR   130     150.373 131.467 232.208  1.00  0.00           H
ATOM   2083  C   THR   130     147.528 131.768 234.492  1.00  0.00           C
ATOM   2084  O   THR   130     147.026 132.179 235.539  1.00  0.00           O
ATOM   2085  N   LEU   131     146.830 131.723 233.351  1.00  0.00           N
ATOM   2086  H   LEU   131     147.290 131.408 232.502  1.00  0.00           H
ATOM   2087  CA  LEU   131     145.433 132.178 233.270  1.00  0.00           C
ATOM   2088  HA  LEU   131     145.348 133.120 233.815  1.00  0.00           H
ATOM   2089  CB  LEU   131     145.039 132.452 231.807  1.00  0.00           C
ATOM   2090  HB2 LEU   131     145.470 131.695 231.152  1.00  0.00           H
ATOM   2091  HB3 LEU   131     143.954 132.371 231.724  1.00  0.00           H
ATOM   2092  CG  LEU   131     145.429 133.865 231.325  1.00  0.00           C
ATOM   2093  HG  LEU   131     144.913 134.596 231.948  1.00  0.00           H
ATOM   2094  CD1 LEU   131     146.929 134.172 231.375  1.00  0.00           C
ATOM   2095 HD11 LEU   131     147.277 134.184 232.406  1.00  0.00           H
ATOM   2096 HD12 LEU   131     147.123 135.152 230.943  1.00  0.00           H
ATOM   2097 HD13 LEU   131     147.484 133.417 230.818  1.00  0.00           H
ATOM   2098  CD2 LEU   131     144.965 134.067 229.885  1.00  0.00           C
ATOM   2099 HD21 LEU   131     145.514 133.398 229.225  1.00  0.00           H
ATOM   2100 HD22 LEU   131     143.899 133.854 229.805  1.00  0.00           H
ATOM   2101 HD23 LEU   131     145.142 135.097 229.587  1.00  0.00           H
ATOM   2102  C   LEU   131     144.459 131.217 233.978  1.00  0.00           C
ATOM   2103  O   LEU   131     143.401 131.655 234.423  1.00  0.00           O
ATOM   2104  N   ARG   132     144.834 129.947 234.189  1.00  0.00           N
ATOM   2105  H   ARG   132     145.682 129.622 233.733  1.00  0.00           H
ATOM   2106  CA  ARG   132     144.155 129.014 235.110  1.00  0.00           C
ATOM   2107  HA  ARG   132     143.118 129.346 235.180  1.00  0.00           H
ATOM   2108  CB  ARG   132     144.144 127.600 234.494  1.00  0.00           C
ATOM   2109  HB2 ARG   132     144.073 127.712 233.412  1.00  0.00           H
ATOM   2110  HB3 ARG   132     145.086 127.091 234.705  1.00  0.00           H
ATOM   2111  CG  ARG   132     142.959 126.736 234.975  1.00  0.00           C
ATOM   2112  HG2 ARG   132     143.285 126.125 235.818  1.00  0.00           H
ATOM   2113  HG3 ARG   132     142.147 127.375 235.324  1.00  0.00           H
ATOM   2114  CD  ARG   132     142.394 125.819 233.874  1.00  0.00           C
ATOM   2115  HD2 ARG   132     143.190 125.174 233.494  1.00  0.00           H
ATOM   2116  HD3 ARG   132     141.626 125.187 234.324  1.00  0.00           H
ATOM   2117  NE  ARG   132     141.811 126.605 232.764  1.00  0.00           N
ATOM   2118  HE  ARG   132     142.220 127.506 232.590  1.00  0.00           H
ATOM   2119  CZ  ARG   132     140.776 126.299 232.001  1.00  0.00           C
ATOM   2120  NH1 ARG   132     140.143 125.163 232.066  1.00  0.00           N
ATOM   2121 HH11 ARG   132     140.496 124.408 232.654  1.00  0.00           H
ATOM   2122 HH12 ARG   132     139.311 125.023 231.508  1.00  0.00           H
ATOM   2123  NH2 ARG   132     140.352 127.169 231.135  1.00  0.00           N
ATOM   2124 HH21 ARG   132     140.759 128.078 230.992  1.00  0.00           H
ATOM   2125 HH22 ARG   132     139.556 126.994 230.520  1.00  0.00           H
ATOM   2126  C   ARG   132     144.681 129.100 236.558  1.00  0.00           C
ATOM   2127  O   ARG   132     144.553 128.155 237.327  1.00  0.00           O
ATOM   2128  N   ASN   133     145.234 130.258 236.932  1.00  0.00           N
ATOM   2129  H   ASN   133     145.361 130.941 236.197  1.00  0.00           H
ATOM   2130  CA  ASN   133     145.660 130.679 238.275  1.00  0.00           C
ATOM   2131  HA  ASN   133     145.992 131.710 238.144  1.00  0.00           H
ATOM   2132  CB  ASN   133     144.437 130.721 239.225  1.00  0.00           C
ATOM   2133  HB2 ASN   133     143.514 130.733 238.645  1.00  0.00           H
ATOM   2134  HB3 ASN   133     144.425 129.819 239.838  1.00  0.00           H
ATOM   2135  CG  ASN   133     144.401 131.936 240.141  1.00  0.00           C
ATOM   2136  OD1 ASN   133     143.423 132.664 240.186  1.00  0.00           O
ATOM   2137  ND2 ASN   133     145.461 132.228 240.859  1.00  0.00           N
ATOM   2138 HD21 ASN   133     146.259 131.602 240.832  1.00  0.00           H
ATOM   2139 HD22 ASN   133     145.442 133.029 241.466  1.00  0.00           H
ATOM   2140  C   ASN   133     146.887 129.964 238.885  1.00  0.00           C
ATOM   2141  O   ASN   133     147.271 130.297 240.009  1.00  0.00           O
ATOM   2142  N   PHE   134     147.559 129.046 238.188  1.00  0.00           N
ATOM   2143  H   PHE   134     147.284 128.848 237.232  1.00  0.00           H
ATOM   2144  CA  PHE   134     148.801 128.452 238.697  1.00  0.00           C
ATOM   2145  HA  PHE   134     148.623 128.104 239.715  1.00  0.00           H
ATOM   2146  CB  PHE   134     149.229 127.238 237.861  1.00  0.00           C
ATOM   2147  HB2 PHE   134     149.328 127.545 236.825  1.00  0.00           H
ATOM   2148  HB3 PHE   134     150.222 126.932 238.192  1.00  0.00           H
ATOM   2149  CG  PHE   134     148.311 126.030 237.933  1.00  0.00           C
ATOM   2150  CD1 PHE   134     148.675 124.916 238.716  1.00  0.00           C
ATOM   2151  HD1 PHE   134     149.592 124.928 239.287  1.00  0.00           H
ATOM   2152  CE1 PHE   134     147.849 123.779 238.757  1.00  0.00           C
ATOM   2153  HE1 PHE   134     148.129 122.926 239.362  1.00  0.00           H
ATOM   2154  CZ  PHE   134     146.654 123.749 238.019  1.00  0.00           C
ATOM   2155  HZ  PHE   134     146.014 122.878 238.060  1.00  0.00           H
ATOM   2156  CE2 PHE   134     146.286 124.858 237.238  1.00  0.00           C
ATOM   2157  HE2 PHE   134     145.360 124.843 236.682  1.00  0.00           H
ATOM   2158  CD2 PHE   134     147.114 125.993 237.192  1.00  0.00           C
ATOM   2159  HD2 PHE   134     146.819 126.837 236.588  1.00  0.00           H
ATOM   2160  C   PHE   134     149.923 129.504 238.734  1.00  0.00           C
ATOM   2161  O   PHE   134     150.179 130.194 237.749  1.00  0.00           O
ATOM   2162  N   GLY   135     150.602 129.630 239.878  1.00  0.00           N
ATOM   2163  H   GLY   135     150.298 129.074 240.663  1.00  0.00           H
ATOM   2164  CA  GLY   135     151.804 130.458 240.061  1.00  0.00           C
ATOM   2165  HA2 GLY   135     152.264 130.201 241.015  1.00  0.00           H
ATOM   2166  HA3 GLY   135     152.513 130.203 239.273  1.00  0.00           H
ATOM   2167  C   GLY   135     151.616 131.984 240.029  1.00  0.00           C
ATOM   2168  O   GLY   135     152.467 132.697 240.555  1.00  0.00           O
ATOM   2169  N   MET   136     150.517 132.512 239.479  1.00  0.00           N
ATOM   2170  H   MET   136     149.885 131.868 239.020  1.00  0.00           H
ATOM   2171  CA  MET   136     150.289 133.957 239.282  1.00  0.00           C
ATOM   2172  HA  MET   136     151.265 134.373 239.028  1.00  0.00           H
ATOM   2173  CB  MET   136     149.395 134.173 238.046  1.00  0.00           C
ATOM   2174  HB2 MET   136     149.676 133.447 237.280  1.00  0.00           H
ATOM   2175  HB3 MET   136     148.350 134.010 238.309  1.00  0.00           H
ATOM   2176  CG  MET   136     149.586 135.575 237.449  1.00  0.00           C
ATOM   2177  HG2 MET   136     149.112 136.314 238.093  1.00  0.00           H
ATOM   2178  HG3 MET   136     150.653 135.784 237.426  1.00  0.00           H
ATOM   2179  SD  MET   136     148.968 135.804 235.761  1.00  0.00           S
ATOM   2180  CE  MET   136     147.200 135.527 236.032  1.00  0.00           C
ATOM   2181  HE1 MET   136     146.819 136.248 236.754  1.00  0.00           H
ATOM   2182  HE2 MET   136     146.665 135.631 235.088  1.00  0.00           H
ATOM   2183  HE3 MET   136     147.049 134.521 236.417  1.00  0.00           H
ATOM   2184  C   MET   136     149.849 134.733 240.552  1.00  0.00           C
ATOM   2185  O   MET   136     149.067 135.688 240.489  1.00  0.00           O
ATOM   2186  N   GLY   137     150.394 134.339 241.706  1.00  0.00           N
ATOM   2187  H   GLY   137     151.050 133.571 241.647  1.00  0.00           H
ATOM   2188  CA  GLY   137     150.353 135.076 242.970  1.00  0.00           C
ATOM   2189  HA2 GLY   137     151.224 134.784 243.558  1.00  0.00           H
ATOM   2190  HA3 GLY   137     150.445 136.137 242.750  1.00  0.00           H
ATOM   2191  C   GLY   137     149.120 134.898 243.862  1.00  0.00           C
ATOM   2192  O   GLY   137     148.211 134.125 243.577  1.00  0.00           O
ATOM   2193  N   LYS   138     149.115 135.646 244.977  1.00  0.00           N
ATOM   2194  H   LYS   138     149.935 136.217 245.138  1.00  0.00           H
ATOM   2195  CA  LYS   138     148.052 135.657 246.011  1.00  0.00           C
ATOM   2196  HA  LYS   138     147.879 134.631 246.340  1.00  0.00           H
ATOM   2197  CB  LYS   138     148.525 136.519 247.209  1.00  0.00           C
ATOM   2198  HB2 LYS   138     149.501 136.952 246.982  1.00  0.00           H
ATOM   2199  HB3 LYS   138     147.846 137.364 247.348  1.00  0.00           H
ATOM   2200  CG  LYS   138     148.658 135.782 248.555  1.00  0.00           C
ATOM   2201  HG2 LYS   138     149.282 134.897 248.425  1.00  0.00           H
ATOM   2202  HG3 LYS   138     149.170 136.457 249.242  1.00  0.00           H
ATOM   2203  CD  LYS   138     147.314 135.379 249.192  1.00  0.00           C
ATOM   2204  HD2 LYS   138     146.608 136.203 249.067  1.00  0.00           H
ATOM   2205  HD3 LYS   138     146.904 134.506 248.682  1.00  0.00           H
ATOM   2206  CE  LYS   138     147.442 135.110 250.705  1.00  0.00           C
ATOM   2207  HE2 LYS   138     147.853 136.008 251.176  1.00  0.00           H
ATOM   2208  HE3 LYS   138     146.441 134.957 251.119  1.00  0.00           H
ATOM   2209  NZ  LYS   138     148.301 133.941 251.024  1.00  0.00           N
ATOM   2210  HZ1 LYS   138     148.442 133.841 252.034  1.00  0.00           H
ATOM   2211  HZ2 LYS   138     149.224 134.050 250.633  1.00  0.00           H
ATOM   2212  HZ3 LYS   138     147.892 133.079 250.697  1.00  0.00           H
ATOM   2213  C   LYS   138     146.691 136.163 245.494  1.00  0.00           C
ATOM   2214  O   LYS   138     145.661 135.780 246.035  1.00  0.00           O
ATOM   2215  N   ARG   139     146.711 137.032 244.477  1.00  0.00           N
ATOM   2216  H   ARG   139     147.620 137.232 244.097  1.00  0.00           H
ATOM   2217  CA  ARG   139     145.551 137.602 243.765  1.00  0.00           C
ATOM   2218  HA  ARG   139     144.765 137.859 244.481  1.00  0.00           H
ATOM   2219  CB  ARG   139     146.049 138.882 243.058  1.00  0.00           C
ATOM   2220  HB2 ARG   139     146.615 139.484 243.771  1.00  0.00           H
ATOM   2221  HB3 ARG   139     146.761 138.576 242.292  1.00  0.00           H
ATOM   2222  CG  ARG   139     144.994 139.781 242.383  1.00  0.00           C
ATOM   2223  HG2 ARG   139     145.457 140.172 241.477  1.00  0.00           H
ATOM   2224  HG3 ARG   139     144.130 139.193 242.079  1.00  0.00           H
ATOM   2225  CD  ARG   139     144.538 140.983 243.235  1.00  0.00           C
ATOM   2226  HD2 ARG   139     143.578 140.782 243.700  1.00  0.00           H
ATOM   2227  HD3 ARG   139     145.249 141.140 244.046  1.00  0.00           H
ATOM   2228  NE  ARG   139     144.496 142.225 242.437  1.00  0.00           N
ATOM   2229  HE  ARG   139     145.409 142.605 242.218  1.00  0.00           H
ATOM   2230  CZ  ARG   139     143.451 142.929 242.035  1.00  0.00           C
ATOM   2231  NH1 ARG   139     142.213 142.608 242.253  1.00  0.00           N
ATOM   2232 HH11 ARG   139     141.963 141.752 242.767  1.00  0.00           H
ATOM   2233 HH12 ARG   139     141.481 143.210 241.923  1.00  0.00           H
ATOM   2234  NH2 ARG   139     143.638 144.028 241.364  1.00  0.00           N
ATOM   2235 HH21 ARG   139     144.559 144.351 241.148  1.00  0.00           H
ATOM   2236 HH22 ARG   139     142.818 144.603 241.140  1.00  0.00           H
ATOM   2237  C   ARG   139     144.991 136.567 242.775  1.00  0.00           C
ATOM   2238  O   ARG   139     145.771 135.971 242.028  1.00  0.00           O
ATOM   2239  N   SER   140     143.674 136.363 242.707  1.00  0.00           N
ATOM   2240  H   SER   140     143.080 136.965 243.276  1.00  0.00           H
ATOM   2241  CA  SER   140     143.049 135.385 241.783  1.00  0.00           C
ATOM   2242  HA  SER   140     143.809 134.642 241.553  1.00  0.00           H
ATOM   2243  CB  SER   140     141.927 134.591 242.482  1.00  0.00           C
ATOM   2244  HB2 SER   140     142.031 133.539 242.213  1.00  0.00           H
ATOM   2245  HB3 SER   140     142.049 134.668 243.564  1.00  0.00           H
ATOM   2246  OG  SER   140     140.621 135.001 242.124  1.00  0.00           O
ATOM   2247  HG  SER   140     140.000 134.575 242.728  1.00  0.00           H
ATOM   2248  C   SER   140     142.638 135.988 240.424  1.00  0.00           C
ATOM   2249  O   SER   140     142.746 137.201 240.219  1.00  0.00           O
ATOM   2250  N   ILE   141     142.234 135.172 239.443  1.00  0.00           N
ATOM   2251  H   ILE   141     142.274 134.170 239.607  1.00  0.00           H
ATOM   2252  CA  ILE   141     141.660 135.679 238.180  1.00  0.00           C
ATOM   2253  HA  ILE   141     142.276 136.509 237.835  1.00  0.00           H
ATOM   2254  CB  ILE   141     141.674 134.610 237.056  1.00  0.00           C
ATOM   2255  HB  ILE   141     141.432 133.632 237.475  1.00  0.00           H
ATOM   2256  CG2 ILE   141     140.638 134.911 235.959  1.00  0.00           C
ATOM   2257 HG21 ILE   141     139.628 134.822 236.355  1.00  0.00           H
ATOM   2258 HG22 ILE   141     140.727 134.197 235.138  1.00  0.00           H
ATOM   2259 HG23 ILE   141     140.780 135.922 235.583  1.00  0.00           H
ATOM   2260  CG1 ILE   141     143.053 134.548 236.357  1.00  0.00           C
ATOM   2261 HG12 ILE   141     142.948 134.021 235.409  1.00  0.00           H
ATOM   2262 HG13 ILE   141     143.405 135.555 236.129  1.00  0.00           H
ATOM   2263  CD1 ILE   141     144.121 133.804 237.155  1.00  0.00           C
ATOM   2264 HD11 ILE   141     144.403 134.368 238.043  1.00  0.00           H
ATOM   2265 HD12 ILE   141     144.999 133.664 236.528  1.00  0.00           H
ATOM   2266 HD13 ILE   141     143.738 132.826 237.434  1.00  0.00           H
ATOM   2267  C   ILE   141     140.270 136.289 238.421  1.00  0.00           C
ATOM   2268  O   ILE   141     140.074 137.447 238.055  1.00  0.00           O
ATOM   2269  N   GLU   142     139.354 135.560 239.075  1.00  0.00           N
ATOM   2270  H   GLU   142     139.610 134.631 239.365  1.00  0.00           H
ATOM   2271  CA  GLU   142     138.003 136.039 239.443  1.00  0.00           C
ATOM   2272  HA  GLU   142     137.413 136.220 238.543  1.00  0.00           H
ATOM   2273  CB  GLU   142     137.291 134.951 240.279  1.00  0.00           C
ATOM   2274  HB2 GLU   142     137.191 134.046 239.681  1.00  0.00           H
ATOM   2275  HB3 GLU   142     137.944 134.701 241.117  1.00  0.00           H
ATOM   2276  CG  GLU   142     135.914 135.321 240.878  1.00  0.00           C
ATOM   2277  HG2 GLU   142     135.694 134.583 241.653  1.00  0.00           H
ATOM   2278  HG3 GLU   142     135.972 136.290 241.376  1.00  0.00           H
ATOM   2279  CD  GLU   142     134.741 135.322 239.881  1.00  0.00           C
ATOM   2280  OE1 GLU   142     134.996 135.267 238.658  1.00  0.00           O
ATOM   2281  OE2 GLU   142     133.576 135.353 240.350  1.00  0.00           O
ATOM   2282  C   GLU   142     138.096 137.356 240.226  1.00  0.00           C
ATOM   2283  O   GLU   142     137.437 138.332 239.893  1.00  0.00           O
ATOM   2284  N   ASP   143     139.003 137.411 241.201  1.00  0.00           N
ATOM   2285  H   ASP   143     139.533 136.567 241.377  1.00  0.00           H
ATOM   2286  CA  ASP   143     139.375 138.592 241.986  1.00  0.00           C
ATOM   2287  HA  ASP   143     138.537 138.896 242.615  1.00  0.00           H
ATOM   2288  CB  ASP   143     140.523 138.113 242.892  1.00  0.00           C
ATOM   2289  HB2 ASP   143     140.102 137.484 243.679  1.00  0.00           H
ATOM   2290  HB3 ASP   143     141.168 137.486 242.285  1.00  0.00           H
ATOM   2291  CG  ASP   143     141.461 139.130 243.529  1.00  0.00           C
ATOM   2292  OD1 ASP   143     141.232 140.356 243.449  1.00  0.00           O
ATOM   2293  OD2 ASP   143     142.496 138.645 244.038  1.00  0.00           O
ATOM   2294  C   ASP   143     139.731 139.792 241.088  1.00  0.00           C
ATOM   2295  O   ASP   143     139.096 140.844 241.191  1.00  0.00           O
ATOM   2296  N   ARG   144     140.664 139.632 240.136  1.00  0.00           N
ATOM   2297  H   ARG   144     141.094 138.718 240.047  1.00  0.00           H
ATOM   2298  CA  ARG   144     141.057 140.713 239.213  1.00  0.00           C
ATOM   2299  HA  ARG   144     141.380 141.569 239.805  1.00  0.00           H
ATOM   2300  CB  ARG   144     142.217 140.267 238.308  1.00  0.00           C
ATOM   2301  HB2 ARG   144     141.967 139.304 237.861  1.00  0.00           H
ATOM   2302  HB3 ARG   144     142.334 140.992 237.500  1.00  0.00           H
ATOM   2303  CG  ARG   144     143.559 140.162 239.051  1.00  0.00           C
ATOM   2304  HG2 ARG   144     143.897 141.156 239.344  1.00  0.00           H
ATOM   2305  HG3 ARG   144     143.436 139.559 239.945  1.00  0.00           H
ATOM   2306  CD  ARG   144     144.594 139.509 238.126  1.00  0.00           C
ATOM   2307  HD2 ARG   144     144.193 138.560 237.764  1.00  0.00           H
ATOM   2308  HD3 ARG   144     144.730 140.160 237.261  1.00  0.00           H
ATOM   2309  NE  ARG   144     145.914 139.284 238.758  1.00  0.00           N
ATOM   2310  HE  ARG   144     146.618 139.996 238.593  1.00  0.00           H
ATOM   2311  CZ  ARG   144     146.327 138.173 239.346  1.00  0.00           C
ATOM   2312  NH1 ARG   144     145.517 137.191 239.588  1.00  0.00           N
ATOM   2313 HH11 ARG   144     144.521 137.354 239.502  1.00  0.00           H
ATOM   2314 HH12 ARG   144     145.826 136.468 240.230  1.00  0.00           H
ATOM   2315  NH2 ARG   144     147.560 138.006 239.724  1.00  0.00           N
ATOM   2316 HH21 ARG   144     148.262 138.734 239.659  1.00  0.00           H
ATOM   2317 HH22 ARG   144     147.863 137.118 240.119  1.00  0.00           H
ATOM   2318  C   ARG   144     139.880 141.225 238.375  1.00  0.00           C
ATOM   2319  O   ARG   144     139.703 142.440 238.294  1.00  0.00           O
ATOM   2320  N   VAL   145     139.076 140.350 237.760  1.00  0.00           N
ATOM   2321  H   VAL   145     139.239 139.357 237.903  1.00  0.00           H
ATOM   2322  CA  VAL   145     137.942 140.794 236.917  1.00  0.00           C
ATOM   2323  HA  VAL   145     138.287 141.631 236.310  1.00  0.00           H
ATOM   2324  CB  VAL   145     137.443 139.719 235.932  1.00  0.00           C
ATOM   2325  HB  VAL   145     136.544 140.102 235.447  1.00  0.00           H
ATOM   2326  CG1 VAL   145     138.484 139.487 234.839  1.00  0.00           C
ATOM   2327 HG11 VAL   145     139.426 139.158 235.278  1.00  0.00           H
ATOM   2328 HG12 VAL   145     138.126 138.727 234.146  1.00  0.00           H
ATOM   2329 HG13 VAL   145     138.635 140.411 234.286  1.00  0.00           H
ATOM   2330  CG2 VAL   145     137.091 138.369 236.553  1.00  0.00           C
ATOM   2331 HG21 VAL   145     137.980 137.880 236.932  1.00  0.00           H
ATOM   2332 HG22 VAL   145     136.654 137.728 235.792  1.00  0.00           H
ATOM   2333 HG23 VAL   145     136.378 138.485 237.366  1.00  0.00           H
ATOM   2334  C   VAL   145     136.773 141.344 237.733  1.00  0.00           C
ATOM   2335  O   VAL   145     136.198 142.359 237.347  1.00  0.00           O
ATOM   2336  N   GLN   146     136.445 140.740 238.875  1.00  0.00           N
ATOM   2337  H   GLN   146     136.958 139.903 239.144  1.00  0.00           H
ATOM   2338  CA  GLN   146     135.378 141.186 239.772  1.00  0.00           C
ATOM   2339  HA  GLN   146     134.469 141.328 239.187  1.00  0.00           H
ATOM   2340  CB  GLN   146     135.129 140.071 240.806  1.00  0.00           C
ATOM   2341  HB2 GLN   146     135.048 139.114 240.290  1.00  0.00           H
ATOM   2342  HB3 GLN   146     136.003 140.018 241.456  1.00  0.00           H
ATOM   2343  CG  GLN   146     133.857 140.224 241.657  1.00  0.00           C
ATOM   2344  HG2 GLN   146     133.522 141.259 241.663  1.00  0.00           H
ATOM   2345  HG3 GLN   146     133.063 139.628 241.208  1.00  0.00           H
ATOM   2346  CD  GLN   146     134.073 139.780 243.103  1.00  0.00           C
ATOM   2347  OE1 GLN   146     134.959 140.253 243.806  1.00  0.00           O
ATOM   2348  NE2 GLN   146     133.218 138.953 243.655  1.00  0.00           N
ATOM   2349 HE21 GLN   146     133.452 138.566 244.551  1.00  0.00           H
ATOM   2350 HE22 GLN   146     132.418 138.624 243.118  1.00  0.00           H
ATOM   2351  C   GLN   146     135.736 142.527 240.433  1.00  0.00           C
ATOM   2352  O   GLN   146     134.870 143.386 240.610  1.00  0.00           O
ATOM   2353  N   GLU   147     137.002 142.752 240.796  1.00  0.00           N
ATOM   2354  H   GLU   147     137.676 141.991 240.707  1.00  0.00           H
ATOM   2355  CA  GLU   147     137.500 144.040 241.295  1.00  0.00           C
ATOM   2356  HA  GLU   147     136.867 144.366 242.117  1.00  0.00           H
ATOM   2357  CB  GLU   147     138.911 143.849 241.876  1.00  0.00           C
ATOM   2358  HB2 GLU   147     138.848 143.072 242.638  1.00  0.00           H
ATOM   2359  HB3 GLU   147     139.592 143.505 241.097  1.00  0.00           H
ATOM   2360  CG  GLU   147     139.477 145.102 242.556  1.00  0.00           C
ATOM   2361  HG2 GLU   147     138.666 145.674 243.013  1.00  0.00           H
ATOM   2362  HG3 GLU   147     140.143 144.779 243.360  1.00  0.00           H
ATOM   2363  CD  GLU   147     140.288 145.972 241.596  1.00  0.00           C
ATOM   2364  OE1 GLU   147     141.338 145.499 241.102  1.00  0.00           O
ATOM   2365  OE2 GLU   147     139.884 147.132 241.357  1.00  0.00           O
ATOM   2366  C   GLU   147     137.418 145.130 240.215  1.00  0.00           C
ATOM   2367  O   GLU   147     136.800 146.174 240.444  1.00  0.00           O
ATOM   2368  N   GLH   148     137.912 144.855 238.999  1.00  0.00           N
ATOM   2369  H   GLH   148     138.410 143.981 238.854  1.00  0.00           H
ATOM   2370  CA  GLH   148     137.780 145.791 237.877  1.00  0.00           C
ATOM   2371  HA  GLH   148     138.221 146.731 238.208  1.00  0.00           H
ATOM   2372  CB  GLH   148     138.572 145.290 236.650  1.00  0.00           C
ATOM   2373  HB2 GLH   148     139.145 144.409 236.925  1.00  0.00           H
ATOM   2374  HB3 GLH   148     137.892 144.988 235.851  1.00  0.00           H
ATOM   2375  CG  GLH   148     139.585 146.331 236.132  1.00  0.00           C
ATOM   2376  HG2 GLH   148     140.211 146.663 236.961  1.00  0.00           H
ATOM   2377  HG3 GLH   148     140.234 145.844 235.407  1.00  0.00           H
ATOM   2378  CD  GLH   148     138.987 147.560 235.447  1.00  0.00           C
ATOM   2379  OE1 GLH   148     139.555 148.640 235.353  1.00  0.00           O
ATOM   2380  OE2 GLH   148     137.745 147.431 234.947  1.00  0.00           O
ATOM   2381  HE2 GLH   148     137.509 148.308 234.615  1.00  0.00           H
ATOM   2382  C   GLH   148     136.301 146.074 237.543  1.00  0.00           C
ATOM   2383  O   GLH   148     135.941 147.232 237.333  1.00  0.00           O
ATOM   2384  N   ALA   149     135.414 145.075 237.609  1.00  0.00           N
ATOM   2385  H   ALA   149     135.757 144.130 237.753  1.00  0.00           H
ATOM   2386  CA  ALA   149     133.973 145.253 237.408  1.00  0.00           C
ATOM   2387  HA  ALA   149     133.818 145.624 236.395  1.00  0.00           H
ATOM   2388  CB  ALA   149     133.276 143.891 237.521  1.00  0.00           C
ATOM   2389  HB1 ALA   149     132.224 144.004 237.259  1.00  0.00           H
ATOM   2390  HB2 ALA   149     133.343 143.511 238.538  1.00  0.00           H
ATOM   2391  HB3 ALA   149     133.733 143.175 236.837  1.00  0.00           H
ATOM   2392  C   ALA   149     133.350 146.282 238.374  1.00  0.00           C
ATOM   2393  O   ALA   149     132.486 147.056 237.953  1.00  0.00           O
ATOM   2394  N   ARG   150     133.836 146.380 239.628  1.00  0.00           N
ATOM   2395  H   ARG   150     134.583 145.750 239.901  1.00  0.00           H
ATOM   2396  CA  ARG   150     133.400 147.441 240.560  1.00  0.00           C
ATOM   2397  HA  ARG   150     132.312 147.413 240.628  1.00  0.00           H
ATOM   2398  CB  ARG   150     133.989 147.307 241.981  1.00  0.00           C
ATOM   2399  HB2 ARG   150     135.012 147.687 241.978  1.00  0.00           H
ATOM   2400  HB3 ARG   150     133.413 147.965 242.634  1.00  0.00           H
ATOM   2401  CG  ARG   150     134.045 145.926 242.640  1.00  0.00           C
ATOM   2402  HG2 ARG   150     134.861 145.379 242.181  1.00  0.00           H
ATOM   2403  HG3 ARG   150     134.303 146.079 243.690  1.00  0.00           H
ATOM   2404  CD  ARG   150     132.764 145.079 242.562  1.00  0.00           C
ATOM   2405  HD2 ARG   150     131.905 145.741 242.683  1.00  0.00           H
ATOM   2406  HD3 ARG   150     132.693 144.618 241.574  1.00  0.00           H
ATOM   2407  NE  ARG   150     132.697 144.034 243.614  1.00  0.00           N
ATOM   2408  HE  ARG   150     131.830 143.967 244.121  1.00  0.00           H
ATOM   2409  CZ  ARG   150     133.622 143.155 243.970  1.00  0.00           C
ATOM   2410  NH1 ARG   150     134.768 143.031 243.378  1.00  0.00           N
ATOM   2411 HH11 ARG   150     134.875 143.479 242.476  1.00  0.00           H
ATOM   2412 HH12 ARG   150     135.338 142.225 243.604  1.00  0.00           H
ATOM   2413  NH2 ARG   150     133.407 142.313 244.930  1.00  0.00           N
ATOM   2414 HH21 ARG   150     132.457 142.164 245.242  1.00  0.00           H
ATOM   2415 HH22 ARG   150     134.074 141.559 245.036  1.00  0.00           H
ATOM   2416  C   ARG   150     133.767 148.824 240.020  1.00  0.00           C
ATOM   2417  O   ARG   150     132.922 149.709 239.962  1.00  0.00           O
ATOM   2418  N   CYS   151     135.022 149.025 239.615  1.00  0.00           N
ATOM   2419  H   CYS   151     135.669 148.248 239.653  1.00  0.00           H
ATOM   2420  CA  CYS   151     135.484 150.339 239.156  1.00  0.00           C
ATOM   2421  HA  CYS   151     135.064 151.079 239.835  1.00  0.00           H
ATOM   2422  CB  CYS   151     137.005 150.428 239.304  1.00  0.00           C
ATOM   2423  HB2 CYS   151     137.308 151.477 239.275  1.00  0.00           H
ATOM   2424  HB3 CYS   151     137.291 150.003 240.266  1.00  0.00           H
ATOM   2425  SG  CYS   151     137.859 149.556 237.970  1.00  0.00           S
ATOM   2426  HG  CYS   151     137.252 148.369 238.121  1.00  0.00           H
ATOM   2427  C   CYS   151     134.980 150.714 237.750  1.00  0.00           C
ATOM   2428  O   CYS   151     134.912 151.901 237.438  1.00  0.00           O
ATOM   2429  N   LEU   152     134.588 149.728 236.932  1.00  0.00           N
ATOM   2430  H   LEU   152     134.767 148.773 237.228  1.00  0.00           H
ATOM   2431  CA  LEU   152     133.848 149.914 235.681  1.00  0.00           C
ATOM   2432  HA  LEU   152     134.397 150.606 235.040  1.00  0.00           H
ATOM   2433  CB  LEU   152     133.741 148.554 234.959  1.00  0.00           C
ATOM   2434  HB2 LEU   152     134.730 148.270 234.596  1.00  0.00           H
ATOM   2435  HB3 LEU   152     133.431 147.804 235.683  1.00  0.00           H
ATOM   2436  CG  LEU   152     132.737 148.502 233.790  1.00  0.00           C
ATOM   2437  HG  LEU   152     131.739 148.747 234.151  1.00  0.00           H
ATOM   2438  CD1 LEU   152     133.098 149.463 232.664  1.00  0.00           C
ATOM   2439 HD11 LEU   152     133.062 150.485 233.035  1.00  0.00           H
ATOM   2440 HD12 LEU   152     132.372 149.368 231.856  1.00  0.00           H
ATOM   2441 HD13 LEU   152     134.094 149.241 232.284  1.00  0.00           H
ATOM   2442  CD2 LEU   152     132.684 147.090 233.218  1.00  0.00           C
ATOM   2443 HD21 LEU   152     133.669 146.784 232.862  1.00  0.00           H
ATOM   2444 HD22 LEU   152     132.350 146.404 233.994  1.00  0.00           H
ATOM   2445 HD23 LEU   152     131.975 147.049 232.391  1.00  0.00           H
ATOM   2446  C   LEU   152     132.477 150.547 235.945  1.00  0.00           C
ATOM   2447  O   LEU   152     132.191 151.611 235.403  1.00  0.00           O
ATOM   2448  N   VAL   153     131.646 149.947 236.807  1.00  0.00           N
ATOM   2449  H   VAL   153     131.919 149.070 237.240  1.00  0.00           H
ATOM   2450  CA  VAL   153     130.357 150.565 237.169  1.00  0.00           C
ATOM   2451  HA  VAL   153     129.869 150.851 236.237  1.00  0.00           H
ATOM   2452  CB  VAL   153     129.417 149.557 237.859  1.00  0.00           C
ATOM   2453  HB  VAL   153     129.355 148.669 237.228  1.00  0.00           H
ATOM   2454  CG1 VAL   153     129.856 149.115 239.257  1.00  0.00           C
ATOM   2455 HG11 VAL   153     130.791 148.568 239.184  1.00  0.00           H
ATOM   2456 HG12 VAL   153     129.984 149.975 239.915  1.00  0.00           H
ATOM   2457 HG13 VAL   153     129.107 148.448 239.685  1.00  0.00           H
ATOM   2458  CG2 VAL   153     128.007 150.130 237.977  1.00  0.00           C
ATOM   2459 HG21 VAL   153     127.343 149.344 238.322  1.00  0.00           H
ATOM   2460 HG22 VAL   153     127.662 150.480 237.004  1.00  0.00           H
ATOM   2461 HG23 VAL   153     127.987 150.949 238.695  1.00  0.00           H
ATOM   2462  C   VAL   153     130.552 151.872 237.954  1.00  0.00           C
ATOM   2463  O   VAL   153     129.747 152.795 237.834  1.00  0.00           O
ATOM   2464  N   GLU   154     131.668 152.019 238.673  1.00  0.00           N
ATOM   2465  H   GLU   154     132.248 151.204 238.840  1.00  0.00           H
ATOM   2466  CA  GLU   154     132.027 153.284 239.313  1.00  0.00           C
ATOM   2467  HA  GLU   154     131.162 153.589 239.903  1.00  0.00           H
ATOM   2468  CB  GLU   154     133.222 153.102 240.268  1.00  0.00           C
ATOM   2469  HB2 GLU   154     133.133 152.145 240.780  1.00  0.00           H
ATOM   2470  HB3 GLU   154     134.145 153.094 239.689  1.00  0.00           H
ATOM   2471  CG  GLU   154     133.334 154.198 241.341  1.00  0.00           C
ATOM   2472  HG2 GLU   154     134.185 153.967 241.985  1.00  0.00           H
ATOM   2473  HG3 GLU   154     133.540 155.153 240.858  1.00  0.00           H
ATOM   2474  CD  GLU   154     132.064 154.306 242.196  1.00  0.00           C
ATOM   2475  OE1 GLU   154     131.469 153.258 242.529  1.00  0.00           O
ATOM   2476  OE2 GLU   154     131.608 155.434 242.470  1.00  0.00           O
ATOM   2477  C   GLU   154     132.295 154.418 238.309  1.00  0.00           C
ATOM   2478  O   GLU   154     132.025 155.563 238.644  1.00  0.00           O
ATOM   2479  N   GLU   155     132.749 154.175 237.071  1.00  0.00           N
ATOM   2480  H   GLU   155     132.945 153.218 236.790  1.00  0.00           H
ATOM   2481  CA  GLU   155     132.854 155.250 236.061  1.00  0.00           C
ATOM   2482  HA  GLU   155     133.466 156.051 236.469  1.00  0.00           H
ATOM   2483  CB  GLU   155     133.517 154.761 234.762  1.00  0.00           C
ATOM   2484  HB2 GLU   155     133.095 153.802 234.470  1.00  0.00           H
ATOM   2485  HB3 GLU   155     133.295 155.469 233.963  1.00  0.00           H
ATOM   2486  CG  GLU   155     135.042 154.637 234.875  1.00  0.00           C
ATOM   2487  HG2 GLU   155     135.282 153.947 235.685  1.00  0.00           H
ATOM   2488  HG3 GLU   155     135.429 154.214 233.948  1.00  0.00           H
ATOM   2489  CD  GLU   155     135.740 155.981 235.126  1.00  0.00           C
ATOM   2490  OE1 GLU   155     135.333 157.040 234.602  1.00  0.00           O
ATOM   2491  OE2 GLU   155     136.731 156.018 235.891  1.00  0.00           O
ATOM   2492  C   GLU   155     131.496 155.893 235.745  1.00  0.00           C
ATOM   2493  O   GLU   155     131.418 157.110 235.571  1.00  0.00           O
ATOM   2494  N   LEU   156     130.407 155.122 235.760  1.00  0.00           N
ATOM   2495  H   LEU   156     130.526 154.132 235.944  1.00  0.00           H
ATOM   2496  CA  LEU   156     129.044 155.631 235.562  1.00  0.00           C
ATOM   2497  HA  LEU   156     129.026 156.285 234.691  1.00  0.00           H
ATOM   2498  CB  LEU   156     128.099 154.452 235.274  1.00  0.00           C
ATOM   2499  HB2 LEU   156     128.257 153.671 236.015  1.00  0.00           H
ATOM   2500  HB3 LEU   156     127.075 154.812 235.389  1.00  0.00           H
ATOM   2501  CG  LEU   156     128.214 153.839 233.864  1.00  0.00           C
ATOM   2502  HG  LEU   156     127.974 154.604 233.128  1.00  0.00           H
ATOM   2503  CD1 LEU   156     129.579 153.240 233.508  1.00  0.00           C
ATOM   2504 HD11 LEU   156     130.316 154.032 233.391  1.00  0.00           H
ATOM   2505 HD12 LEU   156     129.515 152.710 232.558  1.00  0.00           H
ATOM   2506 HD13 LEU   156     129.902 152.545 234.283  1.00  0.00           H
ATOM   2507  CD2 LEU   156     127.196 152.708 233.752  1.00  0.00           C
ATOM   2508 HD21 LEU   156     127.454 151.903 234.440  1.00  0.00           H
ATOM   2509 HD22 LEU   156     126.200 153.081 233.988  1.00  0.00           H
ATOM   2510 HD23 LEU   156     127.190 152.332 232.730  1.00  0.00           H
ATOM   2511  C   LEU   156     128.568 156.470 236.767  1.00  0.00           C
ATOM   2512  O   LEU   156     127.769 157.394 236.613  1.00  0.00           O
ATOM   2513  N   ARG   157     129.103 156.211 237.968  1.00  0.00           N
ATOM   2514  H   ARG   157     129.743 155.425 238.024  1.00  0.00           H
ATOM   2515  CA  ARG   157     128.885 157.027 239.179  1.00  0.00           C
ATOM   2516  HA  ARG   157     127.876 157.441 239.135  1.00  0.00           H
ATOM   2517  CB  ARG   157     128.948 156.097 240.399  1.00  0.00           C
ATOM   2518  HB2 ARG   157     128.165 155.346 240.283  1.00  0.00           H
ATOM   2519  HB3 ARG   157     129.908 155.580 240.413  1.00  0.00           H
ATOM   2520  CG  ARG   157     128.752 156.813 241.749  1.00  0.00           C
ATOM   2521  HG2 ARG   157     129.705 157.243 242.059  1.00  0.00           H
ATOM   2522  HG3 ARG   157     128.037 157.627 241.631  1.00  0.00           H
ATOM   2523  CD  ARG   157     128.228 155.887 242.862  1.00  0.00           C
ATOM   2524  HD2 ARG   157     128.432 156.353 243.828  1.00  0.00           H
ATOM   2525  HD3 ARG   157     127.147 155.805 242.752  1.00  0.00           H
ATOM   2526  NE  ARG   157     128.851 154.550 242.831  1.00  0.00           N
ATOM   2527  HE  ARG   157     129.877 154.527 242.845  1.00  0.00           H
ATOM   2528  CZ  ARG   157     128.252 153.388 242.633  1.00  0.00           C
ATOM   2529  NH1 ARG   157     126.959 153.250 242.576  1.00  0.00           N
ATOM   2530 HH11 ARG   157     126.363 154.028 242.757  1.00  0.00           H
ATOM   2531 HH12 ARG   157     126.587 152.322 242.391  1.00  0.00           H
ATOM   2532  NH2 ARG   157     128.943 152.309 242.459  1.00  0.00           N
ATOM   2533 HH21 ARG   157     129.964 152.408 242.490  1.00  0.00           H
ATOM   2534 HH22 ARG   157     128.477 151.437 242.275  1.00  0.00           H
ATOM   2535  C   ARG   157     129.828 158.237 239.271  1.00  0.00           C
ATOM   2536  O   ARG   157     129.392 159.303 239.707  1.00  0.00           O
ATOM   2537  N   LYS   158     131.066 158.145 238.772  1.00  0.00           N
ATOM   2538  H   LYS   158     131.378 157.217 238.500  1.00  0.00           H
ATOM   2539  CA  LYS   158     131.986 159.284 238.576  1.00  0.00           C
ATOM   2540  HA  LYS   158     132.102 159.816 239.522  1.00  0.00           H
ATOM   2541  CB  LYS   158     133.379 158.796 238.118  1.00  0.00           C
ATOM   2542  HB2 LYS   158     133.247 158.190 237.222  1.00  0.00           H
ATOM   2543  HB3 LYS   158     133.980 159.664 237.840  1.00  0.00           H
ATOM   2544  CG  LYS   158     134.172 157.985 239.171  1.00  0.00           C
ATOM   2545  HG2 LYS   158     134.472 158.643 239.988  1.00  0.00           H
ATOM   2546  HG3 LYS   158     133.534 157.215 239.593  1.00  0.00           H
ATOM   2547  CD  LYS   158     135.427 157.329 238.555  1.00  0.00           C
ATOM   2548  HD2 LYS   158     135.216 157.129 237.509  1.00  0.00           H
ATOM   2549  HD3 LYS   158     136.263 158.026 238.604  1.00  0.00           H
ATOM   2550  CE  LYS   158     135.816 155.994 239.218  1.00  0.00           C
ATOM   2551  HE2 LYS   158     136.108 156.169 240.257  1.00  0.00           H
ATOM   2552  HE3 LYS   158     134.923 155.362 239.222  1.00  0.00           H
ATOM   2553  NZ  LYS   158     136.900 155.284 238.480  1.00  0.00           N
ATOM   2554  HZ1 LYS   158     137.836 155.678 238.594  1.00  0.00           H
ATOM   2555  HZ2 LYS   158     136.745 155.330 237.472  1.00  0.00           H
ATOM   2556  HZ3 LYS   158     136.985 154.311 238.734  1.00  0.00           H
ATOM   2557  C   LYS   158     131.389 160.281 237.572  1.00  0.00           C
ATOM   2558  O   LYS   158     131.241 161.451 237.911  1.00  0.00           O
ATOM   2559  N   THR   159     130.971 159.809 236.394  1.00  0.00           N
ATOM   2560  H   THR   159     131.140 158.826 236.202  1.00  0.00           H
ATOM   2561  CA  THR   159     130.289 160.596 235.337  1.00  0.00           C
ATOM   2562  HA  THR   159     130.805 161.551 235.229  1.00  0.00           H
ATOM   2563  CB  THR   159     130.341 159.887 233.974  1.00  0.00           C
ATOM   2564  HB  THR   159     129.775 160.476 233.251  1.00  0.00           H
ATOM   2565  CG2 THR   159     131.761 159.717 233.435  1.00  0.00           C
ATOM   2566 HG21 THR   159     132.372 159.125 234.117  1.00  0.00           H
ATOM   2567 HG22 THR   159     132.218 160.696 233.299  1.00  0.00           H
ATOM   2568 HG23 THR   159     131.718 159.213 232.469  1.00  0.00           H
ATOM   2569  OG1 THR   159     129.754 158.615 234.067  1.00  0.00           O
ATOM   2570  HG1 THR   159     130.408 158.014 234.465  1.00  0.00           H
ATOM   2571  C   THR   159     128.823 160.936 235.642  1.00  0.00           C
ATOM   2572  O   THR   159     128.270 161.824 234.998  1.00  0.00           O
ATOM   2573  N   LYS   160     128.212 160.282 236.643  1.00  0.00           N
ATOM   2574  H   LYS   160     128.674 159.446 236.970  1.00  0.00           H
ATOM   2575  CA  LYS   160     126.943 160.641 237.309  1.00  0.00           C
ATOM   2576  HA  LYS   160     126.567 159.724 237.763  1.00  0.00           H
ATOM   2577  CB  LYS   160     127.176 161.619 238.482  1.00  0.00           C
ATOM   2578  HB2 LYS   160     126.206 161.891 238.903  1.00  0.00           H
ATOM   2579  HB3 LYS   160     127.701 161.071 239.255  1.00  0.00           H
ATOM   2580  CG  LYS   160     127.948 162.916 238.165  1.00  0.00           C
ATOM   2581  HG2 LYS   160     128.850 162.704 237.595  1.00  0.00           H
ATOM   2582  HG3 LYS   160     127.311 163.556 237.554  1.00  0.00           H
ATOM   2583  CD  LYS   160     128.359 163.702 239.422  1.00  0.00           C
ATOM   2584  HD2 LYS   160     128.451 164.750 239.132  1.00  0.00           H
ATOM   2585  HD3 LYS   160     127.576 163.641 240.180  1.00  0.00           H
ATOM   2586  CE  LYS   160     129.718 163.275 240.007  1.00  0.00           C
ATOM   2587  HE2 LYS   160     130.464 163.293 239.206  1.00  0.00           H
ATOM   2588  HE3 LYS   160     130.015 164.016 240.755  1.00  0.00           H
ATOM   2589  NZ  LYS   160     129.698 161.932 240.635  1.00  0.00           N
ATOM   2590  HZ1 LYS   160     128.986 161.856 241.344  1.00  0.00           H
ATOM   2591  HZ2 LYS   160     130.584 161.717 241.092  1.00  0.00           H
ATOM   2592  HZ3 LYS   160     129.556 161.192 239.952  1.00  0.00           H
ATOM   2593  C   LYS   160     125.825 161.070 236.351  1.00  0.00           C
ATOM   2594  O   LYS   160     125.467 162.240 236.268  1.00  0.00           O
ATOM   2595  N   ALA   161     125.263 160.083 235.654  1.00  0.00           N
ATOM   2596  H   ALA   161     125.659 159.162 235.771  1.00  0.00           H
ATOM   2597  CA  ALA   161     124.130 160.215 234.728  1.00  0.00           C
ATOM   2598  HA  ALA   161     123.910 159.208 234.373  1.00  0.00           H
ATOM   2599  CB  ALA   161     122.880 160.676 235.497  1.00  0.00           C
ATOM   2600  HB1 ALA   161     122.734 160.058 236.384  1.00  0.00           H
ATOM   2601  HB2 ALA   161     122.001 160.581 234.857  1.00  0.00           H
ATOM   2602  HB3 ALA   161     122.977 161.720 235.795  1.00  0.00           H
ATOM   2603  C   ALA   161     124.377 161.046 233.448  1.00  0.00           C
ATOM   2604  O   ALA   161     123.489 161.101 232.599  1.00  0.00           O
ATOM   2605  N   SER   162     125.562 161.639 233.248  1.00  0.00           N
ATOM   2606  H   SER   162     126.255 161.617 233.986  1.00  0.00           H
ATOM   2607  CA  SER   162     125.894 162.342 232.001  1.00  0.00           C
ATOM   2608  HA  SER   162     125.205 163.177 231.895  1.00  0.00           H
ATOM   2609  CB  SER   162     127.307 162.927 232.077  1.00  0.00           C
ATOM   2610  HB2 SER   162     127.360 163.626 232.914  1.00  0.00           H
ATOM   2611  HB3 SER   162     128.029 162.126 232.241  1.00  0.00           H
ATOM   2612  OG  SER   162     127.624 163.612 230.877  1.00  0.00           O
ATOM   2613  HG  SER   162     127.817 162.967 230.186  1.00  0.00           H
ATOM   2614  C   SER   162     125.794 161.409 230.780  1.00  0.00           C
ATOM   2615  O   SER   162     126.437 160.356 230.785  1.00  0.00           O
ATOM   2616  N   PRO   163     125.068 161.781 229.704  1.00  0.00           N
ATOM   2617  CD  PRO   163     124.110 162.874 229.632  1.00  0.00           C
ATOM   2618  HD2 PRO   163     124.635 163.804 229.408  1.00  0.00           H
ATOM   2619  HD3 PRO   163     123.536 162.970 230.554  1.00  0.00           H
ATOM   2620  CG  PRO   163     123.171 162.511 228.483  1.00  0.00           C
ATOM   2621  HG2 PRO   163     122.732 163.397 228.023  1.00  0.00           H
ATOM   2622  HG3 PRO   163     122.393 161.839 228.847  1.00  0.00           H
ATOM   2623  CB  PRO   163     124.094 161.766 227.521  1.00  0.00           C
ATOM   2624  HB2 PRO   163     124.645 162.493 226.922  1.00  0.00           H
ATOM   2625  HB3 PRO   163     123.542 161.083 226.876  1.00  0.00           H
ATOM   2626  CA  PRO   163     125.044 161.013 228.461  1.00  0.00           C
ATOM   2627  HA  PRO   163     124.622 160.037 228.680  1.00  0.00           H
ATOM   2628  C   PRO   163     126.446 160.845 227.863  1.00  0.00           C
ATOM   2629  O   PRO   163     127.122 161.839 227.585  1.00  0.00           O
ATOM   2630  N   CYS   164     126.884 159.602 227.659  1.00  0.00           N
ATOM   2631  H   CYS   164     126.289 158.824 227.932  1.00  0.00           H
ATOM   2632  CA  CYS   164     128.259 159.283 227.265  1.00  0.00           C
ATOM   2633  HA  CYS   164     128.648 160.104 226.661  1.00  0.00           H
ATOM   2634  CB  CYS   164     129.137 159.187 228.526  1.00  0.00           C
ATOM   2635  HB2 CYS   164     130.140 158.864 228.243  1.00  0.00           H
ATOM   2636  HB3 CYS   164     129.205 160.171 228.992  1.00  0.00           H
ATOM   2637  SG  CYS   164     128.460 158.012 229.739  1.00  0.00           S
ATOM   2638  HG  CYS   164     127.457 158.800 230.168  1.00  0.00           H
ATOM   2639  C   CYS   164     128.366 158.017 226.397  1.00  0.00           C
ATOM   2640  O   CYS   164     127.515 157.128 226.447  1.00  0.00           O
ATOM   2641  N   ASP   165     129.419 157.962 225.579  1.00  0.00           N
ATOM   2642  H   ASP   165     130.021 158.769 225.528  1.00  0.00           H
ATOM   2643  CA  ASP   165     129.846 156.792 224.804  1.00  0.00           C
ATOM   2644  HA  ASP   165     128.992 156.356 224.287  1.00  0.00           H
ATOM   2645  CB  ASP   165     130.832 157.265 223.721  1.00  0.00           C
ATOM   2646  HB2 ASP   165     130.290 157.870 222.993  1.00  0.00           H
ATOM   2647  HB3 ASP   165     131.589 157.900 224.187  1.00  0.00           H
ATOM   2648  CG  ASP   165     131.546 156.122 222.986  1.00  0.00           C
ATOM   2649  OD1 ASP   165     131.026 154.981 222.957  1.00  0.00           O
ATOM   2650  OD2 ASP   165     132.657 156.372 222.474  1.00  0.00           O
ATOM   2651  C   ASP   165     130.512 155.739 225.720  1.00  0.00           C
ATOM   2652  O   ASP   165     131.551 156.031 226.325  1.00  0.00           O
ATOM   2653  N   PRO   166     129.983 154.503 225.815  1.00  0.00           N
ATOM   2654  CD  PRO   166     128.672 154.075 225.349  1.00  0.00           C
ATOM   2655  HD2 PRO   166     128.754 153.686 224.332  1.00  0.00           H
ATOM   2656  HD3 PRO   166     127.935 154.875 225.389  1.00  0.00           H
ATOM   2657  CG  PRO   166     128.270 152.965 226.311  1.00  0.00           C
ATOM   2658  HG2 PRO   166     127.540 152.287 225.872  1.00  0.00           H
ATOM   2659  HG3 PRO   166     127.891 153.397 227.239  1.00  0.00           H
ATOM   2660  CB  PRO   166     129.607 152.276 226.564  1.00  0.00           C
ATOM   2661  HB2 PRO   166     129.818 151.608 225.728  1.00  0.00           H
ATOM   2662  HB3 PRO   166     129.603 151.725 227.504  1.00  0.00           H
ATOM   2663  CA  PRO   166     130.618 153.432 226.583  1.00  0.00           C
ATOM   2664  HA  PRO   166     130.751 153.775 227.610  1.00  0.00           H
ATOM   2665  C   PRO   166     131.982 152.977 226.035  1.00  0.00           C
ATOM   2666  O   PRO   166     132.774 152.408 226.786  1.00  0.00           O
ATOM   2667  N   THR   167     132.275 153.196 224.747  1.00  0.00           N
ATOM   2668  H   THR   167     131.618 153.751 224.198  1.00  0.00           H
ATOM   2669  CA  THR   167     133.387 152.563 224.008  1.00  0.00           C
ATOM   2670  HA  THR   167     133.197 151.493 223.957  1.00  0.00           H
ATOM   2671  CB  THR   167     133.463 153.100 222.568  1.00  0.00           C
ATOM   2672  HB  THR   167     133.668 154.167 222.595  1.00  0.00           H
ATOM   2673  CG2 THR   167     134.553 152.442 221.720  1.00  0.00           C
ATOM   2674 HG21 THR   167     135.534 152.786 222.047  1.00  0.00           H
ATOM   2675 HG22 THR   167     134.419 152.724 220.676  1.00  0.00           H
ATOM   2676 HG23 THR   167     134.507 151.361 221.814  1.00  0.00           H
ATOM   2677  OG1 THR   167     132.230 152.891 221.925  1.00  0.00           O
ATOM   2678  HG1 THR   167     131.683 153.674 222.180  1.00  0.00           H
ATOM   2679  C   THR   167     134.745 152.751 224.676  1.00  0.00           C
ATOM   2680  O   THR   167     135.484 151.780 224.839  1.00  0.00           O
ATOM   2681  N   PHE   168     135.066 153.974 225.111  1.00  0.00           N
ATOM   2682  H   PHE   168     134.409 154.727 224.950  1.00  0.00           H
ATOM   2683  CA  PHE   168     136.323 154.259 225.809  1.00  0.00           C
ATOM   2684  HA  PHE   168     137.157 153.969 225.168  1.00  0.00           H
ATOM   2685  CB  PHE   168     136.419 155.768 226.081  1.00  0.00           C
ATOM   2686  HB2 PHE   168     136.470 156.294 225.126  1.00  0.00           H
ATOM   2687  HB3 PHE   168     135.509 156.097 226.586  1.00  0.00           H
ATOM   2688  CG  PHE   168     137.618 156.169 226.924  1.00  0.00           C
ATOM   2689  CD1 PHE   168     138.900 156.228 226.345  1.00  0.00           C
ATOM   2690  HD1 PHE   168     139.032 155.999 225.297  1.00  0.00           H
ATOM   2691  CE1 PHE   168     140.015 156.572 227.129  1.00  0.00           C
ATOM   2692  HE1 PHE   168     140.999 156.604 226.682  1.00  0.00           H
ATOM   2693  CZ  PHE   168     139.853 156.857 228.497  1.00  0.00           C
ATOM   2694  HZ  PHE   168     140.713 157.107 229.101  1.00  0.00           H
ATOM   2695  CE2 PHE   168     138.575 156.797 229.080  1.00  0.00           C
ATOM   2696  HE2 PHE   168     138.453 157.004 230.134  1.00  0.00           H
ATOM   2697  CD2 PHE   168     137.459 156.453 228.296  1.00  0.00           C
ATOM   2698  HD2 PHE   168     136.480 156.399 228.751  1.00  0.00           H
ATOM   2699  C   PHE   168     136.454 153.450 227.108  1.00  0.00           C
ATOM   2700  O   PHE   168     137.482 152.820 227.350  1.00  0.00           O
ATOM   2701  N   ILE   169     135.400 153.425 227.928  1.00  0.00           N
ATOM   2702  H   ILE   169     134.542 153.858 227.612  1.00  0.00           H
ATOM   2703  CA  ILE   169     135.398 152.748 229.232  1.00  0.00           C
ATOM   2704  HA  ILE   169     136.282 153.069 229.784  1.00  0.00           H
ATOM   2705  CB  ILE   169     134.143 153.139 230.054  1.00  0.00           C
ATOM   2706  HB  ILE   169     133.271 152.678 229.587  1.00  0.00           H
ATOM   2707  CG2 ILE   169     134.289 152.579 231.479  1.00  0.00           C
ATOM   2708 HG21 ILE   169     134.480 151.509 231.450  1.00  0.00           H
ATOM   2709 HG22 ILE   169     133.375 152.738 232.050  1.00  0.00           H
ATOM   2710 HG23 ILE   169     135.122 153.063 231.988  1.00  0.00           H
ATOM   2711  CG1 ILE   169     133.903 154.670 230.112  1.00  0.00           C
ATOM   2712 HG12 ILE   169     134.709 155.146 230.671  1.00  0.00           H
ATOM   2713 HG13 ILE   169     133.903 155.083 229.104  1.00  0.00           H
ATOM   2714  CD1 ILE   169     132.555 155.063 230.734  1.00  0.00           C
ATOM   2715 HD11 ILE   169     131.742 154.566 230.203  1.00  0.00           H
ATOM   2716 HD12 ILE   169     132.422 156.142 230.651  1.00  0.00           H
ATOM   2717 HD13 ILE   169     132.520 154.792 231.788  1.00  0.00           H
ATOM   2718  C   ILE   169     135.494 151.223 229.045  1.00  0.00           C
ATOM   2719  O   ILE   169     136.279 150.560 229.726  1.00  0.00           O
ATOM   2720  N   LEU   170     134.738 150.682 228.085  1.00  0.00           N
ATOM   2721  H   LEU   170     134.123 151.304 227.568  1.00  0.00           H
ATOM   2722  CA  LEU   170     134.692 149.255 227.748  1.00  0.00           C
ATOM   2723  HA  LEU   170     134.567 148.678 228.665  1.00  0.00           H
ATOM   2724  CB  LEU   170     133.480 148.999 226.834  1.00  0.00           C
ATOM   2725  HB2 LEU   170     133.358 149.844 226.156  1.00  0.00           H
ATOM   2726  HB3 LEU   170     133.689 148.123 226.217  1.00  0.00           H
ATOM   2727  CG  LEU   170     132.158 148.718 227.578  1.00  0.00           C
ATOM   2728  HG  LEU   170     132.224 147.733 228.040  1.00  0.00           H
ATOM   2729  CD1 LEU   170     131.777 149.719 228.672  1.00  0.00           C
ATOM   2730 HD11 LEU   170     132.532 149.720 229.456  1.00  0.00           H
ATOM   2731 HD12 LEU   170     130.824 149.432 229.117  1.00  0.00           H
ATOM   2732 HD13 LEU   170     131.689 150.719 228.256  1.00  0.00           H
ATOM   2733  CD2 LEU   170     131.033 148.696 226.547  1.00  0.00           C
ATOM   2734 HD21 LEU   170     131.017 149.630 225.988  1.00  0.00           H
ATOM   2735 HD22 LEU   170     131.210 147.869 225.864  1.00  0.00           H
ATOM   2736 HD23 LEU   170     130.071 148.558 227.036  1.00  0.00           H
ATOM   2737  C   LEU   170     135.986 148.741 227.098  1.00  0.00           C
ATOM   2738  O   LEU   170     136.279 147.561 227.251  1.00  0.00           O
ATOM   2739  N   GLY   171     136.776 149.595 226.437  1.00  0.00           N
ATOM   2740  H   GLY   171     136.420 150.521 226.234  1.00  0.00           H
ATOM   2741  CA  GLY   171     138.141 149.261 226.009  1.00  0.00           C
ATOM   2742  HA2 GLY   171     138.165 148.248 225.602  1.00  0.00           H
ATOM   2743  HA3 GLY   171     138.440 149.953 225.223  1.00  0.00           H
ATOM   2744  C   GLY   171     139.168 149.357 227.148  1.00  0.00           C
ATOM   2745  O   GLY   171     140.052 148.508 227.270  1.00  0.00           O
ATOM   2746  N   CYS   172     139.027 150.355 228.028  1.00  0.00           N
ATOM   2747  H   CYS   172     138.304 151.044 227.860  1.00  0.00           H
ATOM   2748  CA  CYS   172     139.907 150.545 229.185  1.00  0.00           C
ATOM   2749  HA  CYS   172     140.944 150.586 228.848  1.00  0.00           H
ATOM   2750  CB  CYS   172     139.555 151.864 229.880  1.00  0.00           C
ATOM   2751  HB2 CYS   172     138.477 151.915 230.040  1.00  0.00           H
ATOM   2752  HB3 CYS   172     140.055 151.885 230.848  1.00  0.00           H
ATOM   2753  SG  CYS   172     140.095 153.308 228.933  1.00  0.00           S
ATOM   2754  HG  CYS   172     139.171 153.219 227.963  1.00  0.00           H
ATOM   2755  C   CYS   172     139.810 149.417 230.222  1.00  0.00           C
ATOM   2756  O   CYS   172     140.836 148.967 230.732  1.00  0.00           O
ATOM   2757  N   ALA   173     138.596 148.976 230.568  1.00  0.00           N
ATOM   2758  H   ALA   173     137.783 149.393 230.123  1.00  0.00           H
ATOM   2759  CA  ALA   173     138.376 148.010 231.646  1.00  0.00           C
ATOM   2760  HA  ALA   173     138.812 148.434 232.552  1.00  0.00           H
ATOM   2761  CB  ALA   173     136.864 147.877 231.900  1.00  0.00           C
ATOM   2762  HB1 ALA   173     136.664 147.016 232.539  1.00  0.00           H
ATOM   2763  HB2 ALA   173     136.306 147.768 230.972  1.00  0.00           H
ATOM   2764  HB3 ALA   173     136.501 148.778 232.392  1.00  0.00           H
ATOM   2765  C   ALA   173     139.118 146.668 231.418  1.00  0.00           C
ATOM   2766  O   ALA   173     139.884 146.270 232.302  1.00  0.00           O
ATOM   2767  N   PRO   174     139.019 146.013 230.240  1.00  0.00           N
ATOM   2768  CD  PRO   174     138.061 146.260 229.179  1.00  0.00           C
ATOM   2769  HD2 PRO   174     138.440 147.037 228.519  1.00  0.00           H
ATOM   2770  HD3 PRO   174     137.078 146.523 229.554  1.00  0.00           H
ATOM   2771  CG  PRO   174     137.950 144.951 228.418  1.00  0.00           C
ATOM   2772  HG2 PRO   174     137.628 145.110 227.388  1.00  0.00           H
ATOM   2773  HG3 PRO   174     137.271 144.285 228.952  1.00  0.00           H
ATOM   2774  CB  PRO   174     139.372 144.415 228.494  1.00  0.00           C
ATOM   2775  HB2 PRO   174     139.969 144.908 227.727  1.00  0.00           H
ATOM   2776  HB3 PRO   174     139.413 143.332 228.373  1.00  0.00           H
ATOM   2777  CA  PRO   174     139.831 144.847 229.889  1.00  0.00           C
ATOM   2778  HA  PRO   174     139.627 144.045 230.600  1.00  0.00           H
ATOM   2779  C   PRO   174     141.330 145.145 229.878  1.00  0.00           C
ATOM   2780  O   PRO   174     142.112 144.354 230.396  1.00  0.00           O
ATOM   2781  N   CYS   175     141.750 146.300 229.354  1.00  0.00           N
ATOM   2782  H   CYS   175     141.083 146.913 228.903  1.00  0.00           H
ATOM   2783  CA  CYS   175     143.166 146.666 229.317  1.00  0.00           C
ATOM   2784  HA  CYS   175     143.706 145.883 228.783  1.00  0.00           H
ATOM   2785  CB  CYS   175     143.309 147.971 228.526  1.00  0.00           C
ATOM   2786  HB2 CYS   175     142.648 147.956 227.658  1.00  0.00           H
ATOM   2787  HB3 CYS   175     143.038 148.824 229.150  1.00  0.00           H
ATOM   2788  SG  CYS   175     145.020 148.123 227.945  1.00  0.00           S
ATOM   2789  HG  CYS   175     144.831 149.257 227.258  1.00  0.00           H
ATOM   2790  C   CYS   175     143.764 146.767 230.734  1.00  0.00           C
ATOM   2791  O   CYS   175     144.892 146.338 230.976  1.00  0.00           O
ATOM   2792  N   ASN   176     142.986 147.255 231.707  1.00  0.00           N
ATOM   2793  H   ASN   176     142.077 147.620 231.440  1.00  0.00           H
ATOM   2794  CA  ASN   176     143.363 147.305 233.121  1.00  0.00           C
ATOM   2795  HA  ASN   176     144.392 147.663 233.183  1.00  0.00           H
ATOM   2796  CB  ASN   176     142.449 148.327 233.804  1.00  0.00           C
ATOM   2797  HB2 ASN   176     142.257 149.160 233.131  1.00  0.00           H
ATOM   2798  HB3 ASN   176     141.495 147.852 234.012  1.00  0.00           H
ATOM   2799  CG  ASN   176     143.017 148.925 235.079  1.00  0.00           C
ATOM   2800  OD1 ASN   176     144.204 148.886 235.374  1.00  0.00           O
ATOM   2801  ND2 ASN   176     142.171 149.539 235.864  1.00  0.00           N
ATOM   2802 HD21 ASN   176     141.177 149.509 235.654  1.00  0.00           H
ATOM   2803 HD22 ASN   176     142.551 150.073 236.631  1.00  0.00           H
ATOM   2804  C   ASN   176     143.301 145.928 233.821  1.00  0.00           C
ATOM   2805  O   ASN   176     144.137 145.643 234.681  1.00  0.00           O
ATOM   2806  N   VAL   177     142.376 145.036 233.432  1.00  0.00           N
ATOM   2807  H   VAL   177     141.677 145.330 232.756  1.00  0.00           H
ATOM   2808  CA  VAL   177     142.424 143.606 233.818  1.00  0.00           C
ATOM   2809  HA  VAL   177     142.418 143.531 234.905  1.00  0.00           H
ATOM   2810  CB  VAL   177     141.208 142.815 233.276  1.00  0.00           C
ATOM   2811  HB  VAL   177     141.082 143.027 232.218  1.00  0.00           H
ATOM   2812  CG1 VAL   177     141.356 141.293 233.420  1.00  0.00           C
ATOM   2813 HG11 VAL   177     141.465 141.019 234.469  1.00  0.00           H
ATOM   2814 HG12 VAL   177     140.475 140.806 233.002  1.00  0.00           H
ATOM   2815 HG13 VAL   177     142.215 140.931 232.856  1.00  0.00           H
ATOM   2816  CG2 VAL   177     139.916 143.211 233.997  1.00  0.00           C
ATOM   2817 HG21 VAL   177     139.076 142.659 233.576  1.00  0.00           H
ATOM   2818 HG22 VAL   177     139.720 144.269 233.852  1.00  0.00           H
ATOM   2819 HG23 VAL   177     139.997 142.994 235.062  1.00  0.00           H
ATOM   2820  C   VAL   177     143.731 142.974 233.328  1.00  0.00           C
ATOM   2821  O   VAL   177     144.409 142.286 234.090  1.00  0.00           O
ATOM   2822  N   ILE   178     144.128 143.257 232.085  1.00  0.00           N
ATOM   2823  H   ILE   178     143.502 143.793 231.490  1.00  0.00           H
ATOM   2824  CA  ILE   178     145.360 142.729 231.493  1.00  0.00           C
ATOM   2825  HA  ILE   178     145.388 141.666 231.700  1.00  0.00           H
ATOM   2826  CB  ILE   178     145.335 142.846 229.955  1.00  0.00           C
ATOM   2827  HB  ILE   178     145.201 143.894 229.683  1.00  0.00           H
ATOM   2828  CG2 ILE   178     146.668 142.339 229.380  1.00  0.00           C
ATOM   2829 HG21 ILE   178     147.495 142.972 229.697  1.00  0.00           H
ATOM   2830 HG22 ILE   178     146.630 142.359 228.297  1.00  0.00           H
ATOM   2831 HG23 ILE   178     146.856 141.314 229.700  1.00  0.00           H
ATOM   2832  CG1 ILE   178     144.176 141.997 229.365  1.00  0.00           C
ATOM   2833 HG12 ILE   178     144.501 140.963 229.238  1.00  0.00           H
ATOM   2834 HG13 ILE   178     143.329 141.978 230.049  1.00  0.00           H
ATOM   2835  CD1 ILE   178     143.640 142.522 228.028  1.00  0.00           C
ATOM   2836 HD11 ILE   178     143.317 143.557 228.132  1.00  0.00           H
ATOM   2837 HD12 ILE   178     142.789 141.915 227.720  1.00  0.00           H
ATOM   2838 HD13 ILE   178     144.405 142.461 227.263  1.00  0.00           H
ATOM   2839  C   ILE   178     146.599 143.337 232.174  1.00  0.00           C
ATOM   2840  O   ILE   178     147.501 142.594 232.553  1.00  0.00           O
ATOM   2841  N   CYS   179     146.610 144.636 232.493  1.00  0.00           N
ATOM   2842  H   CYS   179     145.877 145.229 232.119  1.00  0.00           H
ATOM   2843  CA  CYS   179     147.623 145.230 233.381  1.00  0.00           C
ATOM   2844  HA  CYS   179     148.605 145.124 232.917  1.00  0.00           H
ATOM   2845  CB  CYS   179     147.339 146.727 233.585  1.00  0.00           C
ATOM   2846  HB2 CYS   179     146.325 146.873 233.958  1.00  0.00           H
ATOM   2847  HB3 CYS   179     148.027 147.125 234.334  1.00  0.00           H
ATOM   2848  SG  CYS   179     147.571 147.645 232.035  1.00  0.00           S
ATOM   2849  HG  CYS   179     146.507 147.148 231.382  1.00  0.00           H
ATOM   2850  C   CYS   179     147.684 144.517 234.746  1.00  0.00           C
ATOM   2851  O   CYS   179     148.772 144.272 235.269  1.00  0.00           O
ATOM   2852  N   SER   180     146.535 144.119 235.297  1.00  0.00           N
ATOM   2853  H   SER   180     145.673 144.359 234.821  1.00  0.00           H
ATOM   2854  CA  SER   180     146.438 143.411 236.579  1.00  0.00           C
ATOM   2855  HA  SER   180     147.066 143.939 237.296  1.00  0.00           H
ATOM   2856  CB  SER   180     145.006 143.470 237.125  1.00  0.00           C
ATOM   2857  HB2 SER   180     144.324 142.934 236.467  1.00  0.00           H
ATOM   2858  HB3 SER   180     144.983 142.995 238.107  1.00  0.00           H
ATOM   2859  OG  SER   180     144.580 144.812 237.263  1.00  0.00           O
ATOM   2860  HG  SER   180     144.427 145.184 236.375  1.00  0.00           H
ATOM   2861  C   SER   180     146.935 141.955 236.534  1.00  0.00           C
ATOM   2862  O   SER   180     147.318 141.437 237.585  1.00  0.00           O
ATOM   2863  N   ILE   181     146.983 141.287 235.369  1.00  0.00           N
ATOM   2864  H   ILE   181     146.578 141.725 234.547  1.00  0.00           H
ATOM   2865  CA  ILE   181     147.684 139.991 235.208  1.00  0.00           C
ATOM   2866  HA  ILE   181     147.760 139.527 236.192  1.00  0.00           H
ATOM   2867  CB  ILE   181     146.915 138.966 234.336  1.00  0.00           C
ATOM   2868  HB  ILE   181     147.534 138.068 234.305  1.00  0.00           H
ATOM   2869  CG2 ILE   181     145.585 138.572 234.997  1.00  0.00           C
ATOM   2870 HG21 ILE   181     145.776 138.211 236.005  1.00  0.00           H
ATOM   2871 HG22 ILE   181     145.108 137.769 234.435  1.00  0.00           H
ATOM   2872 HG23 ILE   181     144.910 139.429 235.027  1.00  0.00           H
ATOM   2873  CG1 ILE   181     146.679 139.406 232.881  1.00  0.00           C
ATOM   2874 HG12 ILE   181     145.813 140.062 232.862  1.00  0.00           H
ATOM   2875 HG13 ILE   181     147.543 139.952 232.516  1.00  0.00           H
ATOM   2876  CD1 ILE   181     146.441 138.242 231.911  1.00  0.00           C
ATOM   2877 HD11 ILE   181     147.297 137.566 231.926  1.00  0.00           H
ATOM   2878 HD12 ILE   181     146.323 138.637 230.901  1.00  0.00           H
ATOM   2879 HD13 ILE   181     145.539 137.694 232.180  1.00  0.00           H
ATOM   2880  C   ILE   181     149.140 140.133 234.737  1.00  0.00           C
ATOM   2881  O   ILE   181     149.959 139.316 235.143  1.00  0.00           O
ATOM   2882  N   ILE   182     149.499 141.145 233.936  1.00  0.00           N
ATOM   2883  H   ILE   182     148.767 141.753 233.581  1.00  0.00           H
ATOM   2884  CA  ILE   182     150.865 141.325 233.405  1.00  0.00           C
ATOM   2885  HA  ILE   182     151.314 140.341 233.285  1.00  0.00           H
ATOM   2886  CB  ILE   182     150.846 141.988 232.003  1.00  0.00           C
ATOM   2887  HB  ILE   182     150.324 142.944 232.086  1.00  0.00           H
ATOM   2888  CG2 ILE   182     152.272 142.290 231.502  1.00  0.00           C
ATOM   2889 HG21 ILE   182     152.738 143.056 232.121  1.00  0.00           H
ATOM   2890 HG22 ILE   182     152.238 142.666 230.479  1.00  0.00           H
ATOM   2891 HG23 ILE   182     152.888 141.391 231.533  1.00  0.00           H
ATOM   2892  CG1 ILE   182     150.102 141.147 230.936  1.00  0.00           C
ATOM   2893 HG12 ILE   182     149.048 141.090 231.195  1.00  0.00           H
ATOM   2894 HG13 ILE   182     150.158 141.669 229.979  1.00  0.00           H
ATOM   2895  CD1 ILE   182     150.611 139.713 230.730  1.00  0.00           C
ATOM   2896 HD11 ILE   182     151.674 139.708 230.492  1.00  0.00           H
ATOM   2897 HD12 ILE   182     150.068 139.260 229.903  1.00  0.00           H
ATOM   2898 HD13 ILE   182     150.430 139.117 231.624  1.00  0.00           H
ATOM   2899  C   ILE   182     151.780 142.069 234.388  1.00  0.00           C
ATOM   2900  O   ILE   182     152.845 141.561 234.718  1.00  0.00           O
ATOM   2901  N   PHE   183     151.381 143.245 234.884  1.00  0.00           N
ATOM   2902  H   PHE   183     150.473 143.600 234.606  1.00  0.00           H
ATOM   2903  CA  PHE   183     152.184 144.080 235.797  1.00  0.00           C
ATOM   2904  HA  PHE   183     153.236 143.804 235.712  1.00  0.00           H
ATOM   2905  CB  PHE   183     152.025 145.562 235.407  1.00  0.00           C
ATOM   2906  HB2 PHE   183     151.022 145.883 235.693  1.00  0.00           H
ATOM   2907  HB3 PHE   183     152.728 146.152 235.996  1.00  0.00           H
ATOM   2908  CG  PHE   183     152.241 145.917 233.949  1.00  0.00           C
ATOM   2909  CD1 PHE   183     153.428 145.544 233.294  1.00  0.00           C
ATOM   2910  HD1 PHE   183     154.185 144.978 233.817  1.00  0.00           H
ATOM   2911  CE1 PHE   183     153.637 145.911 231.954  1.00  0.00           C
ATOM   2912  HE1 PHE   183     154.548 145.616 231.457  1.00  0.00           H
ATOM   2913  CZ  PHE   183     152.665 146.663 231.268  1.00  0.00           C
ATOM   2914  HZ  PHE   183     152.828 146.958 230.242  1.00  0.00           H
ATOM   2915  CE2 PHE   183     151.481 147.042 231.922  1.00  0.00           C
ATOM   2916  HE2 PHE   183     150.736 147.628 231.400  1.00  0.00           H
ATOM   2917  CD2 PHE   183     151.270 146.669 233.260  1.00  0.00           C
ATOM   2918  HD2 PHE   183     150.365 146.978 233.763  1.00  0.00           H
ATOM   2919  C   PHE   183     151.789 143.957 237.278  1.00  0.00           C
ATOM   2920  O   PHE   183     152.501 144.472 238.140  1.00  0.00           O
ATOM   2921  N   HID   184     150.597 143.415 237.545  1.00  0.00           N
ATOM   2922  H   HID   184     150.106 143.059 236.737  1.00  0.00           H
ATOM   2923  CA  HID   184     149.757 143.611 238.740  1.00  0.00           C
ATOM   2924  HA  HID   184     148.825 143.109 238.505  1.00  0.00           H
ATOM   2925  CB  HID   184     150.319 142.905 239.987  1.00  0.00           C
ATOM   2926  HB2 HID   184     150.627 141.895 239.732  1.00  0.00           H
ATOM   2927  HB3 HID   184     151.196 143.445 240.347  1.00  0.00           H
ATOM   2928  CG  HID   184     149.305 142.799 241.107  1.00  0.00           C
ATOM   2929  ND1 HID   184     149.569 142.849 242.455  1.00  0.00           N
ATOM   2930  HD1 HID   184     150.490 142.925 242.893  1.00  0.00           H
ATOM   2931  CE1 HID   184     148.419 142.667 243.120  1.00  0.00           C
ATOM   2932  HE1 HID   184     148.328 142.643 244.199  1.00  0.00           H
ATOM   2933  NE2 HID   184     147.401 142.492 242.260  1.00  0.00           N
ATOM   2934  CD2 HID   184     147.962 142.555 240.981  1.00  0.00           C
ATOM   2935  HD2 HID   184     147.424 142.433 240.052  1.00  0.00           H
ATOM   2936  C   HID   184     149.349 145.068 239.044  1.00  0.00           C
ATOM   2937  O   HID   184     148.277 145.286 239.607  1.00  0.00           O
ATOM   2938  N   LYS   185     150.149 146.071 238.655  1.00  0.00           N
ATOM   2939  H   LYS   185     151.044 145.810 238.263  1.00  0.00           H
ATOM   2940  CA  LYS   185     149.883 147.500 238.883  1.00  0.00           C
ATOM   2941  HA  LYS   185     149.809 147.646 239.960  1.00  0.00           H
ATOM   2942  CB  LYS   185     151.076 148.330 238.364  1.00  0.00           C
ATOM   2943  HB2 LYS   185     152.009 147.828 238.626  1.00  0.00           H
ATOM   2944  HB3 LYS   185     151.031 148.376 237.274  1.00  0.00           H
ATOM   2945  CG  LYS   185     151.128 149.768 238.918  1.00  0.00           C
ATOM   2946  HG2 LYS   185     151.834 150.332 238.307  1.00  0.00           H
ATOM   2947  HG3 LYS   185     150.148 150.239 238.824  1.00  0.00           H
ATOM   2948  CD  LYS   185     151.601 149.833 240.384  1.00  0.00           C
ATOM   2949  HD2 LYS   185     150.853 149.388 241.040  1.00  0.00           H
ATOM   2950  HD3 LYS   185     152.531 149.268 240.473  1.00  0.00           H
ATOM   2951  CE  LYS   185     151.860 151.286 240.813  1.00  0.00           C
ATOM   2952  HE2 LYS   185     152.466 151.765 240.038  1.00  0.00           H
ATOM   2953  HE3 LYS   185     150.909 151.822 240.880  1.00  0.00           H
ATOM   2954  NZ  LYS   185     152.592 151.358 242.102  1.00  0.00           N
ATOM   2955  HZ1 LYS   185     152.948 152.294 242.285  1.00  0.00           H
ATOM   2956  HZ2 LYS   185     153.421 150.766 242.069  1.00  0.00           H
ATOM   2957  HZ3 LYS   185     152.035 151.071 242.906  1.00  0.00           H
ATOM   2958  C   LYS   185     148.543 147.938 238.260  1.00  0.00           C
ATOM   2959  O   LYS   185     148.441 148.194 237.063  1.00  0.00           O
ATOM   2960  N   ARG   186     147.523 148.020 239.116  1.00  0.00           N
ATOM   2961  H   ARG   186     147.698 147.643 240.035  1.00  0.00           H
ATOM   2962  CA  ARG   186     146.178 148.550 238.860  1.00  0.00           C
ATOM   2963  HA  ARG   186     145.736 148.040 238.001  1.00  0.00           H
ATOM   2964  CB  ARG   186     145.349 148.246 240.126  1.00  0.00           C
ATOM   2965  HB2 ARG   186     145.223 147.164 240.204  1.00  0.00           H
ATOM   2966  HB3 ARG   186     145.929 148.565 240.994  1.00  0.00           H
ATOM   2967  CG  ARG   186     143.970 148.906 240.261  1.00  0.00           C
ATOM   2968  HG2 ARG   186     143.605 148.662 241.261  1.00  0.00           H
ATOM   2969  HG3 ARG   186     144.062 149.991 240.205  1.00  0.00           H
ATOM   2970  CD  ARG   186     142.927 148.428 239.245  1.00  0.00           C
ATOM   2971  HD2 ARG   186     143.069 148.933 238.292  1.00  0.00           H
ATOM   2972  HD3 ARG   186     143.055 147.355 239.084  1.00  0.00           H
ATOM   2973  NE  ARG   186     141.571 148.647 239.775  1.00  0.00           N
ATOM   2974  HE  ARG   186     141.141 147.846 240.245  1.00  0.00           H
ATOM   2975  CZ  ARG   186     140.896 149.771 239.931  1.00  0.00           C
ATOM   2976  NH1 ARG   186     141.219 150.911 239.396  1.00  0.00           N
ATOM   2977 HH11 ARG   186     142.046 150.960 238.819  1.00  0.00           H
ATOM   2978 HH12 ARG   186     140.591 151.714 239.417  1.00  0.00           H
ATOM   2979  NH2 ARG   186     139.852 149.753 240.694  1.00  0.00           N
ATOM   2980 HH21 ARG   186     139.623 148.840 241.106  1.00  0.00           H
ATOM   2981 HH22 ARG   186     139.359 150.595 240.894  1.00  0.00           H
ATOM   2982  C   ARG   186     146.249 150.049 238.557  1.00  0.00           C
ATOM   2983  O   ARG   186     146.627 150.833 239.426  1.00  0.00           O
ATOM   2984  N   PHE   187     145.849 150.444 237.353  1.00  0.00           N
ATOM   2985  H   PHE   187     145.557 149.738 236.688  1.00  0.00           H
ATOM   2986  CA  PHE   187     145.583 151.843 237.000  1.00  0.00           C
ATOM   2987  HA  PHE   187     146.232 152.502 237.579  1.00  0.00           H
ATOM   2988  CB  PHE   187     145.896 152.047 235.511  1.00  0.00           C
ATOM   2989  HB2 PHE   187     145.253 151.386 234.929  1.00  0.00           H
ATOM   2990  HB3 PHE   187     145.643 153.070 235.234  1.00  0.00           H
ATOM   2991  CG  PHE   187     147.343 151.801 235.122  1.00  0.00           C
ATOM   2992  CD1 PHE   187     148.283 152.846 235.207  1.00  0.00           C
ATOM   2993  HD1 PHE   187     147.986 153.821 235.569  1.00  0.00           H
ATOM   2994  CE1 PHE   187     149.615 152.634 234.815  1.00  0.00           C
ATOM   2995  HE1 PHE   187     150.330 153.443 234.877  1.00  0.00           H
ATOM   2996  CZ  PHE   187     150.017 151.372 234.345  1.00  0.00           C
ATOM   2997  HZ  PHE   187     151.044 151.210 234.049  1.00  0.00           H
ATOM   2998  CE2 PHE   187     149.084 150.324 234.263  1.00  0.00           C
ATOM   2999  HE2 PHE   187     149.392 149.353 233.905  1.00  0.00           H
ATOM   3000  CD2 PHE   187     147.748 150.538 234.649  1.00  0.00           C
ATOM   3001  HD2 PHE   187     147.035 149.728 234.586  1.00  0.00           H
ATOM   3002  C   PHE   187     144.122 152.211 237.313  1.00  0.00           C
ATOM   3003  O   PHE   187     143.329 151.355 237.704  1.00  0.00           O
ATOM   3004  N   ASP   188     143.728 153.464 237.093  1.00  0.00           N
ATOM   3005  H   ASP   188     144.410 154.119 236.734  1.00  0.00           H
ATOM   3006  CA  ASP   188     142.323 153.889 236.994  1.00  0.00           C
ATOM   3007  HA  ASP   188     141.716 153.017 236.745  1.00  0.00           H
ATOM   3008  CB  ASP   188     141.819 154.437 238.345  1.00  0.00           C
ATOM   3009  HB2 ASP   188     142.264 153.853 239.154  1.00  0.00           H
ATOM   3010  HB3 ASP   188     142.146 155.471 238.463  1.00  0.00           H
ATOM   3011  CG  ASP   188     140.292 154.349 238.484  1.00  0.00           C
ATOM   3012  OD1 ASP   188     139.595 155.309 238.077  1.00  0.00           O
ATOM   3013  OD2 ASP   188     139.791 153.313 238.980  1.00  0.00           O
ATOM   3014  C   ASP   188     142.180 154.886 235.826  1.00  0.00           C
ATOM   3015  O   ASP   188     143.178 155.427 235.340  1.00  0.00           O
ATOM   3016  N   TYR   189     140.955 155.105 235.342  1.00  0.00           N
ATOM   3017  H   TYR   189     140.184 154.717 235.869  1.00  0.00           H
ATOM   3018  CA  TYR   189     140.627 155.660 234.017  1.00  0.00           C
ATOM   3019  HA  TYR   189     141.282 155.168 233.298  1.00  0.00           H
ATOM   3020  CB  TYR   189     139.175 155.295 233.637  1.00  0.00           C
ATOM   3021  HB2 TYR   189     138.515 155.964 234.173  1.00  0.00           H
ATOM   3022  HB3 TYR   189     139.040 155.512 232.576  1.00  0.00           H
ATOM   3023  CG  TYR   189     138.673 153.884 233.911  1.00  0.00           C
ATOM   3024  CD1 TYR   189     138.369 153.026 232.838  1.00  0.00           C
ATOM   3025  HD1 TYR   189     138.526 153.367 231.826  1.00  0.00           H
ATOM   3026  CE1 TYR   189     137.810 151.753 233.077  1.00  0.00           C
ATOM   3027  HE1 TYR   189     137.551 151.100 232.258  1.00  0.00           H
ATOM   3028  CZ  TYR   189     137.543 151.340 234.400  1.00  0.00           C
ATOM   3029  OH  TYR   189     136.977 150.131 234.650  1.00  0.00           O
ATOM   3030  HH  TYR   189     136.749 150.068 235.584  1.00  0.00           H
ATOM   3031  CE2 TYR   189     137.823 152.209 235.473  1.00  0.00           C
ATOM   3032  HE2 TYR   189     137.588 151.918 236.484  1.00  0.00           H
ATOM   3033  CD2 TYR   189     138.374 153.477 235.227  1.00  0.00           C
ATOM   3034  HD2 TYR   189     138.518 154.154 236.054  1.00  0.00           H
ATOM   3035  C   TYR   189     140.876 157.184 233.864  1.00  0.00           C
ATOM   3036  O   TYR   189     140.053 157.893 233.276  1.00  0.00           O
ATOM   3037  N   LYS   190     141.957 157.712 234.454  1.00  0.00           N
ATOM   3038  H   LYS   190     142.552 157.046 234.934  1.00  0.00           H
ATOM   3039  CA  LYS   190     142.388 159.124 234.422  1.00  0.00           C
ATOM   3040  HA  LYS   190     142.031 159.579 233.497  1.00  0.00           H
ATOM   3041  CB  LYS   190     141.789 159.909 235.613  1.00  0.00           C
ATOM   3042  HB2 LYS   190     142.035 159.412 236.552  1.00  0.00           H
ATOM   3043  HB3 LYS   190     142.264 160.892 235.637  1.00  0.00           H
ATOM   3044  CG  LYS   190     140.273 160.160 235.520  1.00  0.00           C
ATOM   3045  HG2 LYS   190     140.069 161.164 235.896  1.00  0.00           H
ATOM   3046  HG3 LYS   190     139.964 160.146 234.475  1.00  0.00           H
ATOM   3047  CD  LYS   190     139.428 159.179 236.350  1.00  0.00           C
ATOM   3048  HD2 LYS   190     139.793 158.156 236.244  1.00  0.00           H
ATOM   3049  HD3 LYS   190     139.516 159.456 237.402  1.00  0.00           H
ATOM   3050  CE  LYS   190     137.954 159.258 235.932  1.00  0.00           C
ATOM   3051  HE2 LYS   190     137.330 158.964 236.780  1.00  0.00           H
ATOM   3052  HE3 LYS   190     137.709 160.289 235.666  1.00  0.00           H
ATOM   3053  NZ  LYS   190     137.668 158.347 234.804  1.00  0.00           N
ATOM   3054  HZ1 LYS   190     136.699 158.389 234.485  1.00  0.00           H
ATOM   3055  HZ2 LYS   190     137.682 157.382 235.140  1.00  0.00           H
ATOM   3056  HZ3 LYS   190     138.326 158.430 234.034  1.00  0.00           H
ATOM   3057  C   LYS   190     143.915 159.331 234.394  1.00  0.00           C
ATOM   3058  O   LYS   190     144.344 160.448 234.127  1.00  0.00           O
ATOM   3059  N   ASP   191     144.738 158.312 234.665  1.00  0.00           N
ATOM   3060  H   ASP   191     144.358 157.395 234.845  1.00  0.00           H
ATOM   3061  CA  ASP   191     146.206 158.458 234.629  1.00  0.00           C
ATOM   3062  HA  ASP   191     146.481 159.308 235.255  1.00  0.00           H
ATOM   3063  CB  ASP   191     146.872 157.208 235.240  1.00  0.00           C
ATOM   3064  HB2 ASP   191     146.526 157.103 236.269  1.00  0.00           H
ATOM   3065  HB3 ASP   191     146.539 156.329 234.689  1.00  0.00           H
ATOM   3066  CG  ASP   191     148.412 157.221 235.247  1.00  0.00           C
ATOM   3067  OD1 ASP   191     149.030 158.227 234.836  1.00  0.00           O
ATOM   3068  OD2 ASP   191     148.997 156.187 235.624  1.00  0.00           O
ATOM   3069  C   ASP   191     146.706 158.755 233.200  1.00  0.00           C
ATOM   3070  O   ASP   191     146.331 158.070 232.247  1.00  0.00           O
ATOM   3071  N   GLN   192     147.592 159.746 233.050  1.00  0.00           N
ATOM   3072  H   GLN   192     147.966 160.153 233.895  1.00  0.00           H
ATOM   3073  CA  GLN   192     148.243 160.075 231.782  1.00  0.00           C
ATOM   3074  HA  GLN   192     147.460 160.356 231.078  1.00  0.00           H
ATOM   3075  CB  GLN   192     149.177 161.287 231.987  1.00  0.00           C
ATOM   3076  HB2 GLN   192     148.580 162.131 232.337  1.00  0.00           H
ATOM   3077  HB3 GLN   192     149.888 161.037 232.776  1.00  0.00           H
ATOM   3078  CG  GLN   192     149.989 161.744 230.756  1.00  0.00           C
ATOM   3079  HG2 GLN   192     150.668 162.537 231.070  1.00  0.00           H
ATOM   3080  HG3 GLN   192     150.600 160.919 230.388  1.00  0.00           H
ATOM   3081  CD  GLN   192     149.132 162.281 229.610  1.00  0.00           C
ATOM   3082  OE1 GLN   192     149.041 163.477 229.358  1.00  0.00           O
ATOM   3083  NE2 GLN   192     148.459 161.425 228.874  1.00  0.00           N
ATOM   3084 HE21 GLN   192     147.827 161.802 228.194  1.00  0.00           H
ATOM   3085 HE22 GLN   192     148.585 160.427 229.030  1.00  0.00           H
ATOM   3086  C   GLN   192     148.986 158.866 231.187  1.00  0.00           C
ATOM   3087  O   GLN   192     148.903 158.676 229.972  1.00  0.00           O
ATOM   3088  N   GLN   193     149.638 158.030 232.012  1.00  0.00           N
ATOM   3089  H   GLN   193     149.599 158.213 233.016  1.00  0.00           H
ATOM   3090  CA  GLN   193     150.290 156.791 231.557  1.00  0.00           C
ATOM   3091  HA  GLN   193     151.030 157.032 230.792  1.00  0.00           H
ATOM   3092  CB  GLN   193     150.981 156.047 232.712  1.00  0.00           C
ATOM   3093  HB2 GLN   193     150.217 155.685 233.398  1.00  0.00           H
ATOM   3094  HB3 GLN   193     151.481 155.170 232.297  1.00  0.00           H
ATOM   3095  CG  GLN   193     152.008 156.835 233.526  1.00  0.00           C
ATOM   3096  HG2 GLN   193     152.839 157.131 232.885  1.00  0.00           H
ATOM   3097  HG3 GLN   193     151.550 157.727 233.953  1.00  0.00           H
ATOM   3098  CD  GLN   193     152.526 155.957 234.658  1.00  0.00           C
ATOM   3099  OE1 GLN   193     153.591 155.361 234.577  1.00  0.00           O
ATOM   3100  NE2 GLN   193     151.763 155.754 235.707  1.00  0.00           N
ATOM   3101 HE21 GLN   193     152.110 155.154 236.426  1.00  0.00           H
ATOM   3102 HE22 GLN   193     150.794 156.097 235.716  1.00  0.00           H
ATOM   3103  C   GLN   193     149.271 155.820 230.958  1.00  0.00           C
ATOM   3104  O   GLN   193     149.445 155.335 229.843  1.00  0.00           O
ATOM   3105  N   PHE   194     148.183 155.566 231.691  1.00  0.00           N
ATOM   3106  H   PHE   194     148.105 156.016 232.591  1.00  0.00           H
ATOM   3107  CA  PHE   194     147.120 154.654 231.283  1.00  0.00           C
ATOM   3108  HA  PHE   194     147.553 153.669 231.100  1.00  0.00           H
ATOM   3109  CB  PHE   194     146.116 154.538 232.436  1.00  0.00           C
ATOM   3110  HB2 PHE   194     146.656 154.242 233.335  1.00  0.00           H
ATOM   3111  HB3 PHE   194     145.678 155.518 232.627  1.00  0.00           H
ATOM   3112  CG  PHE   194     144.999 153.541 232.212  1.00  0.00           C
ATOM   3113  CD1 PHE   194     145.266 152.160 232.265  1.00  0.00           C
ATOM   3114  HD1 PHE   194     146.273 151.809 232.445  1.00  0.00           H
ATOM   3115  CE1 PHE   194     144.224 151.233 232.090  1.00  0.00           C
ATOM   3116  HE1 PHE   194     144.433 150.173 232.132  1.00  0.00           H
ATOM   3117  CZ  PHE   194     142.918 151.687 231.838  1.00  0.00           C
ATOM   3118  HZ  PHE   194     142.121 150.977 231.681  1.00  0.00           H
ATOM   3119  CE2 PHE   194     142.649 153.065 231.779  1.00  0.00           C
ATOM   3120  HE2 PHE   194     141.647 153.412 231.578  1.00  0.00           H
ATOM   3121  CD2 PHE   194     143.688 153.991 231.974  1.00  0.00           C
ATOM   3122  HD2 PHE   194     143.477 155.049 231.941  1.00  0.00           H
ATOM   3123  C   PHE   194     146.468 155.124 229.978  1.00  0.00           C
ATOM   3124  O   PHE   194     146.353 154.348 229.036  1.00  0.00           O
ATOM   3125  N   LEU   195     146.148 156.416 229.865  1.00  0.00           N
ATOM   3126  H   LEU   195     146.273 157.009 230.682  1.00  0.00           H
ATOM   3127  CA  LEU   195     145.626 157.026 228.637  1.00  0.00           C
ATOM   3128  HA  LEU   195     144.747 156.466 228.314  1.00  0.00           H
ATOM   3129  CB  LEU   195     145.199 158.476 228.946  1.00  0.00           C
ATOM   3130  HB2 LEU   195     145.878 158.903 229.686  1.00  0.00           H
ATOM   3131  HB3 LEU   195     145.304 159.067 228.035  1.00  0.00           H
ATOM   3132  CG  LEU   195     143.738 158.637 229.421  1.00  0.00           C
ATOM   3133  HG  LEU   195     143.081 158.429 228.577  1.00  0.00           H
ATOM   3134  CD1 LEU   195     143.315 157.729 230.579  1.00  0.00           C
ATOM   3135 HD11 LEU   195     143.366 156.687 230.265  1.00  0.00           H
ATOM   3136 HD12 LEU   195     142.288 157.951 230.868  1.00  0.00           H
ATOM   3137 HD13 LEU   195     143.966 157.885 231.437  1.00  0.00           H
ATOM   3138  CD2 LEU   195     143.510 160.083 229.865  1.00  0.00           C
ATOM   3139 HD21 LEU   195     144.131 160.308 230.734  1.00  0.00           H
ATOM   3140 HD22 LEU   195     143.766 160.763 229.053  1.00  0.00           H
ATOM   3141 HD23 LEU   195     142.463 160.228 230.126  1.00  0.00           H
ATOM   3142  C   LEU   195     146.627 156.958 227.466  1.00  0.00           C
ATOM   3143  O   LEU   195     146.202 156.775 226.329  1.00  0.00           O
ATOM   3144  N   ASN   196     147.942 157.052 227.703  1.00  0.00           N
ATOM   3145  H   ASN   196     148.255 157.220 228.654  1.00  0.00           H
ATOM   3146  CA  ASN   196     148.956 156.822 226.663  1.00  0.00           C
ATOM   3147  HA  ASN   196     148.663 157.362 225.763  1.00  0.00           H
ATOM   3148  CB  ASN   196     150.326 157.355 227.131  1.00  0.00           C
ATOM   3149  HB2 ASN   196     150.600 156.886 228.075  1.00  0.00           H
ATOM   3150  HB3 ASN   196     151.074 157.076 226.389  1.00  0.00           H
ATOM   3151  CG  ASN   196     150.420 158.864 227.305  1.00  0.00           C
ATOM   3152  OD1 ASN   196     151.240 159.375 228.044  1.00  0.00           O
ATOM   3153  ND2 ASN   196     149.602 159.650 226.642  1.00  0.00           N
ATOM   3154 HD21 ASN   196     148.890 159.268 226.050  1.00  0.00           H
ATOM   3155 HD22 ASN   196     149.716 160.632 226.825  1.00  0.00           H
ATOM   3156  C   ASN   196     149.046 155.345 226.237  1.00  0.00           C
ATOM   3157  O   ASN   196     149.216 155.067 225.049  1.00  0.00           O
ATOM   3158  N   LEU   197     148.891 154.408 227.177  1.00  0.00           N
ATOM   3159  H   LEU   197     148.809 154.711 228.143  1.00  0.00           H
ATOM   3160  CA  LEU   197     148.832 152.968 226.909  1.00  0.00           C
ATOM   3161  HA  LEU   197     149.693 152.707 226.291  1.00  0.00           H
ATOM   3162  CB  LEU   197     148.963 152.225 228.258  1.00  0.00           C
ATOM   3163  HB2 LEU   197     149.747 152.732 228.824  1.00  0.00           H
ATOM   3164  HB3 LEU   197     148.041 152.318 228.832  1.00  0.00           H
ATOM   3165  CG  LEU   197     149.363 150.739 228.151  1.00  0.00           C
ATOM   3166  HG  LEU   197     150.056 150.613 227.320  1.00  0.00           H
ATOM   3167  CD1 LEU   197     150.076 150.292 229.430  1.00  0.00           C
ATOM   3168 HD11 LEU   197     150.971 150.895 229.582  1.00  0.00           H
ATOM   3169 HD12 LEU   197     150.371 149.246 229.341  1.00  0.00           H
ATOM   3170 HD13 LEU   197     149.415 150.408 230.290  1.00  0.00           H
ATOM   3171  CD2 LEU   197     148.168 149.804 227.962  1.00  0.00           C
ATOM   3172 HD21 LEU   197     147.502 149.869 228.821  1.00  0.00           H
ATOM   3173 HD22 LEU   197     147.620 150.059 227.058  1.00  0.00           H
ATOM   3174 HD23 LEU   197     148.516 148.775 227.870  1.00  0.00           H
ATOM   3175  C   LEU   197     147.570 152.608 226.103  1.00  0.00           C
ATOM   3176  O   LEU   197     147.666 151.848 225.140  1.00  0.00           O
ATOM   3177  N   MET   198     146.416 153.216 226.420  1.00  0.00           N
ATOM   3178  H   MET   198     146.391 153.791 227.256  1.00  0.00           H
ATOM   3179  CA  MET   198     145.195 153.093 225.610  1.00  0.00           C
ATOM   3180  HA  MET   198     144.945 152.036 225.512  1.00  0.00           H
ATOM   3181  CB  MET   198     143.983 153.824 226.218  1.00  0.00           C
ATOM   3182  HB2 MET   198     144.188 154.894 226.261  1.00  0.00           H
ATOM   3183  HB3 MET   198     143.144 153.683 225.535  1.00  0.00           H
ATOM   3184  CG  MET   198     143.511 153.381 227.604  1.00  0.00           C
ATOM   3185  HG2 MET   198     144.139 153.839 228.362  1.00  0.00           H
ATOM   3186  HG3 MET   198     142.517 153.801 227.745  1.00  0.00           H
ATOM   3187  SD  MET   198     143.410 151.598 227.922  1.00  0.00           S
ATOM   3188  CE  MET   198     144.934 151.398 228.877  1.00  0.00           C
ATOM   3189  HE1 MET   198     145.018 152.207 229.600  1.00  0.00           H
ATOM   3190  HE2 MET   198     144.914 150.453 229.416  1.00  0.00           H
ATOM   3191  HE3 MET   198     145.793 151.420 228.212  1.00  0.00           H
ATOM   3192  C   MET   198     145.419 153.641 224.200  1.00  0.00           C
ATOM   3193  O   MET   198     145.176 152.932 223.233  1.00  0.00           O
ATOM   3194  N   GLU   199     145.940 154.864 224.077  1.00  0.00           N
ATOM   3195  H   GLU   199     146.088 155.406 224.922  1.00  0.00           H
ATOM   3196  CA  GLU   199     146.183 155.535 222.794  1.00  0.00           C
ATOM   3197  HA  GLU   199     145.238 155.667 222.277  1.00  0.00           H
ATOM   3198  CB  GLU   199     146.735 156.941 223.093  1.00  0.00           C
ATOM   3199  HB2 GLU   199     145.905 157.563 223.433  1.00  0.00           H
ATOM   3200  HB3 GLU   199     147.444 156.869 223.917  1.00  0.00           H
ATOM   3201  CG  GLU   199     147.464 157.679 221.964  1.00  0.00           C
ATOM   3202  HG2 GLU   199     147.618 158.714 222.276  1.00  0.00           H
ATOM   3203  HG3 GLU   199     148.454 157.232 221.867  1.00  0.00           H
ATOM   3204  CD  GLU   199     146.782 157.668 220.590  1.00  0.00           C
ATOM   3205  OE1 GLU   199     147.539 157.865 219.610  1.00  0.00           O
ATOM   3206  OE2 GLU   199     145.538 157.541 220.508  1.00  0.00           O
ATOM   3207  C   GLU   199     147.092 154.710 221.868  1.00  0.00           C
ATOM   3208  O   GLU   199     146.761 154.447 220.709  1.00  0.00           O
ATOM   3209  N   LYS   200     148.239 154.245 222.375  1.00  0.00           N
ATOM   3210  H   LYS   200     148.462 154.453 223.347  1.00  0.00           H
ATOM   3211  CA  LYS   200     149.206 153.499 221.556  1.00  0.00           C
ATOM   3212  HA  LYS   200     149.118 153.866 220.538  1.00  0.00           H
ATOM   3213  CB  LYS   200     150.642 153.796 222.031  1.00  0.00           C
ATOM   3214  HB2 LYS   200     150.758 153.443 223.056  1.00  0.00           H
ATOM   3215  HB3 LYS   200     151.344 153.248 221.401  1.00  0.00           H
ATOM   3216  CG  LYS   200     150.996 155.306 221.968  1.00  0.00           C
ATOM   3217  HG2 LYS   200     150.427 155.845 222.725  1.00  0.00           H
ATOM   3218  HG3 LYS   200     152.056 155.431 222.191  1.00  0.00           H
ATOM   3219  CD  LYS   200     150.698 155.921 220.589  1.00  0.00           C
ATOM   3220  HD2 LYS   200     151.297 155.394 219.848  1.00  0.00           H
ATOM   3221  HD3 LYS   200     149.644 155.781 220.357  1.00  0.00           H
ATOM   3222  CE  LYS   200     150.940 157.423 220.438  1.00  0.00           C
ATOM   3223  HE2 LYS   200     150.551 157.941 221.319  1.00  0.00           H
ATOM   3224  HE3 LYS   200     152.015 157.605 220.363  1.00  0.00           H
ATOM   3225  NZ  LYS   200     150.232 157.900 219.222  1.00  0.00           N
ATOM   3226  HZ1 LYS   200     150.485 158.835 218.949  1.00  0.00           H
ATOM   3227  HZ2 LYS   200     149.217 157.885 219.368  1.00  0.00           H
ATOM   3228  HZ3 LYS   200     150.371 157.244 218.451  1.00  0.00           H
ATOM   3229  C   LYS   200     148.846 152.030 221.337  1.00  0.00           C
ATOM   3230  O   LYS   200     149.413 151.423 220.420  1.00  0.00           O
ATOM   3231  N   LEU   201     147.824 151.521 222.029  1.00  0.00           N
ATOM   3232  H   LEU   201     147.466 152.065 222.806  1.00  0.00           H
ATOM   3233  CA  LEU   201     147.018 150.382 221.585  1.00  0.00           C
ATOM   3234  HA  LEU   201     147.690 149.643 221.160  1.00  0.00           H
ATOM   3235  CB  LEU   201     146.355 149.731 222.819  1.00  0.00           C
ATOM   3236  HB2 LEU   201     147.139 149.551 223.556  1.00  0.00           H
ATOM   3237  HB3 LEU   201     145.662 150.438 223.273  1.00  0.00           H
ATOM   3238  CG  LEU   201     145.610 148.394 222.625  1.00  0.00           C
ATOM   3239  HG  LEU   201     145.364 148.032 223.622  1.00  0.00           H
ATOM   3240  CD1 LEU   201     144.294 148.513 221.854  1.00  0.00           C
ATOM   3241 HD11 LEU   201     143.693 149.323 222.269  1.00  0.00           H
ATOM   3242 HD12 LEU   201     143.735 147.583 221.950  1.00  0.00           H
ATOM   3243 HD13 LEU   201     144.475 148.688 220.797  1.00  0.00           H
ATOM   3244  CD2 LEU   201     146.477 147.330 221.949  1.00  0.00           C
ATOM   3245 HD21 LEU   201     146.663 147.594 220.907  1.00  0.00           H
ATOM   3246 HD22 LEU   201     147.422 147.233 222.483  1.00  0.00           H
ATOM   3247 HD23 LEU   201     145.958 146.372 221.979  1.00  0.00           H
ATOM   3248  C   LEU   201     146.024 150.791 220.474  1.00  0.00           C
ATOM   3249  O   LEU   201     146.083 150.236 219.374  1.00  0.00           O
ATOM   3250  N   ASN   202     145.135 151.762 220.726  1.00  0.00           N
ATOM   3251  H   ASN   202     145.182 152.226 221.628  1.00  0.00           H
ATOM   3252  CA  ASN   202     143.955 152.025 219.896  1.00  0.00           C
ATOM   3253  HA  ASN   202     143.439 151.071 219.800  1.00  0.00           H
ATOM   3254  CB  ASN   202     142.933 152.950 220.603  1.00  0.00           C
ATOM   3255  HB2 ASN   202     142.037 152.989 219.986  1.00  0.00           H
ATOM   3256  HB3 ASN   202     142.652 152.480 221.546  1.00  0.00           H
ATOM   3257  CG  ASN   202     143.302 154.398 220.925  1.00  0.00           C
ATOM   3258  OD1 ASN   202     142.982 154.887 221.993  1.00  0.00           O
ATOM   3259  ND2 ASN   202     143.923 155.144 220.037  1.00  0.00           N
ATOM   3260 HD21 ASN   202     144.237 154.770 219.167  1.00  0.00           H
ATOM   3261 HD22 ASN   202     144.265 156.059 220.340  1.00  0.00           H
ATOM   3262  C   ASN   202     144.286 152.447 218.458  1.00  0.00           C
ATOM   3263  O   ASN   202     143.607 152.011 217.527  1.00  0.00           O
ATOM   3264  N   GLU   203     145.347 153.232 218.231  1.00  0.00           N
ATOM   3265  H   GLU   203     145.893 153.581 219.019  1.00  0.00           H
ATOM   3266  CA  GLU   203     145.742 153.557 216.853  1.00  0.00           C
ATOM   3267  HA  GLU   203     144.843 153.847 216.308  1.00  0.00           H
ATOM   3268  CB  GLU   203     146.686 154.773 216.800  1.00  0.00           C
ATOM   3269  HB2 GLU   203     146.778 155.047 215.748  1.00  0.00           H
ATOM   3270  HB3 GLU   203     146.226 155.611 217.324  1.00  0.00           H
ATOM   3271  CG  GLU   203     148.091 154.531 217.373  1.00  0.00           C
ATOM   3272  HG2 GLU   203     148.035 154.469 218.459  1.00  0.00           H
ATOM   3273  HG3 GLU   203     148.469 153.578 217.008  1.00  0.00           H
ATOM   3274  CD  GLU   203     149.124 155.587 216.966  1.00  0.00           C
ATOM   3275  OE1 GLU   203     149.039 156.197 215.884  1.00  0.00           O
ATOM   3276  OE2 GLU   203     150.195 155.662 217.611  1.00  0.00           O
ATOM   3277  C   GLU   203     146.308 152.330 216.111  1.00  0.00           C
ATOM   3278  O   GLU   203     146.075 152.179 214.913  1.00  0.00           O
ATOM   3279  N   ASN   204     147.007 151.415 216.798  1.00  0.00           N
ATOM   3280  H   ASN   204     147.054 151.487 217.806  1.00  0.00           H
ATOM   3281  CA  ASN   204     147.636 150.274 216.131  1.00  0.00           C
ATOM   3282  HA  ASN   204     148.014 150.645 215.177  1.00  0.00           H
ATOM   3283  CB  ASN   204     148.885 149.799 216.906  1.00  0.00           C
ATOM   3284  HB2 ASN   204     149.601 149.415 216.180  1.00  0.00           H
ATOM   3285  HB3 ASN   204     149.354 150.649 217.399  1.00  0.00           H
ATOM   3286  CG  ASN   204     148.671 148.678 217.910  1.00  0.00           C
ATOM   3287  OD1 ASN   204     148.268 147.583 217.574  1.00  0.00           O
ATOM   3288  ND2 ASN   204     149.004 148.875 219.160  1.00  0.00           N
ATOM   3289 HD21 ASN   204     149.256 149.795 219.502  1.00  0.00           H
ATOM   3290 HD22 ASN   204     148.843 148.101 219.778  1.00  0.00           H
ATOM   3291  C   ASN   204     146.607 149.193 215.749  1.00  0.00           C
ATOM   3292  O   ASN   204     146.663 148.697 214.625  1.00  0.00           O
ATOM   3293  N   ILE   205     145.598 148.921 216.590  1.00  0.00           N
ATOM   3294  H   ILE   205     145.614 149.337 217.516  1.00  0.00           H
ATOM   3295  CA  ILE   205     144.492 148.010 216.232  1.00  0.00           C
ATOM   3296  HA  ILE   205     144.957 147.120 215.817  1.00  0.00           H
ATOM   3297  CB  ILE   205     143.709 147.549 217.485  1.00  0.00           C
ATOM   3298  HB  ILE   205     144.431 147.139 218.195  1.00  0.00           H
ATOM   3299  CG2 ILE   205     142.991 148.716 218.176  1.00  0.00           C
ATOM   3300 HG21 ILE   205     143.712 149.490 218.413  1.00  0.00           H
ATOM   3301 HG22 ILE   205     142.536 148.371 219.106  1.00  0.00           H
ATOM   3302 HG23 ILE   205     142.209 149.129 217.539  1.00  0.00           H
ATOM   3303  CG1 ILE   205     142.659 146.453 217.197  1.00  0.00           C
ATOM   3304 HG12 ILE   205     142.168 146.190 218.136  1.00  0.00           H
ATOM   3305 HG13 ILE   205     141.893 146.835 216.521  1.00  0.00           H
ATOM   3306  CD1 ILE   205     143.246 145.165 216.607  1.00  0.00           C
ATOM   3307 HD11 ILE   205     143.615 145.341 215.597  1.00  0.00           H
ATOM   3308 HD12 ILE   205     142.467 144.404 216.561  1.00  0.00           H
ATOM   3309 HD13 ILE   205     144.059 144.802 217.237  1.00  0.00           H
ATOM   3310  C   ILE   205     143.586 148.588 215.128  1.00  0.00           C
ATOM   3311  O   ILE   205     143.105 147.839 214.270  1.00  0.00           O
ATOM   3312  N   LYS   206     143.416 149.919 215.065  1.00  0.00           N
ATOM   3313  H   LYS   206     143.785 150.483 215.825  1.00  0.00           H
ATOM   3314  CA  LYS   206     142.737 150.604 213.947  1.00  0.00           C
ATOM   3315  HA  LYS   206     141.744 150.165 213.831  1.00  0.00           H
ATOM   3316  CB  LYS   206     142.569 152.098 214.295  1.00  0.00           C
ATOM   3317  HB2 LYS   206     142.057 152.150 215.258  1.00  0.00           H
ATOM   3318  HB3 LYS   206     143.545 152.566 214.423  1.00  0.00           H
ATOM   3319  CG  LYS   206     141.731 152.920 213.293  1.00  0.00           C
ATOM   3320  HG2 LYS   206     140.946 152.290 212.874  1.00  0.00           H
ATOM   3321  HG3 LYS   206     141.252 153.723 213.852  1.00  0.00           H
ATOM   3322  CD  LYS   206     142.549 153.561 212.155  1.00  0.00           C
ATOM   3323  HD2 LYS   206     143.313 154.217 212.575  1.00  0.00           H
ATOM   3324  HD3 LYS   206     143.052 152.780 211.588  1.00  0.00           H
ATOM   3325  CE  LYS   206     141.673 154.348 211.169  1.00  0.00           C
ATOM   3326  HE2 LYS   206     142.262 154.548 210.268  1.00  0.00           H
ATOM   3327  HE3 LYS   206     140.826 153.722 210.872  1.00  0.00           H
ATOM   3328  NZ  LYS   206     141.184 155.635 211.723  1.00  0.00           N
ATOM   3329  HZ1 LYS   206     140.645 156.140 211.018  1.00  0.00           H
ATOM   3330  HZ2 LYS   206     141.942 156.238 212.000  1.00  0.00           H
ATOM   3331  HZ3 LYS   206     140.578 155.511 212.535  1.00  0.00           H
ATOM   3332  C   LYS   206     143.466 150.375 212.619  1.00  0.00           C
ATOM   3333  O   LYS   206     142.813 150.170 211.596  1.00  0.00           O
ATOM   3334  N   ILE   207     144.803 150.376 212.625  1.00  0.00           N
ATOM   3335  H   ILE   207     145.275 150.595 213.494  1.00  0.00           H
ATOM   3336  CA  ILE   207     145.611 150.019 211.449  1.00  0.00           C
ATOM   3337  HA  ILE   207     145.163 150.496 210.576  1.00  0.00           H
ATOM   3338  CB  ILE   207     147.057 150.569 211.580  1.00  0.00           C
ATOM   3339  HB  ILE   207     147.373 150.540 212.625  1.00  0.00           H
ATOM   3340  CG2 ILE   207     148.066 149.742 210.764  1.00  0.00           C
ATOM   3341 HG21 ILE   207     148.162 148.742 211.185  1.00  0.00           H
ATOM   3342 HG22 ILE   207     149.054 150.201 210.784  1.00  0.00           H
ATOM   3343 HG23 ILE   207     147.728 149.667 209.731  1.00  0.00           H
ATOM   3344  CG1 ILE   207     147.158 152.023 211.055  1.00  0.00           C
ATOM   3345 HG12 ILE   207     148.210 152.287 210.940  1.00  0.00           H
ATOM   3346 HG13 ILE   207     146.693 152.074 210.070  1.00  0.00           H
ATOM   3347  CD1 ILE   207     146.537 153.110 211.934  1.00  0.00           C
ATOM   3348 HD11 ILE   207     145.489 152.898 212.130  1.00  0.00           H
ATOM   3349 HD12 ILE   207     146.610 154.069 211.422  1.00  0.00           H
ATOM   3350 HD13 ILE   207     147.087 153.179 212.870  1.00  0.00           H
ATOM   3351  C   ILE   207     145.534 148.508 211.159  1.00  0.00           C
ATOM   3352  O   ILE   207     145.206 148.143 210.034  1.00  0.00           O
ATOM   3353  N   LEU   208     145.775 147.632 212.143  1.00  0.00           N
ATOM   3354  H   LEU   208     146.037 148.001 213.052  1.00  0.00           H
ATOM   3355  CA  LEU   208     145.797 146.168 211.967  1.00  0.00           C
ATOM   3356  HA  LEU   208     146.579 145.900 211.259  1.00  0.00           H
ATOM   3357  CB  LEU   208     146.081 145.493 213.323  1.00  0.00           C
ATOM   3358  HB2 LEU   208     145.465 145.978 214.076  1.00  0.00           H
ATOM   3359  HB3 LEU   208     145.763 144.450 213.277  1.00  0.00           H
ATOM   3360  CG  LEU   208     147.552 145.525 213.769  1.00  0.00           C
ATOM   3361  HG  LEU   208     147.975 146.516 213.607  1.00  0.00           H
ATOM   3362  CD1 LEU   208     147.651 145.183 215.255  1.00  0.00           C
ATOM   3363 HD11 LEU   208     147.091 145.916 215.837  1.00  0.00           H
ATOM   3364 HD12 LEU   208     148.691 145.222 215.576  1.00  0.00           H
ATOM   3365 HD13 LEU   208     147.246 144.189 215.444  1.00  0.00           H
ATOM   3366  CD2 LEU   208     148.372 144.491 212.995  1.00  0.00           C
ATOM   3367 HD21 LEU   208     147.926 143.501 213.099  1.00  0.00           H
ATOM   3368 HD22 LEU   208     148.407 144.759 211.943  1.00  0.00           H
ATOM   3369 HD23 LEU   208     149.388 144.456 213.385  1.00  0.00           H
ATOM   3370  C   LEU   208     144.486 145.604 211.401  1.00  0.00           C
ATOM   3371  O   LEU   208     144.512 144.727 210.542  1.00  0.00           O
ATOM   3372  N   SER   209     143.346 146.106 211.881  1.00  0.00           N
ATOM   3373  H   SER   209     143.404 146.808 212.609  1.00  0.00           H
ATOM   3374  CA  SER   209     142.018 145.670 211.433  1.00  0.00           C
ATOM   3375  HA  SER   209     142.092 144.619 211.159  1.00  0.00           H
ATOM   3376  CB  SER   209     141.029 145.746 212.598  1.00  0.00           C
ATOM   3377  HB2 SER   209     140.100 145.268 212.297  1.00  0.00           H
ATOM   3378  HB3 SER   209     141.429 145.194 213.450  1.00  0.00           H
ATOM   3379  OG  SER   209     140.771 147.082 212.988  1.00  0.00           O
ATOM   3380  HG  SER   209     141.538 147.393 213.503  1.00  0.00           H
ATOM   3381  C   SER   209     141.511 146.398 210.174  1.00  0.00           C
ATOM   3382  O   SER   209     140.428 146.085 209.674  1.00  0.00           O
ATOM   3383  N   SER   210     142.291 147.337 209.622  1.00  0.00           N
ATOM   3384  H   SER   210     143.204 147.495 210.031  1.00  0.00           H
ATOM   3385  CA  SER   210     142.041 147.930 208.302  1.00  0.00           C
ATOM   3386  HA  SER   210     140.966 147.999 208.164  1.00  0.00           H
ATOM   3387  CB  SER   210     142.589 149.358 208.225  1.00  0.00           C
ATOM   3388  HB2 SER   210     143.639 149.379 208.515  1.00  0.00           H
ATOM   3389  HB3 SER   210     142.507 149.712 207.196  1.00  0.00           H
ATOM   3390  OG  SER   210     141.838 150.222 209.053  1.00  0.00           O
ATOM   3391  HG  SER   210     142.128 150.081 209.977  1.00  0.00           H
ATOM   3392  C   SER   210     142.670 147.074 207.184  1.00  0.00           C
ATOM   3393  O   SER   210     143.841 146.707 207.297  1.00  0.00           O
ATOM   3394  N   PRO   211     141.974 146.820 206.053  1.00  0.00           N
ATOM   3395  CD  PRO   211     140.551 147.079 205.844  1.00  0.00           C
ATOM   3396  HD2 PRO   211     140.414 148.105 205.502  1.00  0.00           H
ATOM   3397  HD3 PRO   211     139.967 146.895 206.746  1.00  0.00           H
ATOM   3398  CG  PRO   211     140.094 146.102 204.761  1.00  0.00           C
ATOM   3399  HG2 PRO   211     139.270 146.505 204.171  1.00  0.00           H
ATOM   3400  HG3 PRO   211     139.812 145.151 205.217  1.00  0.00           H
ATOM   3401  CB  PRO   211     141.356 145.917 203.926  1.00  0.00           C
ATOM   3402  HB2 PRO   211     141.478 146.763 203.247  1.00  0.00           H
ATOM   3403  HB3 PRO   211     141.339 144.976 203.374  1.00  0.00           H
ATOM   3404  CA  PRO   211     142.458 145.928 204.988  1.00  0.00           C
ATOM   3405  HA  PRO   211     142.514 144.928 205.417  1.00  0.00           H
ATOM   3406  C   PRO   211     143.830 146.234 204.354  1.00  0.00           C
ATOM   3407  O   PRO   211     144.378 145.360 203.689  1.00  0.00           O
ATOM   3408  N   TRP   212     144.432 147.406 204.595  1.00  0.00           N
ATOM   3409  H   TRP   212     143.958 148.057 205.195  1.00  0.00           H
ATOM   3410  CA  TRP   212     145.786 147.753 204.127  1.00  0.00           C
ATOM   3411  HA  TRP   212     145.794 147.760 203.037  1.00  0.00           H
ATOM   3412  CB  TRP   212     146.147 149.155 204.632  1.00  0.00           C
ATOM   3413  HB2 TRP   212     145.330 149.832 204.392  1.00  0.00           H
ATOM   3414  HB3 TRP   212     146.233 149.128 205.719  1.00  0.00           H
ATOM   3415  CG  TRP   212     147.407 149.740 204.062  1.00  0.00           C
ATOM   3416  CD1 TRP   212     148.583 149.886 204.715  1.00  0.00           C
ATOM   3417  HD1 TRP   212     148.768 149.572 205.736  1.00  0.00           H
ATOM   3418  NE1 TRP   212     149.501 150.513 203.891  1.00  0.00           N
ATOM   3419  HE1 TRP   212     150.443 150.772 204.178  1.00  0.00           H
ATOM   3420  CE2 TRP   212     148.965 150.782 202.651  1.00  0.00           C
ATOM   3421  CZ2 TRP   212     149.473 151.406 201.503  1.00  0.00           C
ATOM   3422  HZ2 TRP   212     150.478 151.798 201.493  1.00  0.00           H
ATOM   3423  CH2 TRP   212     148.668 151.485 200.354  1.00  0.00           C
ATOM   3424  HH2 TRP   212     149.058 151.938 199.452  1.00  0.00           H
ATOM   3425  CZ3 TRP   212     147.370 150.941 200.369  1.00  0.00           C
ATOM   3426  HZ3 TRP   212     146.766 150.982 199.474  1.00  0.00           H
ATOM   3427  CE3 TRP   212     146.866 150.335 201.536  1.00  0.00           C
ATOM   3428  HE3 TRP   212     145.881 149.902 201.533  1.00  0.00           H
ATOM   3429  CD2 TRP   212     147.641 150.256 202.714  1.00  0.00           C
ATOM   3430  C   TRP   212     146.861 146.758 204.589  1.00  0.00           C
ATOM   3431  O   TRP   212     147.787 146.456 203.844  1.00  0.00           O
ATOM   3432  N   ILE   213     146.711 146.222 205.805  1.00  0.00           N
ATOM   3433  H   ILE   213     145.916 146.514 206.362  1.00  0.00           H
ATOM   3434  CA  ILE   213     147.598 145.191 206.367  1.00  0.00           C
ATOM   3435  HA  ILE   213     148.616 145.384 206.031  1.00  0.00           H
ATOM   3436  CB  ILE   213     147.568 145.293 207.916  1.00  0.00           C
ATOM   3437  HB  ILE   213     146.573 144.991 208.250  1.00  0.00           H
ATOM   3438  CG2 ILE   213     148.580 144.334 208.567  1.00  0.00           C
ATOM   3439 HG21 ILE   213     148.255 143.304 208.431  1.00  0.00           H
ATOM   3440 HG22 ILE   213     148.647 144.525 209.636  1.00  0.00           H
ATOM   3441 HG23 ILE   213     149.565 144.458 208.113  1.00  0.00           H
ATOM   3442  CG1 ILE   213     147.798 146.731 208.450  1.00  0.00           C
ATOM   3443 HG12 ILE   213     146.985 147.375 208.115  1.00  0.00           H
ATOM   3444 HG13 ILE   213     147.750 146.711 209.538  1.00  0.00           H
ATOM   3445  CD1 ILE   213     149.127 147.383 208.051  1.00  0.00           C
ATOM   3446 HD11 ILE   213     149.960 146.805 208.447  1.00  0.00           H
ATOM   3447 HD12 ILE   213     149.181 148.390 208.460  1.00  0.00           H
ATOM   3448 HD13 ILE   213     149.199 147.451 206.967  1.00  0.00           H
ATOM   3449  C   ILE   213     147.224 143.783 205.855  1.00  0.00           C
ATOM   3450  O   ILE   213     148.010 142.841 205.912  1.00  0.00           O
ATOM   3451  N   GLN   214     146.004 143.614 205.339  1.00  0.00           N
ATOM   3452  H   GLN   214     145.434 144.438 205.204  1.00  0.00           H
ATOM   3453  CA  GLN   214     145.405 142.317 205.027  1.00  0.00           C
ATOM   3454  HA  GLN   214     145.723 141.607 205.792  1.00  0.00           H
ATOM   3455  CB  GLN   214     143.881 142.484 205.137  1.00  0.00           C
ATOM   3456  HB2 GLN   214     143.672 143.039 206.054  1.00  0.00           H
ATOM   3457  HB3 GLN   214     143.521 143.067 204.291  1.00  0.00           H
ATOM   3458  CG  GLN   214     143.073 141.183 205.198  1.00  0.00           C
ATOM   3459  HG2 GLN   214     143.097 140.681 204.231  1.00  0.00           H
ATOM   3460  HG3 GLN   214     143.515 140.522 205.942  1.00  0.00           H
ATOM   3461  CD  GLN   214     141.617 141.465 205.579  1.00  0.00           C
ATOM   3462  OE1 GLN   214     141.055 142.502 205.261  1.00  0.00           O
ATOM   3463  NE2 GLN   214     140.969 140.566 206.282  1.00  0.00           N
ATOM   3464 HE21 GLN   214     140.039 140.821 206.610  1.00  0.00           H
ATOM   3465 HE22 GLN   214     141.437 139.780 206.689  1.00  0.00           H
ATOM   3466  C   GLN   214     145.838 141.752 203.663  1.00  0.00           C
ATOM   3467  O   GLN   214     146.034 140.540 203.549  1.00  0.00           O
ATOM   3468  N   ILE   215     146.024 142.589 202.631  1.00  0.00           N
ATOM   3469  H   ILE   215     145.844 143.576 202.777  1.00  0.00           H
ATOM   3470  CA  ILE   215     146.289 142.099 201.258  1.00  0.00           C
ATOM   3471  HA  ILE   215     145.509 141.373 201.027  1.00  0.00           H
ATOM   3472  CB  ILE   215     146.227 143.215 200.180  1.00  0.00           C
ATOM   3473  HB  ILE   215     147.223 143.654 200.080  1.00  0.00           H
ATOM   3474  CG2 ILE   215     145.878 142.583 198.820  1.00  0.00           C
ATOM   3475 HG21 ILE   215     144.863 142.183 198.840  1.00  0.00           H
ATOM   3476 HG22 ILE   215     146.571 141.779 198.582  1.00  0.00           H
ATOM   3477 HG23 ILE   215     145.950 143.335 198.033  1.00  0.00           H
ATOM   3478  CG1 ILE   215     145.223 144.355 200.461  1.00  0.00           C
ATOM   3479 HG12 ILE   215     144.754 144.686 199.535  1.00  0.00           H
ATOM   3480 HG13 ILE   215     144.424 144.016 201.123  1.00  0.00           H
ATOM   3481  CD1 ILE   215     145.938 145.565 201.068  1.00  0.00           C
ATOM   3482 HD11 ILE   215     146.480 145.265 201.962  1.00  0.00           H
ATOM   3483 HD12 ILE   215     145.204 146.325 201.331  1.00  0.00           H
ATOM   3484 HD13 ILE   215     146.643 145.983 200.348  1.00  0.00           H
ATOM   3485  C   ILE   215     147.635 141.362 201.146  1.00  0.00           C
ATOM   3486  O   ILE   215     147.736 140.358 200.436  1.00  0.00           O
ATOM   3487  N   CYS   216     148.659 141.820 201.875  1.00  0.00           N
ATOM   3488  H   CYS   216     148.515 142.654 202.429  1.00  0.00           H
ATOM   3489  CA  CYS   216     150.031 141.301 201.803  1.00  0.00           C
ATOM   3490  HA  CYS   216     150.318 141.282 200.751  1.00  0.00           H
ATOM   3491  CB  CYS   216     150.976 142.283 202.510  1.00  0.00           C
ATOM   3492  HB2 CYS   216     150.645 142.456 203.535  1.00  0.00           H
ATOM   3493  HB3 CYS   216     151.990 141.876 202.540  1.00  0.00           H
ATOM   3494  SG  CYS   216     150.982 143.858 201.600  1.00  0.00           S
ATOM   3495  HG  CYS   216     151.652 143.429 200.521  1.00  0.00           H
ATOM   3496  C   CYS   216     150.205 139.852 202.302  1.00  0.00           C
ATOM   3497  O   CYS   216     151.251 139.256 202.054  1.00  0.00           O
ATOM   3498  N   ASN   217     149.172 139.230 202.889  1.00  0.00           N
ATOM   3499  H   ASN   217     148.340 139.768 203.083  1.00  0.00           H
ATOM   3500  CA  ASN   217     149.117 137.767 203.050  1.00  0.00           C
ATOM   3501  HA  ASN   217     149.926 137.432 203.706  1.00  0.00           H
ATOM   3502  CB  ASN   217     147.762 137.372 203.668  1.00  0.00           C
ATOM   3503  HB2 ASN   217     146.945 137.848 203.127  1.00  0.00           H
ATOM   3504  HB3 ASN   217     147.639 136.292 203.574  1.00  0.00           H
ATOM   3505  CG  ASN   217     147.657 137.695 205.144  1.00  0.00           C
ATOM   3506  OD1 ASN   217     148.091 136.944 205.994  1.00  0.00           O
ATOM   3507  ND2 ASN   217     147.062 138.803 205.511  1.00  0.00           N
ATOM   3508 HD21 ASN   217     146.667 139.424 204.815  1.00  0.00           H
ATOM   3509 HD22 ASN   217     147.022 138.990 206.495  1.00  0.00           H
ATOM   3510  C   ASN   217     149.291 137.045 201.699  1.00  0.00           C
ATOM   3511  O   ASN   217     149.989 136.036 201.613  1.00  0.00           O
ATOM   3512  N   ASN   218     148.684 137.593 200.638  1.00  0.00           N
ATOM   3513  H   ASN   218     148.194 138.468 200.781  1.00  0.00           H
ATOM   3514  CA  ASN   218     148.635 136.993 199.305  1.00  0.00           C
ATOM   3515  HA  ASN   218     149.143 136.031 199.324  1.00  0.00           H
ATOM   3516  CB  ASN   218     147.168 136.721 198.939  1.00  0.00           C
ATOM   3517  HB2 ASN   218     146.616 137.659 198.906  1.00  0.00           H
ATOM   3518  HB3 ASN   218     147.132 136.263 197.952  1.00  0.00           H
ATOM   3519  CG  ASN   218     146.500 135.768 199.917  1.00  0.00           C
ATOM   3520  OD1 ASN   218     147.035 134.741 200.285  1.00  0.00           O
ATOM   3521  ND2 ASN   218     145.312 136.074 200.385  1.00  0.00           N
ATOM   3522 HD21 ASN   218     144.822 136.890 200.072  1.00  0.00           H
ATOM   3523 HD22 ASN   218     144.901 135.392 200.999  1.00  0.00           H
ATOM   3524  C   ASN   218     149.363 137.839 198.252  1.00  0.00           C
ATOM   3525  O   ASN   218     150.259 137.338 197.578  1.00  0.00           O
ATOM   3526  N   PHE   219     149.044 139.134 198.145  1.00  0.00           N
ATOM   3527  H   PHE   219     148.359 139.516 198.786  1.00  0.00           H
ATOM   3528  CA  PHE   219     149.748 140.073 197.260  1.00  0.00           C
ATOM   3529  HA  PHE   219     150.132 139.505 196.410  1.00  0.00           H
ATOM   3530  CB  PHE   219     148.760 141.105 196.685  1.00  0.00           C
ATOM   3531  HB2 PHE   219     147.772 140.647 196.617  1.00  0.00           H
ATOM   3532  HB3 PHE   219     148.672 141.956 197.362  1.00  0.00           H
ATOM   3533  CG  PHE   219     149.133 141.591 195.294  1.00  0.00           C
ATOM   3534  CD1 PHE   219     148.611 140.937 194.160  1.00  0.00           C
ATOM   3535  HD1 PHE   219     147.946 140.092 194.278  1.00  0.00           H
ATOM   3536  CE1 PHE   219     148.954 141.373 192.867  1.00  0.00           C
ATOM   3537  HE1 PHE   219     148.556 140.864 191.999  1.00  0.00           H
ATOM   3538  CZ  PHE   219     149.821 142.467 192.702  1.00  0.00           C
ATOM   3539  HZ  PHE   219     150.084 142.806 191.710  1.00  0.00           H
ATOM   3540  CE2 PHE   219     150.351 143.117 193.830  1.00  0.00           C
ATOM   3541  HE2 PHE   219     151.018 143.958 193.700  1.00  0.00           H
ATOM   3542  CD2 PHE   219     150.011 142.678 195.123  1.00  0.00           C
ATOM   3543  HD2 PHE   219     150.426 143.174 195.987  1.00  0.00           H
ATOM   3544  C   PHE   219     150.978 140.667 197.976  1.00  0.00           C
ATOM   3545  O   PHE   219     151.128 141.877 198.129  1.00  0.00           O
ATOM   3546  N   SER   220     151.836 139.786 198.495  1.00  0.00           N
ATOM   3547  H   SER   220     151.641 138.801 198.349  1.00  0.00           H
ATOM   3548  CA  SER   220     152.958 140.110 199.389  1.00  0.00           C
ATOM   3549  HA  SER   220     152.545 140.569 200.286  1.00  0.00           H
ATOM   3550  CB  SER   220     153.656 138.812 199.823  1.00  0.00           C
ATOM   3551  HB2 SER   220     154.198 138.390 198.975  1.00  0.00           H
ATOM   3552  HB3 SER   220     154.369 139.035 200.618  1.00  0.00           H
ATOM   3553  OG  SER   220     152.714 137.856 200.288  1.00  0.00           O
ATOM   3554  HG  SER   220     152.254 138.267 201.051  1.00  0.00           H
ATOM   3555  C   SER   220     154.023 141.098 198.866  1.00  0.00           C
ATOM   3556  O   SER   220     154.542 141.840 199.699  1.00  0.00           O
ATOM   3557  N   PRO   221     154.382 141.164 197.560  1.00  0.00           N
ATOM   3558  CD  PRO   221     153.903 140.325 196.465  1.00  0.00           C
ATOM   3559  HD2 PRO   221     152.996 140.762 196.044  1.00  0.00           H
ATOM   3560  HD3 PRO   221     153.720 139.300 196.786  1.00  0.00           H
ATOM   3561  CG  PRO   221     155.002 140.328 195.410  1.00  0.00           C
ATOM   3562  HG2 PRO   221     154.598 140.199 194.406  1.00  0.00           H
ATOM   3563  HG3 PRO   221     155.730 139.552 195.643  1.00  0.00           H
ATOM   3564  CB  PRO   221     155.626 141.705 195.599  1.00  0.00           C
ATOM   3565  HB2 PRO   221     155.005 142.451 195.101  1.00  0.00           H
ATOM   3566  HB3 PRO   221     156.647 141.752 195.229  1.00  0.00           H
ATOM   3567  CA  PRO   221     155.577 141.894 197.116  1.00  0.00           C
ATOM   3568  HA  PRO   221     156.452 141.410 197.553  1.00  0.00           H
ATOM   3569  C   PRO   221     155.641 143.386 197.467  1.00  0.00           C
ATOM   3570  O   PRO   221     156.703 143.865 197.846  1.00  0.00           O
ATOM   3571  N   ILE   222     154.512 144.102 197.375  1.00  0.00           N
ATOM   3572  H   ILE   222     153.674 143.596 197.137  1.00  0.00           H
ATOM   3573  CA  ILE   222     154.399 145.579 197.450  1.00  0.00           C
ATOM   3574  HA  ILE   222     155.103 145.996 196.727  1.00  0.00           H
ATOM   3575  CB  ILE   222     152.970 146.017 197.037  1.00  0.00           C
ATOM   3576  HB  ILE   222     152.934 147.108 197.058  1.00  0.00           H
ATOM   3577  CG2 ILE   222     152.683 145.597 195.584  1.00  0.00           C
ATOM   3578 HG21 ILE   222     153.476 145.976 194.940  1.00  0.00           H
ATOM   3579 HG22 ILE   222     151.746 146.037 195.243  1.00  0.00           H
ATOM   3580 HG23 ILE   222     152.629 144.513 195.496  1.00  0.00           H
ATOM   3581  CG1 ILE   222     151.905 145.496 198.035  1.00  0.00           C
ATOM   3582 HG12 ILE   222     151.985 144.414 198.131  1.00  0.00           H
ATOM   3583 HG13 ILE   222     152.099 145.933 199.015  1.00  0.00           H
ATOM   3584  CD1 ILE   222     150.456 145.827 197.657  1.00  0.00           C
ATOM   3585 HD11 ILE   222     150.361 146.888 197.442  1.00  0.00           H
ATOM   3586 HD12 ILE   222     149.796 145.564 198.484  1.00  0.00           H
ATOM   3587 HD13 ILE   222     150.154 145.262 196.778  1.00  0.00           H
ATOM   3588  C   ILE   222     154.790 146.210 198.803  1.00  0.00           C
ATOM   3589  O   ILE   222     154.644 147.418 198.998  1.00  0.00           O
ATOM   3590  N   ILE   223     155.264 145.410 199.758  1.00  0.00           N
ATOM   3591  H   ILE   223     155.419 144.443 199.504  1.00  0.00           H
ATOM   3592  CA  ILE   223     155.749 145.851 201.071  1.00  0.00           C
ATOM   3593  HA  ILE   223     155.067 146.636 201.393  1.00  0.00           H
ATOM   3594  CB  ILE   223     155.611 144.675 202.072  1.00  0.00           C
ATOM   3595  HB  ILE   223     154.625 144.233 201.914  1.00  0.00           H
ATOM   3596  CG2 ILE   223     156.655 143.577 201.807  1.00  0.00           C
ATOM   3597 HG21 ILE   223     156.645 143.286 200.755  1.00  0.00           H
ATOM   3598 HG22 ILE   223     156.413 142.695 202.403  1.00  0.00           H
ATOM   3599 HG23 ILE   223     157.646 143.931 202.078  1.00  0.00           H
ATOM   3600  CG1 ILE   223     155.686 145.060 203.566  1.00  0.00           C
ATOM   3601 HG12 ILE   223     155.460 144.168 204.151  1.00  0.00           H
ATOM   3602 HG13 ILE   223     156.694 145.379 203.830  1.00  0.00           H
ATOM   3603  CD1 ILE   223     154.695 146.151 203.988  1.00  0.00           C
ATOM   3604 HD11 ILE   223     154.973 147.108 203.548  1.00  0.00           H
ATOM   3605 HD12 ILE   223     154.714 146.251 205.074  1.00  0.00           H
ATOM   3606 HD13 ILE   223     153.687 145.879 203.673  1.00  0.00           H
ATOM   3607  C   ILE   223     157.146 146.511 201.013  1.00  0.00           C
ATOM   3608  O   ILE   223     157.716 146.840 202.049  1.00  0.00           O
ATOM   3609  N   ASP   224     157.715 146.739 199.825  1.00  0.00           N
ATOM   3610  H   ASP   224     157.243 146.407 198.984  1.00  0.00           H
ATOM   3611  CA  ASP   224     158.780 147.724 199.584  1.00  0.00           C
ATOM   3612  HA  ASP   224     159.441 147.754 200.448  1.00  0.00           H
ATOM   3613  CB  ASP   224     159.635 147.326 198.365  1.00  0.00           C
ATOM   3614  HB2 ASP   224     160.373 148.112 198.204  1.00  0.00           H
ATOM   3615  HB3 ASP   224     160.183 146.417 198.614  1.00  0.00           H
ATOM   3616  CG  ASP   224     158.878 147.078 197.049  1.00  0.00           C
ATOM   3617  OD1 ASP   224     157.627 146.980 197.084  1.00  0.00           O
ATOM   3618  OD2 ASP   224     159.580 147.004 196.014  1.00  0.00           O
ATOM   3619  C   ASP   224     158.230 149.155 199.423  1.00  0.00           C
ATOM   3620  O   ASP   224     158.724 150.070 200.084  1.00  0.00           O
ATOM   3621  N   TYR   225     157.186 149.366 198.614  1.00  0.00           N
ATOM   3622  H   TYR   225     156.900 148.595 198.010  1.00  0.00           H
ATOM   3623  CA  TYR   225     156.542 150.680 198.446  1.00  0.00           C
ATOM   3624  HA  TYR   225     157.324 151.435 198.418  1.00  0.00           H
ATOM   3625  CB  TYR   225     155.792 150.751 197.102  1.00  0.00           C
ATOM   3626  HB2 TYR   225     154.903 150.119 197.158  1.00  0.00           H
ATOM   3627  HB3 TYR   225     155.466 151.777 196.927  1.00  0.00           H
ATOM   3628  CG  TYR   225     156.652 150.305 195.937  1.00  0.00           C
ATOM   3629  CD1 TYR   225     156.323 149.138 195.223  1.00  0.00           C
ATOM   3630  HD1 TYR   225     155.401 148.615 195.428  1.00  0.00           H
ATOM   3631  CE1 TYR   225     157.270 148.564 194.358  1.00  0.00           C
ATOM   3632  HE1 TYR   225     157.085 147.608 193.904  1.00  0.00           H
ATOM   3633  CZ  TYR   225     158.546 149.143 194.222  1.00  0.00           C
ATOM   3634  OH  TYR   225     159.544 148.399 193.688  1.00  0.00           O
ATOM   3635  HH  TYR   225     159.690 147.686 194.344  1.00  0.00           H
ATOM   3636  CE2 TYR   225     158.835 150.371 194.848  1.00  0.00           C
ATOM   3637  HE2 TYR   225     159.816 150.813 194.747  1.00  0.00           H
ATOM   3638  CD2 TYR   225     157.878 150.954 195.695  1.00  0.00           C
ATOM   3639  HD2 TYR   225     158.118 151.862 196.220  1.00  0.00           H
ATOM   3640  C   TYR   225     155.625 151.041 199.620  1.00  0.00           C
ATOM   3641  O   TYR   225     155.627 152.185 200.081  1.00  0.00           O
ATOM   3642  N   PHE   226     154.870 150.069 200.144  1.00  0.00           N
ATOM   3643  H   PHE   226     154.916 149.154 199.698  1.00  0.00           H
ATOM   3644  CA  PHE   226     153.844 150.269 201.174  1.00  0.00           C
ATOM   3645  HA  PHE   226     153.610 151.333 201.186  1.00  0.00           H
ATOM   3646  CB  PHE   226     152.543 149.572 200.722  1.00  0.00           C
ATOM   3647  HB2 PHE   226     152.740 148.501 200.646  1.00  0.00           H
ATOM   3648  HB3 PHE   226     151.788 149.700 201.496  1.00  0.00           H
ATOM   3649  CG  PHE   226     151.903 150.042 199.414  1.00  0.00           C
ATOM   3650  CD1 PHE   226     152.272 151.243 198.766  1.00  0.00           C
ATOM   3651  HD1 PHE   226     153.043 151.882 199.166  1.00  0.00           H
ATOM   3652  CE1 PHE   226     151.641 151.637 197.573  1.00  0.00           C
ATOM   3653  HE1 PHE   226     151.951 152.547 197.078  1.00  0.00           H
ATOM   3654  CZ  PHE   226     150.615 150.851 197.026  1.00  0.00           C
ATOM   3655  HZ  PHE   226     150.131 151.156 196.108  1.00  0.00           H
ATOM   3656  CE2 PHE   226     150.216 149.673 197.679  1.00  0.00           C
ATOM   3657  HE2 PHE   226     149.416 149.075 197.269  1.00  0.00           H
ATOM   3658  CD2 PHE   226     150.860 149.272 198.865  1.00  0.00           C
ATOM   3659  HD2 PHE   226     150.544 148.369 199.368  1.00  0.00           H
ATOM   3660  C   PHE   226     154.231 149.993 202.657  1.00  0.00           C
ATOM   3661  O   PHE   226     153.323 149.738 203.454  1.00  0.00           O
ATOM   3662  N   PRO   227     155.493 150.152 203.133  1.00  0.00           N
ATOM   3663  CD  PRO   227     156.754 150.048 202.418  1.00  0.00           C
ATOM   3664  HD2 PRO   227     156.979 150.994 201.926  1.00  0.00           H
ATOM   3665  HD3 PRO   227     156.733 149.231 201.700  1.00  0.00           H
ATOM   3666  CG  PRO   227     157.822 149.771 203.472  1.00  0.00           C
ATOM   3667  HG2 PRO   227     158.807 150.113 203.151  1.00  0.00           H
ATOM   3668  HG3 PRO   227     157.840 148.712 203.725  1.00  0.00           H
ATOM   3669  CB  PRO   227     157.299 150.560 204.662  1.00  0.00           C
ATOM   3670  HB2 PRO   227     157.549 151.615 204.535  1.00  0.00           H
ATOM   3671  HB3 PRO   227     157.696 150.181 205.605  1.00  0.00           H
ATOM   3672  CA  PRO   227     155.784 150.353 204.561  1.00  0.00           C
ATOM   3673  HA  PRO   227     155.521 149.441 205.094  1.00  0.00           H
ATOM   3674  C   PRO   227     155.043 151.546 205.192  1.00  0.00           C
ATOM   3675  O   PRO   227     154.880 151.600 206.413  1.00  0.00           O
ATOM   3676  N   GLY   228     154.563 152.491 204.373  1.00  0.00           N
ATOM   3677  H   GLY   228     154.754 152.399 203.386  1.00  0.00           H
ATOM   3678  CA  GLY   228     153.603 153.512 204.791  1.00  0.00           C
ATOM   3679  HA2 GLY   228     154.086 154.186 205.499  1.00  0.00           H
ATOM   3680  HA3 GLY   228     153.279 154.091 203.926  1.00  0.00           H
ATOM   3681  C   GLY   228     152.369 152.879 205.445  1.00  0.00           C
ATOM   3682  O   GLY   228     151.826 151.886 204.963  1.00  0.00           O
ATOM   3683  N   THR   229     151.938 153.432 206.579  1.00  0.00           N
ATOM   3684  H   THR   229     152.404 154.273 206.886  1.00  0.00           H
ATOM   3685  CA  THR   229     150.948 152.845 207.508  1.00  0.00           C
ATOM   3686  HA  THR   229     150.821 153.566 208.315  1.00  0.00           H
ATOM   3687  CB  THR   229     149.556 152.718 206.857  1.00  0.00           C
ATOM   3688  HB  THR   229     149.586 151.975 206.067  1.00  0.00           H
ATOM   3689  CG2 THR   229     148.465 152.328 207.844  1.00  0.00           C
ATOM   3690 HG21 THR   229     148.418 153.067 208.643  1.00  0.00           H
ATOM   3691 HG22 THR   229     148.669 151.343 208.260  1.00  0.00           H
ATOM   3692 HG23 THR   229     147.504 152.296 207.329  1.00  0.00           H
ATOM   3693  OG1 THR   229     149.166 153.956 206.308  1.00  0.00           O
ATOM   3694  HG1 THR   229     149.572 154.025 205.439  1.00  0.00           H
ATOM   3695  C   THR   229     151.403 151.542 208.197  1.00  0.00           C
ATOM   3696  O   THR   229     151.268 151.456 209.415  1.00  0.00           O
ATOM   3697  N   HID   230     152.026 150.575 207.506  1.00  0.00           N
ATOM   3698  H   HID   230     152.134 150.690 206.504  1.00  0.00           H
ATOM   3699  CA  HID   230     152.583 149.354 208.129  1.00  0.00           C
ATOM   3700  HA  HID   230     151.768 148.787 208.580  1.00  0.00           H
ATOM   3701  CB  HID   230     153.261 148.464 207.073  1.00  0.00           C
ATOM   3702  HB2 HID   230     153.862 149.084 206.415  1.00  0.00           H
ATOM   3703  HB3 HID   230     153.938 147.773 207.579  1.00  0.00           H
ATOM   3704  CG  HID   230     152.323 147.634 206.238  1.00  0.00           C
ATOM   3705  ND1 HID   230     151.767 147.972 205.025  1.00  0.00           N
ATOM   3706  HD1 HID   230     152.046 148.758 204.440  1.00  0.00           H
ATOM   3707  CE1 HID   230     151.018 146.935 204.608  1.00  0.00           C
ATOM   3708  HE1 HID   230     150.480 146.886 203.668  1.00  0.00           H
ATOM   3709  NE2 HID   230     151.074 145.933 205.501  1.00  0.00           N
ATOM   3710  CD2 HID   230     151.905 146.365 206.533  1.00  0.00           C
ATOM   3711  HD2 HID   230     152.175 145.792 207.409  1.00  0.00           H
ATOM   3712  C   HID   230     153.594 149.652 209.254  1.00  0.00           C
ATOM   3713  O   HID   230     153.602 148.964 210.273  1.00  0.00           O
ATOM   3714  N   ASN   231     154.399 150.714 209.126  1.00  0.00           N
ATOM   3715  H   ASN   231     154.403 151.190 208.229  1.00  0.00           H
ATOM   3716  CA  ASN   231     155.356 151.162 210.148  1.00  0.00           C
ATOM   3717  HA  ASN   231     156.116 150.389 210.272  1.00  0.00           H
ATOM   3718  CB  ASN   231     156.033 152.435 209.607  1.00  0.00           C
ATOM   3719  HB2 ASN   231     156.535 152.210 208.666  1.00  0.00           H
ATOM   3720  HB3 ASN   231     155.276 153.194 209.412  1.00  0.00           H
ATOM   3721  CG  ASN   231     157.038 153.030 210.577  1.00  0.00           C
ATOM   3722  OD1 ASN   231     156.696 153.794 211.460  1.00  0.00           O
ATOM   3723  ND2 ASN   231     158.304 152.713 210.442  1.00  0.00           N
ATOM   3724 HD21 ASN   231     158.616 152.119 209.696  1.00  0.00           H
ATOM   3725 HD22 ASN   231     158.943 153.169 211.070  1.00  0.00           H
ATOM   3726  C   ASN   231     154.723 151.388 211.543  1.00  0.00           C
ATOM   3727  O   ASN   231     155.409 151.236 212.557  1.00  0.00           O
ATOM   3728  N   LYS   232     153.409 151.665 211.607  1.00  0.00           N
ATOM   3729  H   LYS   232     152.893 151.691 210.734  1.00  0.00           H
ATOM   3730  CA  LYS   232     152.644 151.806 212.855  1.00  0.00           C
ATOM   3731  HA  LYS   232     153.038 152.655 213.413  1.00  0.00           H
ATOM   3732  CB  LYS   232     151.167 152.055 212.499  1.00  0.00           C
ATOM   3733  HB2 LYS   232     151.111 152.775 211.681  1.00  0.00           H
ATOM   3734  HB3 LYS   232     150.742 151.120 212.131  1.00  0.00           H
ATOM   3735  CG  LYS   232     150.295 152.556 213.667  1.00  0.00           C
ATOM   3736  HG2 LYS   232     149.368 151.981 213.666  1.00  0.00           H
ATOM   3737  HG3 LYS   232     150.787 152.386 214.624  1.00  0.00           H
ATOM   3738  CD  LYS   232     149.919 154.039 213.524  1.00  0.00           C
ATOM   3739  HD2 LYS   232     149.456 154.185 212.547  1.00  0.00           H
ATOM   3740  HD3 LYS   232     149.162 154.282 214.269  1.00  0.00           H
ATOM   3741  CE  LYS   232     151.107 155.007 213.645  1.00  0.00           C
ATOM   3742  HE2 LYS   232     151.952 154.620 213.071  1.00  0.00           H
ATOM   3743  HE3 LYS   232     150.802 155.962 213.206  1.00  0.00           H
ATOM   3744  NZ  LYS   232     151.495 155.246 215.054  1.00  0.00           N
ATOM   3745  HZ1 LYS   232     152.263 155.890 215.137  1.00  0.00           H
ATOM   3746  HZ2 LYS   232     151.730 154.390 215.554  1.00  0.00           H
ATOM   3747  HZ3 LYS   232     150.704 155.663 215.558  1.00  0.00           H
ATOM   3748  C   LYS   232     152.786 150.579 213.761  1.00  0.00           C
ATOM   3749  O   LYS   232     152.951 150.755 214.961  1.00  0.00           O
ATOM   3750  N   LEU   233     152.789 149.363 213.200  1.00  0.00           N
ATOM   3751  H   LEU   233     152.720 149.300 212.192  1.00  0.00           H
ATOM   3752  CA  LEU   233     152.997 148.117 213.953  1.00  0.00           C
ATOM   3753  HA  LEU   233     152.215 148.000 214.705  1.00  0.00           H
ATOM   3754  CB  LEU   233     152.968 146.904 212.996  1.00  0.00           C
ATOM   3755  HB2 LEU   233     153.580 147.119 212.120  1.00  0.00           H
ATOM   3756  HB3 LEU   233     153.444 146.068 213.514  1.00  0.00           H
ATOM   3757  CG  LEU   233     151.585 146.406 212.541  1.00  0.00           C
ATOM   3758  HG  LEU   233     151.035 146.071 213.419  1.00  0.00           H
ATOM   3759  CD1 LEU   233     150.734 147.447 211.808  1.00  0.00           C
ATOM   3760 HD11 LEU   233     150.454 148.245 212.493  1.00  0.00           H
ATOM   3761 HD12 LEU   233     149.821 146.976 211.445  1.00  0.00           H
ATOM   3762 HD13 LEU   233     151.285 147.853 210.961  1.00  0.00           H
ATOM   3763  CD2 LEU   233     151.780 145.221 211.593  1.00  0.00           C
ATOM   3764 HD21 LEU   233     152.329 145.536 210.705  1.00  0.00           H
ATOM   3765 HD22 LEU   233     152.350 144.439 212.101  1.00  0.00           H
ATOM   3766 HD23 LEU   233     150.817 144.811 211.294  1.00  0.00           H
ATOM   3767  C   LEU   233     154.343 148.163 214.688  1.00  0.00           C
ATOM   3768  O   LEU   233     154.395 148.055 215.913  1.00  0.00           O
ATOM   3769  N   LEU   234     155.416 148.413 213.931  1.00  0.00           N
ATOM   3770  H   LEU   234     155.260 148.535 212.943  1.00  0.00           H
ATOM   3771  CA  LEU   234     156.795 148.408 214.415  1.00  0.00           C
ATOM   3772  HA  LEU   234     157.015 147.421 214.821  1.00  0.00           H
ATOM   3773  CB  LEU   234     157.762 148.692 213.244  1.00  0.00           C
ATOM   3774  HB2 LEU   234     157.583 149.705 212.884  1.00  0.00           H
ATOM   3775  HB3 LEU   234     158.783 148.655 213.627  1.00  0.00           H
ATOM   3776  CG  LEU   234     157.653 147.732 212.043  1.00  0.00           C
ATOM   3777  HG  LEU   234     156.632 147.736 211.660  1.00  0.00           H
ATOM   3778  CD1 LEU   234     158.579 148.205 210.922  1.00  0.00           C
ATOM   3779 HD11 LEU   234     158.314 149.218 210.625  1.00  0.00           H
ATOM   3780 HD12 LEU   234     158.474 147.546 210.060  1.00  0.00           H
ATOM   3781 HD13 LEU   234     159.616 148.187 211.260  1.00  0.00           H
ATOM   3782  CD2 LEU   234     158.044 146.306 212.417  1.00  0.00           C
ATOM   3783 HD21 LEU   234     159.051 146.284 212.831  1.00  0.00           H
ATOM   3784 HD22 LEU   234     157.338 145.912 213.150  1.00  0.00           H
ATOM   3785 HD23 LEU   234     157.993 145.664 211.537  1.00  0.00           H
ATOM   3786  C   LEU   234     157.003 149.413 215.554  1.00  0.00           C
ATOM   3787  O   LEU   234     157.418 149.029 216.649  1.00  0.00           O
ATOM   3788  N   LYS   235     156.703 150.702 215.325  1.00  0.00           N
ATOM   3789  H   LYS   235     156.320 150.958 214.418  1.00  0.00           H
ATOM   3790  CA  LYS   235     156.998 151.741 216.325  1.00  0.00           C
ATOM   3791  HA  LYS   235     157.969 151.482 216.745  1.00  0.00           H
ATOM   3792  CB  LYS   235     157.122 153.140 215.680  1.00  0.00           C
ATOM   3793  HB2 LYS   235     157.013 153.057 214.596  1.00  0.00           H
ATOM   3794  HB3 LYS   235     156.308 153.775 216.035  1.00  0.00           H
ATOM   3795  CG  LYS   235     158.469 153.850 215.964  1.00  0.00           C
ATOM   3796  HG2 LYS   235     159.269 153.302 215.463  1.00  0.00           H
ATOM   3797  HG3 LYS   235     158.419 154.848 215.527  1.00  0.00           H
ATOM   3798  CD  LYS   235     158.821 153.984 217.460  1.00  0.00           C
ATOM   3799  HD2 LYS   235     157.929 154.318 217.992  1.00  0.00           H
ATOM   3800  HD3 LYS   235     159.097 153.009 217.862  1.00  0.00           H
ATOM   3801  CE  LYS   235     159.948 154.984 217.785  1.00  0.00           C
ATOM   3802  HE2 LYS   235     159.648 155.985 217.460  1.00  0.00           H
ATOM   3803  HE3 LYS   235     160.052 155.016 218.874  1.00  0.00           H
ATOM   3804  NZ  LYS   235     161.271 154.641 217.201  1.00  0.00           N
ATOM   3805  HZ1 LYS   235     161.481 153.646 217.231  1.00  0.00           H
ATOM   3806  HZ2 LYS   235     162.010 155.077 217.758  1.00  0.00           H
ATOM   3807  HZ3 LYS   235     161.365 154.953 216.246  1.00  0.00           H
ATOM   3808  C   LYS   235     156.034 151.712 217.519  1.00  0.00           C
ATOM   3809  O   LYS   235     156.483 151.990 218.630  1.00  0.00           O
ATOM   3810  N   ASN   236     154.759 151.337 217.348  1.00  0.00           N
ATOM   3811  H   ASN   236     154.415 151.123 216.418  1.00  0.00           H
ATOM   3812  CA  ASN   236     153.847 151.187 218.490  1.00  0.00           C
ATOM   3813  HA  ASN   236     153.971 152.056 219.140  1.00  0.00           H
ATOM   3814  CB  ASN   236     152.372 151.153 218.059  1.00  0.00           C
ATOM   3815  HB2 ASN   236     152.217 150.444 217.251  1.00  0.00           H
ATOM   3816  HB3 ASN   236     151.781 150.800 218.905  1.00  0.00           H
ATOM   3817  CG  ASN   236     151.854 152.525 217.663  1.00  0.00           C
ATOM   3818  OD1 ASN   236     152.324 153.181 216.742  1.00  0.00           O
ATOM   3819  ND2 ASN   236     150.877 153.028 218.375  1.00  0.00           N
ATOM   3820 HD21 ASN   236     150.453 152.493 219.123  1.00  0.00           H
ATOM   3821 HD22 ASN   236     150.594 153.985 218.164  1.00  0.00           H
ATOM   3822  C   ASN   236     154.194 149.968 219.352  1.00  0.00           C
ATOM   3823  O   ASN   236     154.239 150.109 220.571  1.00  0.00           O
ATOM   3824  N   VAL   237     154.489 148.797 218.774  1.00  0.00           N
ATOM   3825  H   VAL   237     154.445 148.699 217.761  1.00  0.00           H
ATOM   3826  CA  VAL   237     154.897 147.635 219.586  1.00  0.00           C
ATOM   3827  HA  VAL   237     154.165 147.510 220.384  1.00  0.00           H
ATOM   3828  CB  VAL   237     154.900 146.324 218.775  1.00  0.00           C
ATOM   3829  HB  VAL   237     155.535 146.442 217.897  1.00  0.00           H
ATOM   3830  CG1 VAL   237     155.425 145.151 219.615  1.00  0.00           C
ATOM   3831 HG11 VAL   237     155.251 144.209 219.102  1.00  0.00           H
ATOM   3832 HG12 VAL   237     156.497 145.257 219.769  1.00  0.00           H
ATOM   3833 HG13 VAL   237     154.922 145.124 220.583  1.00  0.00           H
ATOM   3834  CG2 VAL   237     153.478 145.955 218.327  1.00  0.00           C
ATOM   3835 HG21 VAL   237     153.513 145.064 217.700  1.00  0.00           H
ATOM   3836 HG22 VAL   237     153.045 146.763 217.738  1.00  0.00           H
ATOM   3837 HG23 VAL   237     152.844 145.769 219.194  1.00  0.00           H
ATOM   3838  C   VAL   237     156.238 147.895 220.281  1.00  0.00           C
ATOM   3839  O   VAL   237     156.373 147.565 221.457  1.00  0.00           O
ATOM   3840  N   ALA   238     157.190 148.571 219.626  1.00  0.00           N
ATOM   3841  H   ALA   238     157.060 148.779 218.641  1.00  0.00           H
ATOM   3842  CA  ALA   238     158.426 149.022 220.272  1.00  0.00           C
ATOM   3843  HA  ALA   238     158.939 148.150 220.681  1.00  0.00           H
ATOM   3844  CB  ALA   238     159.336 149.655 219.213  1.00  0.00           C
ATOM   3845  HB1 ALA   238     158.854 150.529 218.778  1.00  0.00           H
ATOM   3846  HB2 ALA   238     159.548 148.930 218.426  1.00  0.00           H
ATOM   3847  HB3 ALA   238     160.277 149.957 219.675  1.00  0.00           H
ATOM   3848  C   ALA   238     158.167 149.989 221.448  1.00  0.00           C
ATOM   3849  O   ALA   238     158.767 149.828 222.509  1.00  0.00           O
ATOM   3850  N   PHE   239     157.243 150.949 221.303  1.00  0.00           N
ATOM   3851  H   PHE   239     156.801 151.067 220.399  1.00  0.00           H
ATOM   3852  CA  PHE   239     156.821 151.828 222.401  1.00  0.00           C
ATOM   3853  HA  PHE   239     157.700 152.344 222.792  1.00  0.00           H
ATOM   3854  CB  PHE   239     155.843 152.895 221.880  1.00  0.00           C
ATOM   3855  HB2 PHE   239     156.384 153.574 221.219  1.00  0.00           H
ATOM   3856  HB3 PHE   239     155.068 152.415 221.285  1.00  0.00           H
ATOM   3857  CG  PHE   239     155.167 153.701 222.975  1.00  0.00           C
ATOM   3858  CD1 PHE   239     153.898 153.318 223.456  1.00  0.00           C
ATOM   3859  HD1 PHE   239     153.392 152.461 223.036  1.00  0.00           H
ATOM   3860  CE1 PHE   239     153.295 154.029 224.509  1.00  0.00           C
ATOM   3861  HE1 PHE   239     152.331 153.720 224.892  1.00  0.00           H
ATOM   3862  CZ  PHE   239     153.953 155.132 225.079  1.00  0.00           C
ATOM   3863  HZ  PHE   239     153.496 155.671 225.898  1.00  0.00           H
ATOM   3864  CE2 PHE   239     155.217 155.520 224.599  1.00  0.00           C
ATOM   3865  HE2 PHE   239     155.730 156.358 225.051  1.00  0.00           H
ATOM   3866  CD2 PHE   239     155.824 154.804 223.552  1.00  0.00           C
ATOM   3867  HD2 PHE   239     156.807 155.092 223.207  1.00  0.00           H
ATOM   3868  C   PHE   239     156.218 151.035 223.572  1.00  0.00           C
ATOM   3869  O   PHE   239     156.678 151.180 224.705  1.00  0.00           O
ATOM   3870  N   MET   240     155.250 150.151 223.306  1.00  0.00           N
ATOM   3871  H   MET   240     154.929 150.063 222.347  1.00  0.00           H
ATOM   3872  CA  MET   240     154.597 149.345 224.347  1.00  0.00           C
ATOM   3873  HA  MET   240     154.180 150.020 225.096  1.00  0.00           H
ATOM   3874  CB  MET   240     153.441 148.522 223.749  1.00  0.00           C
ATOM   3875  HB2 MET   240     153.842 147.864 222.976  1.00  0.00           H
ATOM   3876  HB3 MET   240     153.003 147.898 224.529  1.00  0.00           H
ATOM   3877  CG  MET   240     152.333 149.388 223.124  1.00  0.00           C
ATOM   3878  HG2 MET   240     152.783 150.105 222.446  1.00  0.00           H
ATOM   3879  HG3 MET   240     151.689 148.742 222.526  1.00  0.00           H
ATOM   3880  SD  MET   240     151.281 150.330 224.263  1.00  0.00           S
ATOM   3881  CE  MET   240     150.116 149.038 224.773  1.00  0.00           C
ATOM   3882  HE1 MET   240     150.634 148.281 225.363  1.00  0.00           H
ATOM   3883  HE2 MET   240     149.324 149.484 225.373  1.00  0.00           H
ATOM   3884  HE3 MET   240     149.669 148.575 223.894  1.00  0.00           H
ATOM   3885  C   MET   240     155.612 148.444 225.072  1.00  0.00           C
ATOM   3886  O   MET   240     155.629 148.417 226.302  1.00  0.00           O
ATOM   3887  N   LYS   241     156.523 147.790 224.333  1.00  0.00           N
ATOM   3888  H   LYS   241     156.454 147.853 223.321  1.00  0.00           H
ATOM   3889  CA  LYS   241     157.648 147.026 224.903  1.00  0.00           C
ATOM   3890  HA  LYS   241     157.258 146.271 225.585  1.00  0.00           H
ATOM   3891  CB  LYS   241     158.432 146.295 223.799  1.00  0.00           C
ATOM   3892  HB2 LYS   241     158.631 146.980 222.973  1.00  0.00           H
ATOM   3893  HB3 LYS   241     159.387 145.960 224.208  1.00  0.00           H
ATOM   3894  CG  LYS   241     157.663 145.061 223.295  1.00  0.00           C
ATOM   3895  HG2 LYS   241     157.585 144.334 224.104  1.00  0.00           H
ATOM   3896  HG3 LYS   241     156.651 145.358 223.019  1.00  0.00           H
ATOM   3897  CD  LYS   241     158.307 144.395 222.069  1.00  0.00           C
ATOM   3898  HD2 LYS   241     157.662 143.578 221.741  1.00  0.00           H
ATOM   3899  HD3 LYS   241     158.342 145.129 221.263  1.00  0.00           H
ATOM   3900  CE  LYS   241     159.729 143.847 222.269  1.00  0.00           C
ATOM   3901  HE2 LYS   241     160.071 143.438 221.314  1.00  0.00           H
ATOM   3902  HE3 LYS   241     160.404 144.659 222.553  1.00  0.00           H
ATOM   3903  NZ  LYS   241     159.796 142.772 223.280  1.00  0.00           N
ATOM   3904  HZ1 LYS   241     160.535 142.108 223.032  1.00  0.00           H
ATOM   3905  HZ2 LYS   241     158.964 142.208 223.295  1.00  0.00           H
ATOM   3906  HZ3 LYS   241     159.974 143.139 224.220  1.00  0.00           H
ATOM   3907  C   LYS   241     158.572 147.899 225.753  1.00  0.00           C
ATOM   3908  O   LYS   241     158.953 147.472 226.832  1.00  0.00           O
ATOM   3909  N   SER   242     158.876 149.135 225.348  1.00  0.00           N
ATOM   3910  H   SER   242     158.568 149.434 224.431  1.00  0.00           H
ATOM   3911  CA  SER   242     159.738 150.027 226.145  1.00  0.00           C
ATOM   3912  HA  SER   242     160.671 149.495 226.330  1.00  0.00           H
ATOM   3913  CB  SER   242     160.096 151.291 225.353  1.00  0.00           C
ATOM   3914  HB2 SER   242     160.956 151.763 225.830  1.00  0.00           H
ATOM   3915  HB3 SER   242     160.384 151.012 224.339  1.00  0.00           H
ATOM   3916  OG  SER   242     159.049 152.242 225.301  1.00  0.00           O
ATOM   3917  HG  SER   242     158.210 151.801 225.067  1.00  0.00           H
ATOM   3918  C   SER   242     159.153 150.366 227.528  1.00  0.00           C
ATOM   3919  O   SER   242     159.901 150.405 228.504  1.00  0.00           O
ATOM   3920  N   TYR   243     157.827 150.529 227.643  1.00  0.00           N
ATOM   3921  H   TYR   243     157.259 150.495 226.807  1.00  0.00           H
ATOM   3922  CA  TYR   243     157.162 150.718 228.939  1.00  0.00           C
ATOM   3923  HA  TYR   243     157.766 151.403 229.536  1.00  0.00           H
ATOM   3924  CB  TYR   243     155.789 151.369 228.728  1.00  0.00           C
ATOM   3925  HB2 TYR   243     155.918 152.272 228.130  1.00  0.00           H
ATOM   3926  HB3 TYR   243     155.154 150.687 228.160  1.00  0.00           H
ATOM   3927  CG  TYR   243     155.089 151.758 230.021  1.00  0.00           C
ATOM   3928  CD1 TYR   243     155.615 152.798 230.815  1.00  0.00           C
ATOM   3929  HD1 TYR   243     156.524 153.303 230.518  1.00  0.00           H
ATOM   3930  CE1 TYR   243     154.973 153.177 232.009  1.00  0.00           C
ATOM   3931  HE1 TYR   243     155.395 153.961 232.624  1.00  0.00           H
ATOM   3932  CZ  TYR   243     153.795 152.515 232.415  1.00  0.00           C
ATOM   3933  OH  TYR   243     153.181 152.861 233.577  1.00  0.00           O
ATOM   3934  HH  TYR   243     153.471 153.734 233.900  1.00  0.00           H
ATOM   3935  CE2 TYR   243     153.277 151.461 231.631  1.00  0.00           C
ATOM   3936  HE2 TYR   243     152.384 150.951 231.956  1.00  0.00           H
ATOM   3937  CD2 TYR   243     153.923 151.084 230.436  1.00  0.00           C
ATOM   3938  HD2 TYR   243     153.523 150.276 229.840  1.00  0.00           H
ATOM   3939  C   TYR   243     157.052 149.406 229.734  1.00  0.00           C
ATOM   3940  O   TYR   243     157.306 149.390 230.940  1.00  0.00           O
ATOM   3941  N   ILE   244     156.753 148.284 229.061  1.00  0.00           N
ATOM   3942  H   ILE   244     156.548 148.353 228.070  1.00  0.00           H
ATOM   3943  CA  ILE   244     156.792 146.949 229.680  1.00  0.00           C
ATOM   3944  HA  ILE   244     156.078 146.936 230.501  1.00  0.00           H
ATOM   3945  CB  ILE   244     156.392 145.842 228.668  1.00  0.00           C
ATOM   3946  HB  ILE   244     156.982 145.982 227.765  1.00  0.00           H
ATOM   3947  CG2 ILE   244     156.696 144.434 229.213  1.00  0.00           C
ATOM   3948 HG21 ILE   244     157.772 144.306 229.343  1.00  0.00           H
ATOM   3949 HG22 ILE   244     156.365 143.671 228.509  1.00  0.00           H
ATOM   3950 HG23 ILE   244     156.199 144.277 230.170  1.00  0.00           H
ATOM   3951  CG1 ILE   244     154.891 145.928 228.302  1.00  0.00           C
ATOM   3952 HG12 ILE   244     154.297 145.499 229.107  1.00  0.00           H
ATOM   3953 HG13 ILE   244     154.597 146.971 228.197  1.00  0.00           H
ATOM   3954  CD1 ILE   244     154.522 145.209 226.995  1.00  0.00           C
ATOM   3955 HD11 ILE   244     155.114 145.603 226.169  1.00  0.00           H
ATOM   3956 HD12 ILE   244     153.466 145.374 226.780  1.00  0.00           H
ATOM   3957 HD13 ILE   244     154.694 144.137 227.082  1.00  0.00           H
ATOM   3958  C   ILE   244     158.175 146.696 230.298  1.00  0.00           C
ATOM   3959  O   ILE   244     158.246 146.295 231.455  1.00  0.00           O
ATOM   3960  N   LEU   245     159.261 147.004 229.588  1.00  0.00           N
ATOM   3961  H   LEU   245     159.126 147.282 228.622  1.00  0.00           H
ATOM   3962  CA  LEU   245     160.638 146.753 230.012  1.00  0.00           C
ATOM   3963  HA  LEU   245     160.735 145.677 230.169  1.00  0.00           H
ATOM   3964  CB  LEU   245     161.566 147.152 228.849  1.00  0.00           C
ATOM   3965  HB2 LEU   245     161.274 146.584 227.963  1.00  0.00           H
ATOM   3966  HB3 LEU   245     161.409 148.209 228.632  1.00  0.00           H
ATOM   3967  CG  LEU   245     163.068 146.928 229.095  1.00  0.00           C
ATOM   3968  HG  LEU   245     163.383 147.498 229.968  1.00  0.00           H
ATOM   3969  CD1 LEU   245     163.422 145.455 229.320  1.00  0.00           C
ATOM   3970 HD11 LEU   245     162.920 145.072 230.206  1.00  0.00           H
ATOM   3971 HD12 LEU   245     164.500 145.327 229.409  1.00  0.00           H
ATOM   3972 HD13 LEU   245     163.069 144.871 228.466  1.00  0.00           H
ATOM   3973  CD2 LEU   245     163.871 147.433 227.897  1.00  0.00           C
ATOM   3974 HD21 LEU   245     163.587 146.871 227.005  1.00  0.00           H
ATOM   3975 HD22 LEU   245     163.660 148.490 227.735  1.00  0.00           H
ATOM   3976 HD23 LEU   245     164.937 147.307 228.080  1.00  0.00           H
ATOM   3977  C   LEU   245     161.015 147.459 231.328  1.00  0.00           C
ATOM   3978  O   LEU   245     161.764 146.883 232.126  1.00  0.00           O
ATOM   3979  N   GLU   246     160.511 148.672 231.596  1.00  0.00           N
ATOM   3980  H   GLU   246     159.916 149.116 230.905  1.00  0.00           H
ATOM   3981  CA  GLU   246     160.712 149.328 232.900  1.00  0.00           C
ATOM   3982  HA  GLU   246     161.737 149.137 233.203  1.00  0.00           H
ATOM   3983  CB  GLU   246     160.634 150.865 232.818  1.00  0.00           C
ATOM   3984  HB2 GLU   246     160.953 151.234 233.794  1.00  0.00           H
ATOM   3985  HB3 GLU   246     161.364 151.215 232.087  1.00  0.00           H
ATOM   3986  CG  GLU   246     159.273 151.500 232.498  1.00  0.00           C
ATOM   3987  HG2 GLU   246     159.124 151.502 231.417  1.00  0.00           H
ATOM   3988  HG3 GLU   246     158.481 150.906 232.950  1.00  0.00           H
ATOM   3989  CD  GLU   246     159.172 152.932 233.048  1.00  0.00           C
ATOM   3990  OE1 GLU   246     160.133 153.720 232.891  1.00  0.00           O
ATOM   3991  OE2 GLU   246     158.135 153.225 233.686  1.00  0.00           O
ATOM   3992  C   GLU   246     159.829 148.710 234.003  1.00  0.00           C
ATOM   3993  O   GLU   246     160.336 148.374 235.075  1.00  0.00           O
ATOM   3994  N   LYS   247     158.544 148.437 233.726  1.00  0.00           N
ATOM   3995  H   LYS   247     158.197 148.683 232.800  1.00  0.00           H
ATOM   3996  CA  LYS   247     157.619 147.760 234.664  1.00  0.00           C
ATOM   3997  HA  LYS   247     157.614 148.300 235.613  1.00  0.00           H
ATOM   3998  CB  LYS   247     156.196 147.774 234.068  1.00  0.00           C
ATOM   3999  HB2 LYS   247     156.218 147.259 233.106  1.00  0.00           H
ATOM   4000  HB3 LYS   247     155.524 147.220 234.725  1.00  0.00           H
ATOM   4001  CG  LYS   247     155.614 149.186 233.843  1.00  0.00           C
ATOM   4002  HG2 LYS   247     156.336 149.798 233.307  1.00  0.00           H
ATOM   4003  HG3 LYS   247     154.740 149.094 233.196  1.00  0.00           H
ATOM   4004  CD  LYS   247     155.176 149.906 235.133  1.00  0.00           C
ATOM   4005  HD2 LYS   247     154.087 149.870 235.186  1.00  0.00           H
ATOM   4006  HD3 LYS   247     155.560 149.394 236.013  1.00  0.00           H
ATOM   4007  CE  LYS   247     155.610 151.381 235.151  1.00  0.00           C
ATOM   4008  HE2 LYS   247     155.398 151.816 234.173  1.00  0.00           H
ATOM   4009  HE3 LYS   247     155.026 151.923 235.897  1.00  0.00           H
ATOM   4010  NZ  LYS   247     157.050 151.541 235.449  1.00  0.00           N
ATOM   4011  HZ1 LYS   247     157.263 151.405 236.442  1.00  0.00           H
ATOM   4012  HZ2 LYS   247     157.394 152.455 235.139  1.00  0.00           H
ATOM   4013  HZ3 LYS   247     157.596 150.872 234.937  1.00  0.00           H
ATOM   4014  C   LYS   247     158.074 146.326 234.996  1.00  0.00           C
ATOM   4015  O   LYS   247     157.826 145.823 236.096  1.00  0.00           O
ATOM   4016  N   VAL   248     158.796 145.678 234.078  1.00  0.00           N
ATOM   4017  H   VAL   248     158.850 146.109 233.160  1.00  0.00           H
ATOM   4018  CA  VAL   248     159.507 144.410 234.283  1.00  0.00           C
ATOM   4019  HA  VAL   248     158.809 143.683 234.695  1.00  0.00           H
ATOM   4020  CB  VAL   248     160.039 143.840 232.944  1.00  0.00           C
ATOM   4021  HB  VAL   248     160.474 144.652 232.367  1.00  0.00           H
ATOM   4022  CG1 VAL   248     161.116 142.759 233.114  1.00  0.00           C
ATOM   4023 HG11 VAL   248     162.019 143.189 233.542  1.00  0.00           H
ATOM   4024 HG12 VAL   248     160.751 141.957 233.757  1.00  0.00           H
ATOM   4025 HG13 VAL   248     161.374 142.343 232.138  1.00  0.00           H
ATOM   4026  CG2 VAL   248     158.912 143.205 232.120  1.00  0.00           C
ATOM   4027 HG21 VAL   248     158.601 142.259 232.561  1.00  0.00           H
ATOM   4028 HG22 VAL   248     159.264 143.022 231.103  1.00  0.00           H
ATOM   4029 HG23 VAL   248     158.051 143.869 232.070  1.00  0.00           H
ATOM   4030  C   VAL   248     160.619 144.572 235.318  1.00  0.00           C
ATOM   4031  O   VAL   248     160.645 143.788 236.262  1.00  0.00           O
ATOM   4032  N   LYS   249     161.514 145.570 235.219  1.00  0.00           N
ATOM   4033  H   LYS   249     161.387 146.271 234.497  1.00  0.00           H
ATOM   4034  CA  LYS   249     162.632 145.708 236.184  1.00  0.00           C
ATOM   4035  HA  LYS   249     162.955 144.697 236.414  1.00  0.00           H
ATOM   4036  CB  LYS   249     163.876 146.387 235.605  1.00  0.00           C
ATOM   4037  HB2 LYS   249     164.614 146.501 236.396  1.00  0.00           H
ATOM   4038  HB3 LYS   249     164.310 145.696 234.900  1.00  0.00           H
ATOM   4039  CG  LYS   249     163.691 147.746 234.927  1.00  0.00           C
ATOM   4040  HG2 LYS   249     162.826 147.721 234.277  1.00  0.00           H
ATOM   4041  HG3 LYS   249     163.530 148.502 235.696  1.00  0.00           H
ATOM   4042  CD  LYS   249     164.944 148.101 234.104  1.00  0.00           C
ATOM   4043  HD2 LYS   249     165.027 149.189 234.073  1.00  0.00           H
ATOM   4044  HD3 LYS   249     165.831 147.737 234.626  1.00  0.00           H
ATOM   4045  CE  LYS   249     164.967 147.598 232.643  1.00  0.00           C
ATOM   4046  HE2 LYS   249     164.361 148.286 232.044  1.00  0.00           H
ATOM   4047  HE3 LYS   249     165.996 147.669 232.278  1.00  0.00           H
ATOM   4048  NZ  LYS   249     164.448 146.217 232.443  1.00  0.00           N
ATOM   4049  HZ1 LYS   249     163.440 146.215 232.587  1.00  0.00           H
ATOM   4050  HZ2 LYS   249     164.858 145.531 233.075  1.00  0.00           H
ATOM   4051  HZ3 LYS   249     164.599 145.901 231.496  1.00  0.00           H
ATOM   4052  C   LYS   249     162.255 146.243 237.560  1.00  0.00           C
ATOM   4053  O   LYS   249     162.853 145.796 238.533  1.00  0.00           O
ATOM   4054  N   GLU   250     161.148 146.975 237.675  1.00  0.00           N
ATOM   4055  H   GLU   250     160.748 147.381 236.835  1.00  0.00           H
ATOM   4056  CA  GLU   250     160.467 147.205 238.965  1.00  0.00           C
ATOM   4057  HA  GLU   250     161.152 147.724 239.639  1.00  0.00           H
ATOM   4058  CB  GLU   250     159.238 148.097 238.742  1.00  0.00           C
ATOM   4059  HB2 GLU   250     158.648 147.668 237.931  1.00  0.00           H
ATOM   4060  HB3 GLU   250     158.625 148.108 239.644  1.00  0.00           H
ATOM   4061  CG  GLU   250     159.623 149.547 238.409  1.00  0.00           C
ATOM   4062  HG2 GLU   250     160.091 149.995 239.288  1.00  0.00           H
ATOM   4063  HG3 GLU   250     160.351 149.554 237.596  1.00  0.00           H
ATOM   4064  CD  GLU   250     158.420 150.397 237.986  1.00  0.00           C
ATOM   4065  OE1 GLU   250     157.354 149.848 237.633  1.00  0.00           O
ATOM   4066  OE2 GLU   250     158.545 151.640 237.916  1.00  0.00           O
ATOM   4067  C   GLU   250     160.049 145.900 239.684  1.00  0.00           C
ATOM   4068  O   GLU   250     159.687 145.935 240.856  1.00  0.00           O
ATOM   4069  N   HIP   251     160.124 144.744 239.004  1.00  0.00           N
ATOM   4070  H   HIP   251     160.376 144.805 238.028  1.00  0.00           H
ATOM   4071  CA  HIP   251     160.133 143.407 239.617  1.00  0.00           C
ATOM   4072  HA  HIP   251     159.905 143.501 240.681  1.00  0.00           H
ATOM   4073  CB  HIP   251     159.037 142.531 238.979  1.00  0.00           C
ATOM   4074  HB2 HIP   251     159.293 142.324 237.939  1.00  0.00           H
ATOM   4075  HB3 HIP   251     159.024 141.569 239.496  1.00  0.00           H
ATOM   4076  CG  HIP   251     157.633 143.100 239.006  1.00  0.00           C
ATOM   4077  ND1 HIP   251     157.137 144.168 238.269  1.00  0.00           N
ATOM   4078  HD1 HIP   251     157.663 144.754 237.617  1.00  0.00           H
ATOM   4079  CE1 HIP   251     155.803 144.222 238.460  1.00  0.00           C
ATOM   4080  HE1 HIP   251     155.116 144.896 237.958  1.00  0.00           H
ATOM   4081  NE2 HIP   251     155.442 143.235 239.300  1.00  0.00           N
ATOM   4082  HE2 HIP   251     154.484 142.902 239.460  1.00  0.00           H
ATOM   4083  CD2 HIP   251     156.576 142.536 239.663  1.00  0.00           C
ATOM   4084  HD2 HIP   251     156.605 141.629 240.259  1.00  0.00           H
ATOM   4085  C   HIP   251     161.521 142.733 239.533  1.00  0.00           C
ATOM   4086  O   HIP   251     162.022 142.218 240.529  1.00  0.00           O
ATOM   4087  N   GLN   252     162.163 142.733 238.356  1.00  0.00           N
ATOM   4088  H   GLN   252     161.686 143.159 237.575  1.00  0.00           H
ATOM   4089  CA  GLN   252     163.385 141.958 238.071  1.00  0.00           C
ATOM   4090  HA  GLN   252     163.177 140.952 238.427  1.00  0.00           H
ATOM   4091  CB  GLN   252     163.606 141.811 236.544  1.00  0.00           C
ATOM   4092  HB2 GLN   252     163.781 140.752 236.343  1.00  0.00           H
ATOM   4093  HB3 GLN   252     162.687 142.077 236.022  1.00  0.00           H
ATOM   4094  CG  GLN   252     164.779 142.596 235.916  1.00  0.00           C
ATOM   4095  HG2 GLN   252     164.788 143.619 236.285  1.00  0.00           H
ATOM   4096  HG3 GLN   252     165.716 142.126 236.217  1.00  0.00           H
ATOM   4097  CD  GLN   252     164.727 142.620 234.384  1.00  0.00           C
ATOM   4098  OE1 GLN   252     164.775 143.660 233.736  1.00  0.00           O
ATOM   4099  NE2 GLN   252     164.586 141.485 233.735  1.00  0.00           N
ATOM   4100 HE21 GLN   252     164.552 141.528 232.732  1.00  0.00           H
ATOM   4101 HE22 GLN   252     164.550 140.613 234.234  1.00  0.00           H
ATOM   4102  C   GLN   252     164.643 142.405 238.846  1.00  0.00           C
ATOM   4103  O   GLN   252     165.581 141.626 238.973  1.00  0.00           O
ATOM   4104  N   GLU   253     164.671 143.623 239.396  1.00  0.00           N
ATOM   4105  H   GLU   253     163.905 144.265 239.215  1.00  0.00           H
ATOM   4106  CA  GLU   253     165.743 144.090 240.297  1.00  0.00           C
ATOM   4107  HA  GLU   253     166.717 143.854 239.866  1.00  0.00           H
ATOM   4108  CB  GLU   253     165.628 145.616 240.457  1.00  0.00           C
ATOM   4109  HB2 GLU   253     164.609 145.846 240.773  1.00  0.00           H
ATOM   4110  HB3 GLU   253     166.310 145.952 241.240  1.00  0.00           H
ATOM   4111  CG  GLU   253     165.955 146.387 239.169  1.00  0.00           C
ATOM   4112  HG2 GLU   253     167.040 146.424 239.047  1.00  0.00           H
ATOM   4113  HG3 GLU   253     165.551 145.852 238.310  1.00  0.00           H
ATOM   4114  CD  GLU   253     165.390 147.815 239.182  1.00  0.00           C
ATOM   4115  OE1 GLU   253     165.208 148.414 240.270  1.00  0.00           O
ATOM   4116  OE2 GLU   253     165.177 148.410 238.100  1.00  0.00           O
ATOM   4117  C   GLU   253     165.695 143.444 241.696  1.00  0.00           C
ATOM   4118  O   GLU   253     166.702 143.435 242.409  1.00  0.00           O
ATOM   4119  N   SER   254     164.529 142.919 242.095  1.00  0.00           N
ATOM   4120  H   SER   254     163.767 142.912 241.426  1.00  0.00           H
ATOM   4121  CA  SER   254     164.200 142.523 243.470  1.00  0.00           C
ATOM   4122  HA  SER   254     165.112 142.204 243.975  1.00  0.00           H
ATOM   4123  CB  SER   254     163.655 143.745 244.223  1.00  0.00           C
ATOM   4124  HB2 SER   254     164.402 144.541 244.205  1.00  0.00           H
ATOM   4125  HB3 SER   254     162.748 144.103 243.732  1.00  0.00           H
ATOM   4126  OG  SER   254     163.364 143.419 245.564  1.00  0.00           O
ATOM   4127  HG  SER   254     162.650 142.765 245.545  1.00  0.00           H
ATOM   4128  C   SER   254     163.228 141.331 243.488  1.00  0.00           C
ATOM   4129  O   SER   254     162.146 141.393 244.075  1.00  0.00           O
ATOM   4130  N   MET   255     163.606 140.251 242.797  1.00  0.00           N
ATOM   4131  H   MET   255     164.501 140.297 242.336  1.00  0.00           H
ATOM   4132  CA  MET   255     162.800 139.036 242.589  1.00  0.00           C
ATOM   4133  HA  MET   255     161.796 139.343 242.291  1.00  0.00           H
ATOM   4134  CB  MET   255     163.400 138.206 241.437  1.00  0.00           C
ATOM   4135  HB2 MET   255     164.419 137.918 241.695  1.00  0.00           H
ATOM   4136  HB3 MET   255     162.807 137.300 241.302  1.00  0.00           H
ATOM   4137  CG  MET   255     163.407 138.975 240.113  1.00  0.00           C
ATOM   4138  HG2 MET   255     162.378 139.241 239.872  1.00  0.00           H
ATOM   4139  HG3 MET   255     163.972 139.897 240.243  1.00  0.00           H
ATOM   4140  SD  MET   255     164.107 138.084 238.695  1.00  0.00           S
ATOM   4141  CE  MET   255     165.864 138.073 239.141  1.00  0.00           C
ATOM   4142  HE1 MET   255     166.212 139.095 239.290  1.00  0.00           H
ATOM   4143  HE2 MET   255     166.010 137.500 240.057  1.00  0.00           H
ATOM   4144  HE3 MET   255     166.437 137.611 238.338  1.00  0.00           H
ATOM   4145  C   MET   255     162.642 138.185 243.864  1.00  0.00           C
ATOM   4146  O   MET   255     163.194 137.090 243.970  1.00  0.00           O
ATOM   4147  N   ASP   256     161.894 138.686 244.847  1.00  0.00           N
ATOM   4148  H   ASP   256     161.518 139.621 244.738  1.00  0.00           H
ATOM   4149  CA  ASP   256     161.548 137.925 246.047  1.00  0.00           C
ATOM   4150  HA  ASP   256     162.458 137.446 246.413  1.00  0.00           H
ATOM   4151  CB  ASP   256     161.067 138.858 247.169  1.00  0.00           C
ATOM   4152  HB2 ASP   256     161.806 139.649 247.309  1.00  0.00           H
ATOM   4153  HB3 ASP   256     160.122 139.322 246.880  1.00  0.00           H
ATOM   4154  CG  ASP   256     160.884 138.121 248.501  1.00  0.00           C
ATOM   4155  OD1 ASP   256     161.015 136.876 248.540  1.00  0.00           O
ATOM   4156  OD2 ASP   256     160.631 138.797 249.524  1.00  0.00           O
ATOM   4157  C   ASP   256     160.531 136.813 245.726  1.00  0.00           C
ATOM   4158  O   ASP   256     159.333 137.048 245.549  1.00  0.00           O
ATOM   4159  N   MET   257     161.022 135.573 245.684  1.00  0.00           N
ATOM   4160  H   MET   257     162.020 135.474 245.800  1.00  0.00           H
ATOM   4161  CA  MET   257     160.234 134.368 245.399  1.00  0.00           C
ATOM   4162  HA  MET   257     159.723 134.518 244.447  1.00  0.00           H
ATOM   4163  CB  MET   257     161.181 133.163 245.248  1.00  0.00           C
ATOM   4164  HB2 MET   257     161.722 133.025 246.185  1.00  0.00           H
ATOM   4165  HB3 MET   257     160.598 132.261 245.056  1.00  0.00           H
ATOM   4166  CG  MET   257     162.204 133.339 244.112  1.00  0.00           C
ATOM   4167  HG2 MET   257     162.667 134.323 244.186  1.00  0.00           H
ATOM   4168  HG3 MET   257     162.999 132.605 244.251  1.00  0.00           H
ATOM   4169  SD  MET   257     161.546 133.145 242.430  1.00  0.00           S
ATOM   4170  CE  MET   257     161.939 131.399 242.137  1.00  0.00           C
ATOM   4171  HE1 MET   257     163.014 131.246 242.229  1.00  0.00           H
ATOM   4172  HE2 MET   257     161.420 130.775 242.865  1.00  0.00           H
ATOM   4173  HE3 MET   257     161.629 131.122 241.130  1.00  0.00           H
ATOM   4174  C   MET   257     159.137 134.088 246.446  1.00  0.00           C
ATOM   4175  O   MET   257     158.255 133.271 246.186  1.00  0.00           O
ATOM   4176  N   ASN   258     159.135 134.779 247.596  1.00  0.00           N
ATOM   4177  H   ASN   258     159.884 135.448 247.759  1.00  0.00           H
ATOM   4178  CA  ASN   258     158.025 134.761 248.558  1.00  0.00           C
ATOM   4179  HA  ASN   258     157.705 133.726 248.695  1.00  0.00           H
ATOM   4180  CB  ASN   258     158.501 135.298 249.924  1.00  0.00           C
ATOM   4181  HB2 ASN   258     158.835 136.329 249.819  1.00  0.00           H
ATOM   4182  HB3 ASN   258     157.658 135.295 250.615  1.00  0.00           H
ATOM   4183  CG  ASN   258     159.603 134.476 250.570  1.00  0.00           C
ATOM   4184  OD1 ASN   258     159.358 133.530 251.299  1.00  0.00           O
ATOM   4185  ND2 ASN   258     160.847 134.826 250.363  1.00  0.00           N
ATOM   4186 HD21 ASN   258     161.041 135.625 249.752  1.00  0.00           H
ATOM   4187 HD22 ASN   258     161.566 134.288 250.802  1.00  0.00           H
ATOM   4188  C   ASN   258     156.784 135.550 248.080  1.00  0.00           C
ATOM   4189  O   ASN   258     155.736 135.477 248.732  1.00  0.00           O
ATOM   4190  N   ASN   259     156.858 136.335 246.992  1.00  0.00           N
ATOM   4191  H   ASN   259     157.747 136.436 246.509  1.00  0.00           H
ATOM   4192  CA  ASN   259     155.714 137.136 246.530  1.00  0.00           C
ATOM   4193  HA  ASN   259     154.824 136.542 246.742  1.00  0.00           H
ATOM   4194  CB  ASN   259     155.636 138.424 247.389  1.00  0.00           C
ATOM   4195  HB2 ASN   259     156.319 138.357 248.237  1.00  0.00           H
ATOM   4196  HB3 ASN   259     155.925 139.309 246.823  1.00  0.00           H
ATOM   4197  CG  ASN   259     154.244 138.613 247.951  1.00  0.00           C
ATOM   4198  OD1 ASN   259     153.508 139.523 247.603  1.00  0.00           O
ATOM   4199  ND2 ASN   259     153.826 137.724 248.822  1.00  0.00           N
ATOM   4200 HD21 ASN   259     154.430 136.935 249.046  1.00  0.00           H
ATOM   4201 HD22 ASN   259     152.914 137.848 249.214  1.00  0.00           H
ATOM   4202  C   ASN   259     155.600 137.386 245.003  1.00  0.00           C
ATOM   4203  O   ASN   259     155.565 138.537 244.566  1.00  0.00           O
ATOM   4204  N   PRO   260     155.413 136.339 244.174  1.00  0.00           N
ATOM   4205  CD  PRO   260     155.708 134.938 244.425  1.00  0.00           C
ATOM   4206  HD2 PRO   260     154.908 134.491 245.016  1.00  0.00           H
ATOM   4207  HD3 PRO   260     156.669 134.815 244.920  1.00  0.00           H
ATOM   4208  CG  PRO   260     155.767 134.294 243.041  1.00  0.00           C
ATOM   4209  HG2 PRO   260     155.528 133.231 243.079  1.00  0.00           H
ATOM   4210  HG3 PRO   260     156.754 134.454 242.604  1.00  0.00           H
ATOM   4211  CB  PRO   260     154.722 135.082 242.253  1.00  0.00           C
ATOM   4212  HB2 PRO   260     153.737 134.649 242.438  1.00  0.00           H
ATOM   4213  HB3 PRO   260     154.938 135.081 241.185  1.00  0.00           H
ATOM   4214  CA  PRO   260     154.804 136.494 242.852  1.00  0.00           C
ATOM   4215  HA  PRO   260     155.457 137.113 242.235  1.00  0.00           H
ATOM   4216  C   PRO   260     153.408 137.137 242.936  1.00  0.00           C
ATOM   4217  O   PRO   260     152.626 136.844 243.846  1.00  0.00           O
ATOM   4218  N   GLN   261     153.070 137.979 241.960  1.00  0.00           N
ATOM   4219  H   GLN   261     153.802 138.228 241.297  1.00  0.00           H
ATOM   4220  CA  GLN   261     151.789 138.692 241.844  1.00  0.00           C
ATOM   4221  HA  GLN   261     151.035 138.166 242.426  1.00  0.00           H
ATOM   4222  CB  GLN   261     151.928 140.107 242.435  1.00  0.00           C
ATOM   4223  HB2 GLN   261     152.624 140.690 241.829  1.00  0.00           H
ATOM   4224  HB3 GLN   261     150.947 140.575 242.381  1.00  0.00           H
ATOM   4225  CG  GLN   261     152.396 140.128 243.904  1.00  0.00           C
ATOM   4226  HG2 GLN   261     151.806 139.415 244.479  1.00  0.00           H
ATOM   4227  HG3 GLN   261     153.440 139.827 243.953  1.00  0.00           H
ATOM   4228  CD  GLN   261     152.272 141.491 244.580  1.00  0.00           C
ATOM   4229  OE1 GLN   261     151.859 142.487 244.001  1.00  0.00           O
ATOM   4230  NE2 GLN   261     152.593 141.593 245.849  1.00  0.00           N
ATOM   4231 HE21 GLN   261     152.523 142.497 246.272  1.00  0.00           H
ATOM   4232 HE22 GLN   261     152.952 140.789 246.365  1.00  0.00           H
ATOM   4233  C   GLN   261     151.254 138.765 240.398  1.00  0.00           C
ATOM   4234  O   GLN   261     150.087 139.111 240.189  1.00  0.00           O
ATOM   4235  N   ASH   262     152.072 138.445 239.390  1.00  0.00           N
ATOM   4236  H   ASH   262     153.047 138.244 239.609  1.00  0.00           H
ATOM   4237  CA  ASH   262     151.731 138.589 237.970  1.00  0.00           C
ATOM   4238  HA  ASH   262     150.682 138.325 237.828  1.00  0.00           H
ATOM   4239  CB  ASH   262     151.892 140.068 237.569  1.00  0.00           C
ATOM   4240  HB2 ASH   262     151.812 140.175 236.496  1.00  0.00           H
ATOM   4241  HB3 ASH   262     151.083 140.640 238.013  1.00  0.00           H
ATOM   4242  CG  ASH   262     153.219 140.661 238.008  1.00  0.00           C
ATOM   4243  OD1 ASH   262     153.337 141.520 238.875  1.00  0.00           O
ATOM   4244  OD2 ASH   262     154.278 140.155 237.345  1.00  0.00           O
ATOM   4245  HD2 ASH   262     155.068 140.230 237.935  1.00  0.00           H
ATOM   4246  C   ASH   262     152.542 137.657 237.045  1.00  0.00           C
ATOM   4247  O   ASH   262     153.429 136.914 237.470  1.00  0.00           O
ATOM   4248  N   PHE   263     152.197 137.690 235.756  1.00  0.00           N
ATOM   4249  H   PHE   263     151.426 138.297 235.496  1.00  0.00           H
ATOM   4250  CA  PHE   263     152.759 136.868 234.685  1.00  0.00           C
ATOM   4251  HA  PHE   263     152.529 135.820 234.884  1.00  0.00           H
ATOM   4252  CB  PHE   263     152.056 137.285 233.382  1.00  0.00           C
ATOM   4253  HB2 PHE   263     150.978 137.279 233.554  1.00  0.00           H
ATOM   4254  HB3 PHE   263     152.336 138.313 233.152  1.00  0.00           H
ATOM   4255  CG  PHE   263     152.331 136.433 232.156  1.00  0.00           C
ATOM   4256  CD1 PHE   263     151.438 135.401 231.807  1.00  0.00           C
ATOM   4257  HD1 PHE   263     150.589 135.177 232.438  1.00  0.00           H
ATOM   4258  CE1 PHE   263     151.628 134.671 230.620  1.00  0.00           C
ATOM   4259  HE1 PHE   263     150.930 133.890 230.352  1.00  0.00           H
ATOM   4260  CZ  PHE   263     152.717 134.964 229.781  1.00  0.00           C
ATOM   4261  HZ  PHE   263     152.853 134.406 228.864  1.00  0.00           H
ATOM   4262  CE2 PHE   263     153.621 135.982 230.133  1.00  0.00           C
ATOM   4263  HE2 PHE   263     154.457 136.212 229.485  1.00  0.00           H
ATOM   4264  CD2 PHE   263     153.427 136.718 231.317  1.00  0.00           C
ATOM   4265  HD2 PHE   263     154.114 137.513 231.569  1.00  0.00           H
ATOM   4266  C   PHE   263     154.285 137.000 234.563  1.00  0.00           C
ATOM   4267  O   PHE   263     154.952 135.987 234.376  1.00  0.00           O
ATOM   4268  N   ILE   264     154.846 138.210 234.715  1.00  0.00           N
ATOM   4269  H   ILE   264     154.246 138.992 234.942  1.00  0.00           H
ATOM   4270  CA  ILE   264     156.296 138.462 234.593  1.00  0.00           C
ATOM   4271  HA  ILE   264     156.625 138.131 233.607  1.00  0.00           H
ATOM   4272  CB  ILE   264     156.614 139.976 234.735  1.00  0.00           C
ATOM   4273  HB  ILE   264     156.243 140.304 235.704  1.00  0.00           H
ATOM   4274  CG2 ILE   264     158.133 140.238 234.718  1.00  0.00           C
ATOM   4275 HG21 ILE   264     158.612 139.737 235.558  1.00  0.00           H
ATOM   4276 HG22 ILE   264     158.337 141.301 234.824  1.00  0.00           H
ATOM   4277 HG23 ILE   264     158.569 139.874 233.787  1.00  0.00           H
ATOM   4278  CG1 ILE   264     155.926 140.832 233.644  1.00  0.00           C
ATOM   4279 HG12 ILE   264     156.468 140.741 232.703  1.00  0.00           H
ATOM   4280 HG13 ILE   264     154.913 140.470 233.474  1.00  0.00           H
ATOM   4281  CD1 ILE   264     155.819 142.318 234.014  1.00  0.00           C
ATOM   4282 HD11 ILE   264     155.316 142.430 234.975  1.00  0.00           H
ATOM   4283 HD12 ILE   264     155.245 142.837 233.247  1.00  0.00           H
ATOM   4284 HD13 ILE   264     156.804 142.774 234.079  1.00  0.00           H
ATOM   4285  C   ILE   264     157.075 137.635 235.627  1.00  0.00           C
ATOM   4286  O   ILE   264     158.001 136.908 235.276  1.00  0.00           O
ATOM   4287  N   ASP   265     156.674 137.710 236.896  1.00  0.00           N
ATOM   4288  H   ASP   265     155.931 138.359 237.119  1.00  0.00           H
ATOM   4289  CA  ASP   265     157.341 137.028 238.015  1.00  0.00           C
ATOM   4290  HA  ASP   265     158.398 137.293 237.998  1.00  0.00           H
ATOM   4291  CB  ASP   265     156.763 137.448 239.388  1.00  0.00           C
ATOM   4292  HB2 ASP   265     156.114 136.652 239.755  1.00  0.00           H
ATOM   4293  HB3 ASP   265     157.588 137.534 240.096  1.00  0.00           H
ATOM   4294  CG  ASP   265     155.955 138.748 239.414  1.00  0.00           C
ATOM   4295  OD1 ASP   265     156.351 139.754 238.781  1.00  0.00           O
ATOM   4296  OD2 ASP   265     154.853 138.732 239.998  1.00  0.00           O
ATOM   4297  C   ASP   265     157.232 135.506 237.866  1.00  0.00           C
ATOM   4298  O   ASP   265     158.206 134.780 238.056  1.00  0.00           O
ATOM   4299  N   CYS   266     156.052 135.021 237.470  1.00  0.00           N
ATOM   4300  H   CYS   266     155.291 135.676 237.327  1.00  0.00           H
ATOM   4301  CA  CYS   266     155.816 133.601 237.226  1.00  0.00           C
ATOM   4302  HA  CYS   266     156.142 133.045 238.105  1.00  0.00           H
ATOM   4303  CB  CYS   266     154.302 133.410 237.067  1.00  0.00           C
ATOM   4304  HB2 CYS   266     153.785 133.892 237.899  1.00  0.00           H
ATOM   4305  HB3 CYS   266     153.967 133.866 236.133  1.00  0.00           H
ATOM   4306  SG  CYS   266     153.896 131.643 237.069  1.00  0.00           S
ATOM   4307  HG  CYS   266     154.337 131.385 238.306  1.00  0.00           H
ATOM   4308  C   CYS   266     156.638 133.076 236.027  1.00  0.00           C
ATOM   4309  O   CYS   266     157.150 131.957 236.064  1.00  0.00           O
ATOM   4310  N   PHE   267     156.838 133.893 234.988  1.00  0.00           N
ATOM   4311  H   PHE   267     156.377 134.798 234.988  1.00  0.00           H
ATOM   4312  CA  PHE   267     157.670 133.555 233.828  1.00  0.00           C
ATOM   4313  HA  PHE   267     157.384 132.566 233.467  1.00  0.00           H
ATOM   4314  CB  PHE   267     157.386 134.573 232.716  1.00  0.00           C
ATOM   4315  HB2 PHE   267     156.309 134.732 232.668  1.00  0.00           H
ATOM   4316  HB3 PHE   267     157.838 135.530 232.977  1.00  0.00           H
ATOM   4317  CG  PHE   267     157.841 134.185 231.323  1.00  0.00           C
ATOM   4318  CD1 PHE   267     159.205 134.201 230.972  1.00  0.00           C
ATOM   4319  HD1 PHE   267     159.958 134.430 231.712  1.00  0.00           H
ATOM   4320  CE1 PHE   267     159.594 133.960 229.644  1.00  0.00           C
ATOM   4321  HE1 PHE   267     160.639 134.010 229.375  1.00  0.00           H
ATOM   4322  CZ  PHE   267     158.626 133.689 228.661  1.00  0.00           C
ATOM   4323  HZ  PHE   267     158.926 133.519 227.637  1.00  0.00           H
ATOM   4324  CE2 PHE   267     157.266 133.651 229.013  1.00  0.00           C
ATOM   4325  HE2 PHE   267     156.512 133.447 228.269  1.00  0.00           H
ATOM   4326  CD2 PHE   267     156.877 133.903 230.337  1.00  0.00           C
ATOM   4327  HD2 PHE   267     155.827 133.906 230.589  1.00  0.00           H
ATOM   4328  C   PHE   267     159.160 133.508 234.201  1.00  0.00           C
ATOM   4329  O   PHE   267     159.868 132.587 233.797  1.00  0.00           O
ATOM   4330  N   LEU   268     159.631 134.443 235.033  1.00  0.00           N
ATOM   4331  H   LEU   268     159.003 135.193 235.309  1.00  0.00           H
ATOM   4332  CA  LEU   268     160.986 134.428 235.603  1.00  0.00           C
ATOM   4333  HA  LEU   268     161.705 134.328 234.790  1.00  0.00           H
ATOM   4334  CB  LEU   268     161.241 135.765 236.327  1.00  0.00           C
ATOM   4335  HB2 LEU   268     160.438 135.921 237.048  1.00  0.00           H
ATOM   4336  HB3 LEU   268     162.175 135.699 236.887  1.00  0.00           H
ATOM   4337  CG  LEU   268     161.312 136.984 235.381  1.00  0.00           C
ATOM   4338  HG  LEU   268     160.514 136.934 234.643  1.00  0.00           H
ATOM   4339  CD1 LEU   268     161.148 138.288 236.163  1.00  0.00           C
ATOM   4340 HD11 LEU   268     160.191 138.277 236.684  1.00  0.00           H
ATOM   4341 HD12 LEU   268     161.165 139.134 235.478  1.00  0.00           H
ATOM   4342 HD13 LEU   268     161.949 138.391 236.892  1.00  0.00           H
ATOM   4343  CD2 LEU   268     162.645 137.048 234.634  1.00  0.00           C
ATOM   4344 HD21 LEU   268     163.471 137.083 235.344  1.00  0.00           H
ATOM   4345 HD22 LEU   268     162.752 136.172 233.994  1.00  0.00           H
ATOM   4346 HD23 LEU   268     162.667 137.936 234.005  1.00  0.00           H
ATOM   4347  C   LEU   268     161.202 133.215 236.532  1.00  0.00           C
ATOM   4348  O   LEU   268     162.249 132.573 236.475  1.00  0.00           O
ATOM   4349  N   MET   269     160.188 132.826 237.311  1.00  0.00           N
ATOM   4350  H   MET   269     159.381 133.439 237.384  1.00  0.00           H
ATOM   4351  CA  MET   269     160.183 131.576 238.084  1.00  0.00           C
ATOM   4352  HA  MET   269     161.087 131.550 238.694  1.00  0.00           H
ATOM   4353  CB  MET   269     158.974 131.602 239.035  1.00  0.00           C
ATOM   4354  HB2 MET   269     159.081 132.461 239.697  1.00  0.00           H
ATOM   4355  HB3 MET   269     158.062 131.734 238.457  1.00  0.00           H
ATOM   4356  CG  MET   269     158.816 130.337 239.885  1.00  0.00           C
ATOM   4357  HG2 MET   269     158.622 129.495 239.220  1.00  0.00           H
ATOM   4358  HG3 MET   269     159.747 130.138 240.415  1.00  0.00           H
ATOM   4359  SD  MET   269     157.461 130.415 241.092  1.00  0.00           S
ATOM   4360  CE  MET   269     158.161 131.546 242.328  1.00  0.00           C
ATOM   4361  HE1 MET   269     159.090 131.133 242.719  1.00  0.00           H
ATOM   4362  HE2 MET   269     158.358 132.520 241.879  1.00  0.00           H
ATOM   4363  HE3 MET   269     157.457 131.668 243.151  1.00  0.00           H
ATOM   4364  C   MET   269     160.219 130.323 237.183  1.00  0.00           C
ATOM   4365  O   MET   269     160.852 129.331 237.541  1.00  0.00           O
ATOM   4366  N   LYS   270     159.621 130.367 235.983  1.00  0.00           N
ATOM   4367  H   LYS   270     159.040 131.174 235.778  1.00  0.00           H
ATOM   4368  CA  LYS   270     159.793 129.337 234.937  1.00  0.00           C
ATOM   4369  HA  LYS   270     159.628 128.363 235.399  1.00  0.00           H
ATOM   4370  CB  LYS   270     158.756 129.554 233.811  1.00  0.00           C
ATOM   4371  HB2 LYS   270     157.981 130.235 234.165  1.00  0.00           H
ATOM   4372  HB3 LYS   270     159.226 130.033 232.951  1.00  0.00           H
ATOM   4373  CG  LYS   270     158.035 128.272 233.359  1.00  0.00           C
ATOM   4374  HG2 LYS   270     157.527 127.844 234.224  1.00  0.00           H
ATOM   4375  HG3 LYS   270     157.268 128.558 232.639  1.00  0.00           H
ATOM   4376  CD  LYS   270     158.896 127.174 232.714  1.00  0.00           C
ATOM   4377  HD2 LYS   270     159.662 126.834 233.413  1.00  0.00           H
ATOM   4378  HD3 LYS   270     158.242 126.328 232.498  1.00  0.00           H
ATOM   4379  CE  LYS   270     159.557 127.637 231.411  1.00  0.00           C
ATOM   4380  HE2 LYS   270     158.836 128.209 230.823  1.00  0.00           H
ATOM   4381  HE3 LYS   270     160.397 128.295 231.653  1.00  0.00           H
ATOM   4382  NZ  LYS   270     160.037 126.490 230.610  1.00  0.00           N
ATOM   4383  HZ1 LYS   270     160.682 125.910 231.144  1.00  0.00           H
ATOM   4384  HZ2 LYS   270     160.597 126.806 229.810  1.00  0.00           H
ATOM   4385  HZ3 LYS   270     159.296 125.914 230.253  1.00  0.00           H
ATOM   4386  C   LYS   270     161.225 129.325 234.381  1.00  0.00           C
ATOM   4387  O   LYS   270     161.781 128.253 234.156  1.00  0.00           O
ATOM   4388  N   MET   271     161.823 130.501 234.182  1.00  0.00           N
ATOM   4389  H   MET   271     161.267 131.332 234.351  1.00  0.00           H
ATOM   4390  CA  MET   271     163.174 130.684 233.633  1.00  0.00           C
ATOM   4391  HA  MET   271     163.214 130.170 232.675  1.00  0.00           H
ATOM   4392  CB  MET   271     163.399 132.180 233.358  1.00  0.00           C
ATOM   4393  HB2 MET   271     162.544 132.576 232.808  1.00  0.00           H
ATOM   4394  HB3 MET   271     163.473 132.706 234.306  1.00  0.00           H
ATOM   4395  CG  MET   271     164.662 132.472 232.539  1.00  0.00           C
ATOM   4396  HG2 MET   271     165.529 132.034 233.035  1.00  0.00           H
ATOM   4397  HG3 MET   271     164.554 131.998 231.563  1.00  0.00           H
ATOM   4398  SD  MET   271     164.987 134.241 232.278  1.00  0.00           S
ATOM   4399  CE  MET   271     165.475 134.742 233.952  1.00  0.00           C
ATOM   4400  HE1 MET   271     166.324 134.143 234.282  1.00  0.00           H
ATOM   4401  HE2 MET   271     165.759 135.795 233.945  1.00  0.00           H
ATOM   4402  HE3 MET   271     164.644 134.603 234.643  1.00  0.00           H
ATOM   4403  C   MET   271     164.280 130.082 234.525  1.00  0.00           C
ATOM   4404  O   MET   271     165.274 129.576 234.004  1.00  0.00           O
ATOM   4405  N   GLU   272     164.087 130.031 235.849  1.00  0.00           N
ATOM   4406  H   GLU   272     163.290 130.527 236.232  1.00  0.00           H
ATOM   4407  CA  GLU   272     164.984 129.323 236.786  1.00  0.00           C
ATOM   4408  HA  GLU   272     165.965 129.800 236.760  1.00  0.00           H
ATOM   4409  CB  GLU   272     164.426 129.461 238.222  1.00  0.00           C
ATOM   4410  HB2 GLU   272     164.584 130.491 238.545  1.00  0.00           H
ATOM   4411  HB3 GLU   272     163.350 129.296 238.194  1.00  0.00           H
ATOM   4412  CG  GLU   272     164.995 128.516 239.303  1.00  0.00           C
ATOM   4413  HG2 GLU   272     164.658 128.866 240.281  1.00  0.00           H
ATOM   4414  HG3 GLU   272     164.562 127.526 239.146  1.00  0.00           H
ATOM   4415  CD  GLU   272     166.526 128.390 239.311  1.00  0.00           C
ATOM   4416  OE1 GLU   272     167.223 129.334 238.876  1.00  0.00           O
ATOM   4417  OE2 GLU   272     167.054 127.301 239.638  1.00  0.00           O
ATOM   4418  C   GLU   272     165.193 127.849 236.389  1.00  0.00           C
ATOM   4419  O   GLU   272     166.332 127.377 236.328  1.00  0.00           O
ATOM   4420  N   LYS   273     164.112 127.140 236.030  1.00  0.00           N
ATOM   4421  H   LYS   273     163.217 127.616 236.040  1.00  0.00           H
ATOM   4422  CA  LYS   273     164.159 125.755 235.518  1.00  0.00           C
ATOM   4423  HA  LYS   273     165.049 125.280 235.935  1.00  0.00           H
ATOM   4424  CB  LYS   273     162.937 124.948 236.010  1.00  0.00           C
ATOM   4425  HB2 LYS   273     162.033 125.335 235.535  1.00  0.00           H
ATOM   4426  HB3 LYS   273     163.067 123.911 235.700  1.00  0.00           H
ATOM   4427  CG  LYS   273     162.759 124.992 237.544  1.00  0.00           C
ATOM   4428  HG2 LYS   273     163.727 124.860 238.030  1.00  0.00           H
ATOM   4429  HG3 LYS   273     162.379 125.978 237.817  1.00  0.00           H
ATOM   4430  CD  LYS   273     161.779 123.932 238.086  1.00  0.00           C
ATOM   4431  HD2 LYS   273     161.451 124.245 239.079  1.00  0.00           H
ATOM   4432  HD3 LYS   273     160.906 123.877 237.434  1.00  0.00           H
ATOM   4433  CE  LYS   273     162.451 122.554 238.204  1.00  0.00           C
ATOM   4434  HE2 LYS   273     162.861 122.276 237.230  1.00  0.00           H
ATOM   4435  HE3 LYS   273     163.290 122.639 238.903  1.00  0.00           H
ATOM   4436  NZ  LYS   273     161.524 121.492 238.677  1.00  0.00           N
ATOM   4437  HZ1 LYS   273     161.102 121.692 239.583  1.00  0.00           H
ATOM   4438  HZ2 LYS   273     162.039 120.624 238.820  1.00  0.00           H
ATOM   4439  HZ3 LYS   273     160.777 121.309 238.024  1.00  0.00           H
ATOM   4440  C   LYS   273     164.356 125.672 233.991  1.00  0.00           C
ATOM   4441  O   LYS   273     164.239 124.586 233.415  1.00  0.00           O
ATOM   4442  N   GLU   274     164.626 126.802 233.331  1.00  0.00           N
ATOM   4443  H   GLU   274     164.649 127.657 233.869  1.00  0.00           H
ATOM   4444  CA  GLU   274     164.989 126.889 231.907  1.00  0.00           C
ATOM   4445  HA  GLU   274     164.702 125.957 231.434  1.00  0.00           H
ATOM   4446  CB  GLU   274     164.202 128.019 231.233  1.00  0.00           C
ATOM   4447  HB2 GLU   274     163.217 128.123 231.692  1.00  0.00           H
ATOM   4448  HB3 GLU   274     164.744 128.956 231.358  1.00  0.00           H
ATOM   4449  CG  GLU   274     164.017 127.740 229.740  1.00  0.00           C
ATOM   4450  HG2 GLU   274     163.869 128.691 229.224  1.00  0.00           H
ATOM   4451  HG3 GLU   274     164.908 127.259 229.345  1.00  0.00           H
ATOM   4452  CD  GLU   274     162.820 126.832 229.485  1.00  0.00           C
ATOM   4453  OE1 GLU   274     162.704 125.769 230.133  1.00  0.00           O
ATOM   4454  OE2 GLU   274     161.902 127.257 228.756  1.00  0.00           O
ATOM   4455  C   GLU   274     166.503 127.047 231.674  1.00  0.00           C
ATOM   4456  O   GLU   274     167.050 126.599 230.661  1.00  0.00           O
ATOM   4457  N   LYS   275     167.225 127.557 232.678  1.00  0.00           N
ATOM   4458  H   LYS   275     166.714 127.968 233.452  1.00  0.00           H
ATOM   4459  CA  LYS   275     168.615 127.143 232.903  1.00  0.00           C
ATOM   4460  HA  LYS   275     169.210 127.476 232.052  1.00  0.00           H
ATOM   4461  CB  LYS   275     169.148 127.843 234.169  1.00  0.00           C
ATOM   4462  HB2 LYS   275     169.510 128.833 233.887  1.00  0.00           H
ATOM   4463  HB3 LYS   275     168.319 127.983 234.861  1.00  0.00           H
ATOM   4464  CG  LYS   275     170.265 127.084 234.904  1.00  0.00           C
ATOM   4465  HG2 LYS   275     169.846 126.162 235.306  1.00  0.00           H
ATOM   4466  HG3 LYS   275     171.054 126.825 234.197  1.00  0.00           H
ATOM   4467  CD  LYS   275     170.902 127.866 236.064  1.00  0.00           C
ATOM   4468  HD2 LYS   275     171.530 127.178 236.635  1.00  0.00           H
ATOM   4469  HD3 LYS   275     171.554 128.635 235.647  1.00  0.00           H
ATOM   4470  CE  LYS   275     169.916 128.550 237.021  1.00  0.00           C
ATOM   4471  HE2 LYS   275     170.479 128.975 237.857  1.00  0.00           H
ATOM   4472  HE3 LYS   275     169.418 129.375 236.505  1.00  0.00           H
ATOM   4473  NZ  LYS   275     168.890 127.630 237.553  1.00  0.00           N
ATOM   4474  HZ1 LYS   275     169.261 126.800 238.008  1.00  0.00           H
ATOM   4475  HZ2 LYS   275     168.185 127.358 236.875  1.00  0.00           H
ATOM   4476  HZ3 LYS   275     168.341 128.100 238.281  1.00  0.00           H
ATOM   4477  C   LYS   275     168.674 125.602 232.928  1.00  0.00           C
ATOM   4478  O   LYS   275     167.732 124.933 233.350  1.00  0.00           O
ATOM   4479  N   HID   276     169.766 125.045 232.406  1.00  0.00           N
ATOM   4480  H   HID   276     170.500 125.676 232.130  1.00  0.00           H
ATOM   4481  CA  HID   276     169.928 123.631 232.024  1.00  0.00           C
ATOM   4482  HA  HID   276     170.964 123.526 231.700  1.00  0.00           H
ATOM   4483  CB  HID   276     169.778 122.689 233.238  1.00  0.00           C
ATOM   4484  HB2 HID   276     168.718 122.532 233.440  1.00  0.00           H
ATOM   4485  HB3 HID   276     170.206 121.719 232.981  1.00  0.00           H
ATOM   4486  CG  HID   276     170.437 123.185 234.508  1.00  0.00           C
ATOM   4487  ND1 HID   276     169.834 123.308 235.740  1.00  0.00           N
ATOM   4488  HD1 HID   276     168.876 123.080 235.964  1.00  0.00           H
ATOM   4489  CE1 HID   276     170.741 123.787 236.608  1.00  0.00           C
ATOM   4490  HE1 HID   276     170.554 123.993 237.657  1.00  0.00           H
ATOM   4491  NE2 HID   276     171.915 123.988 235.988  1.00  0.00           N
ATOM   4492  CD2 HID   276     171.738 123.587 234.660  1.00  0.00           C
ATOM   4493  HD2 HID   276     172.494 123.604 233.888  1.00  0.00           H
ATOM   4494  C   HID   276     169.079 123.197 230.806  1.00  0.00           C
ATOM   4495  O   HID   276     169.643 122.610 229.886  1.00  0.00           O
ATOM   4496  N   ASN   277     167.791 123.558 230.709  1.00  0.00           N
ATOM   4497  H   ASN   277     167.385 124.062 231.490  1.00  0.00           H
ATOM   4498  CA  ASN   277     166.955 123.384 229.498  1.00  0.00           C
ATOM   4499  HA  ASN   277     167.205 122.415 229.059  1.00  0.00           H
ATOM   4500  CB  ASN   277     165.463 123.326 229.877  1.00  0.00           C
ATOM   4501  HB2 ASN   277     165.205 124.179 230.494  1.00  0.00           H
ATOM   4502  HB3 ASN   277     164.854 123.378 228.975  1.00  0.00           H
ATOM   4503  CG  ASN   277     165.089 122.038 230.579  1.00  0.00           C
ATOM   4504  OD1 ASN   277     165.115 120.961 229.996  1.00  0.00           O
ATOM   4505  ND2 ASN   277     164.734 122.097 231.842  1.00  0.00           N
ATOM   4506 HD21 ASN   277     164.676 122.989 232.322  1.00  0.00           H
ATOM   4507 HD22 ASN   277     164.459 121.235 232.273  1.00  0.00           H
ATOM   4508  C   ASN   277     167.266 124.417 228.385  1.00  0.00           C
ATOM   4509  O   ASN   277     166.390 125.061 227.804  1.00  0.00           O
ATOM   4510  N   GLN   278     168.551 124.580 228.074  1.00  0.00           N
ATOM   4511  H   GLN   278     169.203 123.946 228.519  1.00  0.00           H
ATOM   4512  CA  GLN   278     169.026 125.341 226.916  1.00  0.00           C
ATOM   4513  HA  GLN   278     168.598 126.339 226.956  1.00  0.00           H
ATOM   4514  CB  GLN   278     170.558 125.463 227.002  1.00  0.00           C
ATOM   4515  HB2 GLN   278     170.995 124.469 226.894  1.00  0.00           H
ATOM   4516  HB3 GLN   278     170.913 126.077 226.174  1.00  0.00           H
ATOM   4517  CG  GLN   278     171.065 126.072 228.326  1.00  0.00           C
ATOM   4518  HG2 GLN   278     170.742 125.471 229.176  1.00  0.00           H
ATOM   4519  HG3 GLN   278     172.155 126.059 228.314  1.00  0.00           H
ATOM   4520  CD  GLN   278     170.611 127.514 228.517  1.00  0.00           C
ATOM   4521  OE1 GLN   278     171.308 128.443 228.150  1.00  0.00           O
ATOM   4522  NE2 GLN   278     169.444 127.764 229.070  1.00  0.00           N
ATOM   4523 HE21 GLN   278     169.101 128.706 228.926  1.00  0.00           H
ATOM   4524 HE22 GLN   278     168.796 127.038 229.344  1.00  0.00           H
ATOM   4525  C   GLN   278     168.577 124.641 225.611  1.00  0.00           C
ATOM   4526  O   GLN   278     168.559 123.410 225.593  1.00  0.00           O
ATOM   4527  N   PRO   279     168.230 125.358 224.515  1.00  0.00           N
ATOM   4528  CD  PRO   279     167.961 124.705 223.239  1.00  0.00           C
ATOM   4529  HD2 PRO   279     166.884 124.672 223.068  1.00  0.00           H
ATOM   4530  HD3 PRO   279     168.375 123.696 223.190  1.00  0.00           H
ATOM   4531  CG  PRO   279     168.632 125.583 222.192  1.00  0.00           C
ATOM   4532  HG2 PRO   279     168.199 125.439 221.201  1.00  0.00           H
ATOM   4533  HG3 PRO   279     169.707 125.396 222.182  1.00  0.00           H
ATOM   4534  CB  PRO   279     168.346 126.975 222.745  1.00  0.00           C
ATOM   4535  HB2 PRO   279     167.346 127.279 222.431  1.00  0.00           H
ATOM   4536  HB3 PRO   279     169.083 127.701 222.400  1.00  0.00           H
ATOM   4537  CA  PRO   279     168.395 126.802 224.274  1.00  0.00           C
ATOM   4538  HA  PRO   279     169.392 127.085 224.610  1.00  0.00           H
ATOM   4539  C   PRO   279     167.396 127.771 224.940  1.00  0.00           C
ATOM   4540  O   PRO   279     167.437 128.956 224.620  1.00  0.00           O
ATOM   4541  N   SER   280     166.516 127.315 225.842  1.00  0.00           N
ATOM   4542  H   SER   280     166.523 126.329 226.075  1.00  0.00           H
ATOM   4543  CA  SER   280     165.670 128.168 226.702  1.00  0.00           C
ATOM   4544  HA  SER   280     164.946 127.500 227.165  1.00  0.00           H
ATOM   4545  CB  SER   280     166.500 128.779 227.849  1.00  0.00           C
ATOM   4546  HB2 SER   280     165.866 129.442 228.438  1.00  0.00           H
ATOM   4547  HB3 SER   280     166.845 127.973 228.493  1.00  0.00           H
ATOM   4548  OG  SER   280     167.628 129.510 227.410  1.00  0.00           O
ATOM   4549  HG  SER   280     167.363 129.973 226.599  1.00  0.00           H
ATOM   4550  C   SER   280     164.835 129.227 225.963  1.00  0.00           C
ATOM   4551  O   SER   280     165.126 130.422 226.018  1.00  0.00           O
ATOM   4552  N   GLU   281     163.765 128.805 225.279  1.00  0.00           N
ATOM   4553  H   GLU   281     163.509 127.827 225.314  1.00  0.00           H
ATOM   4554  CA  GLU   281     162.926 129.719 224.483  1.00  0.00           C
ATOM   4555  HA  GLU   281     163.606 130.376 223.938  1.00  0.00           H
ATOM   4556  CB  GLU   281     162.140 128.915 223.433  1.00  0.00           C
ATOM   4557  HB2 GLU   281     162.821 128.177 223.007  1.00  0.00           H
ATOM   4558  HB3 GLU   281     161.312 128.395 223.912  1.00  0.00           H
ATOM   4559  CG  GLU   281     161.598 129.785 222.286  1.00  0.00           C
ATOM   4560  HG2 GLU   281     160.662 130.253 222.599  1.00  0.00           H
ATOM   4561  HG3 GLU   281     162.318 130.581 222.079  1.00  0.00           H
ATOM   4562  CD  GLU   281     161.368 128.995 220.987  1.00  0.00           C
ATOM   4563  OE1 GLU   281     161.045 127.786 221.042  1.00  0.00           O
ATOM   4564  OE2 GLU   281     161.475 129.611 219.903  1.00  0.00           O
ATOM   4565  C   GLU   281     162.035 130.653 225.333  1.00  0.00           C
ATOM   4566  O   GLU   281     161.577 131.686 224.838  1.00  0.00           O
ATOM   4567  N   PHE   282     161.883 130.376 226.637  1.00  0.00           N
ATOM   4568  H   PHE   282     162.244 129.490 226.968  1.00  0.00           H
ATOM   4569  CA  PHE   282     161.423 131.328 227.666  1.00  0.00           C
ATOM   4570  HA  PHE   282     160.546 131.845 227.278  1.00  0.00           H
ATOM   4571  CB  PHE   282     160.988 130.571 228.938  1.00  0.00           C
ATOM   4572  HB2 PHE   282     161.728 129.810 229.177  1.00  0.00           H
ATOM   4573  HB3 PHE   282     160.979 131.265 229.778  1.00  0.00           H
ATOM   4574  CG  PHE   282     159.608 129.939 228.882  1.00  0.00           C
ATOM   4575  CD1 PHE   282     158.571 130.472 229.673  1.00  0.00           C
ATOM   4576  HD1 PHE   282     158.752 131.339 230.293  1.00  0.00           H
ATOM   4577  CE1 PHE   282     157.294 129.890 229.659  1.00  0.00           C
ATOM   4578  HE1 PHE   282     156.506 130.327 230.254  1.00  0.00           H
ATOM   4579  CZ  PHE   282     157.053 128.753 228.869  1.00  0.00           C
ATOM   4580  HZ  PHE   282     156.079 128.292 228.839  1.00  0.00           H
ATOM   4581  CE2 PHE   282     158.082 128.212 228.088  1.00  0.00           C
ATOM   4582  HE2 PHE   282     157.889 127.338 227.487  1.00  0.00           H
ATOM   4583  CD2 PHE   282     159.354 128.810 228.079  1.00  0.00           C
ATOM   4584  HD2 PHE   282     160.136 128.389 227.462  1.00  0.00           H
ATOM   4585  C   PHE   282     162.473 132.430 227.960  1.00  0.00           C
ATOM   4586  O   PHE   282     162.818 132.711 229.107  1.00  0.00           O
ATOM   4587  N   THR   283     162.983 133.079 226.913  1.00  0.00           N
ATOM   4588  H   THR   283     162.656 132.796 225.998  1.00  0.00           H
ATOM   4589  CA  THR   283     163.782 134.308 227.015  1.00  0.00           C
ATOM   4590  HA  THR   283     164.432 134.216 227.885  1.00  0.00           H
ATOM   4591  CB  THR   283     164.704 134.457 225.792  1.00  0.00           C
ATOM   4592  HB  THR   283     165.353 133.581 225.740  1.00  0.00           H
ATOM   4593  CG2 THR   283     163.973 134.602 224.458  1.00  0.00           C
ATOM   4594 HG21 THR   283     163.282 135.441 224.490  1.00  0.00           H
ATOM   4595 HG22 THR   283     163.421 133.688 224.241  1.00  0.00           H
ATOM   4596 HG23 THR   283     164.694 134.760 223.656  1.00  0.00           H
ATOM   4597  OG1 THR   283     165.516 135.602 225.927  1.00  0.00           O
ATOM   4598  HG1 THR   283     166.263 135.486 225.332  1.00  0.00           H
ATOM   4599  C   THR   283     162.892 135.540 227.246  1.00  0.00           C
ATOM   4600  O   THR   283     161.686 135.519 226.988  1.00  0.00           O
ATOM   4601  N   ILE   284     163.486 136.642 227.714  1.00  0.00           N
ATOM   4602  H   ILE   284     164.487 136.603 227.839  1.00  0.00           H
ATOM   4603  CA  ILE   284     162.786 137.904 228.018  1.00  0.00           C
ATOM   4604  HA  ILE   284     161.969 137.679 228.702  1.00  0.00           H
ATOM   4605  CB  ILE   284     163.748 138.891 228.727  1.00  0.00           C
ATOM   4606  HB  ILE   284     164.544 139.141 228.023  1.00  0.00           H
ATOM   4607  CG2 ILE   284     163.046 140.209 229.106  1.00  0.00           C
ATOM   4608 HG21 ILE   284     162.762 140.760 228.209  1.00  0.00           H
ATOM   4609 HG22 ILE   284     163.718 140.842 229.685  1.00  0.00           H
ATOM   4610 HG23 ILE   284     162.144 140.010 229.685  1.00  0.00           H
ATOM   4611  CG1 ILE   284     164.428 138.283 229.979  1.00  0.00           C
ATOM   4612 HG12 ILE   284     165.061 137.449 229.676  1.00  0.00           H
ATOM   4613 HG13 ILE   284     165.090 139.034 230.414  1.00  0.00           H
ATOM   4614  CD1 ILE   284     163.477 137.788 231.079  1.00  0.00           C
ATOM   4615 HD11 ILE   284     162.854 138.605 231.442  1.00  0.00           H
ATOM   4616 HD12 ILE   284     164.068 137.402 231.910  1.00  0.00           H
ATOM   4617 HD13 ILE   284     162.845 136.984 230.703  1.00  0.00           H
ATOM   4618  C   ILE   284     162.141 138.531 226.768  1.00  0.00           C
ATOM   4619  O   ILE   284     161.109 139.187 226.879  1.00  0.00           O
ATOM   4620  N   GLU   285     162.686 138.280 225.570  1.00  0.00           N
ATOM   4621  H   GLU   285     163.523 137.718 225.533  1.00  0.00           H
ATOM   4622  CA  GLU   285     162.035 138.676 224.311  1.00  0.00           C
ATOM   4623  HA  GLU   285     161.877 139.756 224.335  1.00  0.00           H
ATOM   4624  CB  GLU   285     162.945 138.333 223.110  1.00  0.00           C
ATOM   4625  HB2 GLU   285     163.986 138.355 223.437  1.00  0.00           H
ATOM   4626  HB3 GLU   285     162.739 137.314 222.784  1.00  0.00           H
ATOM   4627  CG  GLU   285     162.838 139.270 221.893  1.00  0.00           C
ATOM   4628  HG2 GLU   285     163.422 140.167 222.113  1.00  0.00           H
ATOM   4629  HG3 GLU   285     163.312 138.784 221.038  1.00  0.00           H
ATOM   4630  CD  GLU   285     161.414 139.700 221.519  1.00  0.00           C
ATOM   4631  OE1 GLU   285     160.991 140.780 221.992  1.00  0.00           O
ATOM   4632  OE2 GLU   285     160.758 138.990 220.721  1.00  0.00           O
ATOM   4633  C   GLU   285     160.654 138.008 224.204  1.00  0.00           C
ATOM   4634  O   GLU   285     159.640 138.699 224.150  1.00  0.00           O
ATOM   4635  N   SER   286     160.604 136.674 224.301  1.00  0.00           N
ATOM   4636  H   SER   286     161.467 136.157 224.367  1.00  0.00           H
ATOM   4637  CA  SER   286     159.372 135.876 224.281  1.00  0.00           C
ATOM   4638  HA  SER   286     158.877 136.010 223.320  1.00  0.00           H
ATOM   4639  CB  SER   286     159.701 134.387 224.450  1.00  0.00           C
ATOM   4640  HB2 SER   286     159.988 134.195 225.485  1.00  0.00           H
ATOM   4641  HB3 SER   286     158.811 133.802 224.221  1.00  0.00           H
ATOM   4642  OG  SER   286     160.758 133.969 223.608  1.00  0.00           O
ATOM   4643  HG  SER   286     161.034 133.084 223.917  1.00  0.00           H
ATOM   4644  C   SER   286     158.389 136.277 225.387  1.00  0.00           C
ATOM   4645  O   SER   286     157.186 136.302 225.138  1.00  0.00           O
ATOM   4646  N   LEU   287     158.888 136.628 226.583  1.00  0.00           N
ATOM   4647  H   LEU   287     159.892 136.555 226.705  1.00  0.00           H
ATOM   4648  CA  LEU   287     158.092 137.119 227.719  1.00  0.00           C
ATOM   4649  HA  LEU   287     157.390 136.338 228.015  1.00  0.00           H
ATOM   4650  CB  LEU   287     159.046 137.405 228.902  1.00  0.00           C
ATOM   4651  HB2 LEU   287     159.736 136.565 228.978  1.00  0.00           H
ATOM   4652  HB3 LEU   287     159.642 138.287 228.677  1.00  0.00           H
ATOM   4653  CG  LEU   287     158.406 137.610 230.290  1.00  0.00           C
ATOM   4654  HG  LEU   287     157.772 136.758 230.521  1.00  0.00           H
ATOM   4655  CD1 LEU   287     159.517 137.703 231.342  1.00  0.00           C
ATOM   4656 HD11 LEU   287     160.166 136.831 231.278  1.00  0.00           H
ATOM   4657 HD12 LEU   287     159.082 137.733 232.341  1.00  0.00           H
ATOM   4658 HD13 LEU   287     160.114 138.600 231.177  1.00  0.00           H
ATOM   4659  CD2 LEU   287     157.571 138.884 230.430  1.00  0.00           C
ATOM   4660 HD21 LEU   287     158.131 139.746 230.067  1.00  0.00           H
ATOM   4661 HD22 LEU   287     156.642 138.785 229.873  1.00  0.00           H
ATOM   4662 HD23 LEU   287     157.311 139.032 231.474  1.00  0.00           H
ATOM   4663  C   LEU   287     157.277 138.359 227.325  1.00  0.00           C
ATOM   4664  O   LEU   287     156.051 138.370 227.435  1.00  0.00           O
ATOM   4665  N   GLU   288     157.947 139.397 226.825  1.00  0.00           N
ATOM   4666  H   GLU   288     158.956 139.323 226.725  1.00  0.00           H
ATOM   4667  CA  GLU   288     157.278 140.621 226.378  1.00  0.00           C
ATOM   4668  HA  GLU   288     156.614 140.979 227.165  1.00  0.00           H
ATOM   4669  CB  GLU   288     158.320 141.702 226.084  1.00  0.00           C
ATOM   4670  HB2 GLU   288     159.013 141.320 225.335  1.00  0.00           H
ATOM   4671  HB3 GLU   288     157.791 142.561 225.668  1.00  0.00           H
ATOM   4672  CG  GLU   288     159.121 142.171 227.308  1.00  0.00           C
ATOM   4673  HG2 GLU   288     158.420 142.420 228.106  1.00  0.00           H
ATOM   4674  HG3 GLU   288     159.752 141.356 227.663  1.00  0.00           H
ATOM   4675  CD  GLU   288     159.998 143.396 226.994  1.00  0.00           C
ATOM   4676  OE1 GLU   288     160.114 143.753 225.793  1.00  0.00           O
ATOM   4677  OE2 GLU   288     160.549 143.972 227.957  1.00  0.00           O
ATOM   4678  C   GLU   288     156.429 140.392 225.119  1.00  0.00           C
ATOM   4679  O   GLU   288     155.337 140.943 224.996  1.00  0.00           O
ATOM   4680  N   ASN   289     156.914 139.582 224.176  1.00  0.00           N
ATOM   4681  H   ASN   289     157.823 139.153 224.336  1.00  0.00           H
ATOM   4682  CA  ASN   289     156.255 139.329 222.894  1.00  0.00           C
ATOM   4683  HA  ASN   289     156.024 140.288 222.430  1.00  0.00           H
ATOM   4684  CB  ASN   289     157.260 138.577 222.010  1.00  0.00           C
ATOM   4685  HB2 ASN   289     158.256 138.961 222.214  1.00  0.00           H
ATOM   4686  HB3 ASN   289     157.258 137.512 222.240  1.00  0.00           H
ATOM   4687  CG  ASN   289     157.054 138.768 220.526  1.00  0.00           C
ATOM   4688  OD1 ASN   289     155.953 138.867 220.003  1.00  0.00           O
ATOM   4689  ND2 ASN   289     158.136 138.849 219.799  1.00  0.00           N
ATOM   4690 HD21 ASN   289     159.057 138.848 220.253  1.00  0.00           H
ATOM   4691 HD22 ASN   289     158.064 138.839 218.801  1.00  0.00           H
ATOM   4692  C   ASN   289     154.927 138.572 223.070  1.00  0.00           C
ATOM   4693  O   ASN   289     153.920 138.952 222.472  1.00  0.00           O
ATOM   4694  N   THR   290     154.886 137.562 223.949  1.00  0.00           N
ATOM   4695  H   THR   290     155.748 137.273 224.407  1.00  0.00           H
ATOM   4696  CA  THR   290     153.627 136.911 224.336  1.00  0.00           C
ATOM   4697  HA  THR   290     153.071 136.721 223.419  1.00  0.00           H
ATOM   4698  CB  THR   290     153.867 135.539 224.995  1.00  0.00           C
ATOM   4699  HB  THR   290     154.628 135.004 224.426  1.00  0.00           H
ATOM   4700  CG2 THR   290     154.269 135.563 226.468  1.00  0.00           C
ATOM   4701 HG21 THR   290     154.471 134.545 226.801  1.00  0.00           H
ATOM   4702 HG22 THR   290     153.466 135.982 227.073  1.00  0.00           H
ATOM   4703 HG23 THR   290     155.168 136.154 226.602  1.00  0.00           H
ATOM   4704  OG1 THR   290     152.679 134.788 224.962  1.00  0.00           O
ATOM   4705  HG1 THR   290     152.433 134.637 224.048  1.00  0.00           H
ATOM   4706  C   THR   290     152.746 137.844 225.173  1.00  0.00           C
ATOM   4707  O   THR   290     151.551 137.934 224.905  1.00  0.00           O
ATOM   4708  N   ALA   291     153.303 138.641 226.097  1.00  0.00           N
ATOM   4709  H   ALA   291     154.293 138.549 226.303  1.00  0.00           H
ATOM   4710  CA  ALA   291     152.520 139.608 226.875  1.00  0.00           C
ATOM   4711  HA  ALA   291     151.748 139.059 227.416  1.00  0.00           H
ATOM   4712  CB  ALA   291     153.429 140.276 227.913  1.00  0.00           C
ATOM   4713  HB1 ALA   291     154.225 140.829 227.416  1.00  0.00           H
ATOM   4714  HB2 ALA   291     153.867 139.518 228.564  1.00  0.00           H
ATOM   4715  HB3 ALA   291     152.843 140.966 228.520  1.00  0.00           H
ATOM   4716  C   ALA   291     151.799 140.654 225.995  1.00  0.00           C
ATOM   4717  O   ALA   291     150.670 141.038 226.300  1.00  0.00           O
ATOM   4718  N   VAL   292     152.392 141.076 224.871  1.00  0.00           N
ATOM   4719  H   VAL   292     153.348 140.778 224.694  1.00  0.00           H
ATOM   4720  CA  VAL   292     151.720 141.947 223.887  1.00  0.00           C
ATOM   4721  HA  VAL   292     151.263 142.771 224.435  1.00  0.00           H
ATOM   4722  CB  VAL   292     152.744 142.574 222.912  1.00  0.00           C
ATOM   4723  HB  VAL   292     153.338 141.782 222.455  1.00  0.00           H
ATOM   4724  CG1 VAL   292     152.106 143.413 221.794  1.00  0.00           C
ATOM   4725 HG11 VAL   292     152.882 143.828 221.152  1.00  0.00           H
ATOM   4726 HG12 VAL   292     151.453 142.795 221.187  1.00  0.00           H
ATOM   4727 HG13 VAL   292     151.515 144.222 222.225  1.00  0.00           H
ATOM   4728  CG2 VAL   292     153.678 143.547 223.651  1.00  0.00           C
ATOM   4729 HG21 VAL   292     154.449 143.911 222.972  1.00  0.00           H
ATOM   4730 HG22 VAL   292     154.167 143.050 224.485  1.00  0.00           H
ATOM   4731 HG23 VAL   292     153.111 144.391 224.043  1.00  0.00           H
ATOM   4732  C   VAL   292     150.554 141.236 223.170  1.00  0.00           C
ATOM   4733  O   VAL   292     149.606 141.911 222.773  1.00  0.00           O
ATOM   4734  N   ASP   293     150.540 139.900 223.066  1.00  0.00           N
ATOM   4735  H   ASP   293     151.327 139.375 223.428  1.00  0.00           H
ATOM   4736  CA  ASP   293     149.348 139.139 222.641  1.00  0.00           C
ATOM   4737  HA  ASP   293     148.888 139.661 221.801  1.00  0.00           H
ATOM   4738  CB  ASP   293     149.685 137.717 222.156  1.00  0.00           C
ATOM   4739  HB2 ASP   293     150.191 137.164 222.946  1.00  0.00           H
ATOM   4740  HB3 ASP   293     148.747 137.199 221.950  1.00  0.00           H
ATOM   4741  CG  ASP   293     150.529 137.653 220.887  1.00  0.00           C
ATOM   4742  OD1 ASP   293     150.893 138.705 220.322  1.00  0.00           O
ATOM   4743  OD2 ASP   293     150.786 136.522 220.424  1.00  0.00           O
ATOM   4744  C   ASP   293     148.281 139.047 223.739  1.00  0.00           C
ATOM   4745  O   ASP   293     147.101 139.208 223.430  1.00  0.00           O
ATOM   4746  N   LEU   294     148.670 138.861 225.010  1.00  0.00           N
ATOM   4747  H   LEU   294     149.656 138.694 225.185  1.00  0.00           H
ATOM   4748  CA  LEU   294     147.739 138.906 226.153  1.00  0.00           C
ATOM   4749  HA  LEU   294     146.971 138.147 226.006  1.00  0.00           H
ATOM   4750  CB  LEU   294     148.480 138.624 227.486  1.00  0.00           C
ATOM   4751  HB2 LEU   294     149.418 139.174 227.487  1.00  0.00           H
ATOM   4752  HB3 LEU   294     147.878 139.049 228.291  1.00  0.00           H
ATOM   4753  CG  LEU   294     148.781 137.162 227.897  1.00  0.00           C
ATOM   4754  HG  LEU   294     149.330 137.199 228.838  1.00  0.00           H
ATOM   4755  CD1 LEU   294     147.514 136.357 228.166  1.00  0.00           C
ATOM   4756 HD11 LEU   294     146.965 136.825 228.979  1.00  0.00           H
ATOM   4757 HD12 LEU   294     147.775 135.343 228.469  1.00  0.00           H
ATOM   4758 HD13 LEU   294     146.896 136.315 227.273  1.00  0.00           H
ATOM   4759  CD2 LEU   294     149.642 136.376 226.915  1.00  0.00           C
ATOM   4760 HD21 LEU   294     149.193 136.368 225.924  1.00  0.00           H
ATOM   4761 HD22 LEU   294     150.629 136.827 226.877  1.00  0.00           H
ATOM   4762 HD23 LEU   294     149.768 135.349 227.259  1.00  0.00           H
ATOM   4763  C   LEU   294     146.995 140.259 226.210  1.00  0.00           C
ATOM   4764  O   LEU   294     145.827 140.293 226.590  1.00  0.00           O
ATOM   4765  N   PHE   295     147.628 141.361 225.780  1.00  0.00           N
ATOM   4766  H   PHE   295     148.616 141.278 225.574  1.00  0.00           H
ATOM   4767  CA  PHE   295     146.935 142.617 225.460  1.00  0.00           C
ATOM   4768  HA  PHE   295     146.205 142.825 226.236  1.00  0.00           H
ATOM   4769  CB  PHE   295     147.922 143.799 225.438  1.00  0.00           C
ATOM   4770  HB2 PHE   295     148.821 143.512 224.892  1.00  0.00           H
ATOM   4771  HB3 PHE   295     147.462 144.621 224.887  1.00  0.00           H
ATOM   4772  CG  PHE   295     148.305 144.339 226.806  1.00  0.00           C
ATOM   4773  CD1 PHE   295     147.410 145.177 227.502  1.00  0.00           C
ATOM   4774  HD1 PHE   295     146.448 145.420 227.072  1.00  0.00           H
ATOM   4775  CE1 PHE   295     147.761 145.701 228.759  1.00  0.00           C
ATOM   4776  HE1 PHE   295     147.067 146.341 229.286  1.00  0.00           H
ATOM   4777  CZ  PHE   295     149.008 145.391 229.329  1.00  0.00           C
ATOM   4778  HZ  PHE   295     149.274 145.791 230.296  1.00  0.00           H
ATOM   4779  CE2 PHE   295     149.907 144.561 228.637  1.00  0.00           C
ATOM   4780  HE2 PHE   295     150.867 144.323 229.072  1.00  0.00           H
ATOM   4781  CD2 PHE   295     149.556 144.039 227.378  1.00  0.00           C
ATOM   4782  HD2 PHE   295     150.254 143.407 226.850  1.00  0.00           H
ATOM   4783  C   PHE   295     146.133 142.537 224.148  1.00  0.00           C
ATOM   4784  O   PHE   295     144.913 142.713 224.152  1.00  0.00           O
ATOM   4785  N   GLY   296     146.801 142.320 223.013  1.00  0.00           N
ATOM   4786  H   GLY   296     147.796 142.124 223.075  1.00  0.00           H
ATOM   4787  CA  GLY   296     146.237 142.550 221.678  1.00  0.00           C
ATOM   4788  HA2 GLY   296     145.884 143.580 221.613  1.00  0.00           H
ATOM   4789  HA3 GLY   296     147.030 142.413 220.944  1.00  0.00           H
ATOM   4790  C   GLY   296     145.079 141.626 221.289  1.00  0.00           C
ATOM   4791  O   GLY   296     144.120 142.087 220.676  1.00  0.00           O
ATOM   4792  N   ALA   297     145.138 140.348 221.668  1.00  0.00           N
ATOM   4793  H   ALA   297     145.928 140.041 222.228  1.00  0.00           H
ATOM   4794  CA  ALA   297     144.102 139.352 221.378  1.00  0.00           C
ATOM   4795  HA  ALA   297     143.609 139.625 220.444  1.00  0.00           H
ATOM   4796  CB  ALA   297     144.799 138.004 221.152  1.00  0.00           C
ATOM   4797  HB1 ALA   297     145.269 137.671 222.077  1.00  0.00           H
ATOM   4798  HB2 ALA   297     145.559 138.100 220.377  1.00  0.00           H
ATOM   4799  HB3 ALA   297     144.065 137.264 220.832  1.00  0.00           H
ATOM   4800  C   ALA   297     142.990 139.280 222.450  1.00  0.00           C
ATOM   4801  O   ALA   297     142.118 138.410 222.373  1.00  0.00           O
ATOM   4802  N   GLY   298     143.022 140.181 223.445  1.00  0.00           N
ATOM   4803  H   GLY   298     143.796 140.830 223.463  1.00  0.00           H
ATOM   4804  CA  GLY   298     142.106 140.169 224.589  1.00  0.00           C
ATOM   4805  HA2 GLY   298     141.314 139.446 224.418  1.00  0.00           H
ATOM   4806  HA3 GLY   298     142.681 139.861 225.460  1.00  0.00           H
ATOM   4807  C   GLY   298     141.433 141.490 224.950  1.00  0.00           C
ATOM   4808  O   GLY   298     140.294 141.493 225.417  1.00  0.00           O
ATOM   4809  N   THR   299     142.095 142.632 224.742  1.00  0.00           N
ATOM   4810  H   THR   299     143.055 142.593 224.416  1.00  0.00           H
ATOM   4811  CA  THR   299     141.552 143.915 225.216  1.00  0.00           C
ATOM   4812  HA  THR   299     141.174 143.747 226.224  1.00  0.00           H
ATOM   4813  CB  THR   299     142.650 144.978 225.340  1.00  0.00           C
ATOM   4814  HB  THR   299     143.509 144.538 225.847  1.00  0.00           H
ATOM   4815  CG2 THR   299     143.122 145.577 224.016  1.00  0.00           C
ATOM   4816 HG21 THR   299     143.422 144.784 223.331  1.00  0.00           H
ATOM   4817 HG22 THR   299     143.982 146.215 224.211  1.00  0.00           H
ATOM   4818 HG23 THR   299     142.332 146.174 223.559  1.00  0.00           H
ATOM   4819  OG1 THR   299     142.169 146.036 226.130  1.00  0.00           O
ATOM   4820  HG1 THR   299     141.315 146.327 225.782  1.00  0.00           H
ATOM   4821  C   THR   299     140.369 144.430 224.392  1.00  0.00           C
ATOM   4822  O   THR   299     139.508 145.111 224.941  1.00  0.00           O
ATOM   4823  N   GLU   300     140.312 144.122 223.090  1.00  0.00           N
ATOM   4824  H   GLU   300     141.064 143.575 222.699  1.00  0.00           H
ATOM   4825  CA  GLU   300     139.244 144.594 222.191  1.00  0.00           C
ATOM   4826  HA  GLU   300     138.734 145.407 222.692  1.00  0.00           H
ATOM   4827  CB  GLU   300     139.864 145.230 220.935  1.00  0.00           C
ATOM   4828  HB2 GLU   300     140.498 146.060 221.250  1.00  0.00           H
ATOM   4829  HB3 GLU   300     140.510 144.488 220.462  1.00  0.00           H
ATOM   4830  CG  GLU   300     138.889 145.754 219.860  1.00  0.00           C
ATOM   4831  HG2 GLU   300     139.495 146.184 219.060  1.00  0.00           H
ATOM   4832  HG3 GLU   300     138.365 144.901 219.424  1.00  0.00           H
ATOM   4833  CD  GLU   300     137.845 146.808 220.293  1.00  0.00           C
ATOM   4834  OE1 GLU   300     137.609 147.079 221.493  1.00  0.00           O
ATOM   4835  OE2 GLU   300     137.196 147.386 219.396  1.00  0.00           O
ATOM   4836  C   GLU   300     138.181 143.517 221.880  1.00  0.00           C
ATOM   4837  O   GLU   300     137.055 143.842 221.507  1.00  0.00           O
ATOM   4838  N   THR   301     138.489 142.232 222.083  1.00  0.00           N
ATOM   4839  H   THR   301     139.390 142.001 222.480  1.00  0.00           H
ATOM   4840  CA  THR   301     137.572 141.101 221.839  1.00  0.00           C
ATOM   4841  HA  THR   301     137.172 141.175 220.828  1.00  0.00           H
ATOM   4842  CB  THR   301     138.319 139.763 221.971  1.00  0.00           C
ATOM   4843  HB  THR   301     137.591 138.954 221.977  1.00  0.00           H
ATOM   4844  CG2 THR   301     139.309 139.524 220.834  1.00  0.00           C
ATOM   4845 HG21 THR   301     139.758 138.537 220.949  1.00  0.00           H
ATOM   4846 HG22 THR   301     140.097 140.277 220.852  1.00  0.00           H
ATOM   4847 HG23 THR   301     138.789 139.563 219.878  1.00  0.00           H
ATOM   4848  OG1 THR   301     139.043 139.768 223.179  1.00  0.00           O
ATOM   4849  HG1 THR   301     139.168 138.853 223.481  1.00  0.00           H
ATOM   4850  C   THR   301     136.379 141.114 222.799  1.00  0.00           C
ATOM   4851  O   THR   301     135.229 141.175 222.361  1.00  0.00           O
ATOM   4852  N   THR   302     136.640 141.127 224.112  1.00  0.00           N
ATOM   4853  H   THR   302     137.610 141.006 224.390  1.00  0.00           H
ATOM   4854  CA  THR   302     135.598 141.261 225.145  1.00  0.00           C
ATOM   4855  HA  THR   302     134.840 140.503 224.957  1.00  0.00           H
ATOM   4856  CB  THR   302     136.183 140.989 226.544  1.00  0.00           C
ATOM   4857  HB  THR   302     136.730 140.048 226.531  1.00  0.00           H
ATOM   4858  CG2 THR   302     137.129 142.076 227.033  1.00  0.00           C
ATOM   4859 HG21 THR   302     137.919 142.254 226.304  1.00  0.00           H
ATOM   4860 HG22 THR   302     137.584 141.767 227.972  1.00  0.00           H
ATOM   4861 HG23 THR   302     136.565 142.989 227.201  1.00  0.00           H
ATOM   4862  OG1 THR   302     135.154 140.904 227.500  1.00  0.00           O
ATOM   4863  HG1 THR   302     134.685 140.078 227.364  1.00  0.00           H
ATOM   4864  C   THR   302     134.900 142.628 225.065  1.00  0.00           C
ATOM   4865  O   THR   302     133.677 142.711 225.180  1.00  0.00           O
ATOM   4866  N   SER   303     135.666 143.685 224.763  1.00  0.00           N
ATOM   4867  H   SER   303     136.656 143.526 224.661  1.00  0.00           H
ATOM   4868  CA  SER   303     135.177 145.053 224.561  1.00  0.00           C
ATOM   4869  HA  SER   303     134.711 145.405 225.482  1.00  0.00           H
ATOM   4870  CB  SER   303     136.366 145.971 224.260  1.00  0.00           C
ATOM   4871  HB2 SER   303     136.893 146.212 225.183  1.00  0.00           H
ATOM   4872  HB3 SER   303     137.040 145.411 223.628  1.00  0.00           H
ATOM   4873  OG  SER   303     136.022 147.155 223.569  1.00  0.00           O
ATOM   4874  HG  SER   303     136.654 147.204 222.807  1.00  0.00           H
ATOM   4875  C   SER   303     134.124 145.114 223.456  1.00  0.00           C
ATOM   4876  O   SER   303     132.997 145.508 223.742  1.00  0.00           O
ATOM   4877  N   THR   304     134.416 144.678 222.222  1.00  0.00           N
ATOM   4878  H   THR   304     135.358 144.352 222.023  1.00  0.00           H
ATOM   4879  CA  THR   304     133.465 144.841 221.108  1.00  0.00           C
ATOM   4880  HA  THR   304     133.169 145.886 221.116  1.00  0.00           H
ATOM   4881  CB  THR   304     134.113 144.604 219.731  1.00  0.00           C
ATOM   4882  HB  THR   304     135.091 145.086 219.713  1.00  0.00           H
ATOM   4883  CG2 THR   304     134.286 143.144 219.343  1.00  0.00           C
ATOM   4884 HG21 THR   304     134.845 143.077 218.410  1.00  0.00           H
ATOM   4885 HG22 THR   304     133.310 142.681 219.208  1.00  0.00           H
ATOM   4886 HG23 THR   304     134.842 142.620 220.120  1.00  0.00           H
ATOM   4887  OG1 THR   304     133.299 145.190 218.730  1.00  0.00           O
ATOM   4888  HG1 THR   304     133.192 144.531 218.017  1.00  0.00           H
ATOM   4889  C   THR   304     132.170 144.044 221.299  1.00  0.00           C
ATOM   4890  O   THR   304     131.104 144.547 220.948  1.00  0.00           O
ATOM   4891  N   THR   305     132.211 142.855 221.921  1.00  0.00           N
ATOM   4892  H   THR   305     133.109 142.490 222.220  1.00  0.00           H
ATOM   4893  CA  THR   305     130.985 142.083 222.206  1.00  0.00           C
ATOM   4894  HA  THR   305     130.351 142.166 221.324  1.00  0.00           H
ATOM   4895  CB  THR   305     131.271 140.578 222.359  1.00  0.00           C
ATOM   4896  HB  THR   305     131.856 140.252 221.500  1.00  0.00           H
ATOM   4897  CG2 THR   305     132.020 140.189 223.627  1.00  0.00           C
ATOM   4898 HG21 THR   305     132.209 139.116 223.617  1.00  0.00           H
ATOM   4899 HG22 THR   305     131.429 140.437 224.507  1.00  0.00           H
ATOM   4900 HG23 THR   305     132.973 140.709 223.660  1.00  0.00           H
ATOM   4901  OG1 THR   305     130.070 139.842 222.380  1.00  0.00           O
ATOM   4902  HG1 THR   305     129.601 139.975 221.551  1.00  0.00           H
ATOM   4903  C   THR   305     130.157 142.680 223.357  1.00  0.00           C
ATOM   4904  O   THR   305     128.944 142.813 223.203  1.00  0.00           O
ATOM   4905  N   LEU   306     130.770 143.169 224.448  1.00  0.00           N
ATOM   4906  H   LEU   306     131.775 143.051 224.539  1.00  0.00           H
ATOM   4907  CA  LEU   306     130.061 143.902 225.519  1.00  0.00           C
ATOM   4908  HA  LEU   306     129.228 143.289 225.862  1.00  0.00           H
ATOM   4909  CB  LEU   306     131.048 144.119 226.692  1.00  0.00           C
ATOM   4910  HB2 LEU   306     131.672 143.229 226.784  1.00  0.00           H
ATOM   4911  HB3 LEU   306     131.719 144.940 226.433  1.00  0.00           H
ATOM   4912  CG  LEU   306     130.472 144.390 228.099  1.00  0.00           C
ATOM   4913  HG  LEU   306     131.314 144.658 228.736  1.00  0.00           H
ATOM   4914  CD1 LEU   306     129.462 145.530 228.192  1.00  0.00           C
ATOM   4915 HD11 LEU   306     129.853 146.405 227.681  1.00  0.00           H
ATOM   4916 HD12 LEU   306     129.292 145.780 229.239  1.00  0.00           H
ATOM   4917 HD13 LEU   306     128.512 145.237 227.746  1.00  0.00           H
ATOM   4918  CD2 LEU   306     129.819 143.148 228.702  1.00  0.00           C
ATOM   4919 HD21 LEU   306     128.966 142.831 228.103  1.00  0.00           H
ATOM   4920 HD22 LEU   306     130.545 142.343 228.753  1.00  0.00           H
ATOM   4921 HD23 LEU   306     129.485 143.364 229.716  1.00  0.00           H
ATOM   4922  C   LEU   306     129.489 145.237 224.991  1.00  0.00           C
ATOM   4923  O   LEU   306     128.340 145.598 225.248  1.00  0.00           O
ATOM   4924  N   ARG   307     130.268 145.941 224.165  1.00  0.00           N
ATOM   4925  H   ARG   307     131.212 145.592 224.018  1.00  0.00           H
ATOM   4926  CA  ARG   307     129.882 147.175 223.464  1.00  0.00           C
ATOM   4927  HA  ARG   307     129.542 147.905 224.200  1.00  0.00           H
ATOM   4928  CB  ARG   307     131.142 147.709 222.767  1.00  0.00           C
ATOM   4929  HB2 ARG   307     131.937 147.770 223.511  1.00  0.00           H
ATOM   4930  HB3 ARG   307     131.438 146.991 222.004  1.00  0.00           H
ATOM   4931  CG  ARG   307     131.034 149.095 222.126  1.00  0.00           C
ATOM   4932  HG2 ARG   307     130.318 149.082 221.307  1.00  0.00           H
ATOM   4933  HG3 ARG   307     130.698 149.814 222.875  1.00  0.00           H
ATOM   4934  CD  ARG   307     132.411 149.534 221.603  1.00  0.00           C
ATOM   4935  HD2 ARG   307     132.310 150.535 221.184  1.00  0.00           H
ATOM   4936  HD3 ARG   307     133.102 149.582 222.446  1.00  0.00           H
ATOM   4937  NE  ARG   307     132.946 148.647 220.548  1.00  0.00           N
ATOM   4938  HE  ARG   307     132.291 148.298 219.873  1.00  0.00           H
ATOM   4939  CZ  ARG   307     134.217 148.379 220.293  1.00  0.00           C
ATOM   4940  NH1 ARG   307     135.215 148.722 221.051  1.00  0.00           N
ATOM   4941 HH11 ARG   307     135.061 149.064 221.979  1.00  0.00           H
ATOM   4942 HH12 ARG   307     136.137 148.339 220.814  1.00  0.00           H
ATOM   4943  NH2 ARG   307     134.534 147.708 219.235  1.00  0.00           N
ATOM   4944 HH21 ARG   307     133.877 147.085 218.791  1.00  0.00           H
ATOM   4945 HH22 ARG   307     135.537 147.548 219.094  1.00  0.00           H
ATOM   4946  C   ARG   307     128.714 146.941 222.506  1.00  0.00           C
ATOM   4947  O   ARG   307     127.883 147.836 222.373  1.00  0.00           O
ATOM   4948  N   TYR   308     128.606 145.752 221.904  1.00  0.00           N
ATOM   4949  H   TYR   308     129.381 145.106 221.992  1.00  0.00           H
ATOM   4950  CA  TYR   308     127.410 145.299 221.186  1.00  0.00           C
ATOM   4951  HA  TYR   308     127.065 146.121 220.561  1.00  0.00           H
ATOM   4952  CB  TYR   308     127.738 144.099 220.274  1.00  0.00           C
ATOM   4953  HB2 TYR   308     128.763 143.771 220.434  1.00  0.00           H
ATOM   4954  HB3 TYR   308     127.103 143.252 220.540  1.00  0.00           H
ATOM   4955  CG  TYR   308     127.528 144.386 218.801  1.00  0.00           C
ATOM   4956  CD1 TYR   308     126.263 144.820 218.355  1.00  0.00           C
ATOM   4957  HD1 TYR   308     125.451 144.930 219.060  1.00  0.00           H
ATOM   4958  CE1 TYR   308     126.057 145.125 216.998  1.00  0.00           C
ATOM   4959  HE1 TYR   308     125.090 145.460 216.658  1.00  0.00           H
ATOM   4960  CZ  TYR   308     127.118 144.987 216.080  1.00  0.00           C
ATOM   4961  OH  TYR   308     126.928 145.300 214.775  1.00  0.00           O
ATOM   4962  HH  TYR   308     126.011 145.568 214.596  1.00  0.00           H
ATOM   4963  CE2 TYR   308     128.381 144.544 216.521  1.00  0.00           C
ATOM   4964  HE2 TYR   308     129.182 144.440 215.806  1.00  0.00           H
ATOM   4965  CD2 TYR   308     128.588 144.246 217.882  1.00  0.00           C
ATOM   4966  HD2 TYR   308     129.565 143.925 218.222  1.00  0.00           H
ATOM   4967  C   TYR   308     126.247 144.941 222.122  1.00  0.00           C
ATOM   4968  O   TYR   308     125.104 145.277 221.813  1.00  0.00           O
ATOM   4969  N   ALA   309     126.512 144.296 223.264  1.00  0.00           N
ATOM   4970  H   ALA   309     127.467 144.002 223.441  1.00  0.00           H
ATOM   4971  CA  ALA   309     125.483 143.861 224.212  1.00  0.00           C
ATOM   4972  HA  ALA   309     124.841 143.139 223.707  1.00  0.00           H
ATOM   4973  CB  ALA   309     126.136 143.168 225.419  1.00  0.00           C
ATOM   4974  HB1 ALA   309     125.363 142.682 226.017  1.00  0.00           H
ATOM   4975  HB2 ALA   309     126.649 143.895 226.047  1.00  0.00           H
ATOM   4976  HB3 ALA   309     126.853 142.414 225.093  1.00  0.00           H
ATOM   4977  C   ALA   309     124.590 145.019 224.666  1.00  0.00           C
ATOM   4978  O   ALA   309     123.375 144.859 224.715  1.00  0.00           O
ATOM   4979  N   LEU   310     125.160 146.204 224.911  1.00  0.00           N
ATOM   4980  H   LEU   310     126.172 146.260 224.879  1.00  0.00           H
ATOM   4981  CA  LEU   310     124.383 147.399 225.253  1.00  0.00           C
ATOM   4982  HA  LEU   310     123.757 147.163 226.113  1.00  0.00           H
ATOM   4983  CB  LEU   310     125.333 148.543 225.647  1.00  0.00           C
ATOM   4984  HB2 LEU   310     126.014 148.714 224.815  1.00  0.00           H
ATOM   4985  HB3 LEU   310     124.745 149.450 225.791  1.00  0.00           H
ATOM   4986  CG  LEU   310     126.161 148.287 226.924  1.00  0.00           C
ATOM   4987  HG  LEU   310     126.745 147.375 226.807  1.00  0.00           H
ATOM   4988  CD1 LEU   310     127.128 149.447 227.161  1.00  0.00           C
ATOM   4989 HD11 LEU   310     127.792 149.549 226.303  1.00  0.00           H
ATOM   4990 HD12 LEU   310     127.734 149.249 228.045  1.00  0.00           H
ATOM   4991 HD13 LEU   310     126.576 150.375 227.302  1.00  0.00           H
ATOM   4992  CD2 LEU   310     125.284 148.158 228.174  1.00  0.00           C
ATOM   4993 HD21 LEU   310     124.648 149.036 228.281  1.00  0.00           H
ATOM   4994 HD22 LEU   310     124.663 147.266 228.107  1.00  0.00           H
ATOM   4995 HD23 LEU   310     125.915 148.060 229.058  1.00  0.00           H
ATOM   4996  C   LEU   310     123.404 147.827 224.140  1.00  0.00           C
ATOM   4997  O   LEU   310     122.296 148.251 224.463  1.00  0.00           O
ATOM   4998  N   LEU   311     123.732 147.657 222.850  1.00  0.00           N
ATOM   4999  H   LEU   311     124.619 147.228 222.621  1.00  0.00           H
ATOM   5000  CA  LEU   311     122.749 147.866 221.776  1.00  0.00           C
ATOM   5001  HA  LEU   311     122.255 148.827 221.938  1.00  0.00           H
ATOM   5002  CB  LEU   311     123.374 147.883 220.367  1.00  0.00           C
ATOM   5003  HB2 LEU   311     123.978 146.990 220.208  1.00  0.00           H
ATOM   5004  HB3 LEU   311     122.537 147.832 219.671  1.00  0.00           H
ATOM   5005  CG  LEU   311     124.180 149.139 219.998  1.00  0.00           C
ATOM   5006  HG  LEU   311     123.687 150.026 220.396  1.00  0.00           H
ATOM   5007  CD1 LEU   311     125.608 149.068 220.526  1.00  0.00           C
ATOM   5008 HD11 LEU   311     125.604 149.133 221.613  1.00  0.00           H
ATOM   5009 HD12 LEU   311     126.179 149.907 220.134  1.00  0.00           H
ATOM   5010 HD13 LEU   311     126.083 148.141 220.216  1.00  0.00           H
ATOM   5011  CD2 LEU   311     124.257 149.272 218.475  1.00  0.00           C
ATOM   5012 HD21 LEU   311     124.725 148.387 218.043  1.00  0.00           H
ATOM   5013 HD22 LEU   311     123.254 149.393 218.062  1.00  0.00           H
ATOM   5014 HD23 LEU   311     124.839 150.157 218.214  1.00  0.00           H
ATOM   5015  C   LEU   311     121.653 146.796 221.820  1.00  0.00           C
ATOM   5016  O   LEU   311     120.477 147.141 221.764  1.00  0.00           O
ATOM   5017  N   LEU   312     122.007 145.510 221.931  1.00  0.00           N
ATOM   5018  H   LEU   312     122.994 145.284 222.002  1.00  0.00           H
ATOM   5019  CA  LEU   312     121.017 144.424 221.951  1.00  0.00           C
ATOM   5020  HA  LEU   312     120.365 144.543 221.087  1.00  0.00           H
ATOM   5021  CB  LEU   312     121.710 143.046 221.873  1.00  0.00           C
ATOM   5022  HB2 LEU   312     122.561 143.028 222.555  1.00  0.00           H
ATOM   5023  HB3 LEU   312     121.001 142.310 222.247  1.00  0.00           H
ATOM   5024  CG  LEU   312     122.157 142.540 220.484  1.00  0.00           C
ATOM   5025  HG  LEU   312     122.410 141.486 220.589  1.00  0.00           H
ATOM   5026  CD1 LEU   312     121.055 142.643 219.428  1.00  0.00           C
ATOM   5027 HD11 LEU   312     120.136 142.220 219.829  1.00  0.00           H
ATOM   5028 HD12 LEU   312     121.345 142.067 218.549  1.00  0.00           H
ATOM   5029 HD13 LEU   312     120.897 143.679 219.136  1.00  0.00           H
ATOM   5030  CD2 LEU   312     123.399 143.248 219.949  1.00  0.00           C
ATOM   5031 HD21 LEU   312     123.200 144.309 219.807  1.00  0.00           H
ATOM   5032 HD22 LEU   312     124.217 143.116 220.655  1.00  0.00           H
ATOM   5033 HD23 LEU   312     123.691 142.805 218.996  1.00  0.00           H
ATOM   5034  C   LEU   312     120.081 144.501 223.173  1.00  0.00           C
ATOM   5035  O   LEU   312     118.897 144.194 223.041  1.00  0.00           O
ATOM   5036  N   LEU   313     120.582 144.954 224.324  1.00  0.00           N
ATOM   5037  H   LEU   313     121.581 145.126 224.358  1.00  0.00           H
ATOM   5038  CA  LEU   313     119.811 145.206 225.543  1.00  0.00           C
ATOM   5039  HA  LEU   313     119.203 144.329 225.765  1.00  0.00           H
ATOM   5040  CB  LEU   313     120.803 145.450 226.703  1.00  0.00           C
ATOM   5041  HB2 LEU   313     121.570 146.143 226.356  1.00  0.00           H
ATOM   5042  HB3 LEU   313     120.298 145.943 227.531  1.00  0.00           H
ATOM   5043  CG  LEU   313     121.482 144.169 227.232  1.00  0.00           C
ATOM   5044  HG  LEU   313     121.838 143.566 226.398  1.00  0.00           H
ATOM   5045  CD1 LEU   313     122.680 144.536 228.112  1.00  0.00           C
ATOM   5046 HD11 LEU   313     123.408 145.092 227.523  1.00  0.00           H
ATOM   5047 HD12 LEU   313     123.154 143.630 228.486  1.00  0.00           H
ATOM   5048 HD13 LEU   313     122.352 145.147 228.954  1.00  0.00           H
ATOM   5049  CD2 LEU   313     120.536 143.312 228.076  1.00  0.00           C
ATOM   5050 HD21 LEU   313     120.226 143.864 228.962  1.00  0.00           H
ATOM   5051 HD22 LEU   313     119.659 143.028 227.497  1.00  0.00           H
ATOM   5052 HD23 LEU   313     121.049 142.403 228.391  1.00  0.00           H
ATOM   5053  C   LEU   313     118.834 146.383 225.378  1.00  0.00           C
ATOM   5054  O   LEU   313     117.644 146.231 225.652  1.00  0.00           O
ATOM   5055  N   LEU   314     119.306 147.548 224.916  1.00  0.00           N
ATOM   5056  H   LEU   314     120.297 147.626 224.709  1.00  0.00           H
ATOM   5057  CA  LEU   314     118.475 148.759 224.824  1.00  0.00           C
ATOM   5058  HA  LEU   314     117.815 148.787 225.691  1.00  0.00           H
ATOM   5059  CB  LEU   314     119.365 150.018 224.846  1.00  0.00           C
ATOM   5060  HB2 LEU   314     120.260 149.839 224.251  1.00  0.00           H
ATOM   5061  HB3 LEU   314     118.826 150.829 224.354  1.00  0.00           H
ATOM   5062  CG  LEU   314     119.776 150.535 226.239  1.00  0.00           C
[truncated: 6,521,429 more chars]
