# Supplementary material for: Differing Membrane Interactions of Two Highly Similar Drug-Metabolizing Cytochrome P450 Isoforms: CYP 2C9 and CYP 2C19
Source: Int J Mol Sci. 2019 Sep 4;20(18):4328. doi: 10.3390/ijms20184328 (PMC6770661; doi:10.3390/ijms20184328)
Supplement: Supplementary file 1 [file ijms-20-04328-s001.zip › CYP_2C9_2C19_pdb/2C9_SIM3_final_noW.pdb]

CRYST1  150.855  131.308  164.381  90.00  90.00  90.00 P 1           1
ATOM      1  N   MET X   1     207.871 203.863 267.427  1.00  0.00           N
ATOM      2  H1  MET X   1     208.808 203.522 267.587  1.00  0.00           H
ATOM      3  H2  MET X   1     207.653 203.539 266.496  1.00  0.00           H
ATOM      4  H3  MET X   1     207.844 204.867 267.535  1.00  0.00           H
ATOM      5  CA  MET X   1     206.904 203.246 268.298  1.00  0.00           C
ATOM      6  HA  MET X   1     207.106 202.187 268.139  1.00  0.00           H
ATOM      7  CB  MET X   1     207.144 203.536 269.842  1.00  0.00           C
ATOM      8  HB2 MET X   1     208.104 203.088 270.098  1.00  0.00           H
ATOM      9  HB3 MET X   1     207.145 204.593 270.108  1.00  0.00           H
ATOM     10  CG  MET X   1     206.145 202.869 270.653  1.00  0.00           C
ATOM     11  HG2 MET X   1     205.169 203.343 270.547  1.00  0.00           H
ATOM     12  HG3 MET X   1     206.023 201.845 270.301  1.00  0.00           H
ATOM     13  SD  MET X   1     206.477 202.996 272.360  1.00  0.00           S
ATOM     14  CE  MET X   1     206.321 204.810 272.637  1.00  0.00           C
ATOM     15  HE1 MET X   1     206.355 205.164 273.667  1.00  0.00           H
ATOM     16  HE2 MET X   1     207.225 205.237 272.201  1.00  0.00           H
ATOM     17  HE3 MET X   1     205.432 205.309 272.253  1.00  0.00           H
ATOM     18  C   MET X   1     205.430 203.403 267.900  1.00  0.00           C
ATOM     19  O   MET X   1     205.045 204.604 267.695  1.00  0.00           O
ATOM     20  N   ASP X   2     204.797 202.295 267.707  1.00  0.00           N
ATOM     21  H   ASP X   2     205.337 201.452 267.838  1.00  0.00           H
ATOM     22  CA  ASP X   2     203.383 202.271 267.307  1.00  0.00           C
ATOM     23  HA  ASP X   2     203.332 202.721 266.316  1.00  0.00           H
ATOM     24  CB  ASP X   2     202.846 200.828 267.242  1.00  0.00           C
ATOM     25  HB2 ASP X   2     203.631 200.113 267.490  1.00  0.00           H
ATOM     26  HB3 ASP X   2     201.966 200.697 267.872  1.00  0.00           H
ATOM     27  CG  ASP X   2     202.618 200.403 265.781  1.00  0.00           C
ATOM     28  OD1 ASP X   2     201.776 199.502 265.628  1.00  0.00           O
ATOM     29  OD2 ASP X   2     203.139 200.989 264.795  1.00  0.00           O
ATOM     30  C   ASP X   2     202.555 203.081 268.311  1.00  0.00           C
ATOM     31  O   ASP X   2     202.740 203.018 269.517  1.00  0.00           O
ATOM     32  N   SER X   3     201.470 203.695 267.819  1.00  0.00           N
ATOM     33  H   SER X   3     201.346 203.819 266.825  1.00  0.00           H
ATOM     34  CA  SER X   3     200.572 204.562 268.642  1.00  0.00           C
ATOM     35  HA  SER X   3     201.156 205.340 269.134  1.00  0.00           H
ATOM     36  CB  SER X   3     199.604 205.318 267.796  1.00  0.00           C
ATOM     37  HB2 SER X   3     199.036 204.552 267.266  1.00  0.00           H
ATOM     38  HB3 SER X   3     198.932 205.826 268.487  1.00  0.00           H
ATOM     39  OG  SER X   3     200.270 206.303 267.011  1.00  0.00           O
ATOM     40  HG  SER X   3     200.779 205.731 266.430  1.00  0.00           H
ATOM     41  C   SER X   3     199.840 203.772 269.626  1.00  0.00           C
ATOM     42  O   SER X   3     199.491 204.193 270.680  1.00  0.00           O
ATOM     43  N   LEU X   4     199.546 202.470 269.436  1.00  0.00           N
ATOM     44  H   LEU X   4     199.657 202.072 268.514  1.00  0.00           H
ATOM     45  CA  LEU X   4     198.953 201.638 270.494  1.00  0.00           C
ATOM     46  HA  LEU X   4     198.075 202.115 270.929  1.00  0.00           H
ATOM     47  CB  LEU X   4     198.309 200.364 269.850  1.00  0.00           C
ATOM     48  HB2 LEU X   4     197.332 200.578 269.417  1.00  0.00           H
ATOM     49  HB3 LEU X   4     198.971 200.056 269.040  1.00  0.00           H
ATOM     50  CG  LEU X   4     198.069 199.277 270.859  1.00  0.00           C
ATOM     51  HG  LEU X   4     199.014 199.014 271.334  1.00  0.00           H
ATOM     52  CD1 LEU X   4     196.955 199.659 271.786  1.00  0.00           C
ATOM     53 HD11 LEU X   4     197.221 200.562 272.334  1.00  0.00           H
ATOM     54 HD12 LEU X   4     196.041 200.075 271.362  1.00  0.00           H
ATOM     55 HD13 LEU X   4     196.843 198.832 272.488  1.00  0.00           H
ATOM     56  CD2 LEU X   4     197.604 197.979 270.136  1.00  0.00           C
ATOM     57 HD21 LEU X   4     197.215 197.281 270.878  1.00  0.00           H
ATOM     58 HD22 LEU X   4     196.864 198.301 269.404  1.00  0.00           H
ATOM     59 HD23 LEU X   4     198.432 197.440 269.676  1.00  0.00           H
ATOM     60  C   LEU X   4     199.972 201.332 271.636  1.00  0.00           C
ATOM     61  O   LEU X   4     199.646 201.191 272.796  1.00  0.00           O
ATOM     62  N   VAL X   5     201.268 201.315 271.324  1.00  0.00           N
ATOM     63  H   VAL X   5     201.528 201.638 270.403  1.00  0.00           H
ATOM     64  CA  VAL X   5     202.351 201.114 272.315  1.00  0.00           C
ATOM     65  HA  VAL X   5     201.901 200.449 273.053  1.00  0.00           H
ATOM     66  CB  VAL X   5     203.654 200.565 271.653  1.00  0.00           C
ATOM     67  HB  VAL X   5     204.078 201.388 271.078  1.00  0.00           H
ATOM     68  CG1 VAL X   5     204.502 199.911 272.744  1.00  0.00           C
ATOM     69 HG11 VAL X   5     205.435 199.551 272.310  1.00  0.00           H
ATOM     70 HG12 VAL X   5     204.728 200.598 273.559  1.00  0.00           H
ATOM     71 HG13 VAL X   5     203.921 199.024 272.996  1.00  0.00           H
ATOM     72  CG2 VAL X   5     203.453 199.406 270.572  1.00  0.00           C
ATOM     73 HG21 VAL X   5     202.994 199.894 269.712  1.00  0.00           H
ATOM     74 HG22 VAL X   5     202.818 198.594 270.927  1.00  0.00           H
ATOM     75 HG23 VAL X   5     204.416 199.017 270.239  1.00  0.00           H
ATOM     76  C   VAL X   5     202.571 202.388 273.109  1.00  0.00           C
ATOM     77  O   VAL X   5     202.979 202.464 274.245  1.00  0.00           O
ATOM     78  N   VAL X   6     202.346 203.586 272.503  1.00  0.00           N
ATOM     79  H   VAL X   6     202.188 203.589 271.505  1.00  0.00           H
ATOM     80  CA  VAL X   6     202.452 204.857 273.195  1.00  0.00           C
ATOM     81  HA  VAL X   6     203.404 204.960 273.717  1.00  0.00           H
ATOM     82  CB  VAL X   6     202.141 206.083 272.277  1.00  0.00           C
ATOM     83  HB  VAL X   6     201.137 205.866 271.911  1.00  0.00           H
ATOM     84  CG1 VAL X   6     202.149 207.451 273.073  1.00  0.00           C
ATOM     85 HG11 VAL X   6     203.157 207.782 273.323  1.00  0.00           H
ATOM     86 HG12 VAL X   6     201.600 208.179 272.476  1.00  0.00           H
ATOM     87 HG13 VAL X   6     201.621 207.422 274.026  1.00  0.00           H
ATOM     88  CG2 VAL X   6     202.906 206.254 271.028  1.00  0.00           C
ATOM     89 HG21 VAL X   6     202.459 206.988 270.358  1.00  0.00           H
ATOM     90 HG22 VAL X   6     202.882 205.306 270.490  1.00  0.00           H
ATOM     91 HG23 VAL X   6     203.988 206.376 271.078  1.00  0.00           H
ATOM     92  C   VAL X   6     201.461 204.835 274.369  1.00  0.00           C
ATOM     93  O   VAL X   6     201.734 205.105 275.510  1.00  0.00           O
ATOM     94  N   LEU X   7     200.184 204.447 274.133  1.00  0.00           N
ATOM     95  H   LEU X   7     199.991 204.262 273.159  1.00  0.00           H
ATOM     96  CA  LEU X   7     199.096 204.328 275.094  1.00  0.00           C
ATOM     97  HA  LEU X   7     198.829 205.294 275.522  1.00  0.00           H
ATOM     98  CB  LEU X   7     197.919 203.740 274.270  1.00  0.00           C
ATOM     99  HB2 LEU X   7     197.797 204.350 273.375  1.00  0.00           H
ATOM    100  HB3 LEU X   7     198.183 202.727 273.966  1.00  0.00           H
ATOM    101  CG  LEU X   7     196.533 203.750 275.042  1.00  0.00           C
ATOM    102  HG  LEU X   7     196.708 203.710 276.117  1.00  0.00           H
ATOM    103  CD1 LEU X   7     195.823 205.074 274.807  1.00  0.00           C
ATOM    104 HD11 LEU X   7     196.250 205.899 275.378  1.00  0.00           H
ATOM    105 HD12 LEU X   7     195.983 205.344 273.763  1.00  0.00           H
ATOM    106 HD13 LEU X   7     194.755 205.128 275.018  1.00  0.00           H
ATOM    107  CD2 LEU X   7     195.745 202.475 274.556  1.00  0.00           C
ATOM    108 HD21 LEU X   7     195.635 202.723 273.500  1.00  0.00           H
ATOM    109 HD22 LEU X   7     196.358 201.582 274.679  1.00  0.00           H
ATOM    110 HD23 LEU X   7     194.802 202.218 275.039  1.00  0.00           H
ATOM    111  C   LEU X   7     199.414 203.299 276.181  1.00  0.00           C
ATOM    112  O   LEU X   7     198.966 203.405 277.283  1.00  0.00           O
ATOM    113  N   VAL X   8     200.134 202.284 275.876  1.00  0.00           N
ATOM    114  H   VAL X   8     200.593 202.270 274.976  1.00  0.00           H
ATOM    115  CA  VAL X   8     200.421 201.210 276.857  1.00  0.00           C
ATOM    116  HA  VAL X   8     199.518 201.086 277.453  1.00  0.00           H
ATOM    117  CB  VAL X   8     200.692 199.900 276.070  1.00  0.00           C
ATOM    118  HB  VAL X   8     200.059 199.945 275.184  1.00  0.00           H
ATOM    119  CG1 VAL X   8     202.167 199.632 275.713  1.00  0.00           C
ATOM    120 HG11 VAL X   8     202.262 198.906 274.905  1.00  0.00           H
ATOM    121 HG12 VAL X   8     202.603 200.604 275.483  1.00  0.00           H
ATOM    122 HG13 VAL X   8     202.738 199.196 276.533  1.00  0.00           H
ATOM    123  CG2 VAL X   8     200.163 198.609 276.733  1.00  0.00           C
ATOM    124 HG21 VAL X   8     200.548 198.602 277.753  1.00  0.00           H
ATOM    125 HG22 VAL X   8     200.382 197.730 276.126  1.00  0.00           H
ATOM    126 HG23 VAL X   8     199.074 198.628 276.786  1.00  0.00           H
ATOM    127  C   VAL X   8     201.677 201.623 277.680  1.00  0.00           C
ATOM    128  O   VAL X   8     201.717 201.369 278.930  1.00  0.00           O
ATOM    129  N   LEU X   9     202.574 202.511 277.150  1.00  0.00           N
ATOM    130  H   LEU X   9     202.462 202.828 276.198  1.00  0.00           H
ATOM    131  CA  LEU X   9     203.710 203.086 277.854  1.00  0.00           C
ATOM    132  HA  LEU X   9     204.234 202.261 278.336  1.00  0.00           H
ATOM    133  CB  LEU X   9     204.774 203.629 276.840  1.00  0.00           C
ATOM    134  HB2 LEU X   9     205.249 202.792 276.329  1.00  0.00           H
ATOM    135  HB3 LEU X   9     204.374 204.277 276.060  1.00  0.00           H
ATOM    136  CG  LEU X   9     205.952 204.335 277.513  1.00  0.00           C
ATOM    137  HG  LEU X   9     205.714 205.170 278.172  1.00  0.00           H
ATOM    138  CD1 LEU X   9     206.858 203.324 278.300  1.00  0.00           C
ATOM    139 HD11 LEU X   9     206.275 202.869 279.101  1.00  0.00           H
ATOM    140 HD12 LEU X   9     207.122 202.449 277.705  1.00  0.00           H
ATOM    141 HD13 LEU X   9     207.692 203.819 278.796  1.00  0.00           H
ATOM    142  CD2 LEU X   9     206.839 204.976 276.396  1.00  0.00           C
ATOM    143 HD21 LEU X   9     207.682 205.467 276.881  1.00  0.00           H
ATOM    144 HD22 LEU X   9     207.307 204.233 275.750  1.00  0.00           H
ATOM    145 HD23 LEU X   9     206.231 205.695 275.846  1.00  0.00           H
ATOM    146  C   LEU X   9     203.274 204.140 278.822  1.00  0.00           C
ATOM    147  O   LEU X   9     203.607 204.060 280.020  1.00  0.00           O
ATOM    148  N   CYS X  10     202.461 205.080 278.349  1.00  0.00           N
ATOM    149  H   CYS X  10     202.213 205.183 277.375  1.00  0.00           H
ATOM    150  CA  CYS X  10     201.865 206.110 279.208  1.00  0.00           C
ATOM    151  HA  CYS X  10     202.625 206.711 279.708  1.00  0.00           H
ATOM    152  CB  CYS X  10     200.958 206.967 278.358  1.00  0.00           C
ATOM    153  HB2 CYS X  10     200.230 206.324 277.865  1.00  0.00           H
ATOM    154  HB3 CYS X  10     200.561 207.763 278.988  1.00  0.00           H
ATOM    155  SG  CYS X  10     201.747 207.786 276.933  1.00  0.00           S
ATOM    156  HG  CYS X  10     201.234 207.098 275.909  1.00  0.00           H
ATOM    157  C   CYS X  10     201.133 205.470 280.420  1.00  0.00           C
ATOM    158  O   CYS X  10     201.274 205.854 281.568  1.00  0.00           O
ATOM    159  N   LEU X  11     200.259 204.570 280.180  1.00  0.00           N
ATOM    160  H   LEU X  11     200.003 204.349 279.228  1.00  0.00           H
ATOM    161  CA  LEU X  11     199.638 203.794 281.277  1.00  0.00           C
ATOM    162  HA  LEU X  11     199.046 204.532 281.818  1.00  0.00           H
ATOM    163  CB  LEU X  11     198.758 202.800 280.546  1.00  0.00           C
ATOM    164  HB2 LEU X  11     199.386 202.358 279.773  1.00  0.00           H
ATOM    165  HB3 LEU X  11     198.562 202.009 281.270  1.00  0.00           H
ATOM    166  CG  LEU X  11     197.475 203.452 279.958  1.00  0.00           C
ATOM    167  HG  LEU X  11     197.795 204.171 279.204  1.00  0.00           H
ATOM    168  CD1 LEU X  11     196.652 202.367 279.342  1.00  0.00           C
ATOM    169 HD11 LEU X  11     195.939 202.758 278.616  1.00  0.00           H
ATOM    170 HD12 LEU X  11     197.380 201.927 278.661  1.00  0.00           H
ATOM    171 HD13 LEU X  11     196.116 201.701 280.019  1.00  0.00           H
ATOM    172  CD2 LEU X  11     196.466 204.253 280.811  1.00  0.00           C
ATOM    173 HD21 LEU X  11     195.542 204.412 280.257  1.00  0.00           H
ATOM    174 HD22 LEU X  11     196.168 203.652 281.670  1.00  0.00           H
ATOM    175 HD23 LEU X  11     196.858 205.160 281.271  1.00  0.00           H
ATOM    176  C   LEU X  11     200.617 203.167 282.240  1.00  0.00           C
ATOM    177  O   LEU X  11     200.310 203.200 283.464  1.00  0.00           O
ATOM    178  N   SER X  12     201.712 202.577 281.751  1.00  0.00           N
ATOM    179  H   SER X  12     201.774 202.508 280.745  1.00  0.00           H
ATOM    180  CA  SER X  12     202.668 202.026 282.622  1.00  0.00           C
ATOM    181  HA  SER X  12     202.187 201.344 283.323  1.00  0.00           H
ATOM    182  CB  SER X  12     203.724 201.260 281.842  1.00  0.00           C
ATOM    183  HB2 SER X  12     204.232 201.869 281.094  1.00  0.00           H
ATOM    184  HB3 SER X  12     204.439 200.807 282.528  1.00  0.00           H
ATOM    185  OG  SER X  12     203.050 200.142 281.139  1.00  0.00           O
ATOM    186  HG  SER X  12     202.548 200.514 280.410  1.00  0.00           H
ATOM    187  C   SER X  12     203.351 203.032 283.555  1.00  0.00           C
ATOM    188  O   SER X  12     203.383 202.858 284.732  1.00  0.00           O
ATOM    189  N   CYS X  13     203.692 204.199 283.067  1.00  0.00           N
ATOM    190  H   CYS X  13     203.459 204.416 282.109  1.00  0.00           H
ATOM    191  CA  CYS X  13     204.139 205.333 283.869  1.00  0.00           C
ATOM    192  HA  CYS X  13     205.028 204.990 284.400  1.00  0.00           H
ATOM    193  CB  CYS X  13     204.387 206.432 282.802  1.00  0.00           C
ATOM    194  HB2 CYS X  13     203.580 206.522 282.075  1.00  0.00           H
ATOM    195  HB3 CYS X  13     204.640 207.304 283.405  1.00  0.00           H
ATOM    196  SG  CYS X  13     205.727 205.946 281.742  1.00  0.00           S
ATOM    197  HG  CYS X  13     205.183 204.995 280.978  1.00  0.00           H
ATOM    198  C   CYS X  13     203.103 205.803 284.944  1.00  0.00           C
ATOM    199  O   CYS X  13     203.437 206.007 286.082  1.00  0.00           O
ATOM    200  N   LEU X  14     201.820 205.962 284.528  1.00  0.00           N
ATOM    201  H   LEU X  14     201.506 205.795 283.583  1.00  0.00           H
ATOM    202  CA  LEU X  14     200.670 206.250 285.448  1.00  0.00           C
ATOM    203  HA  LEU X  14     200.773 207.215 285.947  1.00  0.00           H
ATOM    204  CB  LEU X  14     199.411 206.346 284.598  1.00  0.00           C
ATOM    205  HB2 LEU X  14     199.618 206.968 283.728  1.00  0.00           H
ATOM    206  HB3 LEU X  14     199.236 205.345 284.203  1.00  0.00           H
ATOM    207  CG  LEU X  14     198.115 206.885 285.228  1.00  0.00           C
ATOM    208  HG  LEU X  14     198.037 206.167 286.045  1.00  0.00           H
ATOM    209  CD1 LEU X  14     198.151 208.353 285.763  1.00  0.00           C
ATOM    210 HD11 LEU X  14     197.221 208.706 286.209  1.00  0.00           H
ATOM    211 HD12 LEU X  14     198.808 208.234 286.624  1.00  0.00           H
ATOM    212 HD13 LEU X  14     198.545 208.992 284.973  1.00  0.00           H
ATOM    213  CD2 LEU X  14     197.004 206.725 284.194  1.00  0.00           C
ATOM    214 HD21 LEU X  14     197.219 207.436 283.396  1.00  0.00           H
ATOM    215 HD22 LEU X  14     196.905 205.713 283.802  1.00  0.00           H
ATOM    216 HD23 LEU X  14     196.071 207.114 284.602  1.00  0.00           H
ATOM    217  C   LEU X  14     200.495 205.190 286.589  1.00  0.00           C
ATOM    218  O   LEU X  14     200.448 205.584 287.741  1.00  0.00           O
ATOM    219  N   LEU X  15     200.561 203.910 286.244  1.00  0.00           N
ATOM    220  H   LEU X  15     200.692 203.586 285.296  1.00  0.00           H
ATOM    221  CA  LEU X  15     200.650 202.827 287.217  1.00  0.00           C
ATOM    222  HA  LEU X  15     199.773 202.800 287.863  1.00  0.00           H
ATOM    223  CB  LEU X  15     200.825 201.523 286.386  1.00  0.00           C
ATOM    224  HB2 LEU X  15     201.594 201.579 285.615  1.00  0.00           H
ATOM    225  HB3 LEU X  15     201.187 200.770 287.085  1.00  0.00           H
ATOM    226  CG  LEU X  15     199.617 200.966 285.708  1.00  0.00           C
ATOM    227  HG  LEU X  15     199.087 201.658 285.053  1.00  0.00           H
ATOM    228  CD1 LEU X  15     200.038 199.720 284.930  1.00  0.00           C
ATOM    229 HD11 LEU X  15     200.530 199.912 283.977  1.00  0.00           H
ATOM    230 HD12 LEU X  15     200.798 199.268 285.568  1.00  0.00           H
ATOM    231 HD13 LEU X  15     199.261 198.991 284.699  1.00  0.00           H
ATOM    232  CD2 LEU X  15     198.638 200.536 286.825  1.00  0.00           C
ATOM    233 HD21 LEU X  15     197.721 200.154 286.377  1.00  0.00           H
ATOM    234 HD22 LEU X  15     199.043 199.673 287.355  1.00  0.00           H
ATOM    235 HD23 LEU X  15     198.421 201.410 287.438  1.00  0.00           H
ATOM    236  C   LEU X  15     201.845 203.032 288.197  1.00  0.00           C
ATOM    237  O   LEU X  15     201.689 202.900 289.441  1.00  0.00           O
ATOM    238  N   LEU X  16     203.080 203.275 287.779  1.00  0.00           N
ATOM    239  H   LEU X  16     203.199 203.595 286.829  1.00  0.00           H
ATOM    240  CA  LEU X  16     204.183 203.712 288.749  1.00  0.00           C
ATOM    241  HA  LEU X  16     204.436 202.869 289.392  1.00  0.00           H
ATOM    242  CB  LEU X  16     205.503 204.082 287.964  1.00  0.00           C
ATOM    243  HB2 LEU X  16     205.694 203.258 287.276  1.00  0.00           H
ATOM    244  HB3 LEU X  16     205.274 205.015 287.450  1.00  0.00           H
ATOM    245  CG  LEU X  16     206.793 204.403 288.830  1.00  0.00           C
ATOM    246  HG  LEU X  16     206.453 205.186 289.507  1.00  0.00           H
ATOM    247  CD1 LEU X  16     207.323 203.303 289.652  1.00  0.00           C
ATOM    248 HD11 LEU X  16     207.611 202.512 288.960  1.00  0.00           H
ATOM    249 HD12 LEU X  16     208.258 203.613 290.118  1.00  0.00           H
ATOM    250 HD13 LEU X  16     206.524 203.055 290.351  1.00  0.00           H
ATOM    251  CD2 LEU X  16     207.884 204.972 287.959  1.00  0.00           C
ATOM    252 HD21 LEU X  16     208.007 204.155 287.248  1.00  0.00           H
ATOM    253 HD22 LEU X  16     207.581 205.933 287.545  1.00  0.00           H
ATOM    254 HD23 LEU X  16     208.752 205.169 288.588  1.00  0.00           H
ATOM    255  C   LEU X  16     203.870 204.863 289.718  1.00  0.00           C
ATOM    256  O   LEU X  16     203.925 204.794 290.993  1.00  0.00           O
ATOM    257  N   LEU X  17     203.329 205.934 289.190  1.00  0.00           N
ATOM    258  H   LEU X  17     203.336 205.971 288.180  1.00  0.00           H
ATOM    259  CA  LEU X  17     202.851 207.141 289.924  1.00  0.00           C
ATOM    260  HA  LEU X  17     203.629 207.607 290.531  1.00  0.00           H
ATOM    261  CB  LEU X  17     202.496 208.312 288.905  1.00  0.00           C
ATOM    262  HB2 LEU X  17     201.714 207.967 288.229  1.00  0.00           H
ATOM    263  HB3 LEU X  17     202.254 209.148 289.562  1.00  0.00           H
ATOM    264  CG  LEU X  17     203.693 208.836 288.069  1.00  0.00           C
ATOM    265  HG  LEU X  17     204.025 207.900 287.620  1.00  0.00           H
ATOM    266  CD1 LEU X  17     203.089 209.851 287.101  1.00  0.00           C
ATOM    267 HD11 LEU X  17     202.633 209.288 286.287  1.00  0.00           H
ATOM    268 HD12 LEU X  17     202.288 210.447 287.537  1.00  0.00           H
ATOM    269 HD13 LEU X  17     203.984 210.313 286.685  1.00  0.00           H
ATOM    270  CD2 LEU X  17     204.746 209.501 289.045  1.00  0.00           C
ATOM    271 HD21 LEU X  17     205.303 208.672 289.482  1.00  0.00           H
ATOM    272 HD22 LEU X  17     205.359 210.268 288.572  1.00  0.00           H
ATOM    273 HD23 LEU X  17     204.091 209.924 289.807  1.00  0.00           H
ATOM    274  C   LEU X  17     201.626 206.844 290.806  1.00  0.00           C
ATOM    275  O   LEU X  17     201.494 207.467 291.854  1.00  0.00           O
ATOM    276  N   SER X  18     200.946 205.721 290.512  1.00  0.00           N
ATOM    277  H   SER X  18     201.100 205.258 289.628  1.00  0.00           H
ATOM    278  CA  SER X  18     199.972 205.144 291.475  1.00  0.00           C
ATOM    279  HA  SER X  18     199.517 206.023 291.931  1.00  0.00           H
ATOM    280  CB  SER X  18     198.824 204.483 290.735  1.00  0.00           C
ATOM    281  HB2 SER X  18     199.086 203.480 290.398  1.00  0.00           H
ATOM    282  HB3 SER X  18     198.018 204.326 291.452  1.00  0.00           H
ATOM    283  OG  SER X  18     198.405 205.242 289.651  1.00  0.00           O
ATOM    284  HG  SER X  18     199.140 205.183 289.036  1.00  0.00           H
ATOM    285  C   SER X  18     200.435 204.240 292.616  1.00  0.00           C
ATOM    286  O   SER X  18     200.142 204.531 293.753  1.00  0.00           O
ATOM    287  N   LEU X  19     201.319 203.277 292.314  1.00  0.00           N
ATOM    288  H   LEU X  19     201.372 203.008 291.342  1.00  0.00           H
ATOM    289  CA  LEU X  19     202.186 202.590 293.290  1.00  0.00           C
ATOM    290  HA  LEU X  19     201.555 202.020 293.972  1.00  0.00           H
ATOM    291  CB  LEU X  19     203.104 201.661 292.436  1.00  0.00           C
ATOM    292  HB2 LEU X  19     202.518 201.026 291.773  1.00  0.00           H
ATOM    293  HB3 LEU X  19     203.667 202.325 291.780  1.00  0.00           H
ATOM    294  CG  LEU X  19     204.165 200.838 293.206  1.00  0.00           C
ATOM    295  HG  LEU X  19     204.860 201.432 293.799  1.00  0.00           H
ATOM    296  CD1 LEU X  19     203.509 199.761 294.080  1.00  0.00           C
ATOM    297 HD11 LEU X  19     204.267 199.170 294.594  1.00  0.00           H
ATOM    298 HD12 LEU X  19     202.901 200.284 294.818  1.00  0.00           H
ATOM    299 HD13 LEU X  19     202.802 199.118 293.555  1.00  0.00           H
ATOM    300  CD2 LEU X  19     204.991 200.136 292.115  1.00  0.00           C
ATOM    301 HD21 LEU X  19     205.823 199.528 292.472  1.00  0.00           H
ATOM    302 HD22 LEU X  19     204.392 199.508 291.455  1.00  0.00           H
ATOM    303 HD23 LEU X  19     205.483 200.946 291.577  1.00  0.00           H
ATOM    304  C   LEU X  19     202.862 203.597 294.251  1.00  0.00           C
ATOM    305  O   LEU X  19     203.149 203.144 295.336  1.00  0.00           O
ATOM    306  N   TRP X  20     203.120 204.845 293.908  1.00  0.00           N
ATOM    307  H   TRP X  20     203.016 205.099 292.936  1.00  0.00           H
ATOM    308  CA  TRP X  20     203.869 205.781 294.751  1.00  0.00           C
ATOM    309  HA  TRP X  20     204.202 205.191 295.605  1.00  0.00           H
ATOM    310  CB  TRP X  20     205.105 206.219 293.951  1.00  0.00           C
ATOM    311  HB2 TRP X  20     204.684 206.626 293.032  1.00  0.00           H
ATOM    312  HB3 TRP X  20     205.510 207.043 294.539  1.00  0.00           H
ATOM    313  CG  TRP X  20     206.192 205.222 293.690  1.00  0.00           C
ATOM    314  CD1 TRP X  20     206.407 203.967 294.175  1.00  0.00           C
ATOM    315  HD1 TRP X  20     205.724 203.474 294.851  1.00  0.00           H
ATOM    316  NE1 TRP X  20     207.674 203.539 293.817  1.00  0.00           N
ATOM    317  HE1 TRP X  20     208.101 202.647 294.023  1.00  0.00           H
ATOM    318  CE2 TRP X  20     208.276 204.455 293.019  1.00  0.00           C
ATOM    319  CZ2 TRP X  20     209.491 204.417 292.319  1.00  0.00           C
ATOM    320  HZ2 TRP X  20     210.201 203.618 292.479  1.00  0.00           H
ATOM    321  CH2 TRP X  20     209.734 205.404 291.391  1.00  0.00           C
ATOM    322  HH2 TRP X  20     210.613 205.247 290.782  1.00  0.00           H
ATOM    323  CZ3 TRP X  20     208.859 206.505 291.196  1.00  0.00           C
ATOM    324  HZ3 TRP X  20     209.135 207.270 290.486  1.00  0.00           H
ATOM    325  CE3 TRP X  20     207.702 206.562 291.976  1.00  0.00           C
ATOM    326  HE3 TRP X  20     206.979 207.332 291.752  1.00  0.00           H
ATOM    327  CD2 TRP X  20     207.357 205.490 292.839  1.00  0.00           C
ATOM    328  C   TRP X  20     203.014 206.957 295.337  1.00  0.00           C
ATOM    329  O   TRP X  20     203.562 208.012 295.682  1.00  0.00           O
ATOM    330  N   ARG X  21     201.673 206.743 295.239  1.00  0.00           N
ATOM    331  H   ARG X  21     201.276 205.960 294.741  1.00  0.00           H
ATOM    332  CA  ARG X  21     200.775 207.770 295.730  1.00  0.00           C
ATOM    333  HA  ARG X  21     201.285 208.270 296.554  1.00  0.00           H
ATOM    334  CB  ARG X  21     200.546 208.799 294.609  1.00  0.00           C
ATOM    335  HB2 ARG X  21     201.472 209.081 294.108  1.00  0.00           H
ATOM    336  HB3 ARG X  21     199.884 208.354 293.867  1.00  0.00           H
ATOM    337  CG  ARG X  21     199.884 210.076 295.161  1.00  0.00           C
ATOM    338  HG2 ARG X  21     199.441 210.552 294.287  1.00  0.00           H
ATOM    339  HG3 ARG X  21     199.115 209.793 295.879  1.00  0.00           H
ATOM    340  CD  ARG X  21     200.893 211.152 295.651  1.00  0.00           C
ATOM    341  HD2 ARG X  21     201.638 211.287 294.868  1.00  0.00           H
ATOM    342  HD3 ARG X  21     200.392 212.118 295.719  1.00  0.00           H
ATOM    343  NE  ARG X  21     201.568 210.772 296.910  1.00  0.00           N
ATOM    344  HE  ARG X  21     202.472 210.324 296.872  1.00  0.00           H
ATOM    345  CZ  ARG X  21     201.206 211.058 298.140  1.00  0.00           C
ATOM    346  NH1 ARG X  21     202.001 210.864 299.134  1.00  0.00           N
ATOM    347 HH11 ARG X  21     202.997 210.866 298.965  1.00  0.00           H
ATOM    348 HH12 ARG X  21     201.637 210.891 300.075  1.00  0.00           H
ATOM    349  NH2 ARG X  21     200.045 211.520 298.407  1.00  0.00           N
ATOM    350 HH21 ARG X  21     199.465 211.958 297.706  1.00  0.00           H
ATOM    351 HH22 ARG X  21     199.803 211.800 299.346  1.00  0.00           H
ATOM    352  C   ARG X  21     199.453 207.206 296.361  1.00  0.00           C
ATOM    353  O   ARG X  21     199.071 207.620 297.499  1.00  0.00           O
ATOM    354  N   GLN X  22     198.785 206.373 295.580  1.00  0.00           N
ATOM    355  H   GLN X  22     199.164 206.084 294.690  1.00  0.00           H
ATOM    356  CA  GLN X  22     197.384 206.020 295.755  1.00  0.00           C
ATOM    357  HA  GLN X  22     196.866 206.841 296.250  1.00  0.00           H
ATOM    358  CB  GLN X  22     196.805 205.733 294.391  1.00  0.00           C
ATOM    359  HB2 GLN X  22     197.322 204.890 293.933  1.00  0.00           H
ATOM    360  HB3 GLN X  22     195.770 205.399 294.458  1.00  0.00           H
ATOM    361  CG  GLN X  22     196.809 206.855 293.298  1.00  0.00           C
ATOM    362  HG2 GLN X  22     197.833 207.075 292.997  1.00  0.00           H
ATOM    363  HG3 GLN X  22     196.240 206.525 292.429  1.00  0.00           H
ATOM    364  CD  GLN X  22     196.161 208.136 293.896  1.00  0.00           C
ATOM    365  OE1 GLN X  22     196.842 208.947 294.480  1.00  0.00           O
ATOM    366  NE2 GLN X  22     194.872 208.269 293.853  1.00  0.00           N
ATOM    367 HE21 GLN X  22     194.572 209.071 294.389  1.00  0.00           H
ATOM    368 HE22 GLN X  22     194.263 207.663 293.321  1.00  0.00           H
ATOM    369  C   GLN X  22     197.294 204.839 296.721  1.00  0.00           C
ATOM    370  O   GLN X  22     196.259 204.159 296.781  1.00  0.00           O
ATOM    371  N   SER X  23     198.366 204.463 297.452  1.00  0.00           N
ATOM    372  H   SER X  23     199.197 205.034 297.501  1.00  0.00           H
ATOM    373  CA  SER X  23     198.233 203.492 298.619  1.00  0.00           C
ATOM    374  HA  SER X  23     197.694 202.610 298.273  1.00  0.00           H
ATOM    375  CB  SER X  23     199.651 203.021 299.021  1.00  0.00           C
ATOM    376  HB2 SER X  23     200.224 202.487 298.263  1.00  0.00           H
ATOM    377  HB3 SER X  23     200.198 203.929 299.275  1.00  0.00           H
ATOM    378  OG  SER X  23     199.525 202.301 300.275  1.00  0.00           O
ATOM    379  HG  SER X  23     199.182 201.425 300.082  1.00  0.00           H
ATOM    380  C   SER X  23     197.354 204.118 299.731  1.00  0.00           C
ATOM    381  O   SER X  23     197.623 205.146 300.298  1.00  0.00           O
ATOM    382  N   SER X  24     196.306 203.456 300.122  1.00  0.00           N
ATOM    383  H   SER X  24     195.992 202.696 299.536  1.00  0.00           H
ATOM    384  CA  SER X  24     195.392 203.789 301.179  1.00  0.00           C
ATOM    385  HA  SER X  24     195.847 204.425 301.938  1.00  0.00           H
ATOM    386  CB  SER X  24     194.306 204.548 300.579  1.00  0.00           C
ATOM    387  HB2 SER X  24     193.588 204.919 301.311  1.00  0.00           H
ATOM    388  HB3 SER X  24     194.747 205.376 300.025  1.00  0.00           H
ATOM    389  OG  SER X  24     193.444 203.774 299.790  1.00  0.00           O
ATOM    390  HG  SER X  24     192.739 204.382 299.553  1.00  0.00           H
ATOM    391  C   SER X  24     194.885 202.676 301.963  1.00  0.00           C
ATOM    392  O   SER X  24     193.853 202.762 302.686  1.00  0.00           O
ATOM    393  N   GLY X  25     195.532 201.531 301.929  1.00  0.00           N
ATOM    394  H   GLY X  25     196.347 201.450 301.338  1.00  0.00           H
ATOM    395  CA  GLY X  25     195.094 200.311 302.556  1.00  0.00           C
ATOM    396  HA2 GLY X  25     195.009 200.353 303.642  1.00  0.00           H
ATOM    397  HA3 GLY X  25     194.118 200.000 302.182  1.00  0.00           H
ATOM    398  C   GLY X  25     196.011 199.104 302.221  1.00  0.00           C
ATOM    399  O   GLY X  25     196.978 199.320 301.468  1.00  0.00           O
ATOM    400  N   ARG X  26     195.875 197.902 302.890  1.00  0.00           N
ATOM    401  H   ARG X  26     195.365 198.046 303.749  1.00  0.00           H
ATOM    402  CA  ARG X  26     196.593 196.647 302.555  1.00  0.00           C
ATOM    403  HA  ARG X  26     197.665 196.799 302.434  1.00  0.00           H
ATOM    404  CB  ARG X  26     196.500 195.619 303.762  1.00  0.00           C
ATOM    405  HB2 ARG X  26     196.664 196.138 304.706  1.00  0.00           H
ATOM    406  HB3 ARG X  26     195.498 195.203 303.862  1.00  0.00           H
ATOM    407  CG  ARG X  26     197.563 194.448 303.577  1.00  0.00           C
ATOM    408  HG2 ARG X  26     197.684 194.098 302.552  1.00  0.00           H
ATOM    409  HG3 ARG X  26     198.506 194.897 303.888  1.00  0.00           H
ATOM    410  CD  ARG X  26     197.085 193.273 304.443  1.00  0.00           C
ATOM    411  HD2 ARG X  26     196.819 193.568 305.458  1.00  0.00           H
ATOM    412  HD3 ARG X  26     196.304 192.639 304.023  1.00  0.00           H
ATOM    413  NE  ARG X  26     198.253 192.388 304.647  1.00  0.00           N
ATOM    414  HE  ARG X  26     198.894 192.646 305.384  1.00  0.00           H
ATOM    415  CZ  ARG X  26     198.699 191.304 303.999  1.00  0.00           C
ATOM    416  NH1 ARG X  26     197.990 190.761 303.042  1.00  0.00           N
ATOM    417 HH11 ARG X  26     197.060 191.081 302.810  1.00  0.00           H
ATOM    418 HH12 ARG X  26     198.316 189.925 302.579  1.00  0.00           H
ATOM    419  NH2 ARG X  26     199.846 190.775 304.286  1.00  0.00           N
ATOM    420 HH21 ARG X  26     200.519 191.366 304.754  1.00  0.00           H
ATOM    421 HH22 ARG X  26     200.230 189.937 303.874  1.00  0.00           H
ATOM    422  C   ARG X  26     196.014 196.114 301.219  1.00  0.00           C
ATOM    423  O   ARG X  26     194.896 195.596 301.092  1.00  0.00           O
ATOM    424  N   GLY X  27     196.863 196.270 300.195  1.00  0.00           N
ATOM    425  H   GLY X  27     197.695 196.791 300.435  1.00  0.00           H
ATOM    426  CA  GLY X  27     196.570 195.816 298.759  1.00  0.00           C
ATOM    427  HA2 GLY X  27     197.553 195.754 298.293  1.00  0.00           H
ATOM    428  HA3 GLY X  27     196.199 194.792 298.809  1.00  0.00           H
ATOM    429  C   GLY X  27     195.738 196.797 297.955  1.00  0.00           C
ATOM    430  O   GLY X  27     195.031 196.448 297.045  1.00  0.00           O
ATOM    431  N   LYS X  28     195.778 198.085 298.413  1.00  0.00           N
ATOM    432  H   LYS X  28     196.355 198.379 299.189  1.00  0.00           H
ATOM    433  CA  LYS X  28     194.836 199.159 297.921  1.00  0.00           C
ATOM    434  HA  LYS X  28     194.558 198.943 296.889  1.00  0.00           H
ATOM    435  CB  LYS X  28     193.509 199.147 298.674  1.00  0.00           C
ATOM    436  HB2 LYS X  28     193.105 198.137 298.741  1.00  0.00           H
ATOM    437  HB3 LYS X  28     193.680 199.392 299.722  1.00  0.00           H
ATOM    438  CG  LYS X  28     192.437 200.047 298.080  1.00  0.00           C
ATOM    439  HG2 LYS X  28     192.893 200.992 297.785  1.00  0.00           H
ATOM    440  HG3 LYS X  28     192.124 199.546 297.164  1.00  0.00           H
ATOM    441  CD  LYS X  28     191.192 200.357 298.898  1.00  0.00           C
ATOM    442  HD2 LYS X  28     190.582 201.127 298.426  1.00  0.00           H
ATOM    443  HD3 LYS X  28     190.552 199.474 298.865  1.00  0.00           H
ATOM    444  CE  LYS X  28     191.286 200.702 300.393  1.00  0.00           C
ATOM    445  HE2 LYS X  28     190.327 200.412 300.822  1.00  0.00           H
ATOM    446  HE3 LYS X  28     192.038 200.124 300.929  1.00  0.00           H
ATOM    447  NZ  LYS X  28     191.348 202.208 300.652  1.00  0.00           N
ATOM    448  HZ1 LYS X  28     192.285 202.579 300.576  1.00  0.00           H
ATOM    449  HZ2 LYS X  28     191.101 202.361 301.620  1.00  0.00           H
ATOM    450  HZ3 LYS X  28     190.750 202.743 300.039  1.00  0.00           H
ATOM    451  C   LYS X  28     195.485 200.517 297.928  1.00  0.00           C
ATOM    452  O   LYS X  28     196.016 200.950 298.964  1.00  0.00           O
ATOM    453  N   LEU X  29     195.255 201.311 296.856  1.00  0.00           N
ATOM    454  H   LEU X  29     195.278 202.304 297.039  1.00  0.00           H
ATOM    455  CA  LEU X  29     195.046 200.896 295.454  1.00  0.00           C
ATOM    456  HA  LEU X  29     194.139 200.292 295.448  1.00  0.00           H
ATOM    457  CB  LEU X  29     194.749 202.147 294.632  1.00  0.00           C
ATOM    458  HB2 LEU X  29     193.824 202.618 294.966  1.00  0.00           H
ATOM    459  HB3 LEU X  29     195.484 202.929 294.821  1.00  0.00           H
ATOM    460  CG  LEU X  29     194.535 201.832 293.110  1.00  0.00           C
ATOM    461  HG  LEU X  29     195.331 201.204 292.710  1.00  0.00           H
ATOM    462  CD1 LEU X  29     194.771 203.104 292.179  1.00  0.00           C
ATOM    463 HD11 LEU X  29     195.740 203.544 292.415  1.00  0.00           H
ATOM    464 HD12 LEU X  29     194.688 202.932 291.106  1.00  0.00           H
ATOM    465 HD13 LEU X  29     194.072 203.856 292.547  1.00  0.00           H
ATOM    466  CD2 LEU X  29     193.255 201.100 292.812  1.00  0.00           C
ATOM    467 HD21 LEU X  29     193.200 200.769 291.775  1.00  0.00           H
ATOM    468 HD22 LEU X  29     193.268 200.211 293.443  1.00  0.00           H
ATOM    469 HD23 LEU X  29     192.430 201.799 292.951  1.00  0.00           H
ATOM    470  C   LEU X  29     196.103 199.982 294.870  1.00  0.00           C
ATOM    471  O   LEU X  29     195.734 199.025 294.297  1.00  0.00           O
ATOM    472  N   PRO X  30     197.427 200.296 294.881  1.00  0.00           N
ATOM    473  CD  PRO X  30     197.962 201.606 295.281  1.00  0.00           C
ATOM    474  HD2 PRO X  30     197.543 201.938 296.232  1.00  0.00           H
ATOM    475  HD3 PRO X  30     197.822 202.185 294.368  1.00  0.00           H
ATOM    476  CG  PRO X  30     199.491 201.376 295.510  1.00  0.00           C
ATOM    477  HG2 PRO X  30     199.744 200.860 296.436  1.00  0.00           H
ATOM    478  HG3 PRO X  30     200.115 202.261 295.389  1.00  0.00           H
ATOM    479  CB  PRO X  30     199.697 200.303 294.430  1.00  0.00           C
ATOM    480  HB2 PRO X  30     200.670 199.818 294.505  1.00  0.00           H
ATOM    481  HB3 PRO X  30     199.647 200.805 293.464  1.00  0.00           H
ATOM    482  CA  PRO X  30     198.515 199.349 294.526  1.00  0.00           C
ATOM    483  HA  PRO X  30     198.254 198.875 293.580  1.00  0.00           H
ATOM    484  C   PRO X  30     198.807 198.210 295.582  1.00  0.00           C
ATOM    485  O   PRO X  30     198.155 198.133 296.637  1.00  0.00           O
ATOM    486  N   PRO X  31     199.787 197.297 295.275  1.00  0.00           N
ATOM    487  CD  PRO X  31     200.186 196.913 293.933  1.00  0.00           C
ATOM    488  HD2 PRO X  31     201.001 197.533 293.559  1.00  0.00           H
ATOM    489  HD3 PRO X  31     199.316 196.845 293.280  1.00  0.00           H
ATOM    490  CG  PRO X  31     200.853 195.558 294.176  1.00  0.00           C
ATOM    491  HG2 PRO X  31     201.496 195.235 293.358  1.00  0.00           H
ATOM    492  HG3 PRO X  31     200.125 194.782 294.415  1.00  0.00           H
ATOM    493  CB  PRO X  31     201.616 195.725 295.487  1.00  0.00           C
ATOM    494  HB2 PRO X  31     202.484 196.379 295.401  1.00  0.00           H
ATOM    495  HB3 PRO X  31     201.764 194.734 295.917  1.00  0.00           H
ATOM    496  CA  PRO X  31     200.531 196.534 296.328  1.00  0.00           C
ATOM    497  HA  PRO X  31     199.956 195.797 296.887  1.00  0.00           H
ATOM    498  C   PRO X  31     201.108 197.495 297.411  1.00  0.00           C
ATOM    499  O   PRO X  31     200.853 198.722 297.368  1.00  0.00           O
ATOM    500  N   GLY X  32     201.881 196.932 298.295  1.00  0.00           N
ATOM    501  H   GLY X  32     202.219 195.993 298.139  1.00  0.00           H
ATOM    502  CA  GLY X  32     202.753 197.783 299.115  1.00  0.00           C
ATOM    503  HA2 GLY X  32     202.169 198.318 299.864  1.00  0.00           H
ATOM    504  HA3 GLY X  32     203.522 197.251 299.677  1.00  0.00           H
ATOM    505  C   GLY X  32     203.372 198.869 298.286  1.00  0.00           C
ATOM    506  O   GLY X  32     204.055 198.440 297.311  1.00  0.00           O
ATOM    507  N   PRO X  33     203.428 200.172 298.617  1.00  0.00           N
ATOM    508  CD  PRO X  33     202.849 200.702 299.806  1.00  0.00           C
ATOM    509  HD2 PRO X  33     203.107 200.189 300.733  1.00  0.00           H
ATOM    510  HD3 PRO X  33     201.765 200.781 299.717  1.00  0.00           H
ATOM    511  CG  PRO X  33     203.158 202.186 299.883  1.00  0.00           C
ATOM    512  HG2 PRO X  33     204.076 202.283 300.462  1.00  0.00           H
ATOM    513  HG3 PRO X  33     202.329 202.764 300.290  1.00  0.00           H
ATOM    514  CB  PRO X  33     203.376 202.571 298.405  1.00  0.00           C
ATOM    515  HB2 PRO X  33     203.920 203.497 298.215  1.00  0.00           H
ATOM    516  HB3 PRO X  33     202.386 202.661 297.959  1.00  0.00           H
ATOM    517  CA  PRO X  33     204.050 201.282 297.864  1.00  0.00           C
ATOM    518  HA  PRO X  33     203.791 201.209 296.807  1.00  0.00           H
ATOM    519  C   PRO X  33     205.601 201.305 297.945  1.00  0.00           C
ATOM    520  O   PRO X  33     206.284 202.096 298.644  1.00  0.00           O
ATOM    521  N   THR X  34     206.230 200.375 297.239  1.00  0.00           N
ATOM    522  H   THR X  34     205.659 199.706 296.742  1.00  0.00           H
ATOM    523  CA  THR X  34     207.631 199.992 297.340  1.00  0.00           C
ATOM    524  HA  THR X  34     207.880 199.872 298.395  1.00  0.00           H
ATOM    525  CB  THR X  34     207.802 198.571 296.788  1.00  0.00           C
ATOM    526  HB  THR X  34     207.133 197.920 297.350  1.00  0.00           H
ATOM    527  CG2 THR X  34     207.614 198.499 295.306  1.00  0.00           C
ATOM    528 HG21 THR X  34     206.664 198.919 294.973  1.00  0.00           H
ATOM    529 HG22 THR X  34     207.640 197.440 295.053  1.00  0.00           H
ATOM    530 HG23 THR X  34     208.421 198.999 294.771  1.00  0.00           H
ATOM    531  OG1 THR X  34     209.085 198.046 296.985  1.00  0.00           O
ATOM    532  HG1 THR X  34     209.652 198.418 296.305  1.00  0.00           H
ATOM    533  C   THR X  34     208.556 201.058 296.733  1.00  0.00           C
ATOM    534  O   THR X  34     208.253 201.508 295.618  1.00  0.00           O
ATOM    535  N   PRO X  35     209.651 201.498 297.387  1.00  0.00           N
ATOM    536  CD  PRO X  35     210.039 201.057 298.680  1.00  0.00           C
ATOM    537  HD2 PRO X  35     210.144 199.972 298.653  1.00  0.00           H
ATOM    538  HD3 PRO X  35     209.316 201.514 299.356  1.00  0.00           H
ATOM    539  CG  PRO X  35     211.461 201.664 298.952  1.00  0.00           C
ATOM    540  HG2 PRO X  35     212.205 200.872 298.863  1.00  0.00           H
ATOM    541  HG3 PRO X  35     211.588 202.088 299.948  1.00  0.00           H
ATOM    542  CB  PRO X  35     211.633 202.597 297.717  1.00  0.00           C
ATOM    543  HB2 PRO X  35     212.683 202.706 297.444  1.00  0.00           H
ATOM    544  HB3 PRO X  35     211.282 203.594 297.985  1.00  0.00           H
ATOM    545  CA  PRO X  35     210.702 202.080 296.595  1.00  0.00           C
ATOM    546  HA  PRO X  35     210.188 202.887 296.074  1.00  0.00           H
ATOM    547  C   PRO X  35     211.403 200.969 295.706  1.00  0.00           C
ATOM    548  O   PRO X  35     211.035 199.782 295.676  1.00  0.00           O
ATOM    549  N   LEU X  36     212.389 201.479 294.933  1.00  0.00           N
ATOM    550  H   LEU X  36     212.641 202.456 294.967  1.00  0.00           H
ATOM    551  CA  LEU X  36     213.306 200.660 294.219  1.00  0.00           C
ATOM    552  HA  LEU X  36     213.119 199.627 294.511  1.00  0.00           H
ATOM    553  CB  LEU X  36     213.233 201.000 292.717  1.00  0.00           C
ATOM    554  HB2 LEU X  36     213.699 201.927 292.383  1.00  0.00           H
ATOM    555  HB3 LEU X  36     213.797 200.224 292.199  1.00  0.00           H
ATOM    556  CG  LEU X  36     211.848 200.988 292.008  1.00  0.00           C
ATOM    557  HG  LEU X  36     211.328 201.818 292.487  1.00  0.00           H
ATOM    558  CD1 LEU X  36     212.013 201.373 290.558  1.00  0.00           C
ATOM    559 HD11 LEU X  36     212.608 200.603 290.066  1.00  0.00           H
ATOM    560 HD12 LEU X  36     211.048 201.468 290.059  1.00  0.00           H
ATOM    561 HD13 LEU X  36     212.582 202.295 290.444  1.00  0.00           H
ATOM    562  CD2 LEU X  36     211.049 199.669 292.000  1.00  0.00           C
ATOM    563 HD21 LEU X  36     210.932 199.220 292.986  1.00  0.00           H
ATOM    564 HD22 LEU X  36     210.056 200.104 291.884  1.00  0.00           H
ATOM    565 HD23 LEU X  36     211.367 198.981 291.217  1.00  0.00           H
ATOM    566  C   LEU X  36     214.774 200.923 294.718  1.00  0.00           C
ATOM    567  O   LEU X  36     215.140 202.072 294.939  1.00  0.00           O
ATOM    568  N   PRO X  37     215.718 200.030 294.354  1.00  0.00           N
ATOM    569  CD  PRO X  37     215.484 198.711 293.815  1.00  0.00           C
ATOM    570  HD2 PRO X  37     215.677 198.764 292.743  1.00  0.00           H
ATOM    571  HD3 PRO X  37     214.513 198.301 294.092  1.00  0.00           H
ATOM    572  CG  PRO X  37     216.537 197.809 294.440  1.00  0.00           C
ATOM    573  HG2 PRO X  37     216.572 196.845 293.934  1.00  0.00           H
ATOM    574  HG3 PRO X  37     216.253 197.658 295.482  1.00  0.00           H
ATOM    575  CB  PRO X  37     217.728 198.775 294.311  1.00  0.00           C
ATOM    576  HB2 PRO X  37     217.940 198.677 293.247  1.00  0.00           H
ATOM    577  HB3 PRO X  37     218.526 198.462 294.984  1.00  0.00           H
ATOM    578  CA  PRO X  37     217.165 200.186 294.590  1.00  0.00           C
ATOM    579  HA  PRO X  37     217.426 200.432 295.619  1.00  0.00           H
ATOM    580  C   PRO X  37     217.932 201.144 293.612  1.00  0.00           C
ATOM    581  O   PRO X  37     219.176 201.130 293.472  1.00  0.00           O
ATOM    582  N   VAL X  38     217.156 201.925 292.857  1.00  0.00           N
ATOM    583  H   VAL X  38     216.236 201.928 293.274  1.00  0.00           H
ATOM    584  CA  VAL X  38     217.707 203.112 292.208  1.00  0.00           C
ATOM    585  HA  VAL X  38     218.757 203.223 292.480  1.00  0.00           H
ATOM    586  CB  VAL X  38     217.815 202.911 290.613  1.00  0.00           C
ATOM    587  HB  VAL X  38     218.160 201.886 290.477  1.00  0.00           H
ATOM    588  CG1 VAL X  38     216.517 202.929 289.873  1.00  0.00           C
ATOM    589 HG11 VAL X  38     215.708 202.321 290.279  1.00  0.00           H
ATOM    590 HG12 VAL X  38     216.151 203.955 289.894  1.00  0.00           H
ATOM    591 HG13 VAL X  38     216.644 202.617 288.837  1.00  0.00           H
ATOM    592  CG2 VAL X  38     218.739 203.921 290.004  1.00  0.00           C
ATOM    593 HG21 VAL X  38     219.206 203.531 289.099  1.00  0.00           H
ATOM    594 HG22 VAL X  38     219.533 204.126 290.722  1.00  0.00           H
ATOM    595 HG23 VAL X  38     218.341 204.908 289.769  1.00  0.00           H
ATOM    596  C   VAL X  38     216.988 204.458 292.520  1.00  0.00           C
ATOM    597  O   VAL X  38     217.560 205.523 292.419  1.00  0.00           O
ATOM    598  N   ILE X  39     215.725 204.369 293.035  1.00  0.00           N
ATOM    599  H   ILE X  39     215.419 203.415 293.170  1.00  0.00           H
ATOM    600  CA  ILE X  39     214.818 205.564 293.307  1.00  0.00           C
ATOM    601  HA  ILE X  39     215.411 206.355 293.768  1.00  0.00           H
ATOM    602  CB  ILE X  39     214.112 206.159 292.022  1.00  0.00           C
ATOM    603  HB  ILE X  39     214.925 206.684 291.520  1.00  0.00           H
ATOM    604  CG2 ILE X  39     213.612 205.069 291.070  1.00  0.00           C
ATOM    605 HG21 ILE X  39     212.855 205.469 290.395  1.00  0.00           H
ATOM    606 HG22 ILE X  39     213.249 204.182 291.589  1.00  0.00           H
ATOM    607 HG23 ILE X  39     214.375 204.792 290.344  1.00  0.00           H
ATOM    608  CG1 ILE X  39     213.180 207.267 292.196  1.00  0.00           C
ATOM    609 HG12 ILE X  39     212.169 206.944 292.445  1.00  0.00           H
ATOM    610 HG13 ILE X  39     213.429 207.900 293.047  1.00  0.00           H
ATOM    611  CD1 ILE X  39     212.965 208.268 290.975  1.00  0.00           C
ATOM    612 HD11 ILE X  39     212.259 209.060 291.222  1.00  0.00           H
ATOM    613 HD12 ILE X  39     213.914 208.752 290.746  1.00  0.00           H
ATOM    614 HD13 ILE X  39     212.563 207.771 290.092  1.00  0.00           H
ATOM    615  C   ILE X  39     213.767 205.222 294.383  1.00  0.00           C
ATOM    616  O   ILE X  39     213.074 204.252 294.148  1.00  0.00           O
ATOM    617  N   GLY X  40     213.643 206.097 295.438  1.00  0.00           N
ATOM    618  H   GLY X  40     214.348 206.800 295.607  1.00  0.00           H
ATOM    619  CA  GLY X  40     212.690 205.894 296.499  1.00  0.00           C
ATOM    620  HA2 GLY X  40     212.724 204.819 296.674  1.00  0.00           H
ATOM    621  HA3 GLY X  40     212.885 206.243 297.513  1.00  0.00           H
ATOM    622  C   GLY X  40     211.221 206.239 296.138  1.00  0.00           C
ATOM    623  O   GLY X  40     210.830 206.954 295.198  1.00  0.00           O
ATOM    624  N   ASN X  41     210.426 205.876 297.129  1.00  0.00           N
ATOM    625  H   ASN X  41     210.867 205.502 297.956  1.00  0.00           H
ATOM    626  CA  ASN X  41     209.014 206.193 297.196  1.00  0.00           C
ATOM    627  HA  ASN X  41     208.532 206.365 296.234  1.00  0.00           H
ATOM    628  CB  ASN X  41     208.280 205.022 297.926  1.00  0.00           C
ATOM    629  HB2 ASN X  41     207.233 205.311 298.010  1.00  0.00           H
ATOM    630  HB3 ASN X  41     208.383 204.097 297.358  1.00  0.00           H
ATOM    631  CG  ASN X  41     208.717 204.741 299.280  1.00  0.00           C
ATOM    632  OD1 ASN X  41     209.748 205.213 299.758  1.00  0.00           O
ATOM    633  ND2 ASN X  41     207.987 204.018 300.085  1.00  0.00           N
ATOM    634 HD21 ASN X  41     208.080 203.926 301.087  1.00  0.00           H
ATOM    635 HD22 ASN X  41     207.279 203.438 299.657  1.00  0.00           H
ATOM    636  C   ASN X  41     208.865 207.575 297.890  1.00  0.00           C
ATOM    637  O   ASN X  41     207.831 207.738 298.558  1.00  0.00           O
ATOM    638  N   ILE X  42     209.791 208.563 297.697  1.00  0.00           N
ATOM    639  H   ILE X  42     210.615 208.357 297.151  1.00  0.00           H
ATOM    640  CA  ILE X  42     209.721 209.946 298.131  1.00  0.00           C
ATOM    641  HA  ILE X  42     209.725 210.008 299.219  1.00  0.00           H
ATOM    642  CB  ILE X  42     210.859 210.784 297.696  1.00  0.00           C
ATOM    643  HB  ILE X  42     211.707 210.137 297.923  1.00  0.00           H
ATOM    644  CG2 ILE X  42     210.861 211.172 296.152  1.00  0.00           C
ATOM    645 HG21 ILE X  42     211.684 211.876 296.032  1.00  0.00           H
ATOM    646 HG22 ILE X  42     209.868 211.521 295.867  1.00  0.00           H
ATOM    647 HG23 ILE X  42     211.022 210.247 295.598  1.00  0.00           H
ATOM    648  CG1 ILE X  42     211.003 212.086 298.468  1.00  0.00           C
ATOM    649 HG12 ILE X  42     211.733 212.713 297.957  1.00  0.00           H
ATOM    650 HG13 ILE X  42     210.033 212.580 298.428  1.00  0.00           H
ATOM    651  CD1 ILE X  42     211.397 211.923 299.965  1.00  0.00           C
ATOM    652 HD11 ILE X  42     211.595 212.840 300.521  1.00  0.00           H
ATOM    653 HD12 ILE X  42     210.607 211.327 300.420  1.00  0.00           H
ATOM    654 HD13 ILE X  42     212.262 211.268 300.064  1.00  0.00           H
ATOM    655  C   ILE X  42     208.346 210.572 297.741  1.00  0.00           C
ATOM    656  O   ILE X  42     207.856 211.327 298.526  1.00  0.00           O
ATOM    657  N   LEU X  43     207.741 210.283 296.593  1.00  0.00           N
ATOM    658  H   LEU X  43     208.183 209.609 295.985  1.00  0.00           H
ATOM    659  CA  LEU X  43     206.462 210.759 296.164  1.00  0.00           C
ATOM    660  HA  LEU X  43     206.521 211.841 296.286  1.00  0.00           H
ATOM    661  CB  LEU X  43     206.225 210.306 294.705  1.00  0.00           C
ATOM    662  HB2 LEU X  43     207.100 210.621 294.136  1.00  0.00           H
ATOM    663  HB3 LEU X  43     206.027 209.235 294.675  1.00  0.00           H
ATOM    664  CG  LEU X  43     204.975 210.888 294.104  1.00  0.00           C
ATOM    665  HG  LEU X  43     204.141 210.773 294.797  1.00  0.00           H
ATOM    666  CD1 LEU X  43     205.250 212.423 293.717  1.00  0.00           C
ATOM    667 HD11 LEU X  43     204.325 212.823 293.301  1.00  0.00           H
ATOM    668 HD12 LEU X  43     205.470 212.959 294.640  1.00  0.00           H
ATOM    669 HD13 LEU X  43     206.038 212.531 292.971  1.00  0.00           H
ATOM    670  CD2 LEU X  43     204.752 210.294 292.726  1.00  0.00           C
ATOM    671 HD21 LEU X  43     205.584 210.542 292.068  1.00  0.00           H
ATOM    672 HD22 LEU X  43     204.450 209.247 292.757  1.00  0.00           H
ATOM    673 HD23 LEU X  43     203.896 210.758 292.236  1.00  0.00           H
ATOM    674  C   LEU X  43     205.262 210.319 297.102  1.00  0.00           C
ATOM    675  O   LEU X  43     204.328 211.032 297.389  1.00  0.00           O
ATOM    676  N   GLN X  44     205.433 209.118 297.682  1.00  0.00           N
ATOM    677  H   GLN X  44     206.175 208.550 297.301  1.00  0.00           H
ATOM    678  CA  GLN X  44     204.528 208.602 298.733  1.00  0.00           C
ATOM    679  HA  GLN X  44     203.525 208.969 298.510  1.00  0.00           H
ATOM    680  CB  GLN X  44     204.435 207.044 298.830  1.00  0.00           C
ATOM    681  HB2 GLN X  44     204.280 206.644 297.828  1.00  0.00           H
ATOM    682  HB3 GLN X  44     205.385 206.540 299.010  1.00  0.00           H
ATOM    683  CG  GLN X  44     203.350 206.436 299.804  1.00  0.00           C
ATOM    684  HG2 GLN X  44     203.635 205.423 300.086  1.00  0.00           H
ATOM    685  HG3 GLN X  44     203.437 207.057 300.696  1.00  0.00           H
ATOM    686  CD  GLN X  44     202.003 206.476 299.042  1.00  0.00           C
ATOM    687  OE1 GLN X  44     201.587 205.635 298.273  1.00  0.00           O
ATOM    688  NE2 GLN X  44     201.301 207.545 299.201  1.00  0.00           N
ATOM    689 HE21 GLN X  44     200.437 207.582 298.680  1.00  0.00           H
ATOM    690 HE22 GLN X  44     201.420 208.199 299.961  1.00  0.00           H
ATOM    691  C   GLN X  44     205.039 209.181 300.046  1.00  0.00           C
ATOM    692  O   GLN X  44     204.627 210.253 300.468  1.00  0.00           O
ATOM    693  N   ILE X  45     205.991 208.557 300.812  1.00  0.00           N
ATOM    694  H   ILE X  45     206.413 207.735 300.402  1.00  0.00           H
ATOM    695  CA  ILE X  45     206.382 208.825 302.172  1.00  0.00           C
ATOM    696  HA  ILE X  45     205.563 208.600 302.856  1.00  0.00           H
ATOM    697  CB  ILE X  45     207.487 207.846 302.643  1.00  0.00           C
ATOM    698  HB  ILE X  45     207.159 206.839 302.386  1.00  0.00           H
ATOM    699  CG2 ILE X  45     208.910 208.120 301.951  1.00  0.00           C
ATOM    700 HG21 ILE X  45     209.387 207.156 301.778  1.00  0.00           H
ATOM    701 HG22 ILE X  45     209.584 208.723 302.560  1.00  0.00           H
ATOM    702 HG23 ILE X  45     208.792 208.653 301.007  1.00  0.00           H
ATOM    703  CG1 ILE X  45     207.783 207.874 304.144  1.00  0.00           C
ATOM    704 HG12 ILE X  45     207.970 208.873 304.538  1.00  0.00           H
ATOM    705 HG13 ILE X  45     206.884 207.519 304.648  1.00  0.00           H
ATOM    706  CD1 ILE X  45     208.982 207.065 304.827  1.00  0.00           C
ATOM    707 HD11 ILE X  45     208.926 207.038 305.916  1.00  0.00           H
ATOM    708 HD12 ILE X  45     209.057 206.102 304.321  1.00  0.00           H
ATOM    709 HD13 ILE X  45     209.910 207.598 304.618  1.00  0.00           H
ATOM    710  C   ILE X  45     206.799 210.285 302.466  1.00  0.00           C
ATOM    711  O   ILE X  45     206.465 210.804 303.534  1.00  0.00           O
ATOM    712  N   GLY X  46     207.517 210.994 301.520  1.00  0.00           N
ATOM    713  H   GLY X  46     207.574 210.644 300.575  1.00  0.00           H
ATOM    714  CA  GLY X  46     207.926 212.399 301.709  1.00  0.00           C
ATOM    715  HA2 GLY X  46     208.306 212.623 302.705  1.00  0.00           H
ATOM    716  HA3 GLY X  46     208.681 212.640 300.960  1.00  0.00           H
ATOM    717  C   GLY X  46     206.781 213.419 301.334  1.00  0.00           C
ATOM    718  O   GLY X  46     207.117 214.602 301.072  1.00  0.00           O
ATOM    719  N   ILE X  47     205.561 212.976 301.061  1.00  0.00           N
ATOM    720  H   ILE X  47     205.314 211.998 301.100  1.00  0.00           H
ATOM    721  CA  ILE X  47     204.303 213.844 300.949  1.00  0.00           C
ATOM    722  HA  ILE X  47     204.572 214.841 301.297  1.00  0.00           H
ATOM    723  CB  ILE X  47     203.974 213.942 299.471  1.00  0.00           C
ATOM    724  HB  ILE X  47     203.854 212.887 299.225  1.00  0.00           H
ATOM    725  CG2 ILE X  47     202.682 214.783 299.272  1.00  0.00           C
ATOM    726 HG21 ILE X  47     202.314 214.906 298.254  1.00  0.00           H
ATOM    727 HG22 ILE X  47     202.872 215.752 299.735  1.00  0.00           H
ATOM    728 HG23 ILE X  47     201.904 214.482 299.973  1.00  0.00           H
ATOM    729  CG1 ILE X  47     205.142 214.426 298.658  1.00  0.00           C
ATOM    730 HG12 ILE X  47     205.217 215.475 298.946  1.00  0.00           H
ATOM    731 HG13 ILE X  47     206.057 213.834 298.665  1.00  0.00           H
ATOM    732  CD1 ILE X  47     204.652 214.462 297.158  1.00  0.00           C
ATOM    733 HD11 ILE X  47     204.083 215.371 296.963  1.00  0.00           H
ATOM    734 HD12 ILE X  47     205.525 214.444 296.504  1.00  0.00           H
ATOM    735 HD13 ILE X  47     204.088 213.572 296.877  1.00  0.00           H
ATOM    736  C   ILE X  47     203.291 213.206 301.885  1.00  0.00           C
ATOM    737  O   ILE X  47     202.335 212.500 301.585  1.00  0.00           O
ATOM    738  N   LYS X  48     203.591 213.580 303.188  1.00  0.00           N
ATOM    739  H   LYS X  48     204.477 214.044 303.329  1.00  0.00           H
ATOM    740  CA  LYS X  48     202.708 213.421 304.387  1.00  0.00           C
ATOM    741  HA  LYS X  48     203.198 213.857 305.257  1.00  0.00           H
ATOM    742  CB  LYS X  48     201.373 214.168 304.164  1.00  0.00           C
ATOM    743  HB2 LYS X  48     201.039 214.002 303.139  1.00  0.00           H
ATOM    744  HB3 LYS X  48     200.580 213.728 304.769  1.00  0.00           H
ATOM    745  CG  LYS X  48     201.525 215.702 304.485  1.00  0.00           C
ATOM    746  HG2 LYS X  48     202.031 215.808 305.445  1.00  0.00           H
ATOM    747  HG3 LYS X  48     202.197 216.037 303.695  1.00  0.00           H
ATOM    748  CD  LYS X  48     200.183 216.369 304.304  1.00  0.00           C
ATOM    749  HD2 LYS X  48     199.754 216.130 303.330  1.00  0.00           H
ATOM    750  HD3 LYS X  48     199.454 216.060 305.054  1.00  0.00           H
ATOM    751  CE  LYS X  48     200.401 217.885 304.535  1.00  0.00           C
ATOM    752  HE2 LYS X  48     200.753 218.092 305.546  1.00  0.00           H
ATOM    753  HE3 LYS X  48     201.137 218.349 303.878  1.00  0.00           H
ATOM    754  NZ  LYS X  48     199.122 218.663 304.467  1.00  0.00           N
ATOM    755  HZ1 LYS X  48     199.286 219.628 304.715  1.00  0.00           H
ATOM    756  HZ2 LYS X  48     198.411 218.389 305.130  1.00  0.00           H
ATOM    757  HZ3 LYS X  48     198.636 218.772 303.589  1.00  0.00           H
ATOM    758  C   LYS X  48     202.348 211.995 304.777  1.00  0.00           C
ATOM    759  O   LYS X  48     201.723 211.779 305.841  1.00  0.00           O
ATOM    760  N   ASP X  49     202.773 210.954 304.024  1.00  0.00           N
ATOM    761  H   ASP X  49     203.238 211.257 303.181  1.00  0.00           H
ATOM    762  CA  ASP X  49     202.481 209.551 304.319  1.00  0.00           C
ATOM    763  HA  ASP X  49     201.608 209.502 304.970  1.00  0.00           H
ATOM    764  CB  ASP X  49     202.123 208.829 303.095  1.00  0.00           C
ATOM    765  HB2 ASP X  49     202.990 208.707 302.445  1.00  0.00           H
ATOM    766  HB3 ASP X  49     201.807 207.822 303.367  1.00  0.00           H
ATOM    767  CG  ASP X  49     200.822 209.388 302.470  1.00  0.00           C
ATOM    768  OD1 ASP X  49     199.998 210.059 303.122  1.00  0.00           O
ATOM    769  OD2 ASP X  49     200.690 209.300 301.250  1.00  0.00           O
ATOM    770  C   ASP X  49     203.539 208.899 305.180  1.00  0.00           C
ATOM    771  O   ASP X  49     203.902 207.723 304.989  1.00  0.00           O
ATOM    772  N   ILE X  50     204.219 209.695 305.955  1.00  0.00           N
ATOM    773  H   ILE X  50     203.946 210.667 306.005  1.00  0.00           H
ATOM    774  CA  ILE X  50     205.449 209.268 306.665  1.00  0.00           C
ATOM    775  HA  ILE X  50     206.049 208.808 305.880  1.00  0.00           H
ATOM    776  CB  ILE X  50     206.301 210.471 307.243  1.00  0.00           C
ATOM    777  HB  ILE X  50     206.494 211.180 306.439  1.00  0.00           H
ATOM    778  CG2 ILE X  50     205.690 211.369 308.382  1.00  0.00           C
ATOM    779 HG21 ILE X  50     204.737 211.743 308.008  1.00  0.00           H
ATOM    780 HG22 ILE X  50     206.419 212.150 308.600  1.00  0.00           H
ATOM    781 HG23 ILE X  50     205.523 210.737 309.253  1.00  0.00           H
ATOM    782  CG1 ILE X  50     207.556 209.785 307.696  1.00  0.00           C
ATOM    783 HG12 ILE X  50     207.521 209.548 308.760  1.00  0.00           H
ATOM    784 HG13 ILE X  50     207.730 208.831 307.199  1.00  0.00           H
ATOM    785  CD1 ILE X  50     208.814 210.684 307.512  1.00  0.00           C
ATOM    786 HD11 ILE X  50     208.894 211.418 308.313  1.00  0.00           H
ATOM    787 HD12 ILE X  50     209.743 210.114 307.553  1.00  0.00           H
ATOM    788 HD13 ILE X  50     208.787 211.198 306.551  1.00  0.00           H
ATOM    789  C   ILE X  50     205.200 208.087 307.620  1.00  0.00           C
ATOM    790  O   ILE X  50     205.636 207.018 307.242  1.00  0.00           O
ATOM    791  N   SER X  51     204.481 208.199 308.721  1.00  0.00           N
ATOM    792  H   SER X  51     204.176 209.110 309.033  1.00  0.00           H
ATOM    793  CA  SER X  51     204.144 207.078 309.632  1.00  0.00           C
ATOM    794  HA  SER X  51     205.087 206.574 309.846  1.00  0.00           H
ATOM    795  CB  SER X  51     203.518 207.692 310.879  1.00  0.00           C
ATOM    796  HB2 SER X  51     202.430 207.745 310.830  1.00  0.00           H
ATOM    797  HB3 SER X  51     203.636 206.993 311.707  1.00  0.00           H
ATOM    798  OG  SER X  51     203.896 209.001 311.358  1.00  0.00           O
ATOM    799  HG  SER X  51     203.820 209.007 312.315  1.00  0.00           H
ATOM    800  C   SER X  51     203.241 206.043 309.089  1.00  0.00           C
ATOM    801  O   SER X  51     203.538 204.884 309.131  1.00  0.00           O
ATOM    802  N   LYS X  52     202.298 206.473 308.244  1.00  0.00           N
ATOM    803  H   LYS X  52     202.217 207.469 308.103  1.00  0.00           H
ATOM    804  CA  LYS X  52     201.224 205.692 307.629  1.00  0.00           C
ATOM    805  HA  LYS X  52     200.951 204.884 308.308  1.00  0.00           H
ATOM    806  CB  LYS X  52     199.978 206.528 307.184  1.00  0.00           C
ATOM    807  HB2 LYS X  52     200.049 207.444 307.770  1.00  0.00           H
ATOM    808  HB3 LYS X  52     200.163 206.773 306.138  1.00  0.00           H
ATOM    809  CG  LYS X  52     198.652 205.828 307.458  1.00  0.00           C
ATOM    810  HG2 LYS X  52     198.639 204.876 306.926  1.00  0.00           H
ATOM    811  HG3 LYS X  52     198.699 205.575 308.517  1.00  0.00           H
ATOM    812  CD  LYS X  52     197.404 206.613 307.205  1.00  0.00           C
ATOM    813  HD2 LYS X  52     197.434 207.554 307.755  1.00  0.00           H
ATOM    814  HD3 LYS X  52     197.318 206.800 306.134  1.00  0.00           H
ATOM    815  CE  LYS X  52     196.188 205.748 307.608  1.00  0.00           C
ATOM    816  HE2 LYS X  52     196.054 204.817 307.057  1.00  0.00           H
ATOM    817  HE3 LYS X  52     196.398 205.489 308.645  1.00  0.00           H
ATOM    818  NZ  LYS X  52     194.904 206.484 307.461  1.00  0.00           N
ATOM    819  HZ1 LYS X  52     194.834 206.862 306.527  1.00  0.00           H
ATOM    820  HZ2 LYS X  52     194.887 207.243 308.127  1.00  0.00           H
ATOM    821  HZ3 LYS X  52     194.069 205.977 307.717  1.00  0.00           H
ATOM    822  C   LYS X  52     201.687 204.869 306.436  1.00  0.00           C
ATOM    823  O   LYS X  52     201.279 203.698 306.273  1.00  0.00           O
ATOM    824  N   SER X  53     202.671 205.313 305.599  1.00  0.00           N
ATOM    825  H   SER X  53     202.951 206.273 305.741  1.00  0.00           H
ATOM    826  CA  SER X  53     203.269 204.394 304.529  1.00  0.00           C
ATOM    827  HA  SER X  53     202.489 203.737 304.143  1.00  0.00           H
ATOM    828  CB  SER X  53     203.753 205.137 303.316  1.00  0.00           C
ATOM    829  HB2 SER X  53     203.713 204.468 302.456  1.00  0.00           H
ATOM    830  HB3 SER X  53     203.070 205.962 303.110  1.00  0.00           H
ATOM    831  OG  SER X  53     205.011 205.717 303.612  1.00  0.00           O
ATOM    832  HG  SER X  53     204.791 206.387 304.263  1.00  0.00           H
ATOM    833  C   SER X  53     204.368 203.447 305.113  1.00  0.00           C
ATOM    834  O   SER X  53     204.486 202.359 304.619  1.00  0.00           O
ATOM    835  N   LEU X  54     204.934 203.809 306.232  1.00  0.00           N
ATOM    836  H   LEU X  54     204.900 204.797 306.437  1.00  0.00           H
ATOM    837  CA  LEU X  54     205.789 202.841 306.905  1.00  0.00           C
ATOM    838  HA  LEU X  54     206.387 202.401 306.107  1.00  0.00           H
ATOM    839  CB  LEU X  54     206.573 203.495 308.064  1.00  0.00           C
ATOM    840  HB2 LEU X  54     205.965 204.139 308.700  1.00  0.00           H
ATOM    841  HB3 LEU X  54     207.029 202.706 308.661  1.00  0.00           H
ATOM    842  CG  LEU X  54     207.712 204.315 307.462  1.00  0.00           C
ATOM    843  HG  LEU X  54     207.268 204.914 306.667  1.00  0.00           H
ATOM    844  CD1 LEU X  54     208.247 205.204 308.561  1.00  0.00           C
ATOM    845 HD11 LEU X  54     207.501 205.862 309.008  1.00  0.00           H
ATOM    846 HD12 LEU X  54     208.648 204.555 309.339  1.00  0.00           H
ATOM    847 HD13 LEU X  54     208.997 205.873 308.139  1.00  0.00           H
ATOM    848  CD2 LEU X  54     208.881 203.449 306.998  1.00  0.00           C
ATOM    849 HD21 LEU X  54     209.738 204.044 306.684  1.00  0.00           H
ATOM    850 HD22 LEU X  54     209.151 202.826 307.850  1.00  0.00           H
ATOM    851 HD23 LEU X  54     208.512 202.813 306.193  1.00  0.00           H
ATOM    852  C   LEU X  54     204.945 201.707 307.482  1.00  0.00           C
ATOM    853  O   LEU X  54     205.252 200.546 307.192  1.00  0.00           O
ATOM    854  N   THR X  55     203.819 202.031 308.090  1.00  0.00           N
ATOM    855  H   THR X  55     203.848 202.968 308.466  1.00  0.00           H
ATOM    856  CA  THR X  55     202.761 200.990 308.451  1.00  0.00           C
ATOM    857  HA  THR X  55     203.135 200.379 309.271  1.00  0.00           H
ATOM    858  CB  THR X  55     201.518 201.667 309.087  1.00  0.00           C
ATOM    859  HB  THR X  55     201.104 202.358 308.353  1.00  0.00           H
ATOM    860  CG2 THR X  55     200.414 200.745 309.678  1.00  0.00           C
ATOM    861 HG21 THR X  55     200.802 200.224 310.553  1.00  0.00           H
ATOM    862 HG22 THR X  55     200.155 200.010 308.916  1.00  0.00           H
ATOM    863 HG23 THR X  55     199.465 201.208 309.949  1.00  0.00           H
ATOM    864  OG1 THR X  55     202.002 202.487 310.101  1.00  0.00           O
ATOM    865  HG1 THR X  55     201.319 203.089 310.403  1.00  0.00           H
ATOM    866  C   THR X  55     202.438 200.207 307.207  1.00  0.00           C
ATOM    867  O   THR X  55     202.590 198.960 307.238  1.00  0.00           O
ATOM    868  N   ASN X  56     202.095 200.801 306.014  1.00  0.00           N
ATOM    869  H   ASN X  56     202.058 201.810 306.026  1.00  0.00           H
ATOM    870  CA  ASN X  56     201.649 200.010 304.901  1.00  0.00           C
ATOM    871  HA  ASN X  56     200.684 199.645 305.254  1.00  0.00           H
ATOM    872  CB  ASN X  56     201.397 200.966 303.727  1.00  0.00           C
ATOM    873  HB2 ASN X  56     200.923 201.925 303.938  1.00  0.00           H
ATOM    874  HB3 ASN X  56     202.329 201.183 303.205  1.00  0.00           H
ATOM    875  CG  ASN X  56     200.503 200.237 302.797  1.00  0.00           C
ATOM    876  OD1 ASN X  56     200.851 199.412 301.957  1.00  0.00           O
ATOM    877  ND2 ASN X  56     199.255 200.668 302.822  1.00  0.00           N
ATOM    878 HD21 ASN X  56     198.627 200.155 302.221  1.00  0.00           H
ATOM    879 HD22 ASN X  56     198.917 201.370 303.465  1.00  0.00           H
ATOM    880  C   ASN X  56     202.632 198.941 304.468  1.00  0.00           C
ATOM    881  O   ASN X  56     202.274 197.800 304.298  1.00  0.00           O
ATOM    882  N   LEU X  57     203.945 199.338 304.350  1.00  0.00           N
ATOM    883  H   LEU X  57     204.128 200.247 304.750  1.00  0.00           H
ATOM    884  CA  LEU X  57     205.011 198.408 303.991  1.00  0.00           C
ATOM    885  HA  LEU X  57     204.846 197.959 303.011  1.00  0.00           H
ATOM    886  CB  LEU X  57     206.332 199.176 303.906  1.00  0.00           C
ATOM    887  HB2 LEU X  57     206.463 199.862 304.743  1.00  0.00           H
ATOM    888  HB3 LEU X  57     207.051 198.360 303.831  1.00  0.00           H
ATOM    889  CG  LEU X  57     206.568 200.022 302.616  1.00  0.00           C
ATOM    890  HG  LEU X  57     205.792 200.786 302.573  1.00  0.00           H
ATOM    891  CD1 LEU X  57     207.845 200.789 302.634  1.00  0.00           C
ATOM    892 HD11 LEU X  57     207.748 201.572 303.386  1.00  0.00           H
ATOM    893 HD12 LEU X  57     208.706 200.187 302.923  1.00  0.00           H
ATOM    894 HD13 LEU X  57     207.945 201.210 301.634  1.00  0.00           H
ATOM    895  CD2 LEU X  57     206.461 199.146 301.341  1.00  0.00           C
ATOM    896 HD21 LEU X  57     207.125 198.284 301.399  1.00  0.00           H
ATOM    897 HD22 LEU X  57     205.465 198.831 301.033  1.00  0.00           H
ATOM    898 HD23 LEU X  57     206.791 199.752 300.497  1.00  0.00           H
ATOM    899  C   LEU X  57     205.115 197.239 305.001  1.00  0.00           C
ATOM    900  O   LEU X  57     205.024 196.011 304.698  1.00  0.00           O
ATOM    901  N   SER X  58     205.203 197.511 306.274  1.00  0.00           N
ATOM    902  H   SER X  58     205.241 198.467 306.597  1.00  0.00           H
ATOM    903  CA  SER X  58     205.386 196.510 307.312  1.00  0.00           C
ATOM    904  HA  SER X  58     206.359 196.068 307.096  1.00  0.00           H
ATOM    905  CB  SER X  58     205.341 197.176 308.687  1.00  0.00           C
ATOM    906  HB2 SER X  58     205.614 196.419 309.423  1.00  0.00           H
ATOM    907  HB3 SER X  58     206.036 198.010 308.790  1.00  0.00           H
ATOM    908  OG  SER X  58     204.084 197.617 309.064  1.00  0.00           O
ATOM    909  HG  SER X  58     203.650 198.156 308.399  1.00  0.00           H
ATOM    910  C   SER X  58     204.343 195.354 307.215  1.00  0.00           C
ATOM    911  O   SER X  58     204.648 194.149 307.523  1.00  0.00           O
ATOM    912  N   LYS X  59     203.100 195.635 306.824  1.00  0.00           N
ATOM    913  H   LYS X  59     202.797 196.565 306.575  1.00  0.00           H
ATOM    914  CA  LYS X  59     202.064 194.550 306.540  1.00  0.00           C
ATOM    915  HA  LYS X  59     202.070 193.982 307.470  1.00  0.00           H
ATOM    916  CB  LYS X  59     200.719 195.190 306.283  1.00  0.00           C
ATOM    917  HB2 LYS X  59     200.823 195.563 305.264  1.00  0.00           H
ATOM    918  HB3 LYS X  59     199.971 194.412 306.133  1.00  0.00           H
ATOM    919  CG  LYS X  59     200.262 196.202 307.329  1.00  0.00           C
ATOM    920  HG2 LYS X  59     200.577 197.239 307.213  1.00  0.00           H
ATOM    921  HG3 LYS X  59     199.194 196.393 307.224  1.00  0.00           H
ATOM    922  CD  LYS X  59     200.365 195.678 308.799  1.00  0.00           C
ATOM    923  HD2 LYS X  59     199.841 194.728 308.901  1.00  0.00           H
ATOM    924  HD3 LYS X  59     201.427 195.437 308.859  1.00  0.00           H
ATOM    925  CE  LYS X  59     199.911 196.692 309.834  1.00  0.00           C
ATOM    926  HE2 LYS X  59     200.355 197.681 309.725  1.00  0.00           H
ATOM    927  HE3 LYS X  59     198.861 196.759 309.547  1.00  0.00           H
ATOM    928  NZ  LYS X  59     200.066 196.218 311.249  1.00  0.00           N
ATOM    929  HZ1 LYS X  59     199.596 195.330 311.357  1.00  0.00           H
ATOM    930  HZ2 LYS X  59     199.624 196.965 311.765  1.00  0.00           H
ATOM    931  HZ3 LYS X  59     201.045 196.113 311.471  1.00  0.00           H
ATOM    932  C   LYS X  59     202.316 193.531 305.475  1.00  0.00           C
ATOM    933  O   LYS X  59     201.649 192.500 305.446  1.00  0.00           O
ATOM    934  N   VAL X  60     203.356 193.693 304.623  1.00  0.00           N
ATOM    935  H   VAL X  60     203.909 194.538 304.643  1.00  0.00           H
ATOM    936  CA  VAL X  60     203.755 192.689 303.638  1.00  0.00           C
ATOM    937  HA  VAL X  60     203.360 191.731 303.977  1.00  0.00           H
ATOM    938  CB  VAL X  60     203.323 193.122 302.202  1.00  0.00           C
ATOM    939  HB  VAL X  60     203.741 192.384 301.517  1.00  0.00           H
ATOM    940  CG1 VAL X  60     201.832 193.069 302.019  1.00  0.00           C
ATOM    941 HG11 VAL X  60     201.291 193.796 302.624  1.00  0.00           H
ATOM    942 HG12 VAL X  60     201.554 193.281 300.986  1.00  0.00           H
ATOM    943 HG13 VAL X  60     201.407 192.123 302.355  1.00  0.00           H
ATOM    944  CG2 VAL X  60     203.815 194.500 301.764  1.00  0.00           C
ATOM    945 HG21 VAL X  60     203.648 194.773 300.722  1.00  0.00           H
ATOM    946 HG22 VAL X  60     204.897 194.480 301.894  1.00  0.00           H
ATOM    947 HG23 VAL X  60     203.546 195.331 302.415  1.00  0.00           H
ATOM    948  C   VAL X  60     205.304 192.542 303.705  1.00  0.00           C
ATOM    949  O   VAL X  60     205.742 191.615 303.035  1.00  0.00           O
ATOM    950  N   TYR X  61     206.054 193.286 304.436  1.00  0.00           N
ATOM    951  H   TYR X  61     205.671 194.124 304.850  1.00  0.00           H
ATOM    952  CA  TYR X  61     207.524 193.113 304.406  1.00  0.00           C
ATOM    953  HA  TYR X  61     207.826 192.263 303.794  1.00  0.00           H
ATOM    954  CB  TYR X  61     208.213 194.293 303.758  1.00  0.00           C
ATOM    955  HB2 TYR X  61     207.822 195.136 304.327  1.00  0.00           H
ATOM    956  HB3 TYR X  61     209.293 194.214 303.880  1.00  0.00           H
ATOM    957  CG  TYR X  61     208.129 194.586 302.281  1.00  0.00           C
ATOM    958  CD1 TYR X  61     208.571 195.874 301.840  1.00  0.00           C
ATOM    959  HD1 TYR X  61     208.849 196.656 302.532  1.00  0.00           H
ATOM    960  CE1 TYR X  61     208.625 196.189 300.512  1.00  0.00           C
ATOM    961  HE1 TYR X  61     208.875 197.196 300.215  1.00  0.00           H
ATOM    962  CZ  TYR X  61     208.297 195.243 299.494  1.00  0.00           C
ATOM    963  OH  TYR X  61     208.212 195.590 298.174  1.00  0.00           O
ATOM    964  HH  TYR X  61     208.574 196.473 298.064  1.00  0.00           H
ATOM    965  CE2 TYR X  61     207.896 193.970 299.886  1.00  0.00           C
ATOM    966  HE2 TYR X  61     207.749 193.133 299.219  1.00  0.00           H
ATOM    967  CD2 TYR X  61     207.740 193.687 301.280  1.00  0.00           C
ATOM    968  HD2 TYR X  61     207.456 192.740 301.714  1.00  0.00           H
ATOM    969  C   TYR X  61     208.150 192.906 305.806  1.00  0.00           C
ATOM    970  O   TYR X  61     209.265 192.468 305.785  1.00  0.00           O
ATOM    971  N   GLY X  62     207.375 193.022 306.895  1.00  0.00           N
ATOM    972  H   GLY X  62     206.476 193.446 306.720  1.00  0.00           H
ATOM    973  CA  GLY X  62     207.756 192.656 308.282  1.00  0.00           C
ATOM    974  HA2 GLY X  62     206.887 192.184 308.739  1.00  0.00           H
ATOM    975  HA3 GLY X  62     208.621 191.997 308.204  1.00  0.00           H
ATOM    976  C   GLY X  62     208.123 193.832 309.187  1.00  0.00           C
ATOM    977  O   GLY X  62     207.931 194.989 308.812  1.00  0.00           O
ATOM    978  N   PRO X  63     208.677 193.528 310.417  1.00  0.00           N
ATOM    979  CD  PRO X  63     208.918 192.276 310.986  1.00  0.00           C
ATOM    980  HD2 PRO X  63     209.397 191.559 310.319  1.00  0.00           H
ATOM    981  HD3 PRO X  63     207.997 191.846 311.380  1.00  0.00           H
ATOM    982  CG  PRO X  63     209.827 192.420 312.203  1.00  0.00           C
ATOM    983  HG2 PRO X  63     210.874 192.569 311.936  1.00  0.00           H
ATOM    984  HG3 PRO X  63     209.777 191.596 312.914  1.00  0.00           H
ATOM    985  CB  PRO X  63     209.296 193.729 312.810  1.00  0.00           C
ATOM    986  HB2 PRO X  63     209.982 194.228 313.494  1.00  0.00           H
ATOM    987  HB3 PRO X  63     208.352 193.547 313.324  1.00  0.00           H
ATOM    988  CA  PRO X  63     209.015 194.542 311.449  1.00  0.00           C
ATOM    989  HA  PRO X  63     208.168 195.228 311.438  1.00  0.00           H
ATOM    990  C   PRO X  63     210.234 195.372 311.152  1.00  0.00           C
ATOM    991  O   PRO X  63     210.538 196.311 311.862  1.00  0.00           O
ATOM    992  N   VAL X  64     210.939 195.071 310.065  1.00  0.00           N
ATOM    993  H   VAL X  64     210.622 194.336 309.449  1.00  0.00           H
ATOM    994  CA  VAL X  64     212.045 195.876 309.558  1.00  0.00           C
ATOM    995  HA  VAL X  64     212.026 196.938 309.800  1.00  0.00           H
ATOM    996  CB  VAL X  64     213.256 195.367 310.294  1.00  0.00           C
ATOM    997  HB  VAL X  64     213.084 195.397 311.370  1.00  0.00           H
ATOM    998  CG1 VAL X  64     213.725 194.018 309.885  1.00  0.00           C
ATOM    999 HG11 VAL X  64     214.001 193.937 308.834  1.00  0.00           H
ATOM   1000 HG12 VAL X  64     214.517 193.606 310.511  1.00  0.00           H
ATOM   1001 HG13 VAL X  64     212.920 193.283 309.917  1.00  0.00           H
ATOM   1002  CG2 VAL X  64     214.362 196.361 310.159  1.00  0.00           C
ATOM   1003 HG21 VAL X  64     214.811 196.322 309.167  1.00  0.00           H
ATOM   1004 HG22 VAL X  64     215.157 196.253 310.897  1.00  0.00           H
ATOM   1005 HG23 VAL X  64     213.863 197.305 310.379  1.00  0.00           H
ATOM   1006  C   VAL X  64     212.197 195.724 308.045  1.00  0.00           C
ATOM   1007  O   VAL X  64     211.882 194.657 307.508  1.00  0.00           O
ATOM   1008  N   PHE X  65     212.609 196.758 307.338  1.00  0.00           N
ATOM   1009  H   PHE X  65     212.858 197.602 307.833  1.00  0.00           H
ATOM   1010  CA  PHE X  65     212.763 196.799 305.890  1.00  0.00           C
ATOM   1011  HA  PHE X  65     213.402 195.941 305.679  1.00  0.00           H
ATOM   1012  CB  PHE X  65     211.441 196.645 305.146  1.00  0.00           C
ATOM   1013  HB2 PHE X  65     211.558 196.784 304.071  1.00  0.00           H
ATOM   1014  HB3 PHE X  65     211.079 195.624 305.266  1.00  0.00           H
ATOM   1015  CG  PHE X  65     210.296 197.582 305.696  1.00  0.00           C
ATOM   1016  CD1 PHE X  65     209.972 198.787 305.022  1.00  0.00           C
ATOM   1017  HD1 PHE X  65     210.558 199.089 304.167  1.00  0.00           H
ATOM   1018  CE1 PHE X  65     209.247 199.752 305.668  1.00  0.00           C
ATOM   1019  HE1 PHE X  65     209.186 200.738 305.232  1.00  0.00           H
ATOM   1020  CZ  PHE X  65     208.392 199.291 306.722  1.00  0.00           C
ATOM   1021  HZ  PHE X  65     207.554 199.922 306.982  1.00  0.00           H
ATOM   1022  CE2 PHE X  65     208.594 198.050 307.338  1.00  0.00           C
ATOM   1023  HE2 PHE X  65     207.991 197.698 308.163  1.00  0.00           H
ATOM   1024  CD2 PHE X  65     209.587 197.184 306.821  1.00  0.00           C
ATOM   1025  HD2 PHE X  65     209.696 196.194 307.238  1.00  0.00           H
ATOM   1026  C   PHE X  65     213.511 198.087 305.466  1.00  0.00           C
ATOM   1027  O   PHE X  65     214.199 198.712 306.231  1.00  0.00           O
ATOM   1028  N   THR X  66     213.741 198.388 304.214  1.00  0.00           N
ATOM   1029  H   THR X  66     213.289 197.924 303.439  1.00  0.00           H
ATOM   1030  CA  THR X  66     214.679 199.480 303.851  1.00  0.00           C
ATOM   1031  HA  THR X  66     215.134 200.023 304.680  1.00  0.00           H
ATOM   1032  CB  THR X  66     215.783 198.933 303.010  1.00  0.00           C
ATOM   1033  HB  THR X  66     216.337 199.766 302.578  1.00  0.00           H
ATOM   1034  CG2 THR X  66     216.854 198.081 303.704  1.00  0.00           C
ATOM   1035 HG21 THR X  66     217.199 197.295 303.032  1.00  0.00           H
ATOM   1036 HG22 THR X  66     216.459 197.599 304.598  1.00  0.00           H
ATOM   1037 HG23 THR X  66     217.727 198.706 303.892  1.00  0.00           H
ATOM   1038  OG1 THR X  66     215.263 198.079 302.021  1.00  0.00           O
ATOM   1039  HG1 THR X  66     214.649 198.596 301.495  1.00  0.00           H
ATOM   1040  C   THR X  66     213.937 200.473 302.942  1.00  0.00           C
ATOM   1041  O   THR X  66     213.286 199.960 302.044  1.00  0.00           O
ATOM   1042  N   LEU X  67     213.968 201.746 303.276  1.00  0.00           N
ATOM   1043  H   LEU X  67     214.546 201.863 304.096  1.00  0.00           H
ATOM   1044  CA  LEU X  67     213.733 202.807 302.340  1.00  0.00           C
ATOM   1045  HA  LEU X  67     212.835 202.584 301.764  1.00  0.00           H
ATOM   1046  CB  LEU X  67     213.423 204.022 303.142  1.00  0.00           C
ATOM   1047  HB2 LEU X  67     214.187 204.070 303.918  1.00  0.00           H
ATOM   1048  HB3 LEU X  67     213.501 204.912 302.518  1.00  0.00           H
ATOM   1049  CG  LEU X  67     212.071 203.923 303.827  1.00  0.00           C
ATOM   1050  HG  LEU X  67     211.946 202.989 304.376  1.00  0.00           H
ATOM   1051  CD1 LEU X  67     211.873 205.081 304.824  1.00  0.00           C
ATOM   1052 HD11 LEU X  67     210.901 204.921 305.291  1.00  0.00           H
ATOM   1053 HD12 LEU X  67     212.580 205.140 305.652  1.00  0.00           H
ATOM   1054 HD13 LEU X  67     211.887 206.029 304.288  1.00  0.00           H
ATOM   1055  CD2 LEU X  67     210.885 203.972 302.857  1.00  0.00           C
ATOM   1056 HD21 LEU X  67     210.932 204.803 302.153  1.00  0.00           H
ATOM   1057 HD22 LEU X  67     210.726 203.041 302.313  1.00  0.00           H
ATOM   1058 HD23 LEU X  67     209.972 204.253 303.381  1.00  0.00           H
ATOM   1059  C   LEU X  67     214.900 203.034 301.464  1.00  0.00           C
ATOM   1060  O   LEU X  67     215.969 202.444 301.613  1.00  0.00           O
ATOM   1061  N   TYR X  68     214.906 203.985 300.460  1.00  0.00           N
ATOM   1062  H   TYR X  68     214.145 204.630 300.298  1.00  0.00           H
ATOM   1063  CA  TYR X  68     216.026 204.253 299.596  1.00  0.00           C
ATOM   1064  HA  TYR X  68     216.958 203.801 299.935  1.00  0.00           H
ATOM   1065  CB  TYR X  68     215.749 203.628 298.206  1.00  0.00           C
ATOM   1066  HB2 TYR X  68     215.527 202.576 298.385  1.00  0.00           H
ATOM   1067  HB3 TYR X  68     214.879 204.073 297.723  1.00  0.00           H
ATOM   1068  CG  TYR X  68     216.954 203.688 297.245  1.00  0.00           C
ATOM   1069  CD1 TYR X  68     217.227 204.766 296.416  1.00  0.00           C
ATOM   1070  HD1 TYR X  68     216.710 205.703 296.562  1.00  0.00           H
ATOM   1071  CE1 TYR X  68     218.383 204.763 295.585  1.00  0.00           C
ATOM   1072  HE1 TYR X  68     218.590 205.623 294.966  1.00  0.00           H
ATOM   1073  CZ  TYR X  68     219.202 203.647 295.451  1.00  0.00           C
ATOM   1074  OH  TYR X  68     220.262 203.561 294.568  1.00  0.00           O
ATOM   1075  HH  TYR X  68     220.248 202.721 294.102  1.00  0.00           H
ATOM   1076  CE2 TYR X  68     218.923 202.564 296.319  1.00  0.00           C
ATOM   1077  HE2 TYR X  68     219.480 201.640 296.279  1.00  0.00           H
ATOM   1078  CD2 TYR X  68     217.775 202.583 297.142  1.00  0.00           C
ATOM   1079  HD2 TYR X  68     217.618 201.695 297.736  1.00  0.00           H
ATOM   1080  C   TYR X  68     216.223 205.790 299.515  1.00  0.00           C
ATOM   1081  O   TYR X  68     215.284 206.447 299.097  1.00  0.00           O
ATOM   1082  N   PHE X  69     217.420 206.388 299.709  1.00  0.00           N
ATOM   1083  H   PHE X  69     218.262 205.892 299.965  1.00  0.00           H
ATOM   1084  CA  PHE X  69     217.626 207.841 299.592  1.00  0.00           C
ATOM   1085  HA  PHE X  69     216.892 208.268 298.909  1.00  0.00           H
ATOM   1086  CB  PHE X  69     217.491 208.428 300.959  1.00  0.00           C
ATOM   1087  HB2 PHE X  69     218.187 207.883 301.596  1.00  0.00           H
ATOM   1088  HB3 PHE X  69     217.962 209.405 300.846  1.00  0.00           H
ATOM   1089  CG  PHE X  69     216.110 208.596 301.683  1.00  0.00           C
ATOM   1090  CD1 PHE X  69     215.387 209.832 301.559  1.00  0.00           C
ATOM   1091  HD1 PHE X  69     215.775 210.647 300.967  1.00  0.00           H
ATOM   1092  CE1 PHE X  69     214.189 209.938 302.291  1.00  0.00           C
ATOM   1093  HE1 PHE X  69     213.570 210.816 302.178  1.00  0.00           H
ATOM   1094  CZ  PHE X  69     213.721 208.866 303.104  1.00  0.00           C
ATOM   1095  HZ  PHE X  69     212.829 208.915 303.712  1.00  0.00           H
ATOM   1096  CE2 PHE X  69     214.425 207.645 303.198  1.00  0.00           C
ATOM   1097  HE2 PHE X  69     214.159 206.933 303.965  1.00  0.00           H
ATOM   1098  CD2 PHE X  69     215.672 207.557 302.495  1.00  0.00           C
ATOM   1099  HD2 PHE X  69     216.327 206.708 302.622  1.00  0.00           H
ATOM   1100  C   PHE X  69     218.958 208.176 299.074  1.00  0.00           C
ATOM   1101  O   PHE X  69     219.922 207.482 299.328  1.00  0.00           O
ATOM   1102  N   GLY X  70     218.978 209.149 298.175  1.00  0.00           N
ATOM   1103  H   GLY X  70     218.143 209.653 297.914  1.00  0.00           H
ATOM   1104  CA  GLY X  70     220.013 209.424 297.291  1.00  0.00           C
ATOM   1105  HA2 GLY X  70     219.712 210.229 296.621  1.00  0.00           H
ATOM   1106  HA3 GLY X  70     220.848 209.897 297.809  1.00  0.00           H
ATOM   1107  C   GLY X  70     220.546 208.243 296.434  1.00  0.00           C
ATOM   1108  O   GLY X  70     219.970 207.981 295.365  1.00  0.00           O
ATOM   1109  N   LEU X  71     221.636 207.575 296.811  1.00  0.00           N
ATOM   1110  H   LEU X  71     222.160 207.852 297.629  1.00  0.00           H
ATOM   1111  CA  LEU X  71     222.176 206.432 296.044  1.00  0.00           C
ATOM   1112  HA  LEU X  71     221.414 206.136 295.324  1.00  0.00           H
ATOM   1113  CB  LEU X  71     223.394 206.806 295.182  1.00  0.00           C
ATOM   1114  HB2 LEU X  71     224.178 207.233 295.808  1.00  0.00           H
ATOM   1115  HB3 LEU X  71     223.837 205.906 294.757  1.00  0.00           H
ATOM   1116  CG  LEU X  71     223.073 207.819 294.086  1.00  0.00           C
ATOM   1117  HG  LEU X  71     222.645 208.718 294.530  1.00  0.00           H
ATOM   1118  CD1 LEU X  71     224.395 208.361 293.557  1.00  0.00           C
ATOM   1119 HD11 LEU X  71     224.981 207.661 292.961  1.00  0.00           H
ATOM   1120 HD12 LEU X  71     225.037 208.651 294.388  1.00  0.00           H
ATOM   1121 HD13 LEU X  71     224.206 209.165 292.845  1.00  0.00           H
ATOM   1122  CD2 LEU X  71     222.245 207.134 292.944  1.00  0.00           C
ATOM   1123 HD21 LEU X  71     222.887 206.530 292.303  1.00  0.00           H
ATOM   1124 HD22 LEU X  71     221.478 206.429 293.265  1.00  0.00           H
ATOM   1125 HD23 LEU X  71     221.774 207.940 292.381  1.00  0.00           H
ATOM   1126  C   LEU X  71     222.244 205.098 296.873  1.00  0.00           C
ATOM   1127  O   LEU X  71     223.084 204.223 296.627  1.00  0.00           O
ATOM   1128  N   LYS X  72     221.390 204.899 297.862  1.00  0.00           N
ATOM   1129  H   LYS X  72     220.809 205.692 298.094  1.00  0.00           H
ATOM   1130  CA  LYS X  72     221.546 203.858 298.879  1.00  0.00           C
ATOM   1131  HA  LYS X  72     221.781 202.937 298.346  1.00  0.00           H
ATOM   1132  CB  LYS X  72     222.783 204.176 299.822  1.00  0.00           C
ATOM   1133  HB2 LYS X  72     222.739 203.413 300.599  1.00  0.00           H
ATOM   1134  HB3 LYS X  72     223.655 204.070 299.176  1.00  0.00           H
ATOM   1135  CG  LYS X  72     222.815 205.533 300.518  1.00  0.00           C
ATOM   1136  HG2 LYS X  72     222.612 206.314 299.785  1.00  0.00           H
ATOM   1137  HG3 LYS X  72     222.140 205.400 301.364  1.00  0.00           H
ATOM   1138  CD  LYS X  72     224.267 205.785 300.990  1.00  0.00           C
ATOM   1139  HD2 LYS X  72     224.630 204.965 301.610  1.00  0.00           H
ATOM   1140  HD3 LYS X  72     224.881 205.941 300.103  1.00  0.00           H
ATOM   1141  CE  LYS X  72     224.235 207.036 301.789  1.00  0.00           C
ATOM   1142  HE2 LYS X  72     223.900 207.856 301.153  1.00  0.00           H
ATOM   1143  HE3 LYS X  72     223.482 206.981 302.575  1.00  0.00           H
ATOM   1144  NZ  LYS X  72     225.500 207.497 302.411  1.00  0.00           N
ATOM   1145  HZ1 LYS X  72     225.853 206.656 302.845  1.00  0.00           H
ATOM   1146  HZ2 LYS X  72     225.343 208.277 303.034  1.00  0.00           H
ATOM   1147  HZ3 LYS X  72     226.170 207.838 301.737  1.00  0.00           H
ATOM   1148  C   LYS X  72     220.236 203.517 299.648  1.00  0.00           C
ATOM   1149  O   LYS X  72     219.582 204.492 299.967  1.00  0.00           O
ATOM   1150  N   PRO X  73     220.130 202.263 300.092  1.00  0.00           N
ATOM   1151  CD  PRO X  73     220.951 201.138 299.665  1.00  0.00           C
ATOM   1152  HD2 PRO X  73     222.016 201.281 299.845  1.00  0.00           H
ATOM   1153  HD3 PRO X  73     220.750 200.885 298.624  1.00  0.00           H
ATOM   1154  CG  PRO X  73     220.419 199.966 300.538  1.00  0.00           C
ATOM   1155  HG2 PRO X  73     221.168 199.936 301.329  1.00  0.00           H
ATOM   1156  HG3 PRO X  73     220.679 199.064 299.984  1.00  0.00           H
ATOM   1157  CB  PRO X  73     218.918 200.296 300.920  1.00  0.00           C
ATOM   1158  HB2 PRO X  73     218.646 199.824 301.864  1.00  0.00           H
ATOM   1159  HB3 PRO X  73     218.347 200.000 300.039  1.00  0.00           H
ATOM   1160  CA  PRO X  73     219.077 201.812 300.995  1.00  0.00           C
ATOM   1161  HA  PRO X  73     218.157 202.321 300.707  1.00  0.00           H
ATOM   1162  C   PRO X  73     219.348 202.267 302.472  1.00  0.00           C
ATOM   1163  O   PRO X  73     220.279 201.745 303.061  1.00  0.00           O
ATOM   1164  N   ILE X  74     218.461 203.060 303.079  1.00  0.00           N
ATOM   1165  H   ILE X  74     217.570 203.283 302.658  1.00  0.00           H
ATOM   1166  CA  ILE X  74     218.558 203.314 304.535  1.00  0.00           C
ATOM   1167  HA  ILE X  74     219.574 203.118 304.878  1.00  0.00           H
ATOM   1168  CB  ILE X  74     218.089 204.699 304.818  1.00  0.00           C
ATOM   1169  HB  ILE X  74     217.249 204.919 304.160  1.00  0.00           H
ATOM   1170  CG2 ILE X  74     217.721 204.974 306.300  1.00  0.00           C
ATOM   1171 HG21 ILE X  74     217.662 206.059 306.390  1.00  0.00           H
ATOM   1172 HG22 ILE X  74     218.439 204.669 307.061  1.00  0.00           H
ATOM   1173 HG23 ILE X  74     216.779 204.486 306.550  1.00  0.00           H
ATOM   1174  CG1 ILE X  74     219.126 205.797 304.472  1.00  0.00           C
ATOM   1175 HG12 ILE X  74     218.709 206.785 304.668  1.00  0.00           H
ATOM   1176 HG13 ILE X  74     219.989 205.656 305.123  1.00  0.00           H
ATOM   1177  CD1 ILE X  74     219.476 205.892 302.955  1.00  0.00           C
ATOM   1178 HD11 ILE X  74     218.627 205.711 302.296  1.00  0.00           H
ATOM   1179 HD12 ILE X  74     219.952 206.845 302.725  1.00  0.00           H
ATOM   1180 HD13 ILE X  74     220.221 205.161 302.641  1.00  0.00           H
ATOM   1181  C   ILE X  74     217.575 202.334 305.201  1.00  0.00           C
ATOM   1182  O   ILE X  74     216.454 202.092 304.722  1.00  0.00           O
ATOM   1183  N   VAL X  75     217.970 201.681 306.305  1.00  0.00           N
ATOM   1184  H   VAL X  75     218.833 202.018 306.709  1.00  0.00           H
ATOM   1185  CA  VAL X  75     217.109 200.742 307.059  1.00  0.00           C
ATOM   1186  HA  VAL X  75     216.684 200.057 306.326  1.00  0.00           H
ATOM   1187  CB  VAL X  75     217.990 199.917 307.987  1.00  0.00           C
ATOM   1188  HB  VAL X  75     218.405 200.582 308.745  1.00  0.00           H
ATOM   1189  CG1 VAL X  75     217.218 198.852 308.726  1.00  0.00           C
ATOM   1190 HG11 VAL X  75     216.399 199.242 309.331  1.00  0.00           H
ATOM   1191 HG12 VAL X  75     216.765 198.141 308.035  1.00  0.00           H
ATOM   1192 HG13 VAL X  75     217.948 198.400 309.398  1.00  0.00           H
ATOM   1193  CG2 VAL X  75     219.065 199.176 307.195  1.00  0.00           C
ATOM   1194 HG21 VAL X  75     219.708 199.856 306.636  1.00  0.00           H
ATOM   1195 HG22 VAL X  75     218.595 198.490 306.490  1.00  0.00           H
ATOM   1196 HG23 VAL X  75     219.728 198.705 307.921  1.00  0.00           H
ATOM   1197  C   VAL X  75     215.928 201.484 307.814  1.00  0.00           C
ATOM   1198  O   VAL X  75     216.037 202.595 308.366  1.00  0.00           O
ATOM   1199  N   VAL X  76     214.710 200.841 307.961  1.00  0.00           N
ATOM   1200  H   VAL X  76     214.479 200.026 307.411  1.00  0.00           H
ATOM   1201  CA  VAL X  76     213.747 201.234 308.980  1.00  0.00           C
ATOM   1202  HA  VAL X  76     214.182 201.967 309.659  1.00  0.00           H
ATOM   1203  CB  VAL X  76     212.613 202.060 308.376  1.00  0.00           C
ATOM   1204  HB  VAL X  76     213.089 202.840 307.782  1.00  0.00           H
ATOM   1205  CG1 VAL X  76     211.757 201.208 307.412  1.00  0.00           C
ATOM   1206 HG11 VAL X  76     210.786 201.007 307.864  1.00  0.00           H
ATOM   1207 HG12 VAL X  76     211.652 201.714 306.452  1.00  0.00           H
ATOM   1208 HG13 VAL X  76     212.191 200.230 307.204  1.00  0.00           H
ATOM   1209  CG2 VAL X  76     211.686 202.734 309.351  1.00  0.00           C
ATOM   1210 HG21 VAL X  76     212.296 203.230 310.106  1.00  0.00           H
ATOM   1211 HG22 VAL X  76     210.964 202.056 309.807  1.00  0.00           H
ATOM   1212 HG23 VAL X  76     211.189 203.555 308.834  1.00  0.00           H
ATOM   1213  C   VAL X  76     213.225 200.091 309.916  1.00  0.00           C
ATOM   1214  O   VAL X  76     212.663 199.126 309.460  1.00  0.00           O
ATOM   1215  N   LEU X  77     213.215 200.379 311.210  1.00  0.00           N
ATOM   1216  H   LEU X  77     213.747 201.152 311.584  1.00  0.00           H
ATOM   1217  CA  LEU X  77     212.436 199.570 312.183  1.00  0.00           C
ATOM   1218  HA  LEU X  77     212.425 198.502 311.963  1.00  0.00           H
ATOM   1219  CB  LEU X  77     212.993 199.839 313.551  1.00  0.00           C
ATOM   1220  HB2 LEU X  77     213.229 200.896 313.682  1.00  0.00           H
ATOM   1221  HB3 LEU X  77     212.330 199.609 314.384  1.00  0.00           H
ATOM   1222  CG  LEU X  77     214.251 198.977 313.746  1.00  0.00           C
ATOM   1223  HG  LEU X  77     214.799 198.866 312.810  1.00  0.00           H
ATOM   1224  CD1 LEU X  77     215.196 199.439 314.858  1.00  0.00           C
ATOM   1225 HD11 LEU X  77     216.229 199.190 314.617  1.00  0.00           H
ATOM   1226 HD12 LEU X  77     215.132 200.526 314.820  1.00  0.00           H
ATOM   1227 HD13 LEU X  77     215.048 199.149 315.898  1.00  0.00           H
ATOM   1228  CD2 LEU X  77     213.898 197.558 314.248  1.00  0.00           C
ATOM   1229 HD21 LEU X  77     213.093 197.218 313.596  1.00  0.00           H
ATOM   1230 HD22 LEU X  77     214.818 196.980 314.339  1.00  0.00           H
ATOM   1231 HD23 LEU X  77     213.459 197.613 315.244  1.00  0.00           H
ATOM   1232  C   LEU X  77     210.928 199.957 312.179  1.00  0.00           C
ATOM   1233  O   LEU X  77     210.692 201.071 312.518  1.00  0.00           O
ATOM   1234  N   HIE X  78     210.001 199.058 311.846  1.00  0.00           N
ATOM   1235  H   HIE X  78     210.294 198.124 311.596  1.00  0.00           H
ATOM   1236  CA  HIE X  78     208.578 199.154 312.179  1.00  0.00           C
ATOM   1237  HA  HIE X  78     208.344 200.091 312.683  1.00  0.00           H
ATOM   1238  CB  HIE X  78     207.879 199.192 310.843  1.00  0.00           C
ATOM   1239  HB2 HIE X  78     208.422 199.840 310.156  1.00  0.00           H
ATOM   1240  HB3 HIE X  78     207.798 198.177 310.453  1.00  0.00           H
ATOM   1241  CG  HIE X  78     206.498 199.887 310.854  1.00  0.00           C
ATOM   1242  ND1 HIE X  78     206.212 201.232 310.748  1.00  0.00           N
ATOM   1243  CE1 HIE X  78     204.915 201.337 311.002  1.00  0.00           C
ATOM   1244  HE1 HIE X  78     204.398 202.269 310.826  1.00  0.00           H
ATOM   1245  NE2 HIE X  78     204.423 200.183 311.332  1.00  0.00           N
ATOM   1246  HE2 HIE X  78     203.478 199.948 311.600  1.00  0.00           H
ATOM   1247  CD2 HIE X  78     205.441 199.244 311.275  1.00  0.00           C
ATOM   1248  HD2 HIE X  78     205.298 198.189 311.461  1.00  0.00           H
ATOM   1249  C   HIE X  78     208.049 198.014 313.116  1.00  0.00           C
ATOM   1250  O   HIE X  78     207.103 197.297 312.827  1.00  0.00           O
ATOM   1251  N   GLY X  79     208.680 197.916 314.259  1.00  0.00           N
ATOM   1252  H   GLY X  79     209.590 198.329 314.404  1.00  0.00           H
ATOM   1253  CA  GLY X  79     208.053 197.087 315.370  1.00  0.00           C
ATOM   1254  HA2 GLY X  79     207.264 197.713 315.786  1.00  0.00           H
ATOM   1255  HA3 GLY X  79     207.568 196.237 314.891  1.00  0.00           H
ATOM   1256  C   GLY X  79     208.952 196.616 316.463  1.00  0.00           C
ATOM   1257  O   GLY X  79     210.114 196.381 316.151  1.00  0.00           O
ATOM   1258  N   TYR X  80     208.507 196.522 317.705  1.00  0.00           N
ATOM   1259  H   TYR X  80     207.510 196.655 317.797  1.00  0.00           H
ATOM   1260  CA  TYR X  80     209.232 196.130 318.919  1.00  0.00           C
ATOM   1261  HA  TYR X  80     210.106 196.781 318.921  1.00  0.00           H
ATOM   1262  CB  TYR X  80     208.500 196.395 320.231  1.00  0.00           C
ATOM   1263  HB2 TYR X  80     208.085 197.403 320.224  1.00  0.00           H
ATOM   1264  HB3 TYR X  80     207.713 195.646 320.318  1.00  0.00           H
ATOM   1265  CG  TYR X  80     209.469 196.309 321.406  1.00  0.00           C
ATOM   1266  CD1 TYR X  80     210.340 197.371 321.597  1.00  0.00           C
ATOM   1267  HD1 TYR X  80     210.409 198.238 320.957  1.00  0.00           H
ATOM   1268  CE1 TYR X  80     211.263 197.249 322.647  1.00  0.00           C
ATOM   1269  HE1 TYR X  80     212.087 197.934 322.775  1.00  0.00           H
ATOM   1270  CZ  TYR X  80     211.220 196.152 323.558  1.00  0.00           C
ATOM   1271  OH  TYR X  80     212.230 196.073 324.472  1.00  0.00           O
ATOM   1272  HH  TYR X  80     212.397 195.164 324.729  1.00  0.00           H
ATOM   1273  CE2 TYR X  80     210.267 195.161 323.354  1.00  0.00           C
ATOM   1274  HE2 TYR X  80     210.195 194.313 324.019  1.00  0.00           H
ATOM   1275  CD2 TYR X  80     209.400 195.225 322.268  1.00  0.00           C
ATOM   1276  HD2 TYR X  80     208.562 194.546 322.218  1.00  0.00           H
ATOM   1277  C   TYR X  80     209.838 194.711 318.901  1.00  0.00           C
ATOM   1278  O   TYR X  80     211.008 194.408 319.291  1.00  0.00           O
ATOM   1279  N   GLU X  81     209.229 193.904 318.098  1.00  0.00           N
ATOM   1280  H   GLU X  81     208.338 194.165 317.701  1.00  0.00           H
ATOM   1281  CA  GLU X  81     209.599 192.604 317.682  1.00  0.00           C
ATOM   1282  HA  GLU X  81     209.810 191.996 318.562  1.00  0.00           H
ATOM   1283  CB  GLU X  81     208.445 192.050 316.859  1.00  0.00           C
ATOM   1284  HB2 GLU X  81     208.242 192.647 315.969  1.00  0.00           H
ATOM   1285  HB3 GLU X  81     208.675 191.014 316.611  1.00  0.00           H
ATOM   1286  CG  GLU X  81     207.129 191.813 317.641  1.00  0.00           C
ATOM   1287  HG2 GLU X  81     206.510 191.148 317.038  1.00  0.00           H
ATOM   1288  HG3 GLU X  81     207.407 191.380 318.602  1.00  0.00           H
ATOM   1289  CD  GLU X  81     206.229 193.093 317.793  1.00  0.00           C
ATOM   1290  OE1 GLU X  81     206.497 194.174 317.195  1.00  0.00           O
ATOM   1291  OE2 GLU X  81     205.339 193.062 318.665  1.00  0.00           O
ATOM   1292  C   GLU X  81     210.895 192.525 316.828  1.00  0.00           C
ATOM   1293  O   GLU X  81     211.583 191.501 316.748  1.00  0.00           O
ATOM   1294  N   ALA X  82     211.379 193.642 316.279  1.00  0.00           N
ATOM   1295  H   ALA X  82     210.736 194.421 316.308  1.00  0.00           H
ATOM   1296  CA  ALA X  82     212.792 193.828 315.836  1.00  0.00           C
ATOM   1297  HA  ALA X  82     213.322 192.885 315.962  1.00  0.00           H
ATOM   1298  CB  ALA X  82     212.922 194.204 314.395  1.00  0.00           C
ATOM   1299  HB1 ALA X  82     212.535 193.362 313.820  1.00  0.00           H
ATOM   1300  HB2 ALA X  82     213.910 194.529 314.070  1.00  0.00           H
ATOM   1301  HB3 ALA X  82     212.279 195.048 314.147  1.00  0.00           H
ATOM   1302  C   ALA X  82     213.590 194.820 316.662  1.00  0.00           C
ATOM   1303  O   ALA X  82     214.790 194.618 316.851  1.00  0.00           O
ATOM   1304  N   VAL X  83     212.981 195.837 317.304  1.00  0.00           N
ATOM   1305  H   VAL X  83     211.975 195.880 317.235  1.00  0.00           H
ATOM   1306  CA  VAL X  83     213.624 196.857 318.154  1.00  0.00           C
ATOM   1307  HA  VAL X  83     214.272 197.391 317.459  1.00  0.00           H
ATOM   1308  CB  VAL X  83     212.678 197.863 318.776  1.00  0.00           C
ATOM   1309  HB  VAL X  83     211.958 197.294 319.364  1.00  0.00           H
ATOM   1310  CG1 VAL X  83     213.361 198.789 319.864  1.00  0.00           C
ATOM   1311 HG11 VAL X  83     213.461 198.214 320.784  1.00  0.00           H
ATOM   1312 HG12 VAL X  83     214.316 199.126 319.461  1.00  0.00           H
ATOM   1313 HG13 VAL X  83     212.732 199.659 320.051  1.00  0.00           H
ATOM   1314  CG2 VAL X  83     212.013 198.810 317.744  1.00  0.00           C
ATOM   1315 HG21 VAL X  83     211.263 199.455 318.202  1.00  0.00           H
ATOM   1316 HG22 VAL X  83     211.585 198.215 316.937  1.00  0.00           H
ATOM   1317 HG23 VAL X  83     212.755 199.502 317.348  1.00  0.00           H
ATOM   1318  C   VAL X  83     214.507 196.181 319.224  1.00  0.00           C
ATOM   1319  O   VAL X  83     215.717 196.502 319.262  1.00  0.00           O
ATOM   1320  N   LYS X  84     213.996 195.258 320.003  1.00  0.00           N
ATOM   1321  H   LYS X  84     212.999 195.287 320.162  1.00  0.00           H
ATOM   1322  CA  LYS X  84     214.802 194.426 320.956  1.00  0.00           C
ATOM   1323  HA  LYS X  84     215.234 195.042 321.745  1.00  0.00           H
ATOM   1324  CB  LYS X  84     213.804 193.465 321.596  1.00  0.00           C
ATOM   1325  HB2 LYS X  84     213.096 194.087 322.143  1.00  0.00           H
ATOM   1326  HB3 LYS X  84     213.188 192.984 320.836  1.00  0.00           H
ATOM   1327  CG  LYS X  84     214.387 192.465 322.601  1.00  0.00           C
ATOM   1328  HG2 LYS X  84     213.562 191.854 322.968  1.00  0.00           H
ATOM   1329  HG3 LYS X  84     215.127 191.802 322.154  1.00  0.00           H
ATOM   1330  CD  LYS X  84     215.107 193.150 323.853  1.00  0.00           C
ATOM   1331  HD2 LYS X  84     216.012 193.656 323.517  1.00  0.00           H
ATOM   1332  HD3 LYS X  84     214.401 193.876 324.256  1.00  0.00           H
ATOM   1333  CE  LYS X  84     215.547 192.204 325.003  1.00  0.00           C
ATOM   1334  HE2 LYS X  84     215.887 192.888 325.781  1.00  0.00           H
ATOM   1335  HE3 LYS X  84     214.717 191.617 325.397  1.00  0.00           H
ATOM   1336  NZ  LYS X  84     216.716 191.330 324.540  1.00  0.00           N
ATOM   1337  HZ1 LYS X  84     216.903 190.629 325.242  1.00  0.00           H
ATOM   1338  HZ2 LYS X  84     217.566 191.811 324.284  1.00  0.00           H
ATOM   1339  HZ3 LYS X  84     216.387 190.769 323.768  1.00  0.00           H
ATOM   1340  C   LYS X  84     215.999 193.708 320.301  1.00  0.00           C
ATOM   1341  O   LYS X  84     217.104 193.760 320.763  1.00  0.00           O
ATOM   1342  N   GLU X  85     215.682 193.065 319.167  1.00  0.00           N
ATOM   1343  H   GLU X  85     214.702 193.100 318.927  1.00  0.00           H
ATOM   1344  CA  GLU X  85     216.662 192.202 318.485  1.00  0.00           C
ATOM   1345  HA  GLU X  85     217.312 191.641 319.157  1.00  0.00           H
ATOM   1346  CB  GLU X  85     215.948 191.282 317.492  1.00  0.00           C
ATOM   1347  HB2 GLU X  85     215.220 191.791 316.860  1.00  0.00           H
ATOM   1348  HB3 GLU X  85     216.699 190.757 316.902  1.00  0.00           H
ATOM   1349  CG  GLU X  85     215.215 190.155 318.244  1.00  0.00           C
ATOM   1350  HG2 GLU X  85     214.536 190.527 319.011  1.00  0.00           H
ATOM   1351  HG3 GLU X  85     214.494 189.623 317.624  1.00  0.00           H
ATOM   1352  CD  GLU X  85     216.156 189.164 318.918  1.00  0.00           C
ATOM   1353  OE1 GLU X  85     215.730 188.590 319.959  1.00  0.00           O
ATOM   1354  OE2 GLU X  85     217.297 188.973 318.402  1.00  0.00           O
ATOM   1355  C   GLU X  85     217.743 193.066 317.781  1.00  0.00           C
ATOM   1356  O   GLU X  85     218.850 192.539 317.521  1.00  0.00           O
ATOM   1357  N   ALA X  86     217.453 194.365 317.480  1.00  0.00           N
ATOM   1358  H   ALA X  86     216.498 194.691 317.527  1.00  0.00           H
ATOM   1359  CA  ALA X  86     218.273 195.191 316.652  1.00  0.00           C
ATOM   1360  HA  ALA X  86     219.045 194.535 316.249  1.00  0.00           H
ATOM   1361  CB  ALA X  86     217.424 195.678 315.459  1.00  0.00           C
ATOM   1362  HB1 ALA X  86     218.074 196.309 314.852  1.00  0.00           H
ATOM   1363  HB2 ALA X  86     216.492 196.180 315.718  1.00  0.00           H
ATOM   1364  HB3 ALA X  86     217.023 194.863 314.857  1.00  0.00           H
ATOM   1365  C   ALA X  86     218.923 196.396 317.423  1.00  0.00           C
ATOM   1366  O   ALA X  86     220.141 196.407 317.564  1.00  0.00           O
ATOM   1367  N   LEU X  87     218.119 197.366 317.875  1.00  0.00           N
ATOM   1368  H   LEU X  87     217.127 197.228 317.741  1.00  0.00           H
ATOM   1369  CA  LEU X  87     218.586 198.542 318.570  1.00  0.00           C
ATOM   1370  HA  LEU X  87     219.462 198.823 317.985  1.00  0.00           H
ATOM   1371  CB  LEU X  87     217.450 199.542 318.357  1.00  0.00           C
ATOM   1372  HB2 LEU X  87     217.225 199.595 317.292  1.00  0.00           H
ATOM   1373  HB3 LEU X  87     216.475 199.306 318.784  1.00  0.00           H
ATOM   1374  CG  LEU X  87     217.803 201.011 318.785  1.00  0.00           C
ATOM   1375  HG  LEU X  87     218.142 201.129 319.814  1.00  0.00           H
ATOM   1376  CD1 LEU X  87     218.985 201.631 318.020  1.00  0.00           C
ATOM   1377 HD11 LEU X  87     219.889 201.272 318.513  1.00  0.00           H
ATOM   1378 HD12 LEU X  87     219.009 201.364 316.963  1.00  0.00           H
ATOM   1379 HD13 LEU X  87     218.961 202.657 318.386  1.00  0.00           H
ATOM   1380  CD2 LEU X  87     216.508 201.725 318.579  1.00  0.00           C
ATOM   1381 HD21 LEU X  87     215.818 201.506 319.394  1.00  0.00           H
ATOM   1382 HD22 LEU X  87     216.661 202.804 318.579  1.00  0.00           H
ATOM   1383 HD23 LEU X  87     216.004 201.506 317.638  1.00  0.00           H
ATOM   1384  C   LEU X  87     219.063 198.256 320.029  1.00  0.00           C
ATOM   1385  O   LEU X  87     219.564 199.195 320.627  1.00  0.00           O
ATOM   1386  N   ILE X  88     218.685 197.057 320.620  1.00  0.00           N
ATOM   1387  H   ILE X  88     218.227 196.355 320.057  1.00  0.00           H
ATOM   1388  CA  ILE X  88     218.826 196.831 322.018  1.00  0.00           C
ATOM   1389  HA  ILE X  88     219.189 197.696 322.573  1.00  0.00           H
ATOM   1390  CB  ILE X  88     217.460 196.532 322.734  1.00  0.00           C
ATOM   1391  HB  ILE X  88     217.041 195.703 322.163  1.00  0.00           H
ATOM   1392  CG2 ILE X  88     217.693 196.159 324.196  1.00  0.00           C
ATOM   1393 HG21 ILE X  88     218.572 195.526 324.318  1.00  0.00           H
ATOM   1394 HG22 ILE X  88     216.847 195.583 324.572  1.00  0.00           H
ATOM   1395 HG23 ILE X  88     217.890 197.006 324.852  1.00  0.00           H
ATOM   1396  CG1 ILE X  88     216.543 197.755 322.680  1.00  0.00           C
ATOM   1397 HG12 ILE X  88     217.083 198.629 323.047  1.00  0.00           H
ATOM   1398 HG13 ILE X  88     216.287 197.846 321.624  1.00  0.00           H
ATOM   1399  CD1 ILE X  88     215.257 197.585 323.468  1.00  0.00           C
ATOM   1400 HD11 ILE X  88     214.693 198.505 323.318  1.00  0.00           H
ATOM   1401 HD12 ILE X  88     214.698 196.780 322.990  1.00  0.00           H
ATOM   1402 HD13 ILE X  88     215.356 197.447 324.544  1.00  0.00           H
ATOM   1403  C   ILE X  88     219.926 195.849 322.168  1.00  0.00           C
ATOM   1404  O   ILE X  88     220.957 196.080 322.773  1.00  0.00           O
ATOM   1405  N   ASP X  89     219.899 194.640 321.514  1.00  0.00           N
ATOM   1406  H   ASP X  89     219.158 194.438 320.858  1.00  0.00           H
ATOM   1407  CA  ASP X  89     220.890 193.610 321.633  1.00  0.00           C
ATOM   1408  HA  ASP X  89     221.078 193.448 322.695  1.00  0.00           H
ATOM   1409  CB  ASP X  89     220.346 192.268 321.172  1.00  0.00           C
ATOM   1410  HB2 ASP X  89     219.773 192.486 320.270  1.00  0.00           H
ATOM   1411  HB3 ASP X  89     221.131 191.552 320.929  1.00  0.00           H
ATOM   1412  CG  ASP X  89     219.292 191.614 322.060  1.00  0.00           C
ATOM   1413  OD1 ASP X  89     219.113 192.048 323.212  1.00  0.00           O
ATOM   1414  OD2 ASP X  89     218.823 190.606 321.536  1.00  0.00           O
ATOM   1415  C   ASP X  89     222.198 193.898 320.881  1.00  0.00           C
ATOM   1416  O   ASP X  89     223.311 193.544 321.297  1.00  0.00           O
ATOM   1417  N   LEU X  90     222.084 194.462 319.681  1.00  0.00           N
ATOM   1418  H   LEU X  90     221.157 194.777 319.435  1.00  0.00           H
ATOM   1419  CA  LEU X  90     223.244 194.887 318.857  1.00  0.00           C
ATOM   1420  HA  LEU X  90     224.154 194.438 319.257  1.00  0.00           H
ATOM   1421  CB  LEU X  90     222.932 194.478 317.382  1.00  0.00           C
ATOM   1422  HB2 LEU X  90     222.051 194.996 317.002  1.00  0.00           H
ATOM   1423  HB3 LEU X  90     223.723 194.797 316.703  1.00  0.00           H
ATOM   1424  CG  LEU X  90     222.792 192.979 317.155  1.00  0.00           C
ATOM   1425  HG  LEU X  90     222.157 192.549 317.930  1.00  0.00           H
ATOM   1426  CD1 LEU X  90     222.197 192.751 315.772  1.00  0.00           C
ATOM   1427 HD11 LEU X  90     222.700 193.358 315.019  1.00  0.00           H
ATOM   1428 HD12 LEU X  90     222.271 191.704 315.476  1.00  0.00           H
ATOM   1429 HD13 LEU X  90     221.126 192.949 315.807  1.00  0.00           H
ATOM   1430  CD2 LEU X  90     224.153 192.251 317.171  1.00  0.00           C
ATOM   1431 HD21 LEU X  90     224.954 192.815 316.693  1.00  0.00           H
ATOM   1432 HD22 LEU X  90     224.508 192.106 318.191  1.00  0.00           H
ATOM   1433 HD23 LEU X  90     224.098 191.213 316.844  1.00  0.00           H
ATOM   1434  C   LEU X  90     223.363 196.388 318.951  1.00  0.00           C
ATOM   1435  O   LEU X  90     224.142 197.046 318.213  1.00  0.00           O
ATOM   1436  N   GLY X  91     222.704 197.013 319.974  1.00  0.00           N
ATOM   1437  H   GLY X  91     222.084 196.477 320.564  1.00  0.00           H
ATOM   1438  CA  GLY X  91     222.758 198.541 319.966  1.00  0.00           C
ATOM   1439  HA2 GLY X  91     222.240 198.970 319.108  1.00  0.00           H
ATOM   1440  HA3 GLY X  91     222.244 198.758 320.902  1.00  0.00           H
ATOM   1441  C   GLY X  91     224.102 199.147 320.136  1.00  0.00           C
ATOM   1442  O   GLY X  91     224.158 200.276 319.671  1.00  0.00           O
ATOM   1443  N   GLU X  92     225.115 198.537 320.795  1.00  0.00           N
ATOM   1444  H   GLU X  92     224.879 197.661 321.238  1.00  0.00           H
ATOM   1445  CA  GLU X  92     226.486 199.070 320.691  1.00  0.00           C
ATOM   1446  HA  GLU X  92     226.380 200.146 320.827  1.00  0.00           H
ATOM   1447  CB  GLU X  92     227.427 198.475 321.740  1.00  0.00           C
ATOM   1448  HB2 GLU X  92     227.458 197.446 321.380  1.00  0.00           H
ATOM   1449  HB3 GLU X  92     228.416 198.847 321.470  1.00  0.00           H
ATOM   1450  CG  GLU X  92     227.097 198.624 323.211  1.00  0.00           C
ATOM   1451  HG2 GLU X  92     226.160 198.112 323.431  1.00  0.00           H
ATOM   1452  HG3 GLU X  92     227.917 198.359 323.878  1.00  0.00           H
ATOM   1453  CD  GLU X  92     226.782 200.098 323.388  1.00  0.00           C
ATOM   1454  OE1 GLU X  92     227.611 200.923 322.987  1.00  0.00           O
ATOM   1455  OE2 GLU X  92     225.787 200.437 323.974  1.00  0.00           O
ATOM   1456  C   GLU X  92     227.137 198.977 319.280  1.00  0.00           C
ATOM   1457  O   GLU X  92     227.966 199.798 318.988  1.00  0.00           O
ATOM   1458  N   GLU X  93     226.789 197.990 318.488  1.00  0.00           N
ATOM   1459  H   GLU X  93     226.069 197.320 318.716  1.00  0.00           H
ATOM   1460  CA  GLU X  93     227.121 197.936 317.041  1.00  0.00           C
ATOM   1461  HA  GLU X  93     228.207 198.007 316.984  1.00  0.00           H
ATOM   1462  CB  GLU X  93     226.670 196.532 316.480  1.00  0.00           C
ATOM   1463  HB2 GLU X  93     225.592 196.406 316.580  1.00  0.00           H
ATOM   1464  HB3 GLU X  93     226.927 196.378 315.432  1.00  0.00           H
ATOM   1465  CG  GLU X  93     227.443 195.407 317.276  1.00  0.00           C
ATOM   1466  HG2 GLU X  93     226.874 195.179 318.177  1.00  0.00           H
ATOM   1467  HG3 GLU X  93     227.474 194.469 316.721  1.00  0.00           H
ATOM   1468  CD  GLU X  93     228.853 195.682 317.594  1.00  0.00           C
ATOM   1469  OE1 GLU X  93     229.681 195.818 316.681  1.00  0.00           O
ATOM   1470  OE2 GLU X  93     229.202 195.650 318.756  1.00  0.00           O
ATOM   1471  C   GLU X  93     226.461 199.082 316.217  1.00  0.00           C
ATOM   1472  O   GLU X  93     227.152 199.696 315.353  1.00  0.00           O
ATOM   1473  N   PHE X  94     225.217 199.308 316.466  1.00  0.00           N
ATOM   1474  H   PHE X  94     224.832 198.737 317.204  1.00  0.00           H
ATOM   1475  CA  PHE X  94     224.383 200.444 315.857  1.00  0.00           C
ATOM   1476  HA  PHE X  94     224.621 200.550 314.799  1.00  0.00           H
ATOM   1477  CB  PHE X  94     222.878 200.131 315.867  1.00  0.00           C
ATOM   1478  HB2 PHE X  94     222.604 199.620 316.790  1.00  0.00           H
ATOM   1479  HB3 PHE X  94     222.294 201.029 315.667  1.00  0.00           H
ATOM   1480  CG  PHE X  94     222.516 199.268 314.707  1.00  0.00           C
ATOM   1481  CD1 PHE X  94     222.201 197.903 315.015  1.00  0.00           C
ATOM   1482  HD1 PHE X  94     222.226 197.454 315.996  1.00  0.00           H
ATOM   1483  CE1 PHE X  94     221.705 197.065 313.957  1.00  0.00           C
ATOM   1484  HE1 PHE X  94     221.449 196.044 314.198  1.00  0.00           H
ATOM   1485  CZ  PHE X  94     221.607 197.504 312.585  1.00  0.00           C
ATOM   1486  HZ  PHE X  94     221.306 196.898 311.743  1.00  0.00           H
ATOM   1487  CE2 PHE X  94     221.882 198.881 312.316  1.00  0.00           C
ATOM   1488  HE2 PHE X  94     221.798 199.239 311.300  1.00  0.00           H
ATOM   1489  CD2 PHE X  94     222.265 199.739 313.432  1.00  0.00           C
ATOM   1490  HD2 PHE X  94     222.481 200.761 313.154  1.00  0.00           H
ATOM   1491  C   PHE X  94     224.579 201.808 316.662  1.00  0.00           C
ATOM   1492  O   PHE X  94     223.844 202.755 316.495  1.00  0.00           O
ATOM   1493  N   SER X  95     225.543 201.909 317.554  1.00  0.00           N
ATOM   1494  H   SER X  95     226.084 201.060 317.631  1.00  0.00           H
ATOM   1495  CA  SER X  95     225.898 203.217 318.278  1.00  0.00           C
ATOM   1496  HA  SER X  95     224.886 203.505 318.566  1.00  0.00           H
ATOM   1497  CB  SER X  95     226.798 202.947 319.455  1.00  0.00           C
ATOM   1498  HB2 SER X  95     226.968 203.886 319.982  1.00  0.00           H
ATOM   1499  HB3 SER X  95     226.322 202.260 320.154  1.00  0.00           H
ATOM   1500  OG  SER X  95     228.106 202.553 318.973  1.00  0.00           O
ATOM   1501  HG  SER X  95     228.245 201.609 319.078  1.00  0.00           H
ATOM   1502  C   SER X  95     226.331 204.447 317.537  1.00  0.00           C
ATOM   1503  O   SER X  95     226.906 205.363 318.134  1.00  0.00           O
ATOM   1504  N   GLY X  96     225.993 204.522 316.265  1.00  0.00           N
ATOM   1505  H   GLY X  96     225.279 203.875 315.962  1.00  0.00           H
ATOM   1506  CA  GLY X  96     226.396 205.634 315.358  1.00  0.00           C
ATOM   1507  HA2 GLY X  96     227.180 206.225 315.831  1.00  0.00           H
ATOM   1508  HA3 GLY X  96     226.670 205.180 314.406  1.00  0.00           H
ATOM   1509  C   GLY X  96     225.241 206.602 315.104  1.00  0.00           C
ATOM   1510  O   GLY X  96     224.109 206.387 315.585  1.00  0.00           O
ATOM   1511  N   ARG X  97     225.510 207.610 314.236  1.00  0.00           N
ATOM   1512  H   ARG X  97     226.401 207.552 313.765  1.00  0.00           H
ATOM   1513  CA  ARG X  97     224.481 208.516 313.703  1.00  0.00           C
ATOM   1514  HA  ARG X  97     223.534 207.977 313.681  1.00  0.00           H
ATOM   1515  CB  ARG X  97     224.196 209.739 314.595  1.00  0.00           C
ATOM   1516  HB2 ARG X  97     225.048 210.355 314.885  1.00  0.00           H
ATOM   1517  HB3 ARG X  97     223.604 210.395 313.956  1.00  0.00           H
ATOM   1518  CG  ARG X  97     223.348 209.548 315.892  1.00  0.00           C
ATOM   1519  HG2 ARG X  97     222.625 208.749 315.725  1.00  0.00           H
ATOM   1520  HG3 ARG X  97     224.072 209.317 316.673  1.00  0.00           H
ATOM   1521  CD  ARG X  97     222.572 210.855 316.269  1.00  0.00           C
ATOM   1522  HD2 ARG X  97     223.363 211.584 316.448  1.00  0.00           H
ATOM   1523  HD3 ARG X  97     221.948 211.263 315.473  1.00  0.00           H
ATOM   1524  NE  ARG X  97     221.696 210.693 317.379  1.00  0.00           N
ATOM   1525  HE  ARG X  97     221.965 211.054 318.284  1.00  0.00           H
ATOM   1526  CZ  ARG X  97     220.540 210.078 317.395  1.00  0.00           C
ATOM   1527  NH1 ARG X  97     220.083 209.438 316.368  1.00  0.00           N
ATOM   1528 HH11 ARG X  97     220.574 209.324 315.493  1.00  0.00           H
ATOM   1529 HH12 ARG X  97     219.148 209.057 316.376  1.00  0.00           H
ATOM   1530  NH2 ARG X  97     219.772 210.087 318.462  1.00  0.00           N
ATOM   1531 HH21 ARG X  97     220.012 210.821 319.113  1.00  0.00           H
ATOM   1532 HH22 ARG X  97     218.842 209.695 318.492  1.00  0.00           H
ATOM   1533  C   ARG X  97     224.596 208.804 312.190  1.00  0.00           C
ATOM   1534  O   ARG X  97     225.677 208.564 311.623  1.00  0.00           O
ATOM   1535  N   GLY X  98     223.490 209.333 311.609  1.00  0.00           N
ATOM   1536  H   GLY X  98     222.684 209.285 312.216  1.00  0.00           H
ATOM   1537  CA  GLY X  98     223.424 209.861 310.249  1.00  0.00           C
ATOM   1538  HA2 GLY X  98     223.658 209.056 309.552  1.00  0.00           H
ATOM   1539  HA3 GLY X  98     222.384 210.081 310.009  1.00  0.00           H
ATOM   1540  C   GLY X  98     224.230 211.069 309.993  1.00  0.00           C
ATOM   1541  O   GLY X  98     224.904 211.584 310.823  1.00  0.00           O
ATOM   1542  N   ILE X  99     224.223 211.405 308.709  1.00  0.00           N
ATOM   1543  H   ILE X  99     223.583 210.836 308.174  1.00  0.00           H
ATOM   1544  CA  ILE X  99     225.069 212.443 308.103  1.00  0.00           C
ATOM   1545  HA  ILE X  99     226.089 212.181 308.385  1.00  0.00           H
ATOM   1546  CB  ILE X  99     224.887 212.403 306.562  1.00  0.00           C
ATOM   1547  HB  ILE X  99     225.056 211.369 306.259  1.00  0.00           H
ATOM   1548  CG2 ILE X  99     223.529 212.779 305.999  1.00  0.00           C
ATOM   1549 HG21 ILE X  99     223.397 213.835 306.239  1.00  0.00           H
ATOM   1550 HG22 ILE X  99     222.732 212.127 306.357  1.00  0.00           H
ATOM   1551 HG23 ILE X  99     223.593 212.502 304.947  1.00  0.00           H
ATOM   1552  CG1 ILE X  99     225.954 213.258 305.880  1.00  0.00           C
ATOM   1553 HG12 ILE X  99     225.756 213.336 304.811  1.00  0.00           H
ATOM   1554 HG13 ILE X  99     225.946 214.269 306.288  1.00  0.00           H
ATOM   1555  CD1 ILE X  99     227.435 212.857 306.022  1.00  0.00           C
ATOM   1556 HD11 ILE X  99     227.590 211.916 305.493  1.00  0.00           H
ATOM   1557 HD12 ILE X  99     228.184 213.566 305.670  1.00  0.00           H
ATOM   1558 HD13 ILE X  99     227.579 212.582 307.066  1.00  0.00           H
ATOM   1559  C   ILE X  99     224.794 213.875 308.626  1.00  0.00           C
ATOM   1560  O   ILE X  99     225.676 214.522 309.148  1.00  0.00           O
ATOM   1561  N   PHE X 100     223.520 214.287 308.705  1.00  0.00           N
ATOM   1562  H   PHE X 100     222.840 213.748 308.189  1.00  0.00           H
ATOM   1563  CA  PHE X 100     222.997 215.670 308.983  1.00  0.00           C
ATOM   1564  HA  PHE X 100     221.916 215.670 308.841  1.00  0.00           H
ATOM   1565  CB  PHE X 100     223.200 216.053 310.452  1.00  0.00           C
ATOM   1566  HB2 PHE X 100     224.240 216.164 310.760  1.00  0.00           H
ATOM   1567  HB3 PHE X 100     222.743 217.023 310.651  1.00  0.00           H
ATOM   1568  CG  PHE X 100     222.583 215.058 311.486  1.00  0.00           C
ATOM   1569  CD1 PHE X 100     223.331 214.152 312.295  1.00  0.00           C
ATOM   1570  HD1 PHE X 100     224.406 214.247 312.269  1.00  0.00           H
ATOM   1571  CE1 PHE X 100     222.630 213.308 313.155  1.00  0.00           C
ATOM   1572  HE1 PHE X 100     223.216 212.645 313.775  1.00  0.00           H
ATOM   1573  CZ  PHE X 100     221.202 213.200 313.081  1.00  0.00           C
ATOM   1574  HZ  PHE X 100     220.609 212.601 313.755  1.00  0.00           H
ATOM   1575  CE2 PHE X 100     220.464 214.095 312.258  1.00  0.00           C
ATOM   1576  HE2 PHE X 100     219.384 214.087 312.250  1.00  0.00           H
ATOM   1577  CD2 PHE X 100     221.169 215.040 311.537  1.00  0.00           C
ATOM   1578  HD2 PHE X 100     220.566 215.616 310.851  1.00  0.00           H
ATOM   1579  C   PHE X 100     223.489 216.764 307.989  1.00  0.00           C
ATOM   1580  O   PHE X 100     224.648 216.772 307.536  1.00  0.00           O
ATOM   1581  N   PRO X 101     222.643 217.726 307.599  1.00  0.00           N
ATOM   1582  CD  PRO X 101     221.258 217.773 307.803  1.00  0.00           C
ATOM   1583  HD2 PRO X 101     220.924 217.727 308.840  1.00  0.00           H
ATOM   1584  HD3 PRO X 101     220.844 216.895 307.307  1.00  0.00           H
ATOM   1585  CG  PRO X 101     220.655 219.005 307.142  1.00  0.00           C
ATOM   1586  HG2 PRO X 101     220.603 219.774 307.912  1.00  0.00           H
ATOM   1587  HG3 PRO X 101     219.678 218.812 306.700  1.00  0.00           H
ATOM   1588  CB  PRO X 101     221.659 219.424 306.018  1.00  0.00           C
ATOM   1589  HB2 PRO X 101     221.642 220.497 305.827  1.00  0.00           H
ATOM   1590  HB3 PRO X 101     221.439 218.942 305.065  1.00  0.00           H
ATOM   1591  CA  PRO X 101     222.953 218.843 306.637  1.00  0.00           C
ATOM   1592  HA  PRO X 101     223.371 218.311 305.782  1.00  0.00           H
ATOM   1593  C   PRO X 101     224.016 219.879 306.962  1.00  0.00           C
ATOM   1594  O   PRO X 101     224.136 220.869 306.240  1.00  0.00           O
ATOM   1595  N   LEU X 102     224.737 219.773 308.077  1.00  0.00           N
ATOM   1596  H   LEU X 102     224.528 219.018 308.715  1.00  0.00           H
ATOM   1597  CA  LEU X 102     225.760 220.754 308.419  1.00  0.00           C
ATOM   1598  HA  LEU X 102     225.323 221.741 308.270  1.00  0.00           H
ATOM   1599  CB  LEU X 102     226.101 220.648 309.914  1.00  0.00           C
ATOM   1600  HB2 LEU X 102     226.326 219.603 310.128  1.00  0.00           H
ATOM   1601  HB3 LEU X 102     227.018 221.220 310.060  1.00  0.00           H
ATOM   1602  CG  LEU X 102     224.925 221.182 310.828  1.00  0.00           C
ATOM   1603  HG  LEU X 102     223.991 220.791 310.423  1.00  0.00           H
ATOM   1604  CD1 LEU X 102     225.123 220.611 312.240  1.00  0.00           C
ATOM   1605 HD11 LEU X 102     226.071 221.078 312.505  1.00  0.00           H
ATOM   1606 HD12 LEU X 102     224.240 220.851 312.832  1.00  0.00           H
ATOM   1607 HD13 LEU X 102     225.153 219.522 312.267  1.00  0.00           H
ATOM   1608  CD2 LEU X 102     224.826 222.717 310.884  1.00  0.00           C
ATOM   1609 HD21 LEU X 102     225.781 223.181 311.133  1.00  0.00           H
ATOM   1610 HD22 LEU X 102     224.568 223.079 309.889  1.00  0.00           H
ATOM   1611 HD23 LEU X 102     224.141 222.997 311.684  1.00  0.00           H
ATOM   1612  C   LEU X 102     227.034 220.643 307.575  1.00  0.00           C
ATOM   1613  O   LEU X 102     227.507 219.523 307.362  1.00  0.00           O
ATOM   1614  N   ALA X 103     227.594 221.866 307.226  1.00  0.00           N
ATOM   1615  H   ALA X 103     227.172 222.777 307.332  1.00  0.00           H
ATOM   1616  CA  ALA X 103     228.869 221.853 306.480  1.00  0.00           C
ATOM   1617  HA  ALA X 103     228.764 221.197 305.615  1.00  0.00           H
ATOM   1618  CB  ALA X 103     229.147 223.292 305.901  1.00  0.00           C
ATOM   1619  HB1 ALA X 103     228.335 223.758 305.343  1.00  0.00           H
ATOM   1620  HB2 ALA X 103     230.160 223.477 305.543  1.00  0.00           H
ATOM   1621  HB3 ALA X 103     229.143 223.906 306.802  1.00  0.00           H
ATOM   1622  C   ALA X 103     230.046 221.290 307.224  1.00  0.00           C
ATOM   1623  O   ALA X 103     230.211 221.399 308.450  1.00  0.00           O
ATOM   1624  N   GLU X 104     231.031 220.742 306.505  1.00  0.00           N
ATOM   1625  H   GLU X 104     231.081 220.819 305.500  1.00  0.00           H
ATOM   1626  CA  GLU X 104     232.210 219.985 307.045  1.00  0.00           C
ATOM   1627  HA  GLU X 104     231.799 219.134 307.589  1.00  0.00           H
ATOM   1628  CB  GLU X 104     233.109 219.491 305.882  1.00  0.00           C
ATOM   1629  HB2 GLU X 104     233.398 218.444 305.977  1.00  0.00           H
ATOM   1630  HB3 GLU X 104     232.679 219.629 304.890  1.00  0.00           H
ATOM   1631  CG  GLU X 104     234.479 220.193 305.674  1.00  0.00           C
ATOM   1632  HG2 GLU X 104     235.026 220.376 306.599  1.00  0.00           H
ATOM   1633  HG3 GLU X 104     235.130 219.540 305.094  1.00  0.00           H
ATOM   1634  CD  GLU X 104     234.361 221.454 304.858  1.00  0.00           C
ATOM   1635  OE1 GLU X 104     235.284 221.845 304.065  1.00  0.00           O
ATOM   1636  OE2 GLU X 104     233.284 222.083 304.910  1.00  0.00           O
ATOM   1637  C   GLU X 104     232.998 220.851 308.120  1.00  0.00           C
ATOM   1638  O   GLU X 104     233.659 220.259 308.985  1.00  0.00           O
ATOM   1639  N   ARG X 105     233.061 222.177 307.836  1.00  0.00           N
ATOM   1640  H   ARG X 105     232.685 222.429 306.933  1.00  0.00           H
ATOM   1641  CA  ARG X 105     233.718 223.063 308.759  1.00  0.00           C
ATOM   1642  HA  ARG X 105     234.624 222.565 309.105  1.00  0.00           H
ATOM   1643  CB  ARG X 105     234.096 224.202 307.841  1.00  0.00           C
ATOM   1644  HB2 ARG X 105     234.787 224.859 308.369  1.00  0.00           H
ATOM   1645  HB3 ARG X 105     234.638 223.749 307.010  1.00  0.00           H
ATOM   1646  CG  ARG X 105     232.844 224.979 307.343  1.00  0.00           C
ATOM   1647  HG2 ARG X 105     231.957 224.369 307.169  1.00  0.00           H
ATOM   1648  HG3 ARG X 105     232.670 225.636 308.195  1.00  0.00           H
ATOM   1649  CD  ARG X 105     233.029 225.802 306.049  1.00  0.00           C
ATOM   1650  HD2 ARG X 105     232.165 226.446 305.883  1.00  0.00           H
ATOM   1651  HD3 ARG X 105     233.970 226.326 306.218  1.00  0.00           H
ATOM   1652  NE  ARG X 105     233.147 224.914 304.936  1.00  0.00           N
ATOM   1653  HE  ARG X 105     232.987 223.926 305.077  1.00  0.00           H
ATOM   1654  CZ  ARG X 105     233.666 225.120 303.691  1.00  0.00           C
ATOM   1655  NH1 ARG X 105     233.787 226.284 303.176  1.00  0.00           N
ATOM   1656 HH11 ARG X 105     233.368 227.133 303.529  1.00  0.00           H
ATOM   1657 HH12 ARG X 105     234.271 226.404 302.298  1.00  0.00           H
ATOM   1658  NH2 ARG X 105     234.083 224.064 303.060  1.00  0.00           N
ATOM   1659 HH21 ARG X 105     234.299 223.217 303.567  1.00  0.00           H
ATOM   1660 HH22 ARG X 105     234.357 224.092 302.088  1.00  0.00           H
ATOM   1661  C   ARG X 105     232.935 223.423 310.027  1.00  0.00           C
ATOM   1662  O   ARG X 105     233.432 223.830 311.065  1.00  0.00           O
ATOM   1663  N   ALA X 106     231.617 223.159 310.028  1.00  0.00           N
ATOM   1664  H   ALA X 106     231.227 222.858 309.147  1.00  0.00           H
ATOM   1665  CA  ALA X 106     230.798 223.092 311.247  1.00  0.00           C
ATOM   1666  HA  ALA X 106     231.240 223.708 312.030  1.00  0.00           H
ATOM   1667  CB  ALA X 106     229.428 223.670 310.896  1.00  0.00           C
ATOM   1668  HB1 ALA X 106     229.430 224.760 310.896  1.00  0.00           H
ATOM   1669  HB2 ALA X 106     228.811 223.481 311.774  1.00  0.00           H
ATOM   1670  HB3 ALA X 106     228.993 223.146 310.046  1.00  0.00           H
ATOM   1671  C   ALA X 106     230.756 221.625 311.710  1.00  0.00           C
ATOM   1672  O   ALA X 106     229.666 221.001 311.917  1.00  0.00           O
ATOM   1673  N   ASN X 107     231.904 220.927 311.831  1.00  0.00           N
ATOM   1674  H   ASN X 107     232.746 221.439 311.609  1.00  0.00           H
ATOM   1675  CA  ASN X 107     232.035 219.623 312.446  1.00  0.00           C
ATOM   1676  HA  ASN X 107     231.185 219.033 312.103  1.00  0.00           H
ATOM   1677  CB  ASN X 107     233.307 218.998 312.061  1.00  0.00           C
ATOM   1678  HB2 ASN X 107     233.332 218.717 311.009  1.00  0.00           H
ATOM   1679  HB3 ASN X 107     234.156 219.641 312.296  1.00  0.00           H
ATOM   1680  CG  ASN X 107     233.559 217.703 312.747  1.00  0.00           C
ATOM   1681  OD1 ASN X 107     232.686 217.116 313.433  1.00  0.00           O
ATOM   1682  ND2 ASN X 107     234.702 217.086 312.524  1.00  0.00           N
ATOM   1683 HD21 ASN X 107     234.744 216.184 312.976  1.00  0.00           H
ATOM   1684 HD22 ASN X 107     235.074 217.150 311.587  1.00  0.00           H
ATOM   1685  C   ASN X 107     231.891 219.924 313.967  1.00  0.00           C
ATOM   1686  O   ASN X 107     232.869 220.290 314.580  1.00  0.00           O
ATOM   1687  N   ARG X 108     230.644 219.888 314.489  1.00  0.00           N
ATOM   1688  H   ARG X 108     229.855 219.721 313.881  1.00  0.00           H
ATOM   1689  CA  ARG X 108     230.293 220.123 315.897  1.00  0.00           C
ATOM   1690  HA  ARG X 108     230.960 220.899 316.271  1.00  0.00           H
ATOM   1691  CB  ARG X 108     228.838 220.495 315.898  1.00  0.00           C
ATOM   1692  HB2 ARG X 108     228.210 219.709 315.479  1.00  0.00           H
ATOM   1693  HB3 ARG X 108     228.434 220.658 316.897  1.00  0.00           H
ATOM   1694  CG  ARG X 108     228.524 221.890 315.257  1.00  0.00           C
ATOM   1695  HG2 ARG X 108     229.096 222.675 315.751  1.00  0.00           H
ATOM   1696  HG3 ARG X 108     228.768 221.790 314.200  1.00  0.00           H
ATOM   1697  CD  ARG X 108     227.045 222.264 315.257  1.00  0.00           C
ATOM   1698  HD2 ARG X 108     227.078 223.149 314.621  1.00  0.00           H
ATOM   1699  HD3 ARG X 108     226.356 221.509 314.879  1.00  0.00           H
ATOM   1700  NE  ARG X 108     226.622 222.588 316.629  1.00  0.00           N
ATOM   1701  HE  ARG X 108     227.203 223.224 317.156  1.00  0.00           H
ATOM   1702  CZ  ARG X 108     225.544 222.282 317.350  1.00  0.00           C
ATOM   1703  NH1 ARG X 108     224.416 221.734 316.887  1.00  0.00           N
ATOM   1704 HH11 ARG X 108     224.264 221.568 315.902  1.00  0.00           H
ATOM   1705 HH12 ARG X 108     223.686 221.550 317.560  1.00  0.00           H
ATOM   1706  NH2 ARG X 108     225.649 222.428 318.627  1.00  0.00           N
ATOM   1707 HH21 ARG X 108     226.459 222.949 318.932  1.00  0.00           H
ATOM   1708 HH22 ARG X 108     224.817 222.279 319.180  1.00  0.00           H
ATOM   1709  C   ARG X 108     230.611 218.921 316.813  1.00  0.00           C
ATOM   1710  O   ARG X 108     229.875 218.819 317.799  1.00  0.00           O
ATOM   1711  N   GLY X 109     231.584 218.117 316.514  1.00  0.00           N
ATOM   1712  H   GLY X 109     232.117 218.350 315.688  1.00  0.00           H
ATOM   1713  CA  GLY X 109     231.712 216.687 316.978  1.00  0.00           C
ATOM   1714  HA2 GLY X 109     230.850 216.110 316.642  1.00  0.00           H
ATOM   1715  HA3 GLY X 109     232.625 216.332 316.500  1.00  0.00           H
ATOM   1716  C   GLY X 109     231.939 216.453 318.441  1.00  0.00           C
ATOM   1717  O   GLY X 109     231.667 215.405 318.985  1.00  0.00           O
ATOM   1718  N   PHE X 110     232.341 217.484 319.176  1.00  0.00           N
ATOM   1719  H   PHE X 110     232.677 218.283 318.657  1.00  0.00           H
ATOM   1720  CA  PHE X 110     232.292 217.493 320.607  1.00  0.00           C
ATOM   1721  HA  PHE X 110     232.732 216.523 320.842  1.00  0.00           H
ATOM   1722  CB  PHE X 110     233.105 218.698 321.250  1.00  0.00           C
ATOM   1723  HB2 PHE X 110     232.714 219.652 320.897  1.00  0.00           H
ATOM   1724  HB3 PHE X 110     233.053 218.597 322.334  1.00  0.00           H
ATOM   1725  CG  PHE X 110     234.520 218.596 320.723  1.00  0.00           C
ATOM   1726  CD1 PHE X 110     235.480 218.006 321.511  1.00  0.00           C
ATOM   1727  HD1 PHE X 110     235.139 217.503 322.403  1.00  0.00           H
ATOM   1728  CE1 PHE X 110     236.836 217.977 321.254  1.00  0.00           C
ATOM   1729  HE1 PHE X 110     237.537 217.423 321.861  1.00  0.00           H
ATOM   1730  CZ  PHE X 110     237.264 218.654 320.088  1.00  0.00           C
ATOM   1731  HZ  PHE X 110     238.321 218.715 319.874  1.00  0.00           H
ATOM   1732  CE2 PHE X 110     236.377 219.317 319.205  1.00  0.00           C
ATOM   1733  HE2 PHE X 110     236.751 219.905 318.379  1.00  0.00           H
ATOM   1734  CD2 PHE X 110     234.976 219.297 319.527  1.00  0.00           C
ATOM   1735  HD2 PHE X 110     234.233 219.739 318.880  1.00  0.00           H
ATOM   1736  C   PHE X 110     230.869 217.429 321.291  1.00  0.00           C
ATOM   1737  O   PHE X 110     230.610 217.068 322.472  1.00  0.00           O
ATOM   1738  N   GLY X 111     229.812 217.757 320.477  1.00  0.00           N
ATOM   1739  H   GLY X 111     229.962 217.798 319.479  1.00  0.00           H
ATOM   1740  CA  GLY X 111     228.419 217.947 321.044  1.00  0.00           C
ATOM   1741  HA2 GLY X 111     228.345 218.625 321.894  1.00  0.00           H
ATOM   1742  HA3 GLY X 111     227.837 218.249 320.173  1.00  0.00           H
ATOM   1743  C   GLY X 111     227.857 216.676 321.577  1.00  0.00           C
ATOM   1744  O   GLY X 111     228.259 215.558 321.207  1.00  0.00           O
ATOM   1745  N   ILE X 112     226.700 216.798 322.241  1.00  0.00           N
ATOM   1746  H   ILE X 112     226.291 217.707 322.404  1.00  0.00           H
ATOM   1747  CA  ILE X 112     225.899 215.678 322.684  1.00  0.00           C
ATOM   1748  HA  ILE X 112     226.483 214.924 323.213  1.00  0.00           H
ATOM   1749  CB  ILE X 112     224.805 216.245 323.715  1.00  0.00           C
ATOM   1750  HB  ILE X 112     225.429 216.786 324.427  1.00  0.00           H
ATOM   1751  CG2 ILE X 112     223.646 217.016 323.074  1.00  0.00           C
ATOM   1752 HG21 ILE X 112     224.136 217.788 322.481  1.00  0.00           H
ATOM   1753 HG22 ILE X 112     222.921 217.498 323.730  1.00  0.00           H
ATOM   1754 HG23 ILE X 112     223.122 216.327 322.412  1.00  0.00           H
ATOM   1755  CG1 ILE X 112     224.275 215.040 324.577  1.00  0.00           C
ATOM   1756 HG12 ILE X 112     223.544 214.468 324.006  1.00  0.00           H
ATOM   1757 HG13 ILE X 112     225.032 214.261 324.666  1.00  0.00           H
ATOM   1758  CD1 ILE X 112     223.729 215.624 325.941  1.00  0.00           C
ATOM   1759 HD11 ILE X 112     224.597 215.971 326.500  1.00  0.00           H
ATOM   1760 HD12 ILE X 112     223.044 216.459 325.789  1.00  0.00           H
ATOM   1761 HD13 ILE X 112     223.353 214.788 326.531  1.00  0.00           H
ATOM   1762  C   ILE X 112     225.122 214.853 321.549  1.00  0.00           C
ATOM   1763  O   ILE X 112     224.971 213.647 321.665  1.00  0.00           O
ATOM   1764  N   VAL X 113     224.812 215.495 320.403  1.00  0.00           N
ATOM   1765  H   VAL X 113     225.239 216.410 320.416  1.00  0.00           H
ATOM   1766  CA  VAL X 113     224.276 214.881 319.225  1.00  0.00           C
ATOM   1767  HA  VAL X 113     223.487 214.152 319.409  1.00  0.00           H
ATOM   1768  CB  VAL X 113     223.548 215.847 318.305  1.00  0.00           C
ATOM   1769  HB  VAL X 113     224.314 216.534 317.945  1.00  0.00           H
ATOM   1770  CG1 VAL X 113     223.087 215.253 316.992  1.00  0.00           C
ATOM   1771 HG11 VAL X 113     222.707 215.918 316.216  1.00  0.00           H
ATOM   1772 HG12 VAL X 113     223.883 214.677 316.521  1.00  0.00           H
ATOM   1773 HG13 VAL X 113     222.230 214.630 317.248  1.00  0.00           H
ATOM   1774  CG2 VAL X 113     222.405 216.587 318.970  1.00  0.00           C
ATOM   1775 HG21 VAL X 113     222.603 217.083 319.920  1.00  0.00           H
ATOM   1776 HG22 VAL X 113     221.511 215.977 319.100  1.00  0.00           H
ATOM   1777 HG23 VAL X 113     222.202 217.426 318.305  1.00  0.00           H
ATOM   1778  C   VAL X 113     225.334 214.133 318.459  1.00  0.00           C
ATOM   1779  O   VAL X 113     225.105 213.004 318.070  1.00  0.00           O
ATOM   1780  N   PHE X 114     226.507 214.740 318.217  1.00  0.00           N
ATOM   1781  H   PHE X 114     226.491 215.676 318.596  1.00  0.00           H
ATOM   1782  CA  PHE X 114     227.598 214.292 317.326  1.00  0.00           C
ATOM   1783  HA  PHE X 114     227.161 213.593 316.613  1.00  0.00           H
ATOM   1784  CB  PHE X 114     228.095 215.538 316.567  1.00  0.00           C
ATOM   1785  HB2 PHE X 114     228.874 216.045 317.136  1.00  0.00           H
ATOM   1786  HB3 PHE X 114     228.568 215.109 315.683  1.00  0.00           H
ATOM   1787  CG  PHE X 114     227.114 216.479 315.964  1.00  0.00           C
ATOM   1788  CD1 PHE X 114     226.216 216.061 314.935  1.00  0.00           C
ATOM   1789  HD1 PHE X 114     226.271 215.020 314.653  1.00  0.00           H
ATOM   1790  CE1 PHE X 114     225.189 216.833 314.445  1.00  0.00           C
ATOM   1791  HE1 PHE X 114     224.473 216.480 313.718  1.00  0.00           H
ATOM   1792  CZ  PHE X 114     224.881 218.086 315.096  1.00  0.00           C
ATOM   1793  HZ  PHE X 114     224.007 218.620 314.754  1.00  0.00           H
ATOM   1794  CE2 PHE X 114     225.614 218.455 316.224  1.00  0.00           C
ATOM   1795  HE2 PHE X 114     225.438 219.319 316.847  1.00  0.00           H
ATOM   1796  CD2 PHE X 114     226.722 217.664 316.552  1.00  0.00           C
ATOM   1797  HD2 PHE X 114     227.279 218.044 317.395  1.00  0.00           H
ATOM   1798  C   PHE X 114     228.750 213.542 317.945  1.00  0.00           C
ATOM   1799  O   PHE X 114     229.527 212.944 317.226  1.00  0.00           O
ATOM   1800  N   SER X 115     228.918 213.529 319.262  1.00  0.00           N
ATOM   1801  H   SER X 115     228.421 214.174 319.861  1.00  0.00           H
ATOM   1802  CA  SER X 115     229.997 212.658 319.879  1.00  0.00           C
ATOM   1803  HA  SER X 115     230.950 212.670 319.350  1.00  0.00           H
ATOM   1804  CB  SER X 115     230.352 213.264 321.222  1.00  0.00           C
ATOM   1805  HB2 SER X 115     230.715 214.284 321.098  1.00  0.00           H
ATOM   1806  HB3 SER X 115     229.440 213.284 321.819  1.00  0.00           H
ATOM   1807  OG  SER X 115     231.422 212.638 321.897  1.00  0.00           O
ATOM   1808  HG  SER X 115     231.616 213.167 322.675  1.00  0.00           H
ATOM   1809  C   SER X 115     229.657 211.117 319.890  1.00  0.00           C
ATOM   1810  O   SER X 115     228.625 210.703 319.503  1.00  0.00           O
ATOM   1811  N   ASN X 116     230.605 210.277 320.267  1.00  0.00           N
ATOM   1812  H   ASN X 116     231.549 210.584 320.452  1.00  0.00           H
ATOM   1813  CA  ASN X 116     230.508 208.812 320.254  1.00  0.00           C
ATOM   1814  HA  ASN X 116     229.448 208.559 320.260  1.00  0.00           H
ATOM   1815  CB  ASN X 116     231.217 208.186 318.975  1.00  0.00           C
ATOM   1816  HB2 ASN X 116     232.142 208.753 318.871  1.00  0.00           H
ATOM   1817  HB3 ASN X 116     231.461 207.145 319.186  1.00  0.00           H
ATOM   1818  CG  ASN X 116     230.365 208.209 317.744  1.00  0.00           C
ATOM   1819  OD1 ASN X 116     229.198 208.032 317.716  1.00  0.00           O
ATOM   1820  ND2 ASN X 116     230.971 208.596 316.703  1.00  0.00           N
ATOM   1821 HD21 ASN X 116     230.496 208.502 315.816  1.00  0.00           H
ATOM   1822 HD22 ASN X 116     231.916 208.945 316.769  1.00  0.00           H
ATOM   1823  C   ASN X 116     231.143 208.230 321.564  1.00  0.00           C
ATOM   1824  O   ASN X 116     232.013 208.876 322.195  1.00  0.00           O
ATOM   1825  N   GLY X 117     230.864 206.888 321.806  1.00  0.00           N
ATOM   1826  H   GLY X 117     230.252 206.471 321.119  1.00  0.00           H
ATOM   1827  CA  GLY X 117     231.441 206.059 322.838  1.00  0.00           C
ATOM   1828  HA2 GLY X 117     230.999 205.086 322.623  1.00  0.00           H
ATOM   1829  HA3 GLY X 117     232.475 205.764 322.659  1.00  0.00           H
ATOM   1830  C   GLY X 117     231.243 206.419 324.309  1.00  0.00           C
ATOM   1831  O   GLY X 117     230.531 207.408 324.652  1.00  0.00           O
ATOM   1832  N   LYS X 118     232.077 205.852 325.152  1.00  0.00           N
ATOM   1833  H   LYS X 118     232.749 205.193 324.785  1.00  0.00           H
ATOM   1834  CA  LYS X 118     231.971 205.962 326.576  1.00  0.00           C
ATOM   1835  HA  LYS X 118     231.015 205.635 326.988  1.00  0.00           H
ATOM   1836  CB  LYS X 118     233.024 205.161 327.302  1.00  0.00           C
ATOM   1837  HB2 LYS X 118     232.803 204.097 327.219  1.00  0.00           H
ATOM   1838  HB3 LYS X 118     233.910 205.352 326.696  1.00  0.00           H
ATOM   1839  CG  LYS X 118     233.410 205.531 328.765  1.00  0.00           C
ATOM   1840  HG2 LYS X 118     233.876 206.516 328.787  1.00  0.00           H
ATOM   1841  HG3 LYS X 118     232.504 205.622 329.364  1.00  0.00           H
ATOM   1842  CD  LYS X 118     234.388 204.535 329.421  1.00  0.00           C
ATOM   1843  HD2 LYS X 118     233.900 203.560 329.396  1.00  0.00           H
ATOM   1844  HD3 LYS X 118     235.353 204.409 328.930  1.00  0.00           H
ATOM   1845  CE  LYS X 118     234.565 204.890 330.899  1.00  0.00           C
ATOM   1846  HE2 LYS X 118     233.584 205.153 331.294  1.00  0.00           H
ATOM   1847  HE3 LYS X 118     234.921 204.038 331.478  1.00  0.00           H
ATOM   1848  NZ  LYS X 118     235.534 206.080 331.073  1.00  0.00           N
ATOM   1849  HZ1 LYS X 118     235.179 206.924 330.646  1.00  0.00           H
ATOM   1850  HZ2 LYS X 118     236.397 205.962 330.561  1.00  0.00           H
ATOM   1851  HZ3 LYS X 118     235.688 206.328 332.040  1.00  0.00           H
ATOM   1852  C   LYS X 118     232.069 207.459 327.034  1.00  0.00           C
ATOM   1853  O   LYS X 118     231.389 207.863 327.980  1.00  0.00           O
ATOM   1854  N   LYS X 119     232.827 208.340 326.421  1.00  0.00           N
ATOM   1855  H   LYS X 119     233.566 207.978 325.835  1.00  0.00           H
ATOM   1856  CA  LYS X 119     232.830 209.782 326.683  1.00  0.00           C
ATOM   1857  HA  LYS X 119     233.128 209.894 327.725  1.00  0.00           H
ATOM   1858  CB  LYS X 119     234.054 210.482 325.957  1.00  0.00           C
ATOM   1859  HB2 LYS X 119     234.040 211.486 326.382  1.00  0.00           H
ATOM   1860  HB3 LYS X 119     234.890 209.845 326.246  1.00  0.00           H
ATOM   1861  CG  LYS X 119     233.948 210.622 324.426  1.00  0.00           C
ATOM   1862  HG2 LYS X 119     233.756 209.610 324.072  1.00  0.00           H
ATOM   1863  HG3 LYS X 119     233.117 211.228 324.067  1.00  0.00           H
ATOM   1864  CD  LYS X 119     235.154 211.143 323.658  1.00  0.00           C
ATOM   1865  HD2 LYS X 119     235.422 212.101 324.104  1.00  0.00           H
ATOM   1866  HD3 LYS X 119     236.035 210.563 323.933  1.00  0.00           H
ATOM   1867  CE  LYS X 119     234.957 211.194 322.129  1.00  0.00           C
ATOM   1868  HE2 LYS X 119     234.242 211.993 321.932  1.00  0.00           H
ATOM   1869  HE3 LYS X 119     235.863 211.563 321.650  1.00  0.00           H
ATOM   1870  NZ  LYS X 119     234.583 209.808 321.485  1.00  0.00           N
ATOM   1871  HZ1 LYS X 119     234.192 209.975 320.569  1.00  0.00           H
ATOM   1872  HZ2 LYS X 119     233.818 209.317 321.927  1.00  0.00           H
ATOM   1873  HZ3 LYS X 119     235.375 209.239 321.222  1.00  0.00           H
ATOM   1874  C   LYS X 119     231.454 210.448 326.453  1.00  0.00           C
ATOM   1875  O   LYS X 119     230.920 211.106 327.299  1.00  0.00           O
ATOM   1876  N   TRP X 120     230.829 210.128 325.313  1.00  0.00           N
ATOM   1877  H   TRP X 120     231.318 209.573 324.626  1.00  0.00           H
ATOM   1878  CA  TRP X 120     229.473 210.619 325.007  1.00  0.00           C
ATOM   1879  HA  TRP X 120     229.491 211.707 325.079  1.00  0.00           H
ATOM   1880  CB  TRP X 120     229.163 210.306 323.503  1.00  0.00           C
ATOM   1881  HB2 TRP X 120     229.710 211.035 322.904  1.00  0.00           H
ATOM   1882  HB3 TRP X 120     229.554 209.308 323.305  1.00  0.00           H
ATOM   1883  CG  TRP X 120     227.735 210.368 323.130  1.00  0.00           C
ATOM   1884  CD1 TRP X 120     226.919 211.407 322.839  1.00  0.00           C
ATOM   1885  HD1 TRP X 120     227.277 212.426 322.840  1.00  0.00           H
ATOM   1886  NE1 TRP X 120     225.638 210.950 322.649  1.00  0.00           N
ATOM   1887  HE1 TRP X 120     224.915 211.611 322.401  1.00  0.00           H
ATOM   1888  CE2 TRP X 120     225.533 209.588 322.880  1.00  0.00           C
ATOM   1889  CZ2 TRP X 120     224.507 208.704 322.924  1.00  0.00           C
ATOM   1890  HZ2 TRP X 120     223.509 209.083 322.759  1.00  0.00           H
ATOM   1891  CH2 TRP X 120     224.716 207.300 323.050  1.00  0.00           C
ATOM   1892  HH2 TRP X 120     223.918 206.577 322.967  1.00  0.00           H
ATOM   1893  CZ3 TRP X 120     226.065 206.921 323.365  1.00  0.00           C
ATOM   1894  HZ3 TRP X 120     226.288 205.866 323.419  1.00  0.00           H
ATOM   1895  CE3 TRP X 120     227.155 207.840 323.365  1.00  0.00           C
ATOM   1896  HE3 TRP X 120     228.181 207.512 323.445  1.00  0.00           H
ATOM   1897  CD2 TRP X 120     226.838 209.195 323.173  1.00  0.00           C
ATOM   1898  C   TRP X 120     228.426 210.062 326.038  1.00  0.00           C
ATOM   1899  O   TRP X 120     227.609 210.862 326.486  1.00  0.00           O
ATOM   1900  N   LYS X 121     228.645 208.848 326.446  1.00  0.00           N
ATOM   1901  H   LYS X 121     229.311 208.267 325.958  1.00  0.00           H
ATOM   1902  CA  LYS X 121     227.888 208.300 327.633  1.00  0.00           C
ATOM   1903  HA  LYS X 121     226.854 208.451 327.322  1.00  0.00           H
ATOM   1904  CB  LYS X 121     228.213 206.712 327.789  1.00  0.00           C
ATOM   1905  HB2 LYS X 121     229.270 206.459 327.700  1.00  0.00           H
ATOM   1906  HB3 LYS X 121     227.845 206.280 328.719  1.00  0.00           H
ATOM   1907  CG  LYS X 121     227.547 205.991 326.542  1.00  0.00           C
ATOM   1908  HG2 LYS X 121     226.465 206.028 326.674  1.00  0.00           H
ATOM   1909  HG3 LYS X 121     227.846 206.465 325.607  1.00  0.00           H
ATOM   1910  CD  LYS X 121     228.070 204.559 326.589  1.00  0.00           C
ATOM   1911  HD2 LYS X 121     229.140 204.489 326.395  1.00  0.00           H
ATOM   1912  HD3 LYS X 121     227.823 204.141 327.565  1.00  0.00           H
ATOM   1913  CE  LYS X 121     227.353 203.594 325.546  1.00  0.00           C
ATOM   1914  HE2 LYS X 121     226.390 204.076 325.378  1.00  0.00           H
ATOM   1915  HE3 LYS X 121     227.900 203.742 324.615  1.00  0.00           H
ATOM   1916  NZ  LYS X 121     227.415 202.184 326.018  1.00  0.00           N
ATOM   1917  HZ1 LYS X 121     227.040 202.058 326.947  1.00  0.00           H
ATOM   1918  HZ2 LYS X 121     228.343 201.814 325.870  1.00  0.00           H
ATOM   1919  HZ3 LYS X 121     226.938 201.576 325.369  1.00  0.00           H
ATOM   1920  C   LYS X 121     228.137 209.096 328.912  1.00  0.00           C
ATOM   1921  O   LYS X 121     227.185 209.325 329.685  1.00  0.00           O
ATOM   1922  N   GLU X 122     229.338 209.618 329.180  1.00  0.00           N
ATOM   1923  H   GLU X 122     230.135 209.341 328.626  1.00  0.00           H
ATOM   1924  CA  GLU X 122     229.666 210.548 330.268  1.00  0.00           C
ATOM   1925  HA  GLU X 122     229.423 209.882 331.095  1.00  0.00           H
ATOM   1926  CB  GLU X 122     231.181 210.862 330.261  1.00  0.00           C
ATOM   1927  HB2 GLU X 122     231.714 210.147 329.634  1.00  0.00           H
ATOM   1928  HB3 GLU X 122     231.367 211.800 329.738  1.00  0.00           H
ATOM   1929  CG  GLU X 122     231.756 210.754 331.639  1.00  0.00           C
ATOM   1930  HG2 GLU X 122     232.834 210.860 331.517  1.00  0.00           H
ATOM   1931  HG3 GLU X 122     231.401 211.633 332.178  1.00  0.00           H
ATOM   1932  CD  GLU X 122     231.541 209.537 332.535  1.00  0.00           C
ATOM   1933  OE1 GLU X 122     231.811 208.406 332.066  1.00  0.00           O
ATOM   1934  OE2 GLU X 122     230.948 209.617 333.665  1.00  0.00           O
ATOM   1935  C   GLU X 122     228.743 211.780 330.281  1.00  0.00           C
ATOM   1936  O   GLU X 122     228.096 211.979 331.280  1.00  0.00           O
ATOM   1937  N   ILE X 123     228.763 212.599 329.250  1.00  0.00           N
ATOM   1938  H   ILE X 123     229.272 212.309 328.427  1.00  0.00           H
ATOM   1939  CA  ILE X 123     228.095 213.885 329.168  1.00  0.00           C
ATOM   1940  HA  ILE X 123     228.219 214.416 330.112  1.00  0.00           H
ATOM   1941  CB  ILE X 123     228.633 214.757 328.088  1.00  0.00           C
ATOM   1942  HB  ILE X 123     228.314 215.789 328.240  1.00  0.00           H
ATOM   1943  CG2 ILE X 123     230.186 215.024 328.224  1.00  0.00           C
ATOM   1944 HG21 ILE X 123     230.583 215.904 327.718  1.00  0.00           H
ATOM   1945 HG22 ILE X 123     230.722 214.181 327.787  1.00  0.00           H
ATOM   1946 HG23 ILE X 123     230.451 215.107 329.278  1.00  0.00           H
ATOM   1947  CG1 ILE X 123     228.141 214.276 326.657  1.00  0.00           C
ATOM   1948 HG12 ILE X 123     228.477 213.268 326.415  1.00  0.00           H
ATOM   1949 HG13 ILE X 123     227.060 214.422 326.671  1.00  0.00           H
ATOM   1950  CD1 ILE X 123     228.745 215.134 325.510  1.00  0.00           C
ATOM   1951 HD11 ILE X 123     228.552 216.206 325.559  1.00  0.00           H
ATOM   1952 HD12 ILE X 123     229.829 215.027 325.545  1.00  0.00           H
ATOM   1953 HD13 ILE X 123     228.351 214.929 324.515  1.00  0.00           H
ATOM   1954  C   ILE X 123     226.562 213.653 329.095  1.00  0.00           C
ATOM   1955  O   ILE X 123     225.801 214.520 329.570  1.00  0.00           O
ATOM   1956  N   ARG X 124     226.094 212.536 328.553  1.00  0.00           N
ATOM   1957  H   ARG X 124     226.707 212.018 327.940  1.00  0.00           H
ATOM   1958  CA  ARG X 124     224.742 212.080 328.447  1.00  0.00           C
ATOM   1959  HA  ARG X 124     224.270 212.937 327.965  1.00  0.00           H
ATOM   1960  CB  ARG X 124     224.639 210.789 327.623  1.00  0.00           C
ATOM   1961  HB2 ARG X 124     225.067 210.815 326.621  1.00  0.00           H
ATOM   1962  HB3 ARG X 124     225.071 209.975 328.206  1.00  0.00           H
ATOM   1963  CG  ARG X 124     223.066 210.574 327.297  1.00  0.00           C
ATOM   1964  HG2 ARG X 124     222.412 210.502 328.166  1.00  0.00           H
ATOM   1965  HG3 ARG X 124     222.805 211.492 326.771  1.00  0.00           H
ATOM   1966  CD  ARG X 124     222.691 209.455 326.283  1.00  0.00           C
ATOM   1967  HD2 ARG X 124     223.179 209.644 325.327  1.00  0.00           H
ATOM   1968  HD3 ARG X 124     223.058 208.517 326.698  1.00  0.00           H
ATOM   1969  NE  ARG X 124     221.318 209.502 326.100  1.00  0.00           N
ATOM   1970  HE  ARG X 124     221.002 210.149 325.392  1.00  0.00           H
ATOM   1971  CZ  ARG X 124     220.343 208.840 326.709  1.00  0.00           C
ATOM   1972  NH1 ARG X 124     220.631 207.990 327.681  1.00  0.00           N
ATOM   1973 HH11 ARG X 124     221.548 207.977 328.106  1.00  0.00           H
ATOM   1974 HH12 ARG X 124     219.859 207.538 328.149  1.00  0.00           H
ATOM   1975  NH2 ARG X 124     219.102 208.965 326.422  1.00  0.00           N
ATOM   1976 HH21 ARG X 124     218.905 209.610 325.670  1.00  0.00           H
ATOM   1977 HH22 ARG X 124     218.379 208.619 327.037  1.00  0.00           H
ATOM   1978  C   ARG X 124     224.175 211.949 329.818  1.00  0.00           C
ATOM   1979  O   ARG X 124     223.217 212.604 330.212  1.00  0.00           O
ATOM   1980  N   ARG X 125     224.779 211.069 330.550  1.00  0.00           N
ATOM   1981  H   ARG X 125     225.492 210.482 330.142  1.00  0.00           H
ATOM   1982  CA  ARG X 125     224.370 210.796 331.936  1.00  0.00           C
ATOM   1983  HA  ARG X 125     223.382 210.337 331.972  1.00  0.00           H
ATOM   1984  CB  ARG X 125     225.274 209.668 332.512  1.00  0.00           C
ATOM   1985  HB2 ARG X 125     224.981 208.797 331.926  1.00  0.00           H
ATOM   1986  HB3 ARG X 125     226.324 209.945 332.413  1.00  0.00           H
ATOM   1987  CG  ARG X 125     225.029 209.399 334.026  1.00  0.00           C
ATOM   1988  HG2 ARG X 125     225.449 210.182 334.658  1.00  0.00           H
ATOM   1989  HG3 ARG X 125     223.957 209.362 334.222  1.00  0.00           H
ATOM   1990  CD  ARG X 125     225.741 208.156 334.572  1.00  0.00           C
ATOM   1991  HD2 ARG X 125     225.495 208.135 335.633  1.00  0.00           H
ATOM   1992  HD3 ARG X 125     225.356 207.291 334.031  1.00  0.00           H
ATOM   1993  NE  ARG X 125     227.171 208.218 334.380  1.00  0.00           N
ATOM   1994  HE  ARG X 125     227.676 209.088 334.479  1.00  0.00           H
ATOM   1995  CZ  ARG X 125     228.063 207.236 334.394  1.00  0.00           C
ATOM   1996  NH1 ARG X 125     227.759 205.951 334.579  1.00  0.00           N
ATOM   1997 HH11 ARG X 125     226.821 205.701 334.857  1.00  0.00           H
ATOM   1998 HH12 ARG X 125     228.472 205.236 334.546  1.00  0.00           H
ATOM   1999  NH2 ARG X 125     229.371 207.334 334.218  1.00  0.00           N
ATOM   2000 HH21 ARG X 125     229.799 208.213 333.964  1.00  0.00           H
ATOM   2001 HH22 ARG X 125     229.965 206.549 334.445  1.00  0.00           H
ATOM   2002  C   ARG X 125     224.466 211.986 332.867  1.00  0.00           C
ATOM   2003  O   ARG X 125     223.419 212.227 333.512  1.00  0.00           O
ATOM   2004  N   PHE X 126     225.463 212.877 332.783  1.00  0.00           N
ATOM   2005  H   PHE X 126     226.262 212.768 332.175  1.00  0.00           H
ATOM   2006  CA  PHE X 126     225.412 214.214 333.417  1.00  0.00           C
ATOM   2007  HA  PHE X 126     225.256 214.172 334.495  1.00  0.00           H
ATOM   2008  CB  PHE X 126     226.711 214.987 333.209  1.00  0.00           C
ATOM   2009  HB2 PHE X 126     227.338 214.547 333.984  1.00  0.00           H
ATOM   2010  HB3 PHE X 126     227.117 214.790 332.217  1.00  0.00           H
ATOM   2011  CG  PHE X 126     226.643 216.488 333.527  1.00  0.00           C
ATOM   2012  CD1 PHE X 126     226.338 217.284 332.448  1.00  0.00           C
ATOM   2013  HD1 PHE X 126     226.274 216.912 331.436  1.00  0.00           H
ATOM   2014  CE1 PHE X 126     226.310 218.640 332.638  1.00  0.00           C
ATOM   2015  HE1 PHE X 126     225.986 219.292 331.840  1.00  0.00           H
ATOM   2016  CZ  PHE X 126     226.345 219.211 333.898  1.00  0.00           C
ATOM   2017  HZ  PHE X 126     226.028 220.237 334.016  1.00  0.00           H
ATOM   2018  CE2 PHE X 126     226.659 218.355 335.039  1.00  0.00           C
ATOM   2019  HE2 PHE X 126     226.676 218.808 336.019  1.00  0.00           H
ATOM   2020  CD2 PHE X 126     226.681 217.017 334.858  1.00  0.00           C
ATOM   2021  HD2 PHE X 126     226.911 216.502 335.780  1.00  0.00           H
ATOM   2022  C   PHE X 126     224.284 215.102 332.909  1.00  0.00           C
ATOM   2023  O   PHE X 126     223.582 215.752 333.686  1.00  0.00           O
ATOM   2024  N   SER X 127     223.987 215.095 331.591  1.00  0.00           N
ATOM   2025  H   SER X 127     224.579 214.486 331.045  1.00  0.00           H
ATOM   2026  CA  SER X 127     222.902 215.864 330.938  1.00  0.00           C
ATOM   2027  HA  SER X 127     223.079 216.930 331.077  1.00  0.00           H
ATOM   2028  CB  SER X 127     222.995 215.710 329.427  1.00  0.00           C
ATOM   2029  HB2 SER X 127     222.951 214.644 329.204  1.00  0.00           H
ATOM   2030  HB3 SER X 127     222.211 216.179 328.833  1.00  0.00           H
ATOM   2031  OG  SER X 127     224.199 216.407 329.227  1.00  0.00           O
ATOM   2032  HG  SER X 127     224.888 215.758 329.386  1.00  0.00           H
ATOM   2033  C   SER X 127     221.544 215.498 331.508  1.00  0.00           C
ATOM   2034  O   SER X 127     220.807 216.355 331.994  1.00  0.00           O
ATOM   2035  N   LEU X 128     221.251 214.143 331.559  1.00  0.00           N
ATOM   2036  H   LEU X 128     221.830 213.447 331.113  1.00  0.00           H
ATOM   2037  CA  LEU X 128     220.125 213.607 332.321  1.00  0.00           C
ATOM   2038  HA  LEU X 128     219.217 214.002 331.865  1.00  0.00           H
ATOM   2039  CB  LEU X 128     220.226 212.059 332.182  1.00  0.00           C
ATOM   2040  HB2 LEU X 128     221.237 211.742 332.436  1.00  0.00           H
ATOM   2041  HB3 LEU X 128     219.550 211.661 332.938  1.00  0.00           H
ATOM   2042  CG  LEU X 128     219.979 211.563 330.711  1.00  0.00           C
ATOM   2043  HG  LEU X 128     220.711 212.077 330.089  1.00  0.00           H
ATOM   2044  CD1 LEU X 128     220.196 210.055 330.540  1.00  0.00           C
ATOM   2045 HD11 LEU X 128     220.312 209.896 329.468  1.00  0.00           H
ATOM   2046 HD12 LEU X 128     221.113 209.878 331.101  1.00  0.00           H
ATOM   2047 HD13 LEU X 128     219.373 209.459 330.935  1.00  0.00           H
ATOM   2048  CD2 LEU X 128     218.540 211.731 330.261  1.00  0.00           C
ATOM   2049 HD21 LEU X 128     217.873 211.382 331.049  1.00  0.00           H
ATOM   2050 HD22 LEU X 128     218.324 212.783 330.072  1.00  0.00           H
ATOM   2051 HD23 LEU X 128     218.278 211.084 329.425  1.00  0.00           H
ATOM   2052  C   LEU X 128     220.046 214.146 333.780  1.00  0.00           C
ATOM   2053  O   LEU X 128     219.153 214.854 334.124  1.00  0.00           O
ATOM   2054  N   MET X 129     221.106 213.820 334.553  1.00  0.00           N
ATOM   2055  H   MET X 129     221.642 213.051 334.177  1.00  0.00           H
ATOM   2056  CA  MET X 129     221.134 214.059 336.011  1.00  0.00           C
ATOM   2057  HA  MET X 129     220.259 213.513 336.364  1.00  0.00           H
ATOM   2058  CB  MET X 129     222.402 213.382 336.707  1.00  0.00           C
ATOM   2059  HB2 MET X 129     223.263 213.678 336.108  1.00  0.00           H
ATOM   2060  HB3 MET X 129     222.598 213.783 337.702  1.00  0.00           H
ATOM   2061  CG  MET X 129     222.348 211.830 336.540  1.00  0.00           C
ATOM   2062  HG2 MET X 129     222.155 211.505 335.518  1.00  0.00           H
ATOM   2063  HG3 MET X 129     223.316 211.501 336.918  1.00  0.00           H
ATOM   2064  SD  MET X 129     221.083 210.936 337.496  1.00  0.00           S
ATOM   2065  CE  MET X 129     221.613 209.209 337.410  1.00  0.00           C
ATOM   2066  HE1 MET X 129     222.591 209.065 337.869  1.00  0.00           H
ATOM   2067  HE2 MET X 129     220.836 208.657 337.938  1.00  0.00           H
ATOM   2068  HE3 MET X 129     221.536 208.991 336.345  1.00  0.00           H
ATOM   2069  C   MET X 129     221.068 215.534 336.365  1.00  0.00           C
ATOM   2070  O   MET X 129     220.424 215.937 337.346  1.00  0.00           O
ATOM   2071  N   THR X 130     221.617 216.450 335.606  1.00  0.00           N
ATOM   2072  H   THR X 130     222.092 216.174 334.758  1.00  0.00           H
ATOM   2073  CA  THR X 130     221.294 217.848 335.810  1.00  0.00           C
ATOM   2074  HA  THR X 130     221.531 218.197 336.815  1.00  0.00           H
ATOM   2075  CB  THR X 130     222.179 218.632 334.863  1.00  0.00           C
ATOM   2076  HB  THR X 130     221.883 218.418 333.836  1.00  0.00           H
ATOM   2077  CG2 THR X 130     222.038 220.106 335.044  1.00  0.00           C
ATOM   2078 HG21 THR X 130     222.127 220.443 336.077  1.00  0.00           H
ATOM   2079 HG22 THR X 130     221.039 220.368 334.694  1.00  0.00           H
ATOM   2080 HG23 THR X 130     222.741 220.659 334.421  1.00  0.00           H
ATOM   2081  OG1 THR X 130     223.511 218.318 335.188  1.00  0.00           O
ATOM   2082  HG1 THR X 130     223.702 217.479 334.761  1.00  0.00           H
ATOM   2083  C   THR X 130     219.794 218.051 335.629  1.00  0.00           C
ATOM   2084  O   THR X 130     219.213 218.751 336.468  1.00  0.00           O
ATOM   2085  N   LEU X 131     219.174 217.544 334.599  1.00  0.00           N
ATOM   2086  H   LEU X 131     219.704 217.014 333.923  1.00  0.00           H
ATOM   2087  CA  LEU X 131     217.705 217.667 334.247  1.00  0.00           C
ATOM   2088  HA  LEU X 131     217.408 218.689 334.484  1.00  0.00           H
ATOM   2089  CB  LEU X 131     217.478 217.416 332.690  1.00  0.00           C
ATOM   2090  HB2 LEU X 131     217.803 216.453 332.296  1.00  0.00           H
ATOM   2091  HB3 LEU X 131     216.393 217.460 332.597  1.00  0.00           H
ATOM   2092  CG  LEU X 131     218.116 218.593 331.934  1.00  0.00           C
ATOM   2093  HG  LEU X 131     219.186 218.593 332.138  1.00  0.00           H
ATOM   2094  CD1 LEU X 131     217.781 218.363 330.540  1.00  0.00           C
ATOM   2095 HD11 LEU X 131     218.263 217.427 330.256  1.00  0.00           H
ATOM   2096 HD12 LEU X 131     216.710 218.427 330.352  1.00  0.00           H
ATOM   2097 HD13 LEU X 131     218.186 219.127 329.876  1.00  0.00           H
ATOM   2098  CD2 LEU X 131     217.599 219.996 332.413  1.00  0.00           C
ATOM   2099 HD21 LEU X 131     216.575 219.871 332.765  1.00  0.00           H
ATOM   2100 HD22 LEU X 131     218.262 220.359 333.199  1.00  0.00           H
ATOM   2101 HD23 LEU X 131     217.722 220.660 331.558  1.00  0.00           H
ATOM   2102  C   LEU X 131     216.844 216.873 335.189  1.00  0.00           C
ATOM   2103  O   LEU X 131     215.636 217.013 335.081  1.00  0.00           O
ATOM   2104  N   ARG X 132     217.445 216.230 336.203  1.00  0.00           N
ATOM   2105  H   ARG X 132     218.451 216.166 336.143  1.00  0.00           H
ATOM   2106  CA  ARG X 132     216.801 215.686 337.353  1.00  0.00           C
ATOM   2107  HA  ARG X 132     215.750 215.971 337.421  1.00  0.00           H
ATOM   2108  CB  ARG X 132     216.878 214.103 337.342  1.00  0.00           C
ATOM   2109  HB2 ARG X 132     217.953 213.921 337.311  1.00  0.00           H
ATOM   2110  HB3 ARG X 132     216.253 213.739 338.158  1.00  0.00           H
ATOM   2111  CG  ARG X 132     216.268 213.412 336.063  1.00  0.00           C
ATOM   2112  HG2 ARG X 132     215.229 213.733 335.988  1.00  0.00           H
ATOM   2113  HG3 ARG X 132     216.722 213.792 335.147  1.00  0.00           H
ATOM   2114  CD  ARG X 132     216.441 211.879 336.202  1.00  0.00           C
ATOM   2115  HD2 ARG X 132     217.512 211.698 336.285  1.00  0.00           H
ATOM   2116  HD3 ARG X 132     216.019 211.627 337.175  1.00  0.00           H
ATOM   2117  NE  ARG X 132     215.854 211.127 335.053  1.00  0.00           N
ATOM   2118  HE  ARG X 132     216.450 210.860 334.282  1.00  0.00           H
ATOM   2119  CZ  ARG X 132     214.633 210.592 335.130  1.00  0.00           C
ATOM   2120  NH1 ARG X 132     213.840 210.855 336.158  1.00  0.00           N
ATOM   2121 HH11 ARG X 132     214.218 211.497 336.840  1.00  0.00           H
ATOM   2122 HH12 ARG X 132     212.945 210.398 336.254  1.00  0.00           H
ATOM   2123  NH2 ARG X 132     214.196 209.762 334.239  1.00  0.00           N
ATOM   2124 HH21 ARG X 132     214.814 209.425 333.515  1.00  0.00           H
ATOM   2125 HH22 ARG X 132     213.197 209.638 334.150  1.00  0.00           H
ATOM   2126  C   ARG X 132     217.429 216.218 338.653  1.00  0.00           C
ATOM   2127  O   ARG X 132     217.588 215.563 339.689  1.00  0.00           O
ATOM   2128  N   ASN X 133     217.976 217.453 338.497  1.00  0.00           N
ATOM   2129  H   ASN X 133     217.927 217.869 337.578  1.00  0.00           H
ATOM   2130  CA  ASN X 133     218.357 218.280 339.662  1.00  0.00           C
ATOM   2131  HA  ASN X 133     218.803 219.126 339.139  1.00  0.00           H
ATOM   2132  CB  ASN X 133     217.064 218.595 340.401  1.00  0.00           C
ATOM   2133  HB2 ASN X 133     216.252 218.372 339.709  1.00  0.00           H
ATOM   2134  HB3 ASN X 133     216.997 217.775 341.116  1.00  0.00           H
ATOM   2135  CG  ASN X 133     216.992 220.040 340.933  1.00  0.00           C
ATOM   2136  OD1 ASN X 133     216.937 221.023 340.194  1.00  0.00           O
ATOM   2137  ND2 ASN X 133     216.972 220.085 342.216  1.00  0.00           N
ATOM   2138 HD21 ASN X 133     216.837 220.978 342.667  1.00  0.00           H
ATOM   2139 HD22 ASN X 133     216.956 219.201 342.705  1.00  0.00           H
ATOM   2140  C   ASN X 133     219.564 217.866 340.521  1.00  0.00           C
ATOM   2141  O   ASN X 133     219.834 218.556 341.465  1.00  0.00           O
ATOM   2142  N   PHE X 134     220.350 216.824 340.225  1.00  0.00           N
ATOM   2143  H   PHE X 134     220.168 216.346 339.354  1.00  0.00           H
ATOM   2144  CA  PHE X 134     221.601 216.465 340.947  1.00  0.00           C
ATOM   2145  HA  PHE X 134     221.303 216.352 341.989  1.00  0.00           H
ATOM   2146  CB  PHE X 134     222.338 215.289 340.363  1.00  0.00           C
ATOM   2147  HB2 PHE X 134     222.293 215.330 339.275  1.00  0.00           H
ATOM   2148  HB3 PHE X 134     223.373 215.288 340.704  1.00  0.00           H
ATOM   2149  CG  PHE X 134     221.802 213.919 340.641  1.00  0.00           C
ATOM   2150  CD1 PHE X 134     222.591 212.992 341.258  1.00  0.00           C
ATOM   2151  HD1 PHE X 134     223.617 213.110 341.575  1.00  0.00           H
ATOM   2152  CE1 PHE X 134     222.082 211.688 341.563  1.00  0.00           C
ATOM   2153  HE1 PHE X 134     222.752 210.983 342.032  1.00  0.00           H
ATOM   2154  CZ  PHE X 134     220.764 211.288 341.184  1.00  0.00           C
ATOM   2155  HZ  PHE X 134     220.529 210.276 341.480  1.00  0.00           H
ATOM   2156  CE2 PHE X 134     220.075 212.186 340.353  1.00  0.00           C
ATOM   2157  HE2 PHE X 134     219.153 211.819 339.928  1.00  0.00           H
ATOM   2158  CD2 PHE X 134     220.585 213.478 340.078  1.00  0.00           C
ATOM   2159  HD2 PHE X 134     220.029 214.092 339.385  1.00  0.00           H
ATOM   2160  C   PHE X 134     222.572 217.576 340.874  1.00  0.00           C
ATOM   2161  O   PHE X 134     222.783 218.165 339.779  1.00  0.00           O
ATOM   2162  N   GLY X 135     223.263 217.882 341.995  1.00  0.00           N
ATOM   2163  H   GLY X 135     222.944 217.507 342.877  1.00  0.00           H
ATOM   2164  CA  GLY X 135     224.085 219.106 342.103  1.00  0.00           C
ATOM   2165  HA2 GLY X 135     224.720 218.937 342.973  1.00  0.00           H
ATOM   2166  HA3 GLY X 135     224.658 219.201 341.181  1.00  0.00           H
ATOM   2167  C   GLY X 135     223.390 220.381 342.399  1.00  0.00           C
ATOM   2168  O   GLY X 135     224.012 221.378 342.853  1.00  0.00           O
ATOM   2169  N   MET X 136     222.103 220.420 342.044  1.00  0.00           N
ATOM   2170  H   MET X 136     221.604 219.582 341.782  1.00  0.00           H
ATOM   2171  CA  MET X 136     221.378 221.713 342.001  1.00  0.00           C
ATOM   2172  HA  MET X 136     222.124 222.494 341.854  1.00  0.00           H
ATOM   2173  CB  MET X 136     220.458 221.946 340.763  1.00  0.00           C
ATOM   2174  HB2 MET X 136     219.534 221.400 340.953  1.00  0.00           H
ATOM   2175  HB3 MET X 136     220.199 223.005 340.794  1.00  0.00           H
ATOM   2176  CG  MET X 136     221.088 221.520 339.397  1.00  0.00           C
ATOM   2177  HG2 MET X 136     222.015 222.088 339.319  1.00  0.00           H
ATOM   2178  HG3 MET X 136     221.239 220.441 339.366  1.00  0.00           H
ATOM   2179  SD  MET X 136     220.187 221.970 337.915  1.00  0.00           S
ATOM   2180  CE  MET X 136     220.368 223.791 337.938  1.00  0.00           C
ATOM   2181  HE1 MET X 136     220.000 224.158 338.896  1.00  0.00           H
ATOM   2182  HE2 MET X 136     221.424 223.955 337.722  1.00  0.00           H
ATOM   2183  HE3 MET X 136     219.716 224.017 337.094  1.00  0.00           H
ATOM   2184  C   MET X 136     220.727 222.063 343.316  1.00  0.00           C
ATOM   2185  O   MET X 136     219.933 223.003 343.364  1.00  0.00           O
ATOM   2186  N   GLY X 137     221.143 221.453 344.443  1.00  0.00           N
ATOM   2187  H   GLY X 137     221.907 220.797 344.366  1.00  0.00           H
ATOM   2188  CA  GLY X 137     220.707 221.894 345.787  1.00  0.00           C
ATOM   2189  HA2 GLY X 137     221.217 221.321 346.562  1.00  0.00           H
ATOM   2190  HA3 GLY X 137     220.903 222.958 345.914  1.00  0.00           H
ATOM   2191  C   GLY X 137     219.211 221.822 346.080  1.00  0.00           C
ATOM   2192  O   GLY X 137     218.442 221.021 345.594  1.00  0.00           O
ATOM   2193  N   LYS X 138     218.738 222.768 346.908  1.00  0.00           N
ATOM   2194  H   LYS X 138     219.511 223.370 347.154  1.00  0.00           H
ATOM   2195  CA  LYS X 138     217.430 222.682 347.596  1.00  0.00           C
ATOM   2196  HA  LYS X 138     217.259 221.610 347.694  1.00  0.00           H
ATOM   2197  CB  LYS X 138     217.311 223.515 348.872  1.00  0.00           C
ATOM   2198  HB2 LYS X 138     216.252 223.494 349.130  1.00  0.00           H
ATOM   2199  HB3 LYS X 138     217.823 222.984 349.674  1.00  0.00           H
ATOM   2200  CG  LYS X 138     217.786 224.949 348.843  1.00  0.00           C
ATOM   2201  HG2 LYS X 138     218.812 225.036 348.485  1.00  0.00           H
ATOM   2202  HG3 LYS X 138     217.210 225.534 348.126  1.00  0.00           H
ATOM   2203  CD  LYS X 138     217.553 225.660 350.269  1.00  0.00           C
ATOM   2204  HD2 LYS X 138     216.608 225.324 350.697  1.00  0.00           H
ATOM   2205  HD3 LYS X 138     218.415 225.452 350.904  1.00  0.00           H
ATOM   2206  CE  LYS X 138     217.461 227.187 350.205  1.00  0.00           C
ATOM   2207  HE2 LYS X 138     218.421 227.585 349.877  1.00  0.00           H
ATOM   2208  HE3 LYS X 138     216.733 227.510 349.460  1.00  0.00           H
ATOM   2209  NZ  LYS X 138     217.055 227.671 351.559  1.00  0.00           N
ATOM   2210  HZ1 LYS X 138     217.102 228.675 351.661  1.00  0.00           H
ATOM   2211  HZ2 LYS X 138     217.549 227.133 352.257  1.00  0.00           H
ATOM   2212  HZ3 LYS X 138     216.123 227.308 351.701  1.00  0.00           H
ATOM   2213  C   LYS X 138     216.342 223.194 346.620  1.00  0.00           C
ATOM   2214  O   LYS X 138     215.168 222.871 346.894  1.00  0.00           O
ATOM   2215  N   ARG X 139     216.735 223.973 345.557  1.00  0.00           N
ATOM   2216  H   ARG X 139     217.722 224.116 345.399  1.00  0.00           H
ATOM   2217  CA  ARG X 139     215.775 224.477 344.586  1.00  0.00           C
ATOM   2218  HA  ARG X 139     214.935 224.738 345.229  1.00  0.00           H
ATOM   2219  CB  ARG X 139     216.296 225.695 343.825  1.00  0.00           C
ATOM   2220  HB2 ARG X 139     216.665 226.287 344.662  1.00  0.00           H
ATOM   2221  HB3 ARG X 139     217.104 225.397 343.157  1.00  0.00           H
ATOM   2222  CG  ARG X 139     215.287 226.534 343.072  1.00  0.00           C
ATOM   2223  HG2 ARG X 139     214.739 225.971 342.316  1.00  0.00           H
ATOM   2224  HG3 ARG X 139     214.536 226.791 343.819  1.00  0.00           H
ATOM   2225  CD  ARG X 139     215.887 227.597 342.246  1.00  0.00           C
ATOM   2226  HD2 ARG X 139     216.360 228.239 342.989  1.00  0.00           H
ATOM   2227  HD3 ARG X 139     216.489 227.148 341.456  1.00  0.00           H
ATOM   2228  NE  ARG X 139     214.826 228.450 341.548  1.00  0.00           N
ATOM   2229  HE  ARG X 139     213.883 228.491 341.908  1.00  0.00           H
ATOM   2230  CZ  ARG X 139     214.882 229.042 340.381  1.00  0.00           C
ATOM   2231  NH1 ARG X 139     216.053 229.252 339.761  1.00  0.00           N
ATOM   2232 HH11 ARG X 139     216.951 229.018 340.161  1.00  0.00           H
ATOM   2233 HH12 ARG X 139     216.033 229.660 338.837  1.00  0.00           H
ATOM   2234  NH2 ARG X 139     213.793 229.600 339.893  1.00  0.00           N
ATOM   2235 HH21 ARG X 139     212.940 229.302 340.345  1.00  0.00           H
ATOM   2236 HH22 ARG X 139     213.819 230.159 339.053  1.00  0.00           H
ATOM   2237  C   ARG X 139     215.259 223.432 343.609  1.00  0.00           C
ATOM   2238  O   ARG X 139     216.038 222.839 342.901  1.00  0.00           O
ATOM   2239  N   SER X 140     213.945 223.216 343.714  1.00  0.00           N
ATOM   2240  H   SER X 140     213.578 223.645 344.552  1.00  0.00           H
ATOM   2241  CA  SER X 140     213.151 222.423 342.799  1.00  0.00           C
ATOM   2242  HA  SER X 140     213.523 221.400 342.844  1.00  0.00           H
ATOM   2243  CB  SER X 140     211.723 222.446 343.314  1.00  0.00           C
ATOM   2244  HB2 SER X 140     211.269 221.681 342.684  1.00  0.00           H
ATOM   2245  HB3 SER X 140     211.675 222.097 344.346  1.00  0.00           H
ATOM   2246  OG  SER X 140     210.958 223.642 343.149  1.00  0.00           O
ATOM   2247  HG  SER X 140     211.408 224.304 343.679  1.00  0.00           H
ATOM   2248  C   SER X 140     213.347 222.861 341.291  1.00  0.00           C
ATOM   2249  O   SER X 140     213.924 223.909 340.981  1.00  0.00           O
ATOM   2250  N   ILE X 141     212.955 221.983 340.346  1.00  0.00           N
ATOM   2251  H   ILE X 141     212.676 221.054 340.627  1.00  0.00           H
ATOM   2252  CA  ILE X 141     212.783 222.273 338.899  1.00  0.00           C
ATOM   2253  HA  ILE X 141     213.507 223.040 338.624  1.00  0.00           H
ATOM   2254  CB  ILE X 141     212.967 221.027 337.988  1.00  0.00           C
ATOM   2255  HB  ILE X 141     212.307 220.295 338.453  1.00  0.00           H
ATOM   2256  CG2 ILE X 141     212.458 221.361 336.577  1.00  0.00           C
ATOM   2257 HG21 ILE X 141     213.050 222.115 336.059  1.00  0.00           H
ATOM   2258 HG22 ILE X 141     211.427 221.698 336.680  1.00  0.00           H
ATOM   2259 HG23 ILE X 141     212.429 220.488 335.924  1.00  0.00           H
ATOM   2260  CG1 ILE X 141     214.478 220.669 338.035  1.00  0.00           C
ATOM   2261 HG12 ILE X 141     214.969 221.636 337.930  1.00  0.00           H
ATOM   2262 HG13 ILE X 141     214.685 220.333 339.051  1.00  0.00           H
ATOM   2263  CD1 ILE X 141     214.975 219.766 336.920  1.00  0.00           C
ATOM   2264 HD11 ILE X 141     214.984 220.140 335.896  1.00  0.00           H
ATOM   2265 HD12 ILE X 141     216.022 219.517 337.092  1.00  0.00           H
ATOM   2266 HD13 ILE X 141     214.324 218.893 336.868  1.00  0.00           H
ATOM   2267  C   ILE X 141     211.435 222.915 338.682  1.00  0.00           C
ATOM   2268  O   ILE X 141     211.322 223.907 337.980  1.00  0.00           O
ATOM   2269  N   GLU X 142     210.421 222.332 339.262  1.00  0.00           N
ATOM   2270  H   GLU X 142     210.599 221.607 339.942  1.00  0.00           H
ATOM   2271  CA  GLU X 142     209.047 222.830 339.190  1.00  0.00           C
ATOM   2272  HA  GLU X 142     208.739 222.706 338.151  1.00  0.00           H
ATOM   2273  CB  GLU X 142     208.157 221.923 340.033  1.00  0.00           C
ATOM   2274  HB2 GLU X 142     208.418 220.868 339.947  1.00  0.00           H
ATOM   2275  HB3 GLU X 142     208.296 222.186 341.082  1.00  0.00           H
ATOM   2276  CG  GLU X 142     206.643 222.028 339.687  1.00  0.00           C
ATOM   2277  HG2 GLU X 142     206.370 222.716 338.886  1.00  0.00           H
ATOM   2278  HG3 GLU X 142     206.271 221.039 339.418  1.00  0.00           H
ATOM   2279  CD  GLU X 142     205.751 222.548 340.801  1.00  0.00           C
ATOM   2280  OE1 GLU X 142     206.230 223.258 341.707  1.00  0.00           O
ATOM   2281  OE2 GLU X 142     204.493 222.371 340.733  1.00  0.00           O
ATOM   2282  C   GLU X 142     208.780 224.279 339.605  1.00  0.00           C
ATOM   2283  O   GLU X 142     207.994 224.916 338.912  1.00  0.00           O
ATOM   2284  N   ASP X 143     209.567 224.946 340.473  1.00  0.00           N
ATOM   2285  H   ASP X 143     210.188 224.419 341.071  1.00  0.00           H
ATOM   2286  CA  ASP X 143     209.519 226.399 340.661  1.00  0.00           C
ATOM   2287  HA  ASP X 143     208.516 226.734 340.924  1.00  0.00           H
ATOM   2288  CB  ASP X 143     210.544 226.805 341.715  1.00  0.00           C
ATOM   2289  HB2 ASP X 143     210.363 226.307 342.668  1.00  0.00           H
ATOM   2290  HB3 ASP X 143     211.495 226.341 341.455  1.00  0.00           H
ATOM   2291  CG  ASP X 143     210.761 228.312 341.948  1.00  0.00           C
ATOM   2292  OD1 ASP X 143     211.979 228.790 341.836  1.00  0.00           O
ATOM   2293  OD2 ASP X 143     209.766 229.069 342.156  1.00  0.00           O
ATOM   2294  C   ASP X 143     209.748 227.191 339.411  1.00  0.00           C
ATOM   2295  O   ASP X 143     209.001 228.130 339.010  1.00  0.00           O
ATOM   2296  N   ARG X 144     210.800 226.822 338.665  1.00  0.00           N
ATOM   2297  H   ARG X 144     211.382 226.073 339.010  1.00  0.00           H
ATOM   2298  CA  ARG X 144     211.168 227.390 337.386  1.00  0.00           C
ATOM   2299  HA  ARG X 144     211.230 228.476 337.461  1.00  0.00           H
ATOM   2300  CB  ARG X 144     212.483 226.708 336.821  1.00  0.00           C
ATOM   2301  HB2 ARG X 144     212.246 225.717 336.434  1.00  0.00           H
ATOM   2302  HB3 ARG X 144     212.804 227.279 335.950  1.00  0.00           H
ATOM   2303  CG  ARG X 144     213.704 226.629 337.796  1.00  0.00           C
ATOM   2304  HG2 ARG X 144     214.051 227.651 337.944  1.00  0.00           H
ATOM   2305  HG3 ARG X 144     213.506 226.095 338.726  1.00  0.00           H
ATOM   2306  CD  ARG X 144     214.843 225.824 337.232  1.00  0.00           C
ATOM   2307  HD2 ARG X 144     214.524 224.862 336.831  1.00  0.00           H
ATOM   2308  HD3 ARG X 144     215.198 226.476 336.435  1.00  0.00           H
ATOM   2309  NE  ARG X 144     215.947 225.625 338.177  1.00  0.00           N
ATOM   2310  HE  ARG X 144     215.916 224.800 338.758  1.00  0.00           H
ATOM   2311  CZ  ARG X 144     217.072 226.320 338.350  1.00  0.00           C
ATOM   2312  NH1 ARG X 144     217.400 227.282 337.567  1.00  0.00           N
ATOM   2313 HH11 ARG X 144     216.719 227.628 336.907  1.00  0.00           H
ATOM   2314 HH12 ARG X 144     218.313 227.707 337.646  1.00  0.00           H
ATOM   2315  NH2 ARG X 144     217.973 225.977 339.222  1.00  0.00           N
ATOM   2316 HH21 ARG X 144     217.858 225.220 339.880  1.00  0.00           H
ATOM   2317 HH22 ARG X 144     218.812 226.538 339.223  1.00  0.00           H
ATOM   2318  C   ARG X 144     210.037 227.130 336.373  1.00  0.00           C
ATOM   2319  O   ARG X 144     209.842 227.910 335.435  1.00  0.00           O
ATOM   2320  N   VAL X 145     209.346 225.982 336.481  1.00  0.00           N
ATOM   2321  H   VAL X 145     209.559 225.299 337.194  1.00  0.00           H
ATOM   2322  CA  VAL X 145     208.261 225.704 335.540  1.00  0.00           C
ATOM   2323  HA  VAL X 145     208.676 226.037 334.589  1.00  0.00           H
ATOM   2324  CB  VAL X 145     207.848 224.256 335.403  1.00  0.00           C
ATOM   2325  HB  VAL X 145     207.331 223.836 336.266  1.00  0.00           H
ATOM   2326  CG1 VAL X 145     206.835 224.024 334.275  1.00  0.00           C
ATOM   2327 HG11 VAL X 145     207.202 224.346 333.301  1.00  0.00           H
ATOM   2328 HG12 VAL X 145     206.675 222.946 334.248  1.00  0.00           H
ATOM   2329 HG13 VAL X 145     205.873 224.503 334.457  1.00  0.00           H
ATOM   2330  CG2 VAL X 145     209.120 223.538 334.967  1.00  0.00           C
ATOM   2331 HG21 VAL X 145     208.924 222.487 334.755  1.00  0.00           H
ATOM   2332 HG22 VAL X 145     209.880 223.605 335.746  1.00  0.00           H
ATOM   2333 HG23 VAL X 145     209.509 224.017 334.068  1.00  0.00           H
ATOM   2334  C   VAL X 145     207.024 226.558 335.876  1.00  0.00           C
ATOM   2335  O   VAL X 145     206.501 227.273 334.979  1.00  0.00           O
ATOM   2336  N   GLN X 146     206.651 226.568 337.136  1.00  0.00           N
ATOM   2337  H   GLN X 146     207.113 225.969 337.806  1.00  0.00           H
ATOM   2338  CA  GLN X 146     205.471 227.167 337.719  1.00  0.00           C
ATOM   2339  HA  GLN X 146     204.659 226.600 337.265  1.00  0.00           H
ATOM   2340  CB  GLN X 146     205.392 227.013 339.257  1.00  0.00           C
ATOM   2341  HB2 GLN X 146     206.343 227.141 339.773  1.00  0.00           H
ATOM   2342  HB3 GLN X 146     204.648 227.727 339.611  1.00  0.00           H
ATOM   2343  CG  GLN X 146     204.854 225.624 339.614  1.00  0.00           C
ATOM   2344  HG2 GLN X 146     205.461 224.904 339.065  1.00  0.00           H
ATOM   2345  HG3 GLN X 146     205.041 225.458 340.674  1.00  0.00           H
ATOM   2346  CD  GLN X 146     203.355 225.494 339.586  1.00  0.00           C
ATOM   2347  OE1 GLN X 146     202.712 226.286 338.994  1.00  0.00           O
ATOM   2348  NE2 GLN X 146     202.729 224.471 340.103  1.00  0.00           N
ATOM   2349 HE21 GLN X 146     201.720 224.506 340.146  1.00  0.00           H
ATOM   2350 HE22 GLN X 146     203.319 223.749 340.491  1.00  0.00           H
ATOM   2351  C   GLN X 146     205.385 228.637 337.336  1.00  0.00           C
ATOM   2352  O   GLN X 146     204.265 229.089 337.026  1.00  0.00           O
ATOM   2353  N   GLU X 147     206.437 229.456 337.332  1.00  0.00           N
ATOM   2354  H   GLU X 147     207.299 229.138 337.750  1.00  0.00           H
ATOM   2355  CA  GLU X 147     206.335 230.828 336.846  1.00  0.00           C
ATOM   2356  HA  GLU X 147     205.721 231.470 337.478  1.00  0.00           H
ATOM   2357  CB  GLU X 147     207.774 231.406 336.874  1.00  0.00           C
ATOM   2358  HB2 GLU X 147     208.279 231.223 337.822  1.00  0.00           H
ATOM   2359  HB3 GLU X 147     208.497 231.072 336.129  1.00  0.00           H
ATOM   2360  CG  GLU X 147     207.756 232.949 336.698  1.00  0.00           C
ATOM   2361  HG2 GLU X 147     208.765 233.260 336.428  1.00  0.00           H
ATOM   2362  HG3 GLU X 147     207.285 233.078 335.723  1.00  0.00           H
ATOM   2363  CD  GLU X 147     207.147 233.824 337.860  1.00  0.00           C
ATOM   2364  OE1 GLU X 147     207.174 235.073 337.745  1.00  0.00           O
ATOM   2365  OE2 GLU X 147     206.451 233.308 338.791  1.00  0.00           O
ATOM   2366  C   GLU X 147     205.719 230.920 335.411  1.00  0.00           C
ATOM   2367  O   GLU X 147     204.819 231.678 335.181  1.00  0.00           O
ATOM   2368  N   GLU X 148     206.290 230.201 334.470  1.00  0.00           N
ATOM   2369  H   GLU X 148     206.994 229.533 334.749  1.00  0.00           H
ATOM   2370  CA  GLU X 148     205.869 230.286 333.097  1.00  0.00           C
ATOM   2371  HA  GLU X 148     205.839 231.333 332.794  1.00  0.00           H
ATOM   2372  CB  GLU X 148     206.828 229.575 332.152  1.00  0.00           C
ATOM   2373  HB2 GLU X 148     206.577 228.520 332.253  1.00  0.00           H
ATOM   2374  HB3 GLU X 148     206.717 229.844 331.101  1.00  0.00           H
ATOM   2375  CG  GLU X 148     208.282 229.765 332.471  1.00  0.00           C
ATOM   2376  HG2 GLU X 148     208.439 229.221 333.402  1.00  0.00           H
ATOM   2377  HG3 GLU X 148     208.948 229.317 331.733  1.00  0.00           H
ATOM   2378  CD  GLU X 148     208.772 231.162 332.596  1.00  0.00           C
ATOM   2379  OE1 GLU X 148     208.170 232.072 331.909  1.00  0.00           O
ATOM   2380  OE2 GLU X 148     209.806 231.428 333.231  1.00  0.00           O
ATOM   2381  C   GLU X 148     204.445 229.814 332.864  1.00  0.00           C
ATOM   2382  O   GLU X 148     203.761 230.339 331.929  1.00  0.00           O
ATOM   2383  N   ALA X 149     203.937 228.857 333.654  1.00  0.00           N
ATOM   2384  H   ALA X 149     204.503 228.541 334.428  1.00  0.00           H
ATOM   2385  CA  ALA X 149     202.438 228.468 333.577  1.00  0.00           C
ATOM   2386  HA  ALA X 149     202.296 228.000 332.603  1.00  0.00           H
ATOM   2387  CB  ALA X 149     202.195 227.416 334.650  1.00  0.00           C
ATOM   2388  HB1 ALA X 149     202.608 227.746 335.603  1.00  0.00           H
ATOM   2389  HB2 ALA X 149     202.695 226.464 334.473  1.00  0.00           H
ATOM   2390  HB3 ALA X 149     201.124 227.262 334.774  1.00  0.00           H
ATOM   2391  C   ALA X 149     201.485 229.589 333.826  1.00  0.00           C
ATOM   2392  O   ALA X 149     200.467 229.746 333.109  1.00  0.00           O
ATOM   2393  N   ARG X 150     201.787 230.446 334.812  1.00  0.00           N
ATOM   2394  H   ARG X 150     202.488 230.029 335.408  1.00  0.00           H
ATOM   2395  CA  ARG X 150     201.086 231.723 335.056  1.00  0.00           C
ATOM   2396  HA  ARG X 150     200.005 231.604 334.984  1.00  0.00           H
ATOM   2397  CB  ARG X 150     201.490 232.220 336.449  1.00  0.00           C
ATOM   2398  HB2 ARG X 150     201.469 231.463 337.234  1.00  0.00           H
ATOM   2399  HB3 ARG X 150     202.493 232.646 336.404  1.00  0.00           H
ATOM   2400  CG  ARG X 150     200.649 233.468 336.800  1.00  0.00           C
ATOM   2401  HG2 ARG X 150     200.922 234.259 336.101  1.00  0.00           H
ATOM   2402  HG3 ARG X 150     199.606 233.160 336.720  1.00  0.00           H
ATOM   2403  CD  ARG X 150     200.893 233.854 338.203  1.00  0.00           C
ATOM   2404  HD2 ARG X 150     199.993 234.406 338.476  1.00  0.00           H
ATOM   2405  HD3 ARG X 150     201.133 233.027 338.871  1.00  0.00           H
ATOM   2406  NE  ARG X 150     202.051 234.763 338.279  1.00  0.00           N
ATOM   2407  HE  ARG X 150     201.911 235.735 338.041  1.00  0.00           H
ATOM   2408  CZ  ARG X 150     203.319 234.429 338.471  1.00  0.00           C
ATOM   2409  NH1 ARG X 150     203.707 233.193 338.778  1.00  0.00           N
ATOM   2410 HH11 ARG X 150     203.127 232.418 339.065  1.00  0.00           H
ATOM   2411 HH12 ARG X 150     204.699 233.024 338.854  1.00  0.00           H
ATOM   2412  NH2 ARG X 150     204.225 235.331 338.461  1.00  0.00           N
ATOM   2413 HH21 ARG X 150     204.165 236.230 338.004  1.00  0.00           H
ATOM   2414 HH22 ARG X 150     205.176 234.991 338.455  1.00  0.00           H
ATOM   2415  C   ARG X 150     201.506 232.726 333.965  1.00  0.00           C
ATOM   2416  O   ARG X 150     200.586 233.275 333.344  1.00  0.00           O
ATOM   2417  N   CYS X 151     202.777 233.058 333.595  1.00  0.00           N
ATOM   2418  H   CYS X 151     203.570 232.588 334.008  1.00  0.00           H
ATOM   2419  CA  CYS X 151     203.033 234.039 332.510  1.00  0.00           C
ATOM   2420  HA  CYS X 151     202.446 234.927 332.746  1.00  0.00           H
ATOM   2421  CB  CYS X 151     204.545 234.444 332.532  1.00  0.00           C
ATOM   2422  HB2 CYS X 151     205.248 233.706 332.149  1.00  0.00           H
ATOM   2423  HB3 CYS X 151     204.666 235.337 331.918  1.00  0.00           H
ATOM   2424  SG  CYS X 151     204.948 234.829 334.269  1.00  0.00           S
ATOM   2425  HG  CYS X 151     204.875 233.564 334.693  1.00  0.00           H
ATOM   2426  C   CYS X 151     202.510 233.698 331.152  1.00  0.00           C
ATOM   2427  O   CYS X 151     202.167 234.637 330.421  1.00  0.00           O
ATOM   2428  N   LEU X 152     202.260 232.416 330.873  1.00  0.00           N
ATOM   2429  H   LEU X 152     202.499 231.738 331.583  1.00  0.00           H
ATOM   2430  CA  LEU X 152     201.388 231.974 329.782  1.00  0.00           C
ATOM   2431  HA  LEU X 152     201.739 232.539 328.918  1.00  0.00           H
ATOM   2432  CB  LEU X 152     201.800 230.528 329.665  1.00  0.00           C
ATOM   2433  HB2 LEU X 152     202.821 230.363 329.320  1.00  0.00           H
ATOM   2434  HB3 LEU X 152     201.714 230.054 330.643  1.00  0.00           H
ATOM   2435  CG  LEU X 152     200.845 229.759 328.581  1.00  0.00           C
ATOM   2436  HG  LEU X 152     199.802 229.859 328.883  1.00  0.00           H
ATOM   2437  CD1 LEU X 152     200.993 230.569 327.259  1.00  0.00           C
ATOM   2438 HD11 LEU X 152     200.325 230.073 326.555  1.00  0.00           H
ATOM   2439 HD12 LEU X 152     200.654 231.593 327.411  1.00  0.00           H
ATOM   2440 HD13 LEU X 152     202.030 230.663 326.937  1.00  0.00           H
ATOM   2441  CD2 LEU X 152     201.440 228.371 328.269  1.00  0.00           C
ATOM   2442 HD21 LEU X 152     201.357 227.758 329.166  1.00  0.00           H
ATOM   2443 HD22 LEU X 152     200.792 227.918 327.519  1.00  0.00           H
ATOM   2444 HD23 LEU X 152     202.506 228.355 328.038  1.00  0.00           H
ATOM   2445  C   LEU X 152     199.821 232.233 330.033  1.00  0.00           C
ATOM   2446  O   LEU X 152     199.190 232.725 329.086  1.00  0.00           O
ATOM   2447  N   VAL X 153     199.238 231.957 331.215  1.00  0.00           N
ATOM   2448  H   VAL X 153     199.734 231.481 331.954  1.00  0.00           H
ATOM   2449  CA  VAL X 153     197.814 232.281 331.493  1.00  0.00           C
ATOM   2450  HA  VAL X 153     197.284 231.785 330.680  1.00  0.00           H
ATOM   2451  CB  VAL X 153     197.451 231.768 332.877  1.00  0.00           C
ATOM   2452  HB  VAL X 153     198.265 231.962 333.576  1.00  0.00           H
ATOM   2453  CG1 VAL X 153     196.126 232.256 333.365  1.00  0.00           C
ATOM   2454 HG11 VAL X 153     195.354 231.871 332.699  1.00  0.00           H
ATOM   2455 HG12 VAL X 153     195.872 231.885 334.358  1.00  0.00           H
ATOM   2456 HG13 VAL X 153     195.952 233.332 333.382  1.00  0.00           H
ATOM   2457  CG2 VAL X 153     197.337 230.251 332.533  1.00  0.00           C
ATOM   2458 HG21 VAL X 153     196.635 230.095 331.714  1.00  0.00           H
ATOM   2459 HG22 VAL X 153     196.897 229.789 333.417  1.00  0.00           H
ATOM   2460 HG23 VAL X 153     198.350 229.886 332.363  1.00  0.00           H
ATOM   2461  C   VAL X 153     197.632 233.860 331.332  1.00  0.00           C
ATOM   2462  O   VAL X 153     196.773 234.324 330.746  1.00  0.00           O
ATOM   2463  N   GLU X 154     198.586 234.589 331.915  1.00  0.00           N
ATOM   2464  H   GLU X 154     199.347 234.080 332.344  1.00  0.00           H
ATOM   2465  CA  GLU X 154     198.756 236.036 331.734  1.00  0.00           C
ATOM   2466  HA  GLU X 154     197.810 236.490 332.026  1.00  0.00           H
ATOM   2467  CB  GLU X 154     199.814 236.543 332.758  1.00  0.00           C
ATOM   2468  HB2 GLU X 154     200.712 235.926 332.737  1.00  0.00           H
ATOM   2469  HB3 GLU X 154     200.149 237.523 332.418  1.00  0.00           H
ATOM   2470  CG  GLU X 154     199.528 236.505 334.272  1.00  0.00           C
ATOM   2471  HG2 GLU X 154     199.366 235.463 334.547  1.00  0.00           H
ATOM   2472  HG3 GLU X 154     200.443 236.839 334.761  1.00  0.00           H
ATOM   2473  CD  GLU X 154     198.246 237.243 334.716  1.00  0.00           C
ATOM   2474  OE1 GLU X 154     197.535 237.836 333.879  1.00  0.00           O
ATOM   2475  OE2 GLU X 154     197.960 237.365 335.917  1.00  0.00           O
ATOM   2476  C   GLU X 154     198.898 236.544 330.321  1.00  0.00           C
ATOM   2477  O   GLU X 154     198.260 237.565 330.062  1.00  0.00           O
ATOM   2478  N   GLU X 155     199.626 235.805 329.380  1.00  0.00           N
ATOM   2479  H   GLU X 155     200.032 234.924 329.660  1.00  0.00           H
ATOM   2480  CA  GLU X 155     199.710 236.217 327.989  1.00  0.00           C
ATOM   2481  HA  GLU X 155     199.873 237.294 327.982  1.00  0.00           H
ATOM   2482  CB  GLU X 155     200.913 235.593 327.290  1.00  0.00           C
ATOM   2483  HB2 GLU X 155     201.714 235.468 328.019  1.00  0.00           H
ATOM   2484  HB3 GLU X 155     200.761 234.610 326.844  1.00  0.00           H
ATOM   2485  CG  GLU X 155     201.550 236.505 326.215  1.00  0.00           C
ATOM   2486  HG2 GLU X 155     202.407 235.888 325.946  1.00  0.00           H
ATOM   2487  HG3 GLU X 155     200.952 236.680 325.320  1.00  0.00           H
ATOM   2488  CD  GLU X 155     202.072 237.899 326.675  1.00  0.00           C
ATOM   2489  OE1 GLU X 155     202.414 238.069 327.849  1.00  0.00           O
ATOM   2490  OE2 GLU X 155     202.047 238.787 325.800  1.00  0.00           O
ATOM   2491  C   GLU X 155     198.426 235.967 327.163  1.00  0.00           C
ATOM   2492  O   GLU X 155     198.105 236.661 326.231  1.00  0.00           O
ATOM   2493  N   LEU X 156     197.657 234.936 327.614  1.00  0.00           N
ATOM   2494  H   LEU X 156     198.038 234.481 328.431  1.00  0.00           H
ATOM   2495  CA  LEU X 156     196.397 234.528 326.964  1.00  0.00           C
ATOM   2496  HA  LEU X 156     196.444 234.905 325.942  1.00  0.00           H
ATOM   2497  CB  LEU X 156     196.252 233.018 327.088  1.00  0.00           C
ATOM   2498  HB2 LEU X 156     196.402 232.704 328.121  1.00  0.00           H
ATOM   2499  HB3 LEU X 156     195.274 232.689 326.739  1.00  0.00           H
ATOM   2500  CG  LEU X 156     197.387 232.260 326.290  1.00  0.00           C
ATOM   2501  HG  LEU X 156     198.370 232.686 326.491  1.00  0.00           H
ATOM   2502  CD1 LEU X 156     197.469 230.691 326.368  1.00  0.00           C
ATOM   2503 HD11 LEU X 156     198.216 230.331 325.660  1.00  0.00           H
ATOM   2504 HD12 LEU X 156     198.016 230.566 327.303  1.00  0.00           H
ATOM   2505 HD13 LEU X 156     196.516 230.165 326.317  1.00  0.00           H
ATOM   2506  CD2 LEU X 156     197.159 232.630 324.826  1.00  0.00           C
ATOM   2507 HD21 LEU X 156     196.101 232.535 324.582  1.00  0.00           H
ATOM   2508 HD22 LEU X 156     197.564 233.634 324.706  1.00  0.00           H
ATOM   2509 HD23 LEU X 156     197.722 231.857 324.302  1.00  0.00           H
ATOM   2510  C   LEU X 156     195.195 235.289 327.565  1.00  0.00           C
ATOM   2511  O   LEU X 156     194.222 235.451 326.803  1.00  0.00           O
ATOM   2512  N   ARG X 157     195.387 235.909 328.726  1.00  0.00           N
ATOM   2513  H   ARG X 157     196.223 235.763 329.273  1.00  0.00           H
ATOM   2514  CA  ARG X 157     194.472 236.944 329.225  1.00  0.00           C
ATOM   2515  HA  ARG X 157     193.485 236.480 329.249  1.00  0.00           H
ATOM   2516  CB  ARG X 157     194.828 237.328 330.660  1.00  0.00           C
ATOM   2517  HB2 ARG X 157     195.374 236.490 331.094  1.00  0.00           H
ATOM   2518  HB3 ARG X 157     195.598 238.098 330.620  1.00  0.00           H
ATOM   2519  CG  ARG X 157     193.687 237.865 331.453  1.00  0.00           C
ATOM   2520  HG2 ARG X 157     193.058 238.506 330.836  1.00  0.00           H
ATOM   2521  HG3 ARG X 157     193.035 237.008 331.622  1.00  0.00           H
ATOM   2522  CD  ARG X 157     194.007 238.514 332.841  1.00  0.00           C
ATOM   2523  HD2 ARG X 157     194.465 239.483 332.644  1.00  0.00           H
ATOM   2524  HD3 ARG X 157     193.024 238.763 333.242  1.00  0.00           H
ATOM   2525  NE  ARG X 157     194.789 237.670 333.795  1.00  0.00           N
ATOM   2526  HE  ARG X 157     195.791 237.799 333.808  1.00  0.00           H
ATOM   2527  CZ  ARG X 157     194.369 236.768 334.596  1.00  0.00           C
ATOM   2528  NH1 ARG X 157     193.173 236.605 334.993  1.00  0.00           N
ATOM   2529 HH11 ARG X 157     192.453 237.150 334.541  1.00  0.00           H
ATOM   2530 HH12 ARG X 157     193.041 235.999 335.791  1.00  0.00           H
ATOM   2531  NH2 ARG X 157     195.290 236.014 335.134  1.00  0.00           N
ATOM   2532 HH21 ARG X 157     196.280 236.206 335.080  1.00  0.00           H
ATOM   2533 HH22 ARG X 157     194.967 235.317 335.790  1.00  0.00           H
ATOM   2534  C   ARG X 157     194.378 238.137 328.333  1.00  0.00           C
ATOM   2535  O   ARG X 157     193.281 238.661 328.005  1.00  0.00           O
ATOM   2536  N   LYS X 158     195.517 238.557 327.733  1.00  0.00           N
ATOM   2537  H   LYS X 158     196.334 238.037 328.018  1.00  0.00           H
ATOM   2538  CA  LYS X 158     195.625 239.820 326.924  1.00  0.00           C
ATOM   2539  HA  LYS X 158     195.264 240.683 327.483  1.00  0.00           H
ATOM   2540  CB  LYS X 158     197.120 240.027 326.498  1.00  0.00           C
ATOM   2541  HB2 LYS X 158     197.466 239.183 325.900  1.00  0.00           H
ATOM   2542  HB3 LYS X 158     197.163 240.976 325.963  1.00  0.00           H
ATOM   2543  CG  LYS X 158     197.906 240.183 327.787  1.00  0.00           C
ATOM   2544  HG2 LYS X 158     197.570 241.094 328.280  1.00  0.00           H
ATOM   2545  HG3 LYS X 158     197.732 239.304 328.408  1.00  0.00           H
ATOM   2546  CD  LYS X 158     199.366 240.392 327.453  1.00  0.00           C
ATOM   2547  HD2 LYS X 158     199.773 239.605 326.817  1.00  0.00           H
ATOM   2548  HD3 LYS X 158     199.521 241.255 326.806  1.00  0.00           H
ATOM   2549  CE  LYS X 158     200.117 240.447 328.781  1.00  0.00           C
ATOM   2550  HE2 LYS X 158     199.747 241.236 329.437  1.00  0.00           H
ATOM   2551  HE3 LYS X 158     199.915 239.552 329.370  1.00  0.00           H
ATOM   2552  NZ  LYS X 158     201.574 240.595 328.589  1.00  0.00           N
ATOM   2553  HZ1 LYS X 158     201.862 239.879 327.936  1.00  0.00           H
ATOM   2554  HZ2 LYS X 158     202.128 240.413 329.414  1.00  0.00           H
ATOM   2555  HZ3 LYS X 158     201.812 241.553 328.374  1.00  0.00           H
ATOM   2556  C   LYS X 158     194.712 239.733 325.718  1.00  0.00           C
ATOM   2557  O   LYS X 158     194.425 240.770 325.105  1.00  0.00           O
ATOM   2558  N   THR X 159     194.311 238.520 325.233  1.00  0.00           N
ATOM   2559  H   THR X 159     194.801 237.713 325.592  1.00  0.00           H
ATOM   2560  CA  THR X 159     193.394 238.338 324.089  1.00  0.00           C
ATOM   2561  HA  THR X 159     193.821 238.849 323.226  1.00  0.00           H
ATOM   2562  CB  THR X 159     193.288 236.811 323.685  1.00  0.00           C
ATOM   2563  HB  THR X 159     192.632 236.712 322.821  1.00  0.00           H
ATOM   2564  CG2 THR X 159     194.591 236.167 323.351  1.00  0.00           C
ATOM   2565 HG21 THR X 159     195.188 236.764 322.662  1.00  0.00           H
ATOM   2566 HG22 THR X 159     194.267 235.192 322.987  1.00  0.00           H
ATOM   2567 HG23 THR X 159     195.272 236.042 324.193  1.00  0.00           H
ATOM   2568  OG1 THR X 159     192.663 236.087 324.660  1.00  0.00           O
ATOM   2569  HG1 THR X 159     193.298 235.846 325.338  1.00  0.00           H
ATOM   2570  C   THR X 159     191.995 238.925 324.288  1.00  0.00           C
ATOM   2571  O   THR X 159     191.321 239.392 323.390  1.00  0.00           O
ATOM   2572  N   LYS X 160     191.522 239.078 325.479  1.00  0.00           N
ATOM   2573  H   LYS X 160     192.119 238.828 326.254  1.00  0.00           H
ATOM   2574  CA  LYS X 160     190.180 239.580 325.879  1.00  0.00           C
ATOM   2575  HA  LYS X 160     189.958 239.302 326.909  1.00  0.00           H
ATOM   2576  CB  LYS X 160     190.109 241.143 325.910  1.00  0.00           C
ATOM   2577  HB2 LYS X 160     190.153 241.503 324.881  1.00  0.00           H
ATOM   2578  HB3 LYS X 160     189.105 241.421 326.230  1.00  0.00           H
ATOM   2579  CG  LYS X 160     191.315 241.734 326.778  1.00  0.00           C
ATOM   2580  HG2 LYS X 160     191.092 241.347 327.772  1.00  0.00           H
ATOM   2581  HG3 LYS X 160     192.246 241.288 326.430  1.00  0.00           H
ATOM   2582  CD  LYS X 160     191.288 243.256 326.719  1.00  0.00           C
ATOM   2583  HD2 LYS X 160     191.192 243.743 325.749  1.00  0.00           H
ATOM   2584  HD3 LYS X 160     190.469 243.648 327.323  1.00  0.00           H
ATOM   2585  CE  LYS X 160     192.663 243.667 327.268  1.00  0.00           C
ATOM   2586  HE2 LYS X 160     192.894 243.089 328.163  1.00  0.00           H
ATOM   2587  HE3 LYS X 160     193.394 243.382 326.512  1.00  0.00           H
ATOM   2588  NZ  LYS X 160     192.778 245.096 327.496  1.00  0.00           N
ATOM   2589  HZ1 LYS X 160     192.461 245.695 326.747  1.00  0.00           H
ATOM   2590  HZ2 LYS X 160     193.738 245.260 327.766  1.00  0.00           H
ATOM   2591  HZ3 LYS X 160     192.225 245.345 328.303  1.00  0.00           H
ATOM   2592  C   LYS X 160     189.030 238.995 325.067  1.00  0.00           C
ATOM   2593  O   LYS X 160     188.361 239.648 324.251  1.00  0.00           O
ATOM   2594  N   ALA X 161     189.049 237.685 324.878  1.00  0.00           N
ATOM   2595  H   ALA X 161     189.549 237.088 325.522  1.00  0.00           H
ATOM   2596  CA  ALA X 161     188.201 236.845 324.065  1.00  0.00           C
ATOM   2597  HA  ALA X 161     188.662 235.871 324.230  1.00  0.00           H
ATOM   2598  CB  ALA X 161     186.719 236.895 324.648  1.00  0.00           C
ATOM   2599  HB1 ALA X 161     186.266 237.843 324.355  1.00  0.00           H
ATOM   2600  HB2 ALA X 161     186.592 236.787 325.725  1.00  0.00           H
ATOM   2601  HB3 ALA X 161     186.069 236.153 324.185  1.00  0.00           H
ATOM   2602  C   ALA X 161     188.364 237.085 322.536  1.00  0.00           C
ATOM   2603  O   ALA X 161     187.796 236.408 321.718  1.00  0.00           O
ATOM   2604  N   SER X 162     189.154 238.059 322.034  1.00  0.00           N
ATOM   2605  H   SER X 162     189.667 238.582 322.729  1.00  0.00           H
ATOM   2606  CA  SER X 162     189.415 238.248 320.595  1.00  0.00           C
ATOM   2607  HA  SER X 162     188.407 238.216 320.180  1.00  0.00           H
ATOM   2608  CB  SER X 162     190.007 239.628 320.407  1.00  0.00           C
ATOM   2609  HB2 SER X 162     189.448 240.499 320.749  1.00  0.00           H
ATOM   2610  HB3 SER X 162     190.864 239.615 321.081  1.00  0.00           H
ATOM   2611  OG  SER X 162     190.471 239.808 319.114  1.00  0.00           O
ATOM   2612  HG  SER X 162     189.773 240.243 318.619  1.00  0.00           H
ATOM   2613  C   SER X 162     190.353 237.109 320.082  1.00  0.00           C
ATOM   2614  O   SER X 162     191.148 236.589 320.939  1.00  0.00           O
ATOM   2615  N   PRO X 163     190.218 236.561 318.853  1.00  0.00           N
ATOM   2616  CD  PRO X 163     189.274 237.064 317.808  1.00  0.00           C
ATOM   2617  HD2 PRO X 163     189.813 237.889 317.342  1.00  0.00           H
ATOM   2618  HD3 PRO X 163     188.338 237.424 318.234  1.00  0.00           H
ATOM   2619  CG  PRO X 163     188.975 235.872 316.949  1.00  0.00           C
ATOM   2620  HG2 PRO X 163     188.782 236.234 315.939  1.00  0.00           H
ATOM   2621  HG3 PRO X 163     188.123 235.267 317.260  1.00  0.00           H
ATOM   2622  CB  PRO X 163     190.208 234.963 317.073  1.00  0.00           C
ATOM   2623  HB2 PRO X 163     190.792 235.119 316.166  1.00  0.00           H
ATOM   2624  HB3 PRO X 163     189.985 233.906 317.215  1.00  0.00           H
ATOM   2625  CA  PRO X 163     190.989 235.463 318.315  1.00  0.00           C
ATOM   2626  HA  PRO X 163     190.775 234.715 319.078  1.00  0.00           H
ATOM   2627  C   PRO X 163     192.468 235.704 318.096  1.00  0.00           C
ATOM   2628  O   PRO X 163     192.862 236.829 317.745  1.00  0.00           O
ATOM   2629  N   CYS X 164     193.215 234.628 318.102  1.00  0.00           N
ATOM   2630  H   CYS X 164     192.721 233.755 317.979  1.00  0.00           H
ATOM   2631  CA  CYS X 164     194.681 234.675 317.948  1.00  0.00           C
ATOM   2632  HA  CYS X 164     194.894 235.447 317.209  1.00  0.00           H
ATOM   2633  CB  CYS X 164     195.245 234.972 319.311  1.00  0.00           C
ATOM   2634  HB2 CYS X 164     196.308 235.153 319.157  1.00  0.00           H
ATOM   2635  HB3 CYS X 164     194.843 235.880 319.760  1.00  0.00           H
ATOM   2636  SG  CYS X 164     194.893 233.601 320.422  1.00  0.00           S
ATOM   2637  HG  CYS X 164     193.583 233.436 320.222  1.00  0.00           H
ATOM   2638  C   CYS X 164     195.153 233.296 317.395  1.00  0.00           C
ATOM   2639  O   CYS X 164     194.757 232.218 317.764  1.00  0.00           O
ATOM   2640  N   ASP X 165     196.314 233.244 316.660  1.00  0.00           N
ATOM   2641  H   ASP X 165     196.605 234.150 316.321  1.00  0.00           H
ATOM   2642  CA  ASP X 165     197.272 232.075 316.561  1.00  0.00           C
ATOM   2643  HA  ASP X 165     196.863 231.106 316.276  1.00  0.00           H
ATOM   2644  CB  ASP X 165     198.191 232.373 315.355  1.00  0.00           C
ATOM   2645  HB2 ASP X 165     197.575 232.214 314.470  1.00  0.00           H
ATOM   2646  HB3 ASP X 165     198.500 233.410 315.492  1.00  0.00           H
ATOM   2647  CG  ASP X 165     199.370 231.391 315.263  1.00  0.00           C
ATOM   2648  OD1 ASP X 165     199.425 230.240 315.776  1.00  0.00           O
ATOM   2649  OD2 ASP X 165     200.460 231.798 314.752  1.00  0.00           O
ATOM   2650  C   ASP X 165     198.033 231.966 317.889  1.00  0.00           C
ATOM   2651  O   ASP X 165     198.574 232.953 318.278  1.00  0.00           O
ATOM   2652  N   PRO X 166     198.041 230.779 318.499  1.00  0.00           N
ATOM   2653  CD  PRO X 166     197.372 229.552 318.140  1.00  0.00           C
ATOM   2654  HD2 PRO X 166     197.922 229.127 317.300  1.00  0.00           H
ATOM   2655  HD3 PRO X 166     196.319 229.832 318.110  1.00  0.00           H
ATOM   2656  CG  PRO X 166     197.579 228.518 319.251  1.00  0.00           C
ATOM   2657  HG2 PRO X 166     198.296 227.754 318.950  1.00  0.00           H
ATOM   2658  HG3 PRO X 166     196.685 227.923 319.440  1.00  0.00           H
ATOM   2659  CB  PRO X 166     197.928 229.399 320.431  1.00  0.00           C
ATOM   2660  HB2 PRO X 166     198.407 228.849 321.242  1.00  0.00           H
ATOM   2661  HB3 PRO X 166     196.968 229.835 320.708  1.00  0.00           H
ATOM   2662  CA  PRO X 166     198.740 230.532 319.721  1.00  0.00           C
ATOM   2663  HA  PRO X 166     198.739 231.441 320.322  1.00  0.00           H
ATOM   2664  C   PRO X 166     200.144 230.102 319.505  1.00  0.00           C
ATOM   2665  O   PRO X 166     200.866 229.967 320.515  1.00  0.00           O
ATOM   2666  N   THR X 167     200.716 230.038 318.262  1.00  0.00           N
ATOM   2667  H   THR X 167     200.159 230.308 317.464  1.00  0.00           H
ATOM   2668  CA  THR X 167     202.011 229.489 317.989  1.00  0.00           C
ATOM   2669  HA  THR X 167     202.061 228.465 318.359  1.00  0.00           H
ATOM   2670  CB  THR X 167     202.266 229.404 316.409  1.00  0.00           C
ATOM   2671  HB  THR X 167     201.948 230.361 315.995  1.00  0.00           H
ATOM   2672  CG2 THR X 167     203.729 229.176 316.017  1.00  0.00           C
ATOM   2673 HG21 THR X 167     204.221 228.442 316.656  1.00  0.00           H
ATOM   2674 HG22 THR X 167     204.259 230.127 316.076  1.00  0.00           H
ATOM   2675 HG23 THR X 167     203.757 228.875 314.970  1.00  0.00           H
ATOM   2676  OG1 THR X 167     201.513 228.263 315.994  1.00  0.00           O
ATOM   2677  HG1 THR X 167     200.598 228.532 316.107  1.00  0.00           H
ATOM   2678  C   THR X 167     203.174 230.188 318.733  1.00  0.00           C
ATOM   2679  O   THR X 167     203.939 229.482 319.415  1.00  0.00           O
ATOM   2680  N   PHE X 168     203.306 231.502 318.625  1.00  0.00           N
ATOM   2681  H   PHE X 168     202.719 232.052 318.014  1.00  0.00           H
ATOM   2682  CA  PHE X 168     204.505 232.118 319.198  1.00  0.00           C
ATOM   2683  HA  PHE X 168     205.334 231.476 318.899  1.00  0.00           H
ATOM   2684  CB  PHE X 168     204.582 233.493 318.608  1.00  0.00           C
ATOM   2685  HB2 PHE X 168     204.341 233.392 317.550  1.00  0.00           H
ATOM   2686  HB3 PHE X 168     203.859 234.118 319.134  1.00  0.00           H
ATOM   2687  CG  PHE X 168     205.900 234.220 318.855  1.00  0.00           C
ATOM   2688  CD1 PHE X 168     206.041 235.013 319.998  1.00  0.00           C
ATOM   2689  HD1 PHE X 168     205.232 234.980 320.713  1.00  0.00           H
ATOM   2690  CE1 PHE X 168     207.192 235.673 320.378  1.00  0.00           C
ATOM   2691  HE1 PHE X 168     207.051 236.303 321.244  1.00  0.00           H
ATOM   2692  CZ  PHE X 168     208.279 235.582 319.488  1.00  0.00           C
ATOM   2693  HZ  PHE X 168     209.173 236.100 319.804  1.00  0.00           H
ATOM   2694  CE2 PHE X 168     208.166 234.929 318.297  1.00  0.00           C
ATOM   2695  HE2 PHE X 168     208.920 235.074 317.538  1.00  0.00           H
ATOM   2696  CD2 PHE X 168     206.943 234.291 317.924  1.00  0.00           C
ATOM   2697  HD2 PHE X 168     206.868 233.776 316.978  1.00  0.00           H
ATOM   2698  C   PHE X 168     204.335 232.202 320.765  1.00  0.00           C
ATOM   2699  O   PHE X 168     205.390 232.181 321.468  1.00  0.00           O
ATOM   2700  N   ILE X 169     203.132 232.361 321.327  1.00  0.00           N
ATOM   2701  H   ILE X 169     202.380 232.390 320.654  1.00  0.00           H
ATOM   2702  CA  ILE X 169     202.827 232.394 322.786  1.00  0.00           C
ATOM   2703  HA  ILE X 169     203.407 233.214 323.210  1.00  0.00           H
ATOM   2704  CB  ILE X 169     201.335 232.654 323.037  1.00  0.00           C
ATOM   2705  HB  ILE X 169     200.787 232.036 322.326  1.00  0.00           H
ATOM   2706  CG2 ILE X 169     200.999 232.416 324.515  1.00  0.00           C
ATOM   2707 HG21 ILE X 169     200.011 232.816 324.743  1.00  0.00           H
ATOM   2708 HG22 ILE X 169     201.724 232.901 325.168  1.00  0.00           H
ATOM   2709 HG23 ILE X 169     201.160 231.391 324.852  1.00  0.00           H
ATOM   2710  CG1 ILE X 169     200.998 234.069 322.696  1.00  0.00           C
ATOM   2711 HG12 ILE X 169     201.519 234.741 323.378  1.00  0.00           H
ATOM   2712 HG13 ILE X 169     201.208 234.286 321.649  1.00  0.00           H
ATOM   2713  CD1 ILE X 169     199.510 234.431 322.724  1.00  0.00           C
ATOM   2714 HD11 ILE X 169     199.416 235.395 322.224  1.00  0.00           H
ATOM   2715 HD12 ILE X 169     198.925 233.667 322.212  1.00  0.00           H
ATOM   2716 HD13 ILE X 169     199.159 234.599 323.742  1.00  0.00           H
ATOM   2717  C   ILE X 169     203.372 231.108 323.379  1.00  0.00           C
ATOM   2718  O   ILE X 169     204.216 231.076 324.311  1.00  0.00           O
ATOM   2719  N   LEU X 170     202.995 230.022 322.717  1.00  0.00           N
ATOM   2720  H   LEU X 170     202.392 230.230 321.934  1.00  0.00           H
ATOM   2721  CA  LEU X 170     203.384 228.611 322.941  1.00  0.00           C
ATOM   2722  HA  LEU X 170     203.383 228.486 324.024  1.00  0.00           H
ATOM   2723  CB  LEU X 170     202.258 227.615 322.466  1.00  0.00           C
ATOM   2724  HB2 LEU X 170     202.385 227.362 321.413  1.00  0.00           H
ATOM   2725  HB3 LEU X 170     202.569 226.669 322.908  1.00  0.00           H
ATOM   2726  CG  LEU X 170     200.802 227.904 322.841  1.00  0.00           C
ATOM   2727  HG  LEU X 170     200.360 228.771 322.351  1.00  0.00           H
ATOM   2728  CD1 LEU X 170     200.044 226.656 322.486  1.00  0.00           C
ATOM   2729 HD11 LEU X 170     199.090 226.582 323.009  1.00  0.00           H
ATOM   2730 HD12 LEU X 170     199.848 226.671 321.414  1.00  0.00           H
ATOM   2731 HD13 LEU X 170     200.659 225.782 322.699  1.00  0.00           H
ATOM   2732  CD2 LEU X 170     200.711 227.980 324.360  1.00  0.00           C
ATOM   2733 HD21 LEU X 170     201.343 227.178 324.742  1.00  0.00           H
ATOM   2734 HD22 LEU X 170     201.293 228.815 324.750  1.00  0.00           H
ATOM   2735 HD23 LEU X 170     199.637 227.921 324.536  1.00  0.00           H
ATOM   2736  C   LEU X 170     204.771 228.269 322.357  1.00  0.00           C
ATOM   2737  O   LEU X 170     205.070 227.090 322.175  1.00  0.00           O
ATOM   2738  N   GLY X 171     205.633 229.285 322.014  1.00  0.00           N
ATOM   2739  H   GLY X 171     205.205 230.197 321.939  1.00  0.00           H
ATOM   2740  CA  GLY X 171     207.099 229.225 321.791  1.00  0.00           C
ATOM   2741  HA2 GLY X 171     207.511 228.228 321.641  1.00  0.00           H
ATOM   2742  HA3 GLY X 171     207.359 229.756 320.875  1.00  0.00           H
ATOM   2743  C   GLY X 171     207.786 229.987 322.953  1.00  0.00           C
ATOM   2744  O   GLY X 171     208.827 229.637 323.441  1.00  0.00           O
ATOM   2745  N   CYS X 172     207.142 231.055 323.394  1.00  0.00           N
ATOM   2746  H   CYS X 172     206.286 231.301 322.919  1.00  0.00           H
ATOM   2747  CA  CYS X 172     207.620 231.922 324.466  1.00  0.00           C
ATOM   2748  HA  CYS X 172     208.615 232.187 324.107  1.00  0.00           H
ATOM   2749  CB  CYS X 172     206.663 233.115 324.814  1.00  0.00           C
ATOM   2750  HB2 CYS X 172     205.638 232.853 325.076  1.00  0.00           H
ATOM   2751  HB3 CYS X 172     207.000 233.734 325.646  1.00  0.00           H
ATOM   2752  SG  CYS X 172     206.605 234.297 323.407  1.00  0.00           S
ATOM   2753  HG  CYS X 172     205.887 233.542 322.571  1.00  0.00           H
ATOM   2754  C   CYS X 172     207.724 231.112 325.823  1.00  0.00           C
ATOM   2755  O   CYS X 172     208.843 231.021 326.398  1.00  0.00           O
ATOM   2756  N   ALA X 173     206.620 230.468 326.277  1.00  0.00           N
ATOM   2757  H   ALA X 173     205.774 230.708 325.779  1.00  0.00           H
ATOM   2758  CA  ALA X 173     206.629 229.811 327.600  1.00  0.00           C
ATOM   2759  HA  ALA X 173     206.901 230.567 328.337  1.00  0.00           H
ATOM   2760  CB  ALA X 173     205.160 229.369 327.889  1.00  0.00           C
ATOM   2761  HB1 ALA X 173     204.707 228.846 327.046  1.00  0.00           H
ATOM   2762  HB2 ALA X 173     204.507 230.225 328.065  1.00  0.00           H
ATOM   2763  HB3 ALA X 173     205.286 228.796 328.807  1.00  0.00           H
ATOM   2764  C   ALA X 173     207.666 228.710 327.800  1.00  0.00           C
ATOM   2765  O   ALA X 173     208.493 228.815 328.642  1.00  0.00           O
ATOM   2766  N   PRO X 174     207.688 227.643 326.895  1.00  0.00           N
ATOM   2767  CD  PRO X 174     206.715 227.317 325.846  1.00  0.00           C
ATOM   2768  HD2 PRO X 174     206.505 228.146 325.169  1.00  0.00           H
ATOM   2769  HD3 PRO X 174     205.767 226.919 326.208  1.00  0.00           H
ATOM   2770  CG  PRO X 174     207.344 226.211 325.003  1.00  0.00           C
ATOM   2771  HG2 PRO X 174     208.018 226.495 324.194  1.00  0.00           H
ATOM   2772  HG3 PRO X 174     206.547 225.591 324.592  1.00  0.00           H
ATOM   2773  CB  PRO X 174     208.293 225.500 325.982  1.00  0.00           C
ATOM   2774  HB2 PRO X 174     209.203 225.068 325.568  1.00  0.00           H
ATOM   2775  HB3 PRO X 174     207.737 224.780 326.582  1.00  0.00           H
ATOM   2776  CA  PRO X 174     208.758 226.577 326.935  1.00  0.00           C
ATOM   2777  HA  PRO X 174     208.759 226.133 327.930  1.00  0.00           H
ATOM   2778  C   PRO X 174     210.143 227.077 326.639  1.00  0.00           C
ATOM   2779  O   PRO X 174     211.161 226.493 327.109  1.00  0.00           O
ATOM   2780  N   CYS X 175     210.278 228.197 325.890  1.00  0.00           N
ATOM   2781  H   CYS X 175     209.468 228.579 325.422  1.00  0.00           H
ATOM   2782  CA  CYS X 175     211.586 228.789 325.792  1.00  0.00           C
ATOM   2783  HA  CYS X 175     212.289 228.099 325.324  1.00  0.00           H
ATOM   2784  CB  CYS X 175     211.626 229.971 324.881  1.00  0.00           C
ATOM   2785  HB2 CYS X 175     211.061 229.711 323.985  1.00  0.00           H
ATOM   2786  HB3 CYS X 175     211.108 230.742 325.450  1.00  0.00           H
ATOM   2787  SG  CYS X 175     213.299 230.570 324.534  1.00  0.00           S
ATOM   2788  HG  CYS X 175     213.623 229.634 323.637  1.00  0.00           H
ATOM   2789  C   CYS X 175     212.138 229.262 327.183  1.00  0.00           C
ATOM   2790  O   CYS X 175     213.258 228.925 327.570  1.00  0.00           O
ATOM   2791  N   ASN X 176     211.356 229.961 327.979  1.00  0.00           N
ATOM   2792  H   ASN X 176     210.490 230.341 327.622  1.00  0.00           H
ATOM   2793  CA  ASN X 176     211.614 230.302 329.378  1.00  0.00           C
ATOM   2794  HA  ASN X 176     212.638 230.674 329.404  1.00  0.00           H
ATOM   2795  CB  ASN X 176     210.708 231.526 329.748  1.00  0.00           C
ATOM   2796  HB2 ASN X 176     209.663 231.354 329.492  1.00  0.00           H
ATOM   2797  HB3 ASN X 176     210.783 231.903 330.768  1.00  0.00           H
ATOM   2798  CG  ASN X 176     211.209 232.693 328.921  1.00  0.00           C
ATOM   2799  OD1 ASN X 176     212.150 233.330 329.310  1.00  0.00           O
ATOM   2800  ND2 ASN X 176     210.547 233.007 327.777  1.00  0.00           N
ATOM   2801 HD21 ASN X 176     210.916 233.774 327.234  1.00  0.00           H
ATOM   2802 HD22 ASN X 176     209.701 232.579 327.429  1.00  0.00           H
ATOM   2803  C   ASN X 176     211.551 229.278 330.492  1.00  0.00           C
ATOM   2804  O   ASN X 176     212.376 229.341 331.380  1.00  0.00           O
ATOM   2805  N   VAL X 177     210.689 228.240 330.386  1.00  0.00           N
ATOM   2806  H   VAL X 177     210.102 228.234 329.564  1.00  0.00           H
ATOM   2807  CA  VAL X 177     210.750 227.025 331.211  1.00  0.00           C
ATOM   2808  HA  VAL X 177     210.499 227.303 332.235  1.00  0.00           H
ATOM   2809  CB  VAL X 177     209.738 225.956 330.649  1.00  0.00           C
ATOM   2810  HB  VAL X 177     209.728 226.181 329.582  1.00  0.00           H
ATOM   2811  CG1 VAL X 177     209.957 224.520 330.894  1.00  0.00           C
ATOM   2812 HG11 VAL X 177     209.153 223.866 330.555  1.00  0.00           H
ATOM   2813 HG12 VAL X 177     210.817 224.063 330.405  1.00  0.00           H
ATOM   2814 HG13 VAL X 177     210.096 224.406 331.969  1.00  0.00           H
ATOM   2815  CG2 VAL X 177     208.264 226.123 331.154  1.00  0.00           C
ATOM   2816 HG21 VAL X 177     208.305 225.999 332.236  1.00  0.00           H
ATOM   2817 HG22 VAL X 177     207.536 225.456 330.693  1.00  0.00           H
ATOM   2818 HG23 VAL X 177     207.962 227.159 331.001  1.00  0.00           H
ATOM   2819  C   VAL X 177     212.124 226.309 331.149  1.00  0.00           C
ATOM   2820  O   VAL X 177     212.721 226.112 332.171  1.00  0.00           O
ATOM   2821  N   ILE X 178     212.667 226.145 329.910  1.00  0.00           N
ATOM   2822  H   ILE X 178     212.081 226.284 329.099  1.00  0.00           H
ATOM   2823  CA  ILE X 178     213.927 225.415 329.672  1.00  0.00           C
ATOM   2824  HA  ILE X 178     214.022 224.561 330.343  1.00  0.00           H
ATOM   2825  CB  ILE X 178     213.924 224.867 328.208  1.00  0.00           C
ATOM   2826  HB  ILE X 178     213.580 225.704 327.599  1.00  0.00           H
ATOM   2827  CG2 ILE X 178     215.395 224.283 327.903  1.00  0.00           C
ATOM   2828 HG21 ILE X 178     215.776 223.595 328.658  1.00  0.00           H
ATOM   2829 HG22 ILE X 178     216.013 225.180 327.933  1.00  0.00           H
ATOM   2830 HG23 ILE X 178     215.434 223.766 326.945  1.00  0.00           H
ATOM   2831  CG1 ILE X 178     212.840 223.829 327.895  1.00  0.00           C
ATOM   2832 HG12 ILE X 178     211.890 224.322 328.103  1.00  0.00           H
ATOM   2833 HG13 ILE X 178     212.840 223.554 326.841  1.00  0.00           H
ATOM   2834  CD1 ILE X 178     212.956 222.506 328.733  1.00  0.00           C
ATOM   2835 HD11 ILE X 178     213.858 222.027 328.353  1.00  0.00           H
ATOM   2836 HD12 ILE X 178     213.019 222.707 329.803  1.00  0.00           H
ATOM   2837 HD13 ILE X 178     212.051 221.900 328.685  1.00  0.00           H
ATOM   2838  C   ILE X 178     215.157 226.417 329.905  1.00  0.00           C
ATOM   2839  O   ILE X 178     216.254 226.060 330.365  1.00  0.00           O
ATOM   2840  N   CYS X 179     215.085 227.679 329.462  1.00  0.00           N
ATOM   2841  H   CYS X 179     214.190 227.892 329.046  1.00  0.00           H
ATOM   2842  CA  CYS X 179     216.011 228.798 329.682  1.00  0.00           C
ATOM   2843  HA  CYS X 179     217.009 228.451 329.413  1.00  0.00           H
ATOM   2844  CB  CYS X 179     215.696 230.047 328.833  1.00  0.00           C
ATOM   2845  HB2 CYS X 179     215.551 229.946 327.757  1.00  0.00           H
ATOM   2846  HB3 CYS X 179     214.764 230.424 329.256  1.00  0.00           H
ATOM   2847  SG  CYS X 179     216.824 231.388 329.013  1.00  0.00           S
ATOM   2848  HG  CYS X 179     216.429 231.739 330.240  1.00  0.00           H
ATOM   2849  C   CYS X 179     216.270 229.096 331.165  1.00  0.00           C
ATOM   2850  O   CYS X 179     217.450 229.252 331.614  1.00  0.00           O
ATOM   2851  N   SER X 180     215.238 229.225 331.991  1.00  0.00           N
ATOM   2852  H   SER X 180     214.349 229.263 331.513  1.00  0.00           H
ATOM   2853  CA  SER X 180     215.222 229.301 333.460  1.00  0.00           C
ATOM   2854  HA  SER X 180     215.741 230.215 333.751  1.00  0.00           H
ATOM   2855  CB  SER X 180     213.763 229.505 333.974  1.00  0.00           C
ATOM   2856  HB2 SER X 180     213.321 230.352 333.449  1.00  0.00           H
ATOM   2857  HB3 SER X 180     213.204 228.608 333.709  1.00  0.00           H
ATOM   2858  OG  SER X 180     213.669 229.806 335.330  1.00  0.00           O
ATOM   2859  HG  SER X 180     212.743 230.055 335.385  1.00  0.00           H
ATOM   2860  C   SER X 180     216.017 228.110 334.060  1.00  0.00           C
ATOM   2861  O   SER X 180     216.523 228.186 335.181  1.00  0.00           O
ATOM   2862  N   ILE X 181     216.133 226.979 333.368  1.00  0.00           N
ATOM   2863  H   ILE X 181     215.835 226.900 332.406  1.00  0.00           H
ATOM   2864  CA  ILE X 181     217.046 225.812 333.770  1.00  0.00           C
ATOM   2865  HA  ILE X 181     217.192 225.866 334.849  1.00  0.00           H
ATOM   2866  CB  ILE X 181     216.344 224.491 333.408  1.00  0.00           C
ATOM   2867  HB  ILE X 181     216.238 224.285 332.343  1.00  0.00           H
ATOM   2868  CG2 ILE X 181     217.211 223.311 333.909  1.00  0.00           C
ATOM   2869 HG21 ILE X 181     218.258 223.381 333.613  1.00  0.00           H
ATOM   2870 HG22 ILE X 181     216.790 222.335 333.668  1.00  0.00           H
ATOM   2871 HG23 ILE X 181     217.337 223.390 334.988  1.00  0.00           H
ATOM   2872  CG1 ILE X 181     214.942 224.278 334.016  1.00  0.00           C
ATOM   2873 HG12 ILE X 181     215.063 224.150 335.091  1.00  0.00           H
ATOM   2874 HG13 ILE X 181     214.361 225.198 333.954  1.00  0.00           H
ATOM   2875  CD1 ILE X 181     214.067 223.227 333.314  1.00  0.00           C
ATOM   2876 HD11 ILE X 181     213.876 223.586 332.303  1.00  0.00           H
ATOM   2877 HD12 ILE X 181     214.567 222.258 333.283  1.00  0.00           H
ATOM   2878 HD13 ILE X 181     213.104 223.187 333.822  1.00  0.00           H
ATOM   2879  C   ILE X 181     218.465 225.894 333.211  1.00  0.00           C
ATOM   2880  O   ILE X 181     219.412 225.686 333.930  1.00  0.00           O
ATOM   2881  N   ILE X 182     218.530 225.997 331.865  1.00  0.00           N
ATOM   2882  H   ILE X 182     217.702 225.801 331.322  1.00  0.00           H
ATOM   2883  CA  ILE X 182     219.847 225.935 331.218  1.00  0.00           C
ATOM   2884  HA  ILE X 182     220.315 225.028 331.602  1.00  0.00           H
ATOM   2885  CB  ILE X 182     219.720 225.805 329.665  1.00  0.00           C
ATOM   2886  HB  ILE X 182     219.273 226.679 329.190  1.00  0.00           H
ATOM   2887  CG2 ILE X 182     221.101 225.743 329.063  1.00  0.00           C
ATOM   2888 HG21 ILE X 182     221.608 224.875 329.484  1.00  0.00           H
ATOM   2889 HG22 ILE X 182     221.637 226.686 329.167  1.00  0.00           H
ATOM   2890 HG23 ILE X 182     221.025 225.637 327.981  1.00  0.00           H
ATOM   2891  CG1 ILE X 182     218.968 224.475 329.333  1.00  0.00           C
ATOM   2892 HG12 ILE X 182     219.519 223.633 329.752  1.00  0.00           H
ATOM   2893 HG13 ILE X 182     217.926 224.506 329.650  1.00  0.00           H
ATOM   2894  CD1 ILE X 182     218.764 224.279 327.797  1.00  0.00           C
ATOM   2895 HD11 ILE X 182     219.703 224.007 327.315  1.00  0.00           H
ATOM   2896 HD12 ILE X 182     218.031 223.506 327.563  1.00  0.00           H
ATOM   2897 HD13 ILE X 182     218.333 225.201 327.406  1.00  0.00           H
ATOM   2898  C   ILE X 182     220.785 227.160 331.645  1.00  0.00           C
ATOM   2899  O   ILE X 182     221.944 226.788 331.765  1.00  0.00           O
ATOM   2900  N   PHE X 183     220.316 228.406 331.833  1.00  0.00           N
ATOM   2901  H   PHE X 183     219.342 228.503 331.584  1.00  0.00           H
ATOM   2902  CA  PHE X 183     221.073 229.645 332.211  1.00  0.00           C
ATOM   2903  HA  PHE X 183     222.031 229.199 332.478  1.00  0.00           H
ATOM   2904  CB  PHE X 183     221.269 230.541 330.950  1.00  0.00           C
ATOM   2905  HB2 PHE X 183     220.445 231.253 330.993  1.00  0.00           H
ATOM   2906  HB3 PHE X 183     222.258 230.993 331.027  1.00  0.00           H
ATOM   2907  CG  PHE X 183     221.155 229.861 329.575  1.00  0.00           C
ATOM   2908  CD1 PHE X 183     222.339 229.702 328.792  1.00  0.00           C
ATOM   2909  HD1 PHE X 183     223.309 230.062 329.099  1.00  0.00           H
ATOM   2910  CE1 PHE X 183     222.176 228.921 327.627  1.00  0.00           C
ATOM   2911  HE1 PHE X 183     223.034 228.524 327.104  1.00  0.00           H
ATOM   2912  CZ  PHE X 183     220.913 228.513 327.152  1.00  0.00           C
ATOM   2913  HZ  PHE X 183     220.968 227.964 326.223  1.00  0.00           H
ATOM   2914  CE2 PHE X 183     219.757 228.898 327.838  1.00  0.00           C
ATOM   2915  HE2 PHE X 183     218.764 228.611 327.525  1.00  0.00           H
ATOM   2916  CD2 PHE X 183     219.848 229.543 329.082  1.00  0.00           C
ATOM   2917  HD2 PHE X 183     218.919 229.750 329.594  1.00  0.00           H
ATOM   2918  C   PHE X 183     220.561 230.500 333.362  1.00  0.00           C
ATOM   2919  O   PHE X 183     221.032 231.687 333.476  1.00  0.00           O
ATOM   2920  N   HIE X 184     219.626 229.959 334.161  1.00  0.00           N
ATOM   2921  H   HIE X 184     219.472 228.994 333.908  1.00  0.00           H
ATOM   2922  CA  HIE X 184     218.910 230.575 335.273  1.00  0.00           C
ATOM   2923  HA  HIE X 184     218.237 229.780 335.595  1.00  0.00           H
ATOM   2924  CB  HIE X 184     219.905 230.818 336.392  1.00  0.00           C
ATOM   2925  HB2 HIE X 184     220.371 229.872 336.668  1.00  0.00           H
ATOM   2926  HB3 HIE X 184     220.734 231.406 335.997  1.00  0.00           H
ATOM   2927  CG  HIE X 184     219.479 231.541 337.617  1.00  0.00           C
ATOM   2928  ND1 HIE X 184     219.415 232.957 337.670  1.00  0.00           N
ATOM   2929  CE1 HIE X 184     218.730 233.247 338.781  1.00  0.00           C
ATOM   2930  HE1 HIE X 184     218.448 234.261 339.023  1.00  0.00           H
ATOM   2931  NE2 HIE X 184     218.414 232.127 339.454  1.00  0.00           N
ATOM   2932  HE2 HIE X 184     218.056 232.104 340.398  1.00  0.00           H
ATOM   2933  CD2 HIE X 184     218.928 231.053 338.754  1.00  0.00           C
ATOM   2934  HD2 HIE X 184     218.780 230.014 339.010  1.00  0.00           H
ATOM   2935  C   HIE X 184     218.011 231.838 334.964  1.00  0.00           C
ATOM   2936  O   HIE X 184     216.985 232.055 335.647  1.00  0.00           O
ATOM   2937  N   LYS X 185     218.410 232.663 333.974  1.00  0.00           N
ATOM   2938  H   LYS X 185     219.220 232.270 333.516  1.00  0.00           H
ATOM   2939  CA  LYS X 185     217.681 233.812 333.377  1.00  0.00           C
ATOM   2940  HA  LYS X 185     217.339 234.369 334.250  1.00  0.00           H
ATOM   2941  CB  LYS X 185     218.613 234.739 332.493  1.00  0.00           C
ATOM   2942  HB2 LYS X 185     218.135 235.716 332.435  1.00  0.00           H
ATOM   2943  HB3 LYS X 185     219.505 234.890 333.102  1.00  0.00           H
ATOM   2944  CG  LYS X 185     218.907 234.238 331.008  1.00  0.00           C
ATOM   2945  HG2 LYS X 185     219.058 233.159 331.040  1.00  0.00           H
ATOM   2946  HG3 LYS X 185     217.940 234.355 330.520  1.00  0.00           H
ATOM   2947  CD  LYS X 185     220.022 234.941 330.225  1.00  0.00           C
ATOM   2948  HD2 LYS X 185     220.058 234.388 329.287  1.00  0.00           H
ATOM   2949  HD3 LYS X 185     219.802 236.004 330.125  1.00  0.00           H
ATOM   2950  CE  LYS X 185     221.379 234.889 330.900  1.00  0.00           C
ATOM   2951  HE2 LYS X 185     221.152 235.157 331.931  1.00  0.00           H
ATOM   2952  HE3 LYS X 185     221.732 233.858 330.911  1.00  0.00           H
ATOM   2953  NZ  LYS X 185     222.402 235.788 330.193  1.00  0.00           N
ATOM   2954  HZ1 LYS X 185     222.100 236.750 330.151  1.00  0.00           H
ATOM   2955  HZ2 LYS X 185     222.538 235.470 329.244  1.00  0.00           H
ATOM   2956  HZ3 LYS X 185     223.310 235.767 330.634  1.00  0.00           H
ATOM   2957  C   LYS X 185     216.387 233.393 332.721  1.00  0.00           C
ATOM   2958  O   LYS X 185     216.242 232.244 332.307  1.00  0.00           O
ATOM   2959  N   ARG X 186     215.459 234.338 332.597  1.00  0.00           N
ATOM   2960  H   ARG X 186     215.663 235.109 333.217  1.00  0.00           H
ATOM   2961  CA  ARG X 186     214.090 234.307 331.928  1.00  0.00           C
ATOM   2962  HA  ARG X 186     214.207 233.700 331.030  1.00  0.00           H
ATOM   2963  CB  ARG X 186     213.055 233.751 332.889  1.00  0.00           C
ATOM   2964  HB2 ARG X 186     212.174 233.491 332.302  1.00  0.00           H
ATOM   2965  HB3 ARG X 186     213.430 232.882 333.429  1.00  0.00           H
ATOM   2966  CG  ARG X 186     212.727 234.651 334.072  1.00  0.00           C
ATOM   2967  HG2 ARG X 186     213.614 234.839 334.676  1.00  0.00           H
ATOM   2968  HG3 ARG X 186     212.351 235.560 333.604  1.00  0.00           H
ATOM   2969  CD  ARG X 186     211.611 234.183 334.978  1.00  0.00           C
ATOM   2970  HD2 ARG X 186     211.963 233.245 335.406  1.00  0.00           H
ATOM   2971  HD3 ARG X 186     211.517 234.787 335.880  1.00  0.00           H
ATOM   2972  NE  ARG X 186     210.358 233.897 334.294  1.00  0.00           N
ATOM   2973  HE  ARG X 186     210.270 232.961 333.925  1.00  0.00           H
ATOM   2974  CZ  ARG X 186     209.438 234.746 333.994  1.00  0.00           C
ATOM   2975  NH1 ARG X 186     209.419 235.969 334.422  1.00  0.00           N
ATOM   2976 HH11 ARG X 186     210.272 236.363 334.791  1.00  0.00           H
ATOM   2977 HH12 ARG X 186     208.769 236.572 333.938  1.00  0.00           H
ATOM   2978  NH2 ARG X 186     208.411 234.387 333.233  1.00  0.00           N
ATOM   2979 HH21 ARG X 186     208.445 233.409 332.981  1.00  0.00           H
ATOM   2980 HH22 ARG X 186     207.897 235.137 332.794  1.00  0.00           H
ATOM   2981  C   ARG X 186     213.797 235.718 331.489  1.00  0.00           C
ATOM   2982  O   ARG X 186     214.468 236.671 331.793  1.00  0.00           O
ATOM   2983  N   PHE X 187     212.923 235.768 330.552  1.00  0.00           N
ATOM   2984  H   PHE X 187     212.450 234.916 330.288  1.00  0.00           H
ATOM   2985  CA  PHE X 187     212.684 236.998 329.805  1.00  0.00           C
ATOM   2986  HA  PHE X 187     213.218 237.851 330.223  1.00  0.00           H
ATOM   2987  CB  PHE X 187     213.108 236.827 328.300  1.00  0.00           C
ATOM   2988  HB2 PHE X 187     212.648 235.934 327.876  1.00  0.00           H
ATOM   2989  HB3 PHE X 187     212.965 237.715 327.684  1.00  0.00           H
ATOM   2990  CG  PHE X 187     214.553 236.469 328.140  1.00  0.00           C
ATOM   2991  CD1 PHE X 187     214.918 235.114 327.979  1.00  0.00           C
ATOM   2992  HD1 PHE X 187     214.166 234.343 327.901  1.00  0.00           H
ATOM   2993  CE1 PHE X 187     216.217 234.771 327.731  1.00  0.00           C
ATOM   2994  HE1 PHE X 187     216.373 233.759 327.387  1.00  0.00           H
ATOM   2995  CZ  PHE X 187     217.197 235.793 327.756  1.00  0.00           C
ATOM   2996  HZ  PHE X 187     218.243 235.569 327.603  1.00  0.00           H
ATOM   2997  CE2 PHE X 187     216.911 237.085 328.224  1.00  0.00           C
ATOM   2998  HE2 PHE X 187     217.668 237.847 328.331  1.00  0.00           H
ATOM   2999  CD2 PHE X 187     215.511 237.423 328.301  1.00  0.00           C
ATOM   3000  HD2 PHE X 187     215.273 238.470 328.420  1.00  0.00           H
ATOM   3001  C   PHE X 187     211.190 237.403 329.987  1.00  0.00           C
ATOM   3002  O   PHE X 187     210.292 236.621 330.242  1.00  0.00           O
ATOM   3003  N   ASP X 188     210.928 238.707 329.722  1.00  0.00           N
ATOM   3004  H   ASP X 188     211.733 239.209 329.374  1.00  0.00           H
ATOM   3005  CA  ASP X 188     209.655 239.382 329.404  1.00  0.00           C
ATOM   3006  HA  ASP X 188     208.860 239.037 330.065  1.00  0.00           H
ATOM   3007  CB  ASP X 188     209.903 240.915 329.552  1.00  0.00           C
ATOM   3008  HB2 ASP X 188     210.128 241.125 330.598  1.00  0.00           H
ATOM   3009  HB3 ASP X 188     210.671 241.247 328.854  1.00  0.00           H
ATOM   3010  CG  ASP X 188     208.608 241.721 329.394  1.00  0.00           C
ATOM   3011  OD1 ASP X 188     208.629 242.954 329.321  1.00  0.00           O
ATOM   3012  OD2 ASP X 188     207.506 241.125 329.287  1.00  0.00           O
ATOM   3013  C   ASP X 188     209.267 238.993 327.922  1.00  0.00           C
ATOM   3014  O   ASP X 188     210.056 239.282 326.992  1.00  0.00           O
ATOM   3015  N   TYR X 189     208.048 238.483 327.777  1.00  0.00           N
ATOM   3016  H   TYR X 189     207.509 238.418 328.629  1.00  0.00           H
ATOM   3017  CA  TYR X 189     207.463 238.017 326.534  1.00  0.00           C
ATOM   3018  HA  TYR X 189     208.183 237.339 326.075  1.00  0.00           H
ATOM   3019  CB  TYR X 189     206.171 237.281 326.948  1.00  0.00           C
ATOM   3020  HB2 TYR X 189     205.463 237.925 327.469  1.00  0.00           H
ATOM   3021  HB3 TYR X 189     205.781 236.824 326.038  1.00  0.00           H
ATOM   3022  CG  TYR X 189     206.268 236.066 327.805  1.00  0.00           C
ATOM   3023  CD1 TYR X 189     207.519 235.496 328.333  1.00  0.00           C
ATOM   3024  HD1 TYR X 189     208.438 236.039 328.169  1.00  0.00           H
ATOM   3025  CE1 TYR X 189     207.503 234.330 329.121  1.00  0.00           C
ATOM   3026  HE1 TYR X 189     208.443 234.031 329.560  1.00  0.00           H
ATOM   3027  CZ  TYR X 189     206.278 233.609 329.396  1.00  0.00           C
ATOM   3028  OH  TYR X 189     206.283 232.438 330.118  1.00  0.00           O
ATOM   3029  HH  TYR X 189     207.111 232.277 330.577  1.00  0.00           H
ATOM   3030  CE2 TYR X 189     205.086 234.157 328.811  1.00  0.00           C
ATOM   3031  HE2 TYR X 189     204.147 233.649 328.973  1.00  0.00           H
ATOM   3032  CD2 TYR X 189     205.149 235.382 328.088  1.00  0.00           C
ATOM   3033  HD2 TYR X 189     204.190 235.650 327.670  1.00  0.00           H
ATOM   3034  C   TYR X 189     207.265 239.065 325.405  1.00  0.00           C
ATOM   3035  O   TYR X 189     206.762 238.722 324.344  1.00  0.00           O
ATOM   3036  N   LYS X 190     207.743 240.308 325.611  1.00  0.00           N
ATOM   3037  H   LYS X 190     208.212 240.468 326.491  1.00  0.00           H
ATOM   3038  CA  LYS X 190     207.770 241.439 324.668  1.00  0.00           C
ATOM   3039  HA  LYS X 190     207.578 240.971 323.703  1.00  0.00           H
ATOM   3040  CB  LYS X 190     206.556 242.382 324.947  1.00  0.00           C
ATOM   3041  HB2 LYS X 190     206.643 243.278 324.332  1.00  0.00           H
ATOM   3042  HB3 LYS X 190     205.572 242.034 324.633  1.00  0.00           H
ATOM   3043  CG  LYS X 190     206.517 242.914 326.386  1.00  0.00           C
ATOM   3044  HG2 LYS X 190     206.391 242.030 327.011  1.00  0.00           H
ATOM   3045  HG3 LYS X 190     207.494 243.351 326.594  1.00  0.00           H
ATOM   3046  CD  LYS X 190     205.475 244.047 326.626  1.00  0.00           C
ATOM   3047  HD2 LYS X 190     205.857 245.018 326.309  1.00  0.00           H
ATOM   3048  HD3 LYS X 190     204.633 243.723 326.014  1.00  0.00           H
ATOM   3049  CE  LYS X 190     205.143 244.069 328.153  1.00  0.00           C
ATOM   3050  HE2 LYS X 190     204.406 244.858 328.306  1.00  0.00           H
ATOM   3051  HE3 LYS X 190     204.738 243.084 328.387  1.00  0.00           H
ATOM   3052  NZ  LYS X 190     206.403 244.373 328.931  1.00  0.00           N
ATOM   3053  HZ1 LYS X 190     206.829 245.240 328.636  1.00  0.00           H
ATOM   3054  HZ2 LYS X 190     207.178 243.737 328.810  1.00  0.00           H
ATOM   3055  HZ3 LYS X 190     206.315 244.231 329.927  1.00  0.00           H
ATOM   3056  C   LYS X 190     209.055 242.289 324.483  1.00  0.00           C
ATOM   3057  O   LYS X 190     208.975 243.281 323.749  1.00  0.00           O
ATOM   3058  N   ASP X 191     210.177 241.893 325.080  1.00  0.00           N
ATOM   3059  H   ASP X 191     210.255 241.022 325.586  1.00  0.00           H
ATOM   3060  CA  ASP X 191     211.427 242.655 325.171  1.00  0.00           C
ATOM   3061  HA  ASP X 191     211.264 243.731 325.121  1.00  0.00           H
ATOM   3062  CB  ASP X 191     212.069 242.540 326.569  1.00  0.00           C
ATOM   3063  HB2 ASP X 191     211.338 242.723 327.356  1.00  0.00           H
ATOM   3064  HB3 ASP X 191     212.542 241.570 326.719  1.00  0.00           H
ATOM   3065  CG  ASP X 191     213.149 243.616 326.763  1.00  0.00           C
ATOM   3066  OD1 ASP X 191     213.571 244.338 325.810  1.00  0.00           O
ATOM   3067  OD2 ASP X 191     213.606 243.742 327.918  1.00  0.00           O
ATOM   3068  C   ASP X 191     212.339 242.320 323.979  1.00  0.00           C
ATOM   3069  O   ASP X 191     212.358 241.216 323.498  1.00  0.00           O
ATOM   3070  N   GLN X 192     212.884 243.316 323.342  1.00  0.00           N
ATOM   3071  H   GLN X 192     212.899 244.178 323.868  1.00  0.00           H
ATOM   3072  CA  GLN X 192     213.648 243.205 322.126  1.00  0.00           C
ATOM   3073  HA  GLN X 192     213.033 242.919 321.273  1.00  0.00           H
ATOM   3074  CB  GLN X 192     214.247 244.530 321.619  1.00  0.00           C
ATOM   3075  HB2 GLN X 192     214.082 245.354 322.314  1.00  0.00           H
ATOM   3076  HB3 GLN X 192     215.335 244.476 321.633  1.00  0.00           H
ATOM   3077  CG  GLN X 192     213.911 244.989 320.185  1.00  0.00           C
ATOM   3078  HG2 GLN X 192     214.148 246.051 320.260  1.00  0.00           H
ATOM   3079  HG3 GLN X 192     214.544 244.546 319.417  1.00  0.00           H
ATOM   3080  CD  GLN X 192     212.406 244.778 319.786  1.00  0.00           C
ATOM   3081  OE1 GLN X 192     211.434 244.941 320.508  1.00  0.00           O
ATOM   3082  NE2 GLN X 192     212.260 244.302 318.578  1.00  0.00           N
ATOM   3083 HE21 GLN X 192     211.378 244.042 318.160  1.00  0.00           H
ATOM   3084 HE22 GLN X 192     213.134 244.300 318.072  1.00  0.00           H
ATOM   3085  C   GLN X 192     214.699 242.188 322.166  1.00  0.00           C
ATOM   3086  O   GLN X 192     214.786 241.475 321.191  1.00  0.00           O
ATOM   3087  N   GLN X 193     215.552 242.145 323.223  1.00  0.00           N
ATOM   3088  H   GLN X 193     215.286 242.670 324.044  1.00  0.00           H
ATOM   3089  CA  GLN X 193     216.629 241.042 323.330  1.00  0.00           C
ATOM   3090  HA  GLN X 193     217.328 241.060 322.494  1.00  0.00           H
ATOM   3091  CB  GLN X 193     217.462 241.212 324.566  1.00  0.00           C
ATOM   3092  HB2 GLN X 193     218.457 240.820 324.357  1.00  0.00           H
ATOM   3093  HB3 GLN X 193     217.667 242.257 324.798  1.00  0.00           H
ATOM   3094  CG  GLN X 193     217.003 240.547 325.830  1.00  0.00           C
ATOM   3095  HG2 GLN X 193     216.960 239.460 325.766  1.00  0.00           H
ATOM   3096  HG3 GLN X 193     217.774 240.794 326.560  1.00  0.00           H
ATOM   3097  CD  GLN X 193     215.774 241.264 326.395  1.00  0.00           C
ATOM   3098  OE1 GLN X 193     214.722 240.703 326.309  1.00  0.00           O
ATOM   3099  NE2 GLN X 193     215.887 242.538 326.762  1.00  0.00           N
ATOM   3100 HE21 GLN X 193     215.065 243.046 327.053  1.00  0.00           H
ATOM   3101 HE22 GLN X 193     216.770 243.004 326.915  1.00  0.00           H
ATOM   3102  C   GLN X 193     215.939 239.621 322.991  1.00  0.00           C
ATOM   3103  O   GLN X 193     216.589 238.762 322.350  1.00  0.00           O
ATOM   3104  N   PHE X 194     214.687 239.423 323.350  1.00  0.00           N
ATOM   3105  H   PHE X 194     214.135 240.141 323.798  1.00  0.00           H
ATOM   3106  CA  PHE X 194     214.066 238.143 323.417  1.00  0.00           C
ATOM   3107  HA  PHE X 194     214.789 237.328 323.421  1.00  0.00           H
ATOM   3108  CB  PHE X 194     213.254 238.040 324.664  1.00  0.00           C
ATOM   3109  HB2 PHE X 194     213.847 238.319 325.535  1.00  0.00           H
ATOM   3110  HB3 PHE X 194     212.516 238.840 324.621  1.00  0.00           H
ATOM   3111  CG  PHE X 194     212.562 236.712 324.919  1.00  0.00           C
ATOM   3112  CD1 PHE X 194     213.304 235.525 325.219  1.00  0.00           C
ATOM   3113  HD1 PHE X 194     214.363 235.525 325.434  1.00  0.00           H
ATOM   3114  CE1 PHE X 194     212.619 234.298 325.255  1.00  0.00           C
ATOM   3115  HE1 PHE X 194     213.149 233.378 325.457  1.00  0.00           H
ATOM   3116  CZ  PHE X 194     211.237 234.308 325.096  1.00  0.00           C
ATOM   3117  HZ  PHE X 194     210.645 233.405 325.089  1.00  0.00           H
ATOM   3118  CE2 PHE X 194     210.521 235.398 324.647  1.00  0.00           C
ATOM   3119  HE2 PHE X 194     209.552 235.237 324.200  1.00  0.00           H
ATOM   3120  CD2 PHE X 194     211.248 236.597 324.478  1.00  0.00           C
ATOM   3121  HD2 PHE X 194     210.808 237.481 324.042  1.00  0.00           H
ATOM   3122  C   PHE X 194     213.233 237.904 322.074  1.00  0.00           C
ATOM   3123  O   PHE X 194     213.305 236.831 321.458  1.00  0.00           O
ATOM   3124  N   LEU X 195     212.511 238.866 321.520  1.00  0.00           N
ATOM   3125  H   LEU X 195     212.298 239.662 322.104  1.00  0.00           H
ATOM   3126  CA  LEU X 195     211.993 238.728 320.178  1.00  0.00           C
ATOM   3127  HA  LEU X 195     211.421 237.804 320.266  1.00  0.00           H
ATOM   3128  CB  LEU X 195     211.037 239.905 319.798  1.00  0.00           C
ATOM   3129  HB2 LEU X 195     211.631 240.760 319.476  1.00  0.00           H
ATOM   3130  HB3 LEU X 195     210.380 239.671 318.961  1.00  0.00           H
ATOM   3131  CG  LEU X 195     209.984 240.313 320.869  1.00  0.00           C
ATOM   3132  HG  LEU X 195     210.604 240.668 321.692  1.00  0.00           H
ATOM   3133  CD1 LEU X 195     209.249 241.486 320.249  1.00  0.00           C
ATOM   3134 HD11 LEU X 195     210.002 242.263 320.114  1.00  0.00           H
ATOM   3135 HD12 LEU X 195     208.741 241.277 319.308  1.00  0.00           H
ATOM   3136 HD13 LEU X 195     208.584 241.823 321.044  1.00  0.00           H
ATOM   3137  CD2 LEU X 195     209.079 239.208 321.335  1.00  0.00           C
ATOM   3138 HD21 LEU X 195     209.718 238.457 321.800  1.00  0.00           H
ATOM   3139 HD22 LEU X 195     208.406 239.621 322.087  1.00  0.00           H
ATOM   3140 HD23 LEU X 195     208.437 238.784 320.564  1.00  0.00           H
ATOM   3141  C   LEU X 195     213.155 238.584 319.162  1.00  0.00           C
ATOM   3142  O   LEU X 195     212.889 238.209 318.024  1.00  0.00           O
ATOM   3143  N   ASN X 196     214.299 239.082 319.437  1.00  0.00           N
ATOM   3144  H   ASN X 196     214.413 239.428 320.379  1.00  0.00           H
ATOM   3145  CA  ASN X 196     215.564 239.089 318.579  1.00  0.00           C
ATOM   3146  HA  ASN X 196     215.313 239.277 317.535  1.00  0.00           H
ATOM   3147  CB  ASN X 196     216.478 240.230 318.966  1.00  0.00           C
ATOM   3148  HB2 ASN X 196     216.005 241.209 318.889  1.00  0.00           H
ATOM   3149  HB3 ASN X 196     216.824 240.012 319.976  1.00  0.00           H
ATOM   3150  CG  ASN X 196     217.680 240.124 318.103  1.00  0.00           C
ATOM   3151  OD1 ASN X 196     218.565 239.277 318.244  1.00  0.00           O
ATOM   3152  ND2 ASN X 196     217.888 241.167 317.244  1.00  0.00           N
ATOM   3153 HD21 ASN X 196     218.716 241.192 316.666  1.00  0.00           H
ATOM   3154 HD22 ASN X 196     217.282 241.974 317.215  1.00  0.00           H
ATOM   3155  C   ASN X 196     216.231 237.673 318.674  1.00  0.00           C
ATOM   3156  O   ASN X 196     216.393 237.090 317.653  1.00  0.00           O
ATOM   3157  N   LEU X 197     216.286 237.129 319.846  1.00  0.00           N
ATOM   3158  H   LEU X 197     216.143 237.801 320.587  1.00  0.00           H
ATOM   3159  CA  LEU X 197     216.768 235.792 320.101  1.00  0.00           C
ATOM   3160  HA  LEU X 197     217.680 235.760 319.504  1.00  0.00           H
ATOM   3161  CB  LEU X 197     216.874 235.630 321.615  1.00  0.00           C
ATOM   3162  HB2 LEU X 197     217.687 236.253 321.988  1.00  0.00           H
ATOM   3163  HB3 LEU X 197     216.036 236.064 322.161  1.00  0.00           H
ATOM   3164  CG  LEU X 197     217.030 234.164 322.006  1.00  0.00           C
ATOM   3165  HG  LEU X 197     217.625 233.660 321.244  1.00  0.00           H
ATOM   3166  CD1 LEU X 197     217.812 234.244 323.312  1.00  0.00           C
ATOM   3167 HD11 LEU X 197     217.488 235.088 323.921  1.00  0.00           H
ATOM   3168 HD12 LEU X 197     217.638 233.276 323.784  1.00  0.00           H
ATOM   3169 HD13 LEU X 197     218.878 234.284 323.090  1.00  0.00           H
ATOM   3170  CD2 LEU X 197     215.782 233.299 322.333  1.00  0.00           C
ATOM   3171 HD21 LEU X 197     215.146 233.131 321.464  1.00  0.00           H
ATOM   3172 HD22 LEU X 197     216.136 232.332 322.690  1.00  0.00           H
ATOM   3173 HD23 LEU X 197     215.132 233.846 323.015  1.00  0.00           H
ATOM   3174  C   LEU X 197     215.832 234.748 319.403  1.00  0.00           C
ATOM   3175  O   LEU X 197     216.351 233.788 318.900  1.00  0.00           O
ATOM   3176  N   MET X 198     214.527 234.895 319.481  1.00  0.00           N
ATOM   3177  H   MET X 198     214.189 235.779 319.834  1.00  0.00           H
ATOM   3178  CA  MET X 198     213.533 233.940 319.084  1.00  0.00           C
ATOM   3179  HA  MET X 198     213.837 232.947 319.414  1.00  0.00           H
ATOM   3180  CB  MET X 198     212.166 234.387 319.579  1.00  0.00           C
ATOM   3181  HB2 MET X 198     212.077 235.443 319.321  1.00  0.00           H
ATOM   3182  HB3 MET X 198     211.402 233.744 319.142  1.00  0.00           H
ATOM   3183  CG  MET X 198     212.014 234.136 321.012  1.00  0.00           C
ATOM   3184  HG2 MET X 198     212.842 234.408 321.666  1.00  0.00           H
ATOM   3185  HG3 MET X 198     211.165 234.682 321.426  1.00  0.00           H
ATOM   3186  SD  MET X 198     211.591 232.399 321.307  1.00  0.00           S
ATOM   3187  CE  MET X 198     209.797 232.618 321.317  1.00  0.00           C
ATOM   3188  HE1 MET X 198     209.328 232.868 320.365  1.00  0.00           H
ATOM   3189  HE2 MET X 198     209.359 231.645 321.535  1.00  0.00           H
ATOM   3190  HE3 MET X 198     209.566 233.335 322.104  1.00  0.00           H
ATOM   3191  C   MET X 198     213.551 233.686 317.557  1.00  0.00           C
ATOM   3192  O   MET X 198     213.181 232.595 317.121  1.00  0.00           O
ATOM   3193  N   GLU X 199     214.091 234.604 316.770  1.00  0.00           N
ATOM   3194  H   GLU X 199     214.478 235.442 317.178  1.00  0.00           H
ATOM   3195  CA  GLU X 199     214.299 234.332 315.359  1.00  0.00           C
ATOM   3196  HA  GLU X 199     213.546 233.603 315.060  1.00  0.00           H
ATOM   3197  CB  GLU X 199     214.101 235.683 314.608  1.00  0.00           C
ATOM   3198  HB2 GLU X 199     213.280 236.321 314.935  1.00  0.00           H
ATOM   3199  HB3 GLU X 199     214.990 236.203 314.964  1.00  0.00           H
ATOM   3200  CG  GLU X 199     214.067 235.607 313.122  1.00  0.00           C
ATOM   3201  HG2 GLU X 199     214.108 236.614 312.707  1.00  0.00           H
ATOM   3202  HG3 GLU X 199     214.869 235.017 312.680  1.00  0.00           H
ATOM   3203  CD  GLU X 199     212.793 235.078 312.489  1.00  0.00           C
ATOM   3204  OE1 GLU X 199     212.353 235.670 311.445  1.00  0.00           O
ATOM   3205  OE2 GLU X 199     212.295 234.065 313.057  1.00  0.00           O
ATOM   3206  C   GLU X 199     215.607 233.499 315.122  1.00  0.00           C
ATOM   3207  O   GLU X 199     215.622 232.688 314.244  1.00  0.00           O
ATOM   3208  N   LYS X 200     216.636 233.607 315.961  1.00  0.00           N
ATOM   3209  H   LYS X 200     216.528 234.163 316.798  1.00  0.00           H
ATOM   3210  CA  LYS X 200     217.936 233.060 315.741  1.00  0.00           C
ATOM   3211  HA  LYS X 200     218.045 232.967 314.660  1.00  0.00           H
ATOM   3212  CB  LYS X 200     219.034 233.951 316.296  1.00  0.00           C
ATOM   3213  HB2 LYS X 200     218.838 233.991 317.368  1.00  0.00           H
ATOM   3214  HB3 LYS X 200     219.982 233.471 316.050  1.00  0.00           H
ATOM   3215  CG  LYS X 200     219.030 235.350 315.677  1.00  0.00           C
ATOM   3216  HG2 LYS X 200     219.346 235.258 314.637  1.00  0.00           H
ATOM   3217  HG3 LYS X 200     218.047 235.812 315.769  1.00  0.00           H
ATOM   3218  CD  LYS X 200     220.024 236.271 316.357  1.00  0.00           C
ATOM   3219  HD2 LYS X 200     219.794 236.183 317.418  1.00  0.00           H
ATOM   3220  HD3 LYS X 200     221.029 235.887 316.182  1.00  0.00           H
ATOM   3221  CE  LYS X 200     219.926 237.684 315.836  1.00  0.00           C
ATOM   3222  HE2 LYS X 200     220.047 237.681 314.752  1.00  0.00           H
ATOM   3223  HE3 LYS X 200     218.959 238.092 316.129  1.00  0.00           H
ATOM   3224  NZ  LYS X 200     221.045 238.546 316.397  1.00  0.00           N
ATOM   3225  HZ1 LYS X 200     221.957 238.185 316.156  1.00  0.00           H
ATOM   3226  HZ2 LYS X 200     220.922 238.740 317.381  1.00  0.00           H
ATOM   3227  HZ3 LYS X 200     221.047 239.479 316.011  1.00  0.00           H
ATOM   3228  C   LYS X 200     217.998 231.656 316.410  1.00  0.00           C
ATOM   3229  O   LYS X 200     218.847 230.892 316.004  1.00  0.00           O
ATOM   3230  N   LEU X 201     217.247 231.432 317.465  1.00  0.00           N
ATOM   3231  H   LEU X 201     216.636 232.125 317.873  1.00  0.00           H
ATOM   3232  CA  LEU X 201     217.225 230.156 318.153  1.00  0.00           C
ATOM   3233  HA  LEU X 201     218.247 229.778 318.157  1.00  0.00           H
ATOM   3234  CB  LEU X 201     216.605 230.271 319.603  1.00  0.00           C
ATOM   3235  HB2 LEU X 201     217.306 230.917 320.131  1.00  0.00           H
ATOM   3236  HB3 LEU X 201     215.606 230.704 319.553  1.00  0.00           H
ATOM   3237  CG  LEU X 201     216.525 228.911 320.340  1.00  0.00           C
ATOM   3238  HG  LEU X 201     216.116 228.118 319.713  1.00  0.00           H
ATOM   3239  CD1 LEU X 201     217.959 228.419 320.718  1.00  0.00           C
ATOM   3240 HD11 LEU X 201     218.649 228.339 319.879  1.00  0.00           H
ATOM   3241 HD12 LEU X 201     218.306 229.195 321.400  1.00  0.00           H
ATOM   3242 HD13 LEU X 201     218.000 227.494 321.294  1.00  0.00           H
ATOM   3243  CD2 LEU X 201     215.639 229.042 321.515  1.00  0.00           C
ATOM   3244 HD21 LEU X 201     214.650 229.442 321.293  1.00  0.00           H
ATOM   3245 HD22 LEU X 201     215.521 228.104 322.057  1.00  0.00           H
ATOM   3246 HD23 LEU X 201     215.984 229.745 322.274  1.00  0.00           H
ATOM   3247  C   LEU X 201     216.364 229.142 317.350  1.00  0.00           C
ATOM   3248  O   LEU X 201     216.759 228.004 317.066  1.00  0.00           O
ATOM   3249  N   ASN X 202     215.186 229.573 316.842  1.00  0.00           N
ATOM   3250  H   ASN X 202     214.790 230.470 317.084  1.00  0.00           H
ATOM   3251  CA  ASN X 202     214.455 228.848 315.783  1.00  0.00           C
ATOM   3252  HA  ASN X 202     214.207 227.846 316.132  1.00  0.00           H
ATOM   3253  CB  ASN X 202     213.118 229.454 315.458  1.00  0.00           C
ATOM   3254  HB2 ASN X 202     212.484 229.479 316.345  1.00  0.00           H
ATOM   3255  HB3 ASN X 202     213.333 230.424 315.010  1.00  0.00           H
ATOM   3256  CG  ASN X 202     212.307 228.717 314.422  1.00  0.00           C
ATOM   3257  OD1 ASN X 202     212.053 227.539 314.495  1.00  0.00           O
ATOM   3258  ND2 ASN X 202     211.792 229.362 313.414  1.00  0.00           N
ATOM   3259 HD21 ASN X 202     211.137 228.856 312.835  1.00  0.00           H
ATOM   3260 HD22 ASN X 202     212.032 230.329 313.245  1.00  0.00           H
ATOM   3261  C   ASN X 202     215.347 228.602 314.490  1.00  0.00           C
ATOM   3262  O   ASN X 202     215.392 227.512 313.967  1.00  0.00           O
ATOM   3263  N   GLU X 203     216.207 229.568 314.082  1.00  0.00           N
ATOM   3264  H   GLU X 203     215.894 230.499 314.318  1.00  0.00           H
ATOM   3265  CA  GLU X 203     217.267 229.336 313.066  1.00  0.00           C
ATOM   3266  HA  GLU X 203     216.693 229.006 312.200  1.00  0.00           H
ATOM   3267  CB  GLU X 203     217.941 230.632 312.702  1.00  0.00           C
ATOM   3268  HB2 GLU X 203     217.251 231.412 312.381  1.00  0.00           H
ATOM   3269  HB3 GLU X 203     218.546 230.939 313.555  1.00  0.00           H
ATOM   3270  CG  GLU X 203     218.919 230.598 311.518  1.00  0.00           C
ATOM   3271  HG2 GLU X 203     219.270 231.599 311.270  1.00  0.00           H
ATOM   3272  HG3 GLU X 203     219.728 229.904 311.747  1.00  0.00           H
ATOM   3273  CD  GLU X 203     218.242 230.186 310.175  1.00  0.00           C
ATOM   3274  OE1 GLU X 203     218.997 229.636 309.352  1.00  0.00           O
ATOM   3275  OE2 GLU X 203     217.014 230.543 309.974  1.00  0.00           O
ATOM   3276  C   GLU X 203     218.262 228.164 313.364  1.00  0.00           C
ATOM   3277  O   GLU X 203     218.608 227.432 312.390  1.00  0.00           O
ATOM   3278  N   ASN X 204     218.755 228.034 314.620  1.00  0.00           N
ATOM   3279  H   ASN X 204     218.377 228.634 315.340  1.00  0.00           H
ATOM   3280  CA  ASN X 204     219.682 226.935 314.982  1.00  0.00           C
ATOM   3281  HA  ASN X 204     220.526 227.079 314.308  1.00  0.00           H
ATOM   3282  CB  ASN X 204     220.257 227.207 316.363  1.00  0.00           C
ATOM   3283  HB2 ASN X 204     219.457 227.641 316.963  1.00  0.00           H
ATOM   3284  HB3 ASN X 204     220.466 226.241 316.824  1.00  0.00           H
ATOM   3285  CG  ASN X 204     221.458 228.150 316.541  1.00  0.00           C
ATOM   3286  OD1 ASN X 204     222.359 227.892 317.348  1.00  0.00           O
ATOM   3287  ND2 ASN X 204     221.310 229.399 316.163  1.00  0.00           N
ATOM   3288 HD21 ASN X 204     222.098 230.006 316.335  1.00  0.00           H
ATOM   3289 HD22 ASN X 204     220.393 229.762 315.944  1.00  0.00           H
ATOM   3290  C   ASN X 204     219.094 225.451 314.748  1.00  0.00           C
ATOM   3291  O   ASN X 204     219.725 224.498 314.324  1.00  0.00           O
ATOM   3292  N   ILE X 205     217.770 225.306 315.114  1.00  0.00           N
ATOM   3293  H   ILE X 205     217.299 226.092 315.539  1.00  0.00           H
ATOM   3294  CA  ILE X 205     217.061 224.052 314.862  1.00  0.00           C
ATOM   3295  HA  ILE X 205     217.757 223.222 314.981  1.00  0.00           H
ATOM   3296  CB  ILE X 205     215.895 223.811 315.865  1.00  0.00           C
ATOM   3297  HB  ILE X 205     216.386 223.810 316.838  1.00  0.00           H
ATOM   3298  CG2 ILE X 205     214.823 224.931 315.823  1.00  0.00           C
ATOM   3299 HG21 ILE X 205     214.109 224.781 316.633  1.00  0.00           H
ATOM   3300 HG22 ILE X 205     214.399 224.880 314.820  1.00  0.00           H
ATOM   3301 HG23 ILE X 205     215.308 225.904 315.916  1.00  0.00           H
ATOM   3302  CG1 ILE X 205     215.259 222.480 315.735  1.00  0.00           C
ATOM   3303 HG12 ILE X 205     214.449 222.595 316.455  1.00  0.00           H
ATOM   3304 HG13 ILE X 205     214.924 222.240 314.726  1.00  0.00           H
ATOM   3305  CD1 ILE X 205     216.159 221.381 316.257  1.00  0.00           C
ATOM   3306 HD11 ILE X 205     216.537 221.687 317.233  1.00  0.00           H
ATOM   3307 HD12 ILE X 205     215.636 220.434 316.386  1.00  0.00           H
ATOM   3308 HD13 ILE X 205     217.080 221.228 315.695  1.00  0.00           H
ATOM   3309  C   ILE X 205     216.540 223.905 313.390  1.00  0.00           C
ATOM   3310  O   ILE X 205     216.406 222.816 312.790  1.00  0.00           O
ATOM   3311  N   LYS X 206     216.320 225.049 312.662  1.00  0.00           N
ATOM   3312  H   LYS X 206     216.446 225.950 313.101  1.00  0.00           H
ATOM   3313  CA  LYS X 206     215.787 225.147 311.247  1.00  0.00           C
ATOM   3314  HA  LYS X 206     214.800 224.688 311.190  1.00  0.00           H
ATOM   3315  CB  LYS X 206     215.717 226.642 310.812  1.00  0.00           C
ATOM   3316  HB2 LYS X 206     215.345 227.279 311.614  1.00  0.00           H
ATOM   3317  HB3 LYS X 206     216.703 226.937 310.450  1.00  0.00           H
ATOM   3318  CG  LYS X 206     214.821 226.843 309.625  1.00  0.00           C
ATOM   3319  HG2 LYS X 206     215.367 226.418 308.782  1.00  0.00           H
ATOM   3320  HG3 LYS X 206     213.910 226.245 309.600  1.00  0.00           H
ATOM   3321  CD  LYS X 206     214.588 228.257 309.282  1.00  0.00           C
ATOM   3322  HD2 LYS X 206     215.514 228.801 309.099  1.00  0.00           H
ATOM   3323  HD3 LYS X 206     214.003 228.254 308.363  1.00  0.00           H
ATOM   3324  CE  LYS X 206     213.743 229.030 310.237  1.00  0.00           C
ATOM   3325  HE2 LYS X 206     212.676 228.909 310.052  1.00  0.00           H
ATOM   3326  HE3 LYS X 206     213.909 228.671 311.252  1.00  0.00           H
ATOM   3327  NZ  LYS X 206     214.113 230.472 310.217  1.00  0.00           N
ATOM   3328  HZ1 LYS X 206     215.116 230.575 310.156  1.00  0.00           H
ATOM   3329  HZ2 LYS X 206     213.811 230.851 311.104  1.00  0.00           H
ATOM   3330  HZ3 LYS X 206     213.790 230.961 309.395  1.00  0.00           H
ATOM   3331  C   LYS X 206     216.515 224.270 310.212  1.00  0.00           C
ATOM   3332  O   LYS X 206     215.861 223.666 309.432  1.00  0.00           O
ATOM   3333  N   ILE X 207     217.855 224.053 310.393  1.00  0.00           N
ATOM   3334  H   ILE X 207     218.348 224.691 311.002  1.00  0.00           H
ATOM   3335  CA  ILE X 207     218.678 223.096 309.675  1.00  0.00           C
ATOM   3336  HA  ILE X 207     218.682 223.422 308.635  1.00  0.00           H
ATOM   3337  CB  ILE X 207     220.129 223.171 310.319  1.00  0.00           C
ATOM   3338  HB  ILE X 207     220.303 224.247 310.305  1.00  0.00           H
ATOM   3339  CG2 ILE X 207     220.071 222.639 311.772  1.00  0.00           C
ATOM   3340 HG21 ILE X 207     220.924 223.103 312.267  1.00  0.00           H
ATOM   3341 HG22 ILE X 207     220.168 221.566 311.933  1.00  0.00           H
ATOM   3342 HG23 ILE X 207     219.152 222.963 312.262  1.00  0.00           H
ATOM   3343  CG1 ILE X 207     221.242 222.369 309.659  1.00  0.00           C
ATOM   3344 HG12 ILE X 207     222.179 222.694 310.111  1.00  0.00           H
ATOM   3345 HG13 ILE X 207     221.107 221.288 309.686  1.00  0.00           H
ATOM   3346  CD1 ILE X 207     221.325 222.703 308.140  1.00  0.00           C
ATOM   3347 HD11 ILE X 207     222.192 222.181 307.735  1.00  0.00           H
ATOM   3348 HD12 ILE X 207     220.445 222.458 307.544  1.00  0.00           H
ATOM   3349 HD13 ILE X 207     221.679 223.733 308.176  1.00  0.00           H
ATOM   3350  C   ILE X 207     218.154 221.624 309.619  1.00  0.00           C
ATOM   3351  O   ILE X 207     218.365 220.897 308.692  1.00  0.00           O
ATOM   3352  N   LEU X 208     217.401 221.183 310.645  1.00  0.00           N
ATOM   3353  H   LEU X 208     217.111 221.798 311.392  1.00  0.00           H
ATOM   3354  CA  LEU X 208     216.722 219.844 310.702  1.00  0.00           C
ATOM   3355  HA  LEU X 208     217.121 219.220 309.902  1.00  0.00           H
ATOM   3356  CB  LEU X 208     217.134 219.115 312.006  1.00  0.00           C
ATOM   3357  HB2 LEU X 208     216.745 219.606 312.898  1.00  0.00           H
ATOM   3358  HB3 LEU X 208     216.689 218.123 311.936  1.00  0.00           H
ATOM   3359  CG  LEU X 208     218.678 218.934 312.297  1.00  0.00           C
ATOM   3360  HG  LEU X 208     219.097 219.910 312.541  1.00  0.00           H
ATOM   3361  CD1 LEU X 208     218.934 217.959 313.442  1.00  0.00           C
ATOM   3362 HD11 LEU X 208     218.312 218.175 314.310  1.00  0.00           H
ATOM   3363 HD12 LEU X 208     219.054 216.898 313.225  1.00  0.00           H
ATOM   3364 HD13 LEU X 208     219.959 218.060 313.799  1.00  0.00           H
ATOM   3365  CD2 LEU X 208     219.455 218.337 311.112  1.00  0.00           C
ATOM   3366 HD21 LEU X 208     220.506 218.327 311.399  1.00  0.00           H
ATOM   3367 HD22 LEU X 208     218.933 217.384 311.029  1.00  0.00           H
ATOM   3368 HD23 LEU X 208     219.339 219.017 310.268  1.00  0.00           H
ATOM   3369  C   LEU X 208     215.200 219.961 310.521  1.00  0.00           C
ATOM   3370  O   LEU X 208     214.647 218.959 310.024  1.00  0.00           O
ATOM   3371  N   SER X 209     214.536 221.145 310.831  1.00  0.00           N
ATOM   3372  H   SER X 209     215.042 221.870 311.320  1.00  0.00           H
ATOM   3373  CA  SER X 209     213.123 221.218 310.686  1.00  0.00           C
ATOM   3374  HA  SER X 209     212.741 220.200 310.756  1.00  0.00           H
ATOM   3375  CB  SER X 209     212.518 222.031 311.833  1.00  0.00           C
ATOM   3376  HB2 SER X 209     211.428 222.047 311.818  1.00  0.00           H
ATOM   3377  HB3 SER X 209     212.873 221.775 312.831  1.00  0.00           H
ATOM   3378  OG  SER X 209     212.751 223.369 311.535  1.00  0.00           O
ATOM   3379  HG  SER X 209     212.452 223.852 312.309  1.00  0.00           H
ATOM   3380  C   SER X 209     212.586 221.741 309.348  1.00  0.00           C
ATOM   3381  O   SER X 209     211.441 221.392 308.920  1.00  0.00           O
ATOM   3382  N   SER X 210     213.441 222.505 308.660  1.00  0.00           N
ATOM   3383  H   SER X 210     214.318 222.782 309.077  1.00  0.00           H
ATOM   3384  CA  SER X 210     213.196 223.100 307.371  1.00  0.00           C
ATOM   3385  HA  SER X 210     212.160 223.425 307.456  1.00  0.00           H
ATOM   3386  CB  SER X 210     214.120 224.259 306.923  1.00  0.00           C
ATOM   3387  HB2 SER X 210     213.935 225.100 307.592  1.00  0.00           H
ATOM   3388  HB3 SER X 210     215.162 223.983 307.084  1.00  0.00           H
ATOM   3389  OG  SER X 210     213.802 224.652 305.596  1.00  0.00           O
ATOM   3390  HG  SER X 210     213.036 225.223 305.692  1.00  0.00           H
ATOM   3391  C   SER X 210     213.173 221.956 306.284  1.00  0.00           C
ATOM   3392  O   SER X 210     214.121 221.218 306.254  1.00  0.00           O
ATOM   3393  N   PRO X 211     212.042 221.703 305.576  1.00  0.00           N
ATOM   3394  CD  PRO X 211     210.770 222.374 305.560  1.00  0.00           C
ATOM   3395  HD2 PRO X 211     210.982 223.442 305.507  1.00  0.00           H
ATOM   3396  HD3 PRO X 211     210.266 222.233 306.516  1.00  0.00           H
ATOM   3397  CG  PRO X 211     209.915 221.775 304.461  1.00  0.00           C
ATOM   3398  HG2 PRO X 211     210.238 222.119 303.478  1.00  0.00           H
ATOM   3399  HG3 PRO X 211     208.842 221.866 304.628  1.00  0.00           H
ATOM   3400  CB  PRO X 211     210.396 220.359 304.518  1.00  0.00           C
ATOM   3401  HB2 PRO X 211     210.080 219.855 303.605  1.00  0.00           H
ATOM   3402  HB3 PRO X 211     209.842 219.849 305.307  1.00  0.00           H
ATOM   3403  CA  PRO X 211     211.914 220.476 304.831  1.00  0.00           C
ATOM   3404  HA  PRO X 211     212.224 219.614 305.422  1.00  0.00           H
ATOM   3405  C   PRO X 211     212.697 220.460 303.534  1.00  0.00           C
ATOM   3406  O   PRO X 211     213.405 219.462 303.257  1.00  0.00           O
ATOM   3407  N   TRP X 212     212.711 221.437 302.716  1.00  0.00           N
ATOM   3408  H   TRP X 212     212.105 222.232 302.862  1.00  0.00           H
ATOM   3409  CA  TRP X 212     213.596 221.581 301.505  1.00  0.00           C
ATOM   3410  HA  TRP X 212     213.647 220.678 300.896  1.00  0.00           H
ATOM   3411  CB  TRP X 212     213.031 222.734 300.740  1.00  0.00           C
ATOM   3412  HB2 TRP X 212     213.472 222.664 299.746  1.00  0.00           H
ATOM   3413  HB3 TRP X 212     211.963 222.541 300.643  1.00  0.00           H
ATOM   3414  CG  TRP X 212     213.346 224.073 301.384  1.00  0.00           C
ATOM   3415  CD1 TRP X 212     212.508 224.759 302.201  1.00  0.00           C
ATOM   3416  HD1 TRP X 212     211.555 224.428 302.589  1.00  0.00           H
ATOM   3417  NE1 TRP X 212     213.113 225.913 302.714  1.00  0.00           N
ATOM   3418  HE1 TRP X 212     212.619 226.578 303.292  1.00  0.00           H
ATOM   3419  CE2 TRP X 212     214.212 226.140 301.908  1.00  0.00           C
ATOM   3420  CZ2 TRP X 212     215.029 227.213 301.955  1.00  0.00           C
ATOM   3421  HZ2 TRP X 212     214.730 228.077 302.530  1.00  0.00           H
ATOM   3422  CH2 TRP X 212     216.294 227.151 301.277  1.00  0.00           C
ATOM   3423  HH2 TRP X 212     216.992 227.973 301.340  1.00  0.00           H
ATOM   3424  CZ3 TRP X 212     216.637 225.981 300.536  1.00  0.00           C
ATOM   3425  HZ3 TRP X 212     217.592 225.968 300.032  1.00  0.00           H
ATOM   3426  CE3 TRP X 212     215.705 224.925 300.409  1.00  0.00           C
ATOM   3427  HE3 TRP X 212     215.973 224.098 299.769  1.00  0.00           H
ATOM   3428  CD2 TRP X 212     214.467 224.991 301.149  1.00  0.00           C
ATOM   3429  C   TRP X 212     215.053 221.939 301.805  1.00  0.00           C
ATOM   3430  O   TRP X 212     215.882 221.762 300.891  1.00  0.00           O
ATOM   3431  N   ILE X 213     215.400 222.334 303.036  1.00  0.00           N
ATOM   3432  H   ILE X 213     214.694 222.358 303.758  1.00  0.00           H
ATOM   3433  CA  ILE X 213     216.792 222.153 303.389  1.00  0.00           C
ATOM   3434  HA  ILE X 213     217.533 222.506 302.672  1.00  0.00           H
ATOM   3435  CB  ILE X 213     217.078 222.894 304.743  1.00  0.00           C
ATOM   3436  HB  ILE X 213     216.299 222.643 305.463  1.00  0.00           H
ATOM   3437  CG2 ILE X 213     218.395 222.523 305.392  1.00  0.00           C
ATOM   3438 HG21 ILE X 213     219.201 222.533 304.659  1.00  0.00           H
ATOM   3439 HG22 ILE X 213     218.298 221.540 305.852  1.00  0.00           H
ATOM   3440 HG23 ILE X 213     218.563 223.191 306.238  1.00  0.00           H
ATOM   3441  CG1 ILE X 213     217.177 224.395 304.487  1.00  0.00           C
ATOM   3442 HG12 ILE X 213     216.262 224.833 304.086  1.00  0.00           H
ATOM   3443 HG13 ILE X 213     217.144 224.842 305.481  1.00  0.00           H
ATOM   3444  CD1 ILE X 213     218.359 224.944 303.656  1.00  0.00           C
ATOM   3445 HD11 ILE X 213     218.084 225.848 303.113  1.00  0.00           H
ATOM   3446 HD12 ILE X 213     219.225 225.102 304.300  1.00  0.00           H
ATOM   3447 HD13 ILE X 213     218.718 224.231 302.915  1.00  0.00           H
ATOM   3448  C   ILE X 213     217.231 220.689 303.443  1.00  0.00           C
ATOM   3449  O   ILE X 213     218.430 220.406 303.252  1.00  0.00           O
ATOM   3450  N   GLN X 214     216.362 219.679 303.713  1.00  0.00           N
ATOM   3451  H   GLN X 214     215.386 219.929 303.790  1.00  0.00           H
ATOM   3452  CA  GLN X 214     216.754 218.240 303.677  1.00  0.00           C
ATOM   3453  HA  GLN X 214     217.674 218.202 304.261  1.00  0.00           H
ATOM   3454  CB  GLN X 214     215.759 217.360 304.384  1.00  0.00           C
ATOM   3455  HB2 GLN X 214     214.905 217.251 303.716  1.00  0.00           H
ATOM   3456  HB3 GLN X 214     216.227 216.378 304.449  1.00  0.00           H
ATOM   3457  CG  GLN X 214     215.321 217.755 305.859  1.00  0.00           C
ATOM   3458  HG2 GLN X 214     214.562 218.517 305.676  1.00  0.00           H
ATOM   3459  HG3 GLN X 214     214.739 216.931 306.272  1.00  0.00           H
ATOM   3460  CD  GLN X 214     216.449 218.343 306.753  1.00  0.00           C
ATOM   3461  OE1 GLN X 214     217.272 217.608 307.289  1.00  0.00           O
ATOM   3462  NE2 GLN X 214     216.406 219.636 306.895  1.00  0.00           N
ATOM   3463 HE21 GLN X 214     216.971 220.102 307.591  1.00  0.00           H
ATOM   3464 HE22 GLN X 214     215.622 220.189 306.577  1.00  0.00           H
ATOM   3465  C   GLN X 214     217.186 217.709 302.255  1.00  0.00           C
ATOM   3466  O   GLN X 214     217.974 216.733 302.194  1.00  0.00           O
ATOM   3467  N   ILE X 215     216.838 218.376 301.136  1.00  0.00           N
ATOM   3468  H   ILE X 215     216.282 219.217 301.197  1.00  0.00           H
ATOM   3469  CA  ILE X 215     217.397 218.042 299.841  1.00  0.00           C
ATOM   3470  HA  ILE X 215     216.976 217.077 299.559  1.00  0.00           H
ATOM   3471  CB  ILE X 215     216.960 219.228 298.876  1.00  0.00           C
ATOM   3472  HB  ILE X 215     217.304 220.183 299.273  1.00  0.00           H
ATOM   3473  CG2 ILE X 215     217.707 219.103 297.511  1.00  0.00           C
ATOM   3474 HG21 ILE X 215     218.761 219.378 297.542  1.00  0.00           H
ATOM   3475 HG22 ILE X 215     217.269 219.838 296.835  1.00  0.00           H
ATOM   3476 HG23 ILE X 215     217.655 218.126 297.030  1.00  0.00           H
ATOM   3477  CG1 ILE X 215     215.468 219.149 298.640  1.00  0.00           C
ATOM   3478 HG12 ILE X 215     215.226 218.472 297.821  1.00  0.00           H
ATOM   3479 HG13 ILE X 215     214.960 218.992 299.591  1.00  0.00           H
ATOM   3480  CD1 ILE X 215     214.932 220.506 298.137  1.00  0.00           C
ATOM   3481 HD11 ILE X 215     214.996 220.639 297.057  1.00  0.00           H
ATOM   3482 HD12 ILE X 215     213.886 220.575 298.436  1.00  0.00           H
ATOM   3483 HD13 ILE X 215     215.362 221.420 298.548  1.00  0.00           H
ATOM   3484  C   ILE X 215     218.950 218.014 299.837  1.00  0.00           C
ATOM   3485  O   ILE X 215     219.451 217.176 299.103  1.00  0.00           O
ATOM   3486  N   CYS X 216     219.584 218.855 300.606  1.00  0.00           N
ATOM   3487  H   CYS X 216     219.010 219.446 301.190  1.00  0.00           H
ATOM   3488  CA  CYS X 216     221.035 218.897 300.703  1.00  0.00           C
ATOM   3489  HA  CYS X 216     221.438 219.256 299.756  1.00  0.00           H
ATOM   3490  CB  CYS X 216     221.422 219.959 301.694  1.00  0.00           C
ATOM   3491  HB2 CYS X 216     221.170 219.523 302.660  1.00  0.00           H
ATOM   3492  HB3 CYS X 216     222.506 220.075 301.663  1.00  0.00           H
ATOM   3493  SG  CYS X 216     220.593 221.573 301.382  1.00  0.00           S
ATOM   3494  HG  CYS X 216     220.294 221.761 302.671  1.00  0.00           H
ATOM   3495  C   CYS X 216     221.691 217.566 301.009  1.00  0.00           C
ATOM   3496  O   CYS X 216     222.890 217.380 300.808  1.00  0.00           O
ATOM   3497  N   ASN X 217     220.930 216.579 301.599  1.00  0.00           N
ATOM   3498  H   ASN X 217     219.935 216.676 301.740  1.00  0.00           H
ATOM   3499  CA  ASN X 217     221.486 215.300 301.862  1.00  0.00           C
ATOM   3500  HA  ASN X 217     222.550 215.347 302.096  1.00  0.00           H
ATOM   3501  CB  ASN X 217     220.716 214.755 303.058  1.00  0.00           C
ATOM   3502  HB2 ASN X 217     219.673 214.598 302.785  1.00  0.00           H
ATOM   3503  HB3 ASN X 217     221.147 213.790 303.324  1.00  0.00           H
ATOM   3504  CG  ASN X 217     220.847 215.614 304.248  1.00  0.00           C
ATOM   3505  OD1 ASN X 217     221.852 216.092 304.641  1.00  0.00           O
ATOM   3506  ND2 ASN X 217     219.728 215.908 304.840  1.00  0.00           N
ATOM   3507 HD21 ASN X 217     219.776 216.425 305.706  1.00  0.00           H
ATOM   3508 HD22 ASN X 217     218.920 215.378 304.545  1.00  0.00           H
ATOM   3509  C   ASN X 217     221.452 214.337 300.634  1.00  0.00           C
ATOM   3510  O   ASN X 217     221.947 213.189 300.696  1.00  0.00           O
ATOM   3511  N   ASN X 218     220.850 214.744 299.514  1.00  0.00           N
ATOM   3512  H   ASN X 218     220.330 215.606 299.599  1.00  0.00           H
ATOM   3513  CA  ASN X 218     220.979 214.033 298.236  1.00  0.00           C
ATOM   3514  HA  ASN X 218     221.711 213.228 298.304  1.00  0.00           H
ATOM   3515  CB  ASN X 218     219.581 213.479 297.918  1.00  0.00           C
ATOM   3516  HB2 ASN X 218     218.990 214.366 297.687  1.00  0.00           H
ATOM   3517  HB3 ASN X 218     219.690 212.857 297.030  1.00  0.00           H
ATOM   3518  CG  ASN X 218     218.917 212.587 298.906  1.00  0.00           C
ATOM   3519  OD1 ASN X 218     217.709 212.472 298.834  1.00  0.00           O
ATOM   3520  ND2 ASN X 218     219.508 212.035 299.866  1.00  0.00           N
ATOM   3521 HD21 ASN X 218     219.026 211.534 300.598  1.00  0.00           H
ATOM   3522 HD22 ASN X 218     220.501 212.174 299.990  1.00  0.00           H
ATOM   3523  C   ASN X 218     221.409 214.984 297.041  1.00  0.00           C
ATOM   3524  O   ASN X 218     221.802 214.502 295.979  1.00  0.00           O
ATOM   3525  N   PHE X 219     221.420 216.324 297.275  1.00  0.00           N
ATOM   3526  H   PHE X 219     221.393 216.592 298.249  1.00  0.00           H
ATOM   3527  CA  PHE X 219     221.920 217.278 296.345  1.00  0.00           C
ATOM   3528  HA  PHE X 219     222.709 216.749 295.809  1.00  0.00           H
ATOM   3529  CB  PHE X 219     220.848 217.564 295.254  1.00  0.00           C
ATOM   3530  HB2 PHE X 219     220.583 216.629 294.760  1.00  0.00           H
ATOM   3531  HB3 PHE X 219     219.890 217.858 295.681  1.00  0.00           H
ATOM   3532  CG  PHE X 219     221.435 218.310 294.018  1.00  0.00           C
ATOM   3533  CD1 PHE X 219     221.086 219.678 293.847  1.00  0.00           C
ATOM   3534  HD1 PHE X 219     220.448 220.157 294.575  1.00  0.00           H
ATOM   3535  CE1 PHE X 219     221.587 220.408 292.766  1.00  0.00           C
ATOM   3536  HE1 PHE X 219     221.332 221.446 292.612  1.00  0.00           H
ATOM   3537  CZ  PHE X 219     222.439 219.784 291.822  1.00  0.00           C
ATOM   3538  HZ  PHE X 219     222.852 220.355 291.003  1.00  0.00           H
ATOM   3539  CE2 PHE X 219     222.777 218.430 291.970  1.00  0.00           C
ATOM   3540  HE2 PHE X 219     223.435 218.006 291.226  1.00  0.00           H
ATOM   3541  CD2 PHE X 219     222.248 217.706 293.027  1.00  0.00           C
ATOM   3542  HD2 PHE X 219     222.447 216.646 292.970  1.00  0.00           H
ATOM   3543  C   PHE X 219     222.432 218.648 296.912  1.00  0.00           C
ATOM   3544  O   PHE X 219     221.794 219.716 296.733  1.00  0.00           O
ATOM   3545  N   SER X 220     223.519 218.574 297.598  1.00  0.00           N
ATOM   3546  H   SER X 220     224.073 217.730 297.631  1.00  0.00           H
ATOM   3547  CA  SER X 220     224.179 219.681 298.443  1.00  0.00           C
ATOM   3548  HA  SER X 220     223.605 219.930 299.335  1.00  0.00           H
ATOM   3549  CB  SER X 220     225.513 219.181 299.002  1.00  0.00           C
ATOM   3550  HB2 SER X 220     225.949 219.982 299.599  1.00  0.00           H
ATOM   3551  HB3 SER X 220     225.317 218.306 299.622  1.00  0.00           H
ATOM   3552  OG  SER X 220     226.407 218.906 297.980  1.00  0.00           O
ATOM   3553  HG  SER X 220     227.207 218.528 298.352  1.00  0.00           H
ATOM   3554  C   SER X 220     224.408 221.044 297.702  1.00  0.00           C
ATOM   3555  O   SER X 220     224.346 222.040 298.379  1.00  0.00           O
ATOM   3556  N   PRO X 221     224.356 221.191 296.345  1.00  0.00           N
ATOM   3557  CD  PRO X 221     224.625 220.196 295.371  1.00  0.00           C
ATOM   3558  HD2 PRO X 221     223.809 219.957 294.689  1.00  0.00           H
ATOM   3559  HD3 PRO X 221     224.979 219.302 295.885  1.00  0.00           H
ATOM   3560  CG  PRO X 221     225.721 220.768 294.471  1.00  0.00           C
ATOM   3561  HG2 PRO X 221     225.718 220.268 293.503  1.00  0.00           H
ATOM   3562  HG3 PRO X 221     226.696 220.689 294.954  1.00  0.00           H
ATOM   3563  CB  PRO X 221     225.256 222.172 294.380  1.00  0.00           C
ATOM   3564  HB2 PRO X 221     224.437 222.131 293.662  1.00  0.00           H
ATOM   3565  HB3 PRO X 221     226.041 222.868 294.085  1.00  0.00           H
ATOM   3566  CA  PRO X 221     224.701 222.487 295.738  1.00  0.00           C
ATOM   3567  HA  PRO X 221     225.588 222.851 296.258  1.00  0.00           H
ATOM   3568  C   PRO X 221     223.627 223.570 295.715  1.00  0.00           C
ATOM   3569  O   PRO X 221     223.849 224.780 295.569  1.00  0.00           O
ATOM   3570  N   ILE X 222     222.455 223.092 295.955  1.00  0.00           N
ATOM   3571  H   ILE X 222     222.369 222.086 295.983  1.00  0.00           H
ATOM   3572  CA  ILE X 222     221.227 223.960 296.074  1.00  0.00           C
ATOM   3573  HA  ILE X 222     221.106 224.355 295.065  1.00  0.00           H
ATOM   3574  CB  ILE X 222     219.906 223.210 296.468  1.00  0.00           C
ATOM   3575  HB  ILE X 222     219.787 222.484 295.664  1.00  0.00           H
ATOM   3576  CG2 ILE X 222     220.077 222.468 297.847  1.00  0.00           C
ATOM   3577 HG21 ILE X 222     219.457 221.572 297.842  1.00  0.00           H
ATOM   3578 HG22 ILE X 222     219.750 222.991 298.746  1.00  0.00           H
ATOM   3579 HG23 ILE X 222     221.108 222.148 298.001  1.00  0.00           H
ATOM   3580  CG1 ILE X 222     218.638 224.127 296.602  1.00  0.00           C
ATOM   3581 HG12 ILE X 222     218.801 225.001 297.234  1.00  0.00           H
ATOM   3582 HG13 ILE X 222     218.448 224.554 295.617  1.00  0.00           H
ATOM   3583  CD1 ILE X 222     217.318 223.467 296.915  1.00  0.00           C
ATOM   3584 HD11 ILE X 222     217.256 222.603 296.253  1.00  0.00           H
ATOM   3585 HD12 ILE X 222     217.330 223.183 297.968  1.00  0.00           H
ATOM   3586 HD13 ILE X 222     216.500 224.166 296.743  1.00  0.00           H
ATOM   3587  C   ILE X 222     221.384 225.207 297.025  1.00  0.00           C
ATOM   3588  O   ILE X 222     221.182 226.433 296.670  1.00  0.00           O
ATOM   3589  N   ILE X 223     221.959 224.995 298.205  1.00  0.00           N
ATOM   3590  H   ILE X 223     222.071 224.039 298.512  1.00  0.00           H
ATOM   3591  CA  ILE X 223     222.054 226.118 299.212  1.00  0.00           C
ATOM   3592  HA  ILE X 223     221.180 226.769 299.248  1.00  0.00           H
ATOM   3593  CB  ILE X 223     222.119 225.569 300.639  1.00  0.00           C
ATOM   3594  HB  ILE X 223     222.544 226.392 301.213  1.00  0.00           H
ATOM   3595  CG2 ILE X 223     220.672 225.275 301.201  1.00  0.00           C
ATOM   3596 HG21 ILE X 223     220.769 224.919 302.227  1.00  0.00           H
ATOM   3597 HG22 ILE X 223     220.080 224.572 300.615  1.00  0.00           H
ATOM   3598 HG23 ILE X 223     220.019 226.134 301.358  1.00  0.00           H
ATOM   3599  CG1 ILE X 223     223.083 224.367 300.847  1.00  0.00           C
ATOM   3600 HG12 ILE X 223     222.704 223.477 300.345  1.00  0.00           H
ATOM   3601 HG13 ILE X 223     223.907 224.717 300.225  1.00  0.00           H
ATOM   3602  CD1 ILE X 223     223.726 224.136 302.223  1.00  0.00           C
ATOM   3603 HD11 ILE X 223     222.994 223.704 302.905  1.00  0.00           H
ATOM   3604 HD12 ILE X 223     224.521 223.400 302.098  1.00  0.00           H
ATOM   3605 HD13 ILE X 223     224.158 225.076 302.567  1.00  0.00           H
ATOM   3606  C   ILE X 223     223.241 227.082 298.952  1.00  0.00           C
ATOM   3607  O   ILE X 223     223.244 228.109 299.620  1.00  0.00           O
ATOM   3608  N   ASP X 224     224.079 226.868 297.897  1.00  0.00           N
ATOM   3609  H   ASP X 224     224.026 226.009 297.369  1.00  0.00           H
ATOM   3610  CA  ASP X 224     225.032 227.831 297.386  1.00  0.00           C
ATOM   3611  HA  ASP X 224     225.482 228.360 298.226  1.00  0.00           H
ATOM   3612  CB  ASP X 224     226.079 227.067 296.559  1.00  0.00           C
ATOM   3613  HB2 ASP X 224     225.583 226.690 295.665  1.00  0.00           H
ATOM   3614  HB3 ASP X 224     226.857 227.777 296.280  1.00  0.00           H
ATOM   3615  CG  ASP X 224     226.786 225.857 297.304  1.00  0.00           C
ATOM   3616  OD1 ASP X 224     226.639 225.656 298.543  1.00  0.00           O
ATOM   3617  OD2 ASP X 224     227.295 225.032 296.554  1.00  0.00           O
ATOM   3618  C   ASP X 224     224.308 228.863 296.511  1.00  0.00           C
ATOM   3619  O   ASP X 224     224.667 229.982 296.525  1.00  0.00           O
ATOM   3620  N   TYR X 225     223.268 228.514 295.730  1.00  0.00           N
ATOM   3621  H   TYR X 225     222.872 227.587 295.798  1.00  0.00           H
ATOM   3622  CA  TYR X 225     222.668 229.558 294.820  1.00  0.00           C
ATOM   3623  HA  TYR X 225     223.462 230.181 294.409  1.00  0.00           H
ATOM   3624  CB  TYR X 225     221.813 228.849 293.743  1.00  0.00           C
ATOM   3625  HB2 TYR X 225     221.333 228.149 294.427  1.00  0.00           H
ATOM   3626  HB3 TYR X 225     221.083 229.493 293.253  1.00  0.00           H
ATOM   3627  CG  TYR X 225     222.682 228.148 292.743  1.00  0.00           C
ATOM   3628  CD1 TYR X 225     223.029 226.780 292.750  1.00  0.00           C
ATOM   3629  HD1 TYR X 225     222.662 226.166 293.558  1.00  0.00           H
ATOM   3630  CE1 TYR X 225     223.818 226.250 291.693  1.00  0.00           C
ATOM   3631  HE1 TYR X 225     224.138 225.219 291.675  1.00  0.00           H
ATOM   3632  CZ  TYR X 225     224.174 227.129 290.646  1.00  0.00           C
ATOM   3633  OH  TYR X 225     225.009 226.685 289.672  1.00  0.00           O
ATOM   3634  HH  TYR X 225     225.670 226.273 290.234  1.00  0.00           H
ATOM   3635  CE2 TYR X 225     223.834 228.461 290.636  1.00  0.00           C
ATOM   3636  HE2 TYR X 225     224.184 229.124 289.859  1.00  0.00           H
ATOM   3637  CD2 TYR X 225     223.091 228.996 291.742  1.00  0.00           C
ATOM   3638  HD2 TYR X 225     222.821 230.042 291.726  1.00  0.00           H
ATOM   3639  C   TYR X 225     221.767 230.587 295.586  1.00  0.00           C
ATOM   3640  O   TYR X 225     221.519 231.677 295.023  1.00  0.00           O
ATOM   3641  N   PHE X 226     221.407 230.349 296.832  1.00  0.00           N
ATOM   3642  H   PHE X 226     221.773 229.519 297.277  1.00  0.00           H
ATOM   3643  CA  PHE X 226     220.841 231.319 297.798  1.00  0.00           C
ATOM   3644  HA  PHE X 226     220.074 231.894 297.278  1.00  0.00           H
ATOM   3645  CB  PHE X 226     220.214 230.519 298.903  1.00  0.00           C
ATOM   3646  HB2 PHE X 226     220.943 229.789 299.255  1.00  0.00           H
ATOM   3647  HB3 PHE X 226     220.165 231.222 299.735  1.00  0.00           H
ATOM   3648  CG  PHE X 226     218.909 229.976 298.616  1.00  0.00           C
ATOM   3649  CD1 PHE X 226     218.819 228.699 298.040  1.00  0.00           C
ATOM   3650  HD1 PHE X 226     219.706 228.170 297.723  1.00  0.00           H
ATOM   3651  CE1 PHE X 226     217.626 227.984 297.977  1.00  0.00           C
ATOM   3652  HE1 PHE X 226     217.580 226.961 297.632  1.00  0.00           H
ATOM   3653  CZ  PHE X 226     216.451 228.587 298.303  1.00  0.00           C
ATOM   3654  HZ  PHE X 226     215.539 228.010 298.264  1.00  0.00           H
ATOM   3655  CE2 PHE X 226     216.431 229.872 298.788  1.00  0.00           C
ATOM   3656  HE2 PHE X 226     215.461 230.323 298.932  1.00  0.00           H
ATOM   3657  CD2 PHE X 226     217.681 230.552 299.050  1.00  0.00           C
ATOM   3658  HD2 PHE X 226     217.649 231.544 299.477  1.00  0.00           H
ATOM   3659  C   PHE X 226     221.840 232.391 298.295  1.00  0.00           C
ATOM   3660  O   PHE X 226     222.937 231.974 298.722  1.00  0.00           O
ATOM   3661  N   PRO X 227     221.563 233.663 298.270  1.00  0.00           N
ATOM   3662  CD  PRO X 227     220.541 234.301 297.468  1.00  0.00           C
ATOM   3663  HD2 PRO X 227     219.591 234.468 297.976  1.00  0.00           H
ATOM   3664  HD3 PRO X 227     220.250 233.801 296.545  1.00  0.00           H
ATOM   3665  CG  PRO X 227     221.065 235.652 297.112  1.00  0.00           C
ATOM   3666  HG2 PRO X 227     220.342 236.407 296.803  1.00  0.00           H
ATOM   3667  HG3 PRO X 227     221.646 235.520 296.199  1.00  0.00           H
ATOM   3668  CB  PRO X 227     222.080 236.069 298.133  1.00  0.00           C
ATOM   3669  HB2 PRO X 227     221.531 236.620 298.896  1.00  0.00           H
ATOM   3670  HB3 PRO X 227     222.947 236.604 297.746  1.00  0.00           H
ATOM   3671  CA  PRO X 227     222.546 234.695 298.677  1.00  0.00           C
ATOM   3672  HA  PRO X 227     223.437 234.470 298.091  1.00  0.00           H
ATOM   3673  C   PRO X 227     223.020 234.733 300.119  1.00  0.00           C
ATOM   3674  O   PRO X 227     223.988 235.464 300.339  1.00  0.00           O
ATOM   3675  N   GLY X 228     222.446 234.085 301.107  1.00  0.00           N
ATOM   3676  H   GLY X 228     221.499 233.753 300.990  1.00  0.00           H
ATOM   3677  CA  GLY X 228     223.065 234.067 302.437  1.00  0.00           C
ATOM   3678  HA2 GLY X 228     224.141 233.898 302.404  1.00  0.00           H
ATOM   3679  HA3 GLY X 228     222.794 235.000 302.932  1.00  0.00           H
ATOM   3680  C   GLY X 228     222.567 233.057 303.414  1.00  0.00           C
ATOM   3681  O   GLY X 228     223.025 232.981 304.573  1.00  0.00           O
ATOM   3682  N   THR X 229     221.714 232.106 302.893  1.00  0.00           N
ATOM   3683  H   THR X 229     221.708 232.078 301.883  1.00  0.00           H
ATOM   3684  CA  THR X 229     221.022 231.104 303.701  1.00  0.00           C
ATOM   3685  HA  THR X 229     220.347 231.608 304.392  1.00  0.00           H
ATOM   3686  CB  THR X 229     220.188 230.133 302.788  1.00  0.00           C
ATOM   3687  HB  THR X 229     220.771 229.664 301.995  1.00  0.00           H
ATOM   3688  CG2 THR X 229     219.502 228.963 303.476  1.00  0.00           C
ATOM   3689 HG21 THR X 229     220.212 228.155 303.297  1.00  0.00           H
ATOM   3690 HG22 THR X 229     218.640 228.580 302.930  1.00  0.00           H
ATOM   3691 HG23 THR X 229     219.294 229.224 304.514  1.00  0.00           H
ATOM   3692  OG1 THR X 229     219.067 230.885 302.306  1.00  0.00           O
ATOM   3693  HG1 THR X 229     219.344 231.712 301.904  1.00  0.00           H
ATOM   3694  C   THR X 229     222.055 230.297 304.538  1.00  0.00           C
ATOM   3695  O   THR X 229     221.822 229.822 305.693  1.00  0.00           O
ATOM   3696  N   HIE X 230     223.258 230.014 303.926  1.00  0.00           N
ATOM   3697  H   HIE X 230     223.385 230.199 302.941  1.00  0.00           H
ATOM   3698  CA  HIE X 230     224.293 229.121 304.571  1.00  0.00           C
ATOM   3699  HA  HIE X 230     223.761 228.349 305.127  1.00  0.00           H
ATOM   3700  CB  HIE X 230     225.166 228.461 303.513  1.00  0.00           C
ATOM   3701  HB2 HIE X 230     224.572 227.691 303.023  1.00  0.00           H
ATOM   3702  HB3 HIE X 230     225.369 229.192 302.730  1.00  0.00           H
ATOM   3703  CG  HIE X 230     226.439 227.813 303.936  1.00  0.00           C
ATOM   3704  ND1 HIE X 230     227.541 228.494 304.325  1.00  0.00           N
ATOM   3705  CE1 HIE X 230     228.588 227.644 304.464  1.00  0.00           C
ATOM   3706  HE1 HIE X 230     229.624 227.879 304.658  1.00  0.00           H
ATOM   3707  NE2 HIE X 230     228.169 226.437 304.097  1.00  0.00           N
ATOM   3708  HE2 HIE X 230     228.683 225.575 303.987  1.00  0.00           H
ATOM   3709  CD2 HIE X 230     226.791 226.491 303.902  1.00  0.00           C
ATOM   3710  HD2 HIE X 230     226.137 225.655 303.705  1.00  0.00           H
ATOM   3711  C   HIE X 230     225.069 230.032 305.636  1.00  0.00           C
ATOM   3712  O   HIE X 230     225.178 229.621 306.766  1.00  0.00           O
ATOM   3713  N   ASN X 231     225.541 231.197 305.248  1.00  0.00           N
ATOM   3714  H   ASN X 231     225.373 231.443 304.283  1.00  0.00           H
ATOM   3715  CA  ASN X 231     226.348 232.024 306.111  1.00  0.00           C
ATOM   3716  HA  ASN X 231     227.107 231.343 306.497  1.00  0.00           H
ATOM   3717  CB  ASN X 231     226.921 233.116 305.252  1.00  0.00           C
ATOM   3718  HB2 ASN X 231     226.947 232.868 304.191  1.00  0.00           H
ATOM   3719  HB3 ASN X 231     226.290 233.999 305.354  1.00  0.00           H
ATOM   3720  CG  ASN X 231     228.371 233.385 305.606  1.00  0.00           C
ATOM   3721  OD1 ASN X 231     229.227 233.572 304.766  1.00  0.00           O
ATOM   3722  ND2 ASN X 231     228.756 233.440 306.868  1.00  0.00           N
ATOM   3723 HD21 ASN X 231     229.689 233.638 307.199  1.00  0.00           H
ATOM   3724 HD22 ASN X 231     228.058 233.268 307.577  1.00  0.00           H
ATOM   3725  C   ASN X 231     225.583 232.689 307.319  1.00  0.00           C
ATOM   3726  O   ASN X 231     226.247 233.057 308.298  1.00  0.00           O
ATOM   3727  N   LYS X 232     224.208 232.706 307.217  1.00  0.00           N
ATOM   3728  H   LYS X 232     223.879 232.625 306.266  1.00  0.00           H
ATOM   3729  CA  LYS X 232     223.177 233.237 308.199  1.00  0.00           C
ATOM   3730  HA  LYS X 232     223.571 234.198 308.531  1.00  0.00           H
ATOM   3731  CB  LYS X 232     221.819 233.563 307.561  1.00  0.00           C
ATOM   3732  HB2 LYS X 232     221.998 234.266 306.747  1.00  0.00           H
ATOM   3733  HB3 LYS X 232     221.419 232.630 307.166  1.00  0.00           H
ATOM   3734  CG  LYS X 232     220.769 234.140 308.532  1.00  0.00           C
ATOM   3735  HG2 LYS X 232     220.454 233.363 309.229  1.00  0.00           H
ATOM   3736  HG3 LYS X 232     221.147 234.936 309.173  1.00  0.00           H
ATOM   3737  CD  LYS X 232     219.574 234.522 307.675  1.00  0.00           C
ATOM   3738  HD2 LYS X 232     219.884 235.213 306.891  1.00  0.00           H
ATOM   3739  HD3 LYS X 232     219.272 233.630 307.126  1.00  0.00           H
ATOM   3740  CE  LYS X 232     218.413 235.067 308.484  1.00  0.00           C
ATOM   3741  HE2 LYS X 232     218.134 234.446 309.336  1.00  0.00           H
ATOM   3742  HE3 LYS X 232     218.696 236.069 308.804  1.00  0.00           H
ATOM   3743  NZ  LYS X 232     217.281 235.210 307.577  1.00  0.00           N
ATOM   3744  HZ1 LYS X 232     216.513 235.569 308.126  1.00  0.00           H
ATOM   3745  HZ2 LYS X 232     216.971 234.340 307.169  1.00  0.00           H
ATOM   3746  HZ3 LYS X 232     217.472 235.873 306.839  1.00  0.00           H
ATOM   3747  C   LYS X 232     223.035 232.250 309.416  1.00  0.00           C
ATOM   3748  O   LYS X 232     223.219 232.661 310.578  1.00  0.00           O
ATOM   3749  N   LEU X 233     223.051 230.945 309.126  1.00  0.00           N
ATOM   3750  H   LEU X 233     222.994 230.600 308.178  1.00  0.00           H
ATOM   3751  CA  LEU X 233     223.218 229.828 309.980  1.00  0.00           C
ATOM   3752  HA  LEU X 233     222.484 230.083 310.745  1.00  0.00           H
ATOM   3753  CB  LEU X 233     222.864 228.401 309.382  1.00  0.00           C
ATOM   3754  HB2 LEU X 233     221.847 228.477 308.995  1.00  0.00           H
ATOM   3755  HB3 LEU X 233     223.513 228.346 308.508  1.00  0.00           H
ATOM   3756  CG  LEU X 233     223.022 227.231 310.376  1.00  0.00           C
ATOM   3757  HG  LEU X 233     224.017 227.207 310.821  1.00  0.00           H
ATOM   3758  CD1 LEU X 233     222.073 227.337 311.531  1.00  0.00           C
ATOM   3759 HD11 LEU X 233     222.056 226.400 312.088  1.00  0.00           H
ATOM   3760 HD12 LEU X 233     222.448 228.039 312.275  1.00  0.00           H
ATOM   3761 HD13 LEU X 233     221.129 227.652 311.086  1.00  0.00           H
ATOM   3762  CD2 LEU X 233     222.784 225.892 309.633  1.00  0.00           C
ATOM   3763 HD21 LEU X 233     221.732 225.804 309.361  1.00  0.00           H
ATOM   3764 HD22 LEU X 233     223.476 225.911 308.791  1.00  0.00           H
ATOM   3765 HD23 LEU X 233     223.048 225.010 310.217  1.00  0.00           H
ATOM   3766  C   LEU X 233     224.632 229.807 310.739  1.00  0.00           C
ATOM   3767  O   LEU X 233     224.639 229.637 311.959  1.00  0.00           O
ATOM   3768  N   LEU X 234     225.695 229.995 309.956  1.00  0.00           N
ATOM   3769  H   LEU X 234     225.644 229.988 308.947  1.00  0.00           H
ATOM   3770  CA  LEU X 234     227.069 230.016 310.503  1.00  0.00           C
ATOM   3771  HA  LEU X 234     227.248 229.117 311.093  1.00  0.00           H
ATOM   3772  CB  LEU X 234     228.066 230.070 309.319  1.00  0.00           C
ATOM   3773  HB2 LEU X 234     227.904 231.033 308.834  1.00  0.00           H
ATOM   3774  HB3 LEU X 234     228.974 230.268 309.888  1.00  0.00           H
ATOM   3775  CG  LEU X 234     228.361 228.826 308.388  1.00  0.00           C
ATOM   3776  HG  LEU X 234     227.490 228.511 307.813  1.00  0.00           H
ATOM   3777  CD1 LEU X 234     229.499 229.381 307.480  1.00  0.00           C
ATOM   3778 HD11 LEU X 234     230.371 229.632 308.083  1.00  0.00           H
ATOM   3779 HD12 LEU X 234     229.928 228.621 306.826  1.00  0.00           H
ATOM   3780 HD13 LEU X 234     229.097 230.253 306.964  1.00  0.00           H
ATOM   3781  CD2 LEU X 234     228.837 227.666 309.242  1.00  0.00           C
ATOM   3782 HD21 LEU X 234     229.672 227.871 309.913  1.00  0.00           H
ATOM   3783 HD22 LEU X 234     227.982 227.315 309.819  1.00  0.00           H
ATOM   3784 HD23 LEU X 234     229.052 226.767 308.665  1.00  0.00           H
ATOM   3785  C   LEU X 234     227.197 231.129 311.545  1.00  0.00           C
ATOM   3786  O   LEU X 234     227.885 230.988 312.558  1.00  0.00           O
ATOM   3787  N   LYS X 235     226.584 232.331 311.147  1.00  0.00           N
ATOM   3788  H   LYS X 235     226.294 232.306 310.180  1.00  0.00           H
ATOM   3789  CA  LYS X 235     226.505 233.552 311.952  1.00  0.00           C
ATOM   3790  HA  LYS X 235     227.477 233.747 312.404  1.00  0.00           H
ATOM   3791  CB  LYS X 235     226.232 234.893 311.180  1.00  0.00           C
ATOM   3792  HB2 LYS X 235     225.402 234.797 310.480  1.00  0.00           H
ATOM   3793  HB3 LYS X 235     225.883 235.617 311.916  1.00  0.00           H
ATOM   3794  CG  LYS X 235     227.495 235.327 310.363  1.00  0.00           C
ATOM   3795  HG2 LYS X 235     228.318 235.570 311.034  1.00  0.00           H
ATOM   3796  HG3 LYS X 235     227.852 234.502 309.747  1.00  0.00           H
ATOM   3797  CD  LYS X 235     227.151 236.541 309.430  1.00  0.00           C
ATOM   3798  HD2 LYS X 235     226.522 236.106 308.654  1.00  0.00           H
ATOM   3799  HD3 LYS X 235     226.691 237.381 309.951  1.00  0.00           H
ATOM   3800  CE  LYS X 235     228.405 237.084 308.860  1.00  0.00           C
ATOM   3801  HE2 LYS X 235     229.015 237.516 309.653  1.00  0.00           H
ATOM   3802  HE3 LYS X 235     228.914 236.263 308.354  1.00  0.00           H
ATOM   3803  NZ  LYS X 235     228.063 238.141 307.894  1.00  0.00           N
ATOM   3804  HZ1 LYS X 235     228.901 238.395 307.392  1.00  0.00           H
ATOM   3805  HZ2 LYS X 235     227.561 238.905 308.324  1.00  0.00           H
ATOM   3806  HZ3 LYS X 235     227.447 237.698 307.228  1.00  0.00           H
ATOM   3807  C   LYS X 235     225.608 233.413 313.239  1.00  0.00           C
ATOM   3808  O   LYS X 235     225.944 233.930 314.295  1.00  0.00           O
ATOM   3809  N   ASN X 236     224.476 232.736 313.073  1.00  0.00           N
ATOM   3810  H   ASN X 236     224.391 232.352 312.142  1.00  0.00           H
ATOM   3811  CA  ASN X 236     223.476 232.427 314.116  1.00  0.00           C
ATOM   3812  HA  ASN X 236     223.346 233.283 314.778  1.00  0.00           H
ATOM   3813  CB  ASN X 236     222.165 232.031 313.427  1.00  0.00           C
ATOM   3814  HB2 ASN X 236     222.388 231.420 312.552  1.00  0.00           H
ATOM   3815  HB3 ASN X 236     221.668 231.337 314.106  1.00  0.00           H
ATOM   3816  CG  ASN X 236     221.177 233.141 313.026  1.00  0.00           C
ATOM   3817  OD1 ASN X 236     219.981 233.063 313.151  1.00  0.00           O
ATOM   3818  ND2 ASN X 236     221.697 234.197 312.328  1.00  0.00           N
ATOM   3819 HD21 ASN X 236     221.039 234.900 312.023  1.00  0.00           H
ATOM   3820 HD22 ASN X 236     222.682 234.154 312.112  1.00  0.00           H
ATOM   3821  C   ASN X 236     223.881 231.222 315.023  1.00  0.00           C
ATOM   3822  O   ASN X 236     223.521 231.193 316.200  1.00  0.00           O
ATOM   3823  N   VAL X 237     224.771 230.334 314.591  1.00  0.00           N
ATOM   3824  H   VAL X 237     225.164 230.216 313.668  1.00  0.00           H
ATOM   3825  CA  VAL X 237     225.525 229.513 315.546  1.00  0.00           C
ATOM   3826  HA  VAL X 237     224.821 228.996 316.198  1.00  0.00           H
ATOM   3827  CB  VAL X 237     226.352 228.494 314.738  1.00  0.00           C
ATOM   3828  HB  VAL X 237     226.903 228.932 313.906  1.00  0.00           H
ATOM   3829  CG1 VAL X 237     227.421 227.870 315.643  1.00  0.00           C
ATOM   3830 HG11 VAL X 237     227.025 227.589 316.618  1.00  0.00           H
ATOM   3831 HG12 VAL X 237     227.813 226.991 315.131  1.00  0.00           H
ATOM   3832 HG13 VAL X 237     228.158 228.628 315.911  1.00  0.00           H
ATOM   3833  CG2 VAL X 237     225.378 227.389 314.245  1.00  0.00           C
ATOM   3834 HG21 VAL X 237     225.003 226.779 315.067  1.00  0.00           H
ATOM   3835 HG22 VAL X 237     225.888 226.739 313.534  1.00  0.00           H
ATOM   3836 HG23 VAL X 237     224.483 227.679 313.694  1.00  0.00           H
ATOM   3837  C   VAL X 237     226.466 230.396 316.438  1.00  0.00           C
ATOM   3838  O   VAL X 237     226.718 230.011 317.583  1.00  0.00           O
ATOM   3839  N   ALA X 238     227.133 231.360 315.844  1.00  0.00           N
ATOM   3840  H   ALA X 238     226.988 231.368 314.844  1.00  0.00           H
ATOM   3841  CA  ALA X 238     228.050 232.325 316.492  1.00  0.00           C
ATOM   3842  HA  ALA X 238     228.750 231.777 317.123  1.00  0.00           H
ATOM   3843  CB  ALA X 238     228.902 233.053 315.416  1.00  0.00           C
ATOM   3844  HB1 ALA X 238     228.269 233.538 314.673  1.00  0.00           H
ATOM   3845  HB2 ALA X 238     229.566 232.369 314.888  1.00  0.00           H
ATOM   3846  HB3 ALA X 238     229.482 233.768 316.000  1.00  0.00           H
ATOM   3847  C   ALA X 238     227.291 233.305 317.442  1.00  0.00           C
ATOM   3848  O   ALA X 238     227.804 233.631 318.476  1.00  0.00           O
ATOM   3849  N   PHE X 239     225.984 233.579 317.193  1.00  0.00           N
ATOM   3850  H   PHE X 239     225.511 233.249 316.364  1.00  0.00           H
ATOM   3851  CA  PHE X 239     225.050 234.197 318.092  1.00  0.00           C
ATOM   3852  HA  PHE X 239     225.423 235.193 318.327  1.00  0.00           H
ATOM   3853  CB  PHE X 239     223.658 234.347 317.396  1.00  0.00           C
ATOM   3854  HB2 PHE X 239     223.710 235.016 316.537  1.00  0.00           H
ATOM   3855  HB3 PHE X 239     223.325 233.405 316.959  1.00  0.00           H
ATOM   3856  CG  PHE X 239     222.597 234.811 318.311  1.00  0.00           C
ATOM   3857  CD1 PHE X 239     222.505 236.131 318.767  1.00  0.00           C
ATOM   3858  HD1 PHE X 239     223.133 236.931 318.402  1.00  0.00           H
ATOM   3859  CE1 PHE X 239     221.478 236.534 319.649  1.00  0.00           C
ATOM   3860  HE1 PHE X 239     221.323 237.564 319.935  1.00  0.00           H
ATOM   3861  CZ  PHE X 239     220.569 235.571 320.120  1.00  0.00           C
ATOM   3862  HZ  PHE X 239     219.831 235.889 320.842  1.00  0.00           H
ATOM   3863  CE2 PHE X 239     220.570 234.261 319.621  1.00  0.00           C
ATOM   3864  HE2 PHE X 239     219.751 233.573 319.775  1.00  0.00           H
ATOM   3865  CD2 PHE X 239     221.560 233.939 318.686  1.00  0.00           C
ATOM   3866  HD2 PHE X 239     221.573 232.953 318.245  1.00  0.00           H
ATOM   3867  C   PHE X 239     224.955 233.234 319.342  1.00  0.00           C
ATOM   3868  O   PHE X 239     225.015 233.823 320.456  1.00  0.00           O
ATOM   3869  N   MET X 240     224.812 231.922 319.266  1.00  0.00           N
ATOM   3870  H   MET X 240     224.823 231.542 318.331  1.00  0.00           H
ATOM   3871  CA  MET X 240     224.829 231.001 320.338  1.00  0.00           C
ATOM   3872  HA  MET X 240     224.153 231.478 321.046  1.00  0.00           H
ATOM   3873  CB  MET X 240     224.257 229.652 319.835  1.00  0.00           C
ATOM   3874  HB2 MET X 240     224.481 229.453 318.787  1.00  0.00           H
ATOM   3875  HB3 MET X 240     224.778 228.874 320.393  1.00  0.00           H
ATOM   3876  CG  MET X 240     222.760 229.451 320.056  1.00  0.00           C
ATOM   3877  HG2 MET X 240     222.267 230.190 319.424  1.00  0.00           H
ATOM   3878  HG3 MET X 240     222.549 228.492 319.584  1.00  0.00           H
ATOM   3879  SD  MET X 240     222.094 229.637 321.713  1.00  0.00           S
ATOM   3880  CE  MET X 240     220.726 230.739 321.369  1.00  0.00           C
ATOM   3881  HE1 MET X 240     221.038 231.722 321.015  1.00  0.00           H
ATOM   3882  HE2 MET X 240     220.025 230.201 320.731  1.00  0.00           H
ATOM   3883  HE3 MET X 240     220.361 230.983 322.366  1.00  0.00           H
ATOM   3884  C   MET X 240     226.108 230.704 321.034  1.00  0.00           C
ATOM   3885  O   MET X 240     226.106 230.591 322.276  1.00  0.00           O
ATOM   3886  N   LYS X 241     227.266 230.739 320.358  1.00  0.00           N
ATOM   3887  H   LYS X 241     227.183 230.635 319.357  1.00  0.00           H
ATOM   3888  CA  LYS X 241     228.557 230.763 320.920  1.00  0.00           C
ATOM   3889  HA  LYS X 241     228.723 229.888 321.549  1.00  0.00           H
ATOM   3890  CB  LYS X 241     229.665 230.899 319.868  1.00  0.00           C
ATOM   3891  HB2 LYS X 241     229.592 230.090 319.141  1.00  0.00           H
ATOM   3892  HB3 LYS X 241     229.688 231.831 319.303  1.00  0.00           H
ATOM   3893  CG  LYS X 241     231.033 230.881 320.578  1.00  0.00           C
ATOM   3894  HG2 LYS X 241     231.233 231.749 321.206  1.00  0.00           H
ATOM   3895  HG3 LYS X 241     231.159 229.942 321.117  1.00  0.00           H
ATOM   3896  CD  LYS X 241     232.214 230.899 319.541  1.00  0.00           C
ATOM   3897  HD2 LYS X 241     232.134 230.146 318.757  1.00  0.00           H
ATOM   3898  HD3 LYS X 241     232.043 231.865 319.066  1.00  0.00           H
ATOM   3899  CE  LYS X 241     233.606 230.777 320.159  1.00  0.00           C
ATOM   3900  HE2 LYS X 241     234.334 231.118 319.424  1.00  0.00           H
ATOM   3901  HE3 LYS X 241     233.772 231.429 321.017  1.00  0.00           H
ATOM   3902  NZ  LYS X 241     233.775 229.397 320.663  1.00  0.00           N
ATOM   3903  HZ1 LYS X 241     234.654 229.246 321.136  1.00  0.00           H
ATOM   3904  HZ2 LYS X 241     233.852 228.743 319.898  1.00  0.00           H
ATOM   3905  HZ3 LYS X 241     233.063 229.039 321.283  1.00  0.00           H
ATOM   3906  C   LYS X 241     228.637 231.935 321.861  1.00  0.00           C
ATOM   3907  O   LYS X 241     228.860 231.760 323.075  1.00  0.00           O
ATOM   3908  N   SER X 242     228.322 233.187 321.432  1.00  0.00           N
ATOM   3909  H   SER X 242     228.192 233.314 320.438  1.00  0.00           H
ATOM   3910  CA  SER X 242     228.274 234.378 322.300  1.00  0.00           C
ATOM   3911  HA  SER X 242     229.264 234.505 322.738  1.00  0.00           H
ATOM   3912  CB  SER X 242     228.032 235.635 321.522  1.00  0.00           C
ATOM   3913  HB2 SER X 242     228.780 235.643 320.729  1.00  0.00           H
ATOM   3914  HB3 SER X 242     227.033 235.623 321.084  1.00  0.00           H
ATOM   3915  OG  SER X 242     228.121 236.741 322.416  1.00  0.00           O
ATOM   3916  HG  SER X 242     228.282 237.541 321.909  1.00  0.00           H
ATOM   3917  C   SER X 242     227.317 234.262 323.502  1.00  0.00           C
ATOM   3918  O   SER X 242     227.681 234.675 324.641  1.00  0.00           O
ATOM   3919  N   TYR X 243     226.147 233.703 323.221  1.00  0.00           N
ATOM   3920  H   TYR X 243     225.952 233.591 322.237  1.00  0.00           H
ATOM   3921  CA  TYR X 243     225.095 233.394 324.138  1.00  0.00           C
ATOM   3922  HA  TYR X 243     224.837 234.343 324.607  1.00  0.00           H
ATOM   3923  CB  TYR X 243     223.841 232.835 323.509  1.00  0.00           C
ATOM   3924  HB2 TYR X 243     223.606 233.455 322.644  1.00  0.00           H
ATOM   3925  HB3 TYR X 243     223.976 231.798 323.201  1.00  0.00           H
ATOM   3926  CG  TYR X 243     222.586 232.886 324.431  1.00  0.00           C
ATOM   3927  CD1 TYR X 243     222.046 231.687 325.054  1.00  0.00           C
ATOM   3928  HD1 TYR X 243     222.518 230.716 325.010  1.00  0.00           H
ATOM   3929  CE1 TYR X 243     220.939 231.817 325.901  1.00  0.00           C
ATOM   3930  HE1 TYR X 243     220.550 231.036 326.537  1.00  0.00           H
ATOM   3931  CZ  TYR X 243     220.285 233.078 325.988  1.00  0.00           C
ATOM   3932  OH  TYR X 243     219.115 233.137 326.774  1.00  0.00           O
ATOM   3933  HH  TYR X 243     219.236 232.624 327.577  1.00  0.00           H
ATOM   3934  CE2 TYR X 243     220.704 234.280 325.303  1.00  0.00           C
ATOM   3935  HE2 TYR X 243     220.079 235.160 325.293  1.00  0.00           H
ATOM   3936  CD2 TYR X 243     221.882 234.154 324.525  1.00  0.00           C
ATOM   3937  HD2 TYR X 243     222.130 235.046 323.968  1.00  0.00           H
ATOM   3938  C   TYR X 243     225.632 232.587 325.260  1.00  0.00           C
ATOM   3939  O   TYR X 243     225.392 232.891 326.461  1.00  0.00           O
ATOM   3940  N   ILE X 244     226.529 231.601 324.959  1.00  0.00           N
ATOM   3941  H   ILE X 244     226.902 231.549 324.022  1.00  0.00           H
ATOM   3942  CA  ILE X 244     227.246 230.778 325.947  1.00  0.00           C
ATOM   3943  HA  ILE X 244     226.477 230.581 326.694  1.00  0.00           H
ATOM   3944  CB  ILE X 244     227.837 229.520 325.300  1.00  0.00           C
ATOM   3945  HB  ILE X 244     228.326 229.751 324.354  1.00  0.00           H
ATOM   3946  CG2 ILE X 244     228.777 228.667 326.214  1.00  0.00           C
ATOM   3947 HG21 ILE X 244     229.217 227.892 325.586  1.00  0.00           H
ATOM   3948 HG22 ILE X 244     228.238 228.349 327.107  1.00  0.00           H
ATOM   3949 HG23 ILE X 244     229.585 229.308 326.568  1.00  0.00           H
ATOM   3950  CG1 ILE X 244     226.689 228.591 324.845  1.00  0.00           C
ATOM   3951 HG12 ILE X 244     226.006 229.203 324.256  1.00  0.00           H
ATOM   3952 HG13 ILE X 244     227.150 227.891 324.148  1.00  0.00           H
ATOM   3953  CD1 ILE X 244     225.809 227.779 325.911  1.00  0.00           C
ATOM   3954 HD11 ILE X 244     226.355 226.911 326.282  1.00  0.00           H
ATOM   3955 HD12 ILE X 244     225.541 228.396 326.768  1.00  0.00           H
ATOM   3956 HD13 ILE X 244     224.908 227.379 325.447  1.00  0.00           H
ATOM   3957  C   ILE X 244     228.400 231.612 326.637  1.00  0.00           C
ATOM   3958  O   ILE X 244     228.594 231.663 327.846  1.00  0.00           O
ATOM   3959  N   LEU X 245     229.203 232.334 325.877  1.00  0.00           N
ATOM   3960  H   LEU X 245     229.069 232.091 324.905  1.00  0.00           H
ATOM   3961  CA  LEU X 245     230.506 232.939 326.390  1.00  0.00           C
ATOM   3962  HA  LEU X 245     230.938 232.205 327.070  1.00  0.00           H
ATOM   3963  CB  LEU X 245     231.576 233.285 325.335  1.00  0.00           C
ATOM   3964  HB2 LEU X 245     231.102 233.975 324.636  1.00  0.00           H
ATOM   3965  HB3 LEU X 245     232.427 233.750 325.833  1.00  0.00           H
ATOM   3966  CG  LEU X 245     232.103 232.049 324.506  1.00  0.00           C
ATOM   3967  HG  LEU X 245     231.274 231.690 323.896  1.00  0.00           H
ATOM   3968  CD1 LEU X 245     233.271 232.520 323.586  1.00  0.00           C
ATOM   3969 HD11 LEU X 245     234.102 232.946 324.148  1.00  0.00           H
ATOM   3970 HD12 LEU X 245     233.657 231.775 322.890  1.00  0.00           H
ATOM   3971 HD13 LEU X 245     232.952 233.308 322.904  1.00  0.00           H
ATOM   3972  CD2 LEU X 245     232.440 230.940 325.476  1.00  0.00           C
ATOM   3973 HD21 LEU X 245     231.528 230.410 325.748  1.00  0.00           H
ATOM   3974 HD22 LEU X 245     233.046 230.269 324.868  1.00  0.00           H
ATOM   3975 HD23 LEU X 245     233.125 231.274 326.256  1.00  0.00           H
ATOM   3976  C   LEU X 245     230.205 234.125 327.268  1.00  0.00           C
ATOM   3977  O   LEU X 245     230.895 234.378 328.265  1.00  0.00           O
ATOM   3978  N   GLU X 246     229.052 234.779 327.097  1.00  0.00           N
ATOM   3979  H   GLU X 246     228.618 234.753 326.185  1.00  0.00           H
ATOM   3980  CA  GLU X 246     228.445 235.619 328.076  1.00  0.00           C
ATOM   3981  HA  GLU X 246     229.200 236.322 328.430  1.00  0.00           H
ATOM   3982  CB  GLU X 246     227.265 236.250 327.344  1.00  0.00           C
ATOM   3983  HB2 GLU X 246     227.540 236.920 326.529  1.00  0.00           H
ATOM   3984  HB3 GLU X 246     226.536 235.490 327.064  1.00  0.00           H
ATOM   3985  CG  GLU X 246     226.538 237.258 328.339  1.00  0.00           C
ATOM   3986  HG2 GLU X 246     225.617 237.423 327.779  1.00  0.00           H
ATOM   3987  HG3 GLU X 246     226.301 236.793 329.296  1.00  0.00           H
ATOM   3988  CD  GLU X 246     227.027 238.647 328.623  1.00  0.00           C
ATOM   3989  OE1 GLU X 246     228.206 238.941 328.431  1.00  0.00           O
ATOM   3990  OE2 GLU X 246     226.277 239.487 329.264  1.00  0.00           O
ATOM   3991  C   GLU X 246     228.103 234.955 329.475  1.00  0.00           C
ATOM   3992  O   GLU X 246     228.538 235.506 330.524  1.00  0.00           O
ATOM   3993  N   LYS X 247     227.579 233.748 329.532  1.00  0.00           N
ATOM   3994  H   LYS X 247     227.308 233.341 328.649  1.00  0.00           H
ATOM   3995  CA  LYS X 247     227.258 233.139 330.773  1.00  0.00           C
ATOM   3996  HA  LYS X 247     226.902 233.891 331.477  1.00  0.00           H
ATOM   3997  CB  LYS X 247     226.255 232.058 330.450  1.00  0.00           C
ATOM   3998  HB2 LYS X 247     225.503 232.512 329.805  1.00  0.00           H
ATOM   3999  HB3 LYS X 247     226.728 231.354 329.765  1.00  0.00           H
ATOM   4000  CG  LYS X 247     225.523 231.381 331.623  1.00  0.00           C
ATOM   4001  HG2 LYS X 247     224.743 230.794 331.139  1.00  0.00           H
ATOM   4002  HG3 LYS X 247     226.281 230.773 332.116  1.00  0.00           H
ATOM   4003  CD  LYS X 247     224.995 232.317 332.742  1.00  0.00           C
ATOM   4004  HD2 LYS X 247     225.749 232.986 333.155  1.00  0.00           H
ATOM   4005  HD3 LYS X 247     224.254 232.927 332.225  1.00  0.00           H
ATOM   4006  CE  LYS X 247     224.363 231.515 333.825  1.00  0.00           C
ATOM   4007  HE2 LYS X 247     223.608 230.888 333.351  1.00  0.00           H
ATOM   4008  HE3 LYS X 247     225.184 230.951 334.268  1.00  0.00           H
ATOM   4009  NZ  LYS X 247     223.784 232.359 334.912  1.00  0.00           N
ATOM   4010  HZ1 LYS X 247     223.106 232.986 334.502  1.00  0.00           H
ATOM   4011  HZ2 LYS X 247     224.381 233.017 335.393  1.00  0.00           H
ATOM   4012  HZ3 LYS X 247     223.377 231.929 335.731  1.00  0.00           H
ATOM   4013  C   LYS X 247     228.530 232.570 331.428  1.00  0.00           C
ATOM   4014  O   LYS X 247     228.513 232.540 332.638  1.00  0.00           O
ATOM   4015  N   VAL X 248     229.491 232.105 330.622  1.00  0.00           N
ATOM   4016  H   VAL X 248     229.294 232.212 329.637  1.00  0.00           H
ATOM   4017  CA  VAL X 248     230.743 231.572 331.082  1.00  0.00           C
ATOM   4018  HA  VAL X 248     230.467 230.863 331.862  1.00  0.00           H
ATOM   4019  CB  VAL X 248     231.458 230.764 329.991  1.00  0.00           C
ATOM   4020  HB  VAL X 248     231.414 231.444 329.140  1.00  0.00           H
ATOM   4021  CG1 VAL X 248     232.963 230.395 330.206  1.00  0.00           C
ATOM   4022 HG11 VAL X 248     233.011 229.492 330.815  1.00  0.00           H
ATOM   4023 HG12 VAL X 248     233.415 230.029 329.284  1.00  0.00           H
ATOM   4024 HG13 VAL X 248     233.595 231.080 330.771  1.00  0.00           H
ATOM   4025  CG2 VAL X 248     230.615 229.469 329.685  1.00  0.00           C
ATOM   4026 HG21 VAL X 248     230.876 228.913 328.784  1.00  0.00           H
ATOM   4027 HG22 VAL X 248     229.557 229.733 329.665  1.00  0.00           H
ATOM   4028 HG23 VAL X 248     230.896 228.795 330.494  1.00  0.00           H
ATOM   4029  C   VAL X 248     231.564 232.693 331.690  1.00  0.00           C
ATOM   4030  O   VAL X 248     232.076 232.478 332.785  1.00  0.00           O
ATOM   4031  N   LYS X 249     231.598 233.852 331.056  1.00  0.00           N
ATOM   4032  H   LYS X 249     231.337 233.888 330.081  1.00  0.00           H
ATOM   4033  CA  LYS X 249     232.116 235.128 331.623  1.00  0.00           C
ATOM   4034  HA  LYS X 249     233.182 234.973 331.791  1.00  0.00           H
ATOM   4035  CB  LYS X 249     232.027 236.261 330.545  1.00  0.00           C
ATOM   4036  HB2 LYS X 249     232.472 235.960 329.597  1.00  0.00           H
ATOM   4037  HB3 LYS X 249     230.969 236.477 330.397  1.00  0.00           H
ATOM   4038  CG  LYS X 249     232.668 237.507 331.083  1.00  0.00           C
ATOM   4039  HG2 LYS X 249     232.153 237.794 332.001  1.00  0.00           H
ATOM   4040  HG3 LYS X 249     233.724 237.408 331.335  1.00  0.00           H
ATOM   4041  CD  LYS X 249     232.599 238.621 330.036  1.00  0.00           C
ATOM   4042  HD2 LYS X 249     233.098 239.484 330.477  1.00  0.00           H
ATOM   4043  HD3 LYS X 249     233.283 238.281 329.259  1.00  0.00           H
ATOM   4044  CE  LYS X 249     231.206 238.991 329.385  1.00  0.00           C
ATOM   4045  HE2 LYS X 249     231.512 239.610 328.541  1.00  0.00           H
ATOM   4046  HE3 LYS X 249     230.848 238.042 328.987  1.00  0.00           H
ATOM   4047  NZ  LYS X 249     230.151 239.513 330.282  1.00  0.00           N
ATOM   4048  HZ1 LYS X 249     229.224 239.705 329.929  1.00  0.00           H
ATOM   4049  HZ2 LYS X 249     230.403 240.394 330.708  1.00  0.00           H
ATOM   4050  HZ3 LYS X 249     230.087 238.881 331.067  1.00  0.00           H
ATOM   4051  C   LYS X 249     231.466 235.397 333.000  1.00  0.00           C
ATOM   4052  O   LYS X 249     232.189 235.783 333.901  1.00  0.00           O
ATOM   4053  N   GLU X 250     230.133 235.188 333.225  1.00  0.00           N
ATOM   4054  H   GLU X 250     229.567 234.737 332.520  1.00  0.00           H
ATOM   4055  CA  GLU X 250     229.648 235.373 334.557  1.00  0.00           C
ATOM   4056  HA  GLU X 250     230.032 236.347 334.862  1.00  0.00           H
ATOM   4057  CB  GLU X 250     228.092 235.435 334.426  1.00  0.00           C
ATOM   4058  HB2 GLU X 250     227.846 236.381 333.945  1.00  0.00           H
ATOM   4059  HB3 GLU X 250     227.797 234.661 333.717  1.00  0.00           H
ATOM   4060  CG  GLU X 250     227.366 235.400 335.765  1.00  0.00           C
ATOM   4061  HG2 GLU X 250     227.871 234.688 336.417  1.00  0.00           H
ATOM   4062  HG3 GLU X 250     227.354 236.430 336.121  1.00  0.00           H
ATOM   4063  CD  GLU X 250     225.978 234.888 335.465  1.00  0.00           C
ATOM   4064  OE1 GLU X 250     225.474 235.100 334.352  1.00  0.00           O
ATOM   4065  OE2 GLU X 250     225.429 234.089 336.265  1.00  0.00           O
ATOM   4066  C   GLU X 250     230.146 234.332 335.558  1.00  0.00           C
ATOM   4067  O   GLU X 250     230.690 234.724 336.572  1.00  0.00           O
ATOM   4068  N   HIE X 251     230.113 233.034 335.191  1.00  0.00           N
ATOM   4069  H   HIE X 251     229.629 232.830 334.328  1.00  0.00           H
ATOM   4070  CA  HIE X 251     230.702 231.956 335.912  1.00  0.00           C
ATOM   4071  HA  HIE X 251     230.402 232.201 336.931  1.00  0.00           H
ATOM   4072  CB  HIE X 251     230.165 230.627 335.299  1.00  0.00           C
ATOM   4073  HB2 HIE X 251     230.184 230.636 334.209  1.00  0.00           H
ATOM   4074  HB3 HIE X 251     230.666 229.758 335.725  1.00  0.00           H
ATOM   4075  CG  HIE X 251     228.690 230.574 335.631  1.00  0.00           C
ATOM   4076  ND1 HIE X 251     228.087 230.792 336.896  1.00  0.00           N
ATOM   4077  CE1 HIE X 251     226.822 230.365 336.725  1.00  0.00           C
ATOM   4078  HE1 HIE X 251     226.059 230.195 337.471  1.00  0.00           H
ATOM   4079  NE2 HIE X 251     226.664 229.775 335.485  1.00  0.00           N
ATOM   4080  HE2 HIE X 251     225.886 229.181 335.238  1.00  0.00           H
ATOM   4081  CD2 HIE X 251     227.857 229.866 334.854  1.00  0.00           C
ATOM   4082  HD2 HIE X 251     228.035 229.479 333.862  1.00  0.00           H
ATOM   4083  C   HIE X 251     232.256 231.946 336.115  1.00  0.00           C
ATOM   4084  O   HIE X 251     232.810 231.235 337.010  1.00  0.00           O
ATOM   4085  N   GLN X 252     233.066 232.803 335.431  1.00  0.00           N
ATOM   4086  H   GLN X 252     232.636 233.404 334.743  1.00  0.00           H
ATOM   4087  CA  GLN X 252     234.536 232.853 335.574  1.00  0.00           C
ATOM   4088  HA  GLN X 252     235.009 231.952 335.965  1.00  0.00           H
ATOM   4089  CB  GLN X 252     235.262 233.150 334.255  1.00  0.00           C
ATOM   4090  HB2 GLN X 252     234.813 234.064 333.864  1.00  0.00           H
ATOM   4091  HB3 GLN X 252     236.291 233.452 334.451  1.00  0.00           H
ATOM   4092  CG  GLN X 252     235.190 232.041 333.242  1.00  0.00           C
ATOM   4093  HG2 GLN X 252     234.183 231.628 333.193  1.00  0.00           H
ATOM   4094  HG3 GLN X 252     235.491 232.413 332.263  1.00  0.00           H
ATOM   4095  CD  GLN X 252     236.167 230.926 333.614  1.00  0.00           C
ATOM   4096  OE1 GLN X 252     235.662 229.863 333.930  1.00  0.00           O
ATOM   4097  NE2 GLN X 252     237.375 231.112 333.838  1.00  0.00           N
ATOM   4098 HE21 GLN X 252     238.006 230.344 334.016  1.00  0.00           H
ATOM   4099 HE22 GLN X 252     237.726 232.045 333.676  1.00  0.00           H
ATOM   4100  C   GLN X 252     234.930 234.031 336.536  1.00  0.00           C
ATOM   4101  O   GLN X 252     236.153 234.188 336.951  1.00  0.00           O
ATOM   4102  N   GLU X 253     233.931 234.880 336.822  1.00  0.00           N
ATOM   4103  H   GLU X 253     233.026 234.728 336.401  1.00  0.00           H
ATOM   4104  CA  GLU X 253     234.017 236.047 337.786  1.00  0.00           C
ATOM   4105  HA  GLU X 253     235.063 236.223 338.036  1.00  0.00           H
ATOM   4106  CB  GLU X 253     233.492 237.363 337.158  1.00  0.00           C
ATOM   4107  HB2 GLU X 253     233.654 237.553 336.097  1.00  0.00           H
ATOM   4108  HB3 GLU X 253     232.411 237.321 337.290  1.00  0.00           H
ATOM   4109  CG  GLU X 253     234.021 238.643 337.825  1.00  0.00           C
ATOM   4110  HG2 GLU X 253     234.590 238.343 338.705  1.00  0.00           H
ATOM   4111  HG3 GLU X 253     234.700 239.124 337.120  1.00  0.00           H
ATOM   4112  CD  GLU X 253     232.907 239.591 338.156  1.00  0.00           C
ATOM   4113  OE1 GLU X 253     232.012 239.790 337.342  1.00  0.00           O
ATOM   4114  OE2 GLU X 253     232.827 240.068 339.312  1.00  0.00           O
ATOM   4115  C   GLU X 253     233.233 235.763 339.110  1.00  0.00           C
ATOM   4116  O   GLU X 253     233.584 236.357 340.139  1.00  0.00           O
ATOM   4117  N   SER X 254     232.173 234.987 339.118  1.00  0.00           N
ATOM   4118  H   SER X 254     231.866 234.694 338.201  1.00  0.00           H
ATOM   4119  CA  SER X 254     231.457 234.441 340.241  1.00  0.00           C
ATOM   4120  HA  SER X 254     231.086 235.255 340.863  1.00  0.00           H
ATOM   4121  CB  SER X 254     230.199 233.648 339.800  1.00  0.00           C
ATOM   4122  HB2 SER X 254     229.416 234.374 339.581  1.00  0.00           H
ATOM   4123  HB3 SER X 254     230.428 233.005 338.950  1.00  0.00           H
ATOM   4124  OG  SER X 254     229.614 232.826 340.737  1.00  0.00           O
ATOM   4125  HG  SER X 254     230.109 232.006 340.803  1.00  0.00           H
ATOM   4126  C   SER X 254     232.360 233.543 341.115  1.00  0.00           C
ATOM   4127  O   SER X 254     233.115 232.751 340.607  1.00  0.00           O
ATOM   4128  N   MET X 255     232.195 233.581 342.454  1.00  0.00           N
ATOM   4129  H   MET X 255     231.728 234.420 342.766  1.00  0.00           H
ATOM   4130  CA  MET X 255     232.573 232.600 343.417  1.00  0.00           C
ATOM   4131  HA  MET X 255     232.897 231.683 342.926  1.00  0.00           H
ATOM   4132  CB  MET X 255     233.846 233.133 344.106  1.00  0.00           C
ATOM   4133  HB2 MET X 255     234.258 232.271 344.630  1.00  0.00           H
ATOM   4134  HB3 MET X 255     234.577 233.282 343.311  1.00  0.00           H
ATOM   4135  CG  MET X 255     233.761 234.356 344.939  1.00  0.00           C
ATOM   4136  HG2 MET X 255     233.814 235.234 344.296  1.00  0.00           H
ATOM   4137  HG3 MET X 255     232.715 234.344 345.245  1.00  0.00           H
ATOM   4138  SD  MET X 255     234.845 234.241 346.349  1.00  0.00           S
ATOM   4139  CE  MET X 255     234.081 235.397 347.439  1.00  0.00           C
ATOM   4140  HE1 MET X 255     233.052 235.651 347.184  1.00  0.00           H
ATOM   4141  HE2 MET X 255     234.103 234.917 348.418  1.00  0.00           H
ATOM   4142  HE3 MET X 255     234.524 236.391 347.490  1.00  0.00           H
ATOM   4143  C   MET X 255     231.447 232.285 344.359  1.00  0.00           C
ATOM   4144  O   MET X 255     231.778 231.892 345.518  1.00  0.00           O
ATOM   4145  N   ASP X 256     230.169 232.423 344.029  1.00  0.00           N
ATOM   4146  H   ASP X 256     230.087 232.634 343.044  1.00  0.00           H
ATOM   4147  CA  ASP X 256     228.952 232.029 344.753  1.00  0.00           C
ATOM   4148  HA  ASP X 256     228.759 232.887 345.397  1.00  0.00           H
ATOM   4149  CB  ASP X 256     227.788 232.031 343.709  1.00  0.00           C
ATOM   4150  HB2 ASP X 256     227.776 232.963 343.143  1.00  0.00           H
ATOM   4151  HB3 ASP X 256     227.915 231.196 343.020  1.00  0.00           H
ATOM   4152  CG  ASP X 256     226.433 231.971 344.339  1.00  0.00           C
ATOM   4153  OD1 ASP X 256     226.241 232.180 345.549  1.00  0.00           O
ATOM   4154  OD2 ASP X 256     225.408 231.587 343.607  1.00  0.00           O
ATOM   4155  C   ASP X 256     229.062 230.794 345.634  1.00  0.00           C
ATOM   4156  O   ASP X 256     229.101 229.640 345.214  1.00  0.00           O
ATOM   4157  N   MET X 257     228.941 231.013 346.924  1.00  0.00           N
ATOM   4158  H   MET X 257     229.168 231.940 347.256  1.00  0.00           H
ATOM   4159  CA  MET X 257     228.835 229.983 348.024  1.00  0.00           C
ATOM   4160  HA  MET X 257     229.709 229.333 348.008  1.00  0.00           H
ATOM   4161  CB  MET X 257     228.745 230.788 349.323  1.00  0.00           C
ATOM   4162  HB2 MET X 257     228.920 230.103 350.153  1.00  0.00           H
ATOM   4163  HB3 MET X 257     229.658 231.377 349.406  1.00  0.00           H
ATOM   4164  CG  MET X 257     227.443 231.590 349.598  1.00  0.00           C
ATOM   4165  HG2 MET X 257     227.371 232.303 348.777  1.00  0.00           H
ATOM   4166  HG3 MET X 257     226.580 230.928 349.660  1.00  0.00           H
ATOM   4167  SD  MET X 257     227.539 232.466 351.196  1.00  0.00           S
ATOM   4168  CE  MET X 257     228.756 233.738 350.748  1.00  0.00           C
ATOM   4169  HE1 MET X 257     228.734 234.637 351.363  1.00  0.00           H
ATOM   4170  HE2 MET X 257     229.681 233.183 350.906  1.00  0.00           H
ATOM   4171  HE3 MET X 257     228.639 234.141 349.742  1.00  0.00           H
ATOM   4172  C   MET X 257     227.543 229.065 347.911  1.00  0.00           C
ATOM   4173  O   MET X 257     227.627 227.927 348.340  1.00  0.00           O
ATOM   4174  N   ASN X 258     226.483 229.388 347.139  1.00  0.00           N
ATOM   4175  H   ASN X 258     226.354 230.268 346.659  1.00  0.00           H
ATOM   4176  CA  ASN X 258     225.346 228.494 346.899  1.00  0.00           C
ATOM   4177  HA  ASN X 258     225.012 228.105 347.861  1.00  0.00           H
ATOM   4178  CB  ASN X 258     224.129 229.416 346.395  1.00  0.00           C
ATOM   4179  HB2 ASN X 258     224.548 229.877 345.500  1.00  0.00           H
ATOM   4180  HB3 ASN X 258     223.283 228.802 346.088  1.00  0.00           H
ATOM   4181  CG  ASN X 258     223.779 230.413 347.557  1.00  0.00           C
ATOM   4182  OD1 ASN X 258     223.034 230.084 348.473  1.00  0.00           O
ATOM   4183  ND2 ASN X 258     224.158 231.667 347.332  1.00  0.00           N
ATOM   4184 HD21 ASN X 258     224.079 232.361 348.062  1.00  0.00           H
ATOM   4185 HD22 ASN X 258     224.856 231.727 346.604  1.00  0.00           H
ATOM   4186  C   ASN X 258     225.674 227.385 345.936  1.00  0.00           C
ATOM   4187  O   ASN X 258     226.415 227.670 345.007  1.00  0.00           O
ATOM   4188  N   ASN X 259     225.051 226.166 346.102  1.00  0.00           N
ATOM   4189  H   ASN X 259     224.424 225.991 346.874  1.00  0.00           H
ATOM   4190  CA  ASN X 259     225.080 225.109 345.040  1.00  0.00           C
ATOM   4191  HA  ASN X 259     226.091 224.706 345.098  1.00  0.00           H
ATOM   4192  CB  ASN X 259     224.171 223.984 345.467  1.00  0.00           C
ATOM   4193  HB2 ASN X 259     223.438 224.362 346.180  1.00  0.00           H
ATOM   4194  HB3 ASN X 259     223.638 223.647 344.577  1.00  0.00           H
ATOM   4195  CG  ASN X 259     224.965 222.925 346.175  1.00  0.00           C
ATOM   4196  OD1 ASN X 259     225.197 223.016 347.382  1.00  0.00           O
ATOM   4197  ND2 ASN X 259     225.384 221.943 345.471  1.00  0.00           N
ATOM   4198 HD21 ASN X 259     225.926 221.221 345.923  1.00  0.00           H
ATOM   4199 HD22 ASN X 259     224.968 221.731 344.576  1.00  0.00           H
ATOM   4200  C   ASN X 259     224.664 225.614 343.607  1.00  0.00           C
ATOM   4201  O   ASN X 259     223.930 226.565 343.494  1.00  0.00           O
ATOM   4202  N   PRO X 260     225.148 224.900 342.583  1.00  0.00           N
ATOM   4203  CD  PRO X 260     226.038 223.766 342.747  1.00  0.00           C
ATOM   4204  HD2 PRO X 260     225.558 222.849 343.089  1.00  0.00           H
ATOM   4205  HD3 PRO X 260     226.941 224.057 343.283  1.00  0.00           H
ATOM   4206  CG  PRO X 260     226.440 223.447 341.281  1.00  0.00           C
ATOM   4207  HG2 PRO X 260     226.615 222.376 341.174  1.00  0.00           H
ATOM   4208  HG3 PRO X 260     227.318 224.038 341.020  1.00  0.00           H
ATOM   4209  CB  PRO X 260     225.193 223.850 340.497  1.00  0.00           C
ATOM   4210  HB2 PRO X 260     224.367 223.143 340.578  1.00  0.00           H
ATOM   4211  HB3 PRO X 260     225.382 223.994 339.433  1.00  0.00           H
ATOM   4212  CA  PRO X 260     224.804 225.166 341.170  1.00  0.00           C
ATOM   4213  HA  PRO X 260     225.441 226.020 340.941  1.00  0.00           H
ATOM   4214  C   PRO X 260     223.353 225.644 340.797  1.00  0.00           C
ATOM   4215  O   PRO X 260     222.459 224.858 341.002  1.00  0.00           O
ATOM   4216  N   GLN X 261     223.132 226.865 340.271  1.00  0.00           N
ATOM   4217  H   GLN X 261     224.040 227.283 340.126  1.00  0.00           H
ATOM   4218  CA  GLN X 261     221.837 227.538 340.031  1.00  0.00           C
ATOM   4219  HA  GLN X 261     221.157 227.121 340.774  1.00  0.00           H
ATOM   4220  CB  GLN X 261     222.013 228.982 340.407  1.00  0.00           C
ATOM   4221  HB2 GLN X 261     222.728 229.309 339.652  1.00  0.00           H
ATOM   4222  HB3 GLN X 261     221.083 229.536 340.278  1.00  0.00           H
ATOM   4223  CG  GLN X 261     222.564 229.162 341.829  1.00  0.00           C
ATOM   4224  HG2 GLN X 261     223.385 228.495 342.092  1.00  0.00           H
ATOM   4225  HG3 GLN X 261     222.987 230.159 341.959  1.00  0.00           H
ATOM   4226  CD  GLN X 261     221.442 229.083 342.965  1.00  0.00           C
ATOM   4227  OE1 GLN X 261     220.381 229.579 342.760  1.00  0.00           O
ATOM   4228  NE2 GLN X 261     221.725 228.416 344.061  1.00  0.00           N
ATOM   4229 HE21 GLN X 261     221.018 228.475 344.781  1.00  0.00           H
ATOM   4230 HE22 GLN X 261     222.666 228.068 344.172  1.00  0.00           H
ATOM   4231  C   GLN X 261     221.368 227.366 338.558  1.00  0.00           C
ATOM   4232  O   GLN X 261     220.321 227.891 338.251  1.00  0.00           O
ATOM   4233  N   ASP X 262     222.129 226.667 337.760  1.00  0.00           N
ATOM   4234  H   ASP X 262     223.064 226.463 338.083  1.00  0.00           H
ATOM   4235  CA  ASP X 262     221.871 226.377 336.329  1.00  0.00           C
ATOM   4236  HA  ASP X 262     220.824 226.091 336.233  1.00  0.00           H
ATOM   4237  CB  ASP X 262     222.043 227.686 335.502  1.00  0.00           C
ATOM   4238  HB2 ASP X 262     221.837 227.361 334.482  1.00  0.00           H
ATOM   4239  HB3 ASP X 262     221.204 228.336 335.748  1.00  0.00           H
ATOM   4240  CG  ASP X 262     223.382 228.468 335.572  1.00  0.00           C
ATOM   4241  OD1 ASP X 262     224.401 228.105 334.950  1.00  0.00           O
ATOM   4242  OD2 ASP X 262     223.391 229.481 336.266  1.00  0.00           O
ATOM   4243  C   ASP X 262     222.626 225.196 335.724  1.00  0.00           C
ATOM   4244  O   ASP X 262     223.601 224.676 336.245  1.00  0.00           O
ATOM   4245  N   PHE X 263     222.223 224.737 334.533  1.00  0.00           N
ATOM   4246  H   PHE X 263     221.554 225.270 333.995  1.00  0.00           H
ATOM   4247  CA  PHE X 263     223.057 223.777 333.737  1.00  0.00           C
ATOM   4248  HA  PHE X 263     223.031 222.928 334.420  1.00  0.00           H
ATOM   4249  CB  PHE X 263     222.398 223.366 332.361  1.00  0.00           C
ATOM   4250  HB2 PHE X 263     221.339 223.234 332.581  1.00  0.00           H
ATOM   4251  HB3 PHE X 263     222.518 224.240 331.721  1.00  0.00           H
ATOM   4252  CG  PHE X 263     222.842 222.141 331.615  1.00  0.00           C
ATOM   4253  CD1 PHE X 263     222.015 220.985 331.579  1.00  0.00           C
ATOM   4254  HD1 PHE X 263     221.062 220.931 332.085  1.00  0.00           H
ATOM   4255  CE1 PHE X 263     222.505 219.899 330.861  1.00  0.00           C
ATOM   4256  HE1 PHE X 263     221.978 218.966 330.994  1.00  0.00           H
ATOM   4257  CZ  PHE X 263     223.781 219.829 330.195  1.00  0.00           C
ATOM   4258  HZ  PHE X 263     224.106 218.910 329.730  1.00  0.00           H
ATOM   4259  CE2 PHE X 263     224.474 221.068 330.130  1.00  0.00           C
ATOM   4260  HE2 PHE X 263     225.305 221.155 329.446  1.00  0.00           H
ATOM   4261  CD2 PHE X 263     224.064 222.239 330.888  1.00  0.00           C
ATOM   4262  HD2 PHE X 263     224.498 223.201 330.660  1.00  0.00           H
ATOM   4263  C   PHE X 263     224.523 224.132 333.497  1.00  0.00           C
ATOM   4264  O   PHE X 263     225.392 223.208 333.568  1.00  0.00           O
ATOM   4265  N   ILE X 264     224.854 225.405 333.205  1.00  0.00           N
ATOM   4266  H   ILE X 264     224.048 226.013 333.262  1.00  0.00           H
ATOM   4267  CA  ILE X 264     226.175 225.812 332.792  1.00  0.00           C
ATOM   4268  HA  ILE X 264     226.564 225.174 331.998  1.00  0.00           H
ATOM   4269  CB  ILE X 264     226.179 227.171 332.102  1.00  0.00           C
ATOM   4270  HB  ILE X 264     225.718 227.959 332.699  1.00  0.00           H
ATOM   4271  CG2 ILE X 264     227.665 227.397 331.786  1.00  0.00           C
ATOM   4272 HG21 ILE X 264     227.788 228.417 331.420  1.00  0.00           H
ATOM   4273 HG22 ILE X 264     228.144 226.655 331.148  1.00  0.00           H
ATOM   4274 HG23 ILE X 264     228.184 227.471 332.742  1.00  0.00           H
ATOM   4275  CG1 ILE X 264     225.333 226.959 330.762  1.00  0.00           C
ATOM   4276 HG12 ILE X 264     225.398 225.957 330.337  1.00  0.00           H
ATOM   4277 HG13 ILE X 264     224.299 227.200 331.006  1.00  0.00           H
ATOM   4278  CD1 ILE X 264     225.737 227.879 329.608  1.00  0.00           C
ATOM   4279 HD11 ILE X 264     225.187 227.749 328.676  1.00  0.00           H
ATOM   4280 HD12 ILE X 264     225.546 228.900 329.940  1.00  0.00           H
ATOM   4281 HD13 ILE X 264     226.740 227.717 329.213  1.00  0.00           H
ATOM   4282  C   ILE X 264     227.110 225.776 334.021  1.00  0.00           C
ATOM   4283  O   ILE X 264     228.106 225.107 333.943  1.00  0.00           O
ATOM   4284  N   ASP X 265     226.626 226.307 335.148  1.00  0.00           N
ATOM   4285  H   ASP X 265     225.750 226.791 335.009  1.00  0.00           H
ATOM   4286  CA  ASP X 265     227.199 226.293 336.511  1.00  0.00           C
ATOM   4287  HA  ASP X 265     228.128 226.852 336.398  1.00  0.00           H
ATOM   4288  CB  ASP X 265     226.165 226.932 337.477  1.00  0.00           C
ATOM   4289  HB2 ASP X 265     225.709 227.800 337.000  1.00  0.00           H
ATOM   4290  HB3 ASP X 265     225.393 226.211 337.747  1.00  0.00           H
ATOM   4291  CG  ASP X 265     226.641 227.427 338.791  1.00  0.00           C
ATOM   4292  OD1 ASP X 265     227.771 227.165 339.238  1.00  0.00           O
ATOM   4293  OD2 ASP X 265     225.714 228.010 339.365  1.00  0.00           O
ATOM   4294  C   ASP X 265     227.451 224.876 336.959  1.00  0.00           C
ATOM   4295  O   ASP X 265     228.525 224.548 337.351  1.00  0.00           O
ATOM   4296  N   CYS X 266     226.516 223.926 336.710  1.00  0.00           N
ATOM   4297  H   CYS X 266     225.618 224.349 336.520  1.00  0.00           H
ATOM   4298  CA  CYS X 266     226.579 222.557 337.203  1.00  0.00           C
ATOM   4299  HA  CYS X 266     226.822 222.501 338.264  1.00  0.00           H
ATOM   4300  CB  CYS X 266     225.126 221.984 337.085  1.00  0.00           C
ATOM   4301  HB2 CYS X 266     224.431 222.726 337.478  1.00  0.00           H
ATOM   4302  HB3 CYS X 266     224.888 221.825 336.033  1.00  0.00           H
ATOM   4303  SG  CYS X 266     225.006 220.298 337.869  1.00  0.00           S
ATOM   4304  HG  CYS X 266     224.779 219.757 336.669  1.00  0.00           H
ATOM   4305  C   CYS X 266     227.609 221.831 336.285  1.00  0.00           C
ATOM   4306  O   CYS X 266     228.376 221.015 336.827  1.00  0.00           O
ATOM   4307  N   PHE X 267     227.648 222.146 334.986  1.00  0.00           N
ATOM   4308  H   PHE X 267     227.048 222.820 334.533  1.00  0.00           H
ATOM   4309  CA  PHE X 267     228.686 221.606 334.119  1.00  0.00           C
ATOM   4310  HA  PHE X 267     228.705 220.517 334.106  1.00  0.00           H
ATOM   4311  CB  PHE X 267     228.298 221.881 332.661  1.00  0.00           C
ATOM   4312  HB2 PHE X 267     227.282 221.498 332.566  1.00  0.00           H
ATOM   4313  HB3 PHE X 267     228.169 222.948 332.479  1.00  0.00           H
ATOM   4314  CG  PHE X 267     229.186 221.287 331.637  1.00  0.00           C
ATOM   4315  CD1 PHE X 267     228.722 220.288 330.689  1.00  0.00           C
ATOM   4316  HD1 PHE X 267     227.690 219.972 330.747  1.00  0.00           H
ATOM   4317  CE1 PHE X 267     229.620 219.659 329.805  1.00  0.00           C
ATOM   4318  HE1 PHE X 267     229.268 219.005 329.020  1.00  0.00           H
ATOM   4319  CZ  PHE X 267     230.934 220.131 329.701  1.00  0.00           C
ATOM   4320  HZ  PHE X 267     231.599 219.701 328.967  1.00  0.00           H
ATOM   4321  CE2 PHE X 267     231.429 221.137 330.621  1.00  0.00           C
ATOM   4322  HE2 PHE X 267     232.386 221.636 330.591  1.00  0.00           H
ATOM   4323  CD2 PHE X 267     230.525 221.773 331.488  1.00  0.00           C
ATOM   4324  HD2 PHE X 267     230.891 222.677 331.951  1.00  0.00           H
ATOM   4325  C   PHE X 267     230.056 222.193 334.510  1.00  0.00           C
ATOM   4326  O   PHE X 267     231.051 221.458 334.452  1.00  0.00           O
ATOM   4327  N   LEU X 268     230.190 223.475 334.900  1.00  0.00           N
ATOM   4328  H   LEU X 268     229.428 224.124 334.766  1.00  0.00           H
ATOM   4329  CA  LEU X 268     231.491 223.909 335.389  1.00  0.00           C
ATOM   4330  HA  LEU X 268     232.271 223.533 334.728  1.00  0.00           H
ATOM   4331  CB  LEU X 268     231.518 225.427 335.421  1.00  0.00           C
ATOM   4332  HB2 LEU X 268     230.533 225.741 335.765  1.00  0.00           H
ATOM   4333  HB3 LEU X 268     232.250 225.684 336.187  1.00  0.00           H
ATOM   4334  CG  LEU X 268     231.989 225.985 334.066  1.00  0.00           C
ATOM   4335  HG  LEU X 268     231.567 225.461 333.209  1.00  0.00           H
ATOM   4336  CD1 LEU X 268     231.532 227.470 333.885  1.00  0.00           C
ATOM   4337 HD11 LEU X 268     230.447 227.565 333.856  1.00  0.00           H
ATOM   4338 HD12 LEU X 268     231.970 228.041 334.705  1.00  0.00           H
ATOM   4339 HD13 LEU X 268     231.994 227.815 332.960  1.00  0.00           H
ATOM   4340  CD2 LEU X 268     233.555 225.981 333.931  1.00  0.00           C
ATOM   4341 HD21 LEU X 268     233.966 226.268 334.900  1.00  0.00           H
ATOM   4342 HD22 LEU X 268     233.800 224.977 333.584  1.00  0.00           H
ATOM   4343 HD23 LEU X 268     233.896 226.773 333.265  1.00  0.00           H
ATOM   4344  C   LEU X 268     231.938 223.308 336.735  1.00  0.00           C
ATOM   4345  O   LEU X 268     233.117 223.154 336.980  1.00  0.00           O
ATOM   4346  N   MET X 269     230.926 222.847 337.514  1.00  0.00           N
ATOM   4347  H   MET X 269     229.978 223.052 337.231  1.00  0.00           H
ATOM   4348  CA  MET X 269     231.250 222.107 338.720  1.00  0.00           C
ATOM   4349  HA  MET X 269     232.151 222.453 339.227  1.00  0.00           H
ATOM   4350  CB  MET X 269     230.101 222.175 339.786  1.00  0.00           C
ATOM   4351  HB2 MET X 269     230.158 223.134 340.301  1.00  0.00           H
ATOM   4352  HB3 MET X 269     229.139 222.030 339.294  1.00  0.00           H
ATOM   4353  CG  MET X 269     230.304 221.119 340.912  1.00  0.00           C
ATOM   4354  HG2 MET X 269     231.372 221.128 341.130  1.00  0.00           H
ATOM   4355  HG3 MET X 269     229.816 221.429 341.836  1.00  0.00           H
ATOM   4356  SD  MET X 269     229.804 219.325 340.681  1.00  0.00           S
ATOM   4357  CE  MET X 269     227.983 219.419 340.693  1.00  0.00           C
ATOM   4358  HE1 MET X 269     227.693 220.072 341.516  1.00  0.00           H
ATOM   4359  HE2 MET X 269     227.610 219.915 339.797  1.00  0.00           H
ATOM   4360  HE3 MET X 269     227.585 218.411 340.815  1.00  0.00           H
ATOM   4361  C   MET X 269     231.739 220.690 338.339  1.00  0.00           C
ATOM   4362  O   MET X 269     232.779 220.180 338.768  1.00  0.00           O
ATOM   4363  N   LYS X 270     231.035 219.900 337.500  1.00  0.00           N
ATOM   4364  H   LYS X 270     230.171 220.242 337.105  1.00  0.00           H
ATOM   4365  CA  LYS X 270     231.517 218.568 337.029  1.00  0.00           C
ATOM   4366  HA  LYS X 270     231.845 217.970 337.879  1.00  0.00           H
ATOM   4367  CB  LYS X 270     230.350 217.942 336.203  1.00  0.00           C
ATOM   4368  HB2 LYS X 270     229.428 217.934 336.784  1.00  0.00           H
ATOM   4369  HB3 LYS X 270     230.253 218.604 335.343  1.00  0.00           H
ATOM   4370  CG  LYS X 270     230.679 216.483 335.802  1.00  0.00           C
ATOM   4371  HG2 LYS X 270     229.865 216.169 335.149  1.00  0.00           H
ATOM   4372  HG3 LYS X 270     231.532 216.380 335.130  1.00  0.00           H
ATOM   4373  CD  LYS X 270     230.785 215.505 336.990  1.00  0.00           C
ATOM   4374  HD2 LYS X 270     231.555 215.876 337.667  1.00  0.00           H
ATOM   4375  HD3 LYS X 270     229.851 215.518 337.550  1.00  0.00           H
ATOM   4376  CE  LYS X 270     231.043 214.012 336.560  1.00  0.00           C
ATOM   4377  HE2 LYS X 270     230.568 213.828 335.597  1.00  0.00           H
ATOM   4378  HE3 LYS X 270     232.029 213.635 336.287  1.00  0.00           H
ATOM   4379  NZ  LYS X 270     230.719 213.085 337.636  1.00  0.00           N
ATOM   4380  HZ1 LYS X 270     230.861 212.156 337.267  1.00  0.00           H
ATOM   4381  HZ2 LYS X 270     229.731 213.120 337.842  1.00  0.00           H
ATOM   4382  HZ3 LYS X 270     231.257 213.302 338.463  1.00  0.00           H
ATOM   4383  C   LYS X 270     232.829 218.555 336.166  1.00  0.00           C
ATOM   4384  O   LYS X 270     233.755 217.727 336.375  1.00  0.00           O
ATOM   4385  N   MET X 271     232.986 219.487 335.230  1.00  0.00           N
ATOM   4386  H   MET X 271     232.202 220.120 335.159  1.00  0.00           H
ATOM   4387  CA  MET X 271     234.245 219.802 334.534  1.00  0.00           C
ATOM   4388  HA  MET X 271     234.539 219.039 333.813  1.00  0.00           H
ATOM   4389  CB  MET X 271     233.963 221.105 333.611  1.00  0.00           C
ATOM   4390  HB2 MET X 271     233.161 220.868 332.912  1.00  0.00           H
ATOM   4391  HB3 MET X 271     233.620 221.930 334.236  1.00  0.00           H
ATOM   4392  CG  MET X 271     235.151 221.684 332.744  1.00  0.00           C
ATOM   4393  HG2 MET X 271     235.873 222.077 333.459  1.00  0.00           H
ATOM   4394  HG3 MET X 271     235.812 220.894 332.389  1.00  0.00           H
ATOM   4395  SD  MET X 271     234.751 222.850 331.476  1.00  0.00           S
ATOM   4396  CE  MET X 271     236.233 223.912 331.857  1.00  0.00           C
ATOM   4397  HE1 MET X 271     236.312 224.244 332.893  1.00  0.00           H
ATOM   4398  HE2 MET X 271     237.124 223.329 331.626  1.00  0.00           H
ATOM   4399  HE3 MET X 271     236.117 224.690 331.102  1.00  0.00           H
ATOM   4400  C   MET X 271     235.512 219.982 335.422  1.00  0.00           C
ATOM   4401  O   MET X 271     236.633 219.415 335.130  1.00  0.00           O
ATOM   4402  N   GLU X 272     235.345 220.616 336.622  1.00  0.00           N
ATOM   4403  H   GLU X 272     234.436 220.874 336.977  1.00  0.00           H
ATOM   4404  CA  GLU X 272     236.419 220.910 337.554  1.00  0.00           C
ATOM   4405  HA  GLU X 272     237.207 221.339 336.935  1.00  0.00           H
ATOM   4406  CB  GLU X 272     235.953 221.895 338.599  1.00  0.00           C
ATOM   4407  HB2 GLU X 272     235.782 222.810 338.032  1.00  0.00           H
ATOM   4408  HB3 GLU X 272     235.004 221.515 338.978  1.00  0.00           H
ATOM   4409  CG  GLU X 272     236.942 222.264 339.696  1.00  0.00           C
ATOM   4410  HG2 GLU X 272     236.517 223.132 340.201  1.00  0.00           H
ATOM   4411  HG3 GLU X 272     237.040 221.403 340.357  1.00  0.00           H
ATOM   4412  CD  GLU X 272     238.313 222.644 339.114  1.00  0.00           C
ATOM   4413  OE1 GLU X 272     238.406 223.377 338.061  1.00  0.00           O
ATOM   4414  OE2 GLU X 272     239.281 222.397 339.889  1.00  0.00           O
ATOM   4415  C   GLU X 272     236.900 219.638 338.213  1.00  0.00           C
ATOM   4416  O   GLU X 272     238.058 219.439 338.341  1.00  0.00           O
ATOM   4417  N   LYS X 273     235.935 218.761 338.577  1.00  0.00           N
ATOM   4418  H   LYS X 273     235.015 218.942 338.202  1.00  0.00           H
ATOM   4419  CA  LYS X 273     236.211 217.450 339.242  1.00  0.00           C
ATOM   4420  HA  LYS X 273     236.992 217.578 339.992  1.00  0.00           H
ATOM   4421  CB  LYS X 273     234.889 216.794 339.881  1.00  0.00           C
ATOM   4422  HB2 LYS X 273     234.183 216.521 339.096  1.00  0.00           H
ATOM   4423  HB3 LYS X 273     235.173 215.846 340.339  1.00  0.00           H
ATOM   4424  CG  LYS X 273     234.136 217.675 340.949  1.00  0.00           C
ATOM   4425  HG2 LYS X 273     234.760 217.677 341.843  1.00  0.00           H
ATOM   4426  HG3 LYS X 273     233.890 218.672 340.583  1.00  0.00           H
ATOM   4427  CD  LYS X 273     232.738 217.078 341.310  1.00  0.00           C
ATOM   4428  HD2 LYS X 273     232.121 217.224 340.423  1.00  0.00           H
ATOM   4429  HD3 LYS X 273     232.926 216.060 341.650  1.00  0.00           H
ATOM   4430  CE  LYS X 273     232.123 217.907 342.461  1.00  0.00           C
ATOM   4431  HE2 LYS X 273     232.821 217.850 343.296  1.00  0.00           H
ATOM   4432  HE3 LYS X 273     232.066 218.911 342.041  1.00  0.00           H
ATOM   4433  NZ  LYS X 273     230.782 217.405 342.815  1.00  0.00           N
ATOM   4434  HZ1 LYS X 273     230.729 216.641 343.473  1.00  0.00           H
ATOM   4435  HZ2 LYS X 273     230.297 217.143 341.968  1.00  0.00           H
ATOM   4436  HZ3 LYS X 273     230.152 218.063 343.251  1.00  0.00           H
ATOM   4437  C   LYS X 273     236.877 216.546 338.235  1.00  0.00           C
ATOM   4438  O   LYS X 273     237.937 215.995 338.528  1.00  0.00           O
ATOM   4439  N   GLU X 274     236.331 216.382 337.008  1.00  0.00           N
ATOM   4440  H   GLU X 274     235.397 216.765 337.041  1.00  0.00           H
ATOM   4441  CA  GLU X 274     236.795 215.450 336.004  1.00  0.00           C
ATOM   4442  HA  GLU X 274     237.284 214.581 336.444  1.00  0.00           H
ATOM   4443  CB  GLU X 274     235.527 215.140 335.221  1.00  0.00           C
ATOM   4444  HB2 GLU X 274     235.070 216.061 334.859  1.00  0.00           H
ATOM   4445  HB3 GLU X 274     235.846 214.543 334.367  1.00  0.00           H
ATOM   4446  CG  GLU X 274     234.501 214.357 336.011  1.00  0.00           C
ATOM   4447  HG2 GLU X 274     234.078 214.917 336.845  1.00  0.00           H
ATOM   4448  HG3 GLU X 274     233.684 214.089 335.341  1.00  0.00           H
ATOM   4449  CD  GLU X 274     235.167 213.123 336.622  1.00  0.00           C
ATOM   4450  OE1 GLU X 274     235.936 212.465 335.897  1.00  0.00           O
ATOM   4451  OE2 GLU X 274     235.021 212.820 337.844  1.00  0.00           O
ATOM   4452  C   GLU X 274     237.927 216.066 335.115  1.00  0.00           C
ATOM   4453  O   GLU X 274     237.790 216.051 333.865  1.00  0.00           O
ATOM   4454  N   LYS X 275     238.937 216.731 335.671  1.00  0.00           N
ATOM   4455  H   LYS X 275     238.807 216.813 336.669  1.00  0.00           H
ATOM   4456  CA  LYS X 275     240.072 217.350 334.975  1.00  0.00           C
ATOM   4457  HA  LYS X 275     239.676 217.879 334.108  1.00  0.00           H
ATOM   4458  CB  LYS X 275     240.506 218.569 335.779  1.00  0.00           C
ATOM   4459  HB2 LYS X 275     241.115 219.164 335.100  1.00  0.00           H
ATOM   4460  HB3 LYS X 275     239.612 219.167 335.953  1.00  0.00           H
ATOM   4461  CG  LYS X 275     241.262 218.276 337.086  1.00  0.00           C
ATOM   4462  HG2 LYS X 275     240.537 217.983 337.846  1.00  0.00           H
ATOM   4463  HG3 LYS X 275     242.087 217.570 336.992  1.00  0.00           H
ATOM   4464  CD  LYS X 275     241.756 219.632 337.749  1.00  0.00           C
ATOM   4465  HD2 LYS X 275     242.768 219.816 337.388  1.00  0.00           H
ATOM   4466  HD3 LYS X 275     241.140 220.493 337.490  1.00  0.00           H
ATOM   4467  CE  LYS X 275     241.754 219.474 339.328  1.00  0.00           C
ATOM   4468  HE2 LYS X 275     242.180 218.566 339.754  1.00  0.00           H
ATOM   4469  HE3 LYS X 275     242.457 220.248 339.635  1.00  0.00           H
ATOM   4470  NZ  LYS X 275     240.438 219.756 339.902  1.00  0.00           N
ATOM   4471  HZ1 LYS X 275     239.667 219.309 339.427  1.00  0.00           H
ATOM   4472  HZ2 LYS X 275     240.091 220.703 339.947  1.00  0.00           H
ATOM   4473  HZ3 LYS X 275     240.500 219.462 340.866  1.00  0.00           H
ATOM   4474  C   LYS X 275     241.162 216.362 334.615  1.00  0.00           C
ATOM   4475  O   LYS X 275     241.380 215.383 335.289  1.00  0.00           O
ATOM   4476  N   HIE X 276     241.729 216.610 333.460  1.00  0.00           N
ATOM   4477  H   HIE X 276     241.455 217.458 332.985  1.00  0.00           H
ATOM   4478  CA  HIE X 276     242.638 215.670 332.819  1.00  0.00           C
ATOM   4479  HA  HIE X 276     242.513 215.937 331.770  1.00  0.00           H
ATOM   4480  CB  HIE X 276     244.099 216.049 333.101  1.00  0.00           C
ATOM   4481  HB2 HIE X 276     244.280 215.761 334.137  1.00  0.00           H
ATOM   4482  HB3 HIE X 276     244.760 215.417 332.508  1.00  0.00           H
ATOM   4483  CG  HIE X 276     244.451 217.481 332.950  1.00  0.00           C
ATOM   4484  ND1 HIE X 276     244.836 218.100 331.774  1.00  0.00           N
ATOM   4485  CE1 HIE X 276     245.263 219.307 332.096  1.00  0.00           C
ATOM   4486  HE1 HIE X 276     245.676 220.099 331.490  1.00  0.00           H
ATOM   4487  NE2 HIE X 276     245.171 219.546 333.385  1.00  0.00           N
ATOM   4488  HE2 HIE X 276     245.513 220.391 333.819  1.00  0.00           H
ATOM   4489  CD2 HIE X 276     244.665 218.393 333.932  1.00  0.00           C
ATOM   4490  HD2 HIE X 276     244.661 218.054 334.958  1.00  0.00           H
ATOM   4491  C   HIE X 276     242.320 214.249 332.607  1.00  0.00           C
ATOM   4492  O   HIE X 276     243.189 213.418 332.561  1.00  0.00           O
ATOM   4493  N   ASN X 277     241.091 213.836 332.406  1.00  0.00           N
ATOM   4494  H   ASN X 277     240.333 214.503 332.404  1.00  0.00           H
ATOM   4495  CA  ASN X 277     240.729 212.520 331.901  1.00  0.00           C
ATOM   4496  HA  ASN X 277     241.181 211.781 332.563  1.00  0.00           H
ATOM   4497  CB  ASN X 277     239.190 212.254 331.959  1.00  0.00           C
ATOM   4498  HB2 ASN X 277     238.587 212.959 331.387  1.00  0.00           H
ATOM   4499  HB3 ASN X 277     238.986 211.254 331.577  1.00  0.00           H
ATOM   4500  CG  ASN X 277     238.651 212.111 333.312  1.00  0.00           C
ATOM   4501  OD1 ASN X 277     239.327 211.987 334.387  1.00  0.00           O
ATOM   4502  ND2 ASN X 277     237.356 212.377 333.484  1.00  0.00           N
ATOM   4503 HD21 ASN X 277     236.973 212.469 334.414  1.00  0.00           H
ATOM   4504 HD22 ASN X 277     236.819 212.463 332.634  1.00  0.00           H
ATOM   4505  C   ASN X 277     241.214 212.242 330.442  1.00  0.00           C
ATOM   4506  O   ASN X 277     241.376 213.222 329.646  1.00  0.00           O
ATOM   4507  N   GLN X 278     241.311 210.903 330.144  1.00  0.00           N
ATOM   4508  H   GLN X 278     241.234 210.204 330.868  1.00  0.00           H
ATOM   4509  CA  GLN X 278     241.560 210.548 328.777  1.00  0.00           C
ATOM   4510  HA  GLN X 278     241.661 211.381 328.081  1.00  0.00           H
ATOM   4511  CB  GLN X 278     242.965 209.961 328.715  1.00  0.00           C
ATOM   4512  HB2 GLN X 278     243.633 210.751 329.059  1.00  0.00           H
ATOM   4513  HB3 GLN X 278     242.956 209.115 329.402  1.00  0.00           H
ATOM   4514  CG  GLN X 278     243.549 209.457 327.338  1.00  0.00           C
ATOM   4515  HG2 GLN X 278     244.628 209.309 327.398  1.00  0.00           H
ATOM   4516  HG3 GLN X 278     243.080 208.531 327.007  1.00  0.00           H
ATOM   4517  CD  GLN X 278     243.325 210.485 326.232  1.00  0.00           C
ATOM   4518  OE1 GLN X 278     243.613 211.673 326.579  1.00  0.00           O
ATOM   4519  NE2 GLN X 278     243.032 210.064 324.985  1.00  0.00           N
ATOM   4520 HE21 GLN X 278     243.142 210.684 324.195  1.00  0.00           H
ATOM   4521 HE22 GLN X 278     243.052 209.079 324.763  1.00  0.00           H
ATOM   4522  C   GLN X 278     240.508 209.577 328.205  1.00  0.00           C
ATOM   4523  O   GLN X 278     240.209 208.565 328.841  1.00  0.00           O
ATOM   4524  N   PRO X 279     239.817 209.882 327.088  1.00  0.00           N
ATOM   4525  CD  PRO X 279     238.900 208.900 326.446  1.00  0.00           C
ATOM   4526  HD2 PRO X 279     238.336 208.392 327.228  1.00  0.00           H
ATOM   4527  HD3 PRO X 279     239.461 208.353 325.689  1.00  0.00           H
ATOM   4528  CG  PRO X 279     237.934 209.814 325.651  1.00  0.00           C
ATOM   4529  HG2 PRO X 279     237.050 210.143 326.198  1.00  0.00           H
ATOM   4530  HG3 PRO X 279     237.692 209.351 324.694  1.00  0.00           H
ATOM   4531  CB  PRO X 279     238.856 211.010 325.303  1.00  0.00           C
ATOM   4532  HB2 PRO X 279     238.340 211.838 324.818  1.00  0.00           H
ATOM   4533  HB3 PRO X 279     239.611 210.689 324.585  1.00  0.00           H
ATOM   4534  CA  PRO X 279     239.660 211.260 326.573  1.00  0.00           C
ATOM   4535  HA  PRO X 279     240.638 211.654 326.296  1.00  0.00           H
ATOM   4536  C   PRO X 279     238.851 212.150 327.571  1.00  0.00           C
ATOM   4537  O   PRO X 279     238.105 211.634 328.397  1.00  0.00           O
ATOM   4538  N   SER X 280     239.205 213.392 327.409  1.00  0.00           N
ATOM   4539  H   SER X 280     239.762 213.684 326.618  1.00  0.00           H
ATOM   4540  CA  SER X 280     238.486 214.456 327.988  1.00  0.00           C
ATOM   4541  HA  SER X 280     238.480 214.305 329.067  1.00  0.00           H
ATOM   4542  CB  SER X 280     239.266 215.772 327.819  1.00  0.00           C
ATOM   4543  HB2 SER X 280     240.260 215.659 328.252  1.00  0.00           H
ATOM   4544  HB3 SER X 280     239.289 216.024 326.759  1.00  0.00           H
ATOM   4545  OG  SER X 280     238.536 216.767 328.583  1.00  0.00           O
ATOM   4546  HG  SER X 280     238.922 217.645 328.534  1.00  0.00           H
ATOM   4547  C   SER X 280     236.923 214.435 327.629  1.00  0.00           C
ATOM   4548  O   SER X 280     236.565 214.311 326.462  1.00  0.00           O
ATOM   4549  N   GLU X 281     235.986 214.623 328.548  1.00  0.00           N
ATOM   4550  H   GLU X 281     236.364 214.827 329.462  1.00  0.00           H
ATOM   4551  CA  GLU X 281     234.565 214.568 328.365  1.00  0.00           C
ATOM   4552  HA  GLU X 281     234.316 214.234 327.357  1.00  0.00           H
ATOM   4553  CB  GLU X 281     233.864 213.530 329.387  1.00  0.00           C
ATOM   4554  HB2 GLU X 281     233.781 213.835 330.430  1.00  0.00           H
ATOM   4555  HB3 GLU X 281     232.841 213.542 329.012  1.00  0.00           H
ATOM   4556  CG  GLU X 281     234.550 212.137 329.376  1.00  0.00           C
ATOM   4557  HG2 GLU X 281     233.699 211.463 329.283  1.00  0.00           H
ATOM   4558  HG3 GLU X 281     235.082 211.942 328.445  1.00  0.00           H
ATOM   4559  CD  GLU X 281     235.334 211.775 330.661  1.00  0.00           C
ATOM   4560  OE1 GLU X 281     235.596 210.648 331.039  1.00  0.00           O
ATOM   4561  OE2 GLU X 281     235.705 212.749 331.355  1.00  0.00           O
ATOM   4562  C   GLU X 281     233.978 215.997 328.562  1.00  0.00           C
ATOM   4563  O   GLU X 281     233.187 216.559 327.828  1.00  0.00           O
ATOM   4564  N   PHE X 282     234.404 216.641 329.663  1.00  0.00           N
ATOM   4565  H   PHE X 282     235.333 216.344 329.925  1.00  0.00           H
ATOM   4566  CA  PHE X 282     233.943 217.983 330.092  1.00  0.00           C
ATOM   4567  HA  PHE X 282     233.020 218.300 329.606  1.00  0.00           H
ATOM   4568  CB  PHE X 282     233.593 217.875 331.525  1.00  0.00           C
ATOM   4569  HB2 PHE X 282     234.501 217.634 332.077  1.00  0.00           H
ATOM   4570  HB3 PHE X 282     233.245 218.819 331.946  1.00  0.00           H
ATOM   4571  CG  PHE X 282     232.545 216.814 331.968  1.00  0.00           C
ATOM   4572  CD1 PHE X 282     231.182 216.919 331.879  1.00  0.00           C
ATOM   4573  HD1 PHE X 282     230.763 217.810 331.434  1.00  0.00           H
ATOM   4574  CE1 PHE X 282     230.371 215.862 332.209  1.00  0.00           C
ATOM   4575  HE1 PHE X 282     229.303 215.990 332.114  1.00  0.00           H
ATOM   4576  CZ  PHE X 282     230.892 214.664 332.730  1.00  0.00           C
ATOM   4577  HZ  PHE X 282     230.207 213.929 333.125  1.00  0.00           H
ATOM   4578  CE2 PHE X 282     232.301 214.522 332.848  1.00  0.00           C
ATOM   4579  HE2 PHE X 282     232.776 213.659 333.290  1.00  0.00           H
ATOM   4580  CD2 PHE X 282     233.101 215.587 332.421  1.00  0.00           C
ATOM   4581  HD2 PHE X 282     234.149 215.376 332.270  1.00  0.00           H
ATOM   4582  C   PHE X 282     235.024 219.026 329.814  1.00  0.00           C
ATOM   4583  O   PHE X 282     236.206 218.838 330.138  1.00  0.00           O
ATOM   4584  N   THR X 283     234.671 220.062 329.133  1.00  0.00           N
ATOM   4585  H   THR X 283     233.780 219.991 328.661  1.00  0.00           H
ATOM   4586  CA  THR X 283     235.500 221.150 328.575  1.00  0.00           C
ATOM   4587  HA  THR X 283     236.156 221.624 329.306  1.00  0.00           H
ATOM   4588  CB  THR X 283     236.355 220.571 327.466  1.00  0.00           C
ATOM   4589  HB  THR X 283     237.203 220.036 327.894  1.00  0.00           H
ATOM   4590  CG2 THR X 283     235.629 219.652 326.490  1.00  0.00           C
ATOM   4591 HG21 THR X 283     235.115 218.886 327.070  1.00  0.00           H
ATOM   4592 HG22 THR X 283     236.325 219.078 325.879  1.00  0.00           H
ATOM   4593 HG23 THR X 283     234.876 220.102 325.842  1.00  0.00           H
ATOM   4594  OG1 THR X 283     236.925 221.599 326.613  1.00  0.00           O
ATOM   4595  HG1 THR X 283     237.538 222.048 327.200  1.00  0.00           H
ATOM   4596  C   THR X 283     234.543 222.220 328.025  1.00  0.00           C
ATOM   4597  O   THR X 283     233.405 221.875 327.664  1.00  0.00           O
ATOM   4598  N   ILE X 284     234.946 223.472 327.815  1.00  0.00           N
ATOM   4599  H   ILE X 284     235.941 223.568 327.957  1.00  0.00           H
ATOM   4600  CA  ILE X 284     234.124 224.410 327.128  1.00  0.00           C
ATOM   4601  HA  ILE X 284     233.214 224.651 327.677  1.00  0.00           H
ATOM   4602  CB  ILE X 284     234.976 225.766 327.024  1.00  0.00           C
ATOM   4603  HB  ILE X 284     235.966 225.519 326.641  1.00  0.00           H
ATOM   4604  CG2 ILE X 284     234.331 226.859 326.177  1.00  0.00           C
ATOM   4605 HG21 ILE X 284     233.335 227.058 326.573  1.00  0.00           H
ATOM   4606 HG22 ILE X 284     234.345 226.635 325.111  1.00  0.00           H
ATOM   4607 HG23 ILE X 284     234.908 227.780 326.258  1.00  0.00           H
ATOM   4608  CG1 ILE X 284     235.374 226.268 328.442  1.00  0.00           C
ATOM   4609 HG12 ILE X 284     235.956 225.441 328.848  1.00  0.00           H
ATOM   4610 HG13 ILE X 284     236.106 227.068 328.322  1.00  0.00           H
ATOM   4611  CD1 ILE X 284     234.368 226.852 329.416  1.00  0.00           C
ATOM   4612 HD11 ILE X 284     234.896 227.110 330.334  1.00  0.00           H
ATOM   4613 HD12 ILE X 284     233.874 227.744 329.033  1.00  0.00           H
ATOM   4614 HD13 ILE X 284     233.676 226.067 329.719  1.00  0.00           H
ATOM   4615  C   ILE X 284     233.592 223.923 325.750  1.00  0.00           C
ATOM   4616  O   ILE X 284     232.474 224.210 325.403  1.00  0.00           O
ATOM   4617  N   GLU X 285     234.311 223.110 325.044  1.00  0.00           N
ATOM   4618  H   GLU X 285     235.064 222.599 325.482  1.00  0.00           H
ATOM   4619  CA  GLU X 285     233.965 222.751 323.629  1.00  0.00           C
ATOM   4620  HA  GLU X 285     233.780 223.690 323.107  1.00  0.00           H
ATOM   4621  CB  GLU X 285     235.171 222.091 323.010  1.00  0.00           C
ATOM   4622  HB2 GLU X 285     236.101 222.602 323.261  1.00  0.00           H
ATOM   4623  HB3 GLU X 285     235.142 221.153 323.563  1.00  0.00           H
ATOM   4624  CG  GLU X 285     235.043 222.082 321.513  1.00  0.00           C
ATOM   4625  HG2 GLU X 285     235.651 221.240 321.182  1.00  0.00           H
ATOM   4626  HG3 GLU X 285     234.058 221.826 321.122  1.00  0.00           H
ATOM   4627  CD  GLU X 285     235.499 223.406 320.798  1.00  0.00           C
ATOM   4628  OE1 GLU X 285     234.735 223.891 319.901  1.00  0.00           O
ATOM   4629  OE2 GLU X 285     236.509 223.979 321.171  1.00  0.00           O
ATOM   4630  C   GLU X 285     232.709 221.753 323.476  1.00  0.00           C
ATOM   4631  O   GLU X 285     231.857 221.824 322.603  1.00  0.00           O
ATOM   4632  N   SER X 286     232.653 220.773 324.358  1.00  0.00           N
ATOM   4633  H   SER X 286     233.308 220.692 325.123  1.00  0.00           H
ATOM   4634  CA  SER X 286     231.478 219.859 324.529  1.00  0.00           C
ATOM   4635  HA  SER X 286     231.290 219.458 323.533  1.00  0.00           H
ATOM   4636  CB  SER X 286     231.867 218.620 325.418  1.00  0.00           C
ATOM   4637  HB2 SER X 286     231.029 217.926 325.479  1.00  0.00           H
ATOM   4638  HB3 SER X 286     232.657 218.095 324.881  1.00  0.00           H
ATOM   4639  OG  SER X 286     232.333 218.982 326.709  1.00  0.00           O
ATOM   4640  HG  SER X 286     232.473 218.159 327.183  1.00  0.00           H
ATOM   4641  C   SER X 286     230.204 220.587 325.113  1.00  0.00           C
ATOM   4642  O   SER X 286     229.157 220.481 324.542  1.00  0.00           O
ATOM   4643  N   LEU X 287     230.386 221.283 326.233  1.00  0.00           N
ATOM   4644  H   LEU X 287     231.253 221.161 326.737  1.00  0.00           H
ATOM   4645  CA  LEU X 287     229.437 222.310 326.753  1.00  0.00           C
ATOM   4646  HA  LEU X 287     228.561 221.882 327.239  1.00  0.00           H
ATOM   4647  CB  LEU X 287     230.185 223.184 327.823  1.00  0.00           C
ATOM   4648  HB2 LEU X 287     230.354 222.553 328.695  1.00  0.00           H
ATOM   4649  HB3 LEU X 287     231.210 223.440 327.554  1.00  0.00           H
ATOM   4650  CG  LEU X 287     229.514 224.402 328.366  1.00  0.00           C
ATOM   4651  HG  LEU X 287     229.423 225.142 327.571  1.00  0.00           H
ATOM   4652  CD1 LEU X 287     228.085 224.171 328.897  1.00  0.00           C
ATOM   4653 HD11 LEU X 287     227.497 223.419 328.371  1.00  0.00           H
ATOM   4654 HD12 LEU X 287     228.040 223.759 329.905  1.00  0.00           H
ATOM   4655 HD13 LEU X 287     227.648 225.169 328.886  1.00  0.00           H
ATOM   4656  CD2 LEU X 287     230.369 225.167 329.447  1.00  0.00           C
ATOM   4657 HD21 LEU X 287     229.791 225.967 329.910  1.00  0.00           H
ATOM   4658 HD22 LEU X 287     230.721 224.394 330.129  1.00  0.00           H
ATOM   4659 HD23 LEU X 287     231.315 225.499 329.018  1.00  0.00           H
ATOM   4660  C   LEU X 287     228.928 223.286 325.732  1.00  0.00           C
ATOM   4661  O   LEU X 287     227.724 223.259 325.530  1.00  0.00           O
ATOM   4662  N   GLU X 288     229.770 223.982 325.000  1.00  0.00           N
ATOM   4663  H   GLU X 288     230.746 223.956 325.257  1.00  0.00           H
ATOM   4664  CA  GLU X 288     229.430 224.999 323.956  1.00  0.00           C
ATOM   4665  HA  GLU X 288     228.769 225.754 324.382  1.00  0.00           H
ATOM   4666  CB  GLU X 288     230.641 225.725 323.521  1.00  0.00           C
ATOM   4667  HB2 GLU X 288     231.010 226.242 324.406  1.00  0.00           H
ATOM   4668  HB3 GLU X 288     231.375 224.967 323.246  1.00  0.00           H
ATOM   4669  CG  GLU X 288     230.264 226.673 322.364  1.00  0.00           C
ATOM   4670  HG2 GLU X 288     229.798 226.123 321.547  1.00  0.00           H
ATOM   4671  HG3 GLU X 288     229.444 227.327 322.663  1.00  0.00           H
ATOM   4672  CD  GLU X 288     231.509 227.366 321.746  1.00  0.00           C
ATOM   4673  OE1 GLU X 288     231.562 227.353 320.477  1.00  0.00           O
ATOM   4674  OE2 GLU X 288     232.382 227.775 322.447  1.00  0.00           O
ATOM   4675  C   GLU X 288     228.547 224.388 322.784  1.00  0.00           C
ATOM   4676  O   GLU X 288     227.719 225.048 322.279  1.00  0.00           O
ATOM   4677  N   ASN X 289     228.624 223.064 322.575  1.00  0.00           N
ATOM   4678  H   ASN X 289     229.229 222.524 323.177  1.00  0.00           H
ATOM   4679  CA  ASN X 289     227.794 222.312 321.513  1.00  0.00           C
ATOM   4680  HA  ASN X 289     227.348 223.074 320.874  1.00  0.00           H
ATOM   4681  CB  ASN X 289     228.818 221.440 320.721  1.00  0.00           C
ATOM   4682  HB2 ASN X 289     229.538 220.963 321.386  1.00  0.00           H
ATOM   4683  HB3 ASN X 289     228.277 220.687 320.148  1.00  0.00           H
ATOM   4684  CG  ASN X 289     229.585 222.246 319.761  1.00  0.00           C
ATOM   4685  OD1 ASN X 289     229.126 222.547 318.674  1.00  0.00           O
ATOM   4686  ND2 ASN X 289     230.766 222.529 320.134  1.00  0.00           N
ATOM   4687 HD21 ASN X 289     231.400 223.110 319.604  1.00  0.00           H
ATOM   4688 HD22 ASN X 289     231.189 222.085 320.936  1.00  0.00           H
ATOM   4689  C   ASN X 289     226.634 221.428 322.111  1.00  0.00           C
ATOM   4690  O   ASN X 289     226.014 220.604 321.455  1.00  0.00           O
ATOM   4691  N   THR X 290     226.477 221.492 323.463  1.00  0.00           N
ATOM   4692  H   THR X 290     227.096 222.108 323.971  1.00  0.00           H
ATOM   4693  CA  THR X 290     225.481 220.715 324.219  1.00  0.00           C
ATOM   4694  HA  THR X 290     224.987 219.978 323.586  1.00  0.00           H
ATOM   4695  CB  THR X 290     226.214 219.941 325.402  1.00  0.00           C
ATOM   4696  HB  THR X 290     226.850 220.673 325.898  1.00  0.00           H
ATOM   4697  CG2 THR X 290     225.205 219.296 326.338  1.00  0.00           C
ATOM   4698 HG21 THR X 290     224.716 220.031 326.977  1.00  0.00           H
ATOM   4699 HG22 THR X 290     225.629 218.425 326.837  1.00  0.00           H
ATOM   4700 HG23 THR X 290     224.309 218.921 325.842  1.00  0.00           H
ATOM   4701  OG1 THR X 290     226.989 218.843 324.834  1.00  0.00           O
ATOM   4702  HG1 THR X 290     227.804 219.219 324.493  1.00  0.00           H
ATOM   4703  C   THR X 290     224.306 221.587 324.702  1.00  0.00           C
ATOM   4704  O   THR X 290     223.174 221.421 324.316  1.00  0.00           O
ATOM   4705  N   ALA X 291     224.576 222.596 325.561  1.00  0.00           N
ATOM   4706  H   ALA X 291     225.520 222.858 325.809  1.00  0.00           H
ATOM   4707  CA  ALA X 291     223.564 223.430 326.220  1.00  0.00           C
ATOM   4708  HA  ALA X 291     222.884 222.824 326.820  1.00  0.00           H
ATOM   4709  CB  ALA X 291     224.259 224.413 327.149  1.00  0.00           C
ATOM   4710  HB1 ALA X 291     224.816 223.936 327.956  1.00  0.00           H
ATOM   4711  HB2 ALA X 291     223.588 225.196 327.502  1.00  0.00           H
ATOM   4712  HB3 ALA X 291     225.030 224.925 326.573  1.00  0.00           H
ATOM   4713  C   ALA X 291     222.668 224.068 325.159  1.00  0.00           C
ATOM   4714  O   ALA X 291     221.425 224.217 325.403  1.00  0.00           O
ATOM   4715  N   VAL X 292     223.184 224.538 323.945  1.00  0.00           N
ATOM   4716  H   VAL X 292     224.177 224.400 323.823  1.00  0.00           H
ATOM   4717  CA  VAL X 292     222.448 225.134 322.802  1.00  0.00           C
ATOM   4718  HA  VAL X 292     221.789 225.893 323.223  1.00  0.00           H
ATOM   4719  CB  VAL X 292     223.427 225.803 321.863  1.00  0.00           C
ATOM   4720  HB  VAL X 292     222.802 226.278 321.106  1.00  0.00           H
ATOM   4721  CG1 VAL X 292     224.291 226.912 322.562  1.00  0.00           C
ATOM   4722 HG11 VAL X 292     224.771 227.547 321.817  1.00  0.00           H
ATOM   4723 HG12 VAL X 292     223.717 227.601 323.182  1.00  0.00           H
ATOM   4724 HG13 VAL X 292     225.088 226.604 323.240  1.00  0.00           H
ATOM   4725  CG2 VAL X 292     224.370 224.805 321.166  1.00  0.00           C
ATOM   4726 HG21 VAL X 292     225.139 225.254 320.538  1.00  0.00           H
ATOM   4727 HG22 VAL X 292     223.868 224.236 320.383  1.00  0.00           H
ATOM   4728 HG23 VAL X 292     224.895 224.189 321.896  1.00  0.00           H
ATOM   4729  C   VAL X 292     221.438 224.123 322.167  1.00  0.00           C
ATOM   4730  O   VAL X 292     220.367 224.492 321.826  1.00  0.00           O
ATOM   4731  N   ASP X 293     221.785 222.840 322.076  1.00  0.00           N
ATOM   4732  H   ASP X 293     222.640 222.587 322.549  1.00  0.00           H
ATOM   4733  CA  ASP X 293     220.948 221.800 321.553  1.00  0.00           C
ATOM   4734  HA  ASP X 293     220.408 222.134 320.667  1.00  0.00           H
ATOM   4735  CB  ASP X 293     221.757 220.615 321.077  1.00  0.00           C
ATOM   4736  HB2 ASP X 293     222.352 220.201 321.891  1.00  0.00           H
ATOM   4737  HB3 ASP X 293     221.016 219.847 320.855  1.00  0.00           H
ATOM   4738  CG  ASP X 293     222.704 220.897 319.895  1.00  0.00           C
ATOM   4739  OD1 ASP X 293     222.768 219.999 319.012  1.00  0.00           O
ATOM   4740  OD2 ASP X 293     223.195 221.984 319.671  1.00  0.00           O
ATOM   4741  C   ASP X 293     219.858 221.365 322.513  1.00  0.00           C
ATOM   4742  O   ASP X 293     218.744 221.085 322.186  1.00  0.00           O
ATOM   4743  N   LEU X 294     220.193 221.373 323.832  1.00  0.00           N
ATOM   4744  H   LEU X 294     221.098 221.584 324.229  1.00  0.00           H
ATOM   4745  CA  LEU X 294     219.174 221.150 324.817  1.00  0.00           C
ATOM   4746  HA  LEU X 294     218.600 220.252 324.586  1.00  0.00           H
ATOM   4747  CB  LEU X 294     219.857 220.929 326.159  1.00  0.00           C
ATOM   4748  HB2 LEU X 294     220.513 221.776 326.362  1.00  0.00           H
ATOM   4749  HB3 LEU X 294     219.073 220.919 326.916  1.00  0.00           H
ATOM   4750  CG  LEU X 294     220.756 219.669 326.432  1.00  0.00           C
ATOM   4751  HG  LEU X 294     221.811 219.943 326.420  1.00  0.00           H
ATOM   4752  CD1 LEU X 294     220.576 219.148 327.840  1.00  0.00           C
ATOM   4753 HD11 LEU X 294     221.261 218.316 328.004  1.00  0.00           H
ATOM   4754 HD12 LEU X 294     220.693 219.970 328.546  1.00  0.00           H
ATOM   4755 HD13 LEU X 294     219.603 218.660 327.892  1.00  0.00           H
ATOM   4756  CD2 LEU X 294     220.440 218.481 325.486  1.00  0.00           C
ATOM   4757 HD21 LEU X 294     219.409 218.157 325.623  1.00  0.00           H
ATOM   4758 HD22 LEU X 294     220.829 218.698 324.491  1.00  0.00           H
ATOM   4759 HD23 LEU X 294     221.093 217.682 325.837  1.00  0.00           H
ATOM   4760  C   LEU X 294     218.157 222.320 324.840  1.00  0.00           C
ATOM   4761  O   LEU X 294     217.009 222.015 325.174  1.00  0.00           O
ATOM   4762  N   PHE X 295     218.599 223.538 324.490  1.00  0.00           N
ATOM   4763  H   PHE X 295     219.587 223.598 324.692  1.00  0.00           H
ATOM   4764  CA  PHE X 295     217.828 224.750 324.404  1.00  0.00           C
ATOM   4765  HA  PHE X 295     217.197 224.754 325.292  1.00  0.00           H
ATOM   4766  CB  PHE X 295     218.808 225.942 324.458  1.00  0.00           C
ATOM   4767  HB2 PHE X 295     219.406 225.838 325.363  1.00  0.00           H
ATOM   4768  HB3 PHE X 295     219.426 225.915 323.561  1.00  0.00           H
ATOM   4769  CG  PHE X 295     218.176 227.330 324.699  1.00  0.00           C
ATOM   4770  CD1 PHE X 295     218.952 228.462 324.276  1.00  0.00           C
ATOM   4771  HD1 PHE X 295     219.860 228.374 323.699  1.00  0.00           H
ATOM   4772  CE1 PHE X 295     218.362 229.742 324.437  1.00  0.00           C
ATOM   4773  HE1 PHE X 295     218.856 230.628 324.066  1.00  0.00           H
ATOM   4774  CZ  PHE X 295     217.199 229.938 325.079  1.00  0.00           C
ATOM   4775  HZ  PHE X 295     216.840 230.929 325.314  1.00  0.00           H
ATOM   4776  CE2 PHE X 295     216.491 228.870 325.592  1.00  0.00           C
ATOM   4777  HE2 PHE X 295     215.494 228.999 325.985  1.00  0.00           H
ATOM   4778  CD2 PHE X 295     216.921 227.571 325.345  1.00  0.00           C
ATOM   4779  HD2 PHE X 295     216.355 226.731 325.722  1.00  0.00           H
ATOM   4780  C   PHE X 295     216.955 224.778 323.130  1.00  0.00           C
ATOM   4781  O   PHE X 295     215.744 225.024 323.142  1.00  0.00           O
ATOM   4782  N   GLY X 296     217.603 224.475 322.019  1.00  0.00           N
ATOM   4783  H   GLY X 296     218.575 224.230 322.139  1.00  0.00           H
ATOM   4784  CA  GLY X 296     217.105 224.829 320.646  1.00  0.00           C
ATOM   4785  HA2 GLY X 296     216.579 225.782 320.698  1.00  0.00           H
ATOM   4786  HA3 GLY X 296     217.906 225.018 319.932  1.00  0.00           H
ATOM   4787  C   GLY X 296     216.294 223.729 320.015  1.00  0.00           C
ATOM   4788  O   GLY X 296     215.193 224.034 319.502  1.00  0.00           O
ATOM   4789  N   ALA X 297     216.512 222.415 320.369  1.00  0.00           N
ATOM   4790  H   ALA X 297     217.404 222.230 320.805  1.00  0.00           H
ATOM   4791  CA  ALA X 297     215.696 221.236 320.089  1.00  0.00           C
ATOM   4792  HA  ALA X 297     215.255 221.234 319.092  1.00  0.00           H
ATOM   4793  CB  ALA X 297     216.528 219.932 320.315  1.00  0.00           C
ATOM   4794  HB1 ALA X 297     217.446 219.924 319.727  1.00  0.00           H
ATOM   4795  HB2 ALA X 297     216.002 219.041 319.970  1.00  0.00           H
ATOM   4796  HB3 ALA X 297     216.798 219.797 321.362  1.00  0.00           H
ATOM   4797  C   ALA X 297     214.508 221.305 321.014  1.00  0.00           C
ATOM   4798  O   ALA X 297     213.339 221.290 320.633  1.00  0.00           O
ATOM   4799  N   GLY X 298     214.851 221.414 322.353  1.00  0.00           N
ATOM   4800  H   GLY X 298     215.803 221.499 322.681  1.00  0.00           H
ATOM   4801  CA  GLY X 298     213.888 221.478 323.424  1.00  0.00           C
ATOM   4802  HA2 GLY X 298     213.385 220.528 323.607  1.00  0.00           H
ATOM   4803  HA3 GLY X 298     214.396 221.648 324.374  1.00  0.00           H
ATOM   4804  C   GLY X 298     212.798 222.557 323.314  1.00  0.00           C
ATOM   4805  O   GLY X 298     211.602 222.261 323.419  1.00  0.00           O
ATOM   4806  N   THR X 299     213.149 223.817 323.004  1.00  0.00           N
ATOM   4807  H   THR X 299     214.136 224.017 322.928  1.00  0.00           H
ATOM   4808  CA  THR X 299     212.266 224.887 322.694  1.00  0.00           C
ATOM   4809  HA  THR X 299     211.831 225.043 323.681  1.00  0.00           H
ATOM   4810  CB  THR X 299     213.004 226.210 322.426  1.00  0.00           C
ATOM   4811  HB  THR X 299     213.746 226.091 321.636  1.00  0.00           H
ATOM   4812  CG2 THR X 299     211.993 227.279 321.972  1.00  0.00           C
ATOM   4813 HG21 THR X 299     211.768 227.207 320.907  1.00  0.00           H
ATOM   4814 HG22 THR X 299     212.513 228.211 322.193  1.00  0.00           H
ATOM   4815 HG23 THR X 299     211.140 227.315 322.650  1.00  0.00           H
ATOM   4816  OG1 THR X 299     213.775 226.654 323.505  1.00  0.00           O
ATOM   4817  HG1 THR X 299     214.581 226.139 323.596  1.00  0.00           H
ATOM   4818  C   THR X 299     211.224 224.473 321.617  1.00  0.00           C
ATOM   4819  O   THR X 299     210.018 224.703 321.789  1.00  0.00           O
ATOM   4820  N   GLU X 300     211.664 223.711 320.623  1.00  0.00           N
ATOM   4821  H   GLU X 300     212.613 223.365 320.615  1.00  0.00           H
ATOM   4822  CA  GLU X 300     210.684 223.342 319.541  1.00  0.00           C
ATOM   4823  HA  GLU X 300     210.063 224.222 319.374  1.00  0.00           H
ATOM   4824  CB  GLU X 300     211.453 223.114 318.253  1.00  0.00           C
ATOM   4825  HB2 GLU X 300     212.057 223.994 318.032  1.00  0.00           H
ATOM   4826  HB3 GLU X 300     212.162 222.316 318.472  1.00  0.00           H
ATOM   4827  CG  GLU X 300     210.728 222.835 316.964  1.00  0.00           C
ATOM   4828  HG2 GLU X 300     211.454 222.542 316.205  1.00  0.00           H
ATOM   4829  HG3 GLU X 300     210.084 221.971 317.122  1.00  0.00           H
ATOM   4830  CD  GLU X 300     209.843 223.943 316.367  1.00  0.00           C
ATOM   4831  OE1 GLU X 300     209.086 224.605 317.156  1.00  0.00           O
ATOM   4832  OE2 GLU X 300     210.000 224.202 315.191  1.00  0.00           O
ATOM   4833  C   GLU X 300     209.811 222.049 319.771  1.00  0.00           C
ATOM   4834  O   GLU X 300     208.627 221.990 319.464  1.00  0.00           O
ATOM   4835  N   THR X 301     210.324 221.084 320.537  1.00  0.00           N
ATOM   4836  H   THR X 301     211.288 221.203 320.813  1.00  0.00           H
ATOM   4837  CA  THR X 301     209.631 219.798 320.789  1.00  0.00           C
ATOM   4838  HA  THR X 301     209.164 219.436 319.873  1.00  0.00           H
ATOM   4839  CB  THR X 301     210.617 218.733 321.265  1.00  0.00           C
ATOM   4840  HB  THR X 301     210.079 217.934 321.775  1.00  0.00           H
ATOM   4841  CG2 THR X 301     211.558 218.202 320.246  1.00  0.00           C
ATOM   4842 HG21 THR X 301     212.471 218.796 320.256  1.00  0.00           H
ATOM   4843 HG22 THR X 301     211.133 218.038 319.256  1.00  0.00           H
ATOM   4844 HG23 THR X 301     211.767 217.222 320.677  1.00  0.00           H
ATOM   4845  OG1 THR X 301     211.448 219.220 322.348  1.00  0.00           O
ATOM   4846  HG1 THR X 301     211.742 218.466 322.864  1.00  0.00           H
ATOM   4847  C   THR X 301     208.458 219.904 321.746  1.00  0.00           C
ATOM   4848  O   THR X 301     207.342 219.537 321.366  1.00  0.00           O
ATOM   4849  N   THR X 302     208.650 220.629 322.801  1.00  0.00           N
ATOM   4850  H   THR X 302     209.588 220.954 322.988  1.00  0.00           H
ATOM   4851  CA  THR X 302     207.598 220.989 323.746  1.00  0.00           C
ATOM   4852  HA  THR X 302     206.945 220.168 324.041  1.00  0.00           H
ATOM   4853  CB  THR X 302     208.232 221.566 325.023  1.00  0.00           C
ATOM   4854  HB  THR X 302     207.415 222.016 325.588  1.00  0.00           H
ATOM   4855  CG2 THR X 302     208.733 220.459 325.905  1.00  0.00           C
ATOM   4856 HG21 THR X 302     209.591 219.981 325.432  1.00  0.00           H
ATOM   4857 HG22 THR X 302     207.991 219.661 325.898  1.00  0.00           H
ATOM   4858 HG23 THR X 302     208.977 220.742 326.929  1.00  0.00           H
ATOM   4859  OG1 THR X 302     209.172 222.638 324.900  1.00  0.00           O
ATOM   4860  HG1 THR X 302     209.956 222.360 324.421  1.00  0.00           H
ATOM   4861  C   THR X 302     206.708 222.079 323.219  1.00  0.00           C
ATOM   4862  O   THR X 302     205.486 222.124 323.434  1.00  0.00           O
ATOM   4863  N   SER X 303     207.243 222.931 322.313  1.00  0.00           N
ATOM   4864  H   SER X 303     208.201 222.773 322.035  1.00  0.00           H
ATOM   4865  CA  SER X 303     206.447 223.941 321.548  1.00  0.00           C
ATOM   4866  HA  SER X 303     205.804 224.549 322.184  1.00  0.00           H
ATOM   4867  CB  SER X 303     207.206 224.879 320.754  1.00  0.00           C
ATOM   4868  HB2 SER X 303     207.753 225.568 321.397  1.00  0.00           H
ATOM   4869  HB3 SER X 303     207.960 224.401 320.129  1.00  0.00           H
ATOM   4870  OG  SER X 303     206.421 225.874 320.122  1.00  0.00           O
ATOM   4871  HG  SER X 303     205.904 226.348 320.778  1.00  0.00           H
ATOM   4872  C   SER X 303     205.409 223.260 320.640  1.00  0.00           C
ATOM   4873  O   SER X 303     204.236 223.523 320.617  1.00  0.00           O
ATOM   4874  N   THR X 304     205.869 222.375 319.784  1.00  0.00           N
ATOM   4875  H   THR X 304     206.873 222.277 319.740  1.00  0.00           H
ATOM   4876  CA  THR X 304     205.128 221.625 318.845  1.00  0.00           C
ATOM   4877  HA  THR X 304     204.526 222.303 318.240  1.00  0.00           H
ATOM   4878  CB  THR X 304     206.106 220.833 317.999  1.00  0.00           C
ATOM   4879  HB  THR X 304     206.676 220.150 318.628  1.00  0.00           H
ATOM   4880  CG2 THR X 304     205.370 220.066 316.931  1.00  0.00           C
ATOM   4881 HG21 THR X 304     206.044 219.701 316.156  1.00  0.00           H
ATOM   4882 HG22 THR X 304     204.637 220.703 316.436  1.00  0.00           H
ATOM   4883 HG23 THR X 304     204.921 219.186 317.393  1.00  0.00           H
ATOM   4884  OG1 THR X 304     207.081 221.649 317.361  1.00  0.00           O
ATOM   4885  HG1 THR X 304     207.797 221.858 317.965  1.00  0.00           H
ATOM   4886  C   THR X 304     204.137 220.779 319.514  1.00  0.00           C
ATOM   4887  O   THR X 304     203.009 220.737 319.007  1.00  0.00           O
ATOM   4888  N   THR X 305     204.438 220.174 320.660  1.00  0.00           N
ATOM   4889  H   THR X 305     205.392 220.158 320.990  1.00  0.00           H
ATOM   4890  CA  THR X 305     203.450 219.452 321.505  1.00  0.00           C
ATOM   4891  HA  THR X 305     202.990 218.682 320.887  1.00  0.00           H
ATOM   4892  CB  THR X 305     204.127 218.774 322.683  1.00  0.00           C
ATOM   4893  HB  THR X 305     204.635 219.435 323.386  1.00  0.00           H
ATOM   4894  CG2 THR X 305     203.045 217.995 323.513  1.00  0.00           C
ATOM   4895 HG21 THR X 305     203.524 217.231 324.125  1.00  0.00           H
ATOM   4896 HG22 THR X 305     202.331 217.561 322.814  1.00  0.00           H
ATOM   4897 HG23 THR X 305     202.517 218.742 324.106  1.00  0.00           H
ATOM   4898  OG1 THR X 305     204.996 217.882 322.135  1.00  0.00           O
ATOM   4899  HG1 THR X 305     205.842 218.284 321.929  1.00  0.00           H
ATOM   4900  C   THR X 305     202.378 220.396 322.025  1.00  0.00           C
ATOM   4901  O   THR X 305     201.201 220.058 321.873  1.00  0.00           O
ATOM   4902  N   LEU X 306     202.761 221.534 322.622  1.00  0.00           N
ATOM   4903  H   LEU X 306     203.746 221.757 322.641  1.00  0.00           H
ATOM   4904  CA  LEU X 306     201.734 222.485 323.232  1.00  0.00           C
ATOM   4905  HA  LEU X 306     201.171 221.924 323.978  1.00  0.00           H
ATOM   4906  CB  LEU X 306     202.493 223.637 323.974  1.00  0.00           C
ATOM   4907  HB2 LEU X 306     203.388 223.891 323.406  1.00  0.00           H
ATOM   4908  HB3 LEU X 306     201.854 224.513 324.082  1.00  0.00           H
ATOM   4909  CG  LEU X 306     202.917 223.126 325.347  1.00  0.00           C
ATOM   4910  HG  LEU X 306     203.413 222.162 325.232  1.00  0.00           H
ATOM   4911  CD1 LEU X 306     203.912 224.116 325.942  1.00  0.00           C
ATOM   4912 HD11 LEU X 306     203.878 223.954 327.020  1.00  0.00           H
ATOM   4913 HD12 LEU X 306     204.903 224.014 325.500  1.00  0.00           H
ATOM   4914 HD13 LEU X 306     203.523 225.124 325.795  1.00  0.00           H
ATOM   4915  CD2 LEU X 306     201.728 223.149 326.341  1.00  0.00           C
ATOM   4916 HD21 LEU X 306     200.999 222.420 325.987  1.00  0.00           H
ATOM   4917 HD22 LEU X 306     202.052 222.978 327.367  1.00  0.00           H
ATOM   4918 HD23 LEU X 306     201.311 224.156 326.353  1.00  0.00           H
ATOM   4919  C   LEU X 306     200.821 223.054 322.126  1.00  0.00           C
ATOM   4920  O   LEU X 306     199.587 223.122 322.292  1.00  0.00           O
ATOM   4921  N   ARG X 307     201.338 223.378 320.924  1.00  0.00           N
ATOM   4922  H   ARG X 307     202.346 223.354 320.867  1.00  0.00           H
ATOM   4923  CA  ARG X 307     200.469 223.803 319.835  1.00  0.00           C
ATOM   4924  HA  ARG X 307     199.889 224.711 320.000  1.00  0.00           H
ATOM   4925  CB  ARG X 307     201.354 224.251 318.651  1.00  0.00           C
ATOM   4926  HB2 ARG X 307     201.966 223.394 318.369  1.00  0.00           H
ATOM   4927  HB3 ARG X 307     200.715 224.375 317.777  1.00  0.00           H
ATOM   4928  CG  ARG X 307     202.291 225.397 318.824  1.00  0.00           C
ATOM   4929  HG2 ARG X 307     201.697 226.301 318.959  1.00  0.00           H
ATOM   4930  HG3 ARG X 307     202.876 225.309 319.739  1.00  0.00           H
ATOM   4931  CD  ARG X 307     203.355 225.300 317.652  1.00  0.00           C
ATOM   4932  HD2 ARG X 307     203.960 226.176 317.885  1.00  0.00           H
ATOM   4933  HD3 ARG X 307     203.831 224.320 317.652  1.00  0.00           H
ATOM   4934  NE  ARG X 307     202.869 225.520 316.283  1.00  0.00           N
ATOM   4935  HE  ARG X 307     201.971 225.971 316.182  1.00  0.00           H
ATOM   4936  CZ  ARG X 307     203.572 225.385 315.176  1.00  0.00           C
ATOM   4937  NH1 ARG X 307     202.961 225.576 314.052  1.00  0.00           N
ATOM   4938 HH11 ARG X 307     201.984 225.807 313.943  1.00  0.00           H
ATOM   4939 HH12 ARG X 307     203.530 225.344 313.250  1.00  0.00           H
ATOM   4940  NH2 ARG X 307     204.751 224.905 315.138  1.00  0.00           N
ATOM   4941 HH21 ARG X 307     205.248 224.721 315.998  1.00  0.00           H
ATOM   4942 HH22 ARG X 307     205.236 225.128 314.281  1.00  0.00           H
ATOM   4943  C   ARG X 307     199.518 222.726 319.341  1.00  0.00           C
ATOM   4944  O   ARG X 307     198.374 223.068 318.997  1.00  0.00           O
ATOM   4945  N   TYR X 308     199.902 221.414 319.292  1.00  0.00           N
ATOM   4946  H   TYR X 308     200.859 221.107 319.392  1.00  0.00           H
ATOM   4947  CA  TYR X 308     199.024 220.259 318.998  1.00  0.00           C
ATOM   4948  HA  TYR X 308     198.488 220.612 318.117  1.00  0.00           H
ATOM   4949  CB  TYR X 308     199.975 219.016 318.707  1.00  0.00           C
ATOM   4950  HB2 TYR X 308     201.003 219.226 319.001  1.00  0.00           H
ATOM   4951  HB3 TYR X 308     199.610 218.165 319.281  1.00  0.00           H
ATOM   4952  CG  TYR X 308     199.897 218.473 317.214  1.00  0.00           C
ATOM   4953  CD1 TYR X 308     198.737 217.909 316.701  1.00  0.00           C
ATOM   4954  HD1 TYR X 308     197.886 217.908 317.365  1.00  0.00           H
ATOM   4955  CE1 TYR X 308     198.769 217.269 315.416  1.00  0.00           C
ATOM   4956  HE1 TYR X 308     197.877 216.855 314.969  1.00  0.00           H
ATOM   4957  CZ  TYR X 308     199.930 217.175 314.706  1.00  0.00           C
ATOM   4958  OH  TYR X 308     199.987 216.552 313.476  1.00  0.00           O
ATOM   4959  HH  TYR X 308     199.082 216.345 313.233  1.00  0.00           H
ATOM   4960  CE2 TYR X 308     201.090 217.801 315.221  1.00  0.00           C
ATOM   4961  HE2 TYR X 308     202.027 217.620 314.716  1.00  0.00           H
ATOM   4962  CD2 TYR X 308     201.111 218.453 316.480  1.00  0.00           C
ATOM   4963  HD2 TYR X 308     202.034 218.863 316.861  1.00  0.00           H
ATOM   4964  C   TYR X 308     198.016 219.890 320.097  1.00  0.00           C
ATOM   4965  O   TYR X 308     196.912 219.346 319.763  1.00  0.00           O
ATOM   4966  N   ALA X 309     198.303 220.014 321.428  1.00  0.00           N
ATOM   4967  H   ALA X 309     199.153 220.502 321.673  1.00  0.00           H
ATOM   4968  CA  ALA X 309     197.449 219.637 322.544  1.00  0.00           C
ATOM   4969  HA  ALA X 309     197.255 218.570 322.436  1.00  0.00           H
ATOM   4970  CB  ALA X 309     198.133 219.852 323.890  1.00  0.00           C
ATOM   4971  HB1 ALA X 309     199.214 219.738 323.803  1.00  0.00           H
ATOM   4972  HB2 ALA X 309     197.788 219.129 324.628  1.00  0.00           H
ATOM   4973  HB3 ALA X 309     197.881 220.891 324.101  1.00  0.00           H
ATOM   4974  C   ALA X 309     196.198 220.521 322.436  1.00  0.00           C
ATOM   4975  O   ALA X 309     195.009 220.101 322.453  1.00  0.00           O
ATOM   4976  N   LEU X 310     196.420 221.835 322.300  1.00  0.00           N
ATOM   4977  H   LEU X 310     197.380 222.145 322.250  1.00  0.00           H
ATOM   4978  CA  LEU X 310     195.253 222.739 322.140  1.00  0.00           C
ATOM   4979  HA  LEU X 310     194.501 222.672 322.926  1.00  0.00           H
ATOM   4980  CB  LEU X 310     195.763 224.216 322.180  1.00  0.00           C
ATOM   4981  HB2 LEU X 310     196.621 224.300 321.513  1.00  0.00           H
ATOM   4982  HB3 LEU X 310     195.007 224.867 321.740  1.00  0.00           H
ATOM   4983  CG  LEU X 310     196.288 224.794 323.451  1.00  0.00           C
ATOM   4984  HG  LEU X 310     197.265 224.362 323.665  1.00  0.00           H
ATOM   4985  CD1 LEU X 310     196.170 226.323 323.478  1.00  0.00           C
ATOM   4986 HD11 LEU X 310     196.467 226.675 322.490  1.00  0.00           H
ATOM   4987 HD12 LEU X 310     195.141 226.601 323.704  1.00  0.00           H
ATOM   4988 HD13 LEU X 310     196.841 226.713 324.244  1.00  0.00           H
ATOM   4989  CD2 LEU X 310     195.426 224.308 324.635  1.00  0.00           C
ATOM   4990 HD21 LEU X 310     194.346 224.356 324.494  1.00  0.00           H
ATOM   4991 HD22 LEU X 310     195.739 223.282 324.831  1.00  0.00           H
ATOM   4992 HD23 LEU X 310     195.582 224.875 325.552  1.00  0.00           H
ATOM   4993  C   LEU X 310     194.421 222.519 320.834  1.00  0.00           C
ATOM   4994  O   LEU X 310     193.199 222.591 320.951  1.00  0.00           O
ATOM   4995  N   LEU X 311     194.977 222.150 319.703  1.00  0.00           N
ATOM   4996  H   LEU X 311     195.965 222.008 319.854  1.00  0.00           H
ATOM   4997  CA  LEU X 311     194.278 221.630 318.509  1.00  0.00           C
ATOM   4998  HA  LEU X 311     193.524 222.378 318.265  1.00  0.00           H
ATOM   4999  CB  LEU X 311     195.193 221.501 317.317  1.00  0.00           C
ATOM   5000  HB2 LEU X 311     195.544 222.528 317.216  1.00  0.00           H
ATOM   5001  HB3 LEU X 311     196.068 220.914 317.596  1.00  0.00           H
ATOM   5002  CG  LEU X 311     194.589 221.097 315.919  1.00  0.00           C
ATOM   5003  HG  LEU X 311     194.148 220.105 316.017  1.00  0.00           H
ATOM   5004  CD1 LEU X 311     193.476 221.972 315.365  1.00  0.00           C
ATOM   5005 HD11 LEU X 311     192.561 221.869 315.949  1.00  0.00           H
ATOM   5006 HD12 LEU X 311     193.837 222.999 315.316  1.00  0.00           H
ATOM   5007 HD13 LEU X 311     193.204 221.540 314.402  1.00  0.00           H
ATOM   5008  CD2 LEU X 311     195.739 221.196 314.829  1.00  0.00           C
ATOM   5009 HD21 LEU X 311     196.560 220.519 315.067  1.00  0.00           H
ATOM   5010 HD22 LEU X 311     195.284 221.040 313.851  1.00  0.00           H
ATOM   5011 HD23 LEU X 311     196.129 222.206 314.952  1.00  0.00           H
ATOM   5012  C   LEU X 311     193.503 220.330 318.844  1.00  0.00           C
ATOM   5013  O   LEU X 311     192.336 220.287 318.440  1.00  0.00           O
ATOM   5014  N   LEU X 312     194.052 219.273 319.431  1.00  0.00           N
ATOM   5015  H   LEU X 312     194.913 219.327 319.957  1.00  0.00           H
ATOM   5016  CA  LEU X 312     193.279 218.054 319.652  1.00  0.00           C
ATOM   5017  HA  LEU X 312     192.812 217.690 318.737  1.00  0.00           H
ATOM   5018  CB  LEU X 312     194.254 216.953 320.162  1.00  0.00           C
ATOM   5019  HB2 LEU X 312     194.778 217.511 320.938  1.00  0.00           H
ATOM   5020  HB3 LEU X 312     193.720 216.058 320.482  1.00  0.00           H
ATOM   5021  CG  LEU X 312     195.238 216.486 319.103  1.00  0.00           C
ATOM   5022  HG  LEU X 312     195.468 217.273 318.385  1.00  0.00           H
ATOM   5023  CD1 LEU X 312     196.501 215.948 319.699  1.00  0.00           C
ATOM   5024 HD11 LEU X 312     197.058 216.611 320.361  1.00  0.00           H
ATOM   5025 HD12 LEU X 312     196.251 215.204 320.455  1.00  0.00           H
ATOM   5026 HD13 LEU X 312     197.209 215.667 318.918  1.00  0.00           H
ATOM   5027  CD2 LEU X 312     194.563 215.432 318.208  1.00  0.00           C
ATOM   5028 HD21 LEU X 312     193.689 215.902 317.758  1.00  0.00           H
ATOM   5029 HD22 LEU X 312     195.226 215.194 317.377  1.00  0.00           H
ATOM   5030 HD23 LEU X 312     194.264 214.540 318.758  1.00  0.00           H
ATOM   5031  C   LEU X 312     192.102 218.321 320.607  1.00  0.00           C
ATOM   5032  O   LEU X 312     190.979 217.956 320.303  1.00  0.00           O
ATOM   5033  N   LEU X 313     192.280 219.097 321.687  1.00  0.00           N
ATOM   5034  H   LEU X 313     193.211 219.453 321.854  1.00  0.00           H
ATOM   5035  CA  LEU X 313     191.259 219.503 322.649  1.00  0.00           C
ATOM   5036  HA  LEU X 313     190.677 218.656 323.012  1.00  0.00           H
ATOM   5037  CB  LEU X 313     191.979 220.065 323.929  1.00  0.00           C
ATOM   5038  HB2 LEU X 313     192.681 220.803 323.542  1.00  0.00           H
ATOM   5039  HB3 LEU X 313     191.314 220.587 324.617  1.00  0.00           H
ATOM   5040  CG  LEU X 313     192.929 219.013 324.658  1.00  0.00           C
ATOM   5041  HG  LEU X 313     193.417 218.377 323.919  1.00  0.00           H
ATOM   5042  CD1 LEU X 313     193.890 219.792 325.479  1.00  0.00           C
ATOM   5043 HD11 LEU X 313     194.437 219.072 326.088  1.00  0.00           H
ATOM   5044 HD12 LEU X 313     194.547 220.256 324.744  1.00  0.00           H
ATOM   5045 HD13 LEU X 313     193.399 220.554 326.085  1.00  0.00           H
ATOM   5046  CD2 LEU X 313     192.141 218.156 325.621  1.00  0.00           C
ATOM   5047 HD21 LEU X 313     192.707 217.357 326.102  1.00  0.00           H
ATOM   5048 HD22 LEU X 313     191.868 218.838 326.426  1.00  0.00           H
ATOM   5049 HD23 LEU X 313     191.286 217.649 325.174  1.00  0.00           H
ATOM   5050  C   LEU X 313     190.205 220.395 322.013  1.00  0.00           C
ATOM   5051  O   LEU X 313     189.151 220.639 322.610  1.00  0.00           O
ATOM   5052  N   LEU X 314     190.484 221.063 320.892  1.00  0.00           N
ATOM   5053  H   LEU X 314     191.401 220.913 320.496  1.00  0.00           H
ATOM   5054  CA  LEU X 314     189.489 221.764 320.103  1.00  0.00           C
ATOM   5055  HA  LEU X 314     188.841 222.372 320.734  1.00  0.00           H
ATOM   5056  CB  LEU X 314     190.198 222.829 319.189  1.00  0.00           C
ATOM   5057  HB2 LEU X 314     191.157 222.421 318.869  1.00  0.00           H
ATOM   5058  HB3 LEU X 314     189.579 223.058 318.321  1.00  0.00           H
ATOM   5059  CG  LEU X 314     190.475 224.253 319.804  1.00  0.00           C
ATOM   5060  HG  LEU X 314     191.258 224.242 320.562  1.00  0.00           H
ATOM   5061  CD1 LEU X 314     191.002 225.128 318.639  1.00  0.00           C
ATOM   5062 HD11 LEU X 314     191.446 226.054 319.004  1.00  0.00           H
[truncated: 6,519,796 more chars]
