# Supplementary material for: Differing Membrane Interactions of Two Highly Similar Drug-Metabolizing Cytochrome P450 Isoforms: CYP 2C9 and CYP 2C19
Source: Int J Mol Sci. 2019 Sep 4;20(18):4328. doi: 10.3390/ijms20184328 (PMC6770661; doi:10.3390/ijms20184328)
Supplement: Supplementary file 1 [file ijms-20-04328-s001.zip › CYP_2C9_2C19_pdb/2C19-SIM2-2641_noWAT.pdb]

ATOM      1  N   MET X   1     196.108 190.894 232.800  0.00  0.00           N  
ATOM      2  CA  MET X   1     195.792 189.614 233.468  0.00  0.00           C  
ATOM      3  C   MET X   1     194.366 189.232 233.409  0.00  0.00           C  
ATOM      4  O   MET X   1     193.420 189.945 233.821  0.00  0.00           O  
ATOM      5  CB  MET X   1     196.230 189.455 234.918  0.00  0.00           C  
ATOM      6  CG  MET X   1     196.099 188.023 235.509  0.00  0.00           C  
ATOM      7  SD  MET X   1     196.172 188.003 237.365  0.00  0.00           S  
ATOM      8  CE  MET X   1     197.900 188.364 237.695  0.00  0.00           C  
ATOM      9  HA  MET X   1     196.292 188.827 232.904  0.00  0.00           H  
ATOM     10  HB2 MET X   1     197.259 189.809 234.987  0.00  0.00           H  
ATOM     11  HB3 MET X   1     195.544 190.079 235.491  0.00  0.00           H  
ATOM     12  HG2 MET X   1     195.200 187.482 235.216  0.00  0.00           H  
ATOM     13  HG3 MET X   1     196.943 187.431 235.154  0.00  0.00           H  
ATOM     14  HE1 MET X   1     198.125 189.306 237.193  0.00  0.00           H  
ATOM     15  HE2 MET X   1     198.006 188.479 238.774  0.00  0.00           H  
ATOM     16  HE3 MET X   1     198.655 187.670 237.326  0.00  0.00           H  
ATOM     17  H1  MET X   1     197.098 191.001 232.632  0.00  0.00           H  
ATOM     18  H2  MET X   1     195.884 191.703 233.362  0.00  0.00           H  
ATOM     19  H3  MET X   1     195.596 190.924 231.930  0.00  0.00           H  
ATOM     20  N   ASP X   2     194.088 188.054 232.923  0.00  0.00           N  
ATOM     21  CA  ASP X   2     192.870 187.608 232.320  0.00  0.00           C  
ATOM     22  C   ASP X   2     191.946 187.051 233.480  0.00  0.00           C  
ATOM     23  O   ASP X   2     192.484 186.382 234.423  0.00  0.00           O  
ATOM     24  CB  ASP X   2     193.104 186.507 231.227  0.00  0.00           C  
ATOM     25  CG  ASP X   2     191.790 185.837 230.794  0.00  0.00           C  
ATOM     26  OD1 ASP X   2     191.566 185.852 229.561  0.00  0.00           O  
ATOM     27  OD2 ASP X   2     191.229 184.988 231.547  0.00  0.00           O1-
ATOM     28  H   ASP X   2     194.872 187.443 232.747  0.00  0.00           H  
ATOM     29  HA  ASP X   2     192.364 188.445 231.838  0.00  0.00           H  
ATOM     30  HB2 ASP X   2     193.531 187.125 230.437  0.00  0.00           H  
ATOM     31  HB3 ASP X   2     193.676 185.693 231.671  0.00  0.00           H  
ATOM     32  N   PRO X   3     190.632 187.299 233.515  0.00  0.00           N  
ATOM     33  CA  PRO X   3     189.810 186.916 234.613  0.00  0.00           C  
ATOM     34  C   PRO X   3     189.768 185.432 234.908  0.00  0.00           C  
ATOM     35  O   PRO X   3     189.461 185.177 236.082  0.00  0.00           O  
ATOM     36  CB  PRO X   3     188.458 187.627 234.289  0.00  0.00           C  
ATOM     37  CG  PRO X   3     188.467 187.805 232.778  0.00  0.00           C  
ATOM     38  CD  PRO X   3     189.886 187.920 232.395  0.00  0.00           C  
ATOM     39  HA  PRO X   3     190.345 187.283 235.489  0.00  0.00           H  
ATOM     40  HB2 PRO X   3     187.610 187.028 234.621  0.00  0.00           H  
ATOM     41  HB3 PRO X   3     188.393 188.617 234.740  0.00  0.00           H  
ATOM     42  HG2 PRO X   3     188.007 186.979 232.236  0.00  0.00           H  
ATOM     43  HG3 PRO X   3     187.833 188.628 232.447  0.00  0.00           H  
ATOM     44  HD2 PRO X   3     189.952 187.439 231.419  0.00  0.00           H  
ATOM     45  HD3 PRO X   3     190.134 188.966 232.214  0.00  0.00           H  
ATOM     46  N   PHE X   4     190.194 184.500 234.101  0.00  0.00           N  
ATOM     47  CA  PHE X   4     190.348 183.118 234.606  0.00  0.00           C  
ATOM     48  C   PHE X   4     191.552 182.960 235.624  0.00  0.00           C  
ATOM     49  O   PHE X   4     191.356 182.278 236.594  0.00  0.00           O  
ATOM     50  CB  PHE X   4     190.490 182.143 233.403  0.00  0.00           C  
ATOM     51  CG  PHE X   4     190.347 180.700 233.791  0.00  0.00           C  
ATOM     52  CD1 PHE X   4     189.030 180.125 233.944  0.00  0.00           C  
ATOM     53  CD2 PHE X   4     191.511 179.899 234.046  0.00  0.00           C  
ATOM     54  CE1 PHE X   4     188.871 178.829 234.389  0.00  0.00           C  
ATOM     55  CE2 PHE X   4     191.320 178.618 234.613  0.00  0.00           C  
ATOM     56  CZ  PHE X   4     190.006 178.133 234.781  0.00  0.00           C  
ATOM     57  H   PHE X   4     190.369 184.767 233.143  0.00  0.00           H  
ATOM     58  HA  PHE X   4     189.428 182.809 235.103  0.00  0.00           H  
ATOM     59  HB2 PHE X   4     189.686 182.483 232.750  0.00  0.00           H  
ATOM     60  HB3 PHE X   4     191.459 182.353 232.951  0.00  0.00           H  
ATOM     61  HD1 PHE X   4     188.180 180.706 233.617  0.00  0.00           H  
ATOM     62  HD2 PHE X   4     192.518 180.226 233.836  0.00  0.00           H  
ATOM     63  HE1 PHE X   4     187.873 178.416 234.408  0.00  0.00           H  
ATOM     64  HE2 PHE X   4     192.169 178.059 234.979  0.00  0.00           H  
ATOM     65  HZ  PHE X   4     189.839 177.174 235.248  0.00  0.00           H  
ATOM     66  N   VAL X   5     192.660 183.580 235.337  0.00  0.00           N  
ATOM     67  CA  VAL X   5     193.790 183.620 236.236  0.00  0.00           C  
ATOM     68  C   VAL X   5     193.438 184.328 237.546  0.00  0.00           C  
ATOM     69  O   VAL X   5     193.845 183.875 238.591  0.00  0.00           O  
ATOM     70  CB  VAL X   5     195.096 184.153 235.474  0.00  0.00           C  
ATOM     71  CG1 VAL X   5     196.391 184.220 236.292  0.00  0.00           C  
ATOM     72  CG2 VAL X   5     195.270 183.291 234.225  0.00  0.00           C  
ATOM     73  H   VAL X   5     192.688 184.252 234.583  0.00  0.00           H  
ATOM     74  HA  VAL X   5     194.073 182.595 236.477  0.00  0.00           H  
ATOM     75  HB  VAL X   5     194.848 185.187 235.234  0.00  0.00           H  
ATOM     76 HG11 VAL X   5     196.213 184.910 237.118  0.00  0.00           H  
ATOM     77 HG12 VAL X   5     196.731 183.249 236.651  0.00  0.00           H  
ATOM     78 HG13 VAL X   5     197.253 184.623 235.760  0.00  0.00           H  
ATOM     79 HG21 VAL X   5     195.249 182.226 234.458  0.00  0.00           H  
ATOM     80 HG22 VAL X   5     196.267 183.571 233.887  0.00  0.00           H  
ATOM     81 HG23 VAL X   5     194.481 183.510 233.504  0.00  0.00           H  
ATOM     82  N   VAL X   6     192.710 185.479 237.538  0.00  0.00           N  
ATOM     83  CA  VAL X   6     192.214 186.255 238.715  0.00  0.00           C  
ATOM     84  C   VAL X   6     191.166 185.397 239.447  0.00  0.00           C  
ATOM     85  O   VAL X   6     191.323 185.303 240.699  0.00  0.00           O  
ATOM     86  CB  VAL X   6     191.522 187.547 238.374  0.00  0.00           C  
ATOM     87  CG1 VAL X   6     191.108 188.250 239.704  0.00  0.00           C  
ATOM     88  CG2 VAL X   6     192.528 188.534 237.624  0.00  0.00           C  
ATOM     89  H   VAL X   6     192.612 185.977 236.665  0.00  0.00           H  
ATOM     90  HA  VAL X   6     193.086 186.419 239.348  0.00  0.00           H  
ATOM     91  HB  VAL X   6     190.622 187.315 237.805  0.00  0.00           H  
ATOM     92 HG11 VAL X   6     190.736 189.230 239.405  0.00  0.00           H  
ATOM     93 HG12 VAL X   6     190.261 187.773 240.197  0.00  0.00           H  
ATOM     94 HG13 VAL X   6     191.999 188.341 240.325  0.00  0.00           H  
ATOM     95 HG21 VAL X   6     191.971 189.452 237.437  0.00  0.00           H  
ATOM     96 HG22 VAL X   6     192.835 188.116 236.665  0.00  0.00           H  
ATOM     97 HG23 VAL X   6     193.410 188.813 238.200  0.00  0.00           H  
ATOM     98  N   LEU X   7     190.246 184.630 238.816  0.00  0.00           N  
ATOM     99  CA  LEU X   7     189.307 183.707 239.468  0.00  0.00           C  
ATOM    100  C   LEU X   7     190.133 182.660 240.128  0.00  0.00           C  
ATOM    101  O   LEU X   7     189.824 182.336 241.240  0.00  0.00           O  
ATOM    102  CB  LEU X   7     188.399 183.059 238.340  0.00  0.00           C  
ATOM    103  CG  LEU X   7     187.536 181.866 238.923  0.00  0.00           C  
ATOM    104  CD1 LEU X   7     186.683 182.325 240.064  0.00  0.00           C  
ATOM    105  CD2 LEU X   7     186.738 181.275 237.744  0.00  0.00           C  
ATOM    106  H   LEU X   7     190.143 184.652 237.811  0.00  0.00           H  
ATOM    107  HA  LEU X   7     188.719 184.217 240.231  0.00  0.00           H  
ATOM    108  HB2 LEU X   7     187.793 183.905 238.016  0.00  0.00           H  
ATOM    109  HB3 LEU X   7     189.035 182.722 237.522  0.00  0.00           H  
ATOM    110  HG  LEU X   7     188.173 181.016 239.168  0.00  0.00           H  
ATOM    111 HD11 LEU X   7     186.081 181.466 240.363  0.00  0.00           H  
ATOM    112 HD12 LEU X   7     186.057 183.123 239.667  0.00  0.00           H  
ATOM    113 HD13 LEU X   7     187.331 182.644 240.881  0.00  0.00           H  
ATOM    114 HD21 LEU X   7     186.195 182.053 237.208  0.00  0.00           H  
ATOM    115 HD22 LEU X   7     187.363 180.746 237.025  0.00  0.00           H  
ATOM    116 HD23 LEU X   7     185.963 180.607 238.121  0.00  0.00           H  
ATOM    117  N   VAL X   8     191.185 182.142 239.469  0.00  0.00           N  
ATOM    118  CA  VAL X   8     192.027 181.037 240.045  0.00  0.00           C  
ATOM    119  C   VAL X   8     192.827 181.559 241.197  0.00  0.00           C  
ATOM    120  O   VAL X   8     192.782 180.926 242.270  0.00  0.00           O  
ATOM    121  CB  VAL X   8     192.896 180.356 238.934  0.00  0.00           C  
ATOM    122  CG1 VAL X   8     193.982 179.488 239.506  0.00  0.00           C  
ATOM    123  CG2 VAL X   8     192.020 179.348 238.191  0.00  0.00           C  
ATOM    124  H   VAL X   8     191.330 182.497 238.534  0.00  0.00           H  
ATOM    125  HA  VAL X   8     191.396 180.214 240.380  0.00  0.00           H  
ATOM    126  HB  VAL X   8     193.337 181.077 238.246  0.00  0.00           H  
ATOM    127 HG11 VAL X   8     194.704 180.022 240.125  0.00  0.00           H  
ATOM    128 HG12 VAL X   8     193.665 178.664 240.146  0.00  0.00           H  
ATOM    129 HG13 VAL X   8     194.582 179.089 238.689  0.00  0.00           H  
ATOM    130 HG21 VAL X   8     192.435 178.975 237.255  0.00  0.00           H  
ATOM    131 HG22 VAL X   8     191.042 179.762 237.947  0.00  0.00           H  
ATOM    132 HG23 VAL X   8     191.857 178.422 238.744  0.00  0.00           H  
ATOM    133  N   LEU X   9     193.367 182.788 241.170  0.00  0.00           N  
ATOM    134  CA  LEU X   9     193.975 183.487 242.278  0.00  0.00           C  
ATOM    135  C   LEU X   9     192.920 183.696 243.448  0.00  0.00           C  
ATOM    136  O   LEU X   9     193.266 183.365 244.574  0.00  0.00           O  
ATOM    137  CB  LEU X   9     194.593 184.799 241.775  0.00  0.00           C  
ATOM    138  CG  LEU X   9     195.031 185.856 242.871  0.00  0.00           C  
ATOM    139  CD1 LEU X   9     196.233 185.482 243.717  0.00  0.00           C  
ATOM    140  CD2 LEU X   9     195.126 187.265 242.124  0.00  0.00           C  
ATOM    141  H   LEU X   9     193.388 183.253 240.274  0.00  0.00           H  
ATOM    142  HA  LEU X   9     194.776 182.817 242.590  0.00  0.00           H  
ATOM    143  HB2 LEU X   9     195.387 184.566 241.065  0.00  0.00           H  
ATOM    144  HB3 LEU X   9     193.729 185.302 241.342  0.00  0.00           H  
ATOM    145  HG  LEU X   9     194.212 186.038 243.567  0.00  0.00           H  
ATOM    146 HD11 LEU X   9     196.186 186.006 244.671  0.00  0.00           H  
ATOM    147 HD12 LEU X   9     197.029 185.671 242.996  0.00  0.00           H  
ATOM    148 HD13 LEU X   9     196.175 184.411 243.909  0.00  0.00           H  
ATOM    149 HD21 LEU X   9     195.836 187.174 241.302  0.00  0.00           H  
ATOM    150 HD22 LEU X   9     194.121 187.601 241.869  0.00  0.00           H  
ATOM    151 HD23 LEU X   9     195.408 187.996 242.881  0.00  0.00           H  
ATOM    152  N   CYS X  10     191.682 184.087 243.189  0.00  0.00           N  
ATOM    153  CA  CYS X  10     190.609 184.220 244.194  0.00  0.00           C  
ATOM    154  C   CYS X  10     190.370 182.846 244.882  0.00  0.00           C  
ATOM    155  O   CYS X  10     190.466 182.893 246.080  0.00  0.00           O  
ATOM    156  CB  CYS X  10     189.309 184.804 243.668  0.00  0.00           C  
ATOM    157  SG  CYS X  10     189.647 186.466 243.060  0.00  0.00           S  
ATOM    158  H   CYS X  10     191.473 184.133 242.202  0.00  0.00           H  
ATOM    159  HA  CYS X  10     190.958 184.910 244.962  0.00  0.00           H  
ATOM    160  HB2 CYS X  10     188.861 184.089 242.978  0.00  0.00           H  
ATOM    161  HB3 CYS X  10     188.531 184.974 244.412  0.00  0.00           H  
ATOM    162  HG  CYS X  10     190.743 186.024 242.435  0.00  0.00           H  
ATOM    163  N   LEU X  11     190.079 181.814 244.181  0.00  0.00           N  
ATOM    164  CA  LEU X  11     189.878 180.381 244.655  0.00  0.00           C  
ATOM    165  C   LEU X  11     191.082 179.820 245.488  0.00  0.00           C  
ATOM    166  O   LEU X  11     190.799 179.310 246.592  0.00  0.00           O  
ATOM    167  CB  LEU X  11     189.431 179.362 243.480  0.00  0.00           C  
ATOM    168  CG  LEU X  11     188.091 179.756 242.724  0.00  0.00           C  
ATOM    169  CD1 LEU X  11     187.910 178.845 241.468  0.00  0.00           C  
ATOM    170  CD2 LEU X  11     186.973 179.582 243.669  0.00  0.00           C  
ATOM    171  H   LEU X  11     190.003 181.956 243.184  0.00  0.00           H  
ATOM    172  HA  LEU X  11     189.019 180.407 245.326  0.00  0.00           H  
ATOM    173  HB2 LEU X  11     190.243 179.349 242.753  0.00  0.00           H  
ATOM    174  HB3 LEU X  11     189.252 178.372 243.899  0.00  0.00           H  
ATOM    175  HG  LEU X  11     188.196 180.788 242.391  0.00  0.00           H  
ATOM    176 HD11 LEU X  11     187.001 179.050 240.903  0.00  0.00           H  
ATOM    177 HD12 LEU X  11     187.693 177.844 241.840  0.00  0.00           H  
ATOM    178 HD13 LEU X  11     188.867 178.971 240.961  0.00  0.00           H  
ATOM    179 HD21 LEU X  11     187.064 180.344 244.443  0.00  0.00           H  
ATOM    180 HD22 LEU X  11     186.004 179.704 243.185  0.00  0.00           H  
ATOM    181 HD23 LEU X  11     187.024 178.574 244.081  0.00  0.00           H  
ATOM    182  N   SER X  12     192.272 180.180 245.090  0.00  0.00           N  
ATOM    183  CA  SER X  12     193.511 179.955 245.892  0.00  0.00           C  
ATOM    184  C   SER X  12     193.531 180.676 247.240  0.00  0.00           C  
ATOM    185  O   SER X  12     193.852 180.093 248.297  0.00  0.00           O  
ATOM    186  CB  SER X  12     194.727 180.470 245.200  0.00  0.00           C  
ATOM    187  OG  SER X  12     194.845 180.014 243.852  0.00  0.00           O  
ATOM    188  H   SER X  12     192.314 180.830 244.317  0.00  0.00           H  
ATOM    189  HA  SER X  12     193.618 178.889 246.091  0.00  0.00           H  
ATOM    190  HB2 SER X  12     194.865 181.551 245.244  0.00  0.00           H  
ATOM    191  HB3 SER X  12     195.558 180.016 245.740  0.00  0.00           H  
ATOM    192  HG  SER X  12     194.188 180.426 243.287  0.00  0.00           H  
ATOM    193  N   CYS X  13     193.112 181.958 247.255  0.00  0.00           N  
ATOM    194  CA  CYS X  13     193.037 182.763 248.446  0.00  0.00           C  
ATOM    195  C   CYS X  13     191.948 182.265 249.411  0.00  0.00           C  
ATOM    196  O   CYS X  13     192.143 182.205 250.628  0.00  0.00           O  
ATOM    197  CB  CYS X  13     192.773 184.308 248.073  0.00  0.00           C  
ATOM    198  SG  CYS X  13     194.213 184.880 247.139  0.00  0.00           S  
ATOM    199  H   CYS X  13     192.884 182.433 246.393  0.00  0.00           H  
ATOM    200  HA  CYS X  13     193.943 182.732 249.050  0.00  0.00           H  
ATOM    201  HB2 CYS X  13     191.864 184.465 247.493  0.00  0.00           H  
ATOM    202  HB3 CYS X  13     192.756 184.886 248.997  0.00  0.00           H  
ATOM    203  HG  CYS X  13     193.975 184.256 245.982  0.00  0.00           H  
ATOM    204  N   LEU X  14     190.758 181.825 248.918  0.00  0.00           N  
ATOM    205  CA  LEU X  14     189.739 181.205 249.773  0.00  0.00           C  
ATOM    206  C   LEU X  14     190.201 179.925 250.497  0.00  0.00           C  
ATOM    207  O   LEU X  14     189.778 179.761 251.668  0.00  0.00           O  
ATOM    208  CB  LEU X  14     188.473 180.996 248.915  0.00  0.00           C  
ATOM    209  CG  LEU X  14     187.626 182.140 248.560  0.00  0.00           C  
ATOM    210  CD1 LEU X  14     186.467 181.703 247.690  0.00  0.00           C  
ATOM    211  CD2 LEU X  14     186.896 182.744 249.794  0.00  0.00           C  
ATOM    212  H   LEU X  14     190.528 181.738 247.938  0.00  0.00           H  
ATOM    213  HA  LEU X  14     189.480 181.936 250.538  0.00  0.00           H  
ATOM    214  HB2 LEU X  14     188.766 180.532 247.973  0.00  0.00           H  
ATOM    215  HB3 LEU X  14     187.867 180.328 249.527  0.00  0.00           H  
ATOM    216  HG  LEU X  14     188.215 182.897 248.042  0.00  0.00           H  
ATOM    217 HD11 LEU X  14     185.678 182.424 247.473  0.00  0.00           H  
ATOM    218 HD12 LEU X  14     185.998 180.843 248.168  0.00  0.00           H  
ATOM    219 HD13 LEU X  14     186.708 181.380 246.677  0.00  0.00           H  
ATOM    220 HD21 LEU X  14     186.442 183.652 249.397  0.00  0.00           H  
ATOM    221 HD22 LEU X  14     186.126 182.037 250.102  0.00  0.00           H  
ATOM    222 HD23 LEU X  14     187.561 182.955 250.631  0.00  0.00           H  
ATOM    223  N   LEU X  15     190.986 179.128 249.738  0.00  0.00           N  
ATOM    224  CA  LEU X  15     191.623 177.890 250.210  0.00  0.00           C  
ATOM    225  C   LEU X  15     192.681 178.183 251.325  0.00  0.00           C  
ATOM    226  O   LEU X  15     192.601 177.681 252.414  0.00  0.00           O  
ATOM    227  CB  LEU X  15     192.147 177.048 249.050  0.00  0.00           C  
ATOM    228  CG  LEU X  15     192.627 175.691 249.502  0.00  0.00           C  
ATOM    229  CD1 LEU X  15     191.642 174.863 250.376  0.00  0.00           C  
ATOM    230  CD2 LEU X  15     193.061 174.791 248.372  0.00  0.00           C  
ATOM    231  H   LEU X  15     191.102 179.485 248.800  0.00  0.00           H  
ATOM    232  HA  LEU X  15     190.813 177.406 250.757  0.00  0.00           H  
ATOM    233  HB2 LEU X  15     191.236 176.950 248.459  0.00  0.00           H  
ATOM    234  HB3 LEU X  15     192.847 177.568 248.397  0.00  0.00           H  
ATOM    235  HG  LEU X  15     193.470 176.005 250.117  0.00  0.00           H  
ATOM    236 HD11 LEU X  15     190.814 174.580 249.726  0.00  0.00           H  
ATOM    237 HD12 LEU X  15     191.168 175.503 251.121  0.00  0.00           H  
ATOM    238 HD13 LEU X  15     192.176 174.069 250.896  0.00  0.00           H  
ATOM    239 HD21 LEU X  15     193.400 173.877 248.859  0.00  0.00           H  
ATOM    240 HD22 LEU X  15     192.248 174.537 247.692  0.00  0.00           H  
ATOM    241 HD23 LEU X  15     193.807 175.229 247.708  0.00  0.00           H  
ATOM    242  N   LEU X  16     193.571 179.116 251.027  0.00  0.00           N  
ATOM    243  CA  LEU X  16     194.713 179.489 251.873  0.00  0.00           C  
ATOM    244  C   LEU X  16     194.160 180.183 253.160  0.00  0.00           C  
ATOM    245  O   LEU X  16     194.716 180.024 254.200  0.00  0.00           O  
ATOM    246  CB  LEU X  16     195.765 180.334 251.066  0.00  0.00           C  
ATOM    247  CG  LEU X  16     197.013 180.826 251.892  0.00  0.00           C  
ATOM    248  CD1 LEU X  16     197.871 179.664 252.429  0.00  0.00           C  
ATOM    249  CD2 LEU X  16     197.836 181.773 251.012  0.00  0.00           C  
ATOM    250  H   LEU X  16     193.328 179.515 250.132  0.00  0.00           H  
ATOM    251  HA  LEU X  16     195.134 178.611 252.364  0.00  0.00           H  
ATOM    252  HB2 LEU X  16     196.155 179.765 250.222  0.00  0.00           H  
ATOM    253  HB3 LEU X  16     195.265 181.198 250.630  0.00  0.00           H  
ATOM    254  HG  LEU X  16     196.686 181.499 252.684  0.00  0.00           H  
ATOM    255 HD11 LEU X  16     198.742 180.025 252.977  0.00  0.00           H  
ATOM    256 HD12 LEU X  16     198.229 178.998 251.644  0.00  0.00           H  
ATOM    257 HD13 LEU X  16     197.434 179.106 253.257  0.00  0.00           H  
ATOM    258 HD21 LEU X  16     198.768 182.168 251.417  0.00  0.00           H  
ATOM    259 HD22 LEU X  16     197.907 181.376 249.999  0.00  0.00           H  
ATOM    260 HD23 LEU X  16     197.231 182.679 250.999  0.00  0.00           H  
ATOM    261  N   LEU X  17     193.050 180.881 252.990  0.00  0.00           N  
ATOM    262  CA  LEU X  17     192.179 181.348 254.099  0.00  0.00           C  
ATOM    263  C   LEU X  17     191.648 180.184 255.023  0.00  0.00           C  
ATOM    264  O   LEU X  17     191.801 180.246 256.248  0.00  0.00           O  
ATOM    265  CB  LEU X  17     191.049 182.303 253.608  0.00  0.00           C  
ATOM    266  CG  LEU X  17     190.053 182.818 254.555  0.00  0.00           C  
ATOM    267  CD1 LEU X  17     189.509 184.181 254.189  0.00  0.00           C  
ATOM    268  CD2 LEU X  17     188.815 181.937 254.718  0.00  0.00           C  
ATOM    269  H   LEU X  17     192.805 181.177 252.056  0.00  0.00           H  
ATOM    270  HA  LEU X  17     192.749 181.913 254.837  0.00  0.00           H  
ATOM    271  HB2 LEU X  17     191.614 183.102 253.127  0.00  0.00           H  
ATOM    272  HB3 LEU X  17     190.520 181.839 252.775  0.00  0.00           H  
ATOM    273  HG  LEU X  17     190.535 182.900 255.528  0.00  0.00           H  
ATOM    274 HD11 LEU X  17     189.259 184.099 253.132  0.00  0.00           H  
ATOM    275 HD12 LEU X  17     190.392 184.808 254.310  0.00  0.00           H  
ATOM    276 HD13 LEU X  17     188.720 184.511 254.865  0.00  0.00           H  
ATOM    277 HD21 LEU X  17     188.106 182.377 255.419  0.00  0.00           H  
ATOM    278 HD22 LEU X  17     188.432 181.555 253.771  0.00  0.00           H  
ATOM    279 HD23 LEU X  17     189.169 180.978 255.095  0.00  0.00           H  
ATOM    280  N   SER X  18     190.931 179.168 254.384  0.00  0.00           N  
ATOM    281  CA  SER X  18     190.368 177.993 255.089  0.00  0.00           C  
ATOM    282  C   SER X  18     191.474 177.109 255.712  0.00  0.00           C  
ATOM    283  O   SER X  18     191.438 176.673 256.876  0.00  0.00           O  
ATOM    284  CB  SER X  18     189.600 177.086 254.138  0.00  0.00           C  
ATOM    285  OG  SER X  18     189.315 175.786 254.601  0.00  0.00           O  
ATOM    286  H   SER X  18     190.825 179.272 253.385  0.00  0.00           H  
ATOM    287  HA  SER X  18     189.643 178.272 255.853  0.00  0.00           H  
ATOM    288  HB2 SER X  18     188.664 177.576 253.870  0.00  0.00           H  
ATOM    289  HB3 SER X  18     190.148 177.020 253.198  0.00  0.00           H  
ATOM    290  HG  SER X  18     188.524 175.460 254.165  0.00  0.00           H  
ATOM    291  N   ILE X  19     192.667 177.080 255.108  0.00  0.00           N  
ATOM    292  CA  ILE X  19     193.896 176.418 255.696  0.00  0.00           C  
ATOM    293  C   ILE X  19     194.440 177.210 256.829  0.00  0.00           C  
ATOM    294  O   ILE X  19     194.942 176.704 257.811  0.00  0.00           O  
ATOM    295  CB  ILE X  19     194.915 176.302 254.529  0.00  0.00           C  
ATOM    296  CG1 ILE X  19     194.386 175.339 253.531  0.00  0.00           C  
ATOM    297  CG2 ILE X  19     196.274 175.780 255.051  0.00  0.00           C  
ATOM    298  CD1 ILE X  19     195.214 175.321 252.231  0.00  0.00           C  
ATOM    299  H   ILE X  19     192.703 177.427 254.161  0.00  0.00           H  
ATOM    300  HA  ILE X  19     193.647 175.468 256.169  0.00  0.00           H  
ATOM    301  HB  ILE X  19     195.108 177.273 254.072  0.00  0.00           H  
ATOM    302 HG12 ILE X  19     194.368 174.352 253.992  0.00  0.00           H  
ATOM    303 HG13 ILE X  19     193.355 175.586 253.278  0.00  0.00           H  
ATOM    304 HG21 ILE X  19     197.010 175.551 254.280  0.00  0.00           H  
ATOM    305 HG22 ILE X  19     195.992 174.926 255.667  0.00  0.00           H  
ATOM    306 HG23 ILE X  19     196.587 176.569 255.736  0.00  0.00           H  
ATOM    307 HD11 ILE X  19     196.252 175.058 252.435  0.00  0.00           H  
ATOM    308 HD12 ILE X  19     195.263 176.271 251.700  0.00  0.00           H  
ATOM    309 HD13 ILE X  19     194.755 174.608 251.547  0.00  0.00           H  
ATOM    310  N   TRP X  20     194.395 178.543 256.807  0.00  0.00           N  
ATOM    311  CA  TRP X  20     194.711 179.449 257.875  0.00  0.00           C  
ATOM    312  C   TRP X  20     193.869 179.139 259.084  0.00  0.00           C  
ATOM    313  O   TRP X  20     194.454 178.969 260.130  0.00  0.00           O  
ATOM    314  CB  TRP X  20     194.707 180.896 257.508  0.00  0.00           C  
ATOM    315  CG  TRP X  20     194.559 181.805 258.729  0.00  0.00           C  
ATOM    316  CD1 TRP X  20     193.404 182.450 259.006  0.00  0.00           C  
ATOM    317  CD2 TRP X  20     195.433 181.950 259.913  0.00  0.00           C  
ATOM    318  CE2 TRP X  20     194.692 182.690 260.930  0.00  0.00           C  
ATOM    319  CE3 TRP X  20     196.632 181.412 260.319  0.00  0.00           C  
ATOM    320  NE1 TRP X  20     193.539 183.095 260.222  0.00  0.00           N  
ATOM    321  CZ2 TRP X  20     195.234 183.049 262.162  0.00  0.00           C  
ATOM    322  CZ3 TRP X  20     197.174 181.721 261.590  0.00  0.00           C  
ATOM    323  CH2 TRP X  20     196.473 182.586 262.479  0.00  0.00           C  
ATOM    324  H   TRP X  20     194.008 179.029 256.011  0.00  0.00           H  
ATOM    325  HA  TRP X  20     195.748 179.248 258.144  0.00  0.00           H  
ATOM    326  HB2 TRP X  20     195.643 181.216 257.050  0.00  0.00           H  
ATOM    327  HB3 TRP X  20     193.977 181.147 256.738  0.00  0.00           H  
ATOM    328  HD1 TRP X  20     192.519 182.450 258.387  0.00  0.00           H  
ATOM    329  HE1 TRP X  20     192.694 183.448 260.647  0.00  0.00           H  
ATOM    330  HE3 TRP X  20     197.200 180.801 259.633  0.00  0.00           H  
ATOM    331  HZ2 TRP X  20     194.615 183.667 262.796  0.00  0.00           H  
ATOM    332  HZ3 TRP X  20     198.144 181.284 261.776  0.00  0.00           H  
ATOM    333  HH2 TRP X  20     196.855 182.623 263.488  0.00  0.00           H  
ATOM    334  N   ARG X  21     192.553 179.178 258.898  0.00  0.00           N  
ATOM    335  CA  ARG X  21     191.660 179.016 260.028  0.00  0.00           C  
ATOM    336  C   ARG X  21     191.864 177.644 260.701  0.00  0.00           C  
ATOM    337  O   ARG X  21     191.755 177.650 261.889  0.00  0.00           O  
ATOM    338  CB  ARG X  21     190.169 179.164 259.475  0.00  0.00           C  
ATOM    339  CG  ARG X  21     189.885 180.503 258.842  0.00  0.00           C  
ATOM    340  CD  ARG X  21     189.707 181.620 259.901  0.00  0.00           C  
ATOM    341  NE  ARG X  21     188.401 181.528 260.533  0.00  0.00           N  
ATOM    342  CZ  ARG X  21     187.937 182.294 261.500  0.00  0.00           C  
ATOM    343  NH1 ARG X  21     186.781 182.132 262.097  0.00  0.00           N1+
ATOM    344  NH2 ARG X  21     188.478 183.413 261.902  0.00  0.00           N  
ATOM    345  H   ARG X  21     192.186 179.439 257.994  0.00  0.00           H  
ATOM    346  HA  ARG X  21     191.880 179.762 260.792  0.00  0.00           H  
ATOM    347  HB2 ARG X  21     189.946 178.406 258.725  0.00  0.00           H  
ATOM    348  HB3 ARG X  21     189.484 179.010 260.309  0.00  0.00           H  
ATOM    349  HG2 ARG X  21     190.732 180.765 258.209  0.00  0.00           H  
ATOM    350  HG3 ARG X  21     189.037 180.457 258.159  0.00  0.00           H  
ATOM    351  HD2 ARG X  21     190.485 181.534 260.660  0.00  0.00           H  
ATOM    352  HD3 ARG X  21     189.846 182.626 259.505  0.00  0.00           H  
ATOM    353  HE  ARG X  21     187.792 180.841 260.111  0.00  0.00           H  
ATOM    354 HH11 ARG X  21     186.238 181.298 261.925  0.00  0.00           H  
ATOM    355 HH12 ARG X  21     186.394 182.802 262.747  0.00  0.00           H  
ATOM    356 HH21 ARG X  21     189.399 183.681 261.585  0.00  0.00           H  
ATOM    357 HH22 ARG X  21     187.897 183.981 262.502  0.00  0.00           H  
ATOM    358  N   GLN X  22     192.261 176.546 259.996  0.00  0.00           N  
ATOM    359  CA  GLN X  22     192.753 175.253 260.644  0.00  0.00           C  
ATOM    360  C   GLN X  22     194.246 175.405 261.134  0.00  0.00           C  
ATOM    361  O   GLN X  22     194.584 174.862 262.204  0.00  0.00           O  
ATOM    362  CB  GLN X  22     192.621 174.031 259.661  0.00  0.00           C  
ATOM    363  CG  GLN X  22     191.239 173.748 259.134  0.00  0.00           C  
ATOM    364  CD  GLN X  22     190.289 173.469 260.209  0.00  0.00           C  
ATOM    365  NE2 GLN X  22     188.990 173.505 259.911  0.00  0.00           N  
ATOM    366  OE1 GLN X  22     190.584 173.327 261.377  0.00  0.00           O  
ATOM    367  H   GLN X  22     192.194 176.623 258.991  0.00  0.00           H  
ATOM    368  HA  GLN X  22     192.196 175.119 261.572  0.00  0.00           H  
ATOM    369  HB2 GLN X  22     193.325 174.167 258.840  0.00  0.00           H  
ATOM    370  HB3 GLN X  22     192.917 173.116 260.174  0.00  0.00           H  
ATOM    371  HG2 GLN X  22     190.893 174.538 258.468  0.00  0.00           H  
ATOM    372  HG3 GLN X  22     191.242 173.000 258.341  0.00  0.00           H  
ATOM    373 HE21 GLN X  22     188.393 173.243 260.682  0.00  0.00           H  
ATOM    374 HE22 GLN X  22     188.732 173.752 258.967  0.00  0.00           H  
ATOM    375  N   SER X  23     195.112 176.186 260.522  0.00  0.00           N  
ATOM    376  CA  SER X  23     196.516 176.379 260.912  0.00  0.00           C  
ATOM    377  C   SER X  23     196.561 177.128 262.243  0.00  0.00           C  
ATOM    378  O   SER X  23     197.515 177.043 262.966  0.00  0.00           O  
ATOM    379  CB  SER X  23     197.354 177.122 259.821  0.00  0.00           C  
ATOM    380  OG  SER X  23     197.429 176.216 258.689  0.00  0.00           O  
ATOM    381  H   SER X  23     194.843 176.725 259.712  0.00  0.00           H  
ATOM    382  HA  SER X  23     196.997 175.416 261.086  0.00  0.00           H  
ATOM    383  HB2 SER X  23     196.865 178.044 259.508  0.00  0.00           H  
ATOM    384  HB3 SER X  23     198.329 177.410 260.214  0.00  0.00           H  
ATOM    385  HG  SER X  23     196.571 176.118 258.269  0.00  0.00           H  
ATOM    386  N   SER X  24     195.533 177.938 262.555  0.00  0.00           N  
ATOM    387  CA  SER X  24     195.592 178.926 263.661  0.00  0.00           C  
ATOM    388  C   SER X  24     195.600 178.392 265.096  0.00  0.00           C  
ATOM    389  O   SER X  24     195.604 179.130 266.084  0.00  0.00           O  
ATOM    390  CB  SER X  24     194.316 179.758 263.465  0.00  0.00           C  
ATOM    391  OG  SER X  24     193.205 178.992 263.785  0.00  0.00           O  
ATOM    392  H   SER X  24     194.808 177.945 261.852  0.00  0.00           H  
ATOM    393  HA  SER X  24     196.418 179.624 263.529  0.00  0.00           H  
ATOM    394  HB2 SER X  24     194.279 180.695 264.021  0.00  0.00           H  
ATOM    395  HB3 SER X  24     194.188 180.092 262.435  0.00  0.00           H  
ATOM    396  HG  SER X  24     192.800 178.625 262.996  0.00  0.00           H  
ATOM    397  N   GLY X  25     195.467 177.079 265.293  0.00  0.00           N  
ATOM    398  CA  GLY X  25     195.223 176.393 266.621  0.00  0.00           C  
ATOM    399  C   GLY X  25     193.913 175.596 266.636  0.00  0.00           C  
ATOM    400  O   GLY X  25     193.738 174.704 267.507  0.00  0.00           O  
ATOM    401  H   GLY X  25     195.709 176.471 264.524  0.00  0.00           H  
ATOM    402  HA2 GLY X  25     196.015 175.655 266.750  0.00  0.00           H  
ATOM    403  HA3 GLY X  25     195.255 177.066 267.478  0.00  0.00           H  
ATOM    404  N   ARG X  26     193.019 175.845 265.651  0.00  0.00           N  
ATOM    405  CA  ARG X  26     191.810 175.111 265.519  0.00  0.00           C  
ATOM    406  C   ARG X  26     192.038 173.552 265.263  0.00  0.00           C  
ATOM    407  O   ARG X  26     191.554 172.731 266.056  0.00  0.00           O  
ATOM    408  CB  ARG X  26     191.026 175.827 264.415  0.00  0.00           C  
ATOM    409  CG  ARG X  26     189.622 175.283 264.193  0.00  0.00           C  
ATOM    410  CD  ARG X  26     189.108 175.983 262.934  0.00  0.00           C  
ATOM    411  NE  ARG X  26     187.710 175.658 262.653  0.00  0.00           N  
ATOM    412  CZ  ARG X  26     186.637 176.427 262.424  0.00  0.00           C  
ATOM    413  NH1 ARG X  26     186.644 177.642 262.741  0.00  0.00           N1+
ATOM    414  NH2 ARG X  26     185.475 176.014 261.861  0.00  0.00           N  
ATOM    415  H   ARG X  26     193.319 176.465 264.912  0.00  0.00           H  
ATOM    416  HA  ARG X  26     191.268 175.147 266.464  0.00  0.00           H  
ATOM    417  HB2 ARG X  26     190.962 176.895 264.621  0.00  0.00           H  
ATOM    418  HB3 ARG X  26     191.663 175.708 263.539  0.00  0.00           H  
ATOM    419  HG2 ARG X  26     189.587 174.211 264.001  0.00  0.00           H  
ATOM    420  HG3 ARG X  26     188.975 175.485 265.046  0.00  0.00           H  
ATOM    421  HD2 ARG X  26     189.211 177.052 263.118  0.00  0.00           H  
ATOM    422  HD3 ARG X  26     189.652 175.840 262.001  0.00  0.00           H  
ATOM    423  HE  ARG X  26     187.509 174.690 262.443  0.00  0.00           H  
ATOM    424 HH11 ARG X  26     187.474 178.068 263.128  0.00  0.00           H  
ATOM    425 HH12 ARG X  26     185.845 178.229 262.551  0.00  0.00           H  
ATOM    426 HH21 ARG X  26     185.321 175.025 261.723  0.00  0.00           H  
ATOM    427 HH22 ARG X  26     184.701 176.646 261.717  0.00  0.00           H  
ATOM    428  N   GLY X  27     192.662 173.262 264.159  0.00  0.00           N  
ATOM    429  CA  GLY X  27     192.815 171.956 263.554  0.00  0.00           C  
ATOM    430  C   GLY X  27     193.643 170.897 264.354  0.00  0.00           C  
ATOM    431  O   GLY X  27     194.453 171.347 265.207  0.00  0.00           O  
ATOM    432  H   GLY X  27     193.139 174.017 263.688  0.00  0.00           H  
ATOM    433  HA2 GLY X  27     191.893 171.605 263.090  0.00  0.00           H  
ATOM    434  HA3 GLY X  27     193.430 172.158 262.678  0.00  0.00           H  
ATOM    435  N   LYS X  28     193.426 169.613 264.131  0.00  0.00           N  
ATOM    436  CA  LYS X  28     193.780 168.422 264.868  0.00  0.00           C  
ATOM    437  C   LYS X  28     193.857 167.130 264.047  0.00  0.00           C  
ATOM    438  O   LYS X  28     193.081 166.889 263.157  0.00  0.00           O  
ATOM    439  CB  LYS X  28     192.897 168.286 266.116  0.00  0.00           C  
ATOM    440  CG  LYS X  28     191.423 168.124 265.868  0.00  0.00           C  
ATOM    441  CD  LYS X  28     190.660 167.398 266.967  0.00  0.00           C  
ATOM    442  CE  LYS X  28     191.110 165.950 267.115  0.00  0.00           C  
ATOM    443  NZ  LYS X  28     190.176 165.260 268.013  0.00  0.00           N1+
ATOM    444  H   LYS X  28     192.752 169.496 263.389  0.00  0.00           H  
ATOM    445  HA  LYS X  28     194.770 168.630 265.273  0.00  0.00           H  
ATOM    446  HB2 LYS X  28     193.281 167.349 266.521  0.00  0.00           H  
ATOM    447  HB3 LYS X  28     193.076 169.172 266.725  0.00  0.00           H  
ATOM    448  HG2 LYS X  28     191.077 169.158 265.859  0.00  0.00           H  
ATOM    449  HG3 LYS X  28     191.276 167.592 264.929  0.00  0.00           H  
ATOM    450  HD2 LYS X  28     190.874 167.756 267.975  0.00  0.00           H  
ATOM    451  HD3 LYS X  28     189.582 167.444 266.808  0.00  0.00           H  
ATOM    452  HE2 LYS X  28     191.176 165.292 266.249  0.00  0.00           H  
ATOM    453  HE3 LYS X  28     192.115 165.894 267.534  0.00  0.00           H  
ATOM    454  HZ1 LYS X  28     189.201 165.232 267.751  0.00  0.00           H  
ATOM    455  HZ2 LYS X  28     190.172 165.701 268.922  0.00  0.00           H  
ATOM    456  HZ3 LYS X  28     190.500 164.307 268.099  0.00  0.00           H  
ATOM    457  N   LEU X  29     194.817 166.262 264.383  0.00  0.00           N  
ATOM    458  CA  LEU X  29     195.063 165.018 263.724  0.00  0.00           C  
ATOM    459  C   LEU X  29     194.360 163.754 264.457  0.00  0.00           C  
ATOM    460  O   LEU X  29     193.302 163.365 263.914  0.00  0.00           O  
ATOM    461  CB  LEU X  29     196.605 164.749 263.445  0.00  0.00           C  
ATOM    462  CG  LEU X  29     197.201 165.551 262.192  0.00  0.00           C  
ATOM    463  CD1 LEU X  29     198.706 165.761 262.366  0.00  0.00           C  
ATOM    464  CD2 LEU X  29     196.953 164.731 260.917  0.00  0.00           C  
ATOM    465  H   LEU X  29     195.376 166.434 265.206  0.00  0.00           H  
ATOM    466  HA  LEU X  29     194.615 165.107 262.735  0.00  0.00           H  
ATOM    467  HB2 LEU X  29     197.110 165.160 264.319  0.00  0.00           H  
ATOM    468  HB3 LEU X  29     196.876 163.694 263.499  0.00  0.00           H  
ATOM    469  HG  LEU X  29     196.635 166.483 262.188  0.00  0.00           H  
ATOM    470 HD11 LEU X  29     199.210 166.275 261.548  0.00  0.00           H  
ATOM    471 HD12 LEU X  29     199.184 164.803 262.569  0.00  0.00           H  
ATOM    472 HD13 LEU X  29     198.821 166.413 263.232  0.00  0.00           H  
ATOM    473 HD21 LEU X  29     197.260 165.485 260.192  0.00  0.00           H  
ATOM    474 HD22 LEU X  29     197.586 163.849 260.813  0.00  0.00           H  
ATOM    475 HD23 LEU X  29     195.903 164.510 260.723  0.00  0.00           H  
ATOM    476  N   PRO X  30     194.785 163.205 265.599  0.00  0.00           N  
ATOM    477  CA  PRO X  30     196.078 163.392 266.304  0.00  0.00           C  
ATOM    478  C   PRO X  30     196.332 164.759 266.963  0.00  0.00           C  
ATOM    479  O   PRO X  30     195.365 165.368 267.441  0.00  0.00           O  
ATOM    480  CB  PRO X  30     196.078 162.368 267.441  0.00  0.00           C  
ATOM    481  CG  PRO X  30     195.145 161.266 266.972  0.00  0.00           C  
ATOM    482  CD  PRO X  30     194.067 162.081 266.156  0.00  0.00           C  
ATOM    483  HA  PRO X  30     196.868 163.155 265.591  0.00  0.00           H  
ATOM    484  HB2 PRO X  30     197.075 162.022 267.712  0.00  0.00           H  
ATOM    485  HB3 PRO X  30     195.707 162.789 268.375  0.00  0.00           H  
ATOM    486  HG2 PRO X  30     195.581 160.558 266.267  0.00  0.00           H  
ATOM    487  HG3 PRO X  30     194.722 160.670 267.781  0.00  0.00           H  
ATOM    488  HD2 PRO X  30     193.641 161.521 265.323  0.00  0.00           H  
ATOM    489  HD3 PRO X  30     193.307 162.488 266.822  0.00  0.00           H  
ATOM    490  N   PRO X  31     197.551 165.228 266.853  0.00  0.00           N  
ATOM    491  CA  PRO X  31     197.970 166.555 267.270  0.00  0.00           C  
ATOM    492  C   PRO X  31     197.461 167.844 266.543  0.00  0.00           C  
ATOM    493  O   PRO X  31     196.875 167.709 265.466  0.00  0.00           O  
ATOM    494  CB  PRO X  31     199.508 166.447 267.339  0.00  0.00           C  
ATOM    495  CG  PRO X  31     199.689 165.016 267.789  0.00  0.00           C  
ATOM    496  CD  PRO X  31     198.744 164.388 266.842  0.00  0.00           C  
ATOM    497  HA  PRO X  31     197.523 166.703 268.253  0.00  0.00           H  
ATOM    498  HB2 PRO X  31     199.982 166.618 266.373  0.00  0.00           H  
ATOM    499  HB3 PRO X  31     200.015 167.126 268.025  0.00  0.00           H  
ATOM    500  HG2 PRO X  31     200.703 164.648 267.631  0.00  0.00           H  
ATOM    501  HG3 PRO X  31     199.317 164.930 268.810  0.00  0.00           H  
ATOM    502  HD2 PRO X  31     199.316 164.405 265.915  0.00  0.00           H  
ATOM    503  HD3 PRO X  31     198.504 163.377 267.172  0.00  0.00           H  
ATOM    504  N   GLY X  32     197.605 168.909 267.287  0.00  0.00           N  
ATOM    505  CA  GLY X  32     197.385 170.296 266.865  0.00  0.00           C  
ATOM    506  C   GLY X  32     198.562 171.258 266.900  0.00  0.00           C  
ATOM    507  O   GLY X  32     199.575 170.855 267.451  0.00  0.00           O  
ATOM    508  H   GLY X  32     197.879 168.727 268.242  0.00  0.00           H  
ATOM    509  HA2 GLY X  32     196.965 170.343 265.860  0.00  0.00           H  
ATOM    510  HA3 GLY X  32     196.516 170.702 267.383  0.00  0.00           H  
ATOM    511  N   PRO X  33     198.471 172.432 266.191  0.00  0.00           N  
ATOM    512  CA  PRO X  33     199.528 173.417 265.955  0.00  0.00           C  
ATOM    513  C   PRO X  33     199.568 174.475 267.043  0.00  0.00           C  
ATOM    514  O   PRO X  33     198.784 175.474 266.979  0.00  0.00           O  
ATOM    515  CB  PRO X  33     199.272 173.958 264.575  0.00  0.00           C  
ATOM    516  CG  PRO X  33     197.728 173.917 264.417  0.00  0.00           C  
ATOM    517  CD  PRO X  33     197.344 172.769 265.381  0.00  0.00           C  
ATOM    518  HA  PRO X  33     200.505 172.933 265.961  0.00  0.00           H  
ATOM    519  HB2 PRO X  33     199.814 174.890 264.414  0.00  0.00           H  
ATOM    520  HB3 PRO X  33     199.650 173.205 263.884  0.00  0.00           H  
ATOM    521  HG2 PRO X  33     197.237 174.851 264.689  0.00  0.00           H  
ATOM    522  HG3 PRO X  33     197.406 173.677 263.403  0.00  0.00           H  
ATOM    523  HD2 PRO X  33     196.453 173.087 265.922  0.00  0.00           H  
ATOM    524  HD3 PRO X  33     196.979 171.940 264.774  0.00  0.00           H  
ATOM    525  N   THR X  34     200.406 174.283 268.113  0.00  0.00           N  
ATOM    526  CA  THR X  34     200.307 175.067 269.356  0.00  0.00           C  
ATOM    527  C   THR X  34     201.623 175.370 270.106  0.00  0.00           C  
ATOM    528  O   THR X  34     201.656 176.267 271.008  0.00  0.00           O  
ATOM    529  CB  THR X  34     199.333 174.507 270.344  0.00  0.00           C  
ATOM    530  CG2 THR X  34     197.911 174.312 269.766  0.00  0.00           C  
ATOM    531  OG1 THR X  34     199.614 173.226 271.012  0.00  0.00           O  
ATOM    532  H   THR X  34     200.968 173.444 268.132  0.00  0.00           H  
ATOM    533  HA  THR X  34     199.976 176.062 269.058  0.00  0.00           H  
ATOM    534  HB  THR X  34     199.192 175.198 271.175  0.00  0.00           H  
ATOM    535  HG1 THR X  34     199.076 173.218 271.806  0.00  0.00           H  
ATOM    536 HG21 THR X  34     197.583 175.160 269.163  0.00  0.00           H  
ATOM    537 HG22 THR X  34     197.243 173.987 270.564  0.00  0.00           H  
ATOM    538 HG23 THR X  34     197.939 173.460 269.088  0.00  0.00           H  
ATOM    539  N   PRO X  35     202.727 174.562 270.046  0.00  0.00           N  
ATOM    540  CA  PRO X  35     202.891 173.251 269.460  0.00  0.00           C  
ATOM    541  C   PRO X  35     203.329 173.363 267.949  0.00  0.00           C  
ATOM    542  O   PRO X  35     203.180 172.377 267.177  0.00  0.00           O  
ATOM    543  CB  PRO X  35     204.083 172.580 270.152  0.00  0.00           C  
ATOM    544  CG  PRO X  35     204.415 173.488 271.277  0.00  0.00           C  
ATOM    545  CD  PRO X  35     203.921 174.865 270.936  0.00  0.00           C  
ATOM    546  HA  PRO X  35     202.009 172.631 269.622  0.00  0.00           H  
ATOM    547  HB2 PRO X  35     203.752 171.664 270.643  0.00  0.00           H  
ATOM    548  HB3 PRO X  35     204.979 172.430 269.550  0.00  0.00           H  
ATOM    549  HG2 PRO X  35     203.836 173.101 272.115  0.00  0.00           H  
ATOM    550  HG3 PRO X  35     205.494 173.563 271.415  0.00  0.00           H  
ATOM    551  HD2 PRO X  35     203.638 175.429 271.825  0.00  0.00           H  
ATOM    552  HD3 PRO X  35     204.674 175.347 270.313  0.00  0.00           H  
ATOM    553  N   LEU X  36     203.890 174.505 267.504  0.00  0.00           N  
ATOM    554  CA  LEU X  36     204.496 174.779 266.249  0.00  0.00           C  
ATOM    555  C   LEU X  36     205.881 175.556 266.383  0.00  0.00           C  
ATOM    556  O   LEU X  36     206.036 176.577 265.697  0.00  0.00           O  
ATOM    557  CB  LEU X  36     203.472 175.189 265.232  0.00  0.00           C  
ATOM    558  CG  LEU X  36     203.875 175.040 263.827  0.00  0.00           C  
ATOM    559  CD1 LEU X  36     203.639 173.675 263.204  0.00  0.00           C  
ATOM    560  CD2 LEU X  36     203.119 176.004 262.967  0.00  0.00           C  
ATOM    561  H   LEU X  36     203.912 175.230 268.206  0.00  0.00           H  
ATOM    562  HA  LEU X  36     204.974 173.868 265.890  0.00  0.00           H  
ATOM    563  HB2 LEU X  36     202.506 174.700 265.356  0.00  0.00           H  
ATOM    564  HB3 LEU X  36     203.129 176.210 265.400  0.00  0.00           H  
ATOM    565  HG  LEU X  36     204.943 175.210 263.689  0.00  0.00           H  
ATOM    566 HD11 LEU X  36     202.566 173.525 263.332  0.00  0.00           H  
ATOM    567 HD12 LEU X  36     204.136 172.858 263.727  0.00  0.00           H  
ATOM    568 HD13 LEU X  36     203.832 173.673 262.132  0.00  0.00           H  
ATOM    569 HD21 LEU X  36     203.399 177.048 263.103  0.00  0.00           H  
ATOM    570 HD22 LEU X  36     203.366 175.771 261.932  0.00  0.00           H  
ATOM    571 HD23 LEU X  36     202.029 175.983 262.965  0.00  0.00           H  
ATOM    572  N   PRO X  37     206.879 175.039 267.075  0.00  0.00           N  
ATOM    573  CA  PRO X  37     208.291 175.583 267.063  0.00  0.00           C  
ATOM    574  C   PRO X  37     208.929 175.679 265.630  0.00  0.00           C  
ATOM    575  O   PRO X  37     209.650 176.632 265.399  0.00  0.00           O  
ATOM    576  CB  PRO X  37     209.142 174.602 267.826  0.00  0.00           C  
ATOM    577  CG  PRO X  37     208.331 173.377 267.983  0.00  0.00           C  
ATOM    578  CD  PRO X  37     206.897 173.930 268.019  0.00  0.00           C  
ATOM    579  HA  PRO X  37     208.358 176.562 267.538  0.00  0.00           H  
ATOM    580  HB2 PRO X  37     210.097 174.432 267.328  0.00  0.00           H  
ATOM    581  HB3 PRO X  37     209.342 175.007 268.818  0.00  0.00           H  
ATOM    582  HG2 PRO X  37     208.512 172.862 267.039  0.00  0.00           H  
ATOM    583  HG3 PRO X  37     208.484 172.772 268.876  0.00  0.00           H  
ATOM    584  HD2 PRO X  37     206.190 173.145 267.752  0.00  0.00           H  
ATOM    585  HD3 PRO X  37     206.724 174.303 269.029  0.00  0.00           H  
ATOM    586  N   VAL X  38     208.557 174.827 264.665  0.00  0.00           N  
ATOM    587  CA  VAL X  38     209.274 174.747 263.430  0.00  0.00           C  
ATOM    588  C   VAL X  38     209.019 175.996 262.583  0.00  0.00           C  
ATOM    589  O   VAL X  38     209.919 176.256 261.792  0.00  0.00           O  
ATOM    590  CB  VAL X  38     209.025 173.404 262.675  0.00  0.00           C  
ATOM    591  CG1 VAL X  38     209.461 172.226 263.601  0.00  0.00           C  
ATOM    592  CG2 VAL X  38     207.622 173.253 262.064  0.00  0.00           C  
ATOM    593  H   VAL X  38     207.769 174.218 264.836  0.00  0.00           H  
ATOM    594  HA  VAL X  38     210.323 174.958 263.639  0.00  0.00           H  
ATOM    595  HB  VAL X  38     209.667 173.429 261.794  0.00  0.00           H  
ATOM    596 HG11 VAL X  38     208.775 172.099 264.438  0.00  0.00           H  
ATOM    597 HG12 VAL X  38     209.521 171.404 262.887  0.00  0.00           H  
ATOM    598 HG13 VAL X  38     210.321 172.518 264.205  0.00  0.00           H  
ATOM    599 HG21 VAL X  38     207.708 172.284 261.573  0.00  0.00           H  
ATOM    600 HG22 VAL X  38     207.385 174.101 261.421  0.00  0.00           H  
ATOM    601 HG23 VAL X  38     206.812 173.078 262.773  0.00  0.00           H  
ATOM    602  N   ILE X  39     207.910 176.681 262.777  0.00  0.00           N  
ATOM    603  CA  ILE X  39     207.664 177.969 262.284  0.00  0.00           C  
ATOM    604  C   ILE X  39     207.477 178.958 263.442  0.00  0.00           C  
ATOM    605  O   ILE X  39     206.598 179.811 263.459  0.00  0.00           O  
ATOM    606  CB  ILE X  39     206.465 177.995 261.223  0.00  0.00           C  
ATOM    607  CG1 ILE X  39     206.571 176.836 260.257  0.00  0.00           C  
ATOM    608  CG2 ILE X  39     206.342 179.311 260.434  0.00  0.00           C  
ATOM    609  CD1 ILE X  39     205.655 176.808 259.061  0.00  0.00           C  
ATOM    610  H   ILE X  39     207.212 176.211 263.335  0.00  0.00           H  
ATOM    611  HA  ILE X  39     208.583 178.284 261.791  0.00  0.00           H  
ATOM    612  HB  ILE X  39     205.535 177.858 261.775  0.00  0.00           H  
ATOM    613 HG12 ILE X  39     207.537 176.564 259.830  0.00  0.00           H  
ATOM    614 HG13 ILE X  39     206.303 175.935 260.808  0.00  0.00           H  
ATOM    615 HG21 ILE X  39     205.572 179.191 259.673  0.00  0.00           H  
ATOM    616 HG22 ILE X  39     207.339 179.544 260.059  0.00  0.00           H  
ATOM    617 HG23 ILE X  39     206.032 180.139 261.071  0.00  0.00           H  
ATOM    618 HD11 ILE X  39     204.688 177.072 259.489  0.00  0.00           H  
ATOM    619 HD12 ILE X  39     205.690 175.791 258.672  0.00  0.00           H  
ATOM    620 HD13 ILE X  39     205.909 177.620 258.380  0.00  0.00           H  
ATOM    621  N   GLY X  40     208.380 178.867 264.402  0.00  0.00           N  
ATOM    622  CA  GLY X  40     208.691 179.657 265.592  0.00  0.00           C  
ATOM    623  C   GLY X  40     207.573 179.807 266.688  0.00  0.00           C  
ATOM    624  O   GLY X  40     207.765 180.587 267.622  0.00  0.00           O  
ATOM    625  H   GLY X  40     208.895 177.999 264.372  0.00  0.00           H  
ATOM    626  HA2 GLY X  40     209.552 179.275 266.141  0.00  0.00           H  
ATOM    627  HA3 GLY X  40     208.926 180.663 265.246  0.00  0.00           H  
ATOM    628  N   ASN X  41     206.361 179.362 266.439  0.00  0.00           N  
ATOM    629  CA  ASN X  41     205.109 179.543 267.147  0.00  0.00           C  
ATOM    630  C   ASN X  41     204.504 180.915 267.167  0.00  0.00           C  
ATOM    631  O   ASN X  41     203.420 181.031 267.711  0.00  0.00           O  
ATOM    632  CB  ASN X  41     205.295 178.936 268.597  0.00  0.00           C  
ATOM    633  CG  ASN X  41     204.093 178.144 269.045  0.00  0.00           C  
ATOM    634  ND2 ASN X  41     203.701 178.147 270.278  0.00  0.00           N  
ATOM    635  OD1 ASN X  41     203.488 177.419 268.281  0.00  0.00           O  
ATOM    636  H   ASN X  41     206.287 178.764 265.629  0.00  0.00           H  
ATOM    637  HA  ASN X  41     204.393 178.942 266.587  0.00  0.00           H  
ATOM    638  HB2 ASN X  41     206.194 178.321 268.554  0.00  0.00           H  
ATOM    639  HB3 ASN X  41     205.453 179.821 269.214  0.00  0.00           H  
ATOM    640 HD21 ASN X  41     204.145 178.808 270.899  0.00  0.00           H  
ATOM    641 HD22 ASN X  41     202.952 177.557 270.610  0.00  0.00           H  
ATOM    642  N   ILE X  42     205.107 181.940 266.501  0.00  0.00           N  
ATOM    643  CA  ILE X  42     204.707 183.358 266.484  0.00  0.00           C  
ATOM    644  C   ILE X  42     203.238 183.449 265.936  0.00  0.00           C  
ATOM    645  O   ILE X  42     202.478 184.245 266.412  0.00  0.00           O  
ATOM    646  CB  ILE X  42     205.661 184.162 265.555  0.00  0.00           C  
ATOM    647  CG1 ILE X  42     207.145 184.010 265.974  0.00  0.00           C  
ATOM    648  CG2 ILE X  42     205.256 185.612 265.586  0.00  0.00           C  
ATOM    649  CD1 ILE X  42     207.363 184.512 267.435  0.00  0.00           C  
ATOM    650  H   ILE X  42     205.881 181.578 265.962  0.00  0.00           H  
ATOM    651  HA  ILE X  42     204.750 183.658 267.532  0.00  0.00           H  
ATOM    652  HB  ILE X  42     205.607 183.719 264.560  0.00  0.00           H  
ATOM    653 HG12 ILE X  42     207.677 183.061 265.897  0.00  0.00           H  
ATOM    654 HG13 ILE X  42     207.686 184.715 265.343  0.00  0.00           H  
ATOM    655 HG21 ILE X  42     204.935 186.006 266.550  0.00  0.00           H  
ATOM    656 HG22 ILE X  42     204.463 185.863 264.880  0.00  0.00           H  
ATOM    657 HG23 ILE X  42     206.059 186.255 265.226  0.00  0.00           H  
ATOM    658 HD11 ILE X  42     207.052 185.556 267.448  0.00  0.00           H  
ATOM    659 HD12 ILE X  42     208.410 184.563 267.734  0.00  0.00           H  
ATOM    660 HD13 ILE X  42     206.739 183.942 268.124  0.00  0.00           H  
ATOM    661  N   LEU X  43     202.869 182.687 264.840  0.00  0.00           N  
ATOM    662  CA  LEU X  43     201.456 182.824 264.389  0.00  0.00           C  
ATOM    663  C   LEU X  43     200.331 182.130 265.261  0.00  0.00           C  
ATOM    664  O   LEU X  43     199.205 182.440 265.002  0.00  0.00           O  
ATOM    665  CB  LEU X  43     201.365 182.303 262.909  0.00  0.00           C  
ATOM    666  CG  LEU X  43     202.075 183.137 261.823  0.00  0.00           C  
ATOM    667  CD1 LEU X  43     201.561 182.659 260.437  0.00  0.00           C  
ATOM    668  CD2 LEU X  43     201.662 184.619 261.859  0.00  0.00           C  
ATOM    669  H   LEU X  43     203.303 181.818 264.564  0.00  0.00           H  
ATOM    670  HA  LEU X  43     201.179 183.878 264.384  0.00  0.00           H  
ATOM    671  HB2 LEU X  43     201.720 181.279 262.797  0.00  0.00           H  
ATOM    672  HB3 LEU X  43     200.311 182.216 262.644  0.00  0.00           H  
ATOM    673  HG  LEU X  43     203.149 183.073 261.994  0.00  0.00           H  
ATOM    674 HD11 LEU X  43     201.782 181.651 260.086  0.00  0.00           H  
ATOM    675 HD12 LEU X  43     201.897 183.304 259.625  0.00  0.00           H  
ATOM    676 HD13 LEU X  43     200.477 182.768 260.457  0.00  0.00           H  
ATOM    677 HD21 LEU X  43     202.099 185.179 261.033  0.00  0.00           H  
ATOM    678 HD22 LEU X  43     200.592 184.826 261.893  0.00  0.00           H  
ATOM    679 HD23 LEU X  43     201.971 185.050 262.812  0.00  0.00           H  
ATOM    680  N   GLN X  44     200.686 181.226 266.126  0.00  0.00           N  
ATOM    681  CA  GLN X  44     199.784 180.394 266.812  0.00  0.00           C  
ATOM    682  C   GLN X  44     199.113 181.036 268.081  0.00  0.00           C  
ATOM    683  O   GLN X  44     198.083 180.503 268.399  0.00  0.00           O  
ATOM    684  CB  GLN X  44     200.396 179.088 267.272  0.00  0.00           C  
ATOM    685  CG  GLN X  44     201.283 178.409 266.190  0.00  0.00           C  
ATOM    686  CD  GLN X  44     200.494 178.194 264.905  0.00  0.00           C  
ATOM    687  NE2 GLN X  44     199.402 177.381 265.005  0.00  0.00           N  
ATOM    688  OE1 GLN X  44     200.979 178.728 263.915  0.00  0.00           O  
ATOM    689  H   GLN X  44     201.653 181.262 266.417  0.00  0.00           H  
ATOM    690  HA  GLN X  44     198.924 180.196 266.171  0.00  0.00           H  
ATOM    691  HB2 GLN X  44     201.027 179.396 268.106  0.00  0.00           H  
ATOM    692  HB3 GLN X  44     199.724 178.325 267.664  0.00  0.00           H  
ATOM    693  HG2 GLN X  44     202.220 178.964 266.128  0.00  0.00           H  
ATOM    694  HG3 GLN X  44     201.618 177.429 266.527  0.00  0.00           H  
ATOM    695 HE21 GLN X  44     198.772 177.272 264.223  0.00  0.00           H  
ATOM    696 HE22 GLN X  44     199.176 176.920 265.874  0.00  0.00           H  
ATOM    697  N   ILE X  45     199.619 182.102 268.654  0.00  0.00           N  
ATOM    698  CA  ILE X  45     199.106 182.733 269.816  0.00  0.00           C  
ATOM    699  C   ILE X  45     198.223 184.001 269.539  0.00  0.00           C  
ATOM    700  O   ILE X  45     197.904 184.321 268.426  0.00  0.00           O  
ATOM    701  CB  ILE X  45     200.297 182.989 270.831  0.00  0.00           C  
ATOM    702  CG1 ILE X  45     201.393 183.860 270.262  0.00  0.00           C  
ATOM    703  CG2 ILE X  45     200.755 181.684 271.310  0.00  0.00           C  
ATOM    704  CD1 ILE X  45     201.047 185.298 270.193  0.00  0.00           C  
ATOM    705  H   ILE X  45     200.510 182.449 268.330  0.00  0.00           H  
ATOM    706  HA  ILE X  45     198.500 182.072 270.436  0.00  0.00           H  
ATOM    707  HB  ILE X  45     199.947 183.509 271.723  0.00  0.00           H  
ATOM    708 HG12 ILE X  45     202.305 183.739 270.845  0.00  0.00           H  
ATOM    709 HG13 ILE X  45     201.774 183.603 269.274  0.00  0.00           H  
ATOM    710 HG21 ILE X  45     200.062 181.253 272.033  0.00  0.00           H  
ATOM    711 HG22 ILE X  45     201.686 181.765 271.872  0.00  0.00           H  
ATOM    712 HG23 ILE X  45     200.900 180.971 270.499  0.00  0.00           H  
ATOM    713 HD11 ILE X  45     200.533 185.497 269.253  0.00  0.00           H  
ATOM    714 HD12 ILE X  45     201.977 185.865 270.209  0.00  0.00           H  
ATOM    715 HD13 ILE X  45     200.493 185.589 271.086  0.00  0.00           H  
ATOM    716  N   ASP X  46     197.845 184.741 270.610  0.00  0.00           N  
ATOM    717  CA  ASP X  46     197.220 186.034 270.584  0.00  0.00           C  
ATOM    718  C   ASP X  46     198.006 187.049 271.491  0.00  0.00           C  
ATOM    719  O   ASP X  46     198.223 186.798 272.709  0.00  0.00           O  
ATOM    720  CB  ASP X  46     195.775 185.863 270.907  0.00  0.00           C  
ATOM    721  CG  ASP X  46     194.790 186.896 270.423  0.00  0.00           C  
ATOM    722  OD1 ASP X  46     195.091 188.047 270.625  0.00  0.00           O  
ATOM    723  OD2 ASP X  46     193.710 186.480 269.992  0.00  0.00           O1-
ATOM    724  H   ASP X  46     198.004 184.388 271.543  0.00  0.00           H  
ATOM    725  HA  ASP X  46     197.283 186.458 269.582  0.00  0.00           H  
ATOM    726  HB2 ASP X  46     195.453 184.889 270.540  0.00  0.00           H  
ATOM    727  HB3 ASP X  46     195.753 185.828 271.996  0.00  0.00           H  
ATOM    728  N   ILE X  47     198.457 188.101 270.872  0.00  0.00           N  
ATOM    729  CA  ILE X  47     199.224 189.085 271.687  0.00  0.00           C  
ATOM    730  C   ILE X  47     198.245 190.254 272.096  0.00  0.00           C  
ATOM    731  O   ILE X  47     198.573 190.998 273.030  0.00  0.00           O  
ATOM    732  CB  ILE X  47     200.520 189.420 270.841  0.00  0.00           C  
ATOM    733  CG1 ILE X  47     201.418 190.456 271.493  0.00  0.00           C  
ATOM    734  CG2 ILE X  47     200.110 189.954 269.471  0.00  0.00           C  
ATOM    735  CD1 ILE X  47     202.858 190.199 271.090  0.00  0.00           C  
ATOM    736  H   ILE X  47     198.132 188.266 269.930  0.00  0.00           H  
ATOM    737  HA  ILE X  47     199.682 188.711 272.603  0.00  0.00           H  
ATOM    738  HB  ILE X  47     201.013 188.452 270.752  0.00  0.00           H  
ATOM    739 HG12 ILE X  47     201.089 191.472 271.275  0.00  0.00           H  
ATOM    740 HG13 ILE X  47     201.339 190.452 272.580  0.00  0.00           H  
ATOM    741 HG21 ILE X  47     199.270 190.647 269.528  0.00  0.00           H  
ATOM    742 HG22 ILE X  47     199.863 189.074 268.877  0.00  0.00           H  
ATOM    743 HG23 ILE X  47     200.940 190.370 268.900  0.00  0.00           H  
ATOM    744 HD11 ILE X  47     202.895 189.709 270.117  0.00  0.00           H  
ATOM    745 HD12 ILE X  47     203.354 189.519 271.783  0.00  0.00           H  
ATOM    746 HD13 ILE X  47     203.397 191.146 271.063  0.00  0.00           H  
ATOM    747  N   LYS X  48     196.950 190.267 271.672  0.00  0.00           N  
ATOM    748  CA  LYS X  48     195.949 191.140 272.380  0.00  0.00           C  
ATOM    749  C   LYS X  48     195.102 190.336 273.372  0.00  0.00           C  
ATOM    750  O   LYS X  48     194.804 190.963 274.356  0.00  0.00           O  
ATOM    751  CB  LYS X  48     195.076 191.837 271.379  0.00  0.00           C  
ATOM    752  CG  LYS X  48     195.772 192.881 270.501  0.00  0.00           C  
ATOM    753  CD  LYS X  48     195.112 193.351 269.234  0.00  0.00           C  
ATOM    754  CE  LYS X  48     195.255 192.412 267.994  0.00  0.00           C  
ATOM    755  NZ  LYS X  48     194.621 193.100 266.863  0.00  0.00           N1+
ATOM    756  H   LYS X  48     196.495 189.676 270.991  0.00  0.00           H  
ATOM    757  HA  LYS X  48     196.456 191.923 272.944  0.00  0.00           H  
ATOM    758  HB2 LYS X  48     194.556 191.146 270.716  0.00  0.00           H  
ATOM    759  HB3 LYS X  48     194.239 192.338 271.866  0.00  0.00           H  
ATOM    760  HG2 LYS X  48     195.987 193.731 271.148  0.00  0.00           H  
ATOM    761  HG3 LYS X  48     196.729 192.468 270.183  0.00  0.00           H  
ATOM    762  HD2 LYS X  48     194.073 193.626 269.419  0.00  0.00           H  
ATOM    763  HD3 LYS X  48     195.560 194.320 269.016  0.00  0.00           H  
ATOM    764  HE2 LYS X  48     196.309 192.155 267.885  0.00  0.00           H  
ATOM    765  HE3 LYS X  48     194.593 191.602 268.302  0.00  0.00           H  
ATOM    766  HZ1 LYS X  48     194.621 192.574 266.001  0.00  0.00           H  
ATOM    767  HZ2 LYS X  48     194.853 194.055 266.628  0.00  0.00           H  
ATOM    768  HZ3 LYS X  48     193.639 193.226 267.061  0.00  0.00           H  
ATOM    769  N   ASP X  49     194.764 189.024 273.133  0.00  0.00           N  
ATOM    770  CA  ASP X  49     193.993 188.145 274.065  0.00  0.00           C  
ATOM    771  C   ASP X  49     194.943 187.173 274.773  0.00  0.00           C  
ATOM    772  O   ASP X  49     194.790 186.003 274.638  0.00  0.00           O  
ATOM    773  CB  ASP X  49     192.666 187.597 273.475  0.00  0.00           C  
ATOM    774  CG  ASP X  49     192.050 188.664 272.632  0.00  0.00           C  
ATOM    775  OD1 ASP X  49     192.056 188.584 271.382  0.00  0.00           O  
ATOM    776  OD2 ASP X  49     191.379 189.587 273.198  0.00  0.00           O1-
ATOM    777  H   ASP X  49     194.928 188.644 272.211  0.00  0.00           H  
ATOM    778  HA  ASP X  49     193.591 188.828 274.814  0.00  0.00           H  
ATOM    779  HB2 ASP X  49     192.801 186.736 272.820  0.00  0.00           H  
ATOM    780  HB3 ASP X  49     192.030 187.452 274.349  0.00  0.00           H  
ATOM    781  N   VAL X  50     195.874 187.707 275.545  0.00  0.00           N  
ATOM    782  CA  VAL X  50     197.021 186.875 275.915  0.00  0.00           C  
ATOM    783  C   VAL X  50     196.578 185.650 276.798  0.00  0.00           C  
ATOM    784  O   VAL X  50     196.933 184.503 276.381  0.00  0.00           O  
ATOM    785  CB  VAL X  50     198.106 187.724 276.619  0.00  0.00           C  
ATOM    786  CG1 VAL X  50     199.348 186.948 277.008  0.00  0.00           C  
ATOM    787  CG2 VAL X  50     198.571 188.918 275.798  0.00  0.00           C  
ATOM    788  H   VAL X  50     195.935 188.683 275.798  0.00  0.00           H  
ATOM    789  HA  VAL X  50     197.504 186.604 274.976  0.00  0.00           H  
ATOM    790  HB  VAL X  50     197.699 188.112 277.553  0.00  0.00           H  
ATOM    791 HG11 VAL X  50     199.094 186.059 277.586  0.00  0.00           H  
ATOM    792 HG12 VAL X  50     199.951 186.658 276.148  0.00  0.00           H  
ATOM    793 HG13 VAL X  50     199.924 187.606 277.659  0.00  0.00           H  
ATOM    794 HG21 VAL X  50     198.821 188.538 274.807  0.00  0.00           H  
ATOM    795 HG22 VAL X  50     199.425 189.437 276.232  0.00  0.00           H  
ATOM    796 HG23 VAL X  50     197.681 189.548 275.792  0.00  0.00           H  
ATOM    797  N   SER X  51     195.810 185.892 277.858  0.00  0.00           N  
ATOM    798  CA  SER X  51     195.329 184.947 278.886  0.00  0.00           C  
ATOM    799  C   SER X  51     194.304 184.041 278.181  0.00  0.00           C  
ATOM    800  O   SER X  51     194.423 182.825 278.416  0.00  0.00           O  
ATOM    801  CB  SER X  51     194.659 185.694 280.038  0.00  0.00           C  
ATOM    802  OG  SER X  51     193.556 186.455 279.729  0.00  0.00           O  
ATOM    803  H   SER X  51     195.407 186.819 277.862  0.00  0.00           H  
ATOM    804  HA  SER X  51     196.229 184.386 279.139  0.00  0.00           H  
ATOM    805  HB2 SER X  51     194.253 184.966 280.739  0.00  0.00           H  
ATOM    806  HB3 SER X  51     195.349 186.393 280.511  0.00  0.00           H  
ATOM    807  HG  SER X  51     193.840 187.258 279.286  0.00  0.00           H  
ATOM    808  N   LYS X  52     193.507 184.596 277.274  0.00  0.00           N  
ATOM    809  CA  LYS X  52     192.490 183.830 276.516  0.00  0.00           C  
ATOM    810  C   LYS X  52     193.291 182.771 275.696  0.00  0.00           C  
ATOM    811  O   LYS X  52     192.895 181.614 275.814  0.00  0.00           O  
ATOM    812  CB  LYS X  52     191.485 184.542 275.641  0.00  0.00           C  
ATOM    813  CG  LYS X  52     190.601 185.549 276.357  0.00  0.00           C  
ATOM    814  CD  LYS X  52     189.680 184.789 277.316  0.00  0.00           C  
ATOM    815  CE  LYS X  52     188.511 185.607 277.811  0.00  0.00           C  
ATOM    816  NZ  LYS X  52     188.728 186.614 278.830  0.00  0.00           N1+
ATOM    817  H   LYS X  52     193.766 185.541 277.031  0.00  0.00           H  
ATOM    818  HA  LYS X  52     191.948 183.128 277.151  0.00  0.00           H  
ATOM    819  HB2 LYS X  52     192.008 185.062 274.838  0.00  0.00           H  
ATOM    820  HB3 LYS X  52     190.815 183.827 275.164  0.00  0.00           H  
ATOM    821  HG2 LYS X  52     191.174 186.296 276.905  0.00  0.00           H  
ATOM    822  HG3 LYS X  52     189.990 185.944 275.546  0.00  0.00           H  
ATOM    823  HD2 LYS X  52     189.195 183.929 276.855  0.00  0.00           H  
ATOM    824  HD3 LYS X  52     190.347 184.446 278.107  0.00  0.00           H  
ATOM    825  HE2 LYS X  52     188.020 186.070 276.955  0.00  0.00           H  
ATOM    826  HE3 LYS X  52     187.708 184.995 278.221  0.00  0.00           H  
ATOM    827  HZ1 LYS X  52     189.609 187.109 278.832  0.00  0.00           H  
ATOM    828  HZ2 LYS X  52     188.731 186.110 279.706  0.00  0.00           H  
ATOM    829  HZ3 LYS X  52     187.914 187.207 278.898  0.00  0.00           H  
ATOM    830  N   SER X  53     194.376 183.198 275.034  0.00  0.00           N  
ATOM    831  CA  SER X  53     195.184 182.302 274.141  0.00  0.00           C  
ATOM    832  C   SER X  53     196.072 181.294 274.922  0.00  0.00           C  
ATOM    833  O   SER X  53     196.008 180.107 274.627  0.00  0.00           O  
ATOM    834  CB  SER X  53     196.116 183.224 273.316  0.00  0.00           C  
ATOM    835  OG  SER X  53     197.107 182.541 272.623  0.00  0.00           O  
ATOM    836  H   SER X  53     194.542 184.194 275.056  0.00  0.00           H  
ATOM    837  HA  SER X  53     194.436 181.863 273.481  0.00  0.00           H  
ATOM    838  HB2 SER X  53     195.645 183.834 272.545  0.00  0.00           H  
ATOM    839  HB3 SER X  53     196.533 184.001 273.956  0.00  0.00           H  
ATOM    840  HG  SER X  53     196.604 182.085 271.944  0.00  0.00           H  
ATOM    841  N   LEU X  54     196.736 181.666 276.045  0.00  0.00           N  
ATOM    842  CA  LEU X  54     197.448 180.700 276.969  0.00  0.00           C  
ATOM    843  C   LEU X  54     196.442 179.694 277.518  0.00  0.00           C  
ATOM    844  O   LEU X  54     196.629 178.527 277.670  0.00  0.00           O  
ATOM    845  CB  LEU X  54     198.144 181.368 278.132  0.00  0.00           C  
ATOM    846  CG  LEU X  54     199.544 181.925 277.943  0.00  0.00           C  
ATOM    847  CD1 LEU X  54     199.684 182.686 276.623  0.00  0.00           C  
ATOM    848  CD2 LEU X  54     199.914 182.957 278.947  0.00  0.00           C  
ATOM    849  H   LEU X  54     196.660 182.599 276.423  0.00  0.00           H  
ATOM    850  HA  LEU X  54     198.142 180.078 276.403  0.00  0.00           H  
ATOM    851  HB2 LEU X  54     197.544 182.265 278.286  0.00  0.00           H  
ATOM    852  HB3 LEU X  54     198.081 180.838 279.082  0.00  0.00           H  
ATOM    853  HG  LEU X  54     200.340 181.180 277.960  0.00  0.00           H  
ATOM    854 HD11 LEU X  54     198.975 183.475 276.374  0.00  0.00           H  
ATOM    855 HD12 LEU X  54     199.785 182.053 275.741  0.00  0.00           H  
ATOM    856 HD13 LEU X  54     200.694 183.093 276.574  0.00  0.00           H  
ATOM    857 HD21 LEU X  54     199.946 182.680 280.001  0.00  0.00           H  
ATOM    858 HD22 LEU X  54     200.879 183.352 278.627  0.00  0.00           H  
ATOM    859 HD23 LEU X  54     199.101 183.684 278.951  0.00  0.00           H  
ATOM    860  N   THR X  55     195.248 180.132 277.922  0.00  0.00           N  
ATOM    861  CA  THR X  55     194.137 179.261 278.429  0.00  0.00           C  
ATOM    862  C   THR X  55     193.540 178.310 277.345  0.00  0.00           C  
ATOM    863  O   THR X  55     193.249 177.136 277.572  0.00  0.00           O  
ATOM    864  CB  THR X  55     193.050 180.065 279.147  0.00  0.00           C  
ATOM    865  CG2 THR X  55     191.880 179.136 279.572  0.00  0.00           C  
ATOM    866  OG1 THR X  55     193.658 180.671 280.276  0.00  0.00           O  
ATOM    867  H   THR X  55     195.153 181.137 277.898  0.00  0.00           H  
ATOM    868  HA  THR X  55     194.510 178.593 279.205  0.00  0.00           H  
ATOM    869  HB  THR X  55     192.607 180.880 278.574  0.00  0.00           H  
ATOM    870  HG1 THR X  55     194.285 181.286 279.889  0.00  0.00           H  
ATOM    871 HG21 THR X  55     191.218 179.751 280.182  0.00  0.00           H  
ATOM    872 HG22 THR X  55     192.260 178.260 280.097  0.00  0.00           H  
ATOM    873 HG23 THR X  55     191.210 178.963 278.730  0.00  0.00           H  
ATOM    874  N   ASN X  56     193.365 178.890 276.203  0.00  0.00           N  
ATOM    875  CA  ASN X  56     192.712 178.192 275.006  0.00  0.00           C  
ATOM    876  C   ASN X  56     193.774 177.147 274.422  0.00  0.00           C  
ATOM    877  O   ASN X  56     193.356 176.061 273.964  0.00  0.00           O  
ATOM    878  CB  ASN X  56     192.445 179.256 274.036  0.00  0.00           C  
ATOM    879  CG  ASN X  56     191.679 178.790 272.772  0.00  0.00           C  
ATOM    880  ND2 ASN X  56     190.410 178.981 272.757  0.00  0.00           N  
ATOM    881  OD1 ASN X  56     192.191 178.347 271.738  0.00  0.00           O  
ATOM    882  H   ASN X  56     193.541 179.872 276.041  0.00  0.00           H  
ATOM    883  HA  ASN X  56     191.819 177.580 275.135  0.00  0.00           H  
ATOM    884  HB2 ASN X  56     191.770 179.979 274.493  0.00  0.00           H  
ATOM    885  HB3 ASN X  56     193.385 179.747 273.782  0.00  0.00           H  
ATOM    886 HD21 ASN X  56     189.943 179.382 273.557  0.00  0.00           H  
ATOM    887 HD22 ASN X  56     189.932 178.724 271.905  0.00  0.00           H  
ATOM    888  N   LEU X  57     195.047 177.495 274.435  0.00  0.00           N  
ATOM    889  CA  LEU X  57     195.993 176.439 274.080  0.00  0.00           C  
ATOM    890  C   LEU X  57     196.233 175.290 275.085  0.00  0.00           C  
ATOM    891  O   LEU X  57     196.544 174.123 274.739  0.00  0.00           O  
ATOM    892  CB  LEU X  57     197.314 177.214 273.665  0.00  0.00           C  
ATOM    893  CG  LEU X  57     197.199 178.138 272.387  0.00  0.00           C  
ATOM    894  CD1 LEU X  57     198.479 178.922 272.417  0.00  0.00           C  
ATOM    895  CD2 LEU X  57     196.965 177.404 271.027  0.00  0.00           C  
ATOM    896  H   LEU X  57     195.340 178.435 274.659  0.00  0.00           H  
ATOM    897  HA  LEU X  57     195.661 175.869 273.212  0.00  0.00           H  
ATOM    898  HB2 LEU X  57     197.607 177.773 274.554  0.00  0.00           H  
ATOM    899  HB3 LEU X  57     198.061 176.442 273.480  0.00  0.00           H  
ATOM    900  HG  LEU X  57     196.504 178.970 272.501  0.00  0.00           H  
ATOM    901 HD11 LEU X  57     198.555 179.514 271.504  0.00  0.00           H  
ATOM    902 HD12 LEU X  57     199.323 178.235 272.355  0.00  0.00           H  
ATOM    903 HD13 LEU X  57     198.494 179.628 273.247  0.00  0.00           H  
ATOM    904 HD21 LEU X  57     197.046 178.095 270.188  0.00  0.00           H  
ATOM    905 HD22 LEU X  57     197.811 176.760 270.786  0.00  0.00           H  
ATOM    906 HD23 LEU X  57     196.008 176.885 270.967  0.00  0.00           H  
ATOM    907  N   SER X  58     196.024 175.485 276.387  0.00  0.00           N  
ATOM    908  CA  SER X  58     196.066 174.431 277.431  0.00  0.00           C  
ATOM    909  C   SER X  58     194.983 173.302 277.188  0.00  0.00           C  
ATOM    910  O   SER X  58     195.331 172.090 277.346  0.00  0.00           O  
ATOM    911  CB  SER X  58     195.929 175.047 278.809  0.00  0.00           C  
ATOM    912  OG  SER X  58     195.931 174.121 279.869  0.00  0.00           O  
ATOM    913  H   SER X  58     195.773 176.420 276.675  0.00  0.00           H  
ATOM    914  HA  SER X  58     197.062 174.002 277.320  0.00  0.00           H  
ATOM    915  HB2 SER X  58     196.756 175.734 278.986  0.00  0.00           H  
ATOM    916  HB3 SER X  58     195.079 175.728 278.772  0.00  0.00           H  
ATOM    917  HG  SER X  58     196.853 173.864 279.934  0.00  0.00           H  
ATOM    918  N   LYS X  59     193.767 173.711 276.818  0.00  0.00           N  
ATOM    919  CA  LYS X  59     192.664 172.812 276.522  0.00  0.00           C  
ATOM    920  C   LYS X  59     192.900 171.843 275.388  0.00  0.00           C  
ATOM    921  O   LYS X  59     192.300 170.758 275.410  0.00  0.00           O  
ATOM    922  CB  LYS X  59     191.303 173.535 276.468  0.00  0.00           C  
ATOM    923  CG  LYS X  59     191.094 174.354 277.732  0.00  0.00           C  
ATOM    924  CD  LYS X  59     189.747 175.133 277.895  0.00  0.00           C  
ATOM    925  CE  LYS X  59     189.256 175.937 276.640  0.00  0.00           C  
ATOM    926  NZ  LYS X  59     187.943 175.351 276.177  0.00  0.00           N1+
ATOM    927  H   LYS X  59     193.668 174.713 276.730  0.00  0.00           H  
ATOM    928  HA  LYS X  59     192.619 172.068 277.317  0.00  0.00           H  
ATOM    929  HB2 LYS X  59     191.305 174.231 275.629  0.00  0.00           H  
ATOM    930  HB3 LYS X  59     190.611 172.692 276.466  0.00  0.00           H  
ATOM    931  HG2 LYS X  59     191.043 173.730 278.624  0.00  0.00           H  
ATOM    932  HG3 LYS X  59     191.891 175.097 277.714  0.00  0.00           H  
ATOM    933  HD2 LYS X  59     189.065 174.385 278.300  0.00  0.00           H  
ATOM    934  HD3 LYS X  59     189.882 175.823 278.728  0.00  0.00           H  
ATOM    935  HE2 LYS X  59     189.205 177.008 276.838  0.00  0.00           H  
ATOM    936  HE3 LYS X  59     189.989 175.799 275.845  0.00  0.00           H  
ATOM    937  HZ1 LYS X  59     187.141 175.649 276.714  0.00  0.00           H  
ATOM    938  HZ2 LYS X  59     187.909 174.342 276.140  0.00  0.00           H  
ATOM    939  HZ3 LYS X  59     187.832 175.709 275.239  0.00  0.00           H  
ATOM    940  N   ILE X  60     193.897 172.156 274.479  0.00  0.00           N  
ATOM    941  CA  ILE X  60     194.441 171.186 273.441  0.00  0.00           C  
ATOM    942  C   ILE X  60     195.459 170.289 273.992  0.00  0.00           C  
ATOM    943  O   ILE X  60     195.686 169.167 273.447  0.00  0.00           O  
ATOM    944  CB  ILE X  60     194.945 172.083 272.256  0.00  0.00           C  
ATOM    945  CG1 ILE X  60     193.714 172.746 271.576  0.00  0.00           C  
ATOM    946  CG2 ILE X  60     195.702 171.218 271.213  0.00  0.00           C  
ATOM    947  CD1 ILE X  60     193.955 174.052 270.759  0.00  0.00           C  
ATOM    948  H   ILE X  60     194.296 173.084 274.473  0.00  0.00           H  
ATOM    949  HA  ILE X  60     193.617 170.602 273.034  0.00  0.00           H  
ATOM    950  HB  ILE X  60     195.563 172.887 272.657  0.00  0.00           H  
ATOM    951 HG12 ILE X  60     193.183 172.080 270.897  0.00  0.00           H  
ATOM    952 HG13 ILE X  60     193.033 173.090 272.354  0.00  0.00           H  
ATOM    953 HG21 ILE X  60     195.107 170.324 271.027  0.00  0.00           H  
ATOM    954 HG22 ILE X  60     196.681 170.877 271.550  0.00  0.00           H  
ATOM    955 HG23 ILE X  60     195.874 171.762 270.284  0.00  0.00           H  
ATOM    956 HD11 ILE X  60     194.920 174.105 270.254  0.00  0.00           H  
ATOM    957 HD12 ILE X  60     194.001 174.895 271.449  0.00  0.00           H  
ATOM    958 HD13 ILE X  60     193.134 174.227 270.064  0.00  0.00           H  
ATOM    959  N   TYR X  61     196.143 170.595 275.088  0.00  0.00           N  
ATOM    960  CA  TYR X  61     197.399 170.033 275.545  0.00  0.00           C  
ATOM    961  C   TYR X  61     197.224 169.201 276.856  0.00  0.00           C  
ATOM    962  O   TYR X  61     198.092 168.360 277.184  0.00  0.00           O  
ATOM    963  CB  TYR X  61     198.359 171.126 275.777  0.00  0.00           C  
ATOM    964  CG  TYR X  61     199.761 170.633 275.513  0.00  0.00           C  
ATOM    965  CD1 TYR X  61     200.475 169.997 276.558  0.00  0.00           C  
ATOM    966  CD2 TYR X  61     200.356 170.696 274.269  0.00  0.00           C  
ATOM    967  CE1 TYR X  61     201.703 169.405 276.345  0.00  0.00           C  
ATOM    968  CE2 TYR X  61     201.652 170.246 274.072  0.00  0.00           C  
ATOM    969  CZ  TYR X  61     202.346 169.573 275.088  0.00  0.00           C  
ATOM    970  OH  TYR X  61     203.522 169.086 274.899  0.00  0.00           O  
ATOM    971  H   TYR X  61     195.848 171.441 275.554  0.00  0.00           H  
ATOM    972  HA  TYR X  61     197.785 169.495 274.680  0.00  0.00           H  
ATOM    973  HB2 TYR X  61     198.090 171.984 275.161  0.00  0.00           H  
ATOM    974  HB3 TYR X  61     198.407 171.545 276.782  0.00  0.00           H  
ATOM    975  HD1 TYR X  61     200.058 169.987 277.554  0.00  0.00           H  
ATOM    976  HD2 TYR X  61     199.892 171.262 273.475  0.00  0.00           H  
ATOM    977  HE1 TYR X  61     202.256 168.982 277.171  0.00  0.00           H  
ATOM    978  HE2 TYR X  61     202.062 170.343 273.077  0.00  0.00           H  
ATOM    979  HH  TYR X  61     203.885 168.606 275.647  0.00  0.00           H  
ATOM    980  N   GLY X  62     196.244 169.423 277.686  0.00  0.00           N  
ATOM    981  CA  GLY X  62     196.152 168.949 279.099  0.00  0.00           C  
ATOM    982  C   GLY X  62     196.720 169.919 280.184  0.00  0.00           C  
ATOM    983  O   GLY X  62     197.027 171.102 279.904  0.00  0.00           O  
ATOM    984  H   GLY X  62     195.662 170.211 277.438  0.00  0.00           H  
ATOM    985  HA2 GLY X  62     195.158 168.638 279.421  0.00  0.00           H  
ATOM    986  HA3 GLY X  62     196.684 167.997 279.079  0.00  0.00           H  
ATOM    987  N   PRO X  63     196.892 169.488 281.473  0.00  0.00           N  
ATOM    988  CA  PRO X  63     197.190 170.450 282.608  0.00  0.00           C  
ATOM    989  C   PRO X  63     198.561 171.136 282.643  0.00  0.00           C  
ATOM    990  O   PRO X  63     198.642 172.296 283.042  0.00  0.00           O  
ATOM    991  CB  PRO X  63     196.956 169.590 283.840  0.00  0.00           C  
ATOM    992  CG  PRO X  63     197.322 168.203 283.380  0.00  0.00           C  
ATOM    993  CD  PRO X  63     196.861 168.133 281.958  0.00  0.00           C  
ATOM    994  HA  PRO X  63     196.431 171.227 282.522  0.00  0.00           H  
ATOM    995  HB2 PRO X  63     197.625 169.858 284.657  0.00  0.00           H  
ATOM    996  HB3 PRO X  63     195.879 169.714 283.951  0.00  0.00           H  
ATOM    997  HG2 PRO X  63     198.407 168.111 283.336  0.00  0.00           H  
ATOM    998  HG3 PRO X  63     196.848 167.430 283.985  0.00  0.00           H  
ATOM    999  HD2 PRO X  63     197.442 167.426 281.366  0.00  0.00           H  
ATOM   1000  HD3 PRO X  63     195.827 167.791 281.998  0.00  0.00           H  
ATOM   1001  N   VAL X  64     199.677 170.453 282.191  0.00  0.00           N  
ATOM   1002  CA  VAL X  64     201.051 171.117 282.152  0.00  0.00           C  
ATOM   1003  C   VAL X  64     201.529 171.259 280.666  0.00  0.00           C  
ATOM   1004  O   VAL X  64     201.682 170.264 279.979  0.00  0.00           O  
ATOM   1005  CB  VAL X  64     202.111 170.430 283.075  0.00  0.00           C  
ATOM   1006  CG1 VAL X  64     202.069 168.902 283.000  0.00  0.00           C  
ATOM   1007  CG2 VAL X  64     203.556 171.048 282.847  0.00  0.00           C  
ATOM   1008  H   VAL X  64     199.445 169.588 281.724  0.00  0.00           H  
ATOM   1009  HA  VAL X  64     201.003 172.156 282.477  0.00  0.00           H  
ATOM   1010  HB  VAL X  64     201.921 170.652 284.125  0.00  0.00           H  
ATOM   1011 HG11 VAL X  64     201.044 168.545 283.100  0.00  0.00           H  
ATOM   1012 HG12 VAL X  64     202.606 168.717 282.070  0.00  0.00           H  
ATOM   1013 HG13 VAL X  64     202.822 168.556 283.708  0.00  0.00           H  
ATOM   1014 HG21 VAL X  64     203.527 172.138 282.852  0.00  0.00           H  
ATOM   1015 HG22 VAL X  64     204.017 170.855 281.878  0.00  0.00           H  
ATOM   1016 HG23 VAL X  64     204.176 170.722 283.682  0.00  0.00           H  
ATOM   1017  N   PHE X  65     201.714 172.462 280.182  0.00  0.00           N  
ATOM   1018  CA  PHE X  65     201.932 172.832 278.755  0.00  0.00           C  
ATOM   1019  C   PHE X  65     203.196 173.689 278.559  0.00  0.00           C  
ATOM   1020  O   PHE X  65     203.209 174.869 278.946  0.00  0.00           O  
ATOM   1021  CB  PHE X  65     200.709 173.639 278.213  0.00  0.00           C  
ATOM   1022  CG  PHE X  65     200.799 174.263 276.855  0.00  0.00           C  
ATOM   1023  CD1 PHE X  65     201.411 173.675 275.804  0.00  0.00           C  
ATOM   1024  CD2 PHE X  65     200.183 175.553 276.709  0.00  0.00           C  
ATOM   1025  CE1 PHE X  65     201.460 174.340 274.531  0.00  0.00           C  
ATOM   1026  CE2 PHE X  65     200.195 176.224 275.495  0.00  0.00           C  
ATOM   1027  CZ  PHE X  65     200.896 175.661 274.435  0.00  0.00           C  
ATOM   1028  H   PHE X  65     201.769 173.194 280.875  0.00  0.00           H  
ATOM   1029  HA  PHE X  65     202.004 171.890 278.211  0.00  0.00           H  
ATOM   1030  HB2 PHE X  65     199.861 172.955 278.231  0.00  0.00           H  
ATOM   1031  HB3 PHE X  65     200.596 174.421 278.963  0.00  0.00           H  
ATOM   1032  HD1 PHE X  65     201.821 172.677 275.854  0.00  0.00           H  
ATOM   1033  HD2 PHE X  65     199.665 176.036 277.524  0.00  0.00           H  
ATOM   1034  HE1 PHE X  65     201.813 173.825 273.650  0.00  0.00           H  
ATOM   1035  HE2 PHE X  65     199.651 177.156 275.538  0.00  0.00           H  
ATOM   1036  HZ  PHE X  65     200.965 176.200 273.501  0.00  0.00           H  
ATOM   1037  N   THR X  66     204.237 173.148 277.948  0.00  0.00           N  
ATOM   1038  CA  THR X  66     205.328 173.902 277.243  0.00  0.00           C  
ATOM   1039  C   THR X  66     204.883 174.672 276.007  0.00  0.00           C  
ATOM   1040  O   THR X  66     205.160 174.225 274.920  0.00  0.00           O  
ATOM   1041  CB  THR X  66     206.608 173.135 276.941  0.00  0.00           C  
ATOM   1042  CG2 THR X  66     207.735 174.153 276.565  0.00  0.00           C  
ATOM   1043  OG1 THR X  66     207.097 172.507 278.112  0.00  0.00           O  
ATOM   1044  H   THR X  66     204.225 172.149 277.795  0.00  0.00           H  
ATOM   1045  HA  THR X  66     205.618 174.676 277.954  0.00  0.00           H  
ATOM   1046  HB  THR X  66     206.382 172.385 276.183  0.00  0.00           H  
ATOM   1047  HG1 THR X  66     206.392 171.940 278.435  0.00  0.00           H  
ATOM   1048 HG21 THR X  66     207.388 174.610 275.639  0.00  0.00           H  
ATOM   1049 HG22 THR X  66     208.590 173.503 276.377  0.00  0.00           H  
ATOM   1050 HG23 THR X  66     207.792 174.954 277.301  0.00  0.00           H  
ATOM   1051  N   LEU X  67     204.297 175.794 276.199  0.00  0.00           N  
ATOM   1052  CA  LEU X  67     204.109 176.840 275.167  0.00  0.00           C  
ATOM   1053  C   LEU X  67     205.519 177.268 274.718  0.00  0.00           C  
ATOM   1054  O   LEU X  67     206.484 177.347 275.477  0.00  0.00           O  
ATOM   1055  CB  LEU X  67     203.292 177.992 275.723  0.00  0.00           C  
ATOM   1056  CG  LEU X  67     203.132 179.260 274.828  0.00  0.00           C  
ATOM   1057  CD1 LEU X  67     202.350 178.937 273.573  0.00  0.00           C  
ATOM   1058  CD2 LEU X  67     202.445 180.363 275.493  0.00  0.00           C  
ATOM   1059  H   LEU X  67     204.125 176.052 277.160  0.00  0.00           H  
ATOM   1060  HA  LEU X  67     203.513 176.435 274.349  0.00  0.00           H  
ATOM   1061  HB2 LEU X  67     202.261 177.676 275.880  0.00  0.00           H  
ATOM   1062  HB3 LEU X  67     203.662 178.273 276.709  0.00  0.00           H  
ATOM   1063  HG  LEU X  67     204.137 179.649 274.666  0.00  0.00           H  
ATOM   1064 HD11 LEU X  67     201.275 178.760 273.594  0.00  0.00           H  
ATOM   1065 HD12 LEU X  67     202.805 178.056 273.119  0.00  0.00           H  
ATOM   1066 HD13 LEU X  67     202.494 179.724 272.833  0.00  0.00           H  
ATOM   1067 HD21 LEU X  67     203.029 180.719 276.342  0.00  0.00           H  
ATOM   1068 HD22 LEU X  67     202.275 181.181 274.792  0.00  0.00           H  
ATOM   1069 HD23 LEU X  67     201.507 180.037 275.942  0.00  0.00           H  
ATOM   1070  N   TYR X  68     205.628 177.679 273.439  0.00  0.00           N  
ATOM   1071  CA  TYR X  68     206.912 178.311 272.901  0.00  0.00           C  
ATOM   1072  C   TYR X  68     206.670 179.692 272.363  0.00  0.00           C  
ATOM   1073  O   TYR X  68     205.551 179.903 271.791  0.00  0.00           O  
ATOM   1074  CB  TYR X  68     207.268 177.546 271.690  0.00  0.00           C  
ATOM   1075  CG  TYR X  68     208.060 176.294 271.982  0.00  0.00           C  
ATOM   1076  CD1 TYR X  68     207.336 175.254 272.548  0.00  0.00           C  
ATOM   1077  CD2 TYR X  68     209.341 175.991 271.472  0.00  0.00           C  
ATOM   1078  CE1 TYR X  68     208.012 174.030 272.925  0.00  0.00           C  
ATOM   1079  CE2 TYR X  68     210.019 174.756 271.755  0.00  0.00           C  
ATOM   1080  CZ  TYR X  68     209.359 173.837 272.630  0.00  0.00           C  
ATOM   1081  OH  TYR X  68     209.832 172.633 273.024  0.00  0.00           O  
ATOM   1082  H   TYR X  68     204.869 177.659 272.773  0.00  0.00           H  
ATOM   1083  HA  TYR X  68     207.735 178.317 273.616  0.00  0.00           H  
ATOM   1084  HB2 TYR X  68     206.385 177.315 271.095  0.00  0.00           H  
ATOM   1085  HB3 TYR X  68     207.830 178.083 270.926  0.00  0.00           H  
ATOM   1086  HD1 TYR X  68     206.329 175.405 272.909  0.00  0.00           H  
ATOM   1087  HD2 TYR X  68     209.921 176.672 270.866  0.00  0.00           H  
ATOM   1088  HE1 TYR X  68     207.495 173.253 273.468  0.00  0.00           H  
ATOM   1089  HE2 TYR X  68     211.077 174.650 271.567  0.00  0.00           H  
ATOM   1090  HH  TYR X  68     209.085 172.123 273.349  0.00  0.00           H  
ATOM   1091  N   PHE X  69     207.568 180.694 272.426  0.00  0.00           N  
ATOM   1092  CA  PHE X  69     207.450 181.838 271.598  0.00  0.00           C  
ATOM   1093  C   PHE X  69     208.815 182.437 271.068  0.00  0.00           C  
ATOM   1094  O   PHE X  69     209.579 182.992 271.836  0.00  0.00           O  
ATOM   1095  CB  PHE X  69     206.668 182.987 272.247  0.00  0.00           C  
ATOM   1096  CG  PHE X  69     206.374 184.152 271.352  0.00  0.00           C  
ATOM   1097  CD1 PHE X  69     205.189 184.255 270.618  0.00  0.00           C  
ATOM   1098  CD2 PHE X  69     207.232 185.324 271.492  0.00  0.00           C  
ATOM   1099  CE1 PHE X  69     204.872 185.422 269.905  0.00  0.00           C  
ATOM   1100  CE2 PHE X  69     206.963 186.376 270.570  0.00  0.00           C  
ATOM   1101  CZ  PHE X  69     205.739 186.458 269.845  0.00  0.00           C  
ATOM   1102  H   PHE X  69     208.364 180.478 273.008  0.00  0.00           H  
ATOM   1103  HA  PHE X  69     207.000 181.522 270.657  0.00  0.00           H  
ATOM   1104  HB2 PHE X  69     205.762 182.634 272.740  0.00  0.00           H  
ATOM   1105  HB3 PHE X  69     207.199 183.372 273.117  0.00  0.00           H  
ATOM   1106  HD1 PHE X  69     204.455 183.463 270.615  0.00  0.00           H  
ATOM   1107  HD2 PHE X  69     208.076 185.329 272.166  0.00  0.00           H  
ATOM   1108  HE1 PHE X  69     203.974 185.478 269.307  0.00  0.00           H  
ATOM   1109  HE2 PHE X  69     207.636 187.220 270.558  0.00  0.00           H  
ATOM   1110  HZ  PHE X  69     205.660 187.335 269.220  0.00  0.00           H  
ATOM   1111  N   GLY X  70     209.133 182.287 269.777  0.00  0.00           N  
ATOM   1112  CA  GLY X  70     210.368 182.855 269.295  0.00  0.00           C  
ATOM   1113  C   GLY X  70     211.547 182.060 269.998  0.00  0.00           C  
ATOM   1114  O   GLY X  70     211.511 180.817 269.875  0.00  0.00           O  
ATOM   1115  H   GLY X  70     208.467 181.948 269.098  0.00  0.00           H  
ATOM   1116  HA2 GLY X  70     210.365 182.882 268.205  0.00  0.00           H  
ATOM   1117  HA3 GLY X  70     210.250 183.915 269.520  0.00  0.00           H  
ATOM   1118  N   LEU X  71     212.457 182.768 270.593  0.00  0.00           N  
ATOM   1119  CA  LEU X  71     213.631 182.148 271.252  0.00  0.00           C  
ATOM   1120  C   LEU X  71     213.321 181.628 272.748  0.00  0.00           C  
ATOM   1121  O   LEU X  71     214.263 181.213 273.434  0.00  0.00           O  
ATOM   1122  CB  LEU X  71     214.664 183.232 271.417  0.00  0.00           C  
ATOM   1123  CG  LEU X  71     215.168 183.824 270.114  0.00  0.00           C  
ATOM   1124  CD1 LEU X  71     216.314 184.751 270.267  0.00  0.00           C  
ATOM   1125  CD2 LEU X  71     215.514 182.830 268.995  0.00  0.00           C  
ATOM   1126  H   LEU X  71     212.268 183.750 270.739  0.00  0.00           H  
ATOM   1127  HA  LEU X  71     213.951 181.360 270.570  0.00  0.00           H  
ATOM   1128  HB2 LEU X  71     214.207 184.072 271.941  0.00  0.00           H  
ATOM   1129  HB3 LEU X  71     215.547 182.904 271.964  0.00  0.00           H  
ATOM   1130  HG  LEU X  71     214.352 184.447 269.747  0.00  0.00           H  
ATOM   1131 HD11 LEU X  71     216.726 184.786 269.259  0.00  0.00           H  
ATOM   1132 HD12 LEU X  71     217.049 184.328 270.953  0.00  0.00           H  
ATOM   1133 HD13 LEU X  71     215.964 185.709 270.650  0.00  0.00           H  
ATOM   1134 HD21 LEU X  71     216.329 182.199 269.350  0.00  0.00           H  
ATOM   1135 HD22 LEU X  71     214.716 182.104 268.844  0.00  0.00           H  
ATOM   1136 HD23 LEU X  71     215.650 183.271 268.008  0.00  0.00           H  
ATOM   1137  N   GLU X  72     212.046 181.672 273.208  0.00  0.00           N  
ATOM   1138  CA  GLU X  72     211.648 181.345 274.632  0.00  0.00           C  
ATOM   1139  C   GLU X  72     210.875 180.029 274.646  0.00  0.00           C  
ATOM   1140  O   GLU X  72     210.049 179.799 273.737  0.00  0.00           O  
ATOM   1141  CB  GLU X  72     210.788 182.475 275.361  0.00  0.00           C  
ATOM   1142  CG  GLU X  72     211.724 183.687 275.841  0.00  0.00           C  
ATOM   1143  CD  GLU X  72     212.390 183.331 277.223  0.00  0.00           C  
ATOM   1144  OE1 GLU X  72     212.457 184.148 278.193  0.00  0.00           O  
ATOM   1145  OE2 GLU X  72     212.874 182.199 277.410  0.00  0.00           O1-
ATOM   1146  H   GLU X  72     211.307 181.991 272.598  0.00  0.00           H  
ATOM   1147  HA  GLU X  72     212.489 181.183 275.306  0.00  0.00           H  
ATOM   1148  HB2 GLU X  72     210.041 182.835 274.654  0.00  0.00           H  
ATOM   1149  HB3 GLU X  72     210.344 182.018 276.245  0.00  0.00           H  
ATOM   1150  HG2 GLU X  72     212.559 183.745 275.143  0.00  0.00           H  
ATOM   1151  HG3 GLU X  72     211.135 184.603 275.805  0.00  0.00           H  
ATOM   1152  N   ARG X  73     211.090 179.358 275.751  0.00  0.00           N  
ATOM   1153  CA  ARG X  73     210.028 178.390 276.239  0.00  0.00           C  
ATOM   1154  C   ARG X  73     209.335 178.702 277.509  0.00  0.00           C  
ATOM   1155  O   ARG X  73     209.908 179.317 278.406  0.00  0.00           O  
ATOM   1156  CB  ARG X  73     210.593 177.032 276.097  0.00  0.00           C  
ATOM   1157  CG  ARG X  73     211.787 176.730 276.954  0.00  0.00           C  
ATOM   1158  CD  ARG X  73     212.193 175.291 276.682  0.00  0.00           C  
ATOM   1159  NE  ARG X  73     212.652 175.090 275.348  0.00  0.00           N  
ATOM   1160  CZ  ARG X  73     213.395 174.103 274.832  0.00  0.00           C  
ATOM   1161  NH1 ARG X  73     213.705 173.022 275.443  0.00  0.00           N1+
ATOM   1162  NH2 ARG X  73     213.759 174.273 273.649  0.00  0.00           N  
ATOM   1163  H   ARG X  73     211.832 179.624 276.382  0.00  0.00           H  
ATOM   1164  HA  ARG X  73     209.257 178.527 275.480  0.00  0.00           H  
ATOM   1165  HB2 ARG X  73     209.800 176.322 276.332  0.00  0.00           H  
ATOM   1166  HB3 ARG X  73     210.871 176.949 275.046  0.00  0.00           H  
ATOM   1167  HG2 ARG X  73     212.626 177.359 276.658  0.00  0.00           H  
ATOM   1168  HG3 ARG X  73     211.492 176.788 278.002  0.00  0.00           H  
ATOM   1169  HD2 ARG X  73     213.047 175.023 277.304  0.00  0.00           H  
ATOM   1170  HD3 ARG X  73     211.330 174.640 276.826  0.00  0.00           H  
ATOM   1171  HE  ARG X  73     212.400 175.783 274.658  0.00  0.00           H  
ATOM   1172 HH11 ARG X  73     213.326 172.845 276.363  0.00  0.00           H  
ATOM   1173 HH12 ARG X  73     214.311 172.361 274.979  0.00  0.00           H  
ATOM   1174 HH21 ARG X  73     213.649 175.174 273.205  0.00  0.00           H  
ATOM   1175 HH22 ARG X  73     214.365 173.522 273.352  0.00  0.00           H  
ATOM   1176  N   MET X  74     208.082 178.368 277.653  0.00  0.00           N  
ATOM   1177  CA  MET X  74     207.194 178.832 278.826  0.00  0.00           C  
ATOM   1178  C   MET X  74     206.216 177.721 279.213  0.00  0.00           C  
ATOM   1179  O   MET X  74     205.569 177.202 278.307  0.00  0.00           O  
ATOM   1180  CB  MET X  74     206.588 180.193 278.479  0.00  0.00           C  
ATOM   1181  CG  MET X  74     206.174 180.419 277.065  0.00  0.00           C  
ATOM   1182  SD  MET X  74     205.655 182.138 276.703  0.00  0.00           S  
ATOM   1183  CE  MET X  74     207.308 183.033 276.839  0.00  0.00           C  
ATOM   1184  H   MET X  74     207.662 177.918 276.852  0.00  0.00           H  
ATOM   1185  HA  MET X  74     207.859 178.986 279.676  0.00  0.00           H  
ATOM   1186  HB2 MET X  74     205.809 180.524 279.166  0.00  0.00           H  
ATOM   1187  HB3 MET X  74     207.395 180.897 278.685  0.00  0.00           H  
ATOM   1188  HG2 MET X  74     206.809 179.988 276.291  0.00  0.00           H  
ATOM   1189  HG3 MET X  74     205.270 179.850 276.848  0.00  0.00           H  
ATOM   1190  HE1 MET X  74     207.887 182.824 275.939  0.00  0.00           H  
ATOM   1191  HE2 MET X  74     207.067 184.096 276.847  0.00  0.00           H  
ATOM   1192  HE3 MET X  74     207.805 182.855 277.792  0.00  0.00           H  
ATOM   1193  N   VAL X  75     206.106 177.365 280.454  0.00  0.00           N  
ATOM   1194  CA  VAL X  75     205.414 176.239 281.027  0.00  0.00           C  
ATOM   1195  C   VAL X  75     204.160 176.703 281.781  0.00  0.00           C  
ATOM   1196  O   VAL X  75     204.123 177.243 282.895  0.00  0.00           O  
ATOM   1197  CB  VAL X  75     206.335 175.443 281.961  0.00  0.00           C  
ATOM   1198  CG1 VAL X  75     205.636 174.236 282.678  0.00  0.00           C  
ATOM   1199  CG2 VAL X  75     207.527 174.984 281.154  0.00  0.00           C  
ATOM   1200  H   VAL X  75     206.608 177.841 281.190  0.00  0.00           H  
ATOM   1201  HA  VAL X  75     205.134 175.517 280.259  0.00  0.00           H  
ATOM   1202  HB  VAL X  75     206.562 176.064 282.827  0.00  0.00           H  
ATOM   1203 HG11 VAL X  75     206.348 173.659 283.268  0.00  0.00           H  
ATOM   1204 HG12 VAL X  75     204.983 174.648 283.448  0.00  0.00           H  
ATOM   1205 HG13 VAL X  75     205.159 173.512 282.017  0.00  0.00           H  
ATOM   1206 HG21 VAL X  75     207.301 174.275 280.358  0.00  0.00           H  
ATOM   1207 HG22 VAL X  75     208.242 174.531 281.841  0.00  0.00           H  
ATOM   1208 HG23 VAL X  75     208.099 175.796 280.705  0.00  0.00           H  
ATOM   1209  N   VAL X  76     203.035 176.676 281.119  0.00  0.00           N  
ATOM   1210  CA  VAL X  76     201.695 177.104 281.610  0.00  0.00           C  
ATOM   1211  C   VAL X  76     201.117 175.938 282.375  0.00  0.00           C  
ATOM   1212  O   VAL X  76     201.023 174.821 281.829  0.00  0.00           O  
ATOM   1213  CB  VAL X  76     200.764 177.565 280.538  0.00  0.00           C  
ATOM   1214  CG1 VAL X  76     199.493 178.279 281.009  0.00  0.00           C  
ATOM   1215  CG2 VAL X  76     201.424 178.602 279.584  0.00  0.00           C  
ATOM   1216  H   VAL X  76     203.140 176.221 280.223  0.00  0.00           H  
ATOM   1217  HA  VAL X  76     201.732 178.003 282.225  0.00  0.00           H  
ATOM   1218  HB  VAL X  76     200.432 176.745 279.900  0.00  0.00           H  
ATOM   1219 HG11 VAL X  76     199.822 179.138 281.593  0.00  0.00           H  
ATOM   1220 HG12 VAL X  76     198.894 178.541 280.137  0.00  0.00           H  
ATOM   1221 HG13 VAL X  76     198.857 177.592 281.567  0.00  0.00           H  
ATOM   1222 HG21 VAL X  76     200.642 178.882 278.878  0.00  0.00           H  
ATOM   1223 HG22 VAL X  76     202.312 178.239 279.066  0.00  0.00           H  
ATOM   1224 HG23 VAL X  76     201.674 179.491 280.162  0.00  0.00           H  
ATOM   1225  N   LEU X  77     200.617 176.180 283.598  0.00  0.00           N  
ATOM   1226  CA  LEU X  77     199.970 175.140 284.439  0.00  0.00           C  
ATOM   1227  C   LEU X  77     198.431 175.453 284.687  0.00  0.00           C  
ATOM   1228  O   LEU X  77     198.106 176.523 285.179  0.00  0.00           O  
ATOM   1229  CB  LEU X  77     200.686 175.144 285.804  0.00  0.00           C  
ATOM   1230  CG  LEU X  77     202.148 174.783 285.795  0.00  0.00           C  
ATOM   1231  CD1 LEU X  77     202.803 174.754 287.210  0.00  0.00           C  
ATOM   1232  CD2 LEU X  77     202.472 173.438 285.198  0.00  0.00           C  
ATOM   1233  H   LEU X  77     200.594 177.129 283.943  0.00  0.00           H  
ATOM   1234  HA  LEU X  77     200.064 174.175 283.940  0.00  0.00           H  
ATOM   1235  HB2 LEU X  77     200.637 176.038 286.426  0.00  0.00           H  
ATOM   1236  HB3 LEU X  77     200.198 174.431 286.468  0.00  0.00           H  
ATOM   1237  HG  LEU X  77     202.660 175.514 285.170  0.00  0.00           H  
ATOM   1238 HD11 LEU X  77     202.627 175.762 287.585  0.00  0.00           H  
ATOM   1239 HD12 LEU X  77     203.865 174.545 287.077  0.00  0.00           H  
ATOM   1240 HD13 LEU X  77     202.376 173.954 287.815  0.00  0.00           H  
ATOM   1241 HD21 LEU X  77     203.528 173.172 285.232  0.00  0.00           H  
ATOM   1242 HD22 LEU X  77     201.939 172.693 285.789  0.00  0.00           H  
ATOM   1243 HD23 LEU X  77     202.060 173.374 284.191  0.00  0.00           H  
ATOM   1244  N   HIE X  78     197.550 174.488 284.437  0.00  0.00           N  
ATOM   1245  CA  HIE X  78     196.112 174.644 284.486  0.00  0.00           C  
ATOM   1246  C   HIE X  78     195.304 173.582 285.103  0.00  0.00           C  
ATOM   1247  O   HIE X  78     195.655 172.408 285.007  0.00  0.00           O  
ATOM   1248  CB  HIE X  78     195.684 174.853 283.011  0.00  0.00           C  
ATOM   1249  CG  HIE X  78     194.188 175.179 282.803  0.00  0.00           C  
ATOM   1250  CD2 HIE X  78     193.715 176.423 282.464  0.00  0.00           C  
ATOM   1251  ND1 HIE X  78     193.083 174.351 282.869  0.00  0.00           N  
ATOM   1252  CE1 HIE X  78     192.012 174.990 282.474  0.00  0.00           C  
ATOM   1253  NE2 HIE X  78     192.321 176.289 282.264  0.00  0.00           N  
ATOM   1254  H   HIE X  78     197.895 173.606 284.086  0.00  0.00           H  
ATOM   1255  HA  HIE X  78     195.882 175.583 284.990  0.00  0.00           H  
ATOM   1256  HB2 HIE X  78     196.316 175.604 282.538  0.00  0.00           H  
ATOM   1257  HB3 HIE X  78     195.939 173.926 282.498  0.00  0.00           H  
ATOM   1258  HD2 HIE X  78     194.365 177.284 282.415  0.00  0.00           H  
ATOM   1259  HE1 HIE X  78     190.998 174.617 282.492  0.00  0.00           H  
ATOM   1260  HE2 HIE X  78     191.674 177.050 282.119  0.00  0.00           H  
ATOM   1261  N   GLY X  79     194.272 174.021 285.839  0.00  0.00           N  
ATOM   1262  CA  GLY X  79     193.581 173.280 286.796  0.00  0.00           C  
ATOM   1263  C   GLY X  79     194.153 173.208 288.211  0.00  0.00           C  
ATOM   1264  O   GLY X  79     195.354 172.996 288.409  0.00  0.00           O  
ATOM   1265  H   GLY X  79     194.112 175.018 285.841  0.00  0.00           H  
ATOM   1266  HA2 GLY X  79     192.646 173.791 287.024  0.00  0.00           H  
ATOM   1267  HA3 GLY X  79     193.385 172.300 286.362  0.00  0.00           H  
ATOM   1268  N   TYR X  80     193.267 173.351 289.205  0.00  0.00           N  
ATOM   1269  CA  TYR X  80     193.641 173.353 290.608  0.00  0.00           C  
ATOM   1270  C   TYR X  80     194.538 172.211 290.999  0.00  0.00           C  
ATOM   1271  O   TYR X  80     195.409 172.419 291.806  0.00  0.00           O  
ATOM   1272  CB  TYR X  80     192.362 173.211 291.469  0.00  0.00           C  
ATOM   1273  CG  TYR X  80     192.731 173.040 292.955  0.00  0.00           C  
ATOM   1274  CD1 TYR X  80     193.190 174.111 293.773  0.00  0.00           C  
ATOM   1275  CD2 TYR X  80     192.703 171.739 293.498  0.00  0.00           C  
ATOM   1276  CE1 TYR X  80     193.591 173.913 295.087  0.00  0.00           C  
ATOM   1277  CE2 TYR X  80     192.896 171.675 294.927  0.00  0.00           C  
ATOM   1278  CZ  TYR X  80     193.350 172.718 295.729  0.00  0.00           C  
ATOM   1279  OH  TYR X  80     193.544 172.583 297.103  0.00  0.00           O  
ATOM   1280  H   TYR X  80     192.273 173.493 289.093  0.00  0.00           H  
ATOM   1281  HA  TYR X  80     194.171 174.271 290.864  0.00  0.00           H  
ATOM   1282  HB2 TYR X  80     191.742 174.105 291.408  0.00  0.00           H  
ATOM   1283  HB3 TYR X  80     191.797 172.361 291.087  0.00  0.00           H  
ATOM   1284  HD1 TYR X  80     193.326 175.107 293.380  0.00  0.00           H  
ATOM   1285  HD2 TYR X  80     192.657 170.868 292.862  0.00  0.00           H  
ATOM   1286  HE1 TYR X  80     193.895 174.823 295.582  0.00  0.00           H  
ATOM   1287  HE2 TYR X  80     192.812 170.676 295.328  0.00  0.00           H  
ATOM   1288  HH  TYR X  80     193.563 173.476 297.455  0.00  0.00           H  
ATOM   1289  N   GLU X  81     194.322 170.961 290.500  0.00  0.00           N  
ATOM   1290  CA  GLU X  81     195.098 169.773 291.018  0.00  0.00           C  
ATOM   1291  C   GLU X  81     196.621 169.928 290.725  0.00  0.00           C  
ATOM   1292  O   GLU X  81     197.416 169.533 291.554  0.00  0.00           O  
ATOM   1293  CB  GLU X  81     194.606 168.478 290.236  0.00  0.00           C  
ATOM   1294  CG  GLU X  81     195.292 167.160 290.766  0.00  0.00           C  
ATOM   1295  CD  GLU X  81     194.731 166.013 290.126  0.00  0.00           C  
ATOM   1296  OE1 GLU X  81     195.037 165.728 288.974  0.00  0.00           O  
ATOM   1297  OE2 GLU X  81     193.928 165.298 290.760  0.00  0.00           O1-
ATOM   1298  H   GLU X  81     193.648 170.794 289.766  0.00  0.00           H  
ATOM   1299  HA  GLU X  81     194.895 169.626 292.079  0.00  0.00           H  
ATOM   1300  HB2 GLU X  81     193.539 168.367 290.430  0.00  0.00           H  
ATOM   1301  HB3 GLU X  81     194.805 168.628 289.175  0.00  0.00           H  
ATOM   1302  HG2 GLU X  81     196.370 167.143 290.611  0.00  0.00           H  
ATOM   1303  HG3 GLU X  81     195.202 167.063 291.848  0.00  0.00           H  
ATOM   1304  N   VAL X  82     197.070 170.406 289.555  0.00  0.00           N  
ATOM   1305  CA  VAL X  82     198.474 170.724 289.212  0.00  0.00           C  
ATOM   1306  C   VAL X  82     198.996 172.023 289.780  0.00  0.00           C  
ATOM   1307  O   VAL X  82     200.159 172.059 290.184  0.00  0.00           O  
ATOM   1308  CB  VAL X  82     198.722 170.453 287.732  0.00  0.00           C  
ATOM   1309  CG1 VAL X  82     198.572 171.685 286.825  0.00  0.00           C  
ATOM   1310  CG2 VAL X  82     200.065 169.892 287.305  0.00  0.00           C  
ATOM   1311  H   VAL X  82     196.365 170.301 288.839  0.00  0.00           H  
ATOM   1312  HA  VAL X  82     199.088 170.002 289.748  0.00  0.00           H  
ATOM   1313  HB  VAL X  82     198.026 169.675 287.420  0.00  0.00           H  
ATOM   1314 HG11 VAL X  82     199.421 172.325 287.067  0.00  0.00           H  
ATOM   1315 HG12 VAL X  82     198.684 171.398 285.779  0.00  0.00           H  
ATOM   1316 HG13 VAL X  82     197.619 172.204 286.923  0.00  0.00           H  
ATOM   1317 HG21 VAL X  82     200.893 170.599 287.328  0.00  0.00           H  
ATOM   1318 HG22 VAL X  82     200.077 169.599 286.254  0.00  0.00           H  
ATOM   1319 HG23 VAL X  82     200.432 169.150 288.014  0.00  0.00           H  
ATOM   1320  N   VAL X  83     198.063 172.961 289.862  0.00  0.00           N  
ATOM   1321  CA  VAL X  83     198.282 174.181 290.613  0.00  0.00           C  
ATOM   1322  C   VAL X  83     198.763 173.919 292.013  0.00  0.00           C  
ATOM   1323  O   VAL X  83     199.546 174.644 292.526  0.00  0.00           O  
ATOM   1324  CB  VAL X  83     197.064 175.189 290.487  0.00  0.00           C  
ATOM   1325  CG1 VAL X  83     196.979 176.387 291.453  0.00  0.00           C  
ATOM   1326  CG2 VAL X  83     196.895 175.698 289.022  0.00  0.00           C  
ATOM   1327  H   VAL X  83     197.123 172.767 289.548  0.00  0.00           H  
ATOM   1328  HA  VAL X  83     199.088 174.669 290.066  0.00  0.00           H  
ATOM   1329  HB  VAL X  83     196.190 174.609 290.783  0.00  0.00           H  
ATOM   1330 HG11 VAL X  83     197.389 176.184 292.443  0.00  0.00           H  
ATOM   1331 HG12 VAL X  83     197.593 177.250 291.195  0.00  0.00           H  
ATOM   1332 HG13 VAL X  83     195.959 176.637 291.746  0.00  0.00           H  
ATOM   1333 HG21 VAL X  83     197.732 176.381 288.876  0.00  0.00           H  
ATOM   1334 HG22 VAL X  83     195.884 176.090 288.910  0.00  0.00           H  
ATOM   1335 HG23 VAL X  83     197.097 174.946 288.259  0.00  0.00           H  
ATOM   1336  N   LYS X  84     198.180 172.975 292.697  0.00  0.00           N  
ATOM   1337  CA  LYS X  84     198.656 172.567 293.956  0.00  0.00           C  
ATOM   1338  C   LYS X  84     199.908 171.704 293.838  0.00  0.00           C  
ATOM   1339  O   LYS X  84     200.800 171.890 294.722  0.00  0.00           O  
ATOM   1340  CB  LYS X  84     197.460 171.764 294.653  0.00  0.00           C  
ATOM   1341  CG  LYS X  84     197.882 171.307 296.101  0.00  0.00           C  
ATOM   1342  CD  LYS X  84     196.775 170.453 296.736  0.00  0.00           C  
ATOM   1343  CE  LYS X  84     197.229 170.125 298.121  0.00  0.00           C  
ATOM   1344  NZ  LYS X  84     198.391 169.112 298.225  0.00  0.00           N1+
ATOM   1345  H   LYS X  84     197.467 172.414 292.252  0.00  0.00           H  
ATOM   1346  HA  LYS X  84     199.020 173.405 294.551  0.00  0.00           H  
ATOM   1347  HB2 LYS X  84     196.576 172.384 294.801  0.00  0.00           H  
ATOM   1348  HB3 LYS X  84     197.164 170.849 294.140  0.00  0.00           H  
ATOM   1349  HG2 LYS X  84     198.730 170.622 296.069  0.00  0.00           H  
ATOM   1350  HG3 LYS X  84     198.146 172.217 296.641  0.00  0.00           H  
ATOM   1351  HD2 LYS X  84     195.869 171.056 296.791  0.00  0.00           H  
ATOM   1352  HD3 LYS X  84     196.579 169.578 296.116  0.00  0.00           H  
ATOM   1353  HE2 LYS X  84     197.549 170.960 298.744  0.00  0.00           H  
ATOM   1354  HE3 LYS X  84     196.456 169.657 298.731  0.00  0.00           H  
ATOM   1355  HZ1 LYS X  84     199.249 169.413 297.787  0.00  0.00           H  
ATOM   1356  HZ2 LYS X  84     198.158 168.190 297.883  0.00  0.00           H  
ATOM   1357  HZ3 LYS X  84     198.575 169.013 299.214  0.00  0.00           H  
ATOM   1358  N   GLU X  85     199.992 170.777 292.895  0.00  0.00           N  
ATOM   1359  CA  GLU X  85     201.180 169.865 292.913  0.00  0.00           C  
ATOM   1360  C   GLU X  85     202.568 170.588 292.655  0.00  0.00           C  
ATOM   1361  O   GLU X  85     203.548 170.206 293.342  0.00  0.00           O  
ATOM   1362  CB  GLU X  85     200.852 168.715 291.991  0.00  0.00           C  
ATOM   1363  CG  GLU X  85     201.978 167.627 291.898  0.00  0.00           C  
ATOM   1364  CD  GLU X  85     201.667 166.425 290.981  0.00  0.00           C  
ATOM   1365  OE1 GLU X  85     200.570 165.802 291.137  0.00  0.00           O  
ATOM   1366  OE2 GLU X  85     202.395 165.966 290.055  0.00  0.00           O1-
ATOM   1367  H   GLU X  85     199.137 170.509 292.430  0.00  0.00           H  
ATOM   1368  HA  GLU X  85     201.207 169.550 293.956  0.00  0.00           H  
ATOM   1369  HB2 GLU X  85     199.939 168.192 292.276  0.00  0.00           H  
ATOM   1370  HB3 GLU X  85     200.712 169.041 290.960  0.00  0.00           H  
ATOM   1371  HG2 GLU X  85     202.870 168.196 291.638  0.00  0.00           H  
ATOM   1372  HG3 GLU X  85     202.238 167.192 292.863  0.00  0.00           H  
ATOM   1373  N   ALA X  86     202.669 171.628 291.801  0.00  0.00           N  
ATOM   1374  CA  ALA X  86     203.838 172.538 291.662  0.00  0.00           C  
ATOM   1375  C   ALA X  86     203.976 173.623 292.787  0.00  0.00           C  
ATOM   1376  O   ALA X  86     204.897 173.694 293.637  0.00  0.00           O  
ATOM   1377  CB  ALA X  86     203.739 173.107 290.243  0.00  0.00           C  
ATOM   1378  H   ALA X  86     201.866 171.797 291.212  0.00  0.00           H  
ATOM   1379  HA  ALA X  86     204.778 171.986 291.668  0.00  0.00           H  
ATOM   1380  HB1 ALA X  86     202.862 173.718 290.029  0.00  0.00           H  
ATOM   1381  HB2 ALA X  86     203.763 172.370 289.440  0.00  0.00           H  
ATOM   1382  HB3 ALA X  86     204.524 173.848 290.094  0.00  0.00           H  
ATOM   1383  N   LEU X  87     203.007 174.553 292.858  0.00  0.00           N  
ATOM   1384  CA  LEU X  87     203.211 175.864 293.580  0.00  0.00           C  
ATOM   1385  C   LEU X  87     203.075 175.804 295.128  0.00  0.00           C  
ATOM   1386  O   LEU X  87     203.622 176.627 295.847  0.00  0.00           O  
ATOM   1387  CB  LEU X  87     202.196 176.924 293.084  0.00  0.00           C  
ATOM   1388  CG  LEU X  87     202.021 178.359 293.655  0.00  0.00           C  
ATOM   1389  CD1 LEU X  87     203.382 179.084 293.566  0.00  0.00           C  
ATOM   1390  CD2 LEU X  87     201.072 179.196 292.856  0.00  0.00           C  
ATOM   1391  H   LEU X  87     202.213 174.522 292.234  0.00  0.00           H  
ATOM   1392  HA  LEU X  87     204.210 176.296 293.510  0.00  0.00           H  
ATOM   1393  HB2 LEU X  87     202.371 176.953 292.009  0.00  0.00           H  
ATOM   1394  HB3 LEU X  87     201.220 176.457 293.216  0.00  0.00           H  
ATOM   1395  HG  LEU X  87     201.673 178.350 294.688  0.00  0.00           H  
ATOM   1396 HD11 LEU X  87     204.237 178.572 294.007  0.00  0.00           H  
ATOM   1397 HD12 LEU X  87     203.323 180.092 293.977  0.00  0.00           H  
ATOM   1398 HD13 LEU X  87     203.619 179.138 292.503  0.00  0.00           H  
ATOM   1399 HD21 LEU X  87     201.145 180.273 293.003  0.00  0.00           H  
ATOM   1400 HD22 LEU X  87     201.435 179.075 291.835  0.00  0.00           H  
ATOM   1401 HD23 LEU X  87     200.112 178.769 293.144  0.00  0.00           H  
ATOM   1402  N   ILE X  88     202.362 174.781 295.656  0.00  0.00           N  
ATOM   1403  CA  ILE X  88     202.210 174.465 297.056  0.00  0.00           C  
ATOM   1404  C   ILE X  88     203.171 173.288 297.383  0.00  0.00           C  
ATOM   1405  O   ILE X  88     203.981 173.292 298.335  0.00  0.00           O  
ATOM   1406  CB  ILE X  88     200.698 174.245 297.392  0.00  0.00           C  
ATOM   1407  CG1 ILE X  88     199.888 175.428 296.911  0.00  0.00           C  
ATOM   1408  CG2 ILE X  88     200.476 173.900 298.872  0.00  0.00           C  
ATOM   1409  CD1 ILE X  88     198.397 175.549 297.110  0.00  0.00           C  
ATOM   1410  H   ILE X  88     201.813 174.251 294.995  0.00  0.00           H  
ATOM   1411  HA  ILE X  88     202.606 175.280 297.662  0.00  0.00           H  
ATOM   1412  HB  ILE X  88     200.466 173.337 296.835  0.00  0.00           H  
ATOM   1413 HG12 ILE X  88     200.257 176.353 297.355  0.00  0.00           H  
ATOM   1414 HG13 ILE X  88     200.052 175.449 295.834  0.00  0.00           H  
ATOM   1415 HG21 ILE X  88     201.093 173.013 299.009  0.00  0.00           H  
ATOM   1416 HG22 ILE X  88     199.417 173.698 299.035  0.00  0.00           H  
ATOM   1417 HG23 ILE X  88     200.829 174.724 299.492  0.00  0.00           H  
ATOM   1418 HD11 ILE X  88     198.060 175.618 298.144  0.00  0.00           H  
ATOM   1419 HD12 ILE X  88     197.986 174.642 296.666  0.00  0.00           H  
ATOM   1420 HD13 ILE X  88     198.012 176.451 296.635  0.00  0.00           H  
ATOM   1421  N   ASP X  89     202.993 172.145 296.693  0.00  0.00           N  
ATOM   1422  CA  ASP X  89     203.709 170.945 297.149  0.00  0.00           C  
ATOM   1423  C   ASP X  89     205.161 170.899 296.826  0.00  0.00           C  
ATOM   1424  O   ASP X  89     205.936 170.160 297.449  0.00  0.00           O  
ATOM   1425  CB  ASP X  89     203.077 169.626 296.747  0.00  0.00           C  
ATOM   1426  CG  ASP X  89     201.621 169.290 297.060  0.00  0.00           C  
ATOM   1427  OD1 ASP X  89     200.957 170.124 297.717  0.00  0.00           O  
ATOM   1428  OD2 ASP X  89     201.048 168.212 296.701  0.00  0.00           O1-
ATOM   1429  H   ASP X  89     202.304 171.983 295.973  0.00  0.00           H  
ATOM   1430  HA  ASP X  89     203.722 170.876 298.237  0.00  0.00           H  
ATOM   1431  HB2 ASP X  89     203.080 169.587 295.657  0.00  0.00           H  
ATOM   1432  HB3 ASP X  89     203.636 168.769 297.124  0.00  0.00           H  
ATOM   1433  N   LEU X  90     205.656 171.767 295.916  0.00  0.00           N  
ATOM   1434  CA  LEU X  90     207.110 171.877 295.648  0.00  0.00           C  
ATOM   1435  C   LEU X  90     207.526 173.368 295.677  0.00  0.00           C  
ATOM   1436  O   LEU X  90     208.431 173.661 294.941  0.00  0.00           O  
ATOM   1437  CB  LEU X  90     207.335 171.016 294.314  0.00  0.00           C  
ATOM   1438  CG  LEU X  90     208.784 170.442 294.075  0.00  0.00           C  
ATOM   1439  CD1 LEU X  90     209.163 169.443 295.207  0.00  0.00           C  
ATOM   1440  CD2 LEU X  90     208.843 169.772 292.684  0.00  0.00           C  
ATOM   1441  H   LEU X  90     205.074 172.346 295.328  0.00  0.00           H  
ATOM   1442  HA  LEU X  90     207.735 171.419 296.415  0.00  0.00           H  
ATOM   1443  HB2 LEU X  90     206.732 170.108 294.347  0.00  0.00           H  
ATOM   1444  HB3 LEU X  90     207.103 171.638 293.450  0.00  0.00           H  
ATOM   1445  HG  LEU X  90     209.464 171.290 294.158  0.00  0.00           H  
ATOM   1446 HD11 LEU X  90     210.086 168.951 294.899  0.00  0.00           H  
ATOM   1447 HD12 LEU X  90     208.403 168.692 295.418  0.00  0.00           H  
ATOM   1448 HD13 LEU X  90     209.359 170.006 296.120  0.00  0.00           H  
ATOM   1449 HD21 LEU X  90     208.803 170.471 291.849  0.00  0.00           H  
ATOM   1450 HD22 LEU X  90     209.811 169.277 292.614  0.00  0.00           H  
ATOM   1451 HD23 LEU X  90     208.031 169.063 292.524  0.00  0.00           H  
ATOM   1452  N   GLY X  91     206.838 174.240 296.467  0.00  0.00           N  
ATOM   1453  CA  GLY X  91     206.721 175.697 296.269  0.00  0.00           C  
ATOM   1454  C   GLY X  91     207.961 176.502 296.561  0.00  0.00           C  
ATOM   1455  O   GLY X  91     208.098 177.739 296.260  0.00  0.00           O  
ATOM   1456  H   GLY X  91     206.168 173.848 297.113  0.00  0.00           H  
ATOM   1457  HA2 GLY X  91     206.277 175.920 295.299  0.00  0.00           H  
ATOM   1458  HA3 GLY X  91     206.024 176.058 297.024  0.00  0.00           H  
ATOM   1459  N   GLU X  92     209.002 175.861 297.080  0.00  0.00           N  
ATOM   1460  CA  GLU X  92     210.352 176.429 297.294  0.00  0.00           C  
ATOM   1461  C   GLU X  92     211.024 176.480 295.960  0.00  0.00           C  
ATOM   1462  O   GLU X  92     211.679 177.456 295.604  0.00  0.00           O  
ATOM   1463  CB  GLU X  92     211.163 175.591 298.324  0.00  0.00           C  
ATOM   1464  CG  GLU X  92     212.595 176.113 298.579  0.00  0.00           C  
ATOM   1465  CD  GLU X  92     212.636 177.278 299.579  0.00  0.00           C  
ATOM   1466  OE1 GLU X  92     211.731 178.128 299.828  0.00  0.00           O  
ATOM   1467  OE2 GLU X  92     213.712 177.442 300.209  0.00  0.00           O1-
ATOM   1468  H   GLU X  92     208.900 174.948 297.501  0.00  0.00           H  
ATOM   1469  HA  GLU X  92     210.229 177.451 297.653  0.00  0.00           H  
ATOM   1470  HB2 GLU X  92     210.577 175.426 299.229  0.00  0.00           H  
ATOM   1471  HB3 GLU X  92     211.238 174.552 298.003  0.00  0.00           H  
ATOM   1472  HG2 GLU X  92     213.276 175.295 298.818  0.00  0.00           H  
ATOM   1473  HG3 GLU X  92     213.066 176.302 297.615  0.00  0.00           H  
ATOM   1474  N   GLU X  93     210.909 175.408 295.154  0.00  0.00           N  
ATOM   1475  CA  GLU X  93     211.680 175.251 293.943  0.00  0.00           C  
ATOM   1476  C   GLU X  93     211.189 176.263 292.878  0.00  0.00           C  
ATOM   1477  O   GLU X  93     211.951 177.031 292.273  0.00  0.00           O  
ATOM   1478  CB  GLU X  93     211.542 173.723 293.575  0.00  0.00           C  
ATOM   1479  CG  GLU X  93     212.428 173.368 292.384  0.00  0.00           C  
ATOM   1480  CD  GLU X  93     213.934 173.383 292.696  0.00  0.00           C  
ATOM   1481  OE1 GLU X  93     214.531 174.483 292.699  0.00  0.00           O  
ATOM   1482  OE2 GLU X  93     214.384 172.259 293.045  0.00  0.00           O1-
ATOM   1483  H   GLU X  93     210.266 174.666 295.393  0.00  0.00           H  
ATOM   1484  HA  GLU X  93     212.687 175.458 294.306  0.00  0.00           H  
ATOM   1485  HB2 GLU X  93     211.792 173.169 294.480  0.00  0.00           H  
ATOM   1486  HB3 GLU X  93     210.553 173.404 293.245  0.00  0.00           H  
ATOM   1487  HG2 GLU X  93     212.112 172.380 292.049  0.00  0.00           H  
ATOM   1488  HG3 GLU X  93     212.177 174.050 291.571  0.00  0.00           H  
ATOM   1489  N   PHE X  94     209.862 176.219 292.710  0.00  0.00           N  
ATOM   1490  CA  PHE X  94     209.138 177.283 291.876  0.00  0.00           C  
ATOM   1491  C   PHE X  94     209.201 178.709 292.463  0.00  0.00           C  
ATOM   1492  O   PHE X  94     208.511 179.559 291.983  0.00  0.00           O  
ATOM   1493  CB  PHE X  94     207.660 176.691 291.506  0.00  0.00           C  
ATOM   1494  CG  PHE X  94     207.651 175.378 290.800  0.00  0.00           C  
ATOM   1495  CD1 PHE X  94     207.724 175.422 289.371  0.00  0.00           C  
ATOM   1496  CD2 PHE X  94     207.572 174.110 291.389  0.00  0.00           C  
ATOM   1497  CE1 PHE X  94     207.695 174.230 288.533  0.00  0.00           C  
ATOM   1498  CE2 PHE X  94     207.489 172.935 290.599  0.00  0.00           C  
ATOM   1499  CZ  PHE X  94     207.637 172.962 289.190  0.00  0.00           C  
ATOM   1500  H   PHE X  94     209.310 175.463 293.090  0.00  0.00           H  
ATOM   1501  HA  PHE X  94     209.706 177.425 290.957  0.00  0.00           H  
ATOM   1502  HB2 PHE X  94     207.112 176.568 292.440  0.00  0.00           H  
ATOM   1503  HB3 PHE X  94     207.046 177.379 290.924  0.00  0.00           H  
ATOM   1504  HD1 PHE X  94     207.701 176.444 289.022  0.00  0.00           H  
ATOM   1505  HD2 PHE X  94     207.428 174.116 292.460  0.00  0.00           H  
ATOM   1506  HE1 PHE X  94     207.691 174.233 287.453  0.00  0.00           H  
ATOM   1507  HE2 PHE X  94     207.222 171.967 290.996  0.00  0.00           H  
ATOM   1508  HZ  PHE X  94     207.735 171.996 288.719  0.00  0.00           H  
ATOM   1509  N   SER X  95     210.153 179.107 293.367  0.00  0.00           N  
ATOM   1510  CA  SER X  95     210.215 180.528 293.900  0.00  0.00           C  
ATOM   1511  C   SER X  95     211.085 181.438 292.967  0.00  0.00           C  
ATOM   1512  O   SER X  95     211.146 182.617 293.277  0.00  0.00           O  
ATOM   1513  CB  SER X  95     210.620 180.526 295.331  0.00  0.00           C  
ATOM   1514  OG  SER X  95     209.550 180.039 296.135  0.00  0.00           O  
ATOM   1515  H   SER X  95     210.695 178.392 293.829  0.00  0.00           H  
ATOM   1516  HA  SER X  95     209.219 180.957 293.784  0.00  0.00           H  
ATOM   1517  HB2 SER X  95     211.490 179.907 295.550  0.00  0.00           H  
ATOM   1518  HB3 SER X  95     210.793 181.562 295.622  0.00  0.00           H  
ATOM   1519  HG  SER X  95     209.366 179.126 295.900  0.00  0.00           H  
ATOM   1520  N   GLY X  96     211.706 180.861 291.930  0.00  0.00           N  
ATOM   1521  CA  GLY X  96     212.511 181.754 291.087  0.00  0.00           C  
ATOM   1522  C   GLY X  96     211.534 182.675 290.336  0.00  0.00           C  
ATOM   1523  O   GLY X  96     210.405 182.302 289.956  0.00  0.00           O  
ATOM   1524  H   GLY X  96     211.348 180.040 291.464  0.00  0.00           H  
ATOM   1525  HA2 GLY X  96     213.358 182.273 291.535  0.00  0.00           H  
ATOM   1526  HA3 GLY X  96     212.981 181.252 290.241  0.00  0.00           H  
ATOM   1527  N   ARG X  97     211.907 183.964 289.996  0.00  0.00           N  
ATOM   1528  CA  ARG X  97     211.076 184.630 288.998  0.00  0.00           C  
ATOM   1529  C   ARG X  97     211.425 184.318 287.510  0.00  0.00           C  
ATOM   1530  O   ARG X  97     212.674 184.253 287.263  0.00  0.00           O  
ATOM   1531  CB  ARG X  97     211.222 186.163 289.070  0.00  0.00           C  
ATOM   1532  CG  ARG X  97     210.343 186.752 290.244  0.00  0.00           C  
ATOM   1533  CD  ARG X  97     209.079 187.391 289.694  0.00  0.00           C  
ATOM   1534  NE  ARG X  97     208.123 187.730 290.827  0.00  0.00           N  
ATOM   1535  CZ  ARG X  97     206.959 187.152 291.163  0.00  0.00           C  
ATOM   1536  NH1 ARG X  97     206.406 186.175 290.467  0.00  0.00           N1+
ATOM   1537  NH2 ARG X  97     206.238 187.651 292.118  0.00  0.00           N  
ATOM   1538  H   ARG X  97     212.847 184.276 290.191  0.00  0.00           H  
ATOM   1539  HA  ARG X  97     210.043 184.318 289.149  0.00  0.00           H  
ATOM   1540  HB2 ARG X  97     212.230 186.572 289.145  0.00  0.00           H  
ATOM   1541  HB3 ARG X  97     210.803 186.697 288.217  0.00  0.00           H  
ATOM   1542  HG2 ARG X  97     209.979 185.923 290.852  0.00  0.00           H  
ATOM   1543  HG3 ARG X  97     210.961 187.432 290.830  0.00  0.00           H  
ATOM   1544  HD2 ARG X  97     209.226 188.225 289.008  0.00  0.00           H  
ATOM   1545  HD3 ARG X  97     208.594 186.626 289.089  0.00  0.00           H  
ATOM   1546  HE  ARG X  97     208.328 188.646 291.199  0.00  0.00           H  
ATOM   1547 HH11 ARG X  97     206.921 185.821 289.673  0.00  0.00           H  
ATOM   1548 HH12 ARG X  97     205.477 185.870 290.720  0.00  0.00           H  
ATOM   1549 HH21 ARG X  97     206.646 188.270 292.804  0.00  0.00           H  
ATOM   1550 HH22 ARG X  97     205.258 187.443 292.249  0.00  0.00           H  
ATOM   1551  N   GLY X  98     210.461 184.290 286.635  0.00  0.00           N  
ATOM   1552  CA  GLY X  98     210.756 184.474 285.208  0.00  0.00           C  
ATOM   1553  C   GLY X  98     211.194 185.880 284.801  0.00  0.00           C  
ATOM   1554  O   GLY X  98     210.984 186.793 285.662  0.00  0.00           O  
ATOM   1555  H   GLY X  98     209.508 184.173 286.947  0.00  0.00           H  
ATOM   1556  HA2 GLY X  98     211.601 183.819 284.995  0.00  0.00           H  
ATOM   1557  HA3 GLY X  98     210.011 184.089 284.512  0.00  0.00           H  
ATOM   1558  N   HIE X  99     211.831 185.979 283.682  0.00  0.00           N  
ATOM   1559  CA  HIE X  99     212.891 186.978 283.449  0.00  0.00           C  
ATOM   1560  C   HIE X  99     212.278 188.310 282.970  0.00  0.00           C  
ATOM   1561  O   HIE X  99     211.234 188.138 282.382  0.00  0.00           O  
ATOM   1562  CB  HIE X  99     213.859 186.497 282.428  0.00  0.00           C  
ATOM   1563  CG  HIE X  99     215.050 187.427 282.150  0.00  0.00           C  
ATOM   1564  CD2 HIE X  99     215.458 188.048 281.050  0.00  0.00           C  
ATOM   1565  ND1 HIE X  99     215.805 187.960 283.143  0.00  0.00           N  
ATOM   1566  CE1 HIE X  99     216.659 188.857 282.665  0.00  0.00           C  
ATOM   1567  NE2 HIE X  99     216.428 189.044 281.379  0.00  0.00           N  
ATOM   1568  H   HIE X  99     211.947 185.061 283.278  0.00  0.00           H  
ATOM   1569  HA  HIE X  99     213.292 187.153 284.447  0.00  0.00           H  
ATOM   1570  HB2 HIE X  99     214.296 185.535 282.693  0.00  0.00           H  
ATOM   1571  HB3 HIE X  99     213.313 186.372 281.492  0.00  0.00           H  
ATOM   1572  HD2 HIE X  99     214.984 187.952 280.084  0.00  0.00           H  
ATOM   1573  HE1 HIE X  99     217.358 189.400 283.284  0.00  0.00           H  
ATOM   1574  HE2 HIE X  99     216.823 189.753 280.778  0.00  0.00           H  
ATOM   1575  N   PHE X 100     212.971 189.411 283.177  0.00  0.00           N  
ATOM   1576  CA  PHE X 100     212.577 190.827 282.875  0.00  0.00           C  
ATOM   1577  C   PHE X 100     213.763 191.725 282.528  0.00  0.00           C  
ATOM   1578  O   PHE X 100     214.683 191.922 283.374  0.00  0.00           O  
ATOM   1579  CB  PHE X 100     211.801 191.484 284.093  0.00  0.00           C  
ATOM   1580  CG  PHE X 100     210.407 190.854 284.234  0.00  0.00           C  
ATOM   1581  CD1 PHE X 100     210.145 190.066 285.366  0.00  0.00           C  
ATOM   1582  CD2 PHE X 100     209.377 191.291 283.393  0.00  0.00           C  
ATOM   1583  CE1 PHE X 100     208.830 189.786 285.675  0.00  0.00           C  
ATOM   1584  CE2 PHE X 100     208.034 190.978 283.619  0.00  0.00           C  
ATOM   1585  CZ  PHE X 100     207.792 190.213 284.797  0.00  0.00           C  
ATOM   1586  H   PHE X 100     213.896 189.235 283.544  0.00  0.00           H  
ATOM   1587  HA  PHE X 100     211.937 190.637 282.013  0.00  0.00           H  
ATOM   1588  HB2 PHE X 100     212.438 191.432 284.975  0.00  0.00           H  
ATOM   1589  HB3 PHE X 100     211.684 192.555 283.931  0.00  0.00           H  
ATOM   1590  HD1 PHE X 100     210.929 189.776 286.050  0.00  0.00           H  
ATOM   1591  HD2 PHE X 100     209.578 191.916 282.535  0.00  0.00           H  
ATOM   1592  HE1 PHE X 100     208.627 189.262 286.596  0.00  0.00           H  
ATOM   1593  HE2 PHE X 100     207.307 191.385 282.932  0.00  0.00           H  
ATOM   1594  HZ  PHE X 100     206.744 190.123 285.043  0.00  0.00           H  
ATOM   1595  N   PRO X 101     213.824 192.275 281.336  0.00  0.00           N  
ATOM   1596  CA  PRO X 101     214.989 193.003 280.792  0.00  0.00           C  
ATOM   1597  C   PRO X 101     215.319 194.241 281.653  0.00  0.00           C  
ATOM   1598  O   PRO X 101     216.400 194.219 282.220  0.00  0.00           O  
ATOM   1599  CB  PRO X 101     214.584 193.438 279.393  0.00  0.00           C  
ATOM   1600  CG  PRO X 101     213.047 193.469 279.367  0.00  0.00           C  
ATOM   1601  CD  PRO X 101     212.700 192.338 280.341  0.00  0.00           C  
ATOM   1602  HA  PRO X 101     215.854 192.348 280.696  0.00  0.00           H  
ATOM   1603  HB2 PRO X 101     214.901 194.465 279.212  0.00  0.00           H  
ATOM   1604  HB3 PRO X 101     215.013 192.814 278.609  0.00  0.00           H  
ATOM   1605  HG2 PRO X 101     212.617 194.374 279.795  0.00  0.00           H  
ATOM   1606  HG3 PRO X 101     212.572 193.170 278.433  0.00  0.00           H  
ATOM   1607  HD2 PRO X 101     211.720 192.468 280.801  0.00  0.00           H  
ATOM   1608  HD3 PRO X 101     212.803 191.460 279.704  0.00  0.00           H  
ATOM   1609  N   LEU X 102     214.349 195.102 281.976  0.00  0.00           N  
ATOM   1610  CA  LEU X 102     214.623 196.357 282.637  0.00  0.00           C  
ATOM   1611  C   LEU X 102     215.000 196.139 284.086  0.00  0.00           C  
ATOM   1612  O   LEU X 102     215.916 196.752 284.541  0.00  0.00           O  
ATOM   1613  CB  LEU X 102     213.480 197.362 282.488  0.00  0.00           C  
ATOM   1614  CG  LEU X 102     213.149 197.836 281.093  0.00  0.00           C  
ATOM   1615  CD1 LEU X 102     211.683 198.387 281.028  0.00  0.00           C  
ATOM   1616  CD2 LEU X 102     214.080 198.864 280.413  0.00  0.00           C  
ATOM   1617  H   LEU X 102     213.430 194.923 281.598  0.00  0.00           H  
ATOM   1618  HA  LEU X 102     215.530 196.765 282.191  0.00  0.00           H  
ATOM   1619  HB2 LEU X 102     212.616 197.023 283.060  0.00  0.00           H  
ATOM   1620  HB3 LEU X 102     213.866 198.289 282.913  0.00  0.00           H  
ATOM   1621  HG  LEU X 102     213.203 196.965 280.439  0.00  0.00           H  
ATOM   1622 HD11 LEU X 102     210.932 197.725 281.459  0.00  0.00           H  
ATOM   1623 HD12 LEU X 102     211.304 198.534 280.016  0.00  0.00           H  
ATOM   1624 HD13 LEU X 102     211.662 199.303 281.618  0.00  0.00           H  
ATOM   1625 HD21 LEU X 102     214.081 199.895 280.768  0.00  0.00           H  
ATOM   1626 HD22 LEU X 102     215.077 198.427 280.464  0.00  0.00           H  
ATOM   1627 HD23 LEU X 102     213.893 198.919 279.341  0.00  0.00           H  
ATOM   1628  N   ALA X 103     214.311 195.258 284.829  0.00  0.00           N  
ATOM   1629  CA  ALA X 103     214.528 195.042 286.247  0.00  0.00           C  
ATOM   1630  C   ALA X 103     215.910 194.406 286.481  0.00  0.00           C  
ATOM   1631  O   ALA X 103     216.391 194.632 287.558  0.00  0.00           O  
ATOM   1632  CB  ALA X 103     213.323 194.151 286.749  0.00  0.00           C  
ATOM   1633  H   ALA X 103     213.458 194.863 284.459  0.00  0.00           H  
ATOM   1634  HA  ALA X 103     214.470 195.992 286.780  0.00  0.00           H  
ATOM   1635  HB1 ALA X 103     213.425 194.123 287.834  0.00  0.00           H  
ATOM   1636  HB2 ALA X 103     213.355 193.133 286.361  0.00  0.00           H  
ATOM   1637  HB3 ALA X 103     212.408 194.633 286.406  0.00  0.00           H  
ATOM   1638  N   GLU X 104     216.489 193.563 285.552  0.00  0.00           N  
ATOM   1639  CA  GLU X 104     217.908 193.107 285.454  0.00  0.00           C  
ATOM   1640  C   GLU X 104     218.939 194.243 285.362  0.00  0.00           C  
ATOM   1641  O   GLU X 104     220.017 194.066 285.900  0.00  0.00           O  
ATOM   1642  CB  GLU X 104     218.084 192.104 284.319  0.00  0.00           C  
ATOM   1643  CG  GLU X 104     219.486 191.565 284.212  0.00  0.00           C  
ATOM   1644  CD  GLU X 104     219.923 190.798 285.447  0.00  0.00           C  
ATOM   1645  OE1 GLU X 104     219.036 190.443 286.257  0.00  0.00           O  
ATOM   1646  OE2 GLU X 104     221.135 190.441 285.577  0.00  0.00           O1-
ATOM   1647  H   GLU X 104     215.927 193.509 284.714  0.00  0.00           H  
ATOM   1648  HA  GLU X 104     217.975 192.578 286.405  0.00  0.00           H  
ATOM   1649  HB2 GLU X 104     217.386 191.271 284.393  0.00  0.00           H  
ATOM   1650  HB3 GLU X 104     217.897 192.640 283.388  0.00  0.00           H  
ATOM   1651  HG2 GLU X 104     219.407 190.908 283.346  0.00  0.00           H  
ATOM   1652  HG3 GLU X 104     220.163 192.373 283.935  0.00  0.00           H  
ATOM   1653  N   ARG X 105     218.603 195.371 284.729  0.00  0.00           N  
ATOM   1654  CA  ARG X 105     219.487 196.597 284.716  0.00  0.00           C  
ATOM   1655  C   ARG X 105     219.298 197.541 285.943  0.00  0.00           C  
ATOM   1656  O   ARG X 105     220.249 198.006 286.582  0.00  0.00           O  
ATOM   1657  CB  ARG X 105     219.448 197.311 283.322  0.00  0.00           C  
ATOM   1658  CG  ARG X 105     219.840 196.309 282.210  0.00  0.00           C  
ATOM   1659  CD  ARG X 105     219.828 196.903 280.758  0.00  0.00           C  
ATOM   1660  NE  ARG X 105     220.328 195.884 279.827  0.00  0.00           N  
ATOM   1661  CZ  ARG X 105     221.227 196.030 278.833  0.00  0.00           C  
ATOM   1662  NH1 ARG X 105     221.844 197.201 278.574  0.00  0.00           N1+
ATOM   1663  NH2 ARG X 105     221.582 194.972 278.107  0.00  0.00           N  
ATOM   1664  H   ARG X 105     217.653 195.510 284.415  0.00  0.00           H  
ATOM   1665  HA  ARG X 105     220.534 196.308 284.805  0.00  0.00           H  
ATOM   1666  HB2 ARG X 105     218.438 197.660 283.108  0.00  0.00           H  
ATOM   1667  HB3 ARG X 105     220.064 198.208 283.385  0.00  0.00           H  
ATOM   1668  HG2 ARG X 105     220.755 195.846 282.579  0.00  0.00           H  
ATOM   1669  HG3 ARG X 105     219.111 195.500 282.238  0.00  0.00           H  
ATOM   1670  HD2 ARG X 105     218.785 197.101 280.510  0.00  0.00           H  
ATOM   1671  HD3 ARG X 105     220.391 197.835 280.713  0.00  0.00           H  
ATOM   1672  HE  ARG X 105     220.100 194.920 280.021  0.00  0.00           H  
ATOM   1673 HH11 ARG X 105     221.716 198.047 279.110  0.00  0.00           H  
ATOM   1674 HH12 ARG X 105     222.634 197.085 277.955  0.00  0.00           H  
ATOM   1675 HH21 ARG X 105     221.196 194.070 278.346  0.00  0.00           H  
ATOM   1676 HH22 ARG X 105     222.368 195.177 277.507  0.00  0.00           H  
ATOM   1677  N   ALA X 106     218.012 197.806 286.220  0.00  0.00           N  
ATOM   1678  CA  ALA X 106     217.568 198.825 287.253  0.00  0.00           C  
ATOM   1679  C   ALA X 106     217.415 198.385 288.699  0.00  0.00           C  
ATOM   1680  O   ALA X 106     217.943 198.953 289.669  0.00  0.00           O  
ATOM   1681  CB  ALA X 106     216.273 199.476 286.750  0.00  0.00           C  
ATOM   1682  H   ALA X 106     217.298 197.394 285.638  0.00  0.00           H  
ATOM   1683  HA  ALA X 106     218.361 199.572 287.241  0.00  0.00           H  
ATOM   1684  HB1 ALA X 106     216.526 200.065 285.868  0.00  0.00           H  
ATOM   1685  HB2 ALA X 106     215.813 200.050 287.555  0.00  0.00           H  
ATOM   1686  HB3 ALA X 106     215.492 198.751 286.521  0.00  0.00           H  
ATOM   1687  N   ASN X 107     216.531 197.411 288.901  0.00  0.00           N  
ATOM   1688  CA  ASN X 107     216.289 196.899 290.268  0.00  0.00           C  
ATOM   1689  C   ASN X 107     217.510 196.017 290.685  0.00  0.00           C  
ATOM   1690  O   ASN X 107     217.749 195.930 291.882  0.00  0.00           O  
ATOM   1691  CB  ASN X 107     215.037 196.027 290.338  0.00  0.00           C  
ATOM   1692  CG  ASN X 107     213.869 196.772 289.864  0.00  0.00           C  
ATOM   1693  ND2 ASN X 107     212.794 196.269 290.351  0.00  0.00           N  
ATOM   1694  OD1 ASN X 107     213.776 197.733 289.103  0.00  0.00           O  
ATOM   1695  H   ASN X 107     216.111 196.918 288.126  0.00  0.00           H  
ATOM   1696  HA  ASN X 107     216.277 197.698 291.009  0.00  0.00           H  
ATOM   1697  HB2 ASN X 107     215.140 195.214 289.620  0.00  0.00           H  
ATOM   1698  HB3 ASN X 107     214.803 195.765 291.370  0.00  0.00           H  
ATOM   1699 HD21 ASN X 107     212.870 195.541 291.047  0.00  0.00           H  
ATOM   1700 HD22 ASN X 107     211.944 196.713 290.033  0.00  0.00           H  
ATOM   1701  N   ARG X 108     218.127 195.268 289.744  0.00  0.00           N  
ATOM   1702  CA  ARG X 108     219.390 194.541 289.855  0.00  0.00           C  
ATOM   1703  C   ARG X 108     219.585 193.710 291.122  0.00  0.00           C  
ATOM   1704  O   ARG X 108     220.655 193.703 291.681  0.00  0.00           O  
ATOM   1705  CB  ARG X 108     220.612 195.448 289.594  0.00  0.00           C  
ATOM   1706  CG  ARG X 108     220.878 196.644 290.542  0.00  0.00           C  
ATOM   1707  CD  ARG X 108     222.049 197.554 290.089  0.00  0.00           C  
ATOM   1708  NE  ARG X 108     221.655 198.520 288.994  0.00  0.00           N  
ATOM   1709  CZ  ARG X 108     221.483 199.830 289.049  0.00  0.00           C  
ATOM   1710  NH1 ARG X 108     221.641 200.553 290.112  0.00  0.00           N1+
ATOM   1711  NH2 ARG X 108     221.018 200.426 287.971  0.00  0.00           N  
ATOM   1712  H   ARG X 108     217.745 195.302 288.809  0.00  0.00           H  
ATOM   1713  HA  ARG X 108     219.344 193.842 289.020  0.00  0.00           H  
ATOM   1714  HB2 ARG X 108     221.499 194.816 289.639  0.00  0.00           H  
ATOM   1715  HB3 ARG X 108     220.672 195.909 288.608  0.00  0.00           H  
ATOM   1716  HG2 ARG X 108     219.961 197.234 290.539  0.00  0.00           H  
ATOM   1717  HG3 ARG X 108     221.091 196.316 291.560  0.00  0.00           H  
ATOM   1718  HD2 ARG X 108     222.353 198.052 291.010  0.00  0.00           H  
ATOM   1719  HD3 ARG X 108     222.919 196.996 289.744  0.00  0.00           H  
ATOM   1720  HE  ARG X 108     221.421 198.127 288.093  0.00  0.00           H  
ATOM   1721 HH11 ARG X 108     222.268 200.261 290.847  0.00  0.00           H  
ATOM   1722 HH12 ARG X 108     221.271 201.493 290.097  0.00  0.00           H  
ATOM   1723 HH21 ARG X 108     220.814 199.917 287.122  0.00  0.00           H  
ATOM   1724 HH22 ARG X 108     220.765 201.396 288.095  0.00  0.00           H  
ATOM   1725  N   GLY X 109     218.495 193.018 291.572  0.00  0.00           N  
ATOM   1726  CA  GLY X 109     218.638 192.140 292.755  0.00  0.00           C  
ATOM   1727  C   GLY X 109     218.211 192.754 294.068  0.00  0.00           C  
ATOM   1728  O   GLY X 109     218.410 192.214 295.111  0.00  0.00           O  
ATOM   1729  H   GLY X 109     217.645 192.957 291.029  0.00  0.00           H  
ATOM   1730  HA2 GLY X 109     217.985 191.279 292.618  0.00  0.00           H  
ATOM   1731  HA3 GLY X 109     219.646 191.737 292.852  0.00  0.00           H  
ATOM   1732  N   PHE X 110     217.708 193.982 293.982  0.00  0.00           N  
ATOM   1733  CA  PHE X 110     216.992 194.601 295.063  0.00  0.00           C  
ATOM   1734  C   PHE X 110     215.487 194.657 294.970  0.00  0.00           C  
ATOM   1735  O   PHE X 110     214.932 194.595 293.885  0.00  0.00           O  
ATOM   1736  CB  PHE X 110     217.505 195.969 295.191  0.00  0.00           C  
ATOM   1737  CG  PHE X 110     219.008 196.122 295.388  0.00  0.00           C  
ATOM   1738  CD1 PHE X 110     219.728 195.471 296.459  0.00  0.00           C  
ATOM   1739  CD2 PHE X 110     219.770 196.868 294.517  0.00  0.00           C  
ATOM   1740  CE1 PHE X 110     221.101 195.811 296.746  0.00  0.00           C  
ATOM   1741  CE2 PHE X 110     221.215 197.012 294.684  0.00  0.00           C  
ATOM   1742  CZ  PHE X 110     221.899 196.439 295.762  0.00  0.00           C  
ATOM   1743  H   PHE X 110     217.510 194.413 293.091  0.00  0.00           H  
ATOM   1744  HA  PHE X 110     217.396 194.060 295.918  0.00  0.00           H  
ATOM   1745  HB2 PHE X 110     217.287 196.518 294.274  0.00  0.00           H  
ATOM   1746  HB3 PHE X 110     216.967 196.387 296.042  0.00  0.00           H  
ATOM   1747  HD1 PHE X 110     219.133 194.781 297.038  0.00  0.00           H  
ATOM   1748  HD2 PHE X 110     219.257 197.376 293.714  0.00  0.00           H  
ATOM   1749  HE1 PHE X 110     221.628 195.458 297.621  0.00  0.00           H  
ATOM   1750  HE2 PHE X 110     221.763 197.524 293.907  0.00  0.00           H  
ATOM   1751  HZ  PHE X 110     222.952 196.625 295.916  0.00  0.00           H  
ATOM   1752  N   GLY X 111     214.861 194.855 296.119  0.00  0.00           N  
ATOM   1753  CA  GLY X 111     213.394 194.961 296.313  0.00  0.00           C  
ATOM   1754  C   GLY X 111     212.722 193.664 296.733  0.00  0.00           C  
ATOM   1755  O   GLY X 111     213.172 192.808 297.479  0.00  0.00           O  
ATOM   1756  H   GLY X 111     215.424 195.022 296.940  0.00  0.00           H  
ATOM   1757  HA2 GLY X 111     213.197 195.692 297.097  0.00  0.00           H  
ATOM   1758  HA3 GLY X 111     213.010 195.263 295.339  0.00  0.00           H  
ATOM   1759  N   ILE X 112     211.568 193.562 296.100  0.00  0.00           N  
ATOM   1760  CA  ILE X 112     210.618 192.441 296.360  0.00  0.00           C  
ATOM   1761  C   ILE X 112     210.224 191.783 295.034  0.00  0.00           C  
ATOM   1762  O   ILE X 112     210.343 190.559 294.951  0.00  0.00           O  
ATOM   1763  CB  ILE X 112     209.307 193.031 297.048  0.00  0.00           C  
ATOM   1764  CG1 ILE X 112     209.574 193.766 298.421  0.00  0.00           C  
ATOM   1765  CG2 ILE X 112     208.295 191.934 297.333  0.00  0.00           C  
ATOM   1766  CD1 ILE X 112     208.243 194.319 299.069  0.00  0.00           C  
ATOM   1767  H   ILE X 112     211.244 194.349 295.556  0.00  0.00           H  
ATOM   1768  HA  ILE X 112     211.035 191.657 296.992  0.00  0.00           H  
ATOM   1769  HB  ILE X 112     208.755 193.718 296.407  0.00  0.00           H  
ATOM   1770 HG12 ILE X 112     209.946 193.076 299.180  0.00  0.00           H  
ATOM   1771 HG13 ILE X 112     210.320 194.550 298.295  0.00  0.00           H  
ATOM   1772 HG21 ILE X 112     208.052 191.266 296.507  0.00  0.00           H  
ATOM   1773 HG22 ILE X 112     207.357 192.320 297.731  0.00  0.00           H  
ATOM   1774 HG23 ILE X 112     208.665 191.256 298.102  0.00  0.00           H  
ATOM   1775 HD11 ILE X 112     207.516 194.571 298.296  0.00  0.00           H  
ATOM   1776 HD12 ILE X 112     208.509 195.172 299.692  0.00  0.00           H  
ATOM   1777 HD13 ILE X 112     207.868 193.551 299.746  0.00  0.00           H  
ATOM   1778  N   VAL X 113     209.881 192.551 293.977  0.00  0.00           N  
ATOM   1779  CA  VAL X 113     209.346 192.046 292.770  0.00  0.00           C  
ATOM   1780  C   VAL X 113     210.185 191.163 291.879  0.00  0.00           C  
ATOM   1781  O   VAL X 113     209.764 190.185 291.239  0.00  0.00           O  
ATOM   1782  CB  VAL X 113     208.636 193.126 291.956  0.00  0.00           C  
ATOM   1783  CG1 VAL X 113     209.506 193.935 290.925  0.00  0.00           C  
ATOM   1784  CG2 VAL X 113     207.473 192.542 291.176  0.00  0.00           C  
ATOM   1785  H   VAL X 113     210.211 193.506 293.956  0.00  0.00           H  
ATOM   1786  HA  VAL X 113     208.573 191.374 293.142  0.00  0.00           H  
ATOM   1787  HB  VAL X 113     208.216 193.779 292.721  0.00  0.00           H  
ATOM   1788 HG11 VAL X 113     208.839 194.658 290.456  0.00  0.00           H  
ATOM   1789 HG12 VAL X 113     210.382 194.419 291.357  0.00  0.00           H  
ATOM   1790 HG13 VAL X 113     209.893 193.199 290.220  0.00  0.00           H  
ATOM   1791 HG21 VAL X 113     206.939 191.871 291.849  0.00  0.00           H  
ATOM   1792 HG22 VAL X 113     207.734 191.928 290.314  0.00  0.00           H  
ATOM   1793 HG23 VAL X 113     206.743 193.302 290.898  0.00  0.00           H  
ATOM   1794  N   PHE X 114     211.488 191.528 291.772  0.00  0.00           N  
ATOM   1795  CA  PHE X 114     212.515 190.830 291.026  0.00  0.00           C  
ATOM   1796  C   PHE X 114     213.822 190.544 291.790  0.00  0.00           C  
ATOM   1797  O   PHE X 114     214.859 190.360 291.175  0.00  0.00           O  
ATOM   1798  CB  PHE X 114     212.707 191.542 289.747  0.00  0.00           C  
ATOM   1799  CG  PHE X 114     213.453 190.782 288.630  0.00  0.00           C  
ATOM   1800  CD1 PHE X 114     212.827 189.646 288.093  0.00  0.00           C  
ATOM   1801  CD2 PHE X 114     214.640 191.244 287.985  0.00  0.00           C  
ATOM   1802  CE1 PHE X 114     213.301 188.972 286.952  0.00  0.00           C  
ATOM   1803  CE2 PHE X 114     215.176 190.501 286.886  0.00  0.00           C  
ATOM   1804  CZ  PHE X 114     214.458 189.460 286.291  0.00  0.00           C  
ATOM   1805  H   PHE X 114     211.744 192.452 292.090  0.00  0.00           H  
ATOM   1806  HA  PHE X 114     212.263 189.781 290.874  0.00  0.00           H  
ATOM   1807  HB2 PHE X 114     211.775 191.910 289.318  0.00  0.00           H  
ATOM   1808  HB3 PHE X 114     213.256 192.432 290.054  0.00  0.00           H  
ATOM   1809  HD1 PHE X 114     211.922 189.274 288.551  0.00  0.00           H  
ATOM   1810  HD2 PHE X 114     215.155 192.106 288.382  0.00  0.00           H  
ATOM   1811  HE1 PHE X 114     212.678 188.152 286.626  0.00  0.00           H  
ATOM   1812  HE2 PHE X 114     216.133 190.747 286.453  0.00  0.00           H  
ATOM   1813  HZ  PHE X 114     214.737 189.000 285.355  0.00  0.00           H  
ATOM   1814  N   SER X 115     213.757 190.554 293.081  0.00  0.00           N  
ATOM   1815  CA  SER X 115     214.754 189.995 294.068  0.00  0.00           C  
ATOM   1816  C   SER X 115     214.496 188.529 294.370  0.00  0.00           C  
ATOM   1817  O   SER X 115     213.339 188.181 294.183  0.00  0.00           O  
ATOM   1818  CB  SER X 115     214.685 190.820 295.336  0.00  0.00           C  
ATOM   1819  OG  SER X 115     215.805 190.491 296.147  0.00  0.00           O  
ATOM   1820  H   SER X 115     212.833 190.613 293.483  0.00  0.00           H  
ATOM   1821  HA  SER X 115     215.730 189.973 293.582  0.00  0.00           H  
ATOM   1822  HB2 SER X 115     214.752 191.895 295.166  0.00  0.00           H  
ATOM   1823  HB3 SER X 115     213.708 190.689 295.801  0.00  0.00           H  
ATOM   1824  HG  SER X 115     215.721 191.015 296.947  0.00  0.00           H  
ATOM   1825  N   ASN X 116     215.492 187.773 294.871  0.00  0.00           N  
ATOM   1826  CA  ASN X 116     215.536 186.265 294.875  0.00  0.00           C  
ATOM   1827  C   ASN X 116     216.286 185.702 296.085  0.00  0.00           C  
ATOM   1828  O   ASN X 116     217.126 186.422 296.683  0.00  0.00           O  
ATOM   1829  CB  ASN X 116     216.163 185.779 293.528  0.00  0.00           C  
ATOM   1830  CG  ASN X 116     215.272 185.870 292.274  0.00  0.00           C  
ATOM   1831  ND2 ASN X 116     215.787 186.462 291.210  0.00  0.00           N  
ATOM   1832  OD1 ASN X 116     214.132 185.435 292.176  0.00  0.00           O  
ATOM   1833  H   ASN X 116     216.401 188.180 295.039  0.00  0.00           H  
ATOM   1834  HA  ASN X 116     214.519 185.878 294.822  0.00  0.00           H  
ATOM   1835  HB2 ASN X 116     217.006 186.433 293.306  0.00  0.00           H  
ATOM   1836  HB3 ASN X 116     216.463 184.737 293.637  0.00  0.00           H  
ATOM   1837 HD21 ASN X 116     216.746 186.773 291.156  0.00  0.00           H  
ATOM   1838 HD22 ASN X 116     215.106 186.491 290.464  0.00  0.00           H  
ATOM   1839  N   GLY X 117     216.130 184.430 296.399  0.00  0.00           N  
ATOM   1840  CA  GLY X 117     216.649 183.804 297.626  0.00  0.00           C  
ATOM   1841  C   GLY X 117     216.427 184.583 298.896  0.00  0.00           C  
ATOM   1842  O   GLY X 117     215.495 185.345 299.038  0.00  0.00           O  
ATOM   1843  H   GLY X 117     215.343 183.912 296.037  0.00  0.00           H  
ATOM   1844  HA2 GLY X 117     216.299 182.778 297.740  0.00  0.00           H  
ATOM   1845  HA3 GLY X 117     217.727 183.686 297.519  0.00  0.00           H  
ATOM   1846  N   LYS X 118     217.352 184.407 299.772  0.00  0.00           N  
ATOM   1847  CA  LYS X 118     217.458 185.046 301.061  0.00  0.00           C  
ATOM   1848  C   LYS X 118     217.097 186.511 301.066  0.00  0.00           C  
ATOM   1849  O   LYS X 118     216.432 186.981 301.972  0.00  0.00           O  
ATOM   1850  CB  LYS X 118     218.894 184.778 301.640  0.00  0.00           C  
ATOM   1851  CG  LYS X 118     219.145 185.007 303.173  0.00  0.00           C  
ATOM   1852  CD  LYS X 118     220.623 184.797 303.489  0.00  0.00           C  
ATOM   1853  CE  LYS X 118     220.938 185.326 304.920  0.00  0.00           C  
ATOM   1854  NZ  LYS X 118     222.313 185.081 305.414  0.00  0.00           N1+
ATOM   1855  H   LYS X 118     217.994 183.655 299.565  0.00  0.00           H  
ATOM   1856  HA  LYS X 118     216.692 184.521 301.632  0.00  0.00           H  
ATOM   1857  HB2 LYS X 118     219.330 183.856 301.256  0.00  0.00           H  
ATOM   1858  HB3 LYS X 118     219.502 185.519 301.122  0.00  0.00           H  
ATOM   1859  HG2 LYS X 118     218.917 186.045 303.415  0.00  0.00           H  
ATOM   1860  HG3 LYS X 118     218.651 184.246 303.777  0.00  0.00           H  
ATOM   1861  HD2 LYS X 118     220.831 183.727 303.533  0.00  0.00           H  
ATOM   1862  HD3 LYS X 118     221.265 185.411 302.858  0.00  0.00           H  
ATOM   1863  HE2 LYS X 118     220.865 186.414 304.943  0.00  0.00           H  
ATOM   1864  HE3 LYS X 118     220.249 184.889 305.643  0.00  0.00           H  
ATOM   1865  HZ1 LYS X 118     222.853 185.908 305.627  0.00  0.00           H  
ATOM   1866  HZ2 LYS X 118     222.811 184.536 304.724  0.00  0.00           H  
ATOM   1867  HZ3 LYS X 118     222.272 184.462 306.211  0.00  0.00           H  
ATOM   1868  N   ARG X 119     217.650 187.236 300.123  0.00  0.00           N  
ATOM   1869  CA  ARG X 119     217.578 188.747 300.059  0.00  0.00           C  
ATOM   1870  C   ARG X 119     216.179 189.257 299.927  0.00  0.00           C  
ATOM   1871  O   ARG X 119     215.810 190.165 300.630  0.00  0.00           O  
ATOM   1872  CB  ARG X 119     218.513 189.220 298.957  0.00  0.00           C  
ATOM   1873  CG  ARG X 119     218.494 190.718 298.702  0.00  0.00           C  
ATOM   1874  CD  ARG X 119     219.740 191.233 297.924  0.00  0.00           C  
ATOM   1875  NE  ARG X 119     220.940 191.128 298.792  0.00  0.00           N  
ATOM   1876  CZ  ARG X 119     222.083 191.812 298.751  0.00  0.00           C  
ATOM   1877  NH1 ARG X 119     222.938 191.663 299.699  0.00  0.00           N1+
ATOM   1878  NH2 ARG X 119     222.389 192.655 297.809  0.00  0.00           N  
ATOM   1879  H   ARG X 119     218.116 186.758 299.365  0.00  0.00           H  
ATOM   1880  HA  ARG X 119     217.927 189.169 301.001  0.00  0.00           H  
ATOM   1881  HB2 ARG X 119     219.508 188.875 299.240  0.00  0.00           H  
ATOM   1882  HB3 ARG X 119     218.072 188.832 298.040  0.00  0.00           H  
ATOM   1883  HG2 ARG X 119     217.661 191.063 298.090  0.00  0.00           H  
ATOM   1884  HG3 ARG X 119     218.379 191.195 299.676  0.00  0.00           H  
ATOM   1885  HD2 ARG X 119     219.880 190.649 297.015  0.00  0.00           H  
ATOM   1886  HD3 ARG X 119     219.685 192.278 297.617  0.00  0.00           H  
ATOM   1887  HE  ARG X 119     220.933 190.524 299.601  0.00  0.00           H  
ATOM   1888 HH11 ARG X 119     222.746 191.005 300.440  0.00  0.00           H  
ATOM   1889 HH12 ARG X 119     223.688 192.329 299.823  0.00  0.00           H  
ATOM   1890 HH21 ARG X 119     221.759 192.833 297.040  0.00  0.00           H  
ATOM   1891 HH22 ARG X 119     223.350 192.966 297.814  0.00  0.00           H  
ATOM   1892  N   TRP X 120     215.325 188.626 299.060  0.00  0.00           N  
ATOM   1893  CA  TRP X 120     213.920 188.589 299.043  0.00  0.00           C  
ATOM   1894  C   TRP X 120     213.316 188.020 300.307  0.00  0.00           C  
ATOM   1895  O   TRP X 120     212.488 188.722 300.904  0.00  0.00           O  
ATOM   1896  CB  TRP X 120     213.438 187.919 297.758  0.00  0.00           C  
ATOM   1897  CG  TRP X 120     211.957 187.500 297.754  0.00  0.00           C  
ATOM   1898  CD1 TRP X 120     210.918 188.331 297.431  0.00  0.00           C  
ATOM   1899  CD2 TRP X 120     211.344 186.181 297.926  0.00  0.00           C  
ATOM   1900  CE2 TRP X 120     209.920 186.312 297.798  0.00  0.00           C  
ATOM   1901  CE3 TRP X 120     211.923 184.880 298.063  0.00  0.00           C  
ATOM   1902  NE1 TRP X 120     209.759 187.595 297.528  0.00  0.00           N  
ATOM   1903  CZ2 TRP X 120     209.079 185.186 297.900  0.00  0.00           C  
ATOM   1904  CZ3 TRP X 120     211.044 183.739 298.113  0.00  0.00           C  
ATOM   1905  CH2 TRP X 120     209.641 183.960 298.137  0.00  0.00           C  
ATOM   1906  H   TRP X 120     215.799 187.983 298.441  0.00  0.00           H  
ATOM   1907  HA  TRP X 120     213.470 189.580 298.978  0.00  0.00           H  
ATOM   1908  HB2 TRP X 120     213.697 188.489 296.866  0.00  0.00           H  
ATOM   1909  HB3 TRP X 120     213.987 186.977 297.784  0.00  0.00           H  
ATOM   1910  HD1 TRP X 120     210.955 189.370 297.137  0.00  0.00           H  
ATOM   1911  HE1 TRP X 120     208.844 187.951 297.289  0.00  0.00           H  
ATOM   1912  HE3 TRP X 120     212.995 184.815 298.175  0.00  0.00           H  
ATOM   1913  HZ2 TRP X 120     208.024 185.329 297.720  0.00  0.00           H  
ATOM   1914  HZ3 TRP X 120     211.396 182.719 298.074  0.00  0.00           H  
ATOM   1915  HH2 TRP X 120     209.065 183.063 297.962  0.00  0.00           H  
ATOM   1916  N   LYS X 121     213.492 186.799 300.738  0.00  0.00           N  
ATOM   1917  CA  LYS X 121     212.871 186.129 301.862  0.00  0.00           C  
ATOM   1918  C   LYS X 121     212.971 186.895 303.190  0.00  0.00           C  
ATOM   1919  O   LYS X 121     211.939 187.220 303.820  0.00  0.00           O  
ATOM   1920  CB  LYS X 121     213.553 184.821 302.207  0.00  0.00           C  
ATOM   1921  CG  LYS X 121     213.272 183.790 301.083  0.00  0.00           C  
ATOM   1922  CD  LYS X 121     213.837 182.380 301.276  0.00  0.00           C  
ATOM   1923  CE  LYS X 121     213.080 181.271 300.538  0.00  0.00           C  
ATOM   1924  NZ  LYS X 121     213.643 179.978 301.068  0.00  0.00           N1+
ATOM   1925  H   LYS X 121     214.131 186.181 300.260  0.00  0.00           H  
ATOM   1926  HA  LYS X 121     211.817 185.890 301.721  0.00  0.00           H  
ATOM   1927  HB2 LYS X 121     214.626 184.917 302.371  0.00  0.00           H  
ATOM   1928  HB3 LYS X 121     213.128 184.447 303.139  0.00  0.00           H  
ATOM   1929  HG2 LYS X 121     212.196 183.629 301.139  0.00  0.00           H  
ATOM   1930  HG3 LYS X 121     213.736 184.146 300.163  0.00  0.00           H  
ATOM   1931  HD2 LYS X 121     214.893 182.363 301.007  0.00  0.00           H  
ATOM   1932  HD3 LYS X 121     213.712 182.169 302.338  0.00  0.00           H  
ATOM   1933  HE2 LYS X 121     212.026 181.361 300.802  0.00  0.00           H  
ATOM   1934  HE3 LYS X 121     213.365 181.369 299.490  0.00  0.00           H  
ATOM   1935  HZ1 LYS X 121     213.376 179.855 302.035  0.00  0.00           H  
ATOM   1936  HZ2 LYS X 121     214.645 179.870 301.137  0.00  0.00           H  
ATOM   1937  HZ3 LYS X 121     213.267 179.241 300.489  0.00  0.00           H  
ATOM   1938  N   GLU X 122     214.149 187.393 303.519  0.00  0.00           N  
ATOM   1939  CA  GLU X 122     214.371 188.288 304.680  0.00  0.00           C  
ATOM   1940  C   GLU X 122     213.663 189.651 304.560  0.00  0.00           C  
ATOM   1941  O   GLU X 122     212.830 189.972 305.423  0.00  0.00           O  
ATOM   1942  CB  GLU X 122     215.812 188.481 304.992  0.00  0.00           C  
ATOM   1943  CG  GLU X 122     216.572 187.207 305.257  0.00  0.00           C  
ATOM   1944  CD  GLU X 122     216.058 186.370 306.443  0.00  0.00           C  
ATOM   1945  OE1 GLU X 122     216.141 186.782 307.587  0.00  0.00           O  
ATOM   1946  OE2 GLU X 122     215.615 185.192 306.299  0.00  0.00           O1-
ATOM   1947  H   GLU X 122     214.930 187.096 302.953  0.00  0.00           H  
ATOM   1948  HA  GLU X 122     213.916 187.791 305.537  0.00  0.00           H  
ATOM   1949  HB2 GLU X 122     216.209 188.897 304.066  0.00  0.00           H  
ATOM   1950  HB3 GLU X 122     215.975 189.009 305.932  0.00  0.00           H  
ATOM   1951  HG2 GLU X 122     216.458 186.623 304.344  0.00  0.00           H  
ATOM   1952  HG3 GLU X 122     217.611 187.514 305.376  0.00  0.00           H  
ATOM   1953  N   ILE X 123     213.946 190.463 303.493  0.00  0.00           N  
ATOM   1954  CA  ILE X 123     213.146 191.733 303.291  0.00  0.00           C  
ATOM   1955  C   ILE X 123     211.697 191.536 303.165  0.00  0.00           C  
ATOM   1956  O   ILE X 123     210.921 192.331 303.710  0.00  0.00           O  
ATOM   1957  CB  ILE X 123     213.716 192.464 302.040  0.00  0.00           C  
ATOM   1958  CG1 ILE X 123     215.048 193.239 302.331  0.00  0.00           C  
ATOM   1959  CG2 ILE X 123     212.804 193.439 301.317  0.00  0.00           C  
ATOM   1960  CD1 ILE X 123     216.162 192.514 303.084  0.00  0.00           C  
ATOM   1961  H   ILE X 123     214.523 190.093 302.751  0.00  0.00           H  
ATOM   1962  HA  ILE X 123     213.255 192.551 304.004  0.00  0.00           H  
ATOM   1963  HB  ILE X 123     213.856 191.772 301.210  0.00  0.00           H  
ATOM   1964 HG12 ILE X 123     215.390 193.479 301.325  0.00  0.00           H  
ATOM   1965 HG13 ILE X 123     214.809 194.192 302.804  0.00  0.00           H  
ATOM   1966 HG21 ILE X 123     213.345 193.716 300.413  0.00  0.00           H  
ATOM   1967 HG22 ILE X 123     212.599 194.270 301.993  0.00  0.00           H  
ATOM   1968 HG23 ILE X 123     211.874 192.930 301.063  0.00  0.00           H  
ATOM   1969 HD11 ILE X 123     216.989 193.221 303.020  0.00  0.00           H  
ATOM   1970 HD12 ILE X 123     216.356 191.561 302.592  0.00  0.00           H  
ATOM   1971 HD13 ILE X 123     215.906 192.303 304.122  0.00  0.00           H  
ATOM   1972  N   ARG X 124     211.194 190.480 302.546  0.00  0.00           N  
ATOM   1973  CA  ARG X 124     209.727 190.180 302.368  0.00  0.00           C  
ATOM   1974  C   ARG X 124     209.196 189.966 303.691  0.00  0.00           C  
ATOM   1975  O   ARG X 124     208.140 190.518 303.978  0.00  0.00           O  
ATOM   1976  CB  ARG X 124     209.568 188.929 301.437  0.00  0.00           C  
ATOM   1977  CG  ARG X 124     208.089 188.705 301.115  0.00  0.00           C  
ATOM   1978  CD  ARG X 124     207.756 187.260 300.633  0.00  0.00           C  
ATOM   1979  NE  ARG X 124     206.412 186.846 300.856  0.00  0.00           N  
ATOM   1980  CZ  ARG X 124     205.452 186.731 299.948  0.00  0.00           C  
ATOM   1981  NH1 ARG X 124     205.594 187.002 298.648  0.00  0.00           N1+
ATOM   1982  NH2 ARG X 124     204.291 186.320 300.402  0.00  0.00           N  
ATOM   1983  H   ARG X 124     211.848 189.766 302.257  0.00  0.00           H  
ATOM   1984  HA  ARG X 124     209.364 191.108 301.927  0.00  0.00           H  
ATOM   1985  HB2 ARG X 124     210.077 189.040 300.479  0.00  0.00           H  
ATOM   1986  HB3 ARG X 124     209.960 188.009 301.871  0.00  0.00           H  
ATOM   1987  HG2 ARG X 124     207.498 188.916 302.007  0.00  0.00           H  
ATOM   1988  HG3 ARG X 124     207.736 189.289 300.265  0.00  0.00           H  
ATOM   1989  HD2 ARG X 124     208.004 187.195 299.573  0.00  0.00           H  
ATOM   1990  HD3 ARG X 124     208.393 186.650 301.274  0.00  0.00           H  
ATOM   1991  HE  ARG X 124     206.098 186.739 301.810  0.00  0.00           H  
ATOM   1992 HH11 ARG X 124     206.509 187.220 298.281  0.00  0.00           H  
ATOM   1993 HH12 ARG X 124     204.757 187.024 298.083  0.00  0.00           H  
ATOM   1994 HH21 ARG X 124     204.199 186.050 301.371  0.00  0.00           H  
ATOM   1995 HH22 ARG X 124     203.497 186.260 299.781  0.00  0.00           H  
ATOM   1996  N   ARG X 125     209.866 189.305 304.717  0.00  0.00           N  
ATOM   1997  CA  ARG X 125     209.307 188.994 306.042  0.00  0.00           C  
ATOM   1998  C   ARG X 125     209.234 190.290 306.838  0.00  0.00           C  
ATOM   1999  O   ARG X 125     208.166 190.692 307.382  0.00  0.00           O  
ATOM   2000  CB  ARG X 125     210.111 187.787 306.637  0.00  0.00           C  
ATOM   2001  CG  ARG X 125     209.412 186.733 307.534  0.00  0.00           C  
ATOM   2002  CD  ARG X 125     210.194 185.668 308.419  0.00  0.00           C  
ATOM   2003  NE  ARG X 125     211.127 184.871 307.620  0.00  0.00           N  
ATOM   2004  CZ  ARG X 125     212.406 185.061 307.287  0.00  0.00           C  
ATOM   2005  NH1 ARG X 125     213.073 186.025 307.708  0.00  0.00           N1+
ATOM   2006  NH2 ARG X 125     213.036 184.313 306.442  0.00  0.00           N  
ATOM   2007  H   ARG X 125     210.731 188.858 304.447  0.00  0.00           H  
ATOM   2008  HA  ARG X 125     208.296 188.607 305.915  0.00  0.00           H  
ATOM   2009  HB2 ARG X 125     210.621 187.252 305.836  0.00  0.00           H  
ATOM   2010  HB3 ARG X 125     210.869 188.261 307.260  0.00  0.00           H  
ATOM   2011  HG2 ARG X 125     208.832 187.230 308.311  0.00  0.00           H  
ATOM   2012  HG3 ARG X 125     208.702 186.167 306.932  0.00  0.00           H  
ATOM   2013  HD2 ARG X 125     210.760 186.170 309.203  0.00  0.00           H  
ATOM   2014  HD3 ARG X 125     209.514 185.050 309.007  0.00  0.00           H  
ATOM   2015  HE  ARG X 125     210.707 184.073 307.166  0.00  0.00           H  
ATOM   2016 HH11 ARG X 125     212.682 186.432 308.545  0.00  0.00           H  
ATOM   2017 HH12 ARG X 125     214.074 185.939 307.607  0.00  0.00           H  
ATOM   2018 HH21 ARG X 125     212.682 183.387 306.245  0.00  0.00           H  
ATOM   2019 HH22 ARG X 125     214.006 184.498 306.229  0.00  0.00           H  
ATOM   2020  N   PHE X 126     210.267 191.097 306.955  0.00  0.00           N  
ATOM   2021  CA  PHE X 126     210.339 192.456 307.444  0.00  0.00           C  
ATOM   2022  C   PHE X 126     209.115 193.262 306.905  0.00  0.00           C  
ATOM   2023  O   PHE X 126     208.396 193.860 307.714  0.00  0.00           O  
ATOM   2024  CB  PHE X 126     211.648 193.071 307.021  0.00  0.00           C  
ATOM   2025  CG  PHE X 126     211.629 194.587 307.060  0.00  0.00           C  
ATOM   2026  CD1 PHE X 126     211.429 195.303 305.839  0.00  0.00           C  
ATOM   2027  CD2 PHE X 126     211.706 195.329 308.240  0.00  0.00           C  
ATOM   2028  CE1 PHE X 126     211.120 196.700 305.841  0.00  0.00           C  
ATOM   2029  CE2 PHE X 126     211.464 196.688 308.282  0.00  0.00           C  
ATOM   2030  CZ  PHE X 126     211.198 197.378 307.094  0.00  0.00           C  
ATOM   2031  H   PHE X 126     211.077 190.694 306.505  0.00  0.00           H  
ATOM   2032  HA  PHE X 126     210.322 192.429 308.533  0.00  0.00           H  
ATOM   2033  HB2 PHE X 126     212.505 192.736 307.606  0.00  0.00           H  
ATOM   2034  HB3 PHE X 126     211.902 192.833 305.988  0.00  0.00           H  
ATOM   2035  HD1 PHE X 126     211.507 194.756 304.911  0.00  0.00           H  
ATOM   2036  HD2 PHE X 126     211.864 194.828 309.183  0.00  0.00           H  
ATOM   2037  HE1 PHE X 126     210.798 197.222 304.951  0.00  0.00           H  
ATOM   2038  HE2 PHE X 126     211.676 197.182 309.218  0.00  0.00           H  
ATOM   2039  HZ  PHE X 126     210.839 198.392 307.004  0.00  0.00           H  
ATOM   2040  N   SER X 127     208.854 193.331 305.593  0.00  0.00           N  
ATOM   2041  CA  SER X 127     207.755 194.034 304.910  0.00  0.00           C  
ATOM   2042  C   SER X 127     206.349 193.484 305.361  0.00  0.00           C  
ATOM   2043  O   SER X 127     205.448 194.275 305.484  0.00  0.00           O  
ATOM   2044  CB  SER X 127     207.842 193.846 303.343  0.00  0.00           C  
ATOM   2045  OG  SER X 127     209.093 194.249 302.813  0.00  0.00           O  
ATOM   2046  H   SER X 127     209.545 192.939 304.969  0.00  0.00           H  
ATOM   2047  HA  SER X 127     207.816 195.099 305.132  0.00  0.00           H  
ATOM   2048  HB2 SER X 127     207.575 192.803 303.173  0.00  0.00           H  
ATOM   2049  HB3 SER X 127     207.017 194.437 302.947  0.00  0.00           H  
ATOM   2050  HG  SER X 127     209.744 193.543 302.792  0.00  0.00           H  
ATOM   2051  N   LEU X 128     206.228 192.255 305.745  0.00  0.00           N  
ATOM   2052  CA  LEU X 128     204.926 191.640 306.199  0.00  0.00           C  
ATOM   2053  C   LEU X 128     204.694 191.944 307.712  0.00  0.00           C  
ATOM   2054  O   LEU X 128     203.568 192.123 308.051  0.00  0.00           O  
ATOM   2055  CB  LEU X 128     204.947 190.160 305.676  0.00  0.00           C  
ATOM   2056  CG  LEU X 128     204.678 189.964 304.153  0.00  0.00           C  
ATOM   2057  CD1 LEU X 128     204.759 188.521 303.731  0.00  0.00           C  
ATOM   2058  CD2 LEU X 128     203.218 190.505 303.827  0.00  0.00           C  
ATOM   2059  H   LEU X 128     206.987 191.606 305.590  0.00  0.00           H  
ATOM   2060  HA  LEU X 128     204.152 192.209 305.683  0.00  0.00           H  
ATOM   2061  HB2 LEU X 128     205.867 189.640 305.942  0.00  0.00           H  
ATOM   2062  HB3 LEU X 128     204.044 189.735 306.114  0.00  0.00           H  
ATOM   2063  HG  LEU X 128     205.380 190.574 303.586  0.00  0.00           H  
ATOM   2064 HD11 LEU X 128     205.746 188.071 303.839  0.00  0.00           H  
ATOM   2065 HD12 LEU X 128     204.469 188.477 302.681  0.00  0.00           H  
ATOM   2066 HD13 LEU X 128     204.060 187.909 304.300  0.00  0.00           H  
ATOM   2067 HD21 LEU X 128     202.982 190.178 302.814  0.00  0.00           H  
ATOM   2068 HD22 LEU X 128     202.458 190.060 304.470  0.00  0.00           H  
ATOM   2069 HD23 LEU X 128     203.201 191.594 303.781  0.00  0.00           H  
ATOM   2070  N   MET X 129     205.706 192.094 308.538  0.00  0.00           N  
ATOM   2071  CA  MET X 129     205.624 192.678 309.862  0.00  0.00           C  
ATOM   2072  C   MET X 129     205.265 194.149 309.887  0.00  0.00           C  
ATOM   2073  O   MET X 129     204.651 194.641 310.778  0.00  0.00           O  
ATOM   2074  CB  MET X 129     206.970 192.391 310.590  0.00  0.00           C  
ATOM   2075  CG  MET X 129     207.064 193.038 311.956  0.00  0.00           C  
ATOM   2076  SD  MET X 129     205.675 192.755 313.032  0.00  0.00           S  
ATOM   2077  CE  MET X 129     206.453 193.115 314.638  0.00  0.00           C  
ATOM   2078  H   MET X 129     206.604 191.826 308.160  0.00  0.00           H  
ATOM   2079  HA  MET X 129     204.800 192.222 310.410  0.00  0.00           H  
ATOM   2080  HB2 MET X 129     207.013 191.337 310.862  0.00  0.00           H  
ATOM   2081  HB3 MET X 129     207.805 192.756 309.991  0.00  0.00           H  
ATOM   2082  HG2 MET X 129     207.950 192.701 312.494  0.00  0.00           H  
ATOM   2083  HG3 MET X 129     207.215 194.109 311.828  0.00  0.00           H  
ATOM   2084  HE1 MET X 129     207.273 192.397 314.659  0.00  0.00           H  
ATOM   2085  HE2 MET X 129     206.744 194.163 314.707  0.00  0.00           H  
ATOM   2086  HE3 MET X 129     205.785 192.771 315.428  0.00  0.00           H  
ATOM   2087  N   THR X 130     205.693 194.884 308.880  0.00  0.00           N  
ATOM   2088  CA  THR X 130     205.619 196.374 308.770  0.00  0.00           C  
ATOM   2089  C   THR X 130     204.222 196.779 308.208  0.00  0.00           C  
ATOM   2090  O   THR X 130     203.762 197.896 308.440  0.00  0.00           O  
ATOM   2091  CB  THR X 130     206.839 196.829 307.949  0.00  0.00           C  
ATOM   2092  CG2 THR X 130     206.981 198.278 307.775  0.00  0.00           C  
ATOM   2093  OG1 THR X 130     208.049 196.447 308.592  0.00  0.00           O  
ATOM   2094  H   THR X 130     206.220 194.429 308.149  0.00  0.00           H  
ATOM   2095  HA  THR X 130     205.716 196.828 309.756  0.00  0.00           H  
ATOM   2096  HB  THR X 130     206.861 196.219 307.046  0.00  0.00           H  
ATOM   2097  HG1 THR X 130     208.435 195.670 308.182  0.00  0.00           H  
ATOM   2098 HG21 THR X 130     206.214 198.611 307.075  0.00  0.00           H  
ATOM   2099 HG22 THR X 130     207.898 198.618 307.293  0.00  0.00           H  
ATOM   2100 HG23 THR X 130     207.037 198.799 308.730  0.00  0.00           H  
ATOM   2101  N   LEU X 131     203.574 195.880 307.429  0.00  0.00           N  
ATOM   2102  CA  LEU X 131     202.177 195.964 306.961  0.00  0.00           C  
ATOM   2103  C   LEU X 131     201.146 195.461 307.945  0.00  0.00           C  
ATOM   2104  O   LEU X 131     199.972 195.462 307.501  0.00  0.00           O  
ATOM   2105  CB  LEU X 131     202.055 195.222 305.618  0.00  0.00           C  
ATOM   2106  CG  LEU X 131     201.068 195.710 304.569  0.00  0.00           C  
ATOM   2107  CD1 LEU X 131     201.773 196.862 303.797  0.00  0.00           C  
ATOM   2108  CD2 LEU X 131     200.668 194.624 303.538  0.00  0.00           C  
ATOM   2109  H   LEU X 131     204.097 195.057 307.168  0.00  0.00           H  
ATOM   2110  HA  LEU X 131     201.958 197.024 306.833  0.00  0.00           H  
ATOM   2111  HB2 LEU X 131     203.037 195.140 305.153  0.00  0.00           H  
ATOM   2112  HB3 LEU X 131     201.712 194.220 305.877  0.00  0.00           H  
ATOM   2113  HG  LEU X 131     200.164 196.123 305.015  0.00  0.00           H  
ATOM   2114 HD11 LEU X 131     202.574 196.509 303.148  0.00  0.00           H  
ATOM   2115 HD12 LEU X 131     202.246 197.558 304.491  0.00  0.00           H  
ATOM   2116 HD13 LEU X 131     201.095 197.331 303.084  0.00  0.00           H  
ATOM   2117 HD21 LEU X 131     199.924 194.976 302.824  0.00  0.00           H  
ATOM   2118 HD22 LEU X 131     201.433 194.181 302.901  0.00  0.00           H  
ATOM   2119 HD23 LEU X 131     200.184 193.829 304.106  0.00  0.00           H  
ATOM   2120  N   ARG X 132     201.334 195.120 309.241  0.00  0.00           N  
ATOM   2121  CA  ARG X 132     200.343 194.736 310.284  0.00  0.00           C  
ATOM   2122  C   ARG X 132     199.488 195.941 310.784  0.00  0.00           C  
ATOM   2123  O   ARG X 132     200.013 197.024 311.137  0.00  0.00           O  
ATOM   2124  CB  ARG X 132     200.987 194.013 311.447  0.00  0.00           C  
ATOM   2125  CG  ARG X 132     201.908 192.797 311.129  0.00  0.00           C  
ATOM   2126  CD  ARG X 132     201.337 191.824 310.049  0.00  0.00           C  
ATOM   2127  NE  ARG X 132     200.088 191.304 310.609  0.00  0.00           N  
ATOM   2128  CZ  ARG X 132     199.407 190.323 310.157  0.00  0.00           C  
ATOM   2129  NH1 ARG X 132     199.673 189.654 309.075  0.00  0.00           N1+
ATOM   2130  NH2 ARG X 132     198.300 189.905 310.699  0.00  0.00           N  
ATOM   2131  H   ARG X 132     202.299 195.307 309.475  0.00  0.00           H  
ATOM   2132  HA  ARG X 132     199.680 194.021 309.798  0.00  0.00           H  
ATOM   2133  HB2 ARG X 132     201.520 194.688 312.115  0.00  0.00           H  
ATOM   2134  HB3 ARG X 132     200.155 193.598 312.015  0.00  0.00           H  
ATOM   2135  HG2 ARG X 132     202.863 193.204 310.796  0.00  0.00           H  
ATOM   2136  HG3 ARG X 132     202.071 192.099 311.950  0.00  0.00           H  
ATOM   2137  HD2 ARG X 132     201.291 192.294 309.067  0.00  0.00           H  
ATOM   2138  HD3 ARG X 132     202.082 191.030 309.994  0.00  0.00           H  
ATOM   2139  HE  ARG X 132     199.824 191.669 311.513  0.00  0.00           H  
ATOM   2140 HH11 ARG X 132     200.564 189.694 308.602  0.00  0.00           H  
ATOM   2141 HH12 ARG X 132     198.961 189.224 308.502  0.00  0.00           H  
ATOM   2142 HH21 ARG X 132     198.030 190.220 311.620  0.00  0.00           H  
ATOM   2143 HH22 ARG X 132     197.730 189.228 310.212  0.00  0.00           H  
ATOM   2144  N   ASN X 133     198.218 195.673 311.030  0.00  0.00           N  
ATOM   2145  CA  ASN X 133     197.090 196.633 311.253  0.00  0.00           C  
ATOM   2146  C   ASN X 133     197.456 197.844 312.177  0.00  0.00           C  
ATOM   2147  O   ASN X 133     197.300 199.005 311.845  0.00  0.00           O  
ATOM   2148  CB  ASN X 133     195.775 196.002 311.643  0.00  0.00           C  
ATOM   2149  CG  ASN X 133     194.718 197.008 311.962  0.00  0.00           C  
ATOM   2150  ND2 ASN X 133     194.247 197.780 311.031  0.00  0.00           N  
ATOM   2151  OD1 ASN X 133     194.257 197.030 313.142  0.00  0.00           O  
ATOM   2152  H   ASN X 133     197.876 194.756 310.780  0.00  0.00           H  
ATOM   2153  HA  ASN X 133     197.060 196.994 310.225  0.00  0.00           H  
ATOM   2154  HB2 ASN X 133     195.493 195.403 310.777  0.00  0.00           H  
ATOM   2155  HB3 ASN X 133     196.013 195.323 312.462  0.00  0.00           H  
ATOM   2156 HD21 ASN X 133     194.614 197.695 310.094  0.00  0.00           H  
ATOM   2157 HD22 ASN X 133     193.712 198.590 311.309  0.00  0.00           H  
ATOM   2158  N   PHE X 134     197.991 197.481 313.348  0.00  0.00           N  
ATOM   2159  CA  PHE X 134     198.707 198.453 314.247  0.00  0.00           C  
ATOM   2160  C   PHE X 134     200.129 197.962 314.712  0.00  0.00           C  
ATOM   2161  O   PHE X 134     200.466 196.772 314.905  0.00  0.00           O  
ATOM   2162  CB  PHE X 134     197.814 198.665 315.497  0.00  0.00           C  
ATOM   2163  CG  PHE X 134     198.445 199.540 316.667  0.00  0.00           C  
ATOM   2164  CD1 PHE X 134     198.966 198.831 317.770  0.00  0.00           C  
ATOM   2165  CD2 PHE X 134     198.311 200.942 316.814  0.00  0.00           C  
ATOM   2166  CE1 PHE X 134     199.537 199.484 318.881  0.00  0.00           C  
ATOM   2167  CE2 PHE X 134     198.858 201.628 317.919  0.00  0.00           C  
ATOM   2168  CZ  PHE X 134     199.580 200.877 318.907  0.00  0.00           C  
ATOM   2169  H   PHE X 134     198.159 196.493 313.470  0.00  0.00           H  
ATOM   2170  HA  PHE X 134     198.744 199.447 313.800  0.00  0.00           H  
ATOM   2171  HB2 PHE X 134     196.874 199.143 315.222  0.00  0.00           H  
ATOM   2172  HB3 PHE X 134     197.500 197.715 315.931  0.00  0.00           H  
ATOM   2173  HD1 PHE X 134     199.032 197.759 317.882  0.00  0.00           H  
ATOM   2174  HD2 PHE X 134     197.912 201.533 316.003  0.00  0.00           H  
ATOM   2175  HE1 PHE X 134     199.950 198.918 319.703  0.00  0.00           H  
ATOM   2176  HE2 PHE X 134     198.713 202.688 318.071  0.00  0.00           H  
ATOM   2177  HZ  PHE X 134     199.961 201.326 319.813  0.00  0.00           H  
ATOM   2178  N   GLY X 135     200.942 199.025 314.931  0.00  0.00           N  
ATOM   2179  CA  GLY X 135     202.283 199.004 315.537  0.00  0.00           C  
ATOM   2180  C   GLY X 135     203.160 200.121 315.023  0.00  0.00           C  
ATOM   2181  O   GLY X 135     203.406 201.103 315.716  0.00  0.00           O  
ATOM   2182  H   GLY X 135     200.727 199.902 314.478  0.00  0.00           H  
ATOM   2183  HA2 GLY X 135     202.278 198.995 316.627  0.00  0.00           H  
ATOM   2184  HA3 GLY X 135     202.668 198.053 315.170  0.00  0.00           H  
ATOM   2185  N   MET X 136     203.800 199.995 313.835  0.00  0.00           N  
ATOM   2186  CA  MET X 136     204.606 201.120 313.180  0.00  0.00           C  
ATOM   2187  C   MET X 136     203.631 202.296 312.916  0.00  0.00           C  
ATOM   2188  O   MET X 136     202.488 202.083 312.502  0.00  0.00           O  
ATOM   2189  CB  MET X 136     205.247 200.620 311.907  0.00  0.00           C  
ATOM   2190  CG  MET X 136     205.701 201.641 310.810  0.00  0.00           C  
ATOM   2191  SD  MET X 136     204.417 202.360 309.667  0.00  0.00           S  
ATOM   2192  CE  MET X 136     204.740 201.331 308.250  0.00  0.00           C  
ATOM   2193  H   MET X 136     203.541 199.234 313.223  0.00  0.00           H  
ATOM   2194  HA  MET X 136     205.426 201.471 313.808  0.00  0.00           H  
ATOM   2195  HB2 MET X 136     206.055 199.941 312.179  0.00  0.00           H  
ATOM   2196  HB3 MET X 136     204.605 199.940 311.348  0.00  0.00           H  
ATOM   2197  HG2 MET X 136     206.149 202.492 311.324  0.00  0.00           H  
ATOM   2198  HG3 MET X 136     206.464 201.115 310.236  0.00  0.00           H  
ATOM   2199  HE1 MET X 136     204.336 201.815 307.361  0.00  0.00           H  
ATOM   2200  HE2 MET X 136     205.815 201.239 308.096  0.00  0.00           H  
ATOM   2201  HE3 MET X 136     204.270 200.348 308.295  0.00  0.00           H  
ATOM   2202  N   GLY X 137     204.124 203.494 313.128  0.00  0.00           N  
ATOM   2203  CA  GLY X 137     203.377 204.717 312.874  0.00  0.00           C  
ATOM   2204  C   GLY X 137     202.303 205.120 313.904  0.00  0.00           C  
ATOM   2205  O   GLY X 137     201.705 204.301 314.658  0.00  0.00           O  
ATOM   2206  H   GLY X 137     205.049 203.633 313.508  0.00  0.00           H  
ATOM   2207  HA2 GLY X 137     204.042 205.581 312.888  0.00  0.00           H  
ATOM   2208  HA3 GLY X 137     202.946 204.661 311.874  0.00  0.00           H  
ATOM   2209  N   LYS X 138     201.936 206.379 314.077  0.00  0.00           N  
ATOM   2210  CA  LYS X 138     200.943 206.745 315.117  0.00  0.00           C  
ATOM   2211  C   LYS X 138     199.547 206.437 314.672  0.00  0.00           C  
ATOM   2212  O   LYS X 138     198.723 206.688 315.521  0.00  0.00           O  
ATOM   2213  CB  LYS X 138     200.931 208.304 315.504  0.00  0.00           C  
ATOM   2214  CG  LYS X 138     202.325 208.792 315.852  0.00  0.00           C  
ATOM   2215  CD  LYS X 138     202.688 208.206 317.250  0.00  0.00           C  
ATOM   2216  CE  LYS X 138     204.166 208.586 317.742  0.00  0.00           C  
ATOM   2217  NZ  LYS X 138     205.199 208.201 316.685  0.00  0.00           N1+
ATOM   2218  H   LYS X 138     202.442 207.050 313.517  0.00  0.00           H  
ATOM   2219  HA  LYS X 138     201.159 206.156 316.008  0.00  0.00           H  
ATOM   2220  HB2 LYS X 138     200.502 208.903 314.701  0.00  0.00           H  
ATOM   2221  HB3 LYS X 138     200.215 208.449 316.313  0.00  0.00           H  
ATOM   2222  HG2 LYS X 138     203.021 208.562 315.046  0.00  0.00           H  
ATOM   2223  HG3 LYS X 138     202.362 209.881 315.873  0.00  0.00           H  
ATOM   2224  HD2 LYS X 138     202.023 208.554 318.041  0.00  0.00           H  
ATOM   2225  HD3 LYS X 138     202.662 207.124 317.116  0.00  0.00           H  
ATOM   2226  HE2 LYS X 138     204.302 209.644 317.967  0.00  0.00           H  
ATOM   2227  HE3 LYS X 138     204.400 208.033 318.651  0.00  0.00           H  
ATOM   2228  HZ1 LYS X 138     206.092 208.575 316.972  0.00  0.00           H  
ATOM   2229  HZ2 LYS X 138     205.038 208.734 315.841  0.00  0.00           H  
ATOM   2230  HZ3 LYS X 138     205.288 207.207 316.533  0.00  0.00           H  
ATOM   2231  N   ARG X 139     199.243 205.935 313.502  0.00  0.00           N  
ATOM   2232  CA  ARG X 139     197.796 205.706 313.085  0.00  0.00           C  
ATOM   2233  C   ARG X 139     197.714 204.309 312.421  0.00  0.00           C  
ATOM   2234  O   ARG X 139     198.482 203.978 311.521  0.00  0.00           O  
ATOM   2235  CB  ARG X 139     197.495 206.831 312.020  0.00  0.00           C  
ATOM   2236  CG  ARG X 139     196.033 206.753 311.462  0.00  0.00           C  
ATOM   2237  CD  ARG X 139     195.632 207.747 310.426  0.00  0.00           C  
ATOM   2238  NE  ARG X 139     195.334 209.038 311.107  0.00  0.00           N  
ATOM   2239  CZ  ARG X 139     194.243 209.774 311.010  0.00  0.00           C  
ATOM   2240  NH1 ARG X 139     193.222 209.347 310.391  0.00  0.00           N1+
ATOM   2241  NH2 ARG X 139     194.260 210.980 311.469  0.00  0.00           N  
ATOM   2242  H   ARG X 139     199.949 205.708 312.816  0.00  0.00           H  
ATOM   2243  HA  ARG X 139     197.066 205.565 313.882  0.00  0.00           H  
ATOM   2244  HB2 ARG X 139     197.585 207.822 312.464  0.00  0.00           H  
ATOM   2245  HB3 ARG X 139     198.120 206.754 311.130  0.00  0.00           H  
ATOM   2246  HG2 ARG X 139     195.890 205.729 311.115  0.00  0.00           H  
ATOM   2247  HG3 ARG X 139     195.380 206.929 312.317  0.00  0.00           H  
ATOM   2248  HD2 ARG X 139     196.401 208.074 309.726  0.00  0.00           H  
ATOM   2249  HD3 ARG X 139     194.863 207.289 309.803  0.00  0.00           H  
ATOM   2250  HE  ARG X 139     196.176 209.407 311.525  0.00  0.00           H  
ATOM   2251 HH11 ARG X 139     193.232 208.467 309.896  0.00  0.00           H  
ATOM   2252 HH12 ARG X 139     192.504 209.966 310.042  0.00  0.00           H  
ATOM   2253 HH21 ARG X 139     195.097 211.328 311.916  0.00  0.00           H  
ATOM   2254 HH22 ARG X 139     193.473 211.611 311.517  0.00  0.00           H  
ATOM   2255  N   SER X 140     196.737 203.533 312.921  0.00  0.00           N  
ATOM   2256  CA  SER X 140     196.561 202.137 312.391  0.00  0.00           C  
ATOM   2257  C   SER X 140     196.001 202.069 310.951  0.00  0.00           C  
ATOM   2258  O   SER X 140     195.357 202.996 310.549  0.00  0.00           O  
ATOM   2259  CB  SER X 140     195.584 201.416 313.301  0.00  0.00           C  
ATOM   2260  OG  SER X 140     194.372 202.141 313.203  0.00  0.00           O  
ATOM   2261  H   SER X 140     196.037 203.951 313.516  0.00  0.00           H  
ATOM   2262  HA  SER X 140     197.519 201.626 312.291  0.00  0.00           H  
ATOM   2263  HB2 SER X 140     195.513 200.391 312.936  0.00  0.00           H  
ATOM   2264  HB3 SER X 140     195.895 201.318 314.341  0.00  0.00           H  
ATOM   2265  HG  SER X 140     193.811 201.444 312.855  0.00  0.00           H  
ATOM   2266  N   ILE X 141     196.265 200.961 310.209  0.00  0.00           N  
ATOM   2267  CA  ILE X 141     196.159 201.027 308.720  0.00  0.00           C  
ATOM   2268  C   ILE X 141     194.683 201.290 308.239  0.00  0.00           C  
ATOM   2269  O   ILE X 141     194.437 202.063 307.314  0.00  0.00           O  
ATOM   2270  CB  ILE X 141     196.734 199.683 308.257  0.00  0.00           C  
ATOM   2271  CG1 ILE X 141     198.349 199.753 308.298  0.00  0.00           C  
ATOM   2272  CG2 ILE X 141     196.300 199.372 306.791  0.00  0.00           C  
ATOM   2273  CD1 ILE X 141     198.997 198.384 307.806  0.00  0.00           C  
ATOM   2274  H   ILE X 141     196.708 200.187 310.682  0.00  0.00           H  
ATOM   2275  HA  ILE X 141     196.792 201.802 308.286  0.00  0.00           H  
ATOM   2276  HB  ILE X 141     196.227 198.944 308.878  0.00  0.00           H  
ATOM   2277 HG12 ILE X 141     198.659 200.639 307.744  0.00  0.00           H  
ATOM   2278 HG13 ILE X 141     198.677 200.006 309.306  0.00  0.00           H  
ATOM   2279 HG21 ILE X 141     195.221 199.327 306.647  0.00  0.00           H  
ATOM   2280 HG22 ILE X 141     196.545 198.344 306.522  0.00  0.00           H  
ATOM   2281 HG23 ILE X 141     196.851 200.026 306.115  0.00  0.00           H  
ATOM   2282 HD11 ILE X 141     199.998 198.452 308.234  0.00  0.00           H  
ATOM   2283 HD12 ILE X 141     198.951 198.423 306.718  0.00  0.00           H  
ATOM   2284 HD13 ILE X 141     198.422 197.521 308.141  0.00  0.00           H  
ATOM   2285  N   GLU X 142     193.740 200.756 308.964  0.00  0.00           N  
ATOM   2286  CA  GLU X 142     192.317 200.980 308.735  0.00  0.00           C  
ATOM   2287  C   GLU X 142     191.973 202.492 308.832  0.00  0.00           C  
ATOM   2288  O   GLU X 142     191.238 202.900 307.883  0.00  0.00           O  
ATOM   2289  CB  GLU X 142     191.410 200.019 309.579  0.00  0.00           C  
ATOM   2290  CG  GLU X 142     190.810 200.528 310.901  0.00  0.00           C  
ATOM   2291  CD  GLU X 142     191.884 200.696 311.970  0.00  0.00           C  
ATOM   2292  OE1 GLU X 142     191.473 201.161 313.023  0.00  0.00           O  
ATOM   2293  OE2 GLU X 142     193.060 200.269 311.851  0.00  0.00           O1-
ATOM   2294  H   GLU X 142     193.941 200.178 309.767  0.00  0.00           H  
ATOM   2295  HA  GLU X 142     192.168 200.744 307.681  0.00  0.00           H  
ATOM   2296  HB2 GLU X 142     190.495 200.040 308.987  0.00  0.00           H  
ATOM   2297  HB3 GLU X 142     191.827 199.012 309.610  0.00  0.00           H  
ATOM   2298  HG2 GLU X 142     190.404 201.493 310.596  0.00  0.00           H  
ATOM   2299  HG3 GLU X 142     189.997 199.878 311.224  0.00  0.00           H  
ATOM   2300  N   ASP X 143     192.588 203.311 309.702  0.00  0.00           N  
ATOM   2301  CA  ASP X 143     192.259 204.766 309.650  0.00  0.00           C  
ATOM   2302  C   ASP X 143     193.028 205.529 308.591  0.00  0.00           C  
ATOM   2303  O   ASP X 143     192.579 206.623 308.241  0.00  0.00           O  
ATOM   2304  CB  ASP X 143     192.460 205.384 311.075  0.00  0.00           C  
ATOM   2305  CG  ASP X 143     191.858 204.700 312.302  0.00  0.00           C  
ATOM   2306  OD1 ASP X 143     192.431 204.818 313.397  0.00  0.00           O  
ATOM   2307  OD2 ASP X 143     191.037 203.765 312.186  0.00  0.00           O1-
ATOM   2308  H   ASP X 143     193.271 203.058 310.402  0.00  0.00           H  
ATOM   2309  HA  ASP X 143     191.212 204.836 309.355  0.00  0.00           H  
ATOM   2310  HB2 ASP X 143     193.532 205.458 311.257  0.00  0.00           H  
ATOM   2311  HB3 ASP X 143     192.166 206.434 311.081  0.00  0.00           H  
ATOM   2312  N   ARG X 144     194.148 204.938 308.077  0.00  0.00           N  
ATOM   2313  CA  ARG X 144     194.819 205.409 306.839  0.00  0.00           C  
ATOM   2314  C   ARG X 144     193.890 205.327 305.688  0.00  0.00           C  
ATOM   2315  O   ARG X 144     193.832 206.243 304.813  0.00  0.00           O  
ATOM   2316  CB  ARG X 144     196.149 204.735 306.600  0.00  0.00           C  
ATOM   2317  CG  ARG X 144     197.037 204.795 307.827  0.00  0.00           C  
ATOM   2318  CD  ARG X 144     198.546 204.580 307.611  0.00  0.00           C  
ATOM   2319  NE  ARG X 144     199.263 204.217 308.865  0.00  0.00           N  
ATOM   2320  CZ  ARG X 144     200.603 204.129 309.049  0.00  0.00           C  
ATOM   2321  NH1 ARG X 144     201.493 204.504 308.132  0.00  0.00           N1+
ATOM   2322  NH2 ARG X 144     201.153 203.667 310.130  0.00  0.00           N  
ATOM   2323  H   ARG X 144     194.446 204.123 308.594  0.00  0.00           H  
ATOM   2324  HA  ARG X 144     195.001 206.478 306.958  0.00  0.00           H  
ATOM   2325  HB2 ARG X 144     196.058 203.705 306.255  0.00  0.00           H  
ATOM   2326  HB3 ARG X 144     196.744 205.237 305.838  0.00  0.00           H  
ATOM   2327  HG2 ARG X 144     197.006 205.761 308.331  0.00  0.00           H  
ATOM   2328  HG3 ARG X 144     196.818 204.063 308.604  0.00  0.00           H  
ATOM   2329  HD2 ARG X 144     198.601 203.799 306.852  0.00  0.00           H  
ATOM   2330  HD3 ARG X 144     199.174 205.342 307.149  0.00  0.00           H  
ATOM   2331  HE  ARG X 144     198.679 204.115 309.682  0.00  0.00           H  
ATOM   2332 HH11 ARG X 144     201.048 204.928 307.330  0.00  0.00           H  
ATOM   2333 HH12 ARG X 144     202.487 204.438 308.294  0.00  0.00           H  
ATOM   2334 HH21 ARG X 144     200.602 203.149 310.799  0.00  0.00           H  
ATOM   2335 HH22 ARG X 144     202.159 203.678 310.220  0.00  0.00           H  
ATOM   2336  N   VAL X 145     193.145 204.199 305.607  0.00  0.00           N  
ATOM   2337  CA  VAL X 145     192.187 203.886 304.503  0.00  0.00           C  
ATOM   2338  C   VAL X 145     190.911 204.698 304.652  0.00  0.00           C  
ATOM   2339  O   VAL X 145     190.334 205.079 303.584  0.00  0.00           O  
ATOM   2340  CB  VAL X 145     191.743 202.376 304.537  0.00  0.00           C  
ATOM   2341  CG1 VAL X 145     190.781 202.091 303.338  0.00  0.00           C  
ATOM   2342  CG2 VAL X 145     192.857 201.337 304.408  0.00  0.00           C  
ATOM   2343  H   VAL X 145     193.222 203.440 306.268  0.00  0.00           H  
ATOM   2344  HA  VAL X 145     192.600 203.941 303.495  0.00  0.00           H  
ATOM   2345  HB  VAL X 145     191.179 202.210 305.455  0.00  0.00           H  
ATOM   2346 HG11 VAL X 145     190.583 201.028 303.200  0.00  0.00           H  
ATOM   2347 HG12 VAL X 145     189.790 202.537 303.420  0.00  0.00           H  
ATOM   2348 HG13 VAL X 145     191.261 202.468 302.434  0.00  0.00           H  
ATOM   2349 HG21 VAL X 145     192.451 200.327 304.361  0.00  0.00           H  
ATOM   2350 HG22 VAL X 145     193.573 201.380 305.229  0.00  0.00           H  
ATOM   2351 HG23 VAL X 145     193.462 201.570 303.532  0.00  0.00           H  
ATOM   2352  N   GLN X 146     190.501 205.008 305.857  0.00  0.00           N  
ATOM   2353  CA  GLN X 146     189.254 205.784 306.101  0.00  0.00           C  
ATOM   2354  C   GLN X 146     189.543 207.300 305.893  0.00  0.00           C  
ATOM   2355  O   GLN X 146     188.775 208.063 305.365  0.00  0.00           O  
ATOM   2356  CB  GLN X 146     188.708 205.606 307.478  0.00  0.00           C  
ATOM   2357  CG  GLN X 146     187.312 206.218 307.490  0.00  0.00           C  
ATOM   2358  CD  GLN X 146     186.332 205.485 308.427  0.00  0.00           C  
ATOM   2359  NE2 GLN X 146     186.207 204.209 308.250  0.00  0.00           N  
ATOM   2360  OE1 GLN X 146     185.608 206.099 309.123  0.00  0.00           O  
ATOM   2361  H   GLN X 146     190.959 204.543 306.628  0.00  0.00           H  
ATOM   2362  HA  GLN X 146     188.584 205.483 305.297  0.00  0.00           H  
ATOM   2363  HB2 GLN X 146     188.648 204.526 307.612  0.00  0.00           H  
ATOM   2364  HB3 GLN X 146     189.354 206.043 308.239  0.00  0.00           H  
ATOM   2365  HG2 GLN X 146     187.363 207.264 307.794  0.00  0.00           H  
ATOM   2366  HG3 GLN X 146     186.949 206.178 306.463  0.00  0.00           H  
ATOM   2367 HE21 GLN X 146     185.543 203.790 308.885  0.00  0.00           H  
ATOM   2368 HE22 GLN X 146     186.715 203.706 307.536  0.00  0.00           H  
ATOM   2369  N   GLU X 147     190.682 207.819 306.338  0.00  0.00           N  
ATOM   2370  CA  GLU X 147     191.257 209.186 305.923  0.00  0.00           C  
ATOM   2371  C   GLU X 147     191.103 209.450 304.429  0.00  0.00           C  
ATOM   2372  O   GLU X 147     190.492 210.468 304.025  0.00  0.00           O  
ATOM   2373  CB  GLU X 147     192.753 209.324 306.426  0.00  0.00           C  
ATOM   2374  CG  GLU X 147     193.476 210.642 306.098  0.00  0.00           C  
ATOM   2375  CD  GLU X 147     192.840 211.966 306.505  0.00  0.00           C  
ATOM   2376  OE1 GLU X 147     192.910 212.980 305.752  0.00  0.00           O  
ATOM   2377  OE2 GLU X 147     192.267 212.134 307.635  0.00  0.00           O1-
ATOM   2378  H   GLU X 147     191.307 207.190 306.823  0.00  0.00           H  
ATOM   2379  HA  GLU X 147     190.586 209.884 306.425  0.00  0.00           H  
ATOM   2380  HB2 GLU X 147     192.722 209.278 307.514  0.00  0.00           H  
ATOM   2381  HB3 GLU X 147     193.380 208.480 306.138  0.00  0.00           H  
ATOM   2382  HG2 GLU X 147     194.463 210.605 306.560  0.00  0.00           H  
ATOM   2383  HG3 GLU X 147     193.611 210.716 305.019  0.00  0.00           H  
ATOM   2384  N   GLU X 148     191.588 208.603 303.600  0.00  0.00           N  
ATOM   2385  CA  GLU X 148     191.570 208.817 302.158  0.00  0.00           C  
ATOM   2386  C   GLU X 148     190.088 208.614 301.580  0.00  0.00           C  
ATOM   2387  O   GLU X 148     189.745 209.206 300.546  0.00  0.00           O  
ATOM   2388  CB  GLU X 148     192.554 207.871 301.461  0.00  0.00           C  
ATOM   2389  CG  GLU X 148     194.024 207.990 301.833  0.00  0.00           C  
ATOM   2390  CD  GLU X 148     194.426 209.478 301.929  0.00  0.00           C  
ATOM   2391  OE1 GLU X 148     194.056 210.343 301.093  0.00  0.00           O  
ATOM   2392  OE2 GLU X 148     195.180 209.760 302.866  0.00  0.00           O1-
ATOM   2393  H   GLU X 148     191.984 207.729 303.916  0.00  0.00           H  
ATOM   2394  HA  GLU X 148     191.851 209.857 301.993  0.00  0.00           H  
ATOM   2395  HB2 GLU X 148     192.192 206.846 301.545  0.00  0.00           H  
ATOM   2396  HB3 GLU X 148     192.479 208.131 300.405  0.00  0.00           H  
ATOM   2397  HG2 GLU X 148     194.105 207.519 302.813  0.00  0.00           H  
ATOM   2398  HG3 GLU X 148     194.685 207.475 301.137  0.00  0.00           H  
ATOM   2399  N   ALA X 149     189.299 207.699 302.188  0.00  0.00           N  
ATOM   2400  CA  ALA X 149     187.902 207.404 301.865  0.00  0.00           C  
ATOM   2401  C   ALA X 149     187.062 208.670 302.054  0.00  0.00           C  
ATOM   2402  O   ALA X 149     186.291 209.068 301.149  0.00  0.00           O  
ATOM   2403  CB  ALA X 149     187.307 206.195 302.559  0.00  0.00           C  
ATOM   2404  H   ALA X 149     189.662 207.231 303.006  0.00  0.00           H  
ATOM   2405  HA  ALA X 149     187.867 207.193 300.797  0.00  0.00           H  
ATOM   2406  HB1 ALA X 149     186.245 206.073 302.347  0.00  0.00           H  
ATOM   2407  HB2 ALA X 149     187.282 206.295 303.644  0.00  0.00           H  
ATOM   2408  HB3 ALA X 149     187.825 205.255 302.372  0.00  0.00           H  
ATOM   2409  N   ARG X 150     187.191 209.368 303.176  0.00  0.00           N  
ATOM   2410  CA  ARG X 150     186.582 210.662 303.420  0.00  0.00           C  
ATOM   2411  C   ARG X 150     187.036 211.728 302.468  0.00  0.00           C  
ATOM   2412  O   ARG X 150     186.172 212.420 301.892  0.00  0.00           O  
ATOM   2413  CB  ARG X 150     186.921 211.064 304.941  0.00  0.00           C  
ATOM   2414  CG  ARG X 150     186.050 212.184 305.447  0.00  0.00           C  
ATOM   2415  CD  ARG X 150     186.785 213.071 306.440  0.00  0.00           C  
ATOM   2416  NE  ARG X 150     187.984 213.680 305.802  0.00  0.00           N  
ATOM   2417  CZ  ARG X 150     189.219 213.470 306.172  0.00  0.00           C  
ATOM   2418  NH1 ARG X 150     189.531 212.774 307.255  0.00  0.00           N1+
ATOM   2419  NH2 ARG X 150     190.229 214.057 305.541  0.00  0.00           N  
ATOM   2420  H   ARG X 150     187.832 209.031 303.880  0.00  0.00           H  
ATOM   2421  HA  ARG X 150     185.494 210.604 303.383  0.00  0.00           H  
ATOM   2422  HB2 ARG X 150     186.620 210.273 305.629  0.00  0.00           H  
ATOM   2423  HB3 ARG X 150     187.990 211.222 305.083  0.00  0.00           H  
ATOM   2424  HG2 ARG X 150     185.758 212.708 304.537  0.00  0.00           H  
ATOM   2425  HG3 ARG X 150     185.119 211.833 305.892  0.00  0.00           H  
ATOM   2426  HD2 ARG X 150     186.052 213.774 306.835  0.00  0.00           H  
ATOM   2427  HD3 ARG X 150     187.117 212.495 307.305  0.00  0.00           H  
ATOM   2428  HE  ARG X 150     187.930 214.314 305.018  0.00  0.00           H  
ATOM   2429 HH11 ARG X 150     188.875 212.208 307.775  0.00  0.00           H  
ATOM   2430 HH12 ARG X 150     190.497 212.646 307.519  0.00  0.00           H  
ATOM   2431 HH21 ARG X 150     190.029 214.527 304.669  0.00  0.00           H  
ATOM   2432 HH22 ARG X 150     191.183 213.856 305.806  0.00  0.00           H  
ATOM   2433  N   CYS X 151     188.346 211.806 302.219  0.00  0.00           N  
ATOM   2434  CA  CYS X 151     188.893 212.621 301.068  0.00  0.00           C  
ATOM   2435  C   CYS X 151     188.268 212.262 299.747  0.00  0.00           C  
ATOM   2436  O   CYS X 151     187.997 213.172 298.926  0.00  0.00           O  
ATOM   2437  CB  CYS X 151     190.420 212.630 301.029  0.00  0.00           C  
ATOM   2438  SG  CYS X 151     190.996 213.343 302.575  0.00  0.00           S  
ATOM   2439  H   CYS X 151     188.884 211.120 302.729  0.00  0.00           H  
ATOM   2440  HA  CYS X 151     188.694 213.683 301.208  0.00  0.00           H  
ATOM   2441  HB2 CYS X 151     190.915 211.661 300.956  0.00  0.00           H  
ATOM   2442  HB3 CYS X 151     190.732 213.331 300.256  0.00  0.00           H  
ATOM   2443  HG  CYS X 151     190.913 212.158 303.185  0.00  0.00           H  
ATOM   2444  N   LEU X 152     187.998 211.006 299.388  0.00  0.00           N  
ATOM   2445  CA  LEU X 152     187.310 210.644 298.125  0.00  0.00           C  
ATOM   2446  C   LEU X 152     185.945 211.243 298.055  0.00  0.00           C  
ATOM   2447  O   LEU X 152     185.612 211.669 296.960  0.00  0.00           O  
ATOM   2448  CB  LEU X 152     187.478 209.119 297.952  0.00  0.00           C  
ATOM   2449  CG  LEU X 152     186.625 208.581 296.732  0.00  0.00           C  
ATOM   2450  CD1 LEU X 152     187.223 209.070 295.389  0.00  0.00           C  
ATOM   2451  CD2 LEU X 152     186.534 207.014 296.794  0.00  0.00           C  
ATOM   2452  H   LEU X 152     188.510 210.221 299.763  0.00  0.00           H  
ATOM   2453  HA  LEU X 152     187.922 211.025 297.307  0.00  0.00           H  
ATOM   2454  HB2 LEU X 152     188.545 208.912 297.871  0.00  0.00           H  
ATOM   2455  HB3 LEU X 152     187.137 208.641 298.871  0.00  0.00           H  
ATOM   2456  HG  LEU X 152     185.601 208.949 296.786  0.00  0.00           H  
ATOM   2457 HD11 LEU X 152     186.973 210.127 295.294  0.00  0.00           H  
ATOM   2458 HD12 LEU X 152     186.830 208.529 294.528  0.00  0.00           H  
ATOM   2459 HD13 LEU X 152     188.291 208.854 295.400  0.00  0.00           H  
ATOM   2460 HD21 LEU X 152     185.911 206.733 295.944  0.00  0.00           H  
ATOM   2461 HD22 LEU X 152     187.531 206.574 296.783  0.00  0.00           H  
ATOM   2462 HD23 LEU X 152     185.825 206.682 297.552  0.00  0.00           H  
ATOM   2463  N   VAL X 153     185.144 211.105 299.114  0.00  0.00           N  
ATOM   2464  CA  VAL X 153     183.747 211.651 299.017  0.00  0.00           C  
ATOM   2465  C   VAL X 153     183.662 213.191 299.021  0.00  0.00           C  
ATOM   2466  O   VAL X 153     182.684 213.842 298.517  0.00  0.00           O  
ATOM   2467  CB  VAL X 153     182.746 211.026 299.948  0.00  0.00           C  
ATOM   2468  CG1 VAL X 153     182.587 209.512 299.789  0.00  0.00           C  
ATOM   2469  CG2 VAL X 153     183.006 211.340 301.408  0.00  0.00           C  
ATOM   2470  H   VAL X 153     185.489 210.785 300.008  0.00  0.00           H  
ATOM   2471  HA  VAL X 153     183.263 211.473 298.057  0.00  0.00           H  
ATOM   2472  HB  VAL X 153     181.772 211.443 299.690  0.00  0.00           H  
ATOM   2473 HG11 VAL X 153     182.515 209.173 298.756  0.00  0.00           H  
ATOM   2474 HG12 VAL X 153     183.412 208.939 300.215  0.00  0.00           H  
ATOM   2475 HG13 VAL X 153     181.691 209.207 300.330  0.00  0.00           H  
ATOM   2476 HG21 VAL X 153     182.981 212.427 301.491  0.00  0.00           H  
ATOM   2477 HG22 VAL X 153     183.809 210.771 301.877  0.00  0.00           H  
ATOM   2478 HG23 VAL X 153     182.110 210.932 301.877  0.00  0.00           H  
ATOM   2479  N   GLU X 154     184.683 213.859 299.559  0.00  0.00           N  
ATOM   2480  CA  GLU X 154     184.982 215.313 299.361  0.00  0.00           C  
ATOM   2481  C   GLU X 154     185.171 215.609 297.856  0.00  0.00           C  
ATOM   2482  O   GLU X 154     184.718 216.667 297.342  0.00  0.00           O  
ATOM   2483  CB  GLU X 154     186.237 215.713 300.160  0.00  0.00           C  
ATOM   2484  CG  GLU X 154     186.319 217.153 300.676  0.00  0.00           C  
ATOM   2485  CD  GLU X 154     185.077 217.480 301.456  0.00  0.00           C  
ATOM   2486  OE1 GLU X 154     185.153 217.350 302.685  0.00  0.00           O  
ATOM   2487  OE2 GLU X 154     184.023 217.908 300.943  0.00  0.00           O1-
ATOM   2488  H   GLU X 154     185.440 213.282 299.897  0.00  0.00           H  
ATOM   2489  HA  GLU X 154     184.130 215.873 299.747  0.00  0.00           H  
ATOM   2490  HB2 GLU X 154     186.344 215.012 300.988  0.00  0.00           H  
ATOM   2491  HB3 GLU X 154     187.096 215.578 299.502  0.00  0.00           H  
ATOM   2492  HG2 GLU X 154     187.200 217.276 301.306  0.00  0.00           H  
ATOM   2493  HG3 GLU X 154     186.488 217.797 299.813  0.00  0.00           H  
ATOM   2494  N   GLU X 155     185.839 214.739 297.105  0.00  0.00           N  
ATOM   2495  CA  GLU X 155     186.116 214.940 295.699  0.00  0.00           C  
ATOM   2496  C   GLU X 155     184.937 214.403 294.883  0.00  0.00           C  
ATOM   2497  O   GLU X 155     184.618 215.077 293.880  0.00  0.00           O  
ATOM   2498  CB  GLU X 155     187.338 214.139 295.215  0.00  0.00           C  
ATOM   2499  CG  GLU X 155     188.152 214.860 294.148  0.00  0.00           C  
ATOM   2500  CD  GLU X 155     188.615 216.312 294.474  0.00  0.00           C  
ATOM   2501  OE1 GLU X 155     188.514 216.702 295.643  0.00  0.00           O  
ATOM   2502  OE2 GLU X 155     188.934 217.063 293.504  0.00  0.00           O1-
ATOM   2503  H   GLU X 155     186.343 214.038 297.629  0.00  0.00           H  
ATOM   2504  HA  GLU X 155     186.167 215.994 295.423  0.00  0.00           H  
ATOM   2505  HB2 GLU X 155     187.993 214.012 296.077  0.00  0.00           H  
ATOM   2506  HB3 GLU X 155     187.011 213.203 294.763  0.00  0.00           H  
ATOM   2507  HG2 GLU X 155     189.032 214.249 293.946  0.00  0.00           H  
ATOM   2508  HG3 GLU X 155     187.575 214.952 293.228  0.00  0.00           H  
ATOM   2509  N   LEU X 156     184.161 213.426 295.331  0.00  0.00           N  
ATOM   2510  CA  LEU X 156     182.959 212.937 294.619  0.00  0.00           C  
ATOM   2511  C   LEU X 156     181.789 213.920 294.579  0.00  0.00           C  
ATOM   2512  O   LEU X 156     181.059 213.906 293.584  0.00  0.00           O  
ATOM   2513  CB  LEU X 156     182.597 211.510 295.043  0.00  0.00           C  
ATOM   2514  CG  LEU X 156     183.651 210.511 294.527  0.00  0.00           C  
ATOM   2515  CD1 LEU X 156     183.411 209.146 295.112  0.00  0.00           C  
ATOM   2516  CD2 LEU X 156     183.707 210.384 292.968  0.00  0.00           C  
ATOM   2517  H   LEU X 156     184.450 212.807 296.075  0.00  0.00           H  
ATOM   2518  HA  LEU X 156     183.227 212.882 293.564  0.00  0.00           H  
ATOM   2519  HB2 LEU X 156     182.578 211.471 296.132  0.00  0.00           H  
ATOM   2520  HB3 LEU X 156     181.624 211.243 294.633  0.00  0.00           H  
ATOM   2521  HG  LEU X 156     184.636 210.815 294.882  0.00  0.00           H  
ATOM   2522 HD11 LEU X 156     183.424 209.202 296.200  0.00  0.00           H  
ATOM   2523 HD12 LEU X 156     184.139 208.391 294.816  0.00  0.00           H  
ATOM   2524 HD13 LEU X 156     182.458 208.810 294.704  0.00  0.00           H  
ATOM   2525 HD21 LEU X 156     184.496 209.675 292.716  0.00  0.00           H  
ATOM   2526 HD22 LEU X 156     182.751 210.062 292.555  0.00  0.00           H  
ATOM   2527 HD23 LEU X 156     183.939 211.265 292.369  0.00  0.00           H  
ATOM   2528  N   ARG X 157     181.562 214.739 295.633  0.00  0.00           N  
ATOM   2529  CA  ARG X 157     180.663 215.925 295.559  0.00  0.00           C  
ATOM   2530  C   ARG X 157     181.148 217.127 294.740  0.00  0.00           C  
ATOM   2531  O   ARG X 157     180.278 217.826 294.263  0.00  0.00           O  
ATOM   2532  CB  ARG X 157     180.344 216.401 296.996  0.00  0.00           C  
ATOM   2533  CG  ARG X 157     181.500 216.898 297.774  0.00  0.00           C  
ATOM   2534  CD  ARG X 157     181.198 217.262 299.226  0.00  0.00           C  
ATOM   2535  NE  ARG X 157     180.594 216.151 299.973  0.00  0.00           N  
ATOM   2536  CZ  ARG X 157     181.146 215.451 300.944  0.00  0.00           C  
ATOM   2537  NH1 ARG X 157     182.229 215.840 301.599  0.00  0.00           N1+
ATOM   2538  NH2 ARG X 157     180.515 214.291 301.355  0.00  0.00           N  
ATOM   2539  H   ARG X 157     182.046 214.530 296.494  0.00  0.00           H  
ATOM   2540  HA  ARG X 157     179.702 215.617 295.148  0.00  0.00           H  
ATOM   2541  HB2 ARG X 157     179.524 217.113 296.910  0.00  0.00           H  
ATOM   2542  HB3 ARG X 157     179.909 215.547 297.514  0.00  0.00           H  
ATOM   2543  HG2 ARG X 157     182.288 216.145 297.801  0.00  0.00           H  
ATOM   2544  HG3 ARG X 157     181.944 217.789 297.331  0.00  0.00           H  
ATOM   2545  HD2 ARG X 157     182.048 217.744 299.709  0.00  0.00           H  
ATOM   2546  HD3 ARG X 157     180.488 218.088 299.170  0.00  0.00           H  
ATOM   2547  HE  ARG X 157     179.767 215.719 299.587  0.00  0.00           H  
ATOM   2548 HH11 ARG X 157     182.539 216.796 301.497  0.00  0.00           H  
ATOM   2549 HH12 ARG X 157     182.777 215.126 302.056  0.00  0.00           H  
ATOM   2550 HH21 ARG X 157     179.628 213.920 301.045  0.00  0.00           H  
ATOM   2551 HH22 ARG X 157     180.956 213.833 302.139  0.00  0.00           H  
ATOM   2552  N   LYS X 158     182.449 217.379 294.482  0.00  0.00           N  
ATOM   2553  CA  LYS X 158     182.986 218.327 293.486  0.00  0.00           C  
ATOM   2554  C   LYS X 158     182.664 217.985 292.018  0.00  0.00           C  
ATOM   2555  O   LYS X 158     182.829 218.787 291.076  0.00  0.00           O  
ATOM   2556  CB  LYS X 158     184.487 218.625 293.598  0.00  0.00           C  
ATOM   2557  CG  LYS X 158     184.809 219.192 294.983  0.00  0.00           C  
ATOM   2558  CD  LYS X 158     186.341 219.251 295.146  0.00  0.00           C  
ATOM   2559  CE  LYS X 158     186.796 219.476 296.539  0.00  0.00           C  
ATOM   2560  NZ  LYS X 158     188.266 219.348 296.572  0.00  0.00           N1+
ATOM   2561  H   LYS X 158     183.048 217.022 295.214  0.00  0.00           H  
ATOM   2562  HA  LYS X 158     182.390 219.236 293.568  0.00  0.00           H  
ATOM   2563  HB2 LYS X 158     185.151 217.762 293.538  0.00  0.00           H  
ATOM   2564  HB3 LYS X 158     184.841 219.214 292.753  0.00  0.00           H  
ATOM   2565  HG2 LYS X 158     184.407 220.204 295.030  0.00  0.00           H  
ATOM   2566  HG3 LYS X 158     184.308 218.665 295.795  0.00  0.00           H  
ATOM   2567  HD2 LYS X 158     186.708 218.232 295.020  0.00  0.00           H  
ATOM   2568  HD3 LYS X 158     186.779 219.884 294.375  0.00  0.00           H  
ATOM   2569  HE2 LYS X 158     186.474 220.445 296.920  0.00  0.00           H  
ATOM   2570  HE3 LYS X 158     186.242 218.682 297.040  0.00  0.00           H  
ATOM   2571  HZ1 LYS X 158     188.564 218.439 296.250  0.00  0.00           H  
ATOM   2572  HZ2 LYS X 158     188.622 219.433 297.513  0.00  0.00           H  
ATOM   2573  HZ3 LYS X 158     188.721 220.053 296.010  0.00  0.00           H  
ATOM   2574  N   THR X 159     182.007 216.812 291.784  0.00  0.00           N  
ATOM   2575  CA  THR X 159     181.371 216.502 290.439  0.00  0.00           C  
ATOM   2576  C   THR X 159     179.916 217.045 290.352  0.00  0.00           C  
ATOM   2577  O   THR X 159     179.388 217.167 289.271  0.00  0.00           O  
ATOM   2578  CB  THR X 159     181.312 215.006 290.195  0.00  0.00           C  
ATOM   2579  CG2 THR X 159     182.613 214.146 290.445  0.00  0.00           C  
ATOM   2580  OG1 THR X 159     180.390 214.474 291.043  0.00  0.00           O  
ATOM   2581  H   THR X 159     181.973 216.158 292.553  0.00  0.00           H  
ATOM   2582  HA  THR X 159     181.895 216.925 289.581  0.00  0.00           H  
ATOM   2583  HB  THR X 159     180.846 214.783 289.235  0.00  0.00           H  
ATOM   2584  HG1 THR X 159     180.972 214.115 291.717  0.00  0.00           H  
ATOM   2585 HG21 THR X 159     182.871 213.953 291.487  0.00  0.00           H  
ATOM   2586 HG22 THR X 159     183.424 214.784 290.093  0.00  0.00           H  
ATOM   2587 HG23 THR X 159     182.757 213.306 289.766  0.00  0.00           H  
ATOM   2588  N   LYS X 160     179.297 217.413 291.465  0.00  0.00           N  
ATOM   2589  CA  LYS X 160     177.914 217.961 291.484  0.00  0.00           C  
ATOM   2590  C   LYS X 160     176.869 217.112 290.747  0.00  0.00           C  
ATOM   2591  O   LYS X 160     176.020 217.786 290.089  0.00  0.00           O  
ATOM   2592  CB  LYS X 160     178.063 219.448 291.093  0.00  0.00           C  
ATOM   2593  CG  LYS X 160     176.990 220.322 291.717  0.00  0.00           C  
ATOM   2594  CD  LYS X 160     176.983 221.676 290.984  0.00  0.00           C  
ATOM   2595  CE  LYS X 160     178.427 222.289 291.072  0.00  0.00           C  
ATOM   2596  NZ  LYS X 160     178.454 223.577 290.405  0.00  0.00           N1+
ATOM   2597  H   LYS X 160     179.845 217.508 292.307  0.00  0.00           H  
ATOM   2598  HA  LYS X 160     177.591 217.874 292.521  0.00  0.00           H  
ATOM   2599  HB2 LYS X 160     178.984 219.898 291.464  0.00  0.00           H  
ATOM   2600  HB3 LYS X 160     177.971 219.635 290.024  0.00  0.00           H  
ATOM   2601  HG2 LYS X 160     176.010 219.855 291.621  0.00  0.00           H  
ATOM   2602  HG3 LYS X 160     177.298 220.554 292.737  0.00  0.00           H  
ATOM   2603  HD2 LYS X 160     176.710 221.495 289.944  0.00  0.00           H  
ATOM   2604  HD3 LYS X 160     176.136 222.196 291.432  0.00  0.00           H  
ATOM   2605  HE2 LYS X 160     178.868 222.287 292.069  0.00  0.00           H  
ATOM   2606  HE3 LYS X 160     179.139 221.702 290.492  0.00  0.00           H  
ATOM   2607  HZ1 LYS X 160     177.757 224.199 290.787  0.00  0.00           H  
ATOM   2608  HZ2 LYS X 160     178.321 223.551 289.404  0.00  0.00           H  
ATOM   2609  HZ3 LYS X 160     179.342 224.040 290.532  0.00  0.00           H  
ATOM   2610  N   ALA X 161     176.777 215.793 290.819  0.00  0.00           N  
ATOM   2611  CA  ALA X 161     175.789 214.997 290.111  0.00  0.00           C  
ATOM   2612  C   ALA X 161     175.931 214.968 288.615  0.00  0.00           C  
ATOM   2613  O   ALA X 161     175.264 214.169 287.954  0.00  0.00           O  
ATOM   2614  CB  ALA X 161     174.392 215.172 290.655  0.00  0.00           C  
ATOM   2615  H   ALA X 161     177.373 215.266 291.441  0.00  0.00           H  
ATOM   2616  HA  ALA X 161     176.076 214.001 290.448  0.00  0.00           H  
ATOM   2617  HB1 ALA X 161     173.686 214.461 290.226  0.00  0.00           H  
ATOM   2618  HB2 ALA X 161     174.095 216.187 290.392  0.00  0.00           H  
ATOM   2619  HB3 ALA X 161     174.358 215.006 291.732  0.00  0.00           H  
ATOM   2620  N   SER X 162     176.816 215.768 287.937  0.00  0.00           N  
ATOM   2621  CA  SER X 162     177.270 215.584 286.583  0.00  0.00           C  
ATOM   2622  C   SER X 162     177.858 214.233 286.317  0.00  0.00           C  
ATOM   2623  O   SER X 162     178.475 213.664 287.189  0.00  0.00           O  
ATOM   2624  CB  SER X 162     178.285 216.587 286.127  0.00  0.00           C  
ATOM   2625  OG  SER X 162     177.892 217.967 286.268  0.00  0.00           O  
ATOM   2626  H   SER X 162     177.311 216.288 288.648  0.00  0.00           H  
ATOM   2627  HA  SER X 162     176.441 215.741 285.893  0.00  0.00           H  
ATOM   2628  HB2 SER X 162     179.115 216.395 286.808  0.00  0.00           H  
ATOM   2629  HB3 SER X 162     178.647 216.370 285.122  0.00  0.00           H  
ATOM   2630  HG  SER X 162     177.664 218.167 287.179  0.00  0.00           H  
ATOM   2631  N   PRO X 163     177.747 213.648 285.119  0.00  0.00           N  
ATOM   2632  CA  PRO X 163     178.336 212.437 284.725  0.00  0.00           C  
ATOM   2633  C   PRO X 163     179.880 212.600 284.505  0.00  0.00           C  
ATOM   2634  O   PRO X 163     180.358 213.544 283.847  0.00  0.00           O  
ATOM   2635  CB  PRO X 163     177.496 211.894 283.593  0.00  0.00           C  
ATOM   2636  CG  PRO X 163     176.871 213.124 282.931  0.00  0.00           C  
ATOM   2637  CD  PRO X 163     176.820 214.119 284.068  0.00  0.00           C  
ATOM   2638  HA  PRO X 163     178.148 211.784 285.577  0.00  0.00           H  
ATOM   2639  HB2 PRO X 163     178.132 211.381 282.871  0.00  0.00           H  
ATOM   2640  HB3 PRO X 163     176.733 211.191 283.925  0.00  0.00           H  
ATOM   2641  HG2 PRO X 163     177.576 213.470 282.175  0.00  0.00           H  
ATOM   2642  HG3 PRO X 163     175.856 213.069 282.539  0.00  0.00           H  
ATOM   2643  HD2 PRO X 163     177.153 215.081 283.678  0.00  0.00           H  
ATOM   2644  HD3 PRO X 163     175.827 214.152 284.516  0.00  0.00           H  
ATOM   2645  N   CYS X 164     180.626 211.698 285.035  0.00  0.00           N  
ATOM   2646  CA  CYS X 164     182.079 211.815 285.054  0.00  0.00           C  
ATOM   2647  C   CYS X 164     182.735 210.428 284.791  0.00  0.00           C  
ATOM   2648  O   CYS X 164     182.260 209.355 285.075  0.00  0.00           O  
ATOM   2649  CB  CYS X 164     182.510 212.425 286.351  0.00  0.00           C  
ATOM   2650  SG  CYS X 164     181.885 211.504 287.775  0.00  0.00           S  
ATOM   2651  H   CYS X 164     180.305 210.880 285.533  0.00  0.00           H  
ATOM   2652  HA  CYS X 164     182.394 212.459 284.233  0.00  0.00           H  
ATOM   2653  HB2 CYS X 164     183.597 212.427 286.427  0.00  0.00           H  
ATOM   2654  HB3 CYS X 164     182.085 213.429 286.322  0.00  0.00           H  
ATOM   2655  HG  CYS X 164     180.583 211.668 287.525  0.00  0.00           H  
ATOM   2656  N   ASP X 165     183.984 210.411 284.181  0.00  0.00           N  
ATOM   2657  CA  ASP X 165     184.901 209.255 284.210  0.00  0.00           C  
ATOM   2658  C   ASP X 165     185.591 209.223 285.564  0.00  0.00           C  
ATOM   2659  O   ASP X 165     186.333 210.192 285.759  0.00  0.00           O  
ATOM   2660  CB  ASP X 165     185.955 209.133 283.069  0.00  0.00           C  
ATOM   2661  CG  ASP X 165     186.851 207.923 283.022  0.00  0.00           C  
ATOM   2662  OD1 ASP X 165     187.750 207.872 282.135  0.00  0.00           O  
ATOM   2663  OD2 ASP X 165     186.613 206.981 283.819  0.00  0.00           O1-
ATOM   2664  H   ASP X 165     184.417 211.322 284.138  0.00  0.00           H  
ATOM   2665  HA  ASP X 165     184.257 208.384 284.088  0.00  0.00           H  
ATOM   2666  HB2 ASP X 165     185.471 209.222 282.097  0.00  0.00           H  
ATOM   2667  HB3 ASP X 165     186.557 210.039 283.139  0.00  0.00           H  
ATOM   2668  N   PRO X 166     185.358 208.283 286.520  0.00  0.00           N  
ATOM   2669  CA  PRO X 166     185.926 208.466 287.861  0.00  0.00           C  
ATOM   2670  C   PRO X 166     187.374 207.926 288.035  0.00  0.00           C  
ATOM   2671  O   PRO X 166     187.916 207.885 289.157  0.00  0.00           O  
ATOM   2672  CB  PRO X 166     185.010 207.651 288.715  0.00  0.00           C  
ATOM   2673  CG  PRO X 166     184.589 206.562 287.795  0.00  0.00           C  
ATOM   2674  CD  PRO X 166     184.329 207.298 286.490  0.00  0.00           C  
ATOM   2675  HA  PRO X 166     185.988 209.494 288.219  0.00  0.00           H  
ATOM   2676  HB2 PRO X 166     185.535 207.318 289.610  0.00  0.00           H  
ATOM   2677  HB3 PRO X 166     184.148 208.275 288.949  0.00  0.00           H  
ATOM   2678  HG2 PRO X 166     185.377 205.810 287.826  0.00  0.00           H  
ATOM   2679  HG3 PRO X 166     183.663 206.161 288.207  0.00  0.00           H  
ATOM   2680  HD2 PRO X 166     184.415 206.665 285.607  0.00  0.00           H  
ATOM   2681  HD3 PRO X 166     183.317 207.694 286.569  0.00  0.00           H  
ATOM   2682  N   THR X 167     188.001 207.507 286.943  0.00  0.00           N  
ATOM   2683  CA  THR X 167     189.294 206.755 286.848  0.00  0.00           C  
ATOM   2684  C   THR X 167     190.501 207.360 287.621  0.00  0.00           C  
ATOM   2685  O   THR X 167     191.253 206.709 288.386  0.00  0.00           O  
ATOM   2686  CB  THR X 167     189.589 206.705 285.318  0.00  0.00           C  
ATOM   2687  CG2 THR X 167     190.965 206.196 284.875  0.00  0.00           C  
ATOM   2688  OG1 THR X 167     188.666 205.896 284.669  0.00  0.00           O  
ATOM   2689  H   THR X 167     187.422 207.685 286.135  0.00  0.00           H  
ATOM   2690  HA  THR X 167     189.189 205.725 287.187  0.00  0.00           H  
ATOM   2691  HB  THR X 167     189.490 207.708 284.903  0.00  0.00           H  
ATOM   2692  HG1 THR X 167     187.923 206.417 284.355  0.00  0.00           H  
ATOM   2693 HG21 THR X 167     190.962 206.017 283.800  0.00  0.00           H  
ATOM   2694 HG22 THR X 167     191.236 205.293 285.422  0.00  0.00           H  
ATOM   2695 HG23 THR X 167     191.720 206.914 285.196  0.00  0.00           H  
ATOM   2696  N   PHE X 168     190.849 208.662 287.372  0.00  0.00           N  
ATOM   2697  CA  PHE X 168     192.104 209.362 287.888  0.00  0.00           C  
ATOM   2698  C   PHE X 168     191.933 209.569 289.397  0.00  0.00           C  
ATOM   2699  O   PHE X 168     192.844 209.243 290.156  0.00  0.00           O  
ATOM   2700  CB  PHE X 168     192.164 210.794 287.418  0.00  0.00           C  
ATOM   2701  CG  PHE X 168     193.466 211.570 287.562  0.00  0.00           C  
ATOM   2702  CD1 PHE X 168     194.392 211.529 286.547  0.00  0.00           C  
ATOM   2703  CD2 PHE X 168     193.745 212.501 288.673  0.00  0.00           C  
ATOM   2704  CE1 PHE X 168     195.569 212.301 286.535  0.00  0.00           C  
ATOM   2705  CE2 PHE X 168     194.941 213.196 288.701  0.00  0.00           C  
ATOM   2706  CZ  PHE X 168     195.811 213.086 287.657  0.00  0.00           C  
ATOM   2707  H   PHE X 168     190.280 209.212 286.745  0.00  0.00           H  
ATOM   2708  HA  PHE X 168     193.012 208.798 287.673  0.00  0.00           H  
ATOM   2709  HB2 PHE X 168     191.862 210.821 286.371  0.00  0.00           H  
ATOM   2710  HB3 PHE X 168     191.449 211.392 287.983  0.00  0.00           H  
ATOM   2711  HD1 PHE X 168     194.139 210.972 285.657  0.00  0.00           H  
ATOM   2712  HD2 PHE X 168     193.021 212.561 289.473  0.00  0.00           H  
ATOM   2713  HE1 PHE X 168     196.221 212.283 285.674  0.00  0.00           H  
ATOM   2714  HE2 PHE X 168     195.176 213.784 289.576  0.00  0.00           H  
ATOM   2715  HZ  PHE X 168     196.713 213.678 287.691  0.00  0.00           H  
ATOM   2716  N   ILE X 169     190.754 209.915 289.922  0.00  0.00           N  
ATOM   2717  CA  ILE X 169     190.433 210.117 291.296  0.00  0.00           C  
ATOM   2718  C   ILE X 169     190.341 208.832 292.168  0.00  0.00           C  
ATOM   2719  O   ILE X 169     190.741 208.835 293.274  0.00  0.00           O  
ATOM   2720  CB  ILE X 169     189.236 211.199 291.413  0.00  0.00           C  
ATOM   2721  CG1 ILE X 169     189.702 212.545 290.722  0.00  0.00           C  
ATOM   2722  CG2 ILE X 169     188.668 211.503 292.778  0.00  0.00           C  
ATOM   2723  CD1 ILE X 169     190.799 213.267 291.450  0.00  0.00           C  
ATOM   2724  H   ILE X 169     190.044 210.090 289.226  0.00  0.00           H  
ATOM   2725  HA  ILE X 169     191.242 210.717 291.713  0.00  0.00           H  
ATOM   2726  HB  ILE X 169     188.423 210.735 290.854  0.00  0.00           H  
ATOM   2727 HG12 ILE X 169     189.853 212.485 289.644  0.00  0.00           H  
ATOM   2728 HG13 ILE X 169     188.859 213.236 290.737  0.00  0.00           H  
ATOM   2729 HG21 ILE X 169     189.456 211.675 293.511  0.00  0.00           H  
ATOM   2730 HG22 ILE X 169     187.988 210.732 293.139  0.00  0.00           H  
ATOM   2731 HG23 ILE X 169     187.886 212.251 292.649  0.00  0.00           H  
ATOM   2732 HD11 ILE X 169     190.764 213.125 292.530  0.00  0.00           H  
ATOM   2733 HD12 ILE X 169     190.696 214.323 291.200  0.00  0.00           H  
ATOM   2734 HD13 ILE X 169     191.789 212.863 291.240  0.00  0.00           H  
ATOM   2735  N   LEU X 170     189.857 207.681 291.599  0.00  0.00           N  
ATOM   2736  CA  LEU X 170     190.056 206.363 292.317  0.00  0.00           C  
ATOM   2737  C   LEU X 170     191.379 205.734 291.948  0.00  0.00           C  
ATOM   2738  O   LEU X 170     191.695 204.637 292.435  0.00  0.00           O  
ATOM   2739  CB  LEU X 170     189.032 205.400 291.850  0.00  0.00           C  
ATOM   2740  CG  LEU X 170     187.529 205.695 291.876  0.00  0.00           C  
ATOM   2741  CD1 LEU X 170     186.757 204.866 290.851  0.00  0.00           C  
ATOM   2742  CD2 LEU X 170     187.107 205.374 293.293  0.00  0.00           C  
ATOM   2743  H   LEU X 170     189.296 207.735 290.761  0.00  0.00           H  
ATOM   2744  HA  LEU X 170     189.955 206.525 293.390  0.00  0.00           H  
ATOM   2745  HB2 LEU X 170     189.370 205.284 290.820  0.00  0.00           H  
ATOM   2746  HB3 LEU X 170     189.129 204.390 292.248  0.00  0.00           H  
ATOM   2747  HG  LEU X 170     187.178 206.724 291.801  0.00  0.00           H  
ATOM   2748 HD11 LEU X 170     185.683 205.053 290.872  0.00  0.00           H  
ATOM   2749 HD12 LEU X 170     186.936 203.793 290.926  0.00  0.00           H  
ATOM   2750 HD13 LEU X 170     187.091 205.180 289.862  0.00  0.00           H  
ATOM   2751 HD21 LEU X 170     186.021 205.452 293.340  0.00  0.00           H  
ATOM   2752 HD22 LEU X 170     187.185 204.290 293.369  0.00  0.00           H  
ATOM   2753 HD23 LEU X 170     187.698 205.998 293.964  0.00  0.00           H  
ATOM   2754  N   GLY X 171     192.218 206.403 291.194  0.00  0.00           N  
ATOM   2755  CA  GLY X 171     193.655 206.367 291.284  0.00  0.00           C  
ATOM   2756  C   GLY X 171     194.213 207.055 292.529  0.00  0.00           C  
ATOM   2757  O   GLY X 171     195.010 206.480 293.284  0.00  0.00           O  
ATOM   2758  H   GLY X 171     191.829 207.286 290.895  0.00  0.00           H  
ATOM   2759  HA2 GLY X 171     194.034 205.346 291.225  0.00  0.00           H  
ATOM   2760  HA3 GLY X 171     193.940 207.044 290.480  0.00  0.00           H  
ATOM   2761  N   CYS X 172     193.747 208.303 292.941  0.00  0.00           N  
ATOM   2762  CA  CYS X 172     194.381 209.188 293.929  0.00  0.00           C  
ATOM   2763  C   CYS X 172     194.144 208.760 295.371  0.00  0.00           C  
ATOM   2764  O   CYS X 172     195.155 208.589 296.052  0.00  0.00           O  
ATOM   2765  CB  CYS X 172     193.909 210.666 293.779  0.00  0.00           C  
ATOM   2766  SG  CYS X 172     194.305 211.376 292.170  0.00  0.00           S  
ATOM   2767  H   CYS X 172     193.057 208.608 292.271  0.00  0.00           H  
ATOM   2768  HA  CYS X 172     195.463 209.114 293.821  0.00  0.00           H  
ATOM   2769  HB2 CYS X 172     192.856 210.797 294.027  0.00  0.00           H  
ATOM   2770  HB3 CYS X 172     194.468 211.171 294.566  0.00  0.00           H  
ATOM   2771  HG  CYS X 172     193.575 210.555 291.410  0.00  0.00           H  
ATOM   2772  N   ALA X 173     192.896 208.444 295.766  0.00  0.00           N  
ATOM   2773  CA  ALA X 173     192.625 208.068 297.116  0.00  0.00           C  
ATOM   2774  C   ALA X 173     193.205 206.652 297.428  0.00  0.00           C  
ATOM   2775  O   ALA X 173     193.886 206.560 298.454  0.00  0.00           O  
ATOM   2776  CB  ALA X 173     191.104 208.081 297.217  0.00  0.00           C  
ATOM   2777  H   ALA X 173     192.153 208.464 295.083  0.00  0.00           H  
ATOM   2778  HA  ALA X 173     192.949 208.757 297.896  0.00  0.00           H  
ATOM   2779  HB1 ALA X 173     190.775 209.108 297.062  0.00  0.00           H  
ATOM   2780  HB2 ALA X 173     190.818 207.727 298.207  0.00  0.00           H  
ATOM   2781  HB3 ALA X 173     190.507 207.480 296.531  0.00  0.00           H  
ATOM   2782  N   PRO X 174     193.176 205.587 296.591  0.00  0.00           N  
ATOM   2783  CA  PRO X 174     193.887 204.376 297.071  0.00  0.00           C  
ATOM   2784  C   PRO X 174     195.387 204.487 296.948  0.00  0.00           C  
ATOM   2785  O   PRO X 174     196.069 203.889 297.717  0.00  0.00           O  
ATOM   2786  CB  PRO X 174     193.333 203.192 296.234  0.00  0.00           C  
ATOM   2787  CG  PRO X 174     192.041 203.783 295.669  0.00  0.00           C  
ATOM   2788  CD  PRO X 174     192.351 205.283 295.458  0.00  0.00           C  
ATOM   2789  HA  PRO X 174     193.723 204.040 298.095  0.00  0.00           H  
ATOM   2790  HB2 PRO X 174     194.046 202.951 295.445  0.00  0.00           H  
ATOM   2791  HB3 PRO X 174     193.021 202.383 296.894  0.00  0.00           H  
ATOM   2792  HG2 PRO X 174     191.662 203.283 294.778  0.00  0.00           H  
ATOM   2793  HG3 PRO X 174     191.339 203.704 296.498  0.00  0.00           H  
ATOM   2794  HD2 PRO X 174     192.791 205.461 294.477  0.00  0.00           H  
ATOM   2795  HD3 PRO X 174     191.406 205.823 295.515  0.00  0.00           H  
ATOM   2796  N   CYS X 175     195.963 205.234 295.956  0.00  0.00           N  
ATOM   2797  CA  CYS X 175     197.448 205.412 295.862  0.00  0.00           C  
ATOM   2798  C   CYS X 175     198.088 206.064 297.104  0.00  0.00           C  
ATOM   2799  O   CYS X 175     199.105 205.550 297.670  0.00  0.00           O  
ATOM   2800  CB  CYS X 175     197.670 206.301 294.666  0.00  0.00           C  
ATOM   2801  SG  CYS X 175     199.468 206.763 294.527  0.00  0.00           S  
ATOM   2802  H   CYS X 175     195.445 205.686 295.216  0.00  0.00           H  
ATOM   2803  HA  CYS X 175     197.883 204.425 295.707  0.00  0.00           H  
ATOM   2804  HB2 CYS X 175     197.376 205.859 293.714  0.00  0.00           H  
ATOM   2805  HB3 CYS X 175     197.160 207.263 294.731  0.00  0.00           H  
ATOM   2806  HG  CYS X 175     200.195 205.649 294.408  0.00  0.00           H  
ATOM   2807  N   ASN X 176     197.456 207.136 297.594  0.00  0.00           N  
ATOM   2808  CA  ASN X 176     197.823 207.816 298.870  0.00  0.00           C  
ATOM   2809  C   ASN X 176     197.786 206.927 300.162  0.00  0.00           C  
ATOM   2810  O   ASN X 176     198.597 207.160 301.071  0.00  0.00           O  
ATOM   2811  CB  ASN X 176     196.867 209.050 298.874  0.00  0.00           C  
ATOM   2812  CG  ASN X 176     197.423 210.189 299.675  0.00  0.00           C  
ATOM   2813  ND2 ASN X 176     196.714 210.875 300.545  0.00  0.00           N  
ATOM   2814  OD1 ASN X 176     198.627 210.400 299.607  0.00  0.00           O  
ATOM   2815  H   ASN X 176     196.717 207.555 297.047  0.00  0.00           H  
ATOM   2816  HA  ASN X 176     198.841 208.192 298.774  0.00  0.00           H  
ATOM   2817  HB2 ASN X 176     196.760 209.463 297.871  0.00  0.00           H  
ATOM   2818  HB3 ASN X 176     195.922 208.733 299.315  0.00  0.00           H  
ATOM   2819 HD21 ASN X 176     195.714 210.751 300.472  0.00  0.00           H  
ATOM   2820 HD22 ASN X 176     197.170 211.694 300.920  0.00  0.00           H  
ATOM   2821  N   VAL X 177     196.925 205.884 300.289  0.00  0.00           N  
ATOM   2822  CA  VAL X 177     196.959 204.952 301.468  0.00  0.00           C  
ATOM   2823  C   VAL X 177     198.374 204.353 301.516  0.00  0.00           C  
ATOM   2824  O   VAL X 177     199.017 204.409 302.570  0.00  0.00           O  
ATOM   2825  CB  VAL X 177     195.806 203.870 301.220  0.00  0.00           C  
ATOM   2826  CG1 VAL X 177     195.886 202.871 302.363  0.00  0.00           C  
ATOM   2827  CG2 VAL X 177     194.444 204.385 301.140  0.00  0.00           C  
ATOM   2828  H   VAL X 177     196.267 205.705 299.544  0.00  0.00           H  
ATOM   2829  HA  VAL X 177     196.929 205.467 302.429  0.00  0.00           H  
ATOM   2830  HB  VAL X 177     195.999 203.421 300.245  0.00  0.00           H  
ATOM   2831 HG11 VAL X 177     196.836 202.337 302.335  0.00  0.00           H  
ATOM   2832 HG12 VAL X 177     195.756 203.446 303.280  0.00  0.00           H  
ATOM   2833 HG13 VAL X 177     195.159 202.063 302.290  0.00  0.00           H  
ATOM   2834 HG21 VAL X 177     194.151 204.866 302.074  0.00  0.00           H  
ATOM   2835 HG22 VAL X 177     193.816 203.525 300.906  0.00  0.00           H  
ATOM   2836 HG23 VAL X 177     194.408 205.107 300.325  0.00  0.00           H  
ATOM   2837  N   ILE X 178     198.816 203.845 300.321  0.00  0.00           N  
ATOM   2838  CA  ILE X 178     200.149 203.178 300.226  0.00  0.00           C  
ATOM   2839  C   ILE X 178     201.298 204.118 300.557  0.00  0.00           C  
ATOM   2840  O   ILE X 178     202.000 203.859 301.526  0.00  0.00           O  
ATOM   2841  CB  ILE X 178     200.327 202.363 298.935  0.00  0.00           C  
ATOM   2842  CG1 ILE X 178     198.941 201.852 298.360  0.00  0.00           C  
ATOM   2843  CG2 ILE X 178     201.423 201.394 299.323  0.00  0.00           C  
ATOM   2844  CD1 ILE X 178     198.223 200.875 299.300  0.00  0.00           C  
ATOM   2845  H   ILE X 178     198.187 203.715 299.541  0.00  0.00           H  
ATOM   2846  HA  ILE X 178     200.127 202.475 301.058  0.00  0.00           H  
ATOM   2847  HB  ILE X 178     200.742 203.012 298.164  0.00  0.00           H  
ATOM   2848 HG12 ILE X 178     198.297 202.716 298.193  0.00  0.00           H  
ATOM   2849 HG13 ILE X 178     199.137 201.369 297.403  0.00  0.00           H  
ATOM   2850 HG21 ILE X 178     201.045 200.683 300.058  0.00  0.00           H  
ATOM   2851 HG22 ILE X 178     202.331 201.861 299.704  0.00  0.00           H  
ATOM   2852 HG23 ILE X 178     201.685 200.745 298.488  0.00  0.00           H  
ATOM   2853 HD11 ILE X 178     197.214 200.733 298.913  0.00  0.00           H  
ATOM   2854 HD12 ILE X 178     198.143 201.219 300.331  0.00  0.00           H  
ATOM   2855 HD13 ILE X 178     198.682 199.887 299.276  0.00  0.00           H  
ATOM   2856  N   CYS X 179     201.263 205.362 300.042  0.00  0.00           N  
ATOM   2857  CA  CYS X 179     202.153 206.476 300.397  0.00  0.00           C  
ATOM   2858  C   CYS X 179     202.103 206.769 301.910  0.00  0.00           C  
ATOM   2859  O   CYS X 179     203.219 207.000 302.427  0.00  0.00           O  
ATOM   2860  CB  CYS X 179     201.602 207.748 299.592  0.00  0.00           C  
ATOM   2861  SG  CYS X 179     201.661 207.395 297.803  0.00  0.00           S  
ATOM   2862  H   CYS X 179     200.446 205.480 299.461  0.00  0.00           H  
ATOM   2863  HA  CYS X 179     203.213 206.284 300.230  0.00  0.00           H  
ATOM   2864  HB2 CYS X 179     200.623 208.127 299.885  0.00  0.00           H  
ATOM   2865  HB3 CYS X 179     202.307 208.534 299.865  0.00  0.00           H  
ATOM   2866  HG  CYS X 179     200.615 206.600 297.560  0.00  0.00           H  
ATOM   2867  N   SER X 180     200.951 206.776 302.581  0.00  0.00           N  
ATOM   2868  CA  SER X 180     200.771 207.015 303.974  0.00  0.00           C  
ATOM   2869  C   SER X 180     201.327 205.848 304.812  0.00  0.00           C  
ATOM   2870  O   SER X 180     201.662 206.049 305.994  0.00  0.00           O  
ATOM   2871  CB  SER X 180     199.300 207.248 304.302  0.00  0.00           C  
ATOM   2872  OG  SER X 180     198.970 207.479 305.652  0.00  0.00           O  
ATOM   2873  H   SER X 180     200.074 206.664 302.093  0.00  0.00           H  
ATOM   2874  HA  SER X 180     201.346 207.893 304.268  0.00  0.00           H  
ATOM   2875  HB2 SER X 180     198.941 208.077 303.692  0.00  0.00           H  
ATOM   2876  HB3 SER X 180     198.739 206.420 303.868  0.00  0.00           H  
ATOM   2877  HG  SER X 180     199.740 207.964 305.956  0.00  0.00           H  
ATOM   2878  N   ILE X 181     201.312 204.623 304.228  0.00  0.00           N  
ATOM   2879  CA  ILE X 181     202.205 203.580 304.866  0.00  0.00           C  
ATOM   2880  C   ILE X 181     203.755 203.795 304.789  0.00  0.00           C  
ATOM   2881  O   ILE X 181     204.522 203.714 305.786  0.00  0.00           O  
ATOM   2882  CB  ILE X 181     201.711 202.189 304.505  0.00  0.00           C  
ATOM   2883  CG1 ILE X 181     200.266 202.042 305.062  0.00  0.00           C  
ATOM   2884  CG2 ILE X 181     202.608 200.972 304.964  0.00  0.00           C  
ATOM   2885  CD1 ILE X 181     199.723 200.643 304.894  0.00  0.00           C  
ATOM   2886  H   ILE X 181     200.960 204.499 303.290  0.00  0.00           H  
ATOM   2887  HA  ILE X 181     202.001 203.665 305.933  0.00  0.00           H  
ATOM   2888  HB  ILE X 181     201.626 202.168 303.418  0.00  0.00           H  
ATOM   2889 HG12 ILE X 181     200.165 202.367 306.097  0.00  0.00           H  
ATOM   2890 HG13 ILE X 181     199.720 202.819 304.528  0.00  0.00           H  
ATOM   2891 HG21 ILE X 181     202.771 201.059 306.038  0.00  0.00           H  
ATOM   2892 HG22 ILE X 181     203.537 201.074 304.404  0.00  0.00           H  
ATOM   2893 HG23 ILE X 181     202.179 199.975 304.865  0.00  0.00           H  
ATOM   2894 HD11 ILE X 181     200.106 200.228 303.961  0.00  0.00           H  
ATOM   2895 HD12 ILE X 181     198.634 200.639 304.924  0.00  0.00           H  
ATOM   2896 HD13 ILE X 181     200.165 199.961 305.620  0.00  0.00           H  
ATOM   2897  N   ILE X 182     204.219 204.145 303.577  0.00  0.00           N  
ATOM   2898  CA  ILE X 182     205.615 204.404 303.220  0.00  0.00           C  
ATOM   2899  C   ILE X 182     206.279 205.597 303.994  0.00  0.00           C  
ATOM   2900  O   ILE X 182     207.404 205.452 304.544  0.00  0.00           O  
ATOM   2901  CB  ILE X 182     205.690 204.738 301.743  0.00  0.00           C  
ATOM   2902  CG1 ILE X 182     205.202 203.552 300.881  0.00  0.00           C  
ATOM   2903  CG2 ILE X 182     207.050 205.168 301.289  0.00  0.00           C  
ATOM   2904  CD1 ILE X 182     206.007 202.192 300.875  0.00  0.00           C  
ATOM   2905  H   ILE X 182     203.480 204.112 302.890  0.00  0.00           H  
ATOM   2906  HA  ILE X 182     206.295 203.578 303.428  0.00  0.00           H  
ATOM   2907  HB  ILE X 182     205.060 205.608 301.557  0.00  0.00           H  
ATOM   2908 HG12 ILE X 182     204.281 203.152 301.307  0.00  0.00           H  
ATOM   2909 HG13 ILE X 182     204.845 203.919 299.918  0.00  0.00           H  
ATOM   2910 HG21 ILE X 182     207.392 206.091 301.758  0.00  0.00           H  
ATOM   2911 HG22 ILE X 182     207.064 205.411 300.227  0.00  0.00           H  
ATOM   2912 HG23 ILE X 182     207.816 204.394 301.347  0.00  0.00           H  
ATOM   2913 HD11 ILE X 182     205.523 201.476 300.211  0.00  0.00           H  
ATOM   2914 HD12 ILE X 182     206.075 201.832 301.901  0.00  0.00           H  
ATOM   2915 HD13 ILE X 182     207.018 202.313 300.487  0.00  0.00           H  
ATOM   2916  N   PHE X 183     205.540 206.678 304.202  0.00  0.00           N  
ATOM   2917  CA  PHE X 183     205.906 207.888 304.880  0.00  0.00           C  
ATOM   2918  C   PHE X 183     204.998 208.182 306.101  0.00  0.00           C  
ATOM   2919  O   PHE X 183     203.963 207.590 306.309  0.00  0.00           O  
ATOM   2920  CB  PHE X 183     205.963 209.081 303.882  0.00  0.00           C  
ATOM   2921  CG  PHE X 183     206.646 209.016 302.577  0.00  0.00           C  
ATOM   2922  CD1 PHE X 183     208.030 208.888 302.516  0.00  0.00           C  
ATOM   2923  CD2 PHE X 183     205.888 209.072 301.404  0.00  0.00           C  
ATOM   2924  CE1 PHE X 183     208.645 208.898 301.273  0.00  0.00           C  
ATOM   2925  CE2 PHE X 183     206.486 209.010 300.155  0.00  0.00           C  
ATOM   2926  CZ  PHE X 183     207.916 208.933 300.070  0.00  0.00           C  
ATOM   2927  H   PHE X 183     204.750 206.750 303.577  0.00  0.00           H  
ATOM   2928  HA  PHE X 183     206.838 207.707 305.416  0.00  0.00           H  
ATOM   2929  HB2 PHE X 183     204.914 209.325 303.715  0.00  0.00           H  
ATOM   2930  HB3 PHE X 183     206.478 209.838 304.474  0.00  0.00           H  
ATOM   2931  HD1 PHE X 183     208.607 208.860 303.428  0.00  0.00           H  
ATOM   2932  HD2 PHE X 183     204.817 209.191 301.470  0.00  0.00           H  
ATOM   2933  HE1 PHE X 183     209.718 208.994 301.196  0.00  0.00           H  
ATOM   2934  HE2 PHE X 183     205.816 209.087 299.312  0.00  0.00           H  
ATOM   2935  HZ  PHE X 183     208.410 209.062 299.118  0.00  0.00           H  
ATOM   2936  N   GLN X 184     205.365 209.095 307.012  0.00  0.00           N  
ATOM   2937  CA  GLN X 184     204.694 209.403 308.271  0.00  0.00           C  
ATOM   2938  C   GLN X 184     203.373 210.172 308.164  0.00  0.00           C  
ATOM   2939  O   GLN X 184     202.417 209.896 308.913  0.00  0.00           O  
ATOM   2940  CB  GLN X 184     205.770 210.105 309.136  0.00  0.00           C  
ATOM   2941  CG  GLN X 184     205.277 210.368 310.607  0.00  0.00           C  
ATOM   2942  CD  GLN X 184     204.397 211.649 310.799  0.00  0.00           C  
ATOM   2943  NE2 GLN X 184     203.551 211.676 311.819  0.00  0.00           N  
ATOM   2944  OE1 GLN X 184     204.449 212.652 310.072  0.00  0.00           O  
ATOM   2945  H   GLN X 184     206.187 209.663 306.866  0.00  0.00           H  
ATOM   2946  HA  GLN X 184     204.439 208.519 308.855  0.00  0.00           H  
ATOM   2947  HB2 GLN X 184     206.657 209.472 309.181  0.00  0.00           H  
ATOM   2948  HB3 GLN X 184     206.121 211.059 308.744  0.00  0.00           H  
ATOM   2949  HG2 GLN X 184     204.935 209.472 311.125  0.00  0.00           H  
ATOM   2950  HG3 GLN X 184     206.139 210.589 311.237  0.00  0.00           H  
ATOM   2951 HE21 GLN X 184     203.178 212.580 312.071  0.00  0.00           H  
ATOM   2952 HE22 GLN X 184     203.595 210.865 312.419  0.00  0.00           H  
ATOM   2953  N   LYS X 185     203.337 211.038 307.154  0.00  0.00           N  
ATOM   2954  CA  LYS X 185     202.136 211.726 306.742  0.00  0.00           C  
ATOM   2955  C   LYS X 185     201.770 211.571 305.265  0.00  0.00           C  
ATOM   2956  O   LYS X 185     202.607 211.657 304.317  0.00  0.00           O  
ATOM   2957  CB  LYS X 185     202.130 213.188 307.230  0.00  0.00           C  
ATOM   2958  CG  LYS X 185     203.391 213.879 306.819  0.00  0.00           C  
ATOM   2959  CD  LYS X 185     203.440 215.345 307.132  0.00  0.00           C  
ATOM   2960  CE  LYS X 185     203.107 215.712 308.606  0.00  0.00           C  
ATOM   2961  NZ  LYS X 185     204.223 215.517 309.538  0.00  0.00           N1+
ATOM   2962  H   LYS X 185     204.201 211.234 306.668  0.00  0.00           H  
ATOM   2963  HA  LYS X 185     201.215 211.372 307.205  0.00  0.00           H  
ATOM   2964  HB2 LYS X 185     201.237 213.665 306.826  0.00  0.00           H  
ATOM   2965  HB3 LYS X 185     202.099 213.166 308.319  0.00  0.00           H  
ATOM   2966  HG2 LYS X 185     204.161 213.370 307.399  0.00  0.00           H  
ATOM   2967  HG3 LYS X 185     203.450 213.777 305.735  0.00  0.00           H  
ATOM   2968  HD2 LYS X 185     204.464 215.625 306.882  0.00  0.00           H  
ATOM   2969  HD3 LYS X 185     202.690 215.874 306.544  0.00  0.00           H  
ATOM   2970  HE2 LYS X 185     202.930 216.785 308.679  0.00  0.00           H  
ATOM   2971  HE3 LYS X 185     202.228 215.112 308.842  0.00  0.00           H  
ATOM   2972  HZ1 LYS X 185     204.143 216.099 310.360  0.00  0.00           H  
ATOM   2973  HZ2 LYS X 185     205.088 215.778 309.087  0.00  0.00           H  
ATOM   2974  HZ3 LYS X 185     204.252 214.525 309.723  0.00  0.00           H  
ATOM   2975  N   ARG X 186     200.440 211.478 304.972  0.00  0.00           N  
ATOM   2976  CA  ARG X 186     199.841 211.679 303.652  0.00  0.00           C  
ATOM   2977  C   ARG X 186     200.221 212.936 302.898  0.00  0.00           C  
ATOM   2978  O   ARG X 186     200.685 213.902 303.485  0.00  0.00           O  
ATOM   2979  CB  ARG X 186     198.299 211.543 303.849  0.00  0.00           C  
ATOM   2980  CG  ARG X 186     197.698 212.715 304.616  0.00  0.00           C  
ATOM   2981  CD  ARG X 186     196.171 212.544 304.962  0.00  0.00           C  
ATOM   2982  NE  ARG X 186     195.398 212.367 303.718  0.00  0.00           N  
ATOM   2983  CZ  ARG X 186     194.983 213.315 302.882  0.00  0.00           C  
ATOM   2984  NH1 ARG X 186     195.251 214.569 303.056  0.00  0.00           N1+
ATOM   2985  NH2 ARG X 186     194.421 212.957 301.784  0.00  0.00           N  
ATOM   2986  H   ARG X 186     199.793 211.422 305.745  0.00  0.00           H  
ATOM   2987  HA  ARG X 186     200.268 210.878 303.049  0.00  0.00           H  
ATOM   2988  HB2 ARG X 186     197.763 211.550 302.900  0.00  0.00           H  
ATOM   2989  HB3 ARG X 186     198.184 210.607 304.396  0.00  0.00           H  
ATOM   2990  HG2 ARG X 186     198.222 212.914 305.551  0.00  0.00           H  
ATOM   2991  HG3 ARG X 186     197.842 213.670 304.110  0.00  0.00           H  
ATOM   2992  HD2 ARG X 186     196.091 211.649 305.579  0.00  0.00           H  
ATOM   2993  HD3 ARG X 186     195.710 213.382 305.486  0.00  0.00           H  
ATOM   2994  HE  ARG X 186     195.206 211.410 303.458  0.00  0.00           H  
ATOM   2995 HH11 ARG X 186     195.835 214.792 303.850  0.00  0.00           H  
ATOM   2996 HH12 ARG X 186     195.056 215.263 302.348  0.00  0.00           H  
ATOM   2997 HH21 ARG X 186     194.152 212.004 301.583  0.00  0.00           H  
ATOM   2998 HH22 ARG X 186     194.146 213.690 301.146  0.00  0.00           H  
ATOM   2999  N   PHE X 187     199.958 212.897 301.604  0.00  0.00           N  
ATOM   3000  CA  PHE X 187     199.837 214.041 300.718  0.00  0.00           C  
ATOM   3001  C   PHE X 187     198.298 214.446 300.632  0.00  0.00           C  
ATOM   3002  O   PHE X 187     197.482 213.549 300.808  0.00  0.00           O  
ATOM   3003  CB  PHE X 187     200.323 213.706 299.308  0.00  0.00           C  
ATOM   3004  CG  PHE X 187     201.717 213.208 299.247  0.00  0.00           C  
ATOM   3005  CD1 PHE X 187     201.904 211.836 299.226  0.00  0.00           C  
ATOM   3006  CD2 PHE X 187     202.738 214.176 299.337  0.00  0.00           C  
ATOM   3007  CE1 PHE X 187     203.274 211.410 299.183  0.00  0.00           C  
ATOM   3008  CE2 PHE X 187     204.063 213.693 299.294  0.00  0.00           C  
ATOM   3009  CZ  PHE X 187     204.291 212.317 299.140  0.00  0.00           C  
ATOM   3010  H   PHE X 187     199.867 212.057 301.052  0.00  0.00           H  
ATOM   3011  HA  PHE X 187     200.427 214.904 301.027  0.00  0.00           H  
ATOM   3012  HB2 PHE X 187     199.646 212.979 298.859  0.00  0.00           H  
ATOM   3013  HB3 PHE X 187     200.334 214.531 298.596  0.00  0.00           H  
ATOM   3014  HD1 PHE X 187     201.049 211.176 299.212  0.00  0.00           H  
ATOM   3015  HD2 PHE X 187     202.437 215.211 299.399  0.00  0.00           H  
ATOM   3016  HE1 PHE X 187     203.533 210.363 299.128  0.00  0.00           H  
ATOM   3017  HE2 PHE X 187     204.917 214.338 299.444  0.00  0.00           H  
ATOM   3018  HZ  PHE X 187     205.349 212.103 299.100  0.00  0.00           H  
ATOM   3019  N   ASP X 188     197.982 215.650 300.034  0.00  0.00           N  
ATOM   3020  CA  ASP X 188     196.708 215.832 299.282  0.00  0.00           C  
ATOM   3021  C   ASP X 188     196.796 215.408 297.771  0.00  0.00           C  
ATOM   3022  O   ASP X 188     197.919 215.511 297.302  0.00  0.00           O  
ATOM   3023  CB  ASP X 188     196.183 217.333 299.398  0.00  0.00           C  
ATOM   3024  CG  ASP X 188     195.768 217.673 300.808  0.00  0.00           C  
ATOM   3025  OD1 ASP X 188     196.185 218.827 301.220  0.00  0.00           O  
ATOM   3026  OD2 ASP X 188     195.014 216.921 301.517  0.00  0.00           O1-
ATOM   3027  H   ASP X 188     198.681 216.363 299.885  0.00  0.00           H  
ATOM   3028  HA  ASP X 188     195.970 215.175 299.742  0.00  0.00           H  
ATOM   3029  HB2 ASP X 188     197.012 217.981 299.113  0.00  0.00           H  
ATOM   3030  HB3 ASP X 188     195.352 217.455 298.703  0.00  0.00           H  
ATOM   3031  N   TYR X 189     195.704 215.152 297.087  0.00  0.00           N  
ATOM   3032  CA  TYR X 189     195.808 214.697 295.724  0.00  0.00           C  
ATOM   3033  C   TYR X 189     196.316 215.728 294.686  0.00  0.00           C  
ATOM   3034  O   TYR X 189     196.793 215.386 293.604  0.00  0.00           O  
ATOM   3035  CB  TYR X 189     194.417 214.101 295.356  0.00  0.00           C  
ATOM   3036  CG  TYR X 189     193.649 213.089 296.208  0.00  0.00           C  
ATOM   3037  CD1 TYR X 189     192.201 213.007 296.271  0.00  0.00           C  
ATOM   3038  CD2 TYR X 189     194.385 212.240 297.090  0.00  0.00           C  
ATOM   3039  CE1 TYR X 189     191.559 212.098 297.159  0.00  0.00           C  
ATOM   3040  CE2 TYR X 189     193.736 211.506 298.033  0.00  0.00           C  
ATOM   3041  CZ  TYR X 189     192.341 211.354 298.056  0.00  0.00           C  
ATOM   3042  OH  TYR X 189     191.775 210.583 299.051  0.00  0.00           O  
ATOM   3043  H   TYR X 189     194.839 215.152 297.608  0.00  0.00           H  
ATOM   3044  HA  TYR X 189     196.522 213.873 295.713  0.00  0.00           H  
ATOM   3045  HB2 TYR X 189     193.846 214.992 295.094  0.00  0.00           H  
ATOM   3046  HB3 TYR X 189     194.504 213.737 294.332  0.00  0.00           H  
ATOM   3047  HD1 TYR X 189     191.671 213.680 295.613  0.00  0.00           H  
ATOM   3048  HD2 TYR X 189     195.462 212.187 297.018  0.00  0.00           H  
ATOM   3049  HE1 TYR X 189     190.504 212.180 297.376  0.00  0.00           H  
ATOM   3050  HE2 TYR X 189     194.324 210.947 298.745  0.00  0.00           H  
ATOM   3051  HH  TYR X 189     192.491 210.319 299.634  0.00  0.00           H  
ATOM   3052  N   LYS X 190     196.239 217.013 294.998  0.00  0.00           N  
ATOM   3053  CA  LYS X 190     196.644 218.172 294.175  0.00  0.00           C  
ATOM   3054  C   LYS X 190     198.018 218.745 294.457  0.00  0.00           C  
ATOM   3055  O   LYS X 190     198.476 219.645 293.719  0.00  0.00           O  
ATOM   3056  CB  LYS X 190     195.406 219.174 294.158  0.00  0.00           C  
ATOM   3057  CG  LYS X 190     195.204 220.170 292.929  0.00  0.00           C  
ATOM   3058  CD  LYS X 190     195.327 219.610 291.518  0.00  0.00           C  
ATOM   3059  CE  LYS X 190     194.799 220.630 290.471  0.00  0.00           C  
ATOM   3060  NZ  LYS X 190     194.073 220.055 289.296  0.00  0.00           N1+
ATOM   3061  H   LYS X 190     195.833 217.247 295.892  0.00  0.00           H  
ATOM   3062  HA  LYS X 190     196.798 217.823 293.154  0.00  0.00           H  
ATOM   3063  HB2 LYS X 190     194.525 218.614 294.472  0.00  0.00           H  
ATOM   3064  HB3 LYS X 190     195.590 219.758 295.060  0.00  0.00           H  
ATOM   3065  HG2 LYS X 190     194.175 220.525 292.881  0.00  0.00           H  
ATOM   3066  HG3 LYS X 190     195.866 221.022 293.088  0.00  0.00           H  
ATOM   3067  HD2 LYS X 190     196.315 219.236 291.251  0.00  0.00           H  
ATOM   3068  HD3 LYS X 190     194.642 218.770 291.406  0.00  0.00           H  
ATOM   3069  HE2 LYS X 190     194.220 221.430 290.933  0.00  0.00           H  
ATOM   3070  HE3 LYS X 190     195.596 221.245 290.053  0.00  0.00           H  
ATOM   3071  HZ1 LYS X 190     194.554 219.363 288.739  0.00  0.00           H  
ATOM   3072  HZ2 LYS X 190     193.907 220.769 288.601  0.00  0.00           H  
ATOM   3073  HZ3 LYS X 190     193.159 219.756 289.605  0.00  0.00           H  
ATOM   3074  N   ASP X 191     198.732 218.232 295.422  0.00  0.00           N  
ATOM   3075  CA  ASP X 191     200.114 218.623 295.715  0.00  0.00           C  
ATOM   3076  C   ASP X 191     201.170 218.173 294.706  0.00  0.00           C  
ATOM   3077  O   ASP X 191     201.120 217.045 294.238  0.00  0.00           O  
ATOM   3078  CB  ASP X 191     200.508 218.139 297.133  0.00  0.00           C  
ATOM   3079  CG  ASP X 191     199.658 218.632 298.301  0.00  0.00           C  
ATOM   3080  OD1 ASP X 191     199.801 218.034 299.402  0.00  0.00           O  
ATOM   3081  OD2 ASP X 191     198.932 219.655 298.173  0.00  0.00           O1-
ATOM   3082  H   ASP X 191     198.327 217.559 296.057  0.00  0.00           H  
ATOM   3083  HA  ASP X 191     200.207 219.706 295.791  0.00  0.00           H  
ATOM   3084  HB2 ASP X 191     200.432 217.052 297.142  0.00  0.00           H  
ATOM   3085  HB3 ASP X 191     201.574 218.246 297.335  0.00  0.00           H  
ATOM   3086  N   GLN X 192     202.065 219.065 294.322  0.00  0.00           N  
ATOM   3087  CA  GLN X 192     202.881 218.777 293.115  0.00  0.00           C  
ATOM   3088  C   GLN X 192     203.835 217.625 293.236  0.00  0.00           C  
ATOM   3089  O   GLN X 192     204.208 216.967 292.287  0.00  0.00           O  
ATOM   3090  CB  GLN X 192     203.586 219.995 292.592  0.00  0.00           C  
ATOM   3091  CG  GLN X 192     204.618 220.782 293.455  0.00  0.00           C  
ATOM   3092  CD  GLN X 192     205.876 219.995 293.768  0.00  0.00           C  
ATOM   3093  NE2 GLN X 192     206.391 220.138 294.965  0.00  0.00           N  
ATOM   3094  OE1 GLN X 192     206.445 219.389 292.934  0.00  0.00           O  
ATOM   3095  H   GLN X 192     202.014 220.020 294.648  0.00  0.00           H  
ATOM   3096  HA  GLN X 192     202.130 218.542 292.361  0.00  0.00           H  
ATOM   3097  HB2 GLN X 192     204.227 219.746 291.746  0.00  0.00           H  
ATOM   3098  HB3 GLN X 192     202.885 220.704 292.150  0.00  0.00           H  
ATOM   3099  HG2 GLN X 192     204.933 221.753 293.073  0.00  0.00           H  
ATOM   3100  HG3 GLN X 192     204.128 220.903 294.421  0.00  0.00           H  
ATOM   3101 HE21 GLN X 192     207.264 219.655 295.121  0.00  0.00           H  
ATOM   3102 HE22 GLN X 192     206.213 220.912 295.590  0.00  0.00           H  
ATOM   3103  N   GLN X 193     204.263 217.231 294.400  0.00  0.00           N  
ATOM   3104  CA  GLN X 193     204.971 216.009 294.683  0.00  0.00           C  
ATOM   3105  C   GLN X 193     204.138 214.759 294.486  0.00  0.00           C  
ATOM   3106  O   GLN X 193     204.718 213.757 294.204  0.00  0.00           O  
ATOM   3107  CB  GLN X 193     205.390 216.084 296.156  0.00  0.00           C  
ATOM   3108  CG  GLN X 193     206.457 215.019 296.654  0.00  0.00           C  
ATOM   3109  CD  GLN X 193     207.679 214.930 295.800  0.00  0.00           C  
ATOM   3110  NE2 GLN X 193     208.547 213.933 296.004  0.00  0.00           N  
ATOM   3111  OE1 GLN X 193     207.916 215.755 294.957  0.00  0.00           O  
ATOM   3112  H   GLN X 193     204.255 217.960 295.098  0.00  0.00           H  
ATOM   3113  HA  GLN X 193     205.805 215.846 294.000  0.00  0.00           H  
ATOM   3114  HB2 GLN X 193     205.930 216.997 296.407  0.00  0.00           H  
ATOM   3115  HB3 GLN X 193     204.517 216.154 296.806  0.00  0.00           H  
ATOM   3116  HG2 GLN X 193     206.723 215.308 297.671  0.00  0.00           H  
ATOM   3117  HG3 GLN X 193     205.922 214.071 296.698  0.00  0.00           H  
ATOM   3118 HE21 GLN X 193     209.310 214.051 295.353  0.00  0.00           H  
ATOM   3119 HE22 GLN X 193     208.580 213.262 296.758  0.00  0.00           H  
ATOM   3120  N   PHE X 194     202.832 214.755 294.775  0.00  0.00           N  
ATOM   3121  CA  PHE X 194     201.897 213.552 294.716  0.00  0.00           C  
ATOM   3122  C   PHE X 194     201.303 213.504 293.323  0.00  0.00           C  
ATOM   3123  O   PHE X 194     201.440 212.393 292.778  0.00  0.00           O  
ATOM   3124  CB  PHE X 194     200.872 213.576 295.850  0.00  0.00           C  
ATOM   3125  CG  PHE X 194     199.922 212.417 295.759  0.00  0.00           C  
ATOM   3126  CD1 PHE X 194     200.169 211.118 296.286  0.00  0.00           C  
ATOM   3127  CD2 PHE X 194     198.724 212.526 295.023  0.00  0.00           C  
ATOM   3128  CE1 PHE X 194     199.343 210.005 296.051  0.00  0.00           C  
ATOM   3129  CE2 PHE X 194     197.842 211.405 294.819  0.00  0.00           C  
ATOM   3130  CZ  PHE X 194     198.250 210.145 295.213  0.00  0.00           C  
ATOM   3131  H   PHE X 194     202.387 215.640 294.970  0.00  0.00           H  
ATOM   3132  HA  PHE X 194     202.465 212.633 294.860  0.00  0.00           H  
ATOM   3133  HB2 PHE X 194     201.365 213.567 296.822  0.00  0.00           H  
ATOM   3134  HB3 PHE X 194     200.347 214.530 295.793  0.00  0.00           H  
ATOM   3135  HD1 PHE X 194     201.113 210.997 296.796  0.00  0.00           H  
ATOM   3136  HD2 PHE X 194     198.439 213.442 294.526  0.00  0.00           H  
ATOM   3137  HE1 PHE X 194     199.598 209.068 296.523  0.00  0.00           H  
ATOM   3138  HE2 PHE X 194     196.975 211.572 294.197  0.00  0.00           H  
ATOM   3139  HZ  PHE X 194     197.635 209.282 295.005  0.00  0.00           H  
ATOM   3140  N   LEU X 195     200.996 214.578 292.594  0.00  0.00           N  
ATOM   3141  CA  LEU X 195     200.857 214.569 291.182  0.00  0.00           C  
ATOM   3142  C   LEU X 195     202.024 213.898 290.426  0.00  0.00           C  
ATOM   3143  O   LEU X 195     201.817 213.098 289.516  0.00  0.00           O  
ATOM   3144  CB  LEU X 195     200.737 215.980 290.700  0.00  0.00           C  
ATOM   3145  CG  LEU X 195     199.256 216.459 290.868  0.00  0.00           C  
ATOM   3146  CD1 LEU X 195     199.257 217.991 290.818  0.00  0.00           C  
ATOM   3147  CD2 LEU X 195     198.445 215.971 289.669  0.00  0.00           C  
ATOM   3148  H   LEU X 195     200.945 215.401 293.178  0.00  0.00           H  
ATOM   3149  HA  LEU X 195     200.056 213.928 290.815  0.00  0.00           H  
ATOM   3150  HB2 LEU X 195     201.429 216.656 291.200  0.00  0.00           H  
ATOM   3151  HB3 LEU X 195     200.929 215.985 289.627  0.00  0.00           H  
ATOM   3152  HG  LEU X 195     198.775 216.114 291.783  0.00  0.00           H  
ATOM   3153 HD11 LEU X 195     199.700 218.427 291.714  0.00  0.00           H  
ATOM   3154 HD12 LEU X 195     198.220 218.320 290.754  0.00  0.00           H  
ATOM   3155 HD13 LEU X 195     199.791 218.382 289.952  0.00  0.00           H  
ATOM   3156 HD21 LEU X 195     197.424 216.327 289.803  0.00  0.00           H  
ATOM   3157 HD22 LEU X 195     198.874 216.413 288.769  0.00  0.00           H  
ATOM   3158 HD23 LEU X 195     198.383 214.905 289.447  0.00  0.00           H  
ATOM   3159  N   ASN X 196     203.246 214.273 290.788  0.00  0.00           N  
ATOM   3160  CA  ASN X 196     204.444 213.656 290.263  0.00  0.00           C  
ATOM   3161  C   ASN X 196     204.744 212.202 290.643  0.00  0.00           C  
ATOM   3162  O   ASN X 196     204.993 211.383 289.766  0.00  0.00           O  
ATOM   3163  CB  ASN X 196     205.729 214.442 290.511  0.00  0.00           C  
ATOM   3164  CG  ASN X 196     205.810 215.503 289.442  0.00  0.00           C  
ATOM   3165  ND2 ASN X 196     204.957 216.463 289.520  0.00  0.00           N  
ATOM   3166  OD1 ASN X 196     206.545 215.404 288.448  0.00  0.00           O  
ATOM   3167  H   ASN X 196     203.360 215.054 291.419  0.00  0.00           H  
ATOM   3168  HA  ASN X 196     204.160 213.635 289.211  0.00  0.00           H  
ATOM   3169  HB2 ASN X 196     205.755 214.880 291.509  0.00  0.00           H  
ATOM   3170  HB3 ASN X 196     206.633 213.852 290.357  0.00  0.00           H  
ATOM   3171 HD21 ASN X 196     204.568 216.613 290.440  0.00  0.00           H  
ATOM   3172 HD22 ASN X 196     205.213 217.274 288.974  0.00  0.00           H  
ATOM   3173  N   LEU X 197     204.618 211.879 291.957  0.00  0.00           N  
ATOM   3174  CA  LEU X 197     204.758 210.526 292.464  0.00  0.00           C  
ATOM   3175  C   LEU X 197     203.869 209.451 291.753  0.00  0.00           C  
ATOM   3176  O   LEU X 197     204.378 208.534 291.102  0.00  0.00           O  
ATOM   3177  CB  LEU X 197     204.687 210.506 293.985  0.00  0.00           C  
ATOM   3178  CG  LEU X 197     204.796 209.135 294.718  0.00  0.00           C  
ATOM   3179  CD1 LEU X 197     205.966 208.326 294.122  0.00  0.00           C  
ATOM   3180  CD2 LEU X 197     204.974 209.463 296.121  0.00  0.00           C  
ATOM   3181  H   LEU X 197     204.695 212.606 292.654  0.00  0.00           H  
ATOM   3182  HA  LEU X 197     205.775 210.193 292.258  0.00  0.00           H  
ATOM   3183  HB2 LEU X 197     205.500 211.155 294.311  0.00  0.00           H  
ATOM   3184  HB3 LEU X 197     203.724 210.924 294.275  0.00  0.00           H  
ATOM   3185  HG  LEU X 197     203.839 208.619 294.791  0.00  0.00           H  
ATOM   3186 HD11 LEU X 197     206.938 208.817 294.078  0.00  0.00           H  
ATOM   3187 HD12 LEU X 197     205.801 207.895 293.135  0.00  0.00           H  
ATOM   3188 HD13 LEU X 197     206.164 207.498 294.802  0.00  0.00           H  
ATOM   3189 HD21 LEU X 197     204.413 208.794 296.774  0.00  0.00           H  
ATOM   3190 HD22 LEU X 197     206.046 209.492 296.319  0.00  0.00           H  
ATOM   3191 HD23 LEU X 197     204.699 210.495 296.343  0.00  0.00           H  
ATOM   3192  N   MET X 198     202.550 209.706 291.642  0.00  0.00           N  
ATOM   3193  CA  MET X 198     201.487 208.859 290.984  0.00  0.00           C  
ATOM   3194  C   MET X 198     201.673 208.797 289.478  0.00  0.00           C  
ATOM   3195  O   MET X 198     201.385 207.705 288.926  0.00  0.00           O  
ATOM   3196  CB  MET X 198     200.138 209.519 291.371  0.00  0.00           C  
ATOM   3197  CG  MET X 198     198.975 208.611 291.008  0.00  0.00           C  
ATOM   3198  SD  MET X 198     197.290 209.118 291.353  0.00  0.00           S  
ATOM   3199  CE  MET X 198     196.916 210.190 289.966  0.00  0.00           C  
ATOM   3200  H   MET X 198     202.220 210.489 292.189  0.00  0.00           H  
ATOM   3201  HA  MET X 198     201.509 207.923 291.541  0.00  0.00           H  
ATOM   3202  HB2 MET X 198     200.048 209.795 292.421  0.00  0.00           H  
ATOM   3203  HB3 MET X 198     199.970 210.437 290.807  0.00  0.00           H  
ATOM   3204  HG2 MET X 198     198.995 208.365 289.946  0.00  0.00           H  
ATOM   3205  HG3 MET X 198     199.036 207.665 291.545  0.00  0.00           H  
ATOM   3206  HE1 MET X 198     197.458 209.883 289.071  0.00  0.00           H  
ATOM   3207  HE2 MET X 198     195.848 210.144 289.753  0.00  0.00           H  
ATOM   3208  HE3 MET X 198     197.221 211.156 290.369  0.00  0.00           H  
ATOM   3209  N   GLU X 199     202.111 209.866 288.823  0.00  0.00           N  
ATOM   3210  CA  GLU X 199     202.321 209.875 287.434  0.00  0.00           C  
ATOM   3211  C   GLU X 199     203.554 209.078 287.040  0.00  0.00           C  
ATOM   3212  O   GLU X 199     203.458 208.401 286.025  0.00  0.00           O  
ATOM   3213  CB  GLU X 199     202.218 211.317 286.973  0.00  0.00           C  
ATOM   3214  CG  GLU X 199     202.767 211.550 285.560  0.00  0.00           C  
ATOM   3215  CD  GLU X 199     201.981 210.742 284.559  0.00  0.00           C  
ATOM   3216  OE1 GLU X 199     202.518 210.633 283.411  0.00  0.00           O  
ATOM   3217  OE2 GLU X 199     200.826 210.245 284.820  0.00  0.00           O1-
ATOM   3218  H   GLU X 199     202.267 210.737 289.309  0.00  0.00           H  
ATOM   3219  HA  GLU X 199     201.503 209.383 286.908  0.00  0.00           H  
ATOM   3220  HB2 GLU X 199     201.173 211.621 287.039  0.00  0.00           H  
ATOM   3221  HB3 GLU X 199     202.811 211.952 287.631  0.00  0.00           H  
ATOM   3222  HG2 GLU X 199     202.496 212.572 285.296  0.00  0.00           H  
ATOM   3223  HG3 GLU X 199     203.838 211.347 285.592  0.00  0.00           H  
ATOM   3224  N   LYS X 200     204.624 209.125 287.728  0.00  0.00           N  
ATOM   3225  CA  LYS X 200     205.921 208.395 287.480  0.00  0.00           C  
ATOM   3226  C   LYS X 200     205.884 206.920 287.865  0.00  0.00           C  
ATOM   3227  O   LYS X 200     206.530 206.107 287.198  0.00  0.00           O  
ATOM   3228  CB  LYS X 200     207.001 209.113 288.302  0.00  0.00           C  
ATOM   3229  CG  LYS X 200     207.234 210.537 287.800  0.00  0.00           C  
ATOM   3230  CD  LYS X 200     208.571 211.272 288.204  0.00  0.00           C  
ATOM   3231  CE  LYS X 200     208.456 212.740 287.874  0.00  0.00           C  
ATOM   3232  NZ  LYS X 200     209.190 213.162 286.664  0.00  0.00           N1+
ATOM   3233  H   LYS X 200     204.697 209.792 288.482  0.00  0.00           H  
ATOM   3234  HA  LYS X 200     206.046 208.584 286.414  0.00  0.00           H  
ATOM   3235  HB2 LYS X 200     206.585 209.236 289.302  0.00  0.00           H  
ATOM   3236  HB3 LYS X 200     207.955 208.593 288.207  0.00  0.00           H  
ATOM   3237  HG2 LYS X 200     207.295 210.431 286.717  0.00  0.00           H  
ATOM   3238  HG3 LYS X 200     206.353 211.164 287.935  0.00  0.00           H  
ATOM   3239  HD2 LYS X 200     208.765 211.121 289.266  0.00  0.00           H  
ATOM   3240  HD3 LYS X 200     209.467 210.925 287.688  0.00  0.00           H  
ATOM   3241  HE2 LYS X 200     207.383 212.926 287.822  0.00  0.00           H  
ATOM   3242  HE3 LYS X 200     208.853 213.299 288.722  0.00  0.00           H  
ATOM   3243  HZ1 LYS X 200     208.954 214.132 286.511  0.00  0.00           H  
ATOM   3244  HZ2 LYS X 200     208.794 212.689 285.864  0.00  0.00           H  
ATOM   3245  HZ3 LYS X 200     210.182 213.008 286.773  0.00  0.00           H  
ATOM   3246  N   LEU X 201     205.089 206.572 288.895  0.00  0.00           N  
ATOM   3247  CA  LEU X 201     204.578 205.217 289.154  0.00  0.00           C  
ATOM   3248  C   LEU X 201     203.781 204.778 287.941  0.00  0.00           C  
ATOM   3249  O   LEU X 201     203.998 203.702 287.313  0.00  0.00           O  
ATOM   3250  CB  LEU X 201     203.732 205.136 290.464  0.00  0.00           C  
ATOM   3251  CG  LEU X 201     204.623 205.421 291.711  0.00  0.00           C  
ATOM   3252  CD1 LEU X 201     203.565 205.648 292.863  0.00  0.00           C  
ATOM   3253  CD2 LEU X 201     205.606 204.306 292.150  0.00  0.00           C  
ATOM   3254  H   LEU X 201     204.791 207.363 289.448  0.00  0.00           H  
ATOM   3255  HA  LEU X 201     205.297 204.398 289.127  0.00  0.00           H  
ATOM   3256  HB2 LEU X 201     203.163 206.064 290.409  0.00  0.00           H  
ATOM   3257  HB3 LEU X 201     203.089 204.263 290.581  0.00  0.00           H  
ATOM   3258  HG  LEU X 201     205.200 206.342 291.627  0.00  0.00           H  
ATOM   3259 HD11 LEU X 201     203.080 204.722 293.171  0.00  0.00           H  
ATOM   3260 HD12 LEU X 201     202.825 206.376 292.530  0.00  0.00           H  
ATOM   3261 HD13 LEU X 201     204.115 205.984 293.743  0.00  0.00           H  
ATOM   3262 HD21 LEU X 201     205.012 203.547 292.659  0.00  0.00           H  
ATOM   3263 HD22 LEU X 201     206.132 203.894 291.288  0.00  0.00           H  
ATOM   3264 HD23 LEU X 201     206.181 204.739 292.968  0.00  0.00           H  
ATOM   3265  N   ASN X 202     202.738 205.528 287.581  0.00  0.00           N  
ATOM   3266  CA  ASN X 202     201.950 205.026 286.418  0.00  0.00           C  
ATOM   3267  C   ASN X 202     202.801 204.861 285.166  0.00  0.00           C  
ATOM   3268  O   ASN X 202     202.482 203.979 284.380  0.00  0.00           O  
ATOM   3269  CB  ASN X 202     200.751 205.972 286.199  0.00  0.00           C  
ATOM   3270  CG  ASN X 202     199.525 205.604 286.995  0.00  0.00           C  
ATOM   3271  ND2 ASN X 202     198.738 206.535 287.406  0.00  0.00           N  
ATOM   3272  OD1 ASN X 202     199.276 204.456 287.195  0.00  0.00           O  
ATOM   3273  H   ASN X 202     202.450 206.322 288.134  0.00  0.00           H  
ATOM   3274  HA  ASN X 202     201.488 204.087 286.722  0.00  0.00           H  
ATOM   3275  HB2 ASN X 202     201.049 207.016 286.290  0.00  0.00           H  
ATOM   3276  HB3 ASN X 202     200.382 205.893 285.177  0.00  0.00           H  
ATOM   3277 HD21 ASN X 202     198.862 207.520 287.220  0.00  0.00           H  
ATOM   3278 HD22 ASN X 202     197.952 206.292 287.993  0.00  0.00           H  
ATOM   3279  N   GLU X 203     203.739 205.784 284.955  0.00  0.00           N  
ATOM   3280  CA  GLU X 203     204.688 205.666 283.844  0.00  0.00           C  
ATOM   3281  C   GLU X 203     205.455 204.345 283.802  0.00  0.00           C  
ATOM   3282  O   GLU X 203     205.446 203.724 282.726  0.00  0.00           O  
ATOM   3283  CB  GLU X 203     205.567 206.895 283.809  0.00  0.00           C  
ATOM   3284  CG  GLU X 203     206.454 207.019 282.557  0.00  0.00           C  
ATOM   3285  CD  GLU X 203     205.759 207.191 281.173  0.00  0.00           C  
ATOM   3286  OE1 GLU X 203     206.477 207.113 280.143  0.00  0.00           O  
ATOM   3287  OE2 GLU X 203     204.573 207.579 281.066  0.00  0.00           O1-
ATOM   3288  H   GLU X 203     203.798 206.620 285.519  0.00  0.00           H  
ATOM   3289  HA  GLU X 203     204.135 205.596 282.907  0.00  0.00           H  
ATOM   3290  HB2 GLU X 203     204.782 207.649 283.873  0.00  0.00           H  
ATOM   3291  HB3 GLU X 203     206.218 206.924 284.683  0.00  0.00           H  
ATOM   3292  HG2 GLU X 203     207.182 207.809 282.745  0.00  0.00           H  
ATOM   3293  HG3 GLU X 203     207.102 206.143 282.527  0.00  0.00           H  
ATOM   3294  N   ASN X 204     205.925 203.904 284.986  0.00  0.00           N  
ATOM   3295  CA  ASN X 204     206.630 202.632 284.982  0.00  0.00           C  
ATOM   3296  C   ASN X 204     205.702 201.382 284.676  0.00  0.00           C  
ATOM   3297  O   ASN X 204     206.230 200.375 284.154  0.00  0.00           O  
ATOM   3298  CB  ASN X 204     207.432 202.485 286.262  0.00  0.00           C  
ATOM   3299  CG  ASN X 204     208.447 203.571 286.492  0.00  0.00           C  
ATOM   3300  ND2 ASN X 204     208.709 203.863 287.737  0.00  0.00           N  
ATOM   3301  OD1 ASN X 204     208.979 204.152 285.561  0.00  0.00           O  
ATOM   3302  H   ASN X 204     205.782 204.402 285.853  0.00  0.00           H  
ATOM   3303  HA  ASN X 204     207.352 202.738 284.172  0.00  0.00           H  
ATOM   3304  HB2 ASN X 204     206.765 202.447 287.123  0.00  0.00           H  
ATOM   3305  HB3 ASN X 204     207.964 201.534 286.229  0.00  0.00           H  
ATOM   3306 HD21 ASN X 204     208.270 203.314 288.462  0.00  0.00           H  
ATOM   3307 HD22 ASN X 204     209.161 204.752 287.899  0.00  0.00           H  
ATOM   3308  N   ILE X 205     204.404 201.484 284.937  0.00  0.00           N  
ATOM   3309  CA  ILE X 205     203.456 200.456 284.495  0.00  0.00           C  
ATOM   3310  C   ILE X 205     203.292 200.608 282.943  0.00  0.00           C  
ATOM   3311  O   ILE X 205     203.408 199.561 282.269  0.00  0.00           O  
ATOM   3312  CB  ILE X 205     202.190 200.630 285.214  0.00  0.00           C  
ATOM   3313  CG1 ILE X 205     202.304 200.487 286.768  0.00  0.00           C  
ATOM   3314  CG2 ILE X 205     201.015 199.750 284.832  0.00  0.00           C  
ATOM   3315  CD1 ILE X 205     202.749 199.069 287.244  0.00  0.00           C  
ATOM   3316  H   ILE X 205     204.046 202.279 285.446  0.00  0.00           H  
ATOM   3317  HA  ILE X 205     203.920 199.505 284.756  0.00  0.00           H  
ATOM   3318  HB  ILE X 205     201.997 201.701 285.151  0.00  0.00           H  
ATOM   3319 HG12 ILE X 205     202.986 201.208 287.219  0.00  0.00           H  
ATOM   3320 HG13 ILE X 205     201.317 200.679 287.188  0.00  0.00           H  
ATOM   3321 HG21 ILE X 205     200.142 200.063 285.406  0.00  0.00           H  
ATOM   3322 HG22 ILE X 205     201.275 198.708 285.020  0.00  0.00           H  
ATOM   3323 HG23 ILE X 205     200.797 199.975 283.788  0.00  0.00           H  
ATOM   3324 HD11 ILE X 205     203.731 198.773 286.876  0.00  0.00           H  
ATOM   3325 HD12 ILE X 205     202.003 198.365 286.874  0.00  0.00           H  
ATOM   3326 HD13 ILE X 205     202.793 199.031 288.333  0.00  0.00           H  
ATOM   3327  N   ARG X 206     203.086 201.790 282.371  0.00  0.00           N  
ATOM   3328  CA  ARG X 206     202.852 201.902 280.901  0.00  0.00           C  
ATOM   3329  C   ARG X 206     204.002 201.236 280.152  0.00  0.00           C  
ATOM   3330  O   ARG X 206     203.809 200.363 279.345  0.00  0.00           O  
ATOM   3331  CB  ARG X 206     202.813 203.360 280.449  0.00  0.00           C  
ATOM   3332  CG  ARG X 206     201.644 204.204 281.006  0.00  0.00           C  
ATOM   3333  CD  ARG X 206     201.752 205.655 280.720  0.00  0.00           C  
ATOM   3334  NE  ARG X 206     200.883 206.468 281.586  0.00  0.00           N  
ATOM   3335  CZ  ARG X 206     201.118 207.567 282.234  0.00  0.00           C  
ATOM   3336  NH1 ARG X 206     202.172 208.267 282.191  0.00  0.00           N1+
ATOM   3337  NH2 ARG X 206     200.262 208.017 283.105  0.00  0.00           N  
ATOM   3338  H   ARG X 206     203.066 202.603 282.970  0.00  0.00           H  
ATOM   3339  HA  ARG X 206     201.912 201.427 280.619  0.00  0.00           H  
ATOM   3340  HB2 ARG X 206     203.763 203.809 280.737  0.00  0.00           H  
ATOM   3341  HB3 ARG X 206     202.531 203.391 279.397  0.00  0.00           H  
ATOM   3342  HG2 ARG X 206     200.677 203.829 280.670  0.00  0.00           H  
ATOM   3343  HG3 ARG X 206     201.713 204.084 282.087  0.00  0.00           H  
ATOM   3344  HD2 ARG X 206     202.778 206.013 280.805  0.00  0.00           H  
ATOM   3345  HD3 ARG X 206     201.515 205.656 279.656  0.00  0.00           H  
ATOM   3346  HE  ARG X 206     199.987 206.048 281.787  0.00  0.00           H  
ATOM   3347 HH11 ARG X 206     202.886 207.854 281.608  0.00  0.00           H  
ATOM   3348 HH12 ARG X 206     202.193 209.250 282.420  0.00  0.00           H  
ATOM   3349 HH21 ARG X 206     199.424 207.520 283.371  0.00  0.00           H  
ATOM   3350 HH22 ARG X 206     200.543 208.831 283.633  0.00  0.00           H  
ATOM   3351  N   ILE X 207     205.234 201.548 280.600  0.00  0.00           N  
ATOM   3352  CA  ILE X 207     206.459 200.813 280.156  0.00  0.00           C  
ATOM   3353  C   ILE X 207     206.341 199.319 280.263  0.00  0.00           C  
ATOM   3354  O   ILE X 207     206.321 198.592 279.260  0.00  0.00           O  
ATOM   3355  CB  ILE X 207     207.739 201.327 280.901  0.00  0.00           C  
ATOM   3356  CG1 ILE X 207     208.110 202.762 280.519  0.00  0.00           C  
ATOM   3357  CG2 ILE X 207     208.933 200.439 280.417  0.00  0.00           C  
ATOM   3358  CD1 ILE X 207     208.991 203.556 281.543  0.00  0.00           C  
ATOM   3359  H   ILE X 207     205.400 202.407 281.104  0.00  0.00           H  
ATOM   3360  HA  ILE X 207     206.520 200.977 279.080  0.00  0.00           H  
ATOM   3361  HB  ILE X 207     207.644 201.199 281.979  0.00  0.00           H  
ATOM   3362 HG12 ILE X 207     208.495 202.950 279.517  0.00  0.00           H  
ATOM   3363 HG13 ILE X 207     207.178 203.325 280.461  0.00  0.00           H  
ATOM   3364 HG21 ILE X 207     208.776 199.380 280.624  0.00  0.00           H  
ATOM   3365 HG22 ILE X 207     209.856 200.720 280.924  0.00  0.00           H  
ATOM   3366 HG23 ILE X 207     208.926 200.482 279.328  0.00  0.00           H  
ATOM   3367 HD11 ILE X 207     209.405 204.475 281.129  0.00  0.00           H  
ATOM   3368 HD12 ILE X 207     209.784 202.888 281.881  0.00  0.00           H  
ATOM   3369 HD13 ILE X 207     208.337 203.749 282.393  0.00  0.00           H  
ATOM   3370  N   VAL X 208     206.210 198.791 281.473  0.00  0.00           N  
ATOM   3371  CA  VAL X 208     206.193 197.354 281.623  0.00  0.00           C  
ATOM   3372  C   VAL X 208     205.111 196.626 280.802  0.00  0.00           C  
ATOM   3373  O   VAL X 208     205.331 195.466 280.325  0.00  0.00           O  
ATOM   3374  CB  VAL X 208     206.083 196.970 283.130  0.00  0.00           C  
ATOM   3375  CG1 VAL X 208     205.584 195.596 283.474  0.00  0.00           C  
ATOM   3376  CG2 VAL X 208     207.397 197.062 283.699  0.00  0.00           C  
ATOM   3377  H   VAL X 208     206.038 199.326 282.312  0.00  0.00           H  
ATOM   3378  HA  VAL X 208     207.095 196.909 281.206  0.00  0.00           H  
ATOM   3379  HB  VAL X 208     205.507 197.696 283.705  0.00  0.00           H  
ATOM   3380 HG11 VAL X 208     204.614 195.470 282.994  0.00  0.00           H  
ATOM   3381 HG12 VAL X 208     206.251 194.798 283.150  0.00  0.00           H  
ATOM   3382 HG13 VAL X 208     205.567 195.487 284.559  0.00  0.00           H  
ATOM   3383 HG21 VAL X 208     207.337 196.883 284.772  0.00  0.00           H  
ATOM   3384 HG22 VAL X 208     207.827 198.061 283.619  0.00  0.00           H  
ATOM   3385 HG23 VAL X 208     208.054 196.333 283.225  0.00  0.00           H  
ATOM   3386  N   SER X 209     203.919 197.236 280.659  0.00  0.00           N  
ATOM   3387  CA  SER X 209     202.785 196.605 280.004  0.00  0.00           C  
ATOM   3388  C   SER X 209     202.647 196.858 278.516  0.00  0.00           C  
ATOM   3389  O   SER X 209     201.776 196.202 277.876  0.00  0.00           O  
ATOM   3390  CB  SER X 209     201.466 197.118 280.636  0.00  0.00           C  
ATOM   3391  OG  SER X 209     201.419 198.483 280.452  0.00  0.00           O  
ATOM   3392  H   SER X 209     203.865 198.139 281.108  0.00  0.00           H  
ATOM   3393  HA  SER X 209     202.769 195.518 280.081  0.00  0.00           H  
ATOM   3394  HB2 SER X 209     200.698 196.537 280.127  0.00  0.00           H  
ATOM   3395  HB3 SER X 209     201.264 196.708 281.625  0.00  0.00           H  
ATOM   3396  HG  SER X 209     202.044 198.826 281.095  0.00  0.00           H  
ATOM   3397  N   THR X 210     203.641 197.512 277.930  0.00  0.00           N  
ATOM   3398  CA  THR X 210     203.779 197.644 276.472  0.00  0.00           C  
ATOM   3399  C   THR X 210     204.429 196.344 275.919  0.00  0.00           C  
ATOM   3400  O   THR X 210     205.448 195.850 276.492  0.00  0.00           O  
ATOM   3401  CB  THR X 210     204.712 198.780 276.138  0.00  0.00           C  
ATOM   3402  CG2 THR X 210     204.810 198.973 274.642  0.00  0.00           C  
ATOM   3403  OG1 THR X 210     204.127 199.932 276.696  0.00  0.00           O  
ATOM   3404  H   THR X 210     204.375 197.889 278.513  0.00  0.00           H  
ATOM   3405  HA  THR X 210     202.783 197.777 276.049  0.00  0.00           H  
ATOM   3406  HB  THR X 210     205.711 198.551 276.509  0.00  0.00           H  
ATOM   3407  HG1 THR X 210     204.235 199.913 277.650  0.00  0.00           H  
ATOM   3408 HG21 THR X 210     205.487 199.819 274.525  0.00  0.00           H  
ATOM   3409 HG22 THR X 210     203.851 199.240 274.198  0.00  0.00           H  
ATOM   3410 HG23 THR X 210     205.218 198.058 274.212  0.00  0.00           H  
ATOM   3411  N   PRO X 211     203.940 195.622 274.883  0.00  0.00           N  
ATOM   3412  CA  PRO X 211     204.421 194.368 274.276  0.00  0.00           C  
ATOM   3413  C   PRO X 211     205.886 194.496 273.783  0.00  0.00           C  
ATOM   3414  O   PRO X 211     206.578 193.516 273.827  0.00  0.00           O  
ATOM   3415  CB  PRO X 211     203.395 194.036 273.154  0.00  0.00           C  
ATOM   3416  CG  PRO X 211     202.108 194.651 273.681  0.00  0.00           C  
ATOM   3417  CD  PRO X 211     202.583 195.905 274.354  0.00  0.00           C  
ATOM   3418  HA  PRO X 211     204.337 193.635 275.079  0.00  0.00           H  
ATOM   3419  HB2 PRO X 211     203.644 194.464 272.183  0.00  0.00           H  
ATOM   3420  HB3 PRO X 211     203.392 192.951 273.053  0.00  0.00           H  
ATOM   3421  HG2 PRO X 211     201.276 194.751 272.984  0.00  0.00           H  
ATOM   3422  HG3 PRO X 211     201.748 194.010 274.486  0.00  0.00           H  
ATOM   3423  HD2 PRO X 211     202.503 196.791 273.725  0.00  0.00           H  
ATOM   3424  HD3 PRO X 211     201.828 196.145 275.102  0.00  0.00           H  
ATOM   3425  N   TRP X 212     206.382 195.664 273.415  0.00  0.00           N  
ATOM   3426  CA  TRP X 212     207.787 195.869 273.056  0.00  0.00           C  
ATOM   3427  C   TRP X 212     208.783 195.262 274.099  0.00  0.00           C  
ATOM   3428  O   TRP X 212     209.788 194.626 273.785  0.00  0.00           O  
ATOM   3429  CB  TRP X 212     208.068 197.349 272.828  0.00  0.00           C  
ATOM   3430  CG  TRP X 212     209.559 197.701 272.642  0.00  0.00           C  
ATOM   3431  CD1 TRP X 212     210.297 198.523 273.438  0.00  0.00           C  
ATOM   3432  CD2 TRP X 212     210.495 197.308 271.576  0.00  0.00           C  
ATOM   3433  CE2 TRP X 212     211.778 197.779 271.969  0.00  0.00           C  
ATOM   3434  CE3 TRP X 212     210.431 196.476 270.431  0.00  0.00           C  
ATOM   3435  NE1 TRP X 212     211.601 198.560 273.066  0.00  0.00           N  
ATOM   3436  CZ2 TRP X 212     212.900 197.548 271.198  0.00  0.00           C  
ATOM   3437  CZ3 TRP X 212     211.547 196.294 269.620  0.00  0.00           C  
ATOM   3438  CH2 TRP X 212     212.822 196.808 269.964  0.00  0.00           C  
ATOM   3439  H   TRP X 212     205.785 196.475 273.338  0.00  0.00           H  
ATOM   3440  HA  TRP X 212     207.969 195.463 272.061  0.00  0.00           H  
ATOM   3441  HB2 TRP X 212     207.457 197.660 271.981  0.00  0.00           H  
ATOM   3442  HB3 TRP X 212     207.668 197.952 273.643  0.00  0.00           H  
ATOM   3443  HD1 TRP X 212     209.918 199.045 274.304  0.00  0.00           H  
ATOM   3444  HE1 TRP X 212     212.268 199.060 273.636  0.00  0.00           H  
ATOM   3445  HE3 TRP X 212     209.583 195.887 270.116  0.00  0.00           H  
ATOM   3446  HZ2 TRP X 212     213.808 197.958 271.616  0.00  0.00           H  
ATOM   3447  HZ3 TRP X 212     211.396 195.790 268.677  0.00  0.00           H  
ATOM   3448  HH2 TRP X 212     213.687 196.673 269.331  0.00  0.00           H  
ATOM   3449  N   ILE X 213     208.461 195.388 275.411  0.00  0.00           N  
ATOM   3450  CA  ILE X 213     209.318 194.918 276.521  0.00  0.00           C  
ATOM   3451  C   ILE X 213     209.311 193.350 276.671  0.00  0.00           C  
ATOM   3452  O   ILE X 213     210.294 192.734 276.933  0.00  0.00           O  
ATOM   3453  CB  ILE X 213     208.924 195.611 277.856  0.00  0.00           C  
ATOM   3454  CG1 ILE X 213     209.275 197.152 277.859  0.00  0.00           C  
ATOM   3455  CG2 ILE X 213     209.719 195.002 278.992  0.00  0.00           C  
ATOM   3456  CD1 ILE X 213     208.819 198.095 276.708  0.00  0.00           C  
ATOM   3457  H   ILE X 213     207.797 196.134 275.560  0.00  0.00           H  
ATOM   3458  HA  ILE X 213     210.325 195.226 276.238  0.00  0.00           H  
ATOM   3459  HB  ILE X 213     207.860 195.481 278.051  0.00  0.00           H  
ATOM   3460 HG12 ILE X 213     208.968 197.633 278.788  0.00  0.00           H  
ATOM   3461 HG13 ILE X 213     210.358 197.234 277.760  0.00  0.00           H  
ATOM   3462 HG21 ILE X 213     209.591 193.931 279.149  0.00  0.00           H  
ATOM   3463 HG22 ILE X 213     209.342 195.538 279.863  0.00  0.00           H  
ATOM   3464 HG23 ILE X 213     210.787 195.104 278.804  0.00  0.00           H  
ATOM   3465 HD11 ILE X 213     208.950 199.128 277.028  0.00  0.00           H  
ATOM   3466 HD12 ILE X 213     207.766 197.896 276.509  0.00  0.00           H  
ATOM   3467 HD13 ILE X 213     209.439 197.884 275.837  0.00  0.00           H  
ATOM   3468  N   GLN X 214     208.172 192.722 276.350  0.00  0.00           N  
ATOM   3469  CA  GLN X 214     208.079 191.322 276.159  0.00  0.00           C  
ATOM   3470  C   GLN X 214     208.821 190.863 274.861  0.00  0.00           C  
ATOM   3471  O   GLN X 214     209.426 189.773 274.873  0.00  0.00           O  
ATOM   3472  CB  GLN X 214     206.624 190.839 276.314  0.00  0.00           C  
ATOM   3473  CG  GLN X 214     206.520 189.309 276.593  0.00  0.00           C  
ATOM   3474  CD  GLN X 214     207.213 188.793 277.880  0.00  0.00           C  
ATOM   3475  NE2 GLN X 214     207.321 187.512 277.925  0.00  0.00           N  
ATOM   3476  OE1 GLN X 214     207.431 189.506 278.898  0.00  0.00           O  
ATOM   3477  H   GLN X 214     207.418 193.342 276.090  0.00  0.00           H  
ATOM   3478  HA  GLN X 214     208.676 190.788 276.898  0.00  0.00           H  
ATOM   3479  HB2 GLN X 214     206.051 191.392 277.059  0.00  0.00           H  
ATOM   3480  HB3 GLN X 214     206.104 190.924 275.360  0.00  0.00           H  
ATOM   3481  HG2 GLN X 214     205.527 188.858 276.602  0.00  0.00           H  
ATOM   3482  HG3 GLN X 214     206.955 188.789 275.739  0.00  0.00           H  
ATOM   3483 HE21 GLN X 214     207.594 187.096 278.803  0.00  0.00           H  
ATOM   3484 HE22 GLN X 214     207.218 186.898 277.129  0.00  0.00           H  
ATOM   3485  N   ILE X 215     208.807 191.584 273.703  0.00  0.00           N  
ATOM   3486  CA  ILE X 215     209.708 191.298 272.505  0.00  0.00           C  
ATOM   3487  C   ILE X 215     211.183 191.329 272.948  0.00  0.00           C  
ATOM   3488  O   ILE X 215     211.938 190.451 272.718  0.00  0.00           O  
ATOM   3489  CB  ILE X 215     209.348 192.176 271.318  0.00  0.00           C  
ATOM   3490  CG1 ILE X 215     207.956 191.696 270.737  0.00  0.00           C  
ATOM   3491  CG2 ILE X 215     210.427 192.214 270.238  0.00  0.00           C  
ATOM   3492  CD1 ILE X 215     207.110 192.717 269.943  0.00  0.00           C  
ATOM   3493  H   ILE X 215     208.180 192.374 273.651  0.00  0.00           H  
ATOM   3494  HA  ILE X 215     209.626 190.276 272.134  0.00  0.00           H  
ATOM   3495  HB  ILE X 215     209.157 193.204 271.628  0.00  0.00           H  
ATOM   3496 HG12 ILE X 215     208.120 190.736 270.246  0.00  0.00           H  
ATOM   3497 HG13 ILE X 215     207.394 191.398 271.622  0.00  0.00           H  
ATOM   3498 HG21 ILE X 215     210.090 192.884 269.446  0.00  0.00           H  
ATOM   3499 HG22 ILE X 215     210.664 191.230 269.832  0.00  0.00           H  
ATOM   3500 HG23 ILE X 215     211.292 192.793 270.559  0.00  0.00           H  
ATOM   3501 HD11 ILE X 215     206.911 193.487 270.688  0.00  0.00           H  
ATOM   3502 HD12 ILE X 215     206.142 192.246 269.773  0.00  0.00           H  
ATOM   3503 HD13 ILE X 215     207.670 193.033 269.063  0.00  0.00           H  
ATOM   3504  N   CYS X 216     211.587 192.316 273.764  0.00  0.00           N  
ATOM   3505  CA  CYS X 216     212.978 192.551 274.207  0.00  0.00           C  
ATOM   3506  C   CYS X 216     213.376 191.459 275.163  0.00  0.00           C  
ATOM   3507  O   CYS X 216     214.490 191.063 275.180  0.00  0.00           O  
ATOM   3508  CB  CYS X 216     213.112 193.903 275.007  0.00  0.00           C  
ATOM   3509  SG  CYS X 216     213.060 195.244 273.781  0.00  0.00           S  
ATOM   3510  H   CYS X 216     210.934 193.046 274.012  0.00  0.00           H  
ATOM   3511  HA  CYS X 216     213.716 192.441 273.413  0.00  0.00           H  
ATOM   3512  HB2 CYS X 216     212.322 194.156 275.714  0.00  0.00           H  
ATOM   3513  HB3 CYS X 216     214.100 193.905 275.469  0.00  0.00           H  
ATOM   3514  HG  CYS X 216     211.819 194.926 273.402  0.00  0.00           H  
ATOM   3515  N   ASN X 217     212.389 190.945 275.914  0.00  0.00           N  
ATOM   3516  CA  ASN X 217     212.593 189.722 276.675  0.00  0.00           C  
ATOM   3517  C   ASN X 217     212.727 188.404 275.803  0.00  0.00           C  
ATOM   3518  O   ASN X 217     213.030 187.374 276.310  0.00  0.00           O  
ATOM   3519  CB  ASN X 217     211.458 189.731 277.626  0.00  0.00           C  
ATOM   3520  CG  ASN X 217     211.662 189.066 278.957  0.00  0.00           C  
ATOM   3521  ND2 ASN X 217     210.610 188.823 279.727  0.00  0.00           N  
ATOM   3522  OD1 ASN X 217     212.716 188.940 279.500  0.00  0.00           O  
ATOM   3523  H   ASN X 217     211.440 191.290 275.920  0.00  0.00           H  
ATOM   3524  HA  ASN X 217     213.498 189.837 277.270  0.00  0.00           H  
ATOM   3525  HB2 ASN X 217     211.115 190.720 277.931  0.00  0.00           H  
ATOM   3526  HB3 ASN X 217     210.613 189.267 277.116  0.00  0.00           H  
ATOM   3527 HD21 ASN X 217     209.689 188.812 279.312  0.00  0.00           H  
ATOM   3528 HD22 ASN X 217     210.722 188.488 280.673  0.00  0.00           H  
ATOM   3529  N   ASN X 218     212.539 188.397 274.492  0.00  0.00           N  
ATOM   3530  CA  ASN X 218     212.967 187.291 273.619  0.00  0.00           C  
ATOM   3531  C   ASN X 218     214.516 187.285 273.456  0.00  0.00           C  
ATOM   3532  O   ASN X 218     215.116 186.285 273.158  0.00  0.00           O  
ATOM   3533  CB  ASN X 218     212.122 187.353 272.264  0.00  0.00           C  
ATOM   3534  CG  ASN X 218     211.640 186.035 271.737  0.00  0.00           C  
ATOM   3535  ND2 ASN X 218     210.682 185.404 272.431  0.00  0.00           N  
ATOM   3536  OD1 ASN X 218     212.039 185.555 270.694  0.00  0.00           O  
ATOM   3537  H   ASN X 218     212.458 189.304 274.053  0.00  0.00           H  
ATOM   3538  HA  ASN X 218     212.769 186.347 274.127  0.00  0.00           H  
ATOM   3539  HB2 ASN X 218     211.243 187.997 272.287  0.00  0.00           H  
ATOM   3540  HB3 ASN X 218     212.730 187.744 271.447  0.00  0.00           H  
ATOM   3541 HD21 ASN X 218     210.341 185.783 273.303  0.00  0.00           H  
ATOM   3542 HD22 ASN X 218     210.374 184.495 272.117  0.00  0.00           H  
ATOM   3543  N   PHE X 219     215.253 188.422 273.678  0.00  0.00           N  
ATOM   3544  CA  PHE X 219     216.669 188.629 273.588  0.00  0.00           C  
ATOM   3545  C   PHE X 219     217.108 189.986 274.177  0.00  0.00           C  
ATOM   3546  O   PHE X 219     217.346 190.958 273.468  0.00  0.00           O  
ATOM   3547  CB  PHE X 219     217.224 188.486 272.143  0.00  0.00           C  
ATOM   3548  CG  PHE X 219     216.431 189.091 270.941  0.00  0.00           C  
ATOM   3549  CD1 PHE X 219     215.475 190.152 271.041  0.00  0.00           C  
ATOM   3550  CD2 PHE X 219     216.552 188.537 269.641  0.00  0.00           C  
ATOM   3551  CE1 PHE X 219     214.731 190.630 269.925  0.00  0.00           C  
ATOM   3552  CE2 PHE X 219     215.728 188.885 268.521  0.00  0.00           C  
ATOM   3553  CZ  PHE X 219     214.839 189.953 268.707  0.00  0.00           C  
ATOM   3554  H   PHE X 219     214.724 189.280 273.746  0.00  0.00           H  
ATOM   3555  HA  PHE X 219     217.190 187.894 274.202  0.00  0.00           H  
ATOM   3556  HB2 PHE X 219     218.225 188.917 272.154  0.00  0.00           H  
ATOM   3557  HB3 PHE X 219     217.477 187.457 271.889  0.00  0.00           H  
ATOM   3558  HD1 PHE X 219     215.379 190.896 271.818  0.00  0.00           H  
ATOM   3559  HD2 PHE X 219     217.311 187.779 269.519  0.00  0.00           H  
ATOM   3560  HE1 PHE X 219     213.975 191.395 270.031  0.00  0.00           H  
ATOM   3561  HE2 PHE X 219     215.934 188.367 267.596  0.00  0.00           H  
ATOM   3562  HZ  PHE X 219     214.201 190.241 267.885  0.00  0.00           H  
ATOM   3563  N   PRO X 220     217.374 190.118 275.552  0.00  0.00           N  
ATOM   3564  CA  PRO X 220     217.616 191.369 276.220  0.00  0.00           C  
ATOM   3565  C   PRO X 220     218.839 192.150 275.789  0.00  0.00           C  
ATOM   3566  O   PRO X 220     218.999 193.320 276.192  0.00  0.00           O  
ATOM   3567  CB  PRO X 220     217.738 191.031 277.753  0.00  0.00           C  
ATOM   3568  CG  PRO X 220     217.106 189.549 277.936  0.00  0.00           C  
ATOM   3569  CD  PRO X 220     217.357 189.036 276.464  0.00  0.00           C  
ATOM   3570  HA  PRO X 220     216.738 192.013 276.169  0.00  0.00           H  
ATOM   3571  HB2 PRO X 220     218.796 191.096 278.008  0.00  0.00           H  
ATOM   3572  HB3 PRO X 220     217.083 191.686 278.326  0.00  0.00           H  
ATOM   3573  HG2 PRO X 220     217.696 188.965 278.643  0.00  0.00           H  
ATOM   3574  HG3 PRO X 220     216.026 189.602 278.078  0.00  0.00           H  
ATOM   3575  HD2 PRO X 220     218.223 188.380 276.553  0.00  0.00           H  
ATOM   3576  HD3 PRO X 220     216.585 188.353 276.109  0.00  0.00           H  
ATOM   3577  N   THR X 221     219.709 191.526 274.991  0.00  0.00           N  
ATOM   3578  CA  THR X 221     220.881 192.175 274.363  0.00  0.00           C  
ATOM   3579  C   THR X 221     220.460 193.438 273.575  0.00  0.00           C  
ATOM   3580  O   THR X 221     221.138 194.465 273.575  0.00  0.00           O  
ATOM   3581  CB  THR X 221     221.700 191.256 273.414  0.00  0.00           C  
ATOM   3582  CG2 THR X 221     222.732 192.025 272.634  0.00  0.00           C  
ATOM   3583  OG1 THR X 221     222.386 190.264 274.211  0.00  0.00           O  
ATOM   3584  H   THR X 221     219.631 190.535 274.812  0.00  0.00           H  
ATOM   3585  HA  THR X 221     221.640 192.564 275.042  0.00  0.00           H  
ATOM   3586  HB  THR X 221     221.103 190.710 272.684  0.00  0.00           H  
ATOM   3587  HG1 THR X 221     221.734 189.600 274.446  0.00  0.00           H  
ATOM   3588 HG21 THR X 221     222.200 192.453 271.785  0.00  0.00           H  
ATOM   3589 HG22 THR X 221     223.435 191.473 272.010  0.00  0.00           H  
ATOM   3590 HG23 THR X 221     223.124 192.863 273.210  0.00  0.00           H  
ATOM   3591  N   ILE X 222     219.231 193.418 273.121  0.00  0.00           N  
ATOM   3592  CA  ILE X 222     218.580 194.444 272.211  0.00  0.00           C  
ATOM   3593  C   ILE X 222     218.573 195.762 272.815  0.00  0.00           C  
ATOM   3594  O   ILE X 222     218.558 196.828 272.189  0.00  0.00           O  
ATOM   3595  CB  ILE X 222     217.202 193.960 271.688  0.00  0.00           C  
ATOM   3596  CG1 ILE X 222     216.606 194.974 270.641  0.00  0.00           C  
ATOM   3597  CG2 ILE X 222     216.263 193.852 272.925  0.00  0.00           C  
ATOM   3598  CD1 ILE X 222     215.547 194.407 269.725  0.00  0.00           C  
ATOM   3599  H   ILE X 222     218.692 192.576 273.265  0.00  0.00           H  
ATOM   3600  HA  ILE X 222     219.212 194.493 271.325  0.00  0.00           H  
ATOM   3601  HB  ILE X 222     217.248 192.981 271.210  0.00  0.00           H  
ATOM   3602 HG12 ILE X 222     216.167 195.808 271.188  0.00  0.00           H  
ATOM   3603 HG13 ILE X 222     217.430 195.372 270.050  0.00  0.00           H  
ATOM   3604 HG21 ILE X 222     216.750 193.269 273.708  0.00  0.00           H  
ATOM   3605 HG22 ILE X 222     215.452 193.241 272.531  0.00  0.00           H  
ATOM   3606 HG23 ILE X 222     215.952 194.809 273.343  0.00  0.00           H  
ATOM   3607 HD11 ILE X 222     214.736 194.130 270.398  0.00  0.00           H  
ATOM   3608 HD12 ILE X 222     215.926 193.520 269.219  0.00  0.00           H  
ATOM   3609 HD13 ILE X 222     215.120 195.040 268.947  0.00  0.00           H  
ATOM   3610  N   ILE X 223     218.538 195.920 274.114  0.00  0.00           N  
ATOM   3611  CA  ILE X 223     218.626 197.198 274.878  0.00  0.00           C  
ATOM   3612  C   ILE X 223     220.039 197.784 274.841  0.00  0.00           C  
ATOM   3613  O   ILE X 223     220.161 198.947 275.124  0.00  0.00           O  
ATOM   3614  CB  ILE X 223     218.222 197.008 276.367  0.00  0.00           C  
ATOM   3615  CG1 ILE X 223     216.848 196.285 276.605  0.00  0.00           C  
ATOM   3616  CG2 ILE X 223     218.186 198.297 277.229  0.00  0.00           C  
ATOM   3617  CD1 ILE X 223     215.491 196.888 276.333  0.00  0.00           C  
ATOM   3618  H   ILE X 223     218.601 195.048 274.620  0.00  0.00           H  
ATOM   3619  HA  ILE X 223     217.949 197.980 274.533  0.00  0.00           H  
ATOM   3620  HB  ILE X 223     218.906 196.296 276.828  0.00  0.00           H  
ATOM   3621 HG12 ILE X 223     216.897 195.373 276.009  0.00  0.00           H  
ATOM   3622 HG13 ILE X 223     216.745 195.926 277.629  0.00  0.00           H  
ATOM   3623 HG21 ILE X 223     217.466 198.987 276.789  0.00  0.00           H  
ATOM   3624 HG22 ILE X 223     219.147 198.721 277.520  0.00  0.00           H  
ATOM   3625 HG23 ILE X 223     217.782 198.036 278.207  0.00  0.00           H  
ATOM   3626 HD11 ILE X 223     215.296 197.741 276.982  0.00  0.00           H  
ATOM   3627 HD12 ILE X 223     214.763 196.123 276.605  0.00  0.00           H  
ATOM   3628 HD13 ILE X 223     215.441 197.181 275.285  0.00  0.00           H  
ATOM   3629  N   ASP X 224     221.123 197.110 274.588  0.00  0.00           N  
ATOM   3630  CA  ASP X 224     222.407 197.793 274.177  0.00  0.00           C  
ATOM   3631  C   ASP X 224     222.300 198.633 272.888  0.00  0.00           C  
ATOM   3632  O   ASP X 224     223.086 199.501 272.731  0.00  0.00           O  
ATOM   3633  CB  ASP X 224     223.483 196.738 274.038  0.00  0.00           C  
ATOM   3634  CG  ASP X 224     223.850 196.089 275.367  0.00  0.00           C  
ATOM   3635  OD1 ASP X 224     224.644 195.099 275.382  0.00  0.00           O  
ATOM   3636  OD2 ASP X 224     223.649 196.680 276.454  0.00  0.00           O1-
ATOM   3637  H   ASP X 224     221.022 196.118 274.430  0.00  0.00           H  
ATOM   3638  HA  ASP X 224     222.652 198.525 274.946  0.00  0.00           H  
ATOM   3639  HB2 ASP X 224     223.320 195.943 273.311  0.00  0.00           H  
ATOM   3640  HB3 ASP X 224     224.412 197.267 273.826  0.00  0.00           H  
ATOM   3641  N   TYR X 225     221.348 198.287 271.985  0.00  0.00           N  
ATOM   3642  CA  TYR X 225     220.968 199.123 270.812  0.00  0.00           C  
ATOM   3643  C   TYR X 225     219.903 200.149 270.952  0.00  0.00           C  
ATOM   3644  O   TYR X 225     219.706 201.060 270.142  0.00  0.00           O  
ATOM   3645  CB  TYR X 225     220.641 198.124 269.681  0.00  0.00           C  
ATOM   3646  CG  TYR X 225     221.784 197.235 269.167  0.00  0.00           C  
ATOM   3647  CD1 TYR X 225     222.405 197.502 267.952  0.00  0.00           C  
ATOM   3648  CD2 TYR X 225     222.139 196.135 269.963  0.00  0.00           C  
ATOM   3649  CE1 TYR X 225     223.228 196.472 267.354  0.00  0.00           C  
ATOM   3650  CE2 TYR X 225     223.002 195.149 269.468  0.00  0.00           C  
ATOM   3651  CZ  TYR X 225     223.524 195.365 268.131  0.00  0.00           C  
ATOM   3652  OH  TYR X 225     224.288 194.379 267.613  0.00  0.00           O  
ATOM   3653  H   TYR X 225     220.658 197.612 272.283  0.00  0.00           H  
ATOM   3654  HA  TYR X 225     221.827 199.749 270.569  0.00  0.00           H  
ATOM   3655  HB2 TYR X 225     219.862 197.434 270.005  0.00  0.00           H  
ATOM   3656  HB3 TYR X 225     220.252 198.639 268.803  0.00  0.00           H  
ATOM   3657  HD1 TYR X 225     221.971 198.346 267.437  0.00  0.00           H  
ATOM   3658  HD2 TYR X 225     221.746 195.767 270.899  0.00  0.00           H  
ATOM   3659  HE1 TYR X 225     223.731 196.544 266.401  0.00  0.00           H  
ATOM   3660  HE2 TYR X 225     223.156 194.189 269.939  0.00  0.00           H  
ATOM   3661  HH  TYR X 225     224.436 193.724 268.299  0.00  0.00           H  
ATOM   3662  N   PHE X 226     219.166 200.098 272.054  0.00  0.00           N  
ATOM   3663  CA  PHE X 226     217.927 200.892 272.310  0.00  0.00           C  
ATOM   3664  C   PHE X 226     217.759 201.265 273.856  0.00  0.00           C  
ATOM   3665  O   PHE X 226     216.860 200.656 274.524  0.00  0.00           O  
ATOM   3666  CB  PHE X 226     216.759 200.092 271.775  0.00  0.00           C  
ATOM   3667  CG  PHE X 226     216.569 199.883 270.264  0.00  0.00           C  
ATOM   3668  CD1 PHE X 226     216.246 198.586 269.799  0.00  0.00           C  
ATOM   3669  CD2 PHE X 226     216.745 200.917 269.303  0.00  0.00           C  
ATOM   3670  CE1 PHE X 226     216.078 198.389 268.421  0.00  0.00           C  
ATOM   3671  CE2 PHE X 226     216.459 200.711 267.956  0.00  0.00           C  
ATOM   3672  CZ  PHE X 226     216.183 199.415 267.497  0.00  0.00           C  
ATOM   3673  H   PHE X 226     219.256 199.290 272.653  0.00  0.00           H  
ATOM   3674  HA  PHE X 226     217.949 201.855 271.798  0.00  0.00           H  
ATOM   3675  HB2 PHE X 226     216.732 199.167 272.350  0.00  0.00           H  
ATOM   3676  HB3 PHE X 226     215.808 200.539 272.064  0.00  0.00           H  
ATOM   3677  HD1 PHE X 226     216.137 197.747 270.470  0.00  0.00           H  
ATOM   3678  HD2 PHE X 226     217.029 201.887 269.685  0.00  0.00           H  
ATOM   3679  HE1 PHE X 226     215.847 197.398 268.060  0.00  0.00           H  
ATOM   3680  HE2 PHE X 226     216.561 201.584 267.327  0.00  0.00           H  
ATOM   3681  HZ  PHE X 226     216.205 199.141 266.453  0.00  0.00           H  
ATOM   3682  N   PRO X 227     218.619 202.088 274.430  0.00  0.00           N  
ATOM   3683  CA  PRO X 227     218.656 202.385 275.892  0.00  0.00           C  
ATOM   3684  C   PRO X 227     217.832 203.559 276.194  0.00  0.00           C  
ATOM   3685  O   PRO X 227     217.970 204.046 277.330  0.00  0.00           O  
ATOM   3686  CB  PRO X 227     220.130 202.670 276.119  0.00  0.00           C  
ATOM   3687  CG  PRO X 227     220.496 203.475 274.830  0.00  0.00           C  
ATOM   3688  CD  PRO X 227     219.672 202.842 273.733  0.00  0.00           C  
ATOM   3689  HA  PRO X 227     218.333 201.548 276.512  0.00  0.00           H  
ATOM   3690  HB2 PRO X 227     220.368 203.233 277.022  0.00  0.00           H  
ATOM   3691  HB3 PRO X 227     220.669 201.723 276.119  0.00  0.00           H  
ATOM   3692  HG2 PRO X 227     220.224 204.508 275.044  0.00  0.00           H  
ATOM   3693  HG3 PRO X 227     221.574 203.378 274.698  0.00  0.00           H  
ATOM   3694  HD2 PRO X 227     219.281 203.702 273.190  0.00  0.00           H  
ATOM   3695  HD3 PRO X 227     220.355 202.251 273.124  0.00  0.00           H  
ATOM   3696  N   GLY X 228     216.911 203.972 275.347  0.00  0.00           N  
ATOM   3697  CA  GLY X 228     216.144 205.190 275.574  0.00  0.00           C  
ATOM   3698  C   GLY X 228     215.237 205.052 276.773  0.00  0.00           C  
ATOM   3699  O   GLY X 228     215.308 205.769 277.761  0.00  0.00           O  
ATOM   3700  H   GLY X 228     216.687 203.496 274.485  0.00  0.00           H  
ATOM   3701  HA2 GLY X 228     216.779 206.046 275.802  0.00  0.00           H  
ATOM   3702  HA3 GLY X 228     215.549 205.398 274.685  0.00  0.00           H  
ATOM   3703  N   THR X 229     214.376 204.009 276.664  0.00  0.00           N  
ATOM   3704  CA  THR X 229     213.285 203.756 277.492  0.00  0.00           C  
ATOM   3705  C   THR X 229     213.796 203.303 278.865  0.00  0.00           C  
ATOM   3706  O   THR X 229     213.124 203.710 279.821  0.00  0.00           O  
ATOM   3707  CB  THR X 229     212.321 202.751 276.871  0.00  0.00           C  
ATOM   3708  CG2 THR X 229     211.144 202.363 277.755  0.00  0.00           C  
ATOM   3709  OG1 THR X 229     211.936 203.293 275.616  0.00  0.00           O  
ATOM   3710  H   THR X 229     214.410 203.430 275.837  0.00  0.00           H  
ATOM   3711  HA  THR X 229     212.837 204.729 277.694  0.00  0.00           H  
ATOM   3712  HB  THR X 229     212.947 201.866 276.754  0.00  0.00           H  
ATOM   3713  HG1 THR X 229     212.494 202.853 274.970  0.00  0.00           H  
ATOM   3714 HG21 THR X 229     211.322 201.852 278.701  0.00  0.00           H  
ATOM   3715 HG22 THR X 229     210.440 201.733 277.211  0.00  0.00           H  
ATOM   3716 HG23 THR X 229     210.539 203.211 278.076  0.00  0.00           H  
ATOM   3717  N   HIE X 230     214.908 202.546 278.947  0.00  0.00           N  
ATOM   3718  CA  HIE X 230     215.546 202.221 280.235  0.00  0.00           C  
ATOM   3719  C   HIE X 230     216.111 203.490 280.886  0.00  0.00           C  
ATOM   3720  O   HIE X 230     215.875 203.587 282.099  0.00  0.00           O  
ATOM   3721  CB  HIE X 230     216.632 201.184 279.938  0.00  0.00           C  
ATOM   3722  CG  HIE X 230     217.463 200.772 281.166  0.00  0.00           C  
ATOM   3723  CD2 HIE X 230     218.783 200.961 281.456  0.00  0.00           C  
ATOM   3724  ND1 HIE X 230     216.863 200.324 282.355  0.00  0.00           N  
ATOM   3725  CE1 HIE X 230     217.768 200.281 283.308  0.00  0.00           C  
ATOM   3726  NE2 HIE X 230     218.932 200.623 282.822  0.00  0.00           N  
ATOM   3727  H   HIE X 230     215.231 202.087 278.107  0.00  0.00           H  
ATOM   3728  HA  HIE X 230     214.841 201.829 280.969  0.00  0.00           H  
ATOM   3729  HB2 HIE X 230     216.245 200.286 279.457  0.00  0.00           H  
ATOM   3730  HB3 HIE X 230     217.300 201.623 279.196  0.00  0.00           H  
ATOM   3731  HD2 HIE X 230     219.524 201.492 280.876  0.00  0.00           H  
ATOM   3732  HE1 HIE X 230     217.569 199.809 284.258  0.00  0.00           H  
ATOM   3733  HE2 HIE X 230     219.724 200.467 283.429  0.00  0.00           H  
ATOM   3734  N   ASN X 231     216.758 204.451 280.206  0.00  0.00           N  
ATOM   3735  CA  ASN X 231     217.070 205.660 281.003  0.00  0.00           C  
ATOM   3736  C   ASN X 231     215.852 206.348 281.503  0.00  0.00           C  
ATOM   3737  O   ASN X 231     215.952 207.135 282.496  0.00  0.00           O  
ATOM   3738  CB  ASN X 231     217.955 206.559 280.145  0.00  0.00           C  
ATOM   3739  CG  ASN X 231     219.442 206.209 280.169  0.00  0.00           C  
ATOM   3740  ND2 ASN X 231     220.110 205.912 279.087  0.00  0.00           N  
ATOM   3741  OD1 ASN X 231     220.088 206.265 281.203  0.00  0.00           O  
ATOM   3742  H   ASN X 231     216.826 204.294 279.210  0.00  0.00           H  
ATOM   3743  HA  ASN X 231     217.545 205.459 281.963  0.00  0.00           H  
ATOM   3744  HB2 ASN X 231     217.565 206.614 279.129  0.00  0.00           H  
ATOM   3745  HB3 ASN X 231     217.929 207.586 280.511  0.00  0.00           H  
ATOM   3746 HD21 ASN X 231     219.639 205.523 278.283  0.00  0.00           H  
ATOM   3747 HD22 ASN X 231     221.119 205.913 279.045  0.00  0.00           H  
ATOM   3748  N   LYS X 232     214.626 206.204 280.892  0.00  0.00           N  
ATOM   3749  CA  LYS X 232     213.456 206.900 281.447  0.00  0.00           C  
ATOM   3750  C   LYS X 232     212.999 206.206 282.713  0.00  0.00           C  
ATOM   3751  O   LYS X 232     212.404 206.981 283.517  0.00  0.00           O  
ATOM   3752  CB  LYS X 232     212.407 207.033 280.399  0.00  0.00           C  
ATOM   3753  CG  LYS X 232     211.143 207.836 280.816  0.00  0.00           C  
ATOM   3754  CD  LYS X 232     210.283 207.987 279.504  0.00  0.00           C  
ATOM   3755  CE  LYS X 232     209.308 209.108 279.725  0.00  0.00           C  
ATOM   3756  NZ  LYS X 232     207.981 208.982 279.033  0.00  0.00           N1+
ATOM   3757  H   LYS X 232     214.464 205.547 280.142  0.00  0.00           H  
ATOM   3758  HA  LYS X 232     213.694 207.953 281.599  0.00  0.00           H  
ATOM   3759  HB2 LYS X 232     212.885 207.602 279.601  0.00  0.00           H  
ATOM   3760  HB3 LYS X 232     212.051 206.037 280.137  0.00  0.00           H  
ATOM   3761  HG2 LYS X 232     210.571 207.247 281.533  0.00  0.00           H  
ATOM   3762  HG3 LYS X 232     211.512 208.794 281.181  0.00  0.00           H  
ATOM   3763  HD2 LYS X 232     210.789 208.055 278.541  0.00  0.00           H  
ATOM   3764  HD3 LYS X 232     209.691 207.106 279.256  0.00  0.00           H  
ATOM   3765  HE2 LYS X 232     209.091 209.100 280.793  0.00  0.00           H  
ATOM   3766  HE3 LYS X 232     209.737 210.088 279.512  0.00  0.00           H  
ATOM   3767  HZ1 LYS X 232     207.229 208.598 279.587  0.00  0.00           H  
ATOM   3768  HZ2 LYS X 232     208.047 208.390 278.218  0.00  0.00           H  
ATOM   3769  HZ3 LYS X 232     207.564 209.864 278.775  0.00  0.00           H  
ATOM   3770  N   LEU X 233     213.164 204.869 282.802  0.00  0.00           N  
ATOM   3771  CA  LEU X 233     212.990 204.170 284.047  0.00  0.00           C  
ATOM   3772  C   LEU X 233     213.967 204.635 285.157  0.00  0.00           C  
ATOM   3773  O   LEU X 233     213.538 204.951 286.259  0.00  0.00           O  
ATOM   3774  CB  LEU X 233     212.932 202.658 283.877  0.00  0.00           C  
ATOM   3775  CG  LEU X 233     212.905 201.799 285.208  0.00  0.00           C  
ATOM   3776  CD1 LEU X 233     211.495 201.802 285.690  0.00  0.00           C  
ATOM   3777  CD2 LEU X 233     213.384 200.307 284.974  0.00  0.00           C  
ATOM   3778  H   LEU X 233     213.679 204.428 282.053  0.00  0.00           H  
ATOM   3779  HA  LEU X 233     211.970 204.420 284.341  0.00  0.00           H  
ATOM   3780  HB2 LEU X 233     212.085 202.340 283.270  0.00  0.00           H  
ATOM   3781  HB3 LEU X 233     213.852 202.431 283.337  0.00  0.00           H  
ATOM   3782  HG  LEU X 233     213.579 202.146 285.991  0.00  0.00           H  
ATOM   3783 HD11 LEU X 233     211.246 202.734 286.197  0.00  0.00           H  
ATOM   3784 HD12 LEU X 233     211.326 201.138 286.538  0.00  0.00           H  
ATOM   3785 HD13 LEU X 233     210.801 201.609 284.872  0.00  0.00           H  
ATOM   3786 HD21 LEU X 233     213.364 199.772 285.924  0.00  0.00           H  
ATOM   3787 HD22 LEU X 233     212.633 199.818 284.355  0.00  0.00           H  
ATOM   3788 HD23 LEU X 233     214.374 200.316 284.517  0.00  0.00           H  
ATOM   3789  N   LEU X 234     215.230 204.797 284.768  0.00  0.00           N  
ATOM   3790  CA  LEU X 234     216.170 205.311 285.690  0.00  0.00           C  
ATOM   3791  C   LEU X 234     215.812 206.747 286.188  0.00  0.00           C  
ATOM   3792  O   LEU X 234     215.974 207.002 287.389  0.00  0.00           O  
ATOM   3793  CB  LEU X 234     217.660 205.426 285.186  0.00  0.00           C  
ATOM   3794  CG  LEU X 234     218.242 204.097 284.538  0.00  0.00           C  
ATOM   3795  CD1 LEU X 234     219.682 204.375 284.157  0.00  0.00           C  
ATOM   3796  CD2 LEU X 234     218.131 202.899 285.406  0.00  0.00           C  
ATOM   3797  H   LEU X 234     215.617 204.553 283.868  0.00  0.00           H  
ATOM   3798  HA  LEU X 234     216.197 204.670 286.571  0.00  0.00           H  
ATOM   3799  HB2 LEU X 234     217.611 206.262 284.489  0.00  0.00           H  
ATOM   3800  HB3 LEU X 234     218.298 205.684 286.031  0.00  0.00           H  
ATOM   3801  HG  LEU X 234     217.764 203.990 283.564  0.00  0.00           H  
ATOM   3802 HD11 LEU X 234     220.494 204.126 284.841  0.00  0.00           H  
ATOM   3803 HD12 LEU X 234     219.789 205.430 283.907  0.00  0.00           H  
ATOM   3804 HD13 LEU X 234     219.872 203.951 283.171  0.00  0.00           H  
ATOM   3805 HD21 LEU X 234     218.799 202.172 284.944  0.00  0.00           H  
ATOM   3806 HD22 LEU X 234     218.457 203.146 286.417  0.00  0.00           H  
ATOM   3807 HD23 LEU X 234     217.108 202.549 285.267  0.00  0.00           H  
ATOM   3808  N   LYS X 235     215.305 207.724 285.375  0.00  0.00           N  
ATOM   3809  CA  LYS X 235     214.636 208.987 285.784  0.00  0.00           C  
ATOM   3810  C   LYS X 235     213.437 208.680 286.711  0.00  0.00           C  
ATOM   3811  O   LYS X 235     213.201 209.325 287.757  0.00  0.00           O  
ATOM   3812  CB  LYS X 235     214.456 209.715 284.464  0.00  0.00           C  
ATOM   3813  CG  LYS X 235     213.773 211.099 284.778  0.00  0.00           C  
ATOM   3814  CD  LYS X 235     213.688 211.926 283.494  0.00  0.00           C  
ATOM   3815  CE  LYS X 235     212.823 213.048 283.850  0.00  0.00           C  
ATOM   3816  NZ  LYS X 235     213.224 213.954 284.953  0.00  0.00           N1+
ATOM   3817  H   LYS X 235     215.199 207.589 284.379  0.00  0.00           H  
ATOM   3818  HA  LYS X 235     215.362 209.553 286.367  0.00  0.00           H  
ATOM   3819  HB2 LYS X 235     215.401 209.851 283.940  0.00  0.00           H  
ATOM   3820  HB3 LYS X 235     213.719 209.177 283.868  0.00  0.00           H  
ATOM   3821  HG2 LYS X 235     212.891 210.944 285.399  0.00  0.00           H  
ATOM   3822  HG3 LYS X 235     214.481 211.672 285.377  0.00  0.00           H  
ATOM   3823  HD2 LYS X 235     214.684 212.272 283.219  0.00  0.00           H  
ATOM   3824  HD3 LYS X 235     213.271 211.297 282.706  0.00  0.00           H  
ATOM   3825  HE2 LYS X 235     212.675 213.753 283.032  0.00  0.00           H  
ATOM   3826  HE3 LYS X 235     211.797 212.733 284.041  0.00  0.00           H  
ATOM   3827  HZ1 LYS X 235     213.167 213.499 285.852  0.00  0.00           H  
ATOM   3828  HZ2 LYS X 235     212.667 214.789 285.060  0.00  0.00           H  
ATOM   3829  HZ3 LYS X 235     214.146 214.348 284.835  0.00  0.00           H  
ATOM   3830  N   ASN X 236     212.484 207.862 286.267  0.00  0.00           N  
ATOM   3831  CA  ASN X 236     211.244 207.644 287.092  0.00  0.00           C  
ATOM   3832  C   ASN X 236     211.617 207.105 288.458  0.00  0.00           C  
ATOM   3833  O   ASN X 236     210.849 207.329 289.430  0.00  0.00           O  
ATOM   3834  CB  ASN X 236     210.272 206.749 286.335  0.00  0.00           C  
ATOM   3835  CG  ASN X 236     209.792 207.580 285.157  0.00  0.00           C  
ATOM   3836  ND2 ASN X 236     209.070 206.926 284.242  0.00  0.00           N  
ATOM   3837  OD1 ASN X 236     209.864 208.780 285.057  0.00  0.00           O  
ATOM   3838  H   ASN X 236     212.522 207.527 285.315  0.00  0.00           H  
ATOM   3839  HA  ASN X 236     210.742 208.582 287.325  0.00  0.00           H  
ATOM   3840  HB2 ASN X 236     210.894 205.921 285.996  0.00  0.00           H  
ATOM   3841  HB3 ASN X 236     209.497 206.371 287.001  0.00  0.00           H  
ATOM   3842 HD21 ASN X 236     208.823 205.967 284.441  0.00  0.00           H  
ATOM   3843 HD22 ASN X 236     208.441 207.466 283.667  0.00  0.00           H  
ATOM   3844  N   LEU X 237     212.715 206.406 288.592  0.00  0.00           N  
ATOM   3845  CA  LEU X 237     213.162 205.925 289.869  0.00  0.00           C  
ATOM   3846  C   LEU X 237     214.050 207.004 290.613  0.00  0.00           C  
ATOM   3847  O   LEU X 237     214.078 207.033 291.869  0.00  0.00           O  
ATOM   3848  CB  LEU X 237     214.031 204.667 289.654  0.00  0.00           C  
ATOM   3849  CG  LEU X 237     213.275 203.413 289.168  0.00  0.00           C  
ATOM   3850  CD1 LEU X 237     214.216 202.252 288.856  0.00  0.00           C  
ATOM   3851  CD2 LEU X 237     212.479 202.822 290.296  0.00  0.00           C  
ATOM   3852  H   LEU X 237     213.150 206.112 287.730  0.00  0.00           H  
ATOM   3853  HA  LEU X 237     212.342 205.595 290.507  0.00  0.00           H  
ATOM   3854  HB2 LEU X 237     214.921 204.887 289.063  0.00  0.00           H  
ATOM   3855  HB3 LEU X 237     214.291 204.386 290.675  0.00  0.00           H  
ATOM   3856  HG  LEU X 237     212.546 203.732 288.422  0.00  0.00           H  
ATOM   3857 HD11 LEU X 237     214.773 201.991 289.756  0.00  0.00           H  
ATOM   3858 HD12 LEU X 237     214.946 202.596 288.124  0.00  0.00           H  
ATOM   3859 HD13 LEU X 237     213.715 201.368 288.461  0.00  0.00           H  
ATOM   3860 HD21 LEU X 237     213.150 202.496 291.091  0.00  0.00           H  
ATOM   3861 HD22 LEU X 237     211.737 203.487 290.739  0.00  0.00           H  
ATOM   3862 HD23 LEU X 237     211.920 201.963 289.926  0.00  0.00           H  
ATOM   3863  N   ALA X 238     214.793 207.833 289.893  0.00  0.00           N  
ATOM   3864  CA  ALA X 238     215.576 208.915 290.545  0.00  0.00           C  
ATOM   3865  C   ALA X 238     214.685 209.876 291.345  0.00  0.00           C  
ATOM   3866  O   ALA X 238     215.046 210.243 292.463  0.00  0.00           O  
ATOM   3867  CB  ALA X 238     216.345 209.693 289.476  0.00  0.00           C  
ATOM   3868  H   ALA X 238     214.927 207.672 288.904  0.00  0.00           H  
ATOM   3869  HA  ALA X 238     216.285 208.447 291.229  0.00  0.00           H  
ATOM   3870  HB1 ALA X 238     216.823 210.619 289.797  0.00  0.00           H  
ATOM   3871  HB2 ALA X 238     215.545 209.999 288.801  0.00  0.00           H  
ATOM   3872  HB3 ALA X 238     217.069 208.978 289.085  0.00  0.00           H  
ATOM   3873  N   PHE X 239     213.450 210.207 290.783  0.00  0.00           N  
ATOM   3874  CA  PHE X 239     212.510 211.113 291.438  0.00  0.00           C  
ATOM   3875  C   PHE X 239     212.144 210.530 292.814  0.00  0.00           C  
ATOM   3876  O   PHE X 239     212.053 211.420 293.688  0.00  0.00           O  
ATOM   3877  CB  PHE X 239     211.248 211.304 290.497  0.00  0.00           C  
ATOM   3878  CG  PHE X 239     210.183 212.147 291.141  0.00  0.00           C  
ATOM   3879  CD1 PHE X 239     210.250 213.527 291.246  0.00  0.00           C  
ATOM   3880  CD2 PHE X 239     209.100 211.489 291.794  0.00  0.00           C  
ATOM   3881  CE1 PHE X 239     209.260 214.259 291.911  0.00  0.00           C  
ATOM   3882  CE2 PHE X 239     208.132 212.196 292.553  0.00  0.00           C  
ATOM   3883  CZ  PHE X 239     208.196 213.609 292.518  0.00  0.00           C  
ATOM   3884  H   PHE X 239     213.236 209.704 289.934  0.00  0.00           H  
ATOM   3885  HA  PHE X 239     213.000 212.062 291.651  0.00  0.00           H  
ATOM   3886  HB2 PHE X 239     211.603 211.903 289.659  0.00  0.00           H  
ATOM   3887  HB3 PHE X 239     210.883 210.366 290.077  0.00  0.00           H  
ATOM   3888  HD1 PHE X 239     211.105 213.968 290.755  0.00  0.00           H  
ATOM   3889  HD2 PHE X 239     208.952 210.420 291.746  0.00  0.00           H  
ATOM   3890  HE1 PHE X 239     209.195 215.337 291.878  0.00  0.00           H  
ATOM   3891  HE2 PHE X 239     207.255 211.746 292.994  0.00  0.00           H  
ATOM   3892  HZ  PHE X 239     207.408 214.196 292.966  0.00  0.00           H  
ATOM   3893  N   MET X 240     211.946 209.238 292.919  0.00  0.00           N  
ATOM   3894  CA  MET X 240     211.764 208.609 294.221  0.00  0.00           C  
ATOM   3895  C   MET X 240     213.017 208.409 295.078  0.00  0.00           C  
ATOM   3896  O   MET X 240     212.895 208.724 296.258  0.00  0.00           O  
ATOM   3897  CB  MET X 240     210.959 207.285 294.258  0.00  0.00           C  
ATOM   3898  CG  MET X 240     209.587 207.497 293.566  0.00  0.00           C  
ATOM   3899  SD  MET X 240     208.488 206.117 293.418  0.00  0.00           S  
ATOM   3900  CE  MET X 240     209.157 205.191 292.103  0.00  0.00           C  
ATOM   3901  H   MET X 240     211.910 208.672 292.083  0.00  0.00           H  
ATOM   3902  HA  MET X 240     211.076 209.312 294.690  0.00  0.00           H  
ATOM   3903  HB2 MET X 240     211.551 206.502 293.784  0.00  0.00           H  
ATOM   3904  HB3 MET X 240     210.741 207.028 295.295  0.00  0.00           H  
ATOM   3905  HG2 MET X 240     209.061 208.316 294.056  0.00  0.00           H  
ATOM   3906  HG3 MET X 240     209.802 207.891 292.572  0.00  0.00           H  
ATOM   3907  HE1 MET X 240     210.229 205.374 292.021  0.00  0.00           H  
ATOM   3908  HE2 MET X 240     208.848 204.154 292.233  0.00  0.00           H  
ATOM   3909  HE3 MET X 240     208.559 205.433 291.225  0.00  0.00           H  
ATOM   3910  N   GLU X 241     214.173 207.988 294.514  0.00  0.00           N  
ATOM   3911  CA  GLU X 241     215.399 207.841 295.376  0.00  0.00           C  
ATOM   3912  C   GLU X 241     215.834 209.163 296.136  0.00  0.00           C  
ATOM   3913  O   GLU X 241     215.946 209.318 297.356  0.00  0.00           O  
ATOM   3914  CB  GLU X 241     216.565 207.331 294.521  0.00  0.00           C  
ATOM   3915  CG  GLU X 241     217.864 206.962 295.297  0.00  0.00           C  
ATOM   3916  CD  GLU X 241     218.937 206.108 294.493  0.00  0.00           C  
ATOM   3917  OE1 GLU X 241     219.002 205.888 293.228  0.00  0.00           O  
ATOM   3918  OE2 GLU X 241     219.689 205.428 295.212  0.00  0.00           O1-
ATOM   3919  H   GLU X 241     214.213 207.681 293.553  0.00  0.00           H  
ATOM   3920  HA  GLU X 241     215.222 207.222 296.255  0.00  0.00           H  
ATOM   3921  HB2 GLU X 241     216.105 206.429 294.118  0.00  0.00           H  
ATOM   3922  HB3 GLU X 241     216.864 207.884 293.630  0.00  0.00           H  
ATOM   3923  HG2 GLU X 241     218.400 207.887 295.508  0.00  0.00           H  
ATOM   3924  HG3 GLU X 241     217.660 206.398 296.207  0.00  0.00           H  
ATOM   3925  N   SER X 242     215.921 210.192 295.328  0.00  0.00           N  
ATOM   3926  CA  SER X 242     216.110 211.560 295.844  0.00  0.00           C  
ATOM   3927  C   SER X 242     215.079 212.061 296.858  0.00  0.00           C  
ATOM   3928  O   SER X 242     215.512 212.871 297.708  0.00  0.00           O  
ATOM   3929  CB  SER X 242     216.197 212.587 294.679  0.00  0.00           C  
ATOM   3930  OG  SER X 242     215.065 212.661 293.821  0.00  0.00           O  
ATOM   3931  H   SER X 242     215.946 210.038 294.330  0.00  0.00           H  
ATOM   3932  HA  SER X 242     217.071 211.545 296.359  0.00  0.00           H  
ATOM   3933  HB2 SER X 242     216.308 213.563 295.150  0.00  0.00           H  
ATOM   3934  HB3 SER X 242     217.023 212.261 294.047  0.00  0.00           H  
ATOM   3935  HG  SER X 242     215.101 211.974 293.152  0.00  0.00           H  
ATOM   3936  N   ASP X 243     213.901 211.413 296.995  0.00  0.00           N  
ATOM   3937  CA  ASP X 243     212.959 211.865 298.010  0.00  0.00           C  
ATOM   3938  C   ASP X 243     213.102 210.879 299.235  0.00  0.00           C  
ATOM   3939  O   ASP X 243     213.097 211.284 300.396  0.00  0.00           O  
ATOM   3940  CB  ASP X 243     211.558 211.874 297.349  0.00  0.00           C  
ATOM   3941  CG  ASP X 243     210.462 212.573 298.241  0.00  0.00           C  
ATOM   3942  OD1 ASP X 243     209.221 212.255 298.074  0.00  0.00           O  
ATOM   3943  OD2 ASP X 243     210.844 213.356 299.123  0.00  0.00           O1-
ATOM   3944  H   ASP X 243     213.697 210.595 296.439  0.00  0.00           H  
ATOM   3945  HA  ASP X 243     213.325 212.807 298.417  0.00  0.00           H  
ATOM   3946  HB2 ASP X 243     211.625 212.599 296.538  0.00  0.00           H  
ATOM   3947  HB3 ASP X 243     211.296 210.881 296.985  0.00  0.00           H  
ATOM   3948  N   ILE X 244     213.293 209.613 298.945  0.00  0.00           N  
ATOM   3949  CA  ILE X 244     213.351 208.452 299.918  0.00  0.00           C  
ATOM   3950  C   ILE X 244     214.652 208.688 300.759  0.00  0.00           C  
ATOM   3951  O   ILE X 244     214.614 208.444 301.995  0.00  0.00           O  
ATOM   3952  CB  ILE X 244     213.326 207.031 299.269  0.00  0.00           C  
ATOM   3953  CG1 ILE X 244     211.830 206.720 298.825  0.00  0.00           C  
ATOM   3954  CG2 ILE X 244     213.630 205.906 300.370  0.00  0.00           C  
ATOM   3955  CD1 ILE X 244     211.698 205.619 297.808  0.00  0.00           C  
ATOM   3956  H   ILE X 244     213.358 209.376 297.965  0.00  0.00           H  
ATOM   3957  HA  ILE X 244     212.471 208.489 300.559  0.00  0.00           H  
ATOM   3958  HB  ILE X 244     214.016 206.965 298.428  0.00  0.00           H  
ATOM   3959 HG12 ILE X 244     211.292 206.585 299.764  0.00  0.00           H  
ATOM   3960 HG13 ILE X 244     211.394 207.588 298.331  0.00  0.00           H  
ATOM   3961 HG21 ILE X 244     214.594 206.154 300.815  0.00  0.00           H  
ATOM   3962 HG22 ILE X 244     213.791 204.927 299.918  0.00  0.00           H  
ATOM   3963 HG23 ILE X 244     212.873 205.917 301.155  0.00  0.00           H  
ATOM   3964 HD11 ILE X 244     210.633 205.389 297.804  0.00  0.00           H  
ATOM   3965 HD12 ILE X 244     212.227 204.717 298.117  0.00  0.00           H  
ATOM   3966 HD13 ILE X 244     212.095 205.935 296.842  0.00  0.00           H  
ATOM   3967  N   LEU X 245     215.795 209.097 300.138  0.00  0.00           N  
ATOM   3968  CA  LEU X 245     217.016 209.391 300.898  0.00  0.00           C  
ATOM   3969  C   LEU X 245     216.919 210.589 301.932  0.00  0.00           C  
ATOM   3970  O   LEU X 245     217.610 210.592 302.906  0.00  0.00           O  
ATOM   3971  CB  LEU X 245     218.148 209.624 299.871  0.00  0.00           C  
ATOM   3972  CG  LEU X 245     218.689 208.354 299.344  0.00  0.00           C  
ATOM   3973  CD1 LEU X 245     219.797 208.715 298.337  0.00  0.00           C  
ATOM   3974  CD2 LEU X 245     219.388 207.391 300.324  0.00  0.00           C  
ATOM   3975  H   LEU X 245     215.753 209.415 299.180  0.00  0.00           H  
ATOM   3976  HA  LEU X 245     217.257 208.517 301.502  0.00  0.00           H  
ATOM   3977  HB2 LEU X 245     217.848 210.222 299.010  0.00  0.00           H  
ATOM   3978  HB3 LEU X 245     218.887 210.192 300.436  0.00  0.00           H  
ATOM   3979  HG  LEU X 245     218.067 207.701 298.731  0.00  0.00           H  
ATOM   3980 HD11 LEU X 245     219.384 209.458 297.655  0.00  0.00           H  
ATOM   3981 HD12 LEU X 245     219.966 207.858 297.685  0.00  0.00           H  
ATOM   3982 HD13 LEU X 245     220.682 209.091 298.851  0.00  0.00           H  
ATOM   3983 HD21 LEU X 245     220.148 206.861 299.750  0.00  0.00           H  
ATOM   3984 HD22 LEU X 245     219.956 208.058 300.972  0.00  0.00           H  
ATOM   3985 HD23 LEU X 245     218.719 206.739 300.886  0.00  0.00           H  
ATOM   3986  N   GLU X 246     216.037 211.561 301.648  0.00  0.00           N  
ATOM   3987  CA  GLU X 246     215.804 212.704 302.581  0.00  0.00           C  
ATOM   3988  C   GLU X 246     215.041 212.200 303.844  0.00  0.00           C  
ATOM   3989  O   GLU X 246     215.568 212.537 304.930  0.00  0.00           O  
ATOM   3990  CB  GLU X 246     215.099 213.800 301.826  0.00  0.00           C  
ATOM   3991  CG  GLU X 246     215.922 214.650 300.829  0.00  0.00           C  
ATOM   3992  CD  GLU X 246     217.277 215.009 301.380  0.00  0.00           C  
ATOM   3993  OE1 GLU X 246     218.318 214.718 300.736  0.00  0.00           O  
ATOM   3994  OE2 GLU X 246     217.324 215.599 302.516  0.00  0.00           O1-
ATOM   3995  H   GLU X 246     215.747 211.597 300.681  0.00  0.00           H  
ATOM   3996  HA  GLU X 246     216.762 213.136 302.871  0.00  0.00           H  
ATOM   3997  HB2 GLU X 246     214.274 213.384 301.248  0.00  0.00           H  
ATOM   3998  HB3 GLU X 246     214.570 214.434 302.536  0.00  0.00           H  
ATOM   3999  HG2 GLU X 246     215.894 214.045 299.923  0.00  0.00           H  
ATOM   4000  HG3 GLU X 246     215.392 215.574 300.596  0.00  0.00           H  
ATOM   4001  N   LYS X 247     214.226 211.210 303.765  0.00  0.00           N  
ATOM   4002  CA  LYS X 247     213.757 210.551 304.979  0.00  0.00           C  
ATOM   4003  C   LYS X 247     214.924 209.890 305.756  0.00  0.00           C  
ATOM   4004  O   LYS X 247     214.882 209.967 306.971  0.00  0.00           O  
ATOM   4005  CB  LYS X 247     212.606 209.579 304.710  0.00  0.00           C  
ATOM   4006  CG  LYS X 247     211.360 210.378 304.436  0.00  0.00           C  
ATOM   4007  CD  LYS X 247     210.863 211.373 305.479  0.00  0.00           C  
ATOM   4008  CE  LYS X 247     209.464 211.896 305.042  0.00  0.00           C  
ATOM   4009  NZ  LYS X 247     208.780 212.730 306.040  0.00  0.00           N1+
ATOM   4010  H   LYS X 247     213.969 210.775 302.891  0.00  0.00           H  
ATOM   4011  HA  LYS X 247     213.447 211.316 305.690  0.00  0.00           H  
ATOM   4012  HB2 LYS X 247     212.887 208.914 303.893  0.00  0.00           H  
ATOM   4013  HB3 LYS X 247     212.358 209.038 305.623  0.00  0.00           H  
ATOM   4014  HG2 LYS X 247     211.531 210.939 303.518  0.00  0.00           H  
ATOM   4015  HG3 LYS X 247     210.554 209.647 304.368  0.00  0.00           H  
ATOM   4016  HD2 LYS X 247     210.774 211.024 306.508  0.00  0.00           H  
ATOM   4017  HD3 LYS X 247     211.508 212.251 305.528  0.00  0.00           H  
ATOM   4018  HE2 LYS X 247     209.443 212.376 304.063  0.00  0.00           H  
ATOM   4019  HE3 LYS X 247     208.799 211.052 304.857  0.00  0.00           H  
ATOM   4020  HZ1 LYS X 247     208.390 212.160 306.778  0.00  0.00           H  
ATOM   4021  HZ2 LYS X 247     208.055 213.353 305.714  0.00  0.00           H  
ATOM   4022  HZ3 LYS X 247     209.493 213.246 306.535  0.00  0.00           H  
ATOM   4023  N   VAL X 248     215.847 209.188 305.093  0.00  0.00           N  
ATOM   4024  CA  VAL X 248     216.894 208.398 305.776  0.00  0.00           C  
ATOM   4025  C   VAL X 248     217.867 209.397 306.466  0.00  0.00           C  
ATOM   4026  O   VAL X 248     218.354 208.899 307.492  0.00  0.00           O  
ATOM   4027  CB  VAL X 248     217.549 207.561 304.719  0.00  0.00           C  
ATOM   4028  CG1 VAL X 248     218.848 206.872 305.105  0.00  0.00           C  
ATOM   4029  CG2 VAL X 248     216.596 206.471 304.104  0.00  0.00           C  
ATOM   4030  H   VAL X 248     215.776 209.208 304.085  0.00  0.00           H  
ATOM   4031  HA  VAL X 248     216.361 207.824 306.534  0.00  0.00           H  
ATOM   4032  HB  VAL X 248     217.868 208.216 303.908  0.00  0.00           H  
ATOM   4033 HG11 VAL X 248     219.452 207.559 305.697  0.00  0.00           H  
ATOM   4034 HG12 VAL X 248     218.691 205.958 305.677  0.00  0.00           H  
ATOM   4035 HG13 VAL X 248     219.237 206.519 304.150  0.00  0.00           H  
ATOM   4036 HG21 VAL X 248     215.978 205.960 304.843  0.00  0.00           H  
ATOM   4037 HG22 VAL X 248     217.213 205.716 303.616  0.00  0.00           H  
ATOM   4038 HG23 VAL X 248     215.950 206.954 303.371  0.00  0.00           H  
ATOM   4039  N   LYS X 249     218.057 210.605 306.055  0.00  0.00           N  
ATOM   4040  CA  LYS X 249     218.827 211.714 306.689  0.00  0.00           C  
ATOM   4041  C   LYS X 249     218.132 212.279 307.945  0.00  0.00           C  
ATOM   4042  O   LYS X 249     218.773 212.646 308.958  0.00  0.00           O  
ATOM   4043  CB  LYS X 249     219.128 212.711 305.600  0.00  0.00           C  
ATOM   4044  CG  LYS X 249     220.091 212.050 304.654  0.00  0.00           C  
ATOM   4045  CD  LYS X 249     220.088 212.832 303.322  0.00  0.00           C  
ATOM   4046  CE  LYS X 249     220.913 214.096 303.458  0.00  0.00           C  
ATOM   4047  NZ  LYS X 249     220.756 214.916 302.230  0.00  0.00           N1+
ATOM   4048  H   LYS X 249     217.595 210.797 305.177  0.00  0.00           H  
ATOM   4049  HA  LYS X 249     219.754 211.229 306.996  0.00  0.00           H  
ATOM   4050  HB2 LYS X 249     218.210 213.013 305.097  0.00  0.00           H  
ATOM   4051  HB3 LYS X 249     219.604 213.560 306.089  0.00  0.00           H  
ATOM   4052  HG2 LYS X 249     221.087 212.084 305.095  0.00  0.00           H  
ATOM   4053  HG3 LYS X 249     219.767 211.066 304.316  0.00  0.00           H  
ATOM   4054  HD2 LYS X 249     220.460 212.270 302.465  0.00  0.00           H  
ATOM   4055  HD3 LYS X 249     219.052 213.085 303.100  0.00  0.00           H  
ATOM   4056  HE2 LYS X 249     220.506 214.709 304.262  0.00  0.00           H  
ATOM   4057  HE3 LYS X 249     221.969 213.878 303.615  0.00  0.00           H  
ATOM   4058  HZ1 LYS X 249     219.795 215.060 301.955  0.00  0.00           H  
ATOM   4059  HZ2 LYS X 249     221.322 214.554 301.475  0.00  0.00           H  
ATOM   4060  HZ3 LYS X 249     221.203 215.817 302.325  0.00  0.00           H  
ATOM   4061  N   GLU X 250     216.806 212.270 307.955  0.00  0.00           N  
ATOM   4062  CA  GLU X 250     215.940 212.830 309.049  0.00  0.00           C  
ATOM   4063  C   GLU X 250     215.720 211.717 310.099  0.00  0.00           C  
ATOM   4064  O   GLU X 250     215.746 212.007 311.266  0.00  0.00           O  
ATOM   4065  CB  GLU X 250     214.690 213.325 308.330  0.00  0.00           C  
ATOM   4066  CG  GLU X 250     213.588 213.595 309.257  0.00  0.00           C  
ATOM   4067  CD  GLU X 250     213.946 214.744 310.285  0.00  0.00           C  
ATOM   4068  OE1 GLU X 250     213.668 214.663 311.490  0.00  0.00           O  
ATOM   4069  OE2 GLU X 250     214.486 215.788 309.819  0.00  0.00           O1-
ATOM   4070  H   GLU X 250     216.302 211.903 307.160  0.00  0.00           H  
ATOM   4071  HA  GLU X 250     216.494 213.633 309.537  0.00  0.00           H  
ATOM   4072  HB2 GLU X 250     214.949 214.194 307.725  0.00  0.00           H  
ATOM   4073  HB3 GLU X 250     214.303 212.557 307.661  0.00  0.00           H  
ATOM   4074  HG2 GLU X 250     212.783 214.000 308.644  0.00  0.00           H  
ATOM   4075  HG3 GLU X 250     213.213 212.670 309.695  0.00  0.00           H  
ATOM   4076  N   HIE X 251     215.586 210.467 309.654  0.00  0.00           N  
ATOM   4077  CA  HIE X 251     215.558 209.383 310.610  0.00  0.00           C  
ATOM   4078  C   HIE X 251     217.023 208.965 311.027  0.00  0.00           C  
ATOM   4079  O   HIE X 251     217.189 208.363 312.099  0.00  0.00           O  
ATOM   4080  CB  HIE X 251     214.763 208.273 310.000  0.00  0.00           C  
ATOM   4081  CG  HIE X 251     213.307 208.566 309.645  0.00  0.00           C  
ATOM   4082  CD2 HIE X 251     212.611 207.825 308.725  0.00  0.00           C  
ATOM   4083  ND1 HIE X 251     212.410 209.429 310.335  0.00  0.00           N  
ATOM   4084  CE1 HIE X 251     211.172 209.210 309.817  0.00  0.00           C  
ATOM   4085  NE2 HIE X 251     211.267 208.224 308.840  0.00  0.00           N  
ATOM   4086  H   HIE X 251     215.499 210.196 308.685  0.00  0.00           H  
ATOM   4087  HA  HIE X 251     215.002 209.704 311.491  0.00  0.00           H  
ATOM   4088  HB2 HIE X 251     215.217 208.036 309.037  0.00  0.00           H  
ATOM   4089  HB3 HIE X 251     214.869 207.319 310.516  0.00  0.00           H  
ATOM   4090  HD2 HIE X 251     213.040 207.166 307.985  0.00  0.00           H  
ATOM   4091  HE1 HIE X 251     210.234 209.674 310.084  0.00  0.00           H  
ATOM   4092  HE2 HIE X 251     210.524 207.850 308.267  0.00  0.00           H  
ATOM   4093  N   GLN X 252     218.060 209.367 310.293  0.00  0.00           N  
ATOM   4094  CA  GLN X 252     219.400 209.444 310.744  0.00  0.00           C  
ATOM   4095  C   GLN X 252     219.613 210.413 311.871  0.00  0.00           C  
ATOM   4096  O   GLN X 252     220.341 210.134 312.853  0.00  0.00           O  
ATOM   4097  CB  GLN X 252     220.519 209.573 309.661  0.00  0.00           C  
ATOM   4098  CG  GLN X 252     221.881 210.083 310.098  0.00  0.00           C  
ATOM   4099  CD  GLN X 252     222.904 209.731 308.984  0.00  0.00           C  
ATOM   4100  NE2 GLN X 252     223.223 210.641 308.140  0.00  0.00           N  
ATOM   4101  OE1 GLN X 252     223.474 208.637 308.944  0.00  0.00           O  
ATOM   4102  H   GLN X 252     217.776 209.647 309.365  0.00  0.00           H  
ATOM   4103  HA  GLN X 252     219.576 208.447 311.146  0.00  0.00           H  
ATOM   4104  HB2 GLN X 252     220.714 208.647 309.119  0.00  0.00           H  
ATOM   4105  HB3 GLN X 252     220.203 210.289 308.902  0.00  0.00           H  
ATOM   4106  HG2 GLN X 252     221.870 211.137 310.375  0.00  0.00           H  
ATOM   4107  HG3 GLN X 252     222.138 209.560 311.019  0.00  0.00           H  
ATOM   4108 HE21 GLN X 252     223.867 210.462 307.383  0.00  0.00           H  
ATOM   4109 HE22 GLN X 252     222.867 211.580 308.243  0.00  0.00           H  
ATOM   4110  N   GLU X 253     219.095 211.594 311.778  0.00  0.00           N  
ATOM   4111  CA  GLU X 253     219.300 212.804 312.589  0.00  0.00           C  
ATOM   4112  C   GLU X 253     218.744 212.724 313.987  0.00  0.00           C  
ATOM   4113  O   GLU X 253     219.214 213.534 314.845  0.00  0.00           O  
ATOM   4114  CB  GLU X 253     218.787 213.995 311.804  0.00  0.00           C  
ATOM   4115  CG  GLU X 253     218.914 215.400 312.347  0.00  0.00           C  
ATOM   4116  CD  GLU X 253     217.918 215.895 313.455  0.00  0.00           C  
ATOM   4117  OE1 GLU X 253     218.380 216.537 314.390  0.00  0.00           O  
ATOM   4118  OE2 GLU X 253     216.674 215.882 313.288  0.00  0.00           O1-
ATOM   4119  H   GLU X 253     218.730 211.801 310.859  0.00  0.00           H  
ATOM   4120  HA  GLU X 253     220.374 212.903 312.750  0.00  0.00           H  
ATOM   4121  HB2 GLU X 253     219.306 213.996 310.845  0.00  0.00           H  
ATOM   4122  HB3 GLU X 253     217.722 213.943 311.575  0.00  0.00           H  
ATOM   4123  HG2 GLU X 253     219.934 215.699 312.588  0.00  0.00           H  
ATOM   4124  HG3 GLU X 253     218.706 215.981 311.449  0.00  0.00           H  
ATOM   4125  N   SER X 254     217.749 211.826 314.261  0.00  0.00           N  
ATOM   4126  CA  SER X 254     217.502 211.186 315.587  0.00  0.00           C  
ATOM   4127  C   SER X 254     216.780 209.826 315.421  0.00  0.00           C  
ATOM   4128  O   SER X 254     216.072 209.598 314.458  0.00  0.00           O  
ATOM   4129  CB  SER X 254     216.665 212.109 316.382  0.00  0.00           C  
ATOM   4130  OG  SER X 254     215.324 212.236 315.988  0.00  0.00           O  
ATOM   4131  H   SER X 254     217.413 211.311 313.460  0.00  0.00           H  
ATOM   4132  HA  SER X 254     218.474 211.024 316.055  0.00  0.00           H  
ATOM   4133  HB2 SER X 254     216.667 211.742 317.408  0.00  0.00           H  
ATOM   4134  HB3 SER X 254     217.066 213.122 316.380  0.00  0.00           H  
ATOM   4135  HG  SER X 254     215.159 212.563 315.100  0.00  0.00           H  
ATOM   4136  N   MET X 255     216.829 208.926 316.445  0.00  0.00           N  
ATOM   4137  CA  MET X 255     216.014 207.708 316.578  0.00  0.00           C  
ATOM   4138  C   MET X 255     215.459 207.434 317.937  0.00  0.00           C  
ATOM   4139  O   MET X 255     216.249 207.425 318.914  0.00  0.00           O  
ATOM   4140  CB  MET X 255     216.716 206.431 316.021  0.00  0.00           C  
ATOM   4141  CG  MET X 255     216.060 205.009 316.185  0.00  0.00           C  
ATOM   4142  SD  MET X 255     216.787 203.705 315.136  0.00  0.00           S  
ATOM   4143  CE  MET X 255     218.361 203.719 315.862  0.00  0.00           C  
ATOM   4144  H   MET X 255     217.418 209.169 317.228  0.00  0.00           H  
ATOM   4145  HA  MET X 255     215.135 207.873 315.955  0.00  0.00           H  
ATOM   4146  HB2 MET X 255     216.919 206.603 314.964  0.00  0.00           H  
ATOM   4147  HB3 MET X 255     217.691 206.456 316.507  0.00  0.00           H  
ATOM   4148  HG2 MET X 255     216.081 204.672 317.221  0.00  0.00           H  
ATOM   4149  HG3 MET X 255     215.007 205.081 315.913  0.00  0.00           H  
ATOM   4150  HE1 MET X 255     219.016 203.088 315.261  0.00  0.00           H  
ATOM   4151  HE2 MET X 255     218.780 204.721 315.951  0.00  0.00           H  
ATOM   4152  HE3 MET X 255     218.292 203.393 316.900  0.00  0.00           H  
ATOM   4153  N   ASP X 256     214.211 206.959 318.001  0.00  0.00           N  
ATOM   4154  CA  ASP X 256     213.785 206.099 319.184  0.00  0.00           C  
ATOM   4155  C   ASP X 256     213.565 204.704 318.635  0.00  0.00           C  
ATOM   4156  O   ASP X 256     212.696 204.420 317.823  0.00  0.00           O  
ATOM   4157  CB  ASP X 256     212.506 206.627 319.930  0.00  0.00           C  
ATOM   4158  CG  ASP X 256     211.971 205.540 320.948  0.00  0.00           C  
ATOM   4159  OD1 ASP X 256     210.779 205.644 321.268  0.00  0.00           O  
ATOM   4160  OD2 ASP X 256     212.745 204.640 321.336  0.00  0.00           O1-
ATOM   4161  H   ASP X 256     213.685 206.925 317.140  0.00  0.00           H  
ATOM   4162  HA  ASP X 256     214.582 206.139 319.926  0.00  0.00           H  
ATOM   4163  HB2 ASP X 256     212.833 207.512 320.476  0.00  0.00           H  
ATOM   4164  HB3 ASP X 256     211.779 206.928 319.175  0.00  0.00           H  
ATOM   4165  N   ILE X 257     214.462 203.776 319.008  0.00  0.00           N  
ATOM   4166  CA  ILE X 257     214.632 202.457 318.306  0.00  0.00           C  
ATOM   4167  C   ILE X 257     213.363 201.586 318.565  0.00  0.00           C  
ATOM   4168  O   ILE X 257     213.155 200.625 317.870  0.00  0.00           O  
ATOM   4169  CB  ILE X 257     216.001 201.808 318.538  0.00  0.00           C  
ATOM   4170  CG1 ILE X 257     216.340 200.632 317.612  0.00  0.00           C  
ATOM   4171  CG2 ILE X 257     216.197 201.339 319.975  0.00  0.00           C  
ATOM   4172  CD1 ILE X 257     217.662 200.037 317.751  0.00  0.00           C  
ATOM   4173  H   ILE X 257     215.188 204.025 319.665  0.00  0.00           H  
ATOM   4174  HA  ILE X 257     214.639 202.658 317.235  0.00  0.00           H  
ATOM   4175  HB  ILE X 257     216.761 202.578 318.405  0.00  0.00           H  
ATOM   4176 HG12 ILE X 257     215.548 199.884 317.592  0.00  0.00           H  
ATOM   4177 HG13 ILE X 257     216.334 201.024 316.595  0.00  0.00           H  
ATOM   4178 HG21 ILE X 257     215.708 200.374 320.106  0.00  0.00           H  
ATOM   4179 HG22 ILE X 257     215.871 202.042 320.741  0.00  0.00           H  
ATOM   4180 HG23 ILE X 257     217.246 201.132 320.186  0.00  0.00           H  
ATOM   4181 HD11 ILE X 257     217.753 199.424 318.648  0.00  0.00           H  
ATOM   4182 HD12 ILE X 257     218.444 200.795 317.717  0.00  0.00           H  
ATOM   4183 HD13 ILE X 257     217.849 199.374 316.906  0.00  0.00           H  
ATOM   4184  N   ASN X 258     212.675 201.922 319.627  0.00  0.00           N  
ATOM   4185  CA  ASN X 258     211.461 201.300 320.064  0.00  0.00           C  
ATOM   4186  C   ASN X 258     210.161 201.658 319.312  0.00  0.00           C  
ATOM   4187  O   ASN X 258     209.219 200.940 319.546  0.00  0.00           O  
ATOM   4188  CB  ASN X 258     211.355 201.489 321.601  0.00  0.00           C  
ATOM   4189  CG  ASN X 258     212.632 201.208 322.248  0.00  0.00           C  
ATOM   4190  ND2 ASN X 258     213.374 202.263 322.601  0.00  0.00           N  
ATOM   4191  OD1 ASN X 258     212.991 200.029 322.290  0.00  0.00           O  
ATOM   4192  H   ASN X 258     213.035 202.745 320.087  0.00  0.00           H  
ATOM   4193  HA  ASN X 258     211.622 200.224 319.994  0.00  0.00           H  
ATOM   4194  HB2 ASN X 258     211.112 202.519 321.858  0.00  0.00           H  
ATOM   4195  HB3 ASN X 258     210.573 200.833 321.983  0.00  0.00           H  
ATOM   4196 HD21 ASN X 258     213.115 203.220 322.406  0.00  0.00           H  
ATOM   4197 HD22 ASN X 258     214.327 202.084 322.884  0.00  0.00           H  
ATOM   4198  N   ASN X 259     210.040 202.719 318.503  0.00  0.00           N  
ATOM   4199  CA  ASN X 259     208.745 203.243 317.969  0.00  0.00           C  
ATOM   4200  C   ASN X 259     208.909 203.796 316.530  0.00  0.00           C  
ATOM   4201  O   ASN X 259     208.942 204.999 316.261  0.00  0.00           O  
ATOM   4202  CB  ASN X 259     208.062 204.366 318.910  0.00  0.00           C  
ATOM   4203  CG  ASN X 259     207.708 203.730 320.211  0.00  0.00           C  
ATOM   4204  ND2 ASN X 259     208.557 203.843 321.224  0.00  0.00           N  
ATOM   4205  OD1 ASN X 259     206.603 203.186 320.299  0.00  0.00           O  
ATOM   4206  H   ASN X 259     210.886 203.249 318.353  0.00  0.00           H  
ATOM   4207  HA  ASN X 259     207.966 202.490 317.853  0.00  0.00           H  
ATOM   4208  HB2 ASN X 259     208.702 205.236 319.057  0.00  0.00           H  
ATOM   4209  HB3 ASN X 259     207.195 204.822 318.432  0.00  0.00           H  
ATOM   4210 HD21 ASN X 259     209.351 204.464 321.160  0.00  0.00           H  
ATOM   4211 HD22 ASN X 259     208.512 203.402 322.132  0.00  0.00           H  
ATOM   4212  N   PRO X 260     208.800 202.898 315.488  0.00  0.00           N  
ATOM   4213  CA  PRO X 260     208.958 203.273 314.052  0.00  0.00           C  
ATOM   4214  C   PRO X 260     207.961 204.392 313.629  0.00  0.00           C  
ATOM   4215  O   PRO X 260     206.747 204.360 313.851  0.00  0.00           O  
ATOM   4216  CB  PRO X 260     208.502 202.045 313.348  0.00  0.00           C  
ATOM   4217  CG  PRO X 260     208.957 200.917 314.313  0.00  0.00           C  
ATOM   4218  CD  PRO X 260     208.582 201.504 315.671  0.00  0.00           C  
ATOM   4219  HA  PRO X 260     209.968 203.546 313.749  0.00  0.00           H  
ATOM   4220  HB2 PRO X 260     207.413 201.997 313.332  0.00  0.00           H  
ATOM   4221  HB3 PRO X 260     208.928 202.014 312.345  0.00  0.00           H  
ATOM   4222  HG2 PRO X 260     208.468 199.964 314.115  0.00  0.00           H  
ATOM   4223  HG3 PRO X 260     210.047 200.909 314.294  0.00  0.00           H  
ATOM   4224  HD2 PRO X 260     207.536 201.253 315.847  0.00  0.00           H  
ATOM   4225  HD3 PRO X 260     209.196 201.037 316.441  0.00  0.00           H  
ATOM   4226  N   ARG X 261     208.471 205.474 313.076  0.00  0.00           N  
ATOM   4227  CA  ARG X 261     207.770 206.576 312.498  0.00  0.00           C  
ATOM   4228  C   ARG X 261     207.014 206.226 311.256  0.00  0.00           C  
ATOM   4229  O   ARG X 261     205.847 206.691 311.102  0.00  0.00           O  
ATOM   4230  CB  ARG X 261     208.855 207.668 312.259  0.00  0.00           C  
ATOM   4231  CG  ARG X 261     209.211 208.279 313.579  0.00  0.00           C  
ATOM   4232  CD  ARG X 261     210.473 209.174 313.529  0.00  0.00           C  
ATOM   4233  NE  ARG X 261     211.763 208.395 313.460  0.00  0.00           N  
ATOM   4234  CZ  ARG X 261     212.999 208.856 313.697  0.00  0.00           C  
ATOM   4235  NH1 ARG X 261     213.326 210.113 313.910  0.00  0.00           N1+
ATOM   4236  NH2 ARG X 261     213.901 207.954 313.624  0.00  0.00           N  
ATOM   4237  H   ARG X 261     209.477 205.427 312.990  0.00  0.00           H  
ATOM   4238  HA  ARG X 261     207.067 206.877 313.274  0.00  0.00           H  
ATOM   4239  HB2 ARG X 261     209.719 207.181 311.806  0.00  0.00           H  
ATOM   4240  HB3 ARG X 261     208.292 208.403 311.683  0.00  0.00           H  
ATOM   4241  HG2 ARG X 261     208.446 208.987 313.898  0.00  0.00           H  
ATOM   4242  HG3 ARG X 261     209.199 207.530 314.371  0.00  0.00           H  
ATOM   4243  HD2 ARG X 261     210.520 209.910 312.727  0.00  0.00           H  
ATOM   4244  HD3 ARG X 261     210.528 209.666 314.500  0.00  0.00           H  
ATOM   4245  HE  ARG X 261     211.662 207.393 313.537  0.00  0.00           H  
ATOM   4246 HH11 ARG X 261     212.565 210.772 314.001  0.00  0.00           H  
ATOM   4247 HH12 ARG X 261     214.305 210.285 314.085  0.00  0.00           H  
ATOM   4248 HH21 ARG X 261     213.822 207.007 313.282  0.00  0.00           H  
ATOM   4249 HH22 ARG X 261     214.861 208.210 313.806  0.00  0.00           H  
ATOM   4250  N   ASP X 262     207.660 205.479 310.341  0.00  0.00           N  
ATOM   4251  CA  ASP X 262     207.104 205.001 309.076  0.00  0.00           C  
ATOM   4252  C   ASP X 262     207.815 203.687 308.609  0.00  0.00           C  
ATOM   4253  O   ASP X 262     208.524 202.996 309.316  0.00  0.00           O  
ATOM   4254  CB  ASP X 262     207.138 206.218 308.097  0.00  0.00           C  
ATOM   4255  CG  ASP X 262     208.578 206.821 307.955  0.00  0.00           C  
ATOM   4256  OD1 ASP X 262     209.584 206.081 307.835  0.00  0.00           O  
ATOM   4257  OD2 ASP X 262     208.627 208.038 307.904  0.00  0.00           O1-
ATOM   4258  H   ASP X 262     208.650 205.420 310.534  0.00  0.00           H  
ATOM   4259  HA  ASP X 262     206.052 204.724 309.137  0.00  0.00           H  
ATOM   4260  HB2 ASP X 262     206.928 205.759 307.131  0.00  0.00           H  
ATOM   4261  HB3 ASP X 262     206.400 206.924 308.478  0.00  0.00           H  
ATOM   4262  N   PHE X 263     207.612 203.268 307.358  0.00  0.00           N  
ATOM   4263  CA  PHE X 263     208.287 202.137 306.719  0.00  0.00           C  
ATOM   4264  C   PHE X 263     209.816 202.465 306.460  0.00  0.00           C  
ATOM   4265  O   PHE X 263     210.627 201.522 306.675  0.00  0.00           O  
ATOM   4266  CB  PHE X 263     207.521 201.748 305.410  0.00  0.00           C  
ATOM   4267  CG  PHE X 263     207.987 200.499 304.622  0.00  0.00           C  
ATOM   4268  CD1 PHE X 263     209.236 200.478 303.913  0.00  0.00           C  
ATOM   4269  CD2 PHE X 263     207.105 199.418 304.476  0.00  0.00           C  
ATOM   4270  CE1 PHE X 263     209.556 199.312 303.244  0.00  0.00           C  
ATOM   4271  CE2 PHE X 263     207.434 198.243 303.740  0.00  0.00           C  
ATOM   4272  CZ  PHE X 263     208.709 198.245 303.090  0.00  0.00           C  
ATOM   4273  H   PHE X 263     207.125 203.920 306.759  0.00  0.00           H  
ATOM   4274  HA  PHE X 263     208.203 201.264 307.367  0.00  0.00           H  
ATOM   4275  HB2 PHE X 263     206.461 201.701 305.659  0.00  0.00           H  
ATOM   4276  HB3 PHE X 263     207.498 202.620 304.757  0.00  0.00           H  
ATOM   4277  HD1 PHE X 263     209.871 201.351 303.892  0.00  0.00           H  
ATOM   4278  HD2 PHE X 263     206.140 199.486 304.956  0.00  0.00           H  
ATOM   4279  HE1 PHE X 263     210.586 199.204 302.937  0.00  0.00           H  
ATOM   4280  HE2 PHE X 263     206.741 197.414 303.725  0.00  0.00           H  
ATOM   4281  HZ  PHE X 263     209.021 197.310 302.649  0.00  0.00           H  
ATOM   4282  N   ILE X 264     210.172 203.709 306.083  0.00  0.00           N  
ATOM   4283  CA  ILE X 264     211.613 204.064 306.094  0.00  0.00           C  
ATOM   4284  C   ILE X 264     212.407 203.796 307.397  0.00  0.00           C  
ATOM   4285  O   ILE X 264     213.405 203.124 307.465  0.00  0.00           O  
ATOM   4286  CB  ILE X 264     211.776 205.482 305.533  0.00  0.00           C  
ATOM   4287  CG1 ILE X 264     211.026 205.478 304.120  0.00  0.00           C  
ATOM   4288  CG2 ILE X 264     213.246 205.770 305.377  0.00  0.00           C  
ATOM   4289  CD1 ILE X 264     211.248 206.808 303.333  0.00  0.00           C  
ATOM   4290  H   ILE X 264     209.402 204.357 305.996  0.00  0.00           H  
ATOM   4291  HA  ILE X 264     212.091 203.422 305.355  0.00  0.00           H  
ATOM   4292  HB  ILE X 264     211.348 206.264 306.159  0.00  0.00           H  
ATOM   4293 HG12 ILE X 264     211.279 204.703 303.396  0.00  0.00           H  
ATOM   4294 HG13 ILE X 264     209.943 205.481 304.244  0.00  0.00           H  
ATOM   4295 HG21 ILE X 264     213.657 205.740 306.386  0.00  0.00           H  
ATOM   4296 HG22 ILE X 264     213.399 206.814 305.104  0.00  0.00           H  
ATOM   4297 HG23 ILE X 264     213.799 205.130 304.690  0.00  0.00           H  
ATOM   4298 HD11 ILE X 264     210.578 206.845 302.475  0.00  0.00           H  
ATOM   4299 HD12 ILE X 264     212.313 206.886 303.111  0.00  0.00           H  
ATOM   4300 HD13 ILE X 264     210.941 207.629 303.982  0.00  0.00           H  
ATOM   4301  N   ASP X 265     211.875 204.384 308.506  0.00  0.00           N  
ATOM   4302  CA  ASP X 265     212.332 204.203 309.910  0.00  0.00           C  
ATOM   4303  C   ASP X 265     212.321 202.762 310.322  0.00  0.00           C  
ATOM   4304  O   ASP X 265     213.223 202.251 311.042  0.00  0.00           O  
ATOM   4305  CB  ASP X 265     211.386 205.032 310.855  0.00  0.00           C  
ATOM   4306  CG  ASP X 265     212.106 205.431 312.135  0.00  0.00           C  
ATOM   4307  OD1 ASP X 265     213.322 205.663 312.233  0.00  0.00           O  
ATOM   4308  OD2 ASP X 265     211.330 205.621 313.095  0.00  0.00           O1-
ATOM   4309  H   ASP X 265     211.078 204.999 308.422  0.00  0.00           H  
ATOM   4310  HA  ASP X 265     213.366 204.538 309.994  0.00  0.00           H  
ATOM   4311  HB2 ASP X 265     211.137 205.962 310.345  0.00  0.00           H  
ATOM   4312  HB3 ASP X 265     210.509 204.418 311.058  0.00  0.00           H  
ATOM   4313  N   CYS X 266     211.312 201.948 309.921  0.00  0.00           N  
ATOM   4314  CA  CYS X 266     211.087 200.647 310.418  0.00  0.00           C  
ATOM   4315  C   CYS X 266     212.287 199.812 309.812  0.00  0.00           C  
ATOM   4316  O   CYS X 266     212.766 198.911 310.532  0.00  0.00           O  
ATOM   4317  CB  CYS X 266     209.673 200.095 310.008  0.00  0.00           C  
ATOM   4318  SG  CYS X 266     209.323 198.522 310.815  0.00  0.00           S  
ATOM   4319  H   CYS X 266     210.624 202.338 309.293  0.00  0.00           H  
ATOM   4320  HA  CYS X 266     211.269 200.574 311.490  0.00  0.00           H  
ATOM   4321  HB2 CYS X 266     208.868 200.766 310.309  0.00  0.00           H  
ATOM   4322  HB3 CYS X 266     209.555 199.865 308.949  0.00  0.00           H  
ATOM   4323  HG  CYS X 266     209.017 197.762 309.760  0.00  0.00           H  
ATOM   4324  N   PHE X 267     212.643 200.083 308.548  0.00  0.00           N  
ATOM   4325  CA  PHE X 267     213.688 199.470 307.859  0.00  0.00           C  
ATOM   4326  C   PHE X 267     215.072 199.876 308.402  0.00  0.00           C  
ATOM   4327  O   PHE X 267     215.887 198.999 308.611  0.00  0.00           O  
ATOM   4328  CB  PHE X 267     213.632 199.828 306.328  0.00  0.00           C  
ATOM   4329  CG  PHE X 267     214.612 198.921 305.548  0.00  0.00           C  
ATOM   4330  CD1 PHE X 267     214.163 197.943 304.623  0.00  0.00           C  
ATOM   4331  CD2 PHE X 267     215.997 199.173 305.509  0.00  0.00           C  
ATOM   4332  CE1 PHE X 267     215.066 197.244 303.799  0.00  0.00           C  
ATOM   4333  CE2 PHE X 267     216.938 198.483 304.671  0.00  0.00           C  
ATOM   4334  CZ  PHE X 267     216.460 197.531 303.765  0.00  0.00           C  
ATOM   4335  H   PHE X 267     212.224 200.857 308.052  0.00  0.00           H  
ATOM   4336  HA  PHE X 267     213.593 198.384 307.855  0.00  0.00           H  
ATOM   4337  HB2 PHE X 267     212.597 199.738 305.998  0.00  0.00           H  
ATOM   4338  HB3 PHE X 267     213.965 200.863 306.243  0.00  0.00           H  
ATOM   4339  HD1 PHE X 267     213.110 197.701 304.628  0.00  0.00           H  
ATOM   4340  HD2 PHE X 267     216.366 199.922 306.194  0.00  0.00           H  
ATOM   4341  HE1 PHE X 267     214.699 196.548 303.060  0.00  0.00           H  
ATOM   4342  HE2 PHE X 267     217.979 198.742 304.541  0.00  0.00           H  
ATOM   4343  HZ  PHE X 267     217.212 197.108 303.116  0.00  0.00           H  
ATOM   4344  N   LEU X 268     215.337 201.106 308.720  0.00  0.00           N  
ATOM   4345  CA  LEU X 268     216.486 201.525 309.489  0.00  0.00           C  
ATOM   4346  C   LEU X 268     216.577 200.838 310.827  0.00  0.00           C  
ATOM   4347  O   LEU X 268     217.682 200.363 311.185  0.00  0.00           O  
ATOM   4348  CB  LEU X 268     216.530 203.069 309.605  0.00  0.00           C  
ATOM   4349  CG  LEU X 268     216.709 203.803 308.236  0.00  0.00           C  
ATOM   4350  CD1 LEU X 268     216.907 205.287 308.441  0.00  0.00           C  
ATOM   4351  CD2 LEU X 268     217.945 203.242 307.434  0.00  0.00           C  
ATOM   4352  H   LEU X 268     214.595 201.770 308.547  0.00  0.00           H  
ATOM   4353  HA  LEU X 268     217.374 201.224 308.933  0.00  0.00           H  
ATOM   4354  HB2 LEU X 268     215.587 203.284 310.108  0.00  0.00           H  
ATOM   4355  HB3 LEU X 268     217.363 203.373 310.238  0.00  0.00           H  
ATOM   4356  HG  LEU X 268     215.813 203.742 307.619  0.00  0.00           H  
ATOM   4357 HD11 LEU X 268     217.155 205.785 307.503  0.00  0.00           H  
ATOM   4358 HD12 LEU X 268     217.756 205.478 309.098  0.00  0.00           H  
ATOM   4359 HD13 LEU X 268     216.035 205.881 308.715  0.00  0.00           H  
ATOM   4360 HD21 LEU X 268     217.721 202.243 307.060  0.00  0.00           H  
ATOM   4361 HD22 LEU X 268     218.118 203.829 306.533  0.00  0.00           H  
ATOM   4362 HD23 LEU X 268     218.833 203.269 308.065  0.00  0.00           H  
ATOM   4363  N   ILE X 269     215.439 200.641 311.554  0.00  0.00           N  
ATOM   4364  CA  ILE X 269     215.367 199.902 312.822  0.00  0.00           C  
ATOM   4365  C   ILE X 269     215.634 198.423 312.715  0.00  0.00           C  
ATOM   4366  O   ILE X 269     216.355 197.811 313.573  0.00  0.00           O  
ATOM   4367  CB  ILE X 269     214.042 200.133 313.558  0.00  0.00           C  
ATOM   4368  CG1 ILE X 269     213.963 201.536 314.130  0.00  0.00           C  
ATOM   4369  CG2 ILE X 269     213.589 199.195 314.687  0.00  0.00           C  
ATOM   4370  CD1 ILE X 269     212.723 202.024 314.847  0.00  0.00           C  
ATOM   4371  H   ILE X 269     214.542 201.023 311.294  0.00  0.00           H  
ATOM   4372  HA  ILE X 269     216.151 200.202 313.516  0.00  0.00           H  
ATOM   4373  HB  ILE X 269     213.247 200.195 312.815  0.00  0.00           H  
ATOM   4374 HG12 ILE X 269     214.817 201.562 314.807  0.00  0.00           H  
ATOM   4375 HG13 ILE X 269     214.179 202.250 313.335  0.00  0.00           H  
ATOM   4376 HG21 ILE X 269     214.210 199.464 315.541  0.00  0.00           H  
ATOM   4377 HG22 ILE X 269     213.794 198.153 314.443  0.00  0.00           H  
ATOM   4378 HG23 ILE X 269     212.522 199.364 314.833  0.00  0.00           H  
ATOM   4379 HD11 ILE X 269     212.875 202.995 315.318  0.00  0.00           H  
ATOM   4380 HD12 ILE X 269     212.507 201.400 315.713  0.00  0.00           H  
ATOM   4381 HD13 ILE X 269     211.820 202.185 314.259  0.00  0.00           H  
ATOM   4382  N   LYS X 270     215.062 197.834 311.659  0.00  0.00           N  
ATOM   4383  CA  LYS X 270     215.368 196.419 311.376  0.00  0.00           C  
ATOM   4384  C   LYS X 270     216.855 196.242 311.034  0.00  0.00           C  
ATOM   4385  O   LYS X 270     217.558 195.467 311.633  0.00  0.00           O  
ATOM   4386  CB  LYS X 270     214.475 195.795 310.326  0.00  0.00           C  
ATOM   4387  CG  LYS X 270     214.609 194.268 310.099  0.00  0.00           C  
ATOM   4388  CD  LYS X 270     214.526 193.440 311.336  0.00  0.00           C  
ATOM   4389  CE  LYS X 270     214.713 191.925 310.982  0.00  0.00           C  
ATOM   4390  NZ  LYS X 270     214.569 190.983 312.130  0.00  0.00           N1+
ATOM   4391  H   LYS X 270     214.365 198.327 311.118  0.00  0.00           H  
ATOM   4392  HA  LYS X 270     215.254 195.875 312.313  0.00  0.00           H  
ATOM   4393  HB2 LYS X 270     213.433 195.904 310.627  0.00  0.00           H  
ATOM   4394  HB3 LYS X 270     214.672 196.335 309.401  0.00  0.00           H  
ATOM   4395  HG2 LYS X 270     213.836 194.008 309.375  0.00  0.00           H  
ATOM   4396  HG3 LYS X 270     215.565 194.159 309.587  0.00  0.00           H  
ATOM   4397  HD2 LYS X 270     215.382 193.742 311.940  0.00  0.00           H  
ATOM   4398  HD3 LYS X 270     213.605 193.596 311.897  0.00  0.00           H  
ATOM   4399  HE2 LYS X 270     214.066 191.647 310.150  0.00  0.00           H  
ATOM   4400  HE3 LYS X 270     215.725 191.724 310.629  0.00  0.00           H  
ATOM   4401  HZ1 LYS X 270     214.689 190.042 311.782  0.00  0.00           H  
ATOM   4402  HZ2 LYS X 270     213.718 191.013 312.674  0.00  0.00           H  
ATOM   4403  HZ3 LYS X 270     215.336 191.157 312.764  0.00  0.00           H  
ATOM   4404  N   MET X 271     217.411 197.173 310.261  0.00  0.00           N  
ATOM   4405  CA  MET X 271     218.758 197.121 309.693  0.00  0.00           C  
ATOM   4406  C   MET X 271     219.739 197.365 310.888  0.00  0.00           C  
ATOM   4407  O   MET X 271     220.794 196.720 310.996  0.00  0.00           O  
ATOM   4408  CB  MET X 271     218.858 198.138 308.566  0.00  0.00           C  
ATOM   4409  CG  MET X 271     220.307 198.230 308.058  0.00  0.00           C  
ATOM   4410  SD  MET X 271     220.630 199.409 306.740  0.00  0.00           S  
ATOM   4411  CE  MET X 271     221.175 200.807 307.713  0.00  0.00           C  
ATOM   4412  H   MET X 271     216.877 197.942 309.882  0.00  0.00           H  
ATOM   4413  HA  MET X 271     219.059 196.144 309.314  0.00  0.00           H  
ATOM   4414  HB2 MET X 271     218.234 197.930 307.697  0.00  0.00           H  
ATOM   4415  HB3 MET X 271     218.562 199.140 308.875  0.00  0.00           H  
ATOM   4416  HG2 MET X 271     220.956 198.452 308.905  0.00  0.00           H  
ATOM   4417  HG3 MET X 271     220.628 197.299 307.591  0.00  0.00           H  
ATOM   4418  HE1 MET X 271     222.000 200.576 308.388  0.00  0.00           H  
ATOM   4419  HE2 MET X 271     221.535 201.653 307.127  0.00  0.00           H  
ATOM   4420  HE3 MET X 271     220.355 201.196 308.316  0.00  0.00           H  
ATOM   4421  N   GLU X 272     219.429 198.252 311.891  0.00  0.00           N  
ATOM   4422  CA  GLU X 272     220.217 198.485 313.106  0.00  0.00           C  
ATOM   4423  C   GLU X 272     220.230 197.288 313.956  0.00  0.00           C  
ATOM   4424  O   GLU X 272     221.297 197.029 314.564  0.00  0.00           O  
ATOM   4425  CB  GLU X 272     219.845 199.767 313.815  0.00  0.00           C  
ATOM   4426  CG  GLU X 272     220.504 200.276 315.126  0.00  0.00           C  
ATOM   4427  CD  GLU X 272     221.870 200.831 314.985  0.00  0.00           C  
ATOM   4428  OE1 GLU X 272     222.234 201.563 313.993  0.00  0.00           O  
ATOM   4429  OE2 GLU X 272     222.628 200.698 315.963  0.00  0.00           O1-
ATOM   4430  H   GLU X 272     218.636 198.857 311.729  0.00  0.00           H  
ATOM   4431  HA  GLU X 272     221.277 198.605 312.880  0.00  0.00           H  
ATOM   4432  HB2 GLU X 272     219.892 200.577 313.087  0.00  0.00           H  
ATOM   4433  HB3 GLU X 272     218.828 199.656 314.190  0.00  0.00           H  
ATOM   4434  HG2 GLU X 272     219.881 201.022 315.621  0.00  0.00           H  
ATOM   4435  HG3 GLU X 272     220.465 199.339 315.681  0.00  0.00           H  
ATOM   4436  N   LYS X 273     219.132 196.562 314.098  0.00  0.00           N  
ATOM   4437  CA  LYS X 273     219.051 195.319 314.918  0.00  0.00           C  
ATOM   4438  C   LYS X 273     219.609 194.048 314.326  0.00  0.00           C  
ATOM   4439  O   LYS X 273     219.848 193.088 315.052  0.00  0.00           O  
ATOM   4440  CB  LYS X 273     217.621 195.236 315.419  0.00  0.00           C  
ATOM   4441  CG  LYS X 273     217.239 196.371 316.341  0.00  0.00           C  
ATOM   4442  CD  LYS X 273     215.773 196.437 316.638  0.00  0.00           C  
ATOM   4443  CE  LYS X 273     215.396 195.431 317.731  0.00  0.00           C  
ATOM   4444  NZ  LYS X 273     214.052 195.821 318.112  0.00  0.00           N1+
ATOM   4445  H   LYS X 273     218.328 196.865 313.567  0.00  0.00           H  
ATOM   4446  HA  LYS X 273     219.759 195.398 315.743  0.00  0.00           H  
ATOM   4447  HB2 LYS X 273     216.960 195.263 314.552  0.00  0.00           H  
ATOM   4448  HB3 LYS X 273     217.425 194.330 315.992  0.00  0.00           H  
ATOM   4449  HG2 LYS X 273     217.820 196.288 317.260  0.00  0.00           H  
ATOM   4450  HG3 LYS X 273     217.595 197.235 315.779  0.00  0.00           H  
ATOM   4451  HD2 LYS X 273     215.582 197.414 317.082  0.00  0.00           H  
ATOM   4452  HD3 LYS X 273     215.230 196.196 315.724  0.00  0.00           H  
ATOM   4453  HE2 LYS X 273     215.368 194.449 317.260  0.00  0.00           H  
ATOM   4454  HE3 LYS X 273     216.115 195.374 318.549  0.00  0.00           H  
ATOM   4455  HZ1 LYS X 273     213.309 195.353 317.614  0.00  0.00           H  
ATOM   4456  HZ2 LYS X 273     213.805 196.790 317.971  0.00  0.00           H  
ATOM   4457  HZ3 LYS X 273     213.877 195.573 319.075  0.00  0.00           H  
ATOM   4458  N   GLU X 274     220.013 194.051 313.026  0.00  0.00           N  
ATOM   4459  CA  GLU X 274     220.643 192.913 312.315  0.00  0.00           C  
ATOM   4460  C   GLU X 274     222.103 193.167 311.937  0.00  0.00           C  
ATOM   4461  O   GLU X 274     222.673 192.520 311.144  0.00  0.00           O  
ATOM   4462  CB  GLU X 274     219.767 192.522 311.120  0.00  0.00           C  
ATOM   4463  CG  GLU X 274     218.383 192.092 311.504  0.00  0.00           C  
ATOM   4464  CD  GLU X 274     218.216 191.009 312.576  0.00  0.00           C  
ATOM   4465  OE1 GLU X 274     218.993 190.018 312.561  0.00  0.00           O  
ATOM   4466  OE2 GLU X 274     217.266 190.970 313.377  0.00  0.00           O1-
ATOM   4467  H   GLU X 274     219.865 194.883 312.473  0.00  0.00           H  
ATOM   4468  HA  GLU X 274     220.714 191.991 312.892  0.00  0.00           H  
ATOM   4469  HB2 GLU X 274     219.679 193.371 310.442  0.00  0.00           H  
ATOM   4470  HB3 GLU X 274     220.164 191.639 310.620  0.00  0.00           H  
ATOM   4471  HG2 GLU X 274     217.674 192.869 311.790  0.00  0.00           H  
ATOM   4472  HG3 GLU X 274     217.875 191.708 310.619  0.00  0.00           H  
ATOM   4473  N   LYS X 275     222.683 194.248 312.553  0.00  0.00           N  
ATOM   4474  CA  LYS X 275     224.041 194.742 312.288  0.00  0.00           C  
ATOM   4475  C   LYS X 275     225.205 193.819 312.665  0.00  0.00           C  
ATOM   4476  O   LYS X 275     226.275 194.339 312.410  0.00  0.00           O  
ATOM   4477  CB  LYS X 275     224.266 196.179 312.861  0.00  0.00           C  
ATOM   4478  CG  LYS X 275     224.395 196.271 314.379  0.00  0.00           C  
ATOM   4479  CD  LYS X 275     224.501 197.734 314.837  0.00  0.00           C  
ATOM   4480  CE  LYS X 275     224.672 197.686 316.400  0.00  0.00           C  
ATOM   4481  NZ  LYS X 275     224.691 199.062 316.899  0.00  0.00           N1+
ATOM   4482  H   LYS X 275     222.230 194.690 313.340  0.00  0.00           H  
ATOM   4483  HA  LYS X 275     224.177 194.703 311.207  0.00  0.00           H  
ATOM   4484  HB2 LYS X 275     225.142 196.609 312.376  0.00  0.00           H  
ATOM   4485  HB3 LYS X 275     223.442 196.819 312.547  0.00  0.00           H  
ATOM   4486  HG2 LYS X 275     223.546 195.770 314.844  0.00  0.00           H  
ATOM   4487  HG3 LYS X 275     225.309 195.733 314.631  0.00  0.00           H  
ATOM   4488  HD2 LYS X 275     225.384 198.179 314.378  0.00  0.00           H  
ATOM   4489  HD3 LYS X 275     223.711 198.407 314.506  0.00  0.00           H  
ATOM   4490  HE2 LYS X 275     223.808 197.156 316.802  0.00  0.00           H  
ATOM   4491  HE3 LYS X 275     225.591 197.130 316.587  0.00  0.00           H  
ATOM   4492  HZ1 LYS X 275     225.515 199.445 316.459  0.00  0.00           H  
ATOM   4493  HZ2 LYS X 275     224.666 199.100 317.908  0.00  0.00           H  
ATOM   4494  HZ3 LYS X 275     223.890 199.585 316.576  0.00  0.00           H  
ATOM   4495  N   GLN X 276     224.995 192.612 313.150  0.00  0.00           N  
ATOM   4496  CA  GLN X 276     226.049 191.699 313.575  0.00  0.00           C  
ATOM   4497  C   GLN X 276     226.946 191.132 312.483  0.00  0.00           C  
ATOM   4498  O   GLN X 276     228.144 191.144 312.644  0.00  0.00           O  
ATOM   4499  CB  GLN X 276     225.492 190.515 314.439  0.00  0.00           C  
ATOM   4500  CG  GLN X 276     224.478 191.015 315.494  0.00  0.00           C  
ATOM   4501  CD  GLN X 276     222.988 190.896 315.132  0.00  0.00           C  
ATOM   4502  NE2 GLN X 276     222.061 190.868 316.079  0.00  0.00           N  
ATOM   4503  OE1 GLN X 276     222.649 190.777 313.958  0.00  0.00           O  
ATOM   4504  H   GLN X 276     224.040 192.361 313.361  0.00  0.00           H  
ATOM   4505  HA  GLN X 276     226.700 192.315 314.195  0.00  0.00           H  
ATOM   4506  HB2 GLN X 276     224.980 189.827 313.766  0.00  0.00           H  
ATOM   4507  HB3 GLN X 276     226.286 189.950 314.929  0.00  0.00           H  
ATOM   4508  HG2 GLN X 276     224.645 190.422 316.393  0.00  0.00           H  
ATOM   4509  HG3 GLN X 276     224.740 192.058 315.673  0.00  0.00           H  
ATOM   4510 HE21 GLN X 276     221.089 190.822 315.811  0.00  0.00           H  
ATOM   4511 HE22 GLN X 276     222.339 190.811 317.048  0.00  0.00           H  
ATOM   4512  N   ASN X 277     226.303 190.638 311.392  0.00  0.00           N  
ATOM   4513  CA  ASN X 277     226.963 190.096 310.194  0.00  0.00           C  
ATOM   4514  C   ASN X 277     227.311 191.182 309.189  0.00  0.00           C  
ATOM   4515  O   ASN X 277     226.400 191.965 308.859  0.00  0.00           O  
ATOM   4516  CB  ASN X 277     226.039 188.996 309.669  0.00  0.00           C  
ATOM   4517  CG  ASN X 277     225.903 187.848 310.572  0.00  0.00           C  
ATOM   4518  ND2 ASN X 277     226.116 186.666 310.030  0.00  0.00           N  
ATOM   4519  OD1 ASN X 277     225.820 187.927 311.782  0.00  0.00           O  
ATOM   4520  H   ASN X 277     225.301 190.760 311.351  0.00  0.00           H  
ATOM   4521  HA  ASN X 277     227.898 189.612 310.478  0.00  0.00           H  
ATOM   4522  HB2 ASN X 277     225.122 189.556 309.486  0.00  0.00           H  
ATOM   4523  HB3 ASN X 277     226.444 188.725 308.694  0.00  0.00           H  
ATOM   4524 HD21 ASN X 277     226.119 186.468 309.040  0.00  0.00           H  
ATOM   4525 HD22 ASN X 277     225.984 185.902 310.676  0.00  0.00           H  
ATOM   4526  N   GLN X 278     228.558 191.194 308.707  0.00  0.00           N  
ATOM   4527  CA  GLN X 278     228.948 192.050 307.570  0.00  0.00           C  
ATOM   4528  C   GLN X 278     228.120 191.954 306.317  0.00  0.00           C  
ATOM   4529  O   GLN X 278     227.916 192.882 305.497  0.00  0.00           O  
ATOM   4530  CB  GLN X 278     230.474 191.858 307.309  0.00  0.00           C  
ATOM   4531  CG  GLN X 278     231.366 192.205 308.556  0.00  0.00           C  
ATOM   4532  CD  GLN X 278     232.753 191.797 308.335  0.00  0.00           C  
ATOM   4533  NE2 GLN X 278     233.384 192.058 307.246  0.00  0.00           N  
ATOM   4534  OE1 GLN X 278     233.323 191.015 309.119  0.00  0.00           O  
ATOM   4535  H   GLN X 278     229.153 190.502 309.140  0.00  0.00           H  
ATOM   4536  HA  GLN X 278     228.818 193.075 307.917  0.00  0.00           H  
ATOM   4537  HB2 GLN X 278     230.797 190.860 307.013  0.00  0.00           H  
ATOM   4538  HB3 GLN X 278     230.716 192.530 306.485  0.00  0.00           H  
ATOM   4539  HG2 GLN X 278     231.388 193.289 308.671  0.00  0.00           H  
ATOM   4540  HG3 GLN X 278     231.008 191.844 309.520  0.00  0.00           H  
ATOM   4541 HE21 GLN X 278     234.381 191.918 307.171  0.00  0.00           H  
ATOM   4542 HE22 GLN X 278     233.023 192.516 306.421  0.00  0.00           H  
ATOM   4543  N   GLN X 279     227.578 190.692 306.127  0.00  0.00           N  
ATOM   4544  CA  GLN X 279     226.853 190.247 304.958  0.00  0.00           C  
ATOM   4545  C   GLN X 279     225.318 190.237 305.205  0.00  0.00           C  
ATOM   4546  O   GLN X 279     224.672 189.267 304.867  0.00  0.00           O  
ATOM   4547  CB  GLN X 279     227.425 188.871 304.531  0.00  0.00           C  
ATOM   4548  CG  GLN X 279     228.810 188.972 303.914  0.00  0.00           C  
ATOM   4549  CD  GLN X 279     229.967 189.089 304.890  0.00  0.00           C  
ATOM   4550  NE2 GLN X 279     230.797 190.098 304.642  0.00  0.00           N  
ATOM   4551  OE1 GLN X 279     229.922 188.556 306.034  0.00  0.00           O  
ATOM   4552  H   GLN X 279     227.839 190.007 306.822  0.00  0.00           H  
ATOM   4553  HA  GLN X 279     226.969 190.922 304.110  0.00  0.00           H  
ATOM   4554  HB2 GLN X 279     227.376 188.173 305.366  0.00  0.00           H  
ATOM   4555  HB3 GLN X 279     226.773 188.354 303.827  0.00  0.00           H  
ATOM   4556  HG2 GLN X 279     228.911 188.039 303.359  0.00  0.00           H  
ATOM   4557  HG3 GLN X 279     228.745 189.806 303.214  0.00  0.00           H  
ATOM   4558 HE21 GLN X 279     231.726 190.015 305.031  0.00  0.00           H  
ATOM   4559 HE22 GLN X 279     230.653 190.768 303.901  0.00  0.00           H  
ATOM   4560  N   SER X 280     224.720 191.306 305.780  0.00  0.00           N  
ATOM   4561  CA  SER X 280     223.300 191.488 305.809  0.00  0.00           C  
ATOM   4562  C   SER X 280     222.628 191.839 304.516  0.00  0.00           C  
ATOM   4563  O   SER X 280     223.203 192.508 303.686  0.00  0.00           O  
ATOM   4564  CB  SER X 280     222.980 192.392 306.987  0.00  0.00           C  
ATOM   4565  OG  SER X 280     221.599 192.586 307.141  0.00  0.00           O  
ATOM   4566  H   SER X 280     225.290 192.124 305.941  0.00  0.00           H  
ATOM   4567  HA  SER X 280     222.982 190.485 306.092  0.00  0.00           H  
ATOM   4568  HB2 SER X 280     223.548 192.006 307.833  0.00  0.00           H  
ATOM   4569  HB3 SER X 280     223.360 193.390 306.771  0.00  0.00           H  
ATOM   4570  HG  SER X 280     221.327 193.145 307.873  0.00  0.00           H  
ATOM   4571  N   GLU X 281     221.422 191.375 304.210  0.00  0.00           N  
ATOM   4572  CA  GLU X 281     220.612 191.755 303.060  0.00  0.00           C  
ATOM   4573  C   GLU X 281     219.999 193.111 303.159  0.00  0.00           C  
ATOM   4574  O   GLU X 281     219.525 193.761 302.218  0.00  0.00           O  
ATOM   4575  CB  GLU X 281     219.514 190.665 302.730  0.00  0.00           C  
ATOM   4576  CG  GLU X 281     220.074 189.176 302.726  0.00  0.00           C  
ATOM   4577  CD  GLU X 281     221.225 188.774 301.789  0.00  0.00           C  
ATOM   4578  OE1 GLU X 281     221.453 189.503 300.767  0.00  0.00           O  
ATOM   4579  OE2 GLU X 281     221.802 187.678 301.872  0.00  0.00           O1-
ATOM   4580  H   GLU X 281     221.025 190.700 304.848  0.00  0.00           H  
ATOM   4581  HA  GLU X 281     221.226 191.755 302.159  0.00  0.00           H  
ATOM   4582  HB2 GLU X 281     218.701 190.658 303.456  0.00  0.00           H  
ATOM   4583  HB3 GLU X 281     219.094 190.964 301.770  0.00  0.00           H  
ATOM   4584  HG2 GLU X 281     220.484 189.037 303.726  0.00  0.00           H  
ATOM   4585  HG3 GLU X 281     219.230 188.525 302.499  0.00  0.00           H  
ATOM   4586  N   PHE X 282     219.910 193.624 304.464  0.00  0.00           N  
ATOM   4587  CA  PHE X 282     219.532 194.999 304.780  0.00  0.00           C  
ATOM   4588  C   PHE X 282     220.648 195.976 304.381  0.00  0.00           C  
ATOM   4589  O   PHE X 282     221.781 195.998 304.881  0.00  0.00           O  
ATOM   4590  CB  PHE X 282     219.107 195.191 306.206  0.00  0.00           C  
ATOM   4591  CG  PHE X 282     217.959 194.347 306.639  0.00  0.00           C  
ATOM   4592  CD1 PHE X 282     216.737 194.964 306.549  0.00  0.00           C  
ATOM   4593  CD2 PHE X 282     218.094 193.041 306.909  0.00  0.00           C  
ATOM   4594  CE1 PHE X 282     215.552 194.156 306.721  0.00  0.00           C  
ATOM   4595  CE2 PHE X 282     216.993 192.268 307.169  0.00  0.00           C  
ATOM   4596  CZ  PHE X 282     215.785 192.819 307.014  0.00  0.00           C  
ATOM   4597  H   PHE X 282     220.242 193.074 305.243  0.00  0.00           H  
ATOM   4598  HA  PHE X 282     218.729 195.221 304.078  0.00  0.00           H  
ATOM   4599  HB2 PHE X 282     219.920 195.124 306.930  0.00  0.00           H  
ATOM   4600  HB3 PHE X 282     218.802 196.229 306.338  0.00  0.00           H  
ATOM   4601  HD1 PHE X 282     216.647 196.028 306.388  0.00  0.00           H  
ATOM   4602  HD2 PHE X 282     219.061 192.562 306.863  0.00  0.00           H  
ATOM   4603  HE1 PHE X 282     214.539 194.524 306.795  0.00  0.00           H  
ATOM   4604  HE2 PHE X 282     217.222 191.220 307.289  0.00  0.00           H  
ATOM   4605  HZ  PHE X 282     214.876 192.236 307.024  0.00  0.00           H  
ATOM   4606  N   THR X 283     220.221 196.850 303.467  0.00  0.00           N  
ATOM   4607  CA  THR X 283     221.076 197.982 302.871  0.00  0.00           C  
ATOM   4608  C   THR X 283     220.130 198.927 302.189  0.00  0.00           C  
ATOM   4609  O   THR X 283     219.005 198.626 301.724  0.00  0.00           O  
ATOM   4610  CB  THR X 283     222.157 197.443 301.903  0.00  0.00           C  
ATOM   4611  CG2 THR X 283     221.636 196.625 300.728  0.00  0.00           C  
ATOM   4612  OG1 THR X 283     222.938 198.540 301.425  0.00  0.00           O  
ATOM   4613  H   THR X 283     219.310 196.660 303.075  0.00  0.00           H  
ATOM   4614  HA  THR X 283     221.591 198.441 303.716  0.00  0.00           H  
ATOM   4615  HB  THR X 283     222.787 196.720 302.421  0.00  0.00           H  
ATOM   4616  HG1 THR X 283     223.016 199.220 302.098  0.00  0.00           H  
ATOM   4617 HG21 THR X 283     221.335 197.235 299.876  0.00  0.00           H  
ATOM   4618 HG22 THR X 283     220.848 195.958 301.080  0.00  0.00           H  
ATOM   4619 HG23 THR X 283     222.449 195.950 300.464  0.00  0.00           H  
ATOM   4620  N   ILE X 284     220.490 200.205 302.251  0.00  0.00           N  
ATOM   4621  CA  ILE X 284     219.574 201.239 301.885  0.00  0.00           C  
ATOM   4622  C   ILE X 284     219.360 201.369 300.373  0.00  0.00           C  
ATOM   4623  O   ILE X 284     218.308 201.783 299.964  0.00  0.00           O  
ATOM   4624  CB  ILE X 284     219.955 202.629 302.529  0.00  0.00           C  
ATOM   4625  CG1 ILE X 284     219.770 202.488 304.044  0.00  0.00           C  
ATOM   4626  CG2 ILE X 284     219.243 203.799 301.934  0.00  0.00           C  
ATOM   4627  CD1 ILE X 284     220.740 203.320 304.876  0.00  0.00           C  
ATOM   4628  H   ILE X 284     221.445 200.404 302.513  0.00  0.00           H  
ATOM   4629  HA  ILE X 284     218.644 201.024 302.411  0.00  0.00           H  
ATOM   4630  HB  ILE X 284     221.040 202.717 302.463  0.00  0.00           H  
ATOM   4631 HG12 ILE X 284     218.746 202.808 304.238  0.00  0.00           H  
ATOM   4632 HG13 ILE X 284     219.811 201.441 304.342  0.00  0.00           H  
ATOM   4633 HG21 ILE X 284     219.750 204.712 302.244  0.00  0.00           H  
ATOM   4634 HG22 ILE X 284     218.157 203.782 302.027  0.00  0.00           H  
ATOM   4635 HG23 ILE X 284     219.495 203.831 300.874  0.00  0.00           H  
ATOM   4636 HD11 ILE X 284     220.330 203.619 305.841  0.00  0.00           H  
ATOM   4637 HD12 ILE X 284     220.847 204.293 304.396  0.00  0.00           H  
ATOM   4638 HD13 ILE X 284     221.696 202.801 304.928  0.00  0.00           H  
ATOM   4639  N   GLU X 285     220.214 200.859 299.472  0.00  0.00           N  
ATOM   4640  CA  GLU X 285     219.862 200.645 298.033  0.00  0.00           C  
ATOM   4641  C   GLU X 285     218.766 199.643 297.826  0.00  0.00           C  
ATOM   4642  O   GLU X 285     217.999 199.710 296.875  0.00  0.00           O  
ATOM   4643  CB  GLU X 285     221.087 200.107 297.247  0.00  0.00           C  
ATOM   4644  CG  GLU X 285     222.088 201.218 296.894  0.00  0.00           C  
ATOM   4645  CD  GLU X 285     221.710 202.050 295.720  0.00  0.00           C  
ATOM   4646  OE1 GLU X 285     221.767 203.301 295.841  0.00  0.00           O  
ATOM   4647  OE2 GLU X 285     221.512 201.434 294.626  0.00  0.00           O1-
ATOM   4648  H   GLU X 285     221.152 200.591 299.733  0.00  0.00           H  
ATOM   4649  HA  GLU X 285     219.507 201.533 297.510  0.00  0.00           H  
ATOM   4650  HB2 GLU X 285     221.587 199.483 297.988  0.00  0.00           H  
ATOM   4651  HB3 GLU X 285     220.853 199.498 296.374  0.00  0.00           H  
ATOM   4652  HG2 GLU X 285     222.143 201.801 297.814  0.00  0.00           H  
ATOM   4653  HG3 GLU X 285     222.997 200.644 296.716  0.00  0.00           H  
ATOM   4654  N   ASN X 286     218.727 198.645 298.695  0.00  0.00           N  
ATOM   4655  CA  ASN X 286     217.538 197.768 298.807  0.00  0.00           C  
ATOM   4656  C   ASN X 286     216.196 198.421 299.296  0.00  0.00           C  
ATOM   4657  O   ASN X 286     215.158 198.207 298.668  0.00  0.00           O  
ATOM   4658  CB  ASN X 286     217.980 196.508 299.625  0.00  0.00           C  
ATOM   4659  CG  ASN X 286     217.198 195.211 299.391  0.00  0.00           C  
ATOM   4660  ND2 ASN X 286     217.604 194.194 300.093  0.00  0.00           N  
ATOM   4661  OD1 ASN X 286     216.264 195.115 298.611  0.00  0.00           O  
ATOM   4662  H   ASN X 286     219.297 198.703 299.527  0.00  0.00           H  
ATOM   4663  HA  ASN X 286     217.224 197.497 297.799  0.00  0.00           H  
ATOM   4664  HB2 ASN X 286     219.024 196.259 299.432  0.00  0.00           H  
ATOM   4665  HB3 ASN X 286     217.883 196.685 300.696  0.00  0.00           H  
ATOM   4666 HD21 ASN X 286     218.393 194.215 300.724  0.00  0.00           H  
ATOM   4667 HD22 ASN X 286     217.076 193.335 300.029  0.00  0.00           H  
ATOM   4668  N   LEU X 287     216.233 199.342 300.216  0.00  0.00           N  
ATOM   4669  CA  LEU X 287     215.135 200.033 300.824  0.00  0.00           C  
ATOM   4670  C   LEU X 287     214.404 200.943 299.930  0.00  0.00           C  
ATOM   4671  O   LEU X 287     213.150 200.866 299.921  0.00  0.00           O  
ATOM   4672  CB  LEU X 287     215.726 200.880 301.997  0.00  0.00           C  
ATOM   4673  CG  LEU X 287     214.732 201.746 302.895  0.00  0.00           C  
ATOM   4674  CD1 LEU X 287     215.533 202.383 304.030  0.00  0.00           C  
ATOM   4675  CD2 LEU X 287     214.070 203.001 302.183  0.00  0.00           C  
ATOM   4676  H   LEU X 287     217.147 199.539 300.599  0.00  0.00           H  
ATOM   4677  HA  LEU X 287     214.539 199.225 301.248  0.00  0.00           H  
ATOM   4678  HB2 LEU X 287     216.378 200.326 302.672  0.00  0.00           H  
ATOM   4679  HB3 LEU X 287     216.323 201.660 301.524  0.00  0.00           H  
ATOM   4680  HG  LEU X 287     214.012 201.090 303.385  0.00  0.00           H  
ATOM   4681 HD11 LEU X 287     216.272 203.134 303.752  0.00  0.00           H  
ATOM   4682 HD12 LEU X 287     216.156 201.590 304.444  0.00  0.00           H  
ATOM   4683 HD13 LEU X 287     214.921 202.751 304.854  0.00  0.00           H  
ATOM   4684 HD21 LEU X 287     214.718 203.618 301.561  0.00  0.00           H  
ATOM   4685 HD22 LEU X 287     213.208 202.630 301.628  0.00  0.00           H  
ATOM   4686 HD23 LEU X 287     213.627 203.556 303.009  0.00  0.00           H  
ATOM   4687  N   VAL X 288     215.071 201.799 299.100  0.00  0.00           N  
ATOM   4688  CA  VAL X 288     214.534 202.595 297.965  0.00  0.00           C  
ATOM   4689  C   VAL X 288     213.785 201.761 296.947  0.00  0.00           C  
ATOM   4690  O   VAL X 288     212.570 201.897 296.714  0.00  0.00           O  
ATOM   4691  CB  VAL X 288     215.542 203.368 297.205  0.00  0.00           C  
ATOM   4692  CG1 VAL X 288     214.930 204.058 295.989  0.00  0.00           C  
ATOM   4693  CG2 VAL X 288     216.304 204.365 298.042  0.00  0.00           C  
ATOM   4694  H   VAL X 288     216.069 201.800 299.254  0.00  0.00           H  
ATOM   4695  HA  VAL X 288     213.708 203.250 298.244  0.00  0.00           H  
ATOM   4696  HB  VAL X 288     216.274 202.680 296.782  0.00  0.00           H  
ATOM   4697 HG11 VAL X 288     215.631 204.637 295.389  0.00  0.00           H  
ATOM   4698 HG12 VAL X 288     214.537 203.330 295.279  0.00  0.00           H  
ATOM   4699 HG13 VAL X 288     214.109 204.724 296.256  0.00  0.00           H  
ATOM   4700 HG21 VAL X 288     216.720 203.904 298.938  0.00  0.00           H  
ATOM   4701 HG22 VAL X 288     215.585 205.141 298.304  0.00  0.00           H  
ATOM   4702 HG23 VAL X 288     217.136 204.763 297.461  0.00  0.00           H  
ATOM   4703  N   ILE X 289     214.434 200.605 296.580  0.00  0.00           N  
ATOM   4704  CA  ILE X 289     213.849 199.764 295.564  0.00  0.00           C  
ATOM   4705  C   ILE X 289     212.691 198.960 296.261  0.00  0.00           C  
ATOM   4706  O   ILE X 289     211.647 198.726 295.635  0.00  0.00           O  
ATOM   4707  CB  ILE X 289     214.827 198.756 294.803  0.00  0.00           C  
ATOM   4708  CG1 ILE X 289     215.974 199.439 294.046  0.00  0.00           C  
ATOM   4709  CG2 ILE X 289     214.144 197.807 293.820  0.00  0.00           C  
ATOM   4710  CD1 ILE X 289     215.516 200.164 292.803  0.00  0.00           C  
ATOM   4711  H   ILE X 289     215.373 200.380 296.875  0.00  0.00           H  
ATOM   4712  HA  ILE X 289     213.315 200.419 294.876  0.00  0.00           H  
ATOM   4713  HB  ILE X 289     215.275 198.170 295.604  0.00  0.00           H  
ATOM   4714 HG12 ILE X 289     216.323 200.226 294.714  0.00  0.00           H  
ATOM   4715 HG13 ILE X 289     216.811 198.766 293.863  0.00  0.00           H  
ATOM   4716 HG21 ILE X 289     214.835 197.033 293.485  0.00  0.00           H  
ATOM   4717 HG22 ILE X 289     213.662 198.336 292.998  0.00  0.00           H  
ATOM   4718 HG23 ILE X 289     213.330 197.348 294.380  0.00  0.00           H  
ATOM   4719 HD11 ILE X 289     214.530 200.592 292.985  0.00  0.00           H  
ATOM   4720 HD12 ILE X 289     215.429 199.405 292.026  0.00  0.00           H  
ATOM   4721 HD13 ILE X 289     216.301 200.877 292.551  0.00  0.00           H  
ATOM   4722  N   THR X 290     212.735 198.629 297.545  0.00  0.00           N  
ATOM   4723  CA  THR X 290     211.716 197.866 298.294  0.00  0.00           C  
ATOM   4724  C   THR X 290     210.469 198.813 298.381  0.00  0.00           C  
ATOM   4725  O   THR X 290     209.321 198.316 298.282  0.00  0.00           O  
ATOM   4726  CB  THR X 290     212.265 197.421 299.652  0.00  0.00           C  
ATOM   4727  CG2 THR X 290     211.373 196.786 300.761  0.00  0.00           C  
ATOM   4728  OG1 THR X 290     213.219 196.411 299.430  0.00  0.00           O  
ATOM   4729  H   THR X 290     213.654 198.706 297.955  0.00  0.00           H  
ATOM   4730  HA  THR X 290     211.396 196.986 297.735  0.00  0.00           H  
ATOM   4731  HB  THR X 290     212.840 198.207 300.140  0.00  0.00           H  
ATOM   4732  HG1 THR X 290     214.049 196.844 299.219  0.00  0.00           H  
ATOM   4733 HG21 THR X 290     211.079 195.754 300.565  0.00  0.00           H  
ATOM   4734 HG22 THR X 290     210.460 197.336 300.989  0.00  0.00           H  
ATOM   4735 HG23 THR X 290     211.944 196.825 301.689  0.00  0.00           H  
ATOM   4736  N   ALA X 291     210.619 200.076 298.776  0.00  0.00           N  
ATOM   4737  CA  ALA X 291     209.537 201.052 298.807  0.00  0.00           C  
ATOM   4738  C   ALA X 291     208.778 201.083 297.547  0.00  0.00           C  
ATOM   4739  O   ALA X 291     207.567 201.004 297.565  0.00  0.00           O  
ATOM   4740  CB  ALA X 291     210.065 202.379 299.286  0.00  0.00           C  
ATOM   4741  H   ALA X 291     211.574 200.390 298.874  0.00  0.00           H  
ATOM   4742  HA  ALA X 291     208.756 200.758 299.508  0.00  0.00           H  
ATOM   4743  HB1 ALA X 291     209.176 202.996 299.420  0.00  0.00           H  
ATOM   4744  HB2 ALA X 291     210.737 202.804 298.539  0.00  0.00           H  
ATOM   4745  HB3 ALA X 291     210.486 202.277 300.286  0.00  0.00           H  
ATOM   4746  N   ALA X 292     209.598 201.288 296.476  0.00  0.00           N  
ATOM   4747  CA  ALA X 292     209.046 201.336 295.094  0.00  0.00           C  
ATOM   4748  C   ALA X 292     208.221 200.059 294.764  0.00  0.00           C  
ATOM   4749  O   ALA X 292     207.158 200.262 294.065  0.00  0.00           O  
ATOM   4750  CB  ALA X 292     210.149 201.708 294.100  0.00  0.00           C  
ATOM   4751  H   ALA X 292     210.594 201.294 296.643  0.00  0.00           H  
ATOM   4752  HA  ALA X 292     208.310 202.139 295.068  0.00  0.00           H  
ATOM   4753  HB1 ALA X 292     209.827 201.625 293.062  0.00  0.00           H  
ATOM   4754  HB2 ALA X 292     211.081 201.193 294.331  0.00  0.00           H  
ATOM   4755  HB3 ALA X 292     210.322 202.772 294.256  0.00  0.00           H  
ATOM   4756  N   ASP X 293     208.717 198.910 295.140  0.00  0.00           N  
ATOM   4757  CA  ASP X 293     208.066 197.700 294.716  0.00  0.00           C  
ATOM   4758  C   ASP X 293     206.733 197.440 295.428  0.00  0.00           C  
ATOM   4759  O   ASP X 293     205.837 196.891 294.842  0.00  0.00           O  
ATOM   4760  CB  ASP X 293     208.994 196.515 295.041  0.00  0.00           C  
ATOM   4761  CG  ASP X 293     210.045 196.242 293.936  0.00  0.00           C  
ATOM   4762  OD1 ASP X 293     210.820 195.300 294.101  0.00  0.00           O  
ATOM   4763  OD2 ASP X 293     210.048 196.961 292.919  0.00  0.00           O1-
ATOM   4764  H   ASP X 293     209.642 198.894 295.545  0.00  0.00           H  
ATOM   4765  HA  ASP X 293     207.775 197.757 293.667  0.00  0.00           H  
ATOM   4766  HB2 ASP X 293     209.470 196.607 296.017  0.00  0.00           H  
ATOM   4767  HB3 ASP X 293     208.361 195.632 295.124  0.00  0.00           H  
ATOM   4768  N   LEU X 294     206.678 197.783 296.741  0.00  0.00           N  
ATOM   4769  CA  LEU X 294     205.449 197.875 297.526  0.00  0.00           C  
ATOM   4770  C   LEU X 294     204.465 198.980 296.966  0.00  0.00           C  
ATOM   4771  O   LEU X 294     203.345 198.756 296.616  0.00  0.00           O  
ATOM   4772  CB  LEU X 294     205.847 198.241 298.942  0.00  0.00           C  
ATOM   4773  CG  LEU X 294     204.652 198.055 299.930  0.00  0.00           C  
ATOM   4774  CD1 LEU X 294     204.088 196.587 299.999  0.00  0.00           C  
ATOM   4775  CD2 LEU X 294     205.201 198.344 301.300  0.00  0.00           C  
ATOM   4776  H   LEU X 294     207.538 198.167 297.106  0.00  0.00           H  
ATOM   4777  HA  LEU X 294     205.040 196.866 297.472  0.00  0.00           H  
ATOM   4778  HB2 LEU X 294     206.708 197.660 299.273  0.00  0.00           H  
ATOM   4779  HB3 LEU X 294     206.136 199.292 298.965  0.00  0.00           H  
ATOM   4780  HG  LEU X 294     203.828 198.740 299.732  0.00  0.00           H  
ATOM   4781 HD11 LEU X 294     203.639 196.440 299.017  0.00  0.00           H  
ATOM   4782 HD12 LEU X 294     203.282 196.559 300.732  0.00  0.00           H  
ATOM   4783 HD13 LEU X 294     204.816 195.791 300.152  0.00  0.00           H  
ATOM   4784 HD21 LEU X 294     204.484 198.237 302.114  0.00  0.00           H  
ATOM   4785 HD22 LEU X 294     205.969 197.628 301.593  0.00  0.00           H  
ATOM   4786 HD23 LEU X 294     205.676 199.324 301.358  0.00  0.00           H  
ATOM   4787  N   LEU X 295     204.946 200.209 296.739  0.00  0.00           N  
ATOM   4788  CA  LEU X 295     204.104 201.318 296.310  0.00  0.00           C  
ATOM   4789  C   LEU X 295     203.553 201.178 294.875  0.00  0.00           C  
ATOM   4790  O   LEU X 295     202.409 201.558 294.678  0.00  0.00           O  
ATOM   4791  CB  LEU X 295     204.790 202.663 296.550  0.00  0.00           C  
ATOM   4792  CG  LEU X 295     204.088 203.923 296.262  0.00  0.00           C  
ATOM   4793  CD1 LEU X 295     202.831 203.947 296.994  0.00  0.00           C  
ATOM   4794  CD2 LEU X 295     204.890 205.106 296.783  0.00  0.00           C  
ATOM   4795  H   LEU X 295     205.917 200.350 296.977  0.00  0.00           H  
ATOM   4796  HA  LEU X 295     203.279 201.386 297.018  0.00  0.00           H  
ATOM   4797  HB2 LEU X 295     205.086 202.749 297.595  0.00  0.00           H  
ATOM   4798  HB3 LEU X 295     205.702 202.712 295.955  0.00  0.00           H  
ATOM   4799  HG  LEU X 295     203.923 203.914 295.185  0.00  0.00           H  
ATOM   4800 HD11 LEU X 295     202.369 204.918 296.817  0.00  0.00           H  
ATOM   4801 HD12 LEU X 295     203.025 203.906 298.066  0.00  0.00           H  
ATOM   4802 HD13 LEU X 295     202.130 203.229 296.569  0.00  0.00           H  
ATOM   4803 HD21 LEU X 295     205.756 205.223 296.131  0.00  0.00           H  
ATOM   4804 HD22 LEU X 295     204.314 206.029 296.714  0.00  0.00           H  
ATOM   4805 HD23 LEU X 295     205.242 205.056 297.814  0.00  0.00           H  
ATOM   4806  N   GLY X 296     204.329 200.661 293.935  0.00  0.00           N  
ATOM   4807  CA  GLY X 296     203.905 200.646 292.550  0.00  0.00           C  
ATOM   4808  C   GLY X 296     202.845 199.588 292.270  0.00  0.00           C  
ATOM   4809  O   GLY X 296     201.794 200.034 291.957  0.00  0.00           O  
ATOM   4810  H   GLY X 296     205.291 200.484 294.188  0.00  0.00           H  
ATOM   4811  HA2 GLY X 296     203.565 201.619 292.194  0.00  0.00           H  
ATOM   4812  HA3 GLY X 296     204.741 200.285 291.951  0.00  0.00           H  
ATOM   4813  N   ALA X 297     203.129 198.297 292.538  0.00  0.00           N  
ATOM   4814  CA  ALA X 297     202.127 197.234 292.703  0.00  0.00           C  
ATOM   4815  C   ALA X 297     200.914 197.752 293.416  0.00  0.00           C  
ATOM   4816  O   ALA X 297     199.800 197.694 292.938  0.00  0.00           O  
ATOM   4817  CB  ALA X 297     202.787 195.987 293.292  0.00  0.00           C  
ATOM   4818  H   ALA X 297     204.076 197.970 292.660  0.00  0.00           H  
ATOM   4819  HA  ALA X 297     201.808 196.880 291.722  0.00  0.00           H  
ATOM   4820  HB1 ALA X 297     203.008 196.126 294.351  0.00  0.00           H  
ATOM   4821  HB2 ALA X 297     203.769 195.900 292.826  0.00  0.00           H  
ATOM   4822  HB3 ALA X 297     202.139 195.113 293.228  0.00  0.00           H  
ATOM   4823  N   GLY X 298     201.042 198.447 294.556  0.00  0.00           N  
ATOM   4824  CA  GLY X 298     199.883 198.987 295.312  0.00  0.00           C  
ATOM   4825  C   GLY X 298     199.065 200.159 294.768  0.00  0.00           C  
ATOM   4826  O   GLY X 298     197.844 200.119 294.928  0.00  0.00           O  
ATOM   4827  H   GLY X 298     201.981 198.459 294.927  0.00  0.00           H  
ATOM   4828  HA2 GLY X 298     199.163 198.213 295.577  0.00  0.00           H  
ATOM   4829  HA3 GLY X 298     200.313 199.435 296.208  0.00  0.00           H  
ATOM   4830  N   THR X 299     199.654 201.016 294.003  0.00  0.00           N  
ATOM   4831  CA  THR X 299     199.070 202.127 293.206  0.00  0.00           C  
ATOM   4832  C   THR X 299     198.186 201.439 292.133  0.00  0.00           C  
ATOM   4833  O   THR X 299     197.143 201.962 291.771  0.00  0.00           O  
ATOM   4834  CB  THR X 299     200.200 203.012 292.674  0.00  0.00           C  
ATOM   4835  CG2 THR X 299     199.706 204.168 291.868  0.00  0.00           C  
ATOM   4836  OG1 THR X 299     200.774 203.567 293.801  0.00  0.00           O  
ATOM   4837  H   THR X 299     200.663 201.033 293.971  0.00  0.00           H  
ATOM   4838  HA  THR X 299     198.356 202.726 293.771  0.00  0.00           H  
ATOM   4839  HB  THR X 299     200.908 202.457 292.058  0.00  0.00           H  
ATOM   4840  HG1 THR X 299     201.568 203.071 294.011  0.00  0.00           H  
ATOM   4841 HG21 THR X 299     200.475 204.935 291.777  0.00  0.00           H  
ATOM   4842 HG22 THR X 299     198.798 204.705 292.144  0.00  0.00           H  
ATOM   4843 HG23 THR X 299     199.640 203.895 290.815  0.00  0.00           H  
ATOM   4844  N   GLU X 300     198.551 200.236 291.674  0.00  0.00           N  
ATOM   4845  CA  GLU X 300     197.901 199.715 290.481  0.00  0.00           C  
ATOM   4846  C   GLU X 300     196.770 198.638 290.769  0.00  0.00           C  
ATOM   4847  O   GLU X 300     195.630 198.753 290.283  0.00  0.00           O  
ATOM   4848  CB  GLU X 300     198.944 198.970 289.693  0.00  0.00           C  
ATOM   4849  CG  GLU X 300     198.550 198.506 288.257  0.00  0.00           C  
ATOM   4850  CD  GLU X 300     198.168 199.570 287.281  0.00  0.00           C  
ATOM   4851  OE1 GLU X 300     197.391 199.354 286.334  0.00  0.00           O  
ATOM   4852  OE2 GLU X 300     198.635 200.699 287.512  0.00  0.00           O1-
ATOM   4853  H   GLU X 300     199.261 199.720 292.175  0.00  0.00           H  
ATOM   4854  HA  GLU X 300     197.485 200.499 289.849  0.00  0.00           H  
ATOM   4855  HB2 GLU X 300     199.799 199.646 289.728  0.00  0.00           H  
ATOM   4856  HB3 GLU X 300     199.292 198.065 290.191  0.00  0.00           H  
ATOM   4857  HG2 GLU X 300     199.343 197.834 287.928  0.00  0.00           H  
ATOM   4858  HG3 GLU X 300     197.725 197.798 288.341  0.00  0.00           H  
ATOM   4859  N   THR X 301     197.076 197.647 291.656  0.00  0.00           N  
ATOM   4860  CA  THR X 301     196.149 196.664 292.131  0.00  0.00           C  
ATOM   4861  C   THR X 301     194.928 197.342 292.849  0.00  0.00           C  
ATOM   4862  O   THR X 301     193.780 197.140 292.544  0.00  0.00           O  
ATOM   4863  CB  THR X 301     196.772 195.689 293.082  0.00  0.00           C  
ATOM   4864  CG2 THR X 301     198.003 194.906 292.537  0.00  0.00           C  
ATOM   4865  OG1 THR X 301     197.321 196.280 294.245  0.00  0.00           O  
ATOM   4866  H   THR X 301     197.942 197.659 292.175  0.00  0.00           H  
ATOM   4867  HA  THR X 301     195.693 196.161 291.279  0.00  0.00           H  
ATOM   4868  HB  THR X 301     196.064 194.914 293.377  0.00  0.00           H  
ATOM   4869  HG1 THR X 301     197.396 195.473 294.759  0.00  0.00           H  
ATOM   4870 HG21 THR X 301     197.634 194.023 292.017  0.00  0.00           H  
ATOM   4871 HG22 THR X 301     198.597 194.406 293.302  0.00  0.00           H  
ATOM   4872 HG23 THR X 301     198.677 195.591 292.021  0.00  0.00           H  
ATOM   4873  N   THR X 302     195.225 198.250 293.811  0.00  0.00           N  
ATOM   4874  CA  THR X 302     194.062 198.751 294.609  0.00  0.00           C  
ATOM   4875  C   THR X 302     193.047 199.636 293.866  0.00  0.00           C  
ATOM   4876  O   THR X 302     191.849 199.360 293.702  0.00  0.00           O  
ATOM   4877  CB  THR X 302     194.563 199.581 295.866  0.00  0.00           C  
ATOM   4878  CG2 THR X 302     195.268 198.689 296.940  0.00  0.00           C  
ATOM   4879  OG1 THR X 302     195.395 200.706 295.547  0.00  0.00           O  
ATOM   4880  H   THR X 302     196.146 198.094 294.194  0.00  0.00           H  
ATOM   4881  HA  THR X 302     193.548 197.925 295.099  0.00  0.00           H  
ATOM   4882  HB  THR X 302     193.712 200.020 296.387  0.00  0.00           H  
ATOM   4883  HG1 THR X 302     196.293 200.371 295.499  0.00  0.00           H  
ATOM   4884 HG21 THR X 302     196.234 198.378 296.544  0.00  0.00           H  
ATOM   4885 HG22 THR X 302     194.482 197.974 297.185  0.00  0.00           H  
ATOM   4886 HG23 THR X 302     195.468 199.246 297.855  0.00  0.00           H  
ATOM   4887  N   SER X 303     193.566 200.703 293.237  0.00  0.00           N  
ATOM   4888  CA  SER X 303     192.801 201.512 292.271  0.00  0.00           C  
ATOM   4889  C   SER X 303     192.057 200.717 291.146  0.00  0.00           C  
ATOM   4890  O   SER X 303     190.833 200.954 290.987  0.00  0.00           O  
ATOM   4891  CB  SER X 303     193.748 202.433 291.536  0.00  0.00           C  
ATOM   4892  OG  SER X 303     194.696 201.745 290.810  0.00  0.00           O  
ATOM   4893  H   SER X 303     194.532 200.947 293.401  0.00  0.00           H  
ATOM   4894  HA  SER X 303     192.069 202.119 292.804  0.00  0.00           H  
ATOM   4895  HB2 SER X 303     193.199 203.117 290.888  0.00  0.00           H  
ATOM   4896  HB3 SER X 303     194.250 203.072 292.263  0.00  0.00           H  
ATOM   4897  HG  SER X 303     195.443 201.643 291.404  0.00  0.00           H  
ATOM   4898  N   THR X 304     192.675 199.853 290.437  0.00  0.00           N  
ATOM   4899  CA  THR X 304     191.948 199.225 289.297  0.00  0.00           C  
ATOM   4900  C   THR X 304     190.859 198.295 289.855  0.00  0.00           C  
ATOM   4901  O   THR X 304     189.753 198.108 289.330  0.00  0.00           O  
ATOM   4902  CB  THR X 304     192.762 198.330 288.388  0.00  0.00           C  
ATOM   4903  CG2 THR X 304     192.123 198.038 287.010  0.00  0.00           C  
ATOM   4904  OG1 THR X 304     194.033 198.965 288.219  0.00  0.00           O  
ATOM   4905  H   THR X 304     193.643 199.632 290.622  0.00  0.00           H  
ATOM   4906  HA  THR X 304     191.554 200.105 288.787  0.00  0.00           H  
ATOM   4907  HB  THR X 304     192.993 197.384 288.879  0.00  0.00           H  
ATOM   4908  HG1 THR X 304     194.599 198.685 288.943  0.00  0.00           H  
ATOM   4909 HG21 THR X 304     192.789 197.585 286.276  0.00  0.00           H  
ATOM   4910 HG22 THR X 304     191.775 198.986 286.601  0.00  0.00           H  
ATOM   4911 HG23 THR X 304     191.213 197.457 287.162  0.00  0.00           H  
ATOM   4912  N   THR X 305     191.146 197.735 291.025  0.00  0.00           N  
ATOM   4913  CA  THR X 305     190.145 196.921 291.705  0.00  0.00           C  
ATOM   4914  C   THR X 305     188.904 197.631 292.239  0.00  0.00           C  
ATOM   4915  O   THR X 305     187.807 197.209 291.964  0.00  0.00           O  
ATOM   4916  CB  THR X 305     190.778 196.116 292.827  0.00  0.00           C  
ATOM   4917  CG2 THR X 305     189.677 195.165 293.431  0.00  0.00           C  
ATOM   4918  OG1 THR X 305     191.885 195.353 292.311  0.00  0.00           O  
ATOM   4919  H   THR X 305     192.100 197.792 291.349  0.00  0.00           H  
ATOM   4920  HA  THR X 305     189.739 196.268 290.932  0.00  0.00           H  
ATOM   4921  HB  THR X 305     191.140 196.803 293.591  0.00  0.00           H  
ATOM   4922  HG1 THR X 305     192.644 195.938 292.375  0.00  0.00           H  
ATOM   4923 HG21 THR X 305     188.994 194.828 292.651  0.00  0.00           H  
ATOM   4924 HG22 THR X 305     189.052 195.780 294.079  0.00  0.00           H  
ATOM   4925 HG23 THR X 305     189.996 194.344 294.073  0.00  0.00           H  
ATOM   4926  N   LEU X 306     189.083 198.812 292.797  0.00  0.00           N  
ATOM   4927  CA  LEU X 306     188.026 199.669 293.238  0.00  0.00           C  
ATOM   4928  C   LEU X 306     187.246 200.216 292.009  0.00  0.00           C  
ATOM   4929  O   LEU X 306     186.048 200.248 292.066  0.00  0.00           O  
ATOM   4930  CB  LEU X 306     188.679 200.737 294.092  0.00  0.00           C  
ATOM   4931  CG  LEU X 306     187.671 201.709 294.823  0.00  0.00           C  
ATOM   4932  CD1 LEU X 306     186.775 201.012 295.795  0.00  0.00           C  
ATOM   4933  CD2 LEU X 306     188.467 202.743 295.561  0.00  0.00           C  
ATOM   4934  H   LEU X 306     190.014 199.088 293.074  0.00  0.00           H  
ATOM   4935  HA  LEU X 306     187.372 199.091 293.892  0.00  0.00           H  
ATOM   4936  HB2 LEU X 306     189.272 200.236 294.857  0.00  0.00           H  
ATOM   4937  HB3 LEU X 306     189.392 201.322 293.511  0.00  0.00           H  
ATOM   4938  HG  LEU X 306     186.968 202.134 294.107  0.00  0.00           H
[truncated: 6,700,515 more chars]
