# Supplementary material for: Differing Membrane Interactions of Two Highly Similar Drug-Metabolizing Cytochrome P450 Isoforms: CYP 2C9 and CYP 2C19
Source: Int J Mol Sci. 2019 Sep 4;20(18):4328. doi: 10.3390/ijms20184328 (PMC6770661; doi:10.3390/ijms20184328)
Supplement: Supplementary file 1 [file ijms-20-04328-s001.zip › CYP_2C9_2C19_pdb/2C19_SIM1_final_noW.pdb]

CRYST1  140.143  142.188  160.412  90.00  90.00  90.00 P 1           1
ATOM      1  N   MET X   1     139.402 132.811 156.506  1.00  0.00           N
ATOM      2  H1  MET X   1     138.888 133.108 155.689  1.00  0.00           H
ATOM      3  H2  MET X   1     139.619 131.839 156.338  1.00  0.00           H
ATOM      4  H3  MET X   1     140.294 133.283 156.504  1.00  0.00           H
ATOM      5  CA  MET X   1     138.601 133.034 157.721  1.00  0.00           C
ATOM      6  HA  MET X   1     137.595 132.701 157.464  1.00  0.00           H
ATOM      7  CB  MET X   1     139.099 132.264 158.987  1.00  0.00           C
ATOM      8  HB2 MET X   1     138.558 132.671 159.842  1.00  0.00           H
ATOM      9  HB3 MET X   1     138.987 131.193 158.819  1.00  0.00           H
ATOM     10  CG  MET X   1     140.589 132.574 159.119  1.00  0.00           C
ATOM     11  HG2 MET X   1     141.090 132.039 158.312  1.00  0.00           H
ATOM     12  HG3 MET X   1     140.736 133.645 158.974  1.00  0.00           H
ATOM     13  SD  MET X   1     141.129 132.093 160.771  1.00  0.00           S
ATOM     14  CE  MET X   1     142.139 133.417 161.416  1.00  0.00           C
ATOM     15  HE1 MET X   1     143.188 133.348 161.126  1.00  0.00           H
ATOM     16  HE2 MET X   1     141.700 134.340 161.037  1.00  0.00           H
ATOM     17  HE3 MET X   1     142.105 133.440 162.505  1.00  0.00           H
ATOM     18  C   MET X   1     138.488 134.490 157.979  1.00  0.00           C
ATOM     19  O   MET X   1     139.429 135.269 157.998  1.00  0.00           O
ATOM     20  N   ASP X   2     137.225 134.839 158.081  1.00  0.00           N
ATOM     21  H   ASP X   2     136.592 134.068 158.240  1.00  0.00           H
ATOM     22  CA  ASP X   2     136.768 136.219 158.119  1.00  0.00           C
ATOM     23  HA  ASP X   2     137.304 136.794 157.364  1.00  0.00           H
ATOM     24  CB  ASP X   2     135.296 136.415 157.874  1.00  0.00           C
ATOM     25  HB2 ASP X   2     135.114 136.078 156.854  1.00  0.00           H
ATOM     26  HB3 ASP X   2     134.830 135.823 158.661  1.00  0.00           H
ATOM     27  CG  ASP X   2     134.909 137.901 157.895  1.00  0.00           C
ATOM     28  OD1 ASP X   2     134.467 138.370 158.948  1.00  0.00           O
ATOM     29  OD2 ASP X   2     134.963 138.506 156.731  1.00  0.00           O
ATOM     30  C   ASP X   2     137.056 136.753 159.540  1.00  0.00           C
ATOM     31  O   ASP X   2     136.557 136.231 160.513  1.00  0.00           O
ATOM     32  N   PRO X   3     137.757 137.950 159.669  1.00  0.00           N
ATOM     33  CD  PRO X   3     138.366 138.697 158.577  1.00  0.00           C
ATOM     34  HD2 PRO X   3     137.561 139.270 158.117  1.00  0.00           H
ATOM     35  HD3 PRO X   3     138.790 137.966 157.890  1.00  0.00           H
ATOM     36  CG  PRO X   3     139.444 139.502 159.260  1.00  0.00           C
ATOM     37  HG2 PRO X   3     139.841 140.371 158.736  1.00  0.00           H
ATOM     38  HG3 PRO X   3     140.264 138.816 159.468  1.00  0.00           H
ATOM     39  CB  PRO X   3     138.780 139.886 160.588  1.00  0.00           C
ATOM     40  HB2 PRO X   3     138.012 140.646 160.444  1.00  0.00           H
ATOM     41  HB3 PRO X   3     139.453 140.108 161.416  1.00  0.00           H
ATOM     42  CA  PRO X   3     138.079 138.589 160.939  1.00  0.00           C
ATOM     43  HA  PRO X   3     138.759 137.981 161.535  1.00  0.00           H
ATOM     44  C   PRO X   3     136.832 138.820 161.815  1.00  0.00           C
ATOM     45  O   PRO X   3     136.961 138.544 163.053  1.00  0.00           O
ATOM     46  N   PHE X   4     135.652 139.291 161.246  1.00  0.00           N
ATOM     47  H   PHE X   4     135.447 139.324 160.258  1.00  0.00           H
ATOM     48  CA  PHE X   4     134.533 139.493 162.110  1.00  0.00           C
ATOM     49  HA  PHE X   4     134.882 139.957 163.033  1.00  0.00           H
ATOM     50  CB  PHE X   4     133.615 140.564 161.477  1.00  0.00           C
ATOM     51  HB2 PHE X   4     133.151 140.227 160.550  1.00  0.00           H
ATOM     52  HB3 PHE X   4     132.815 140.748 162.195  1.00  0.00           H
ATOM     53  CG  PHE X   4     134.227 141.911 161.358  1.00  0.00           C
ATOM     54  CD1 PHE X   4     134.304 142.829 162.433  1.00  0.00           C
ATOM     55  HD1 PHE X   4     134.003 142.576 163.439  1.00  0.00           H
ATOM     56  CE1 PHE X   4     134.871 144.132 162.221  1.00  0.00           C
ATOM     57  HE1 PHE X   4     134.951 144.861 163.014  1.00  0.00           H
ATOM     58  CZ  PHE X   4     135.438 144.440 161.042  1.00  0.00           C
ATOM     59  HZ  PHE X   4     135.980 145.354 160.850  1.00  0.00           H
ATOM     60  CE2 PHE X   4     135.557 143.406 160.058  1.00  0.00           C
ATOM     61  HE2 PHE X   4     136.198 143.623 159.217  1.00  0.00           H
ATOM     62  CD2 PHE X   4     134.991 142.157 160.207  1.00  0.00           C
ATOM     63  HD2 PHE X   4     135.161 141.394 159.462  1.00  0.00           H
ATOM     64  C   PHE X   4     133.709 138.242 162.463  1.00  0.00           C
ATOM     65  O   PHE X   4     133.187 138.107 163.580  1.00  0.00           O
ATOM     66  N   VAL X   5     133.667 137.228 161.629  1.00  0.00           N
ATOM     67  H   VAL X   5     133.924 137.449 160.678  1.00  0.00           H
ATOM     68  CA  VAL X   5     133.074 135.862 161.891  1.00  0.00           C
ATOM     69  HA  VAL X   5     132.035 136.060 162.152  1.00  0.00           H
ATOM     70  CB  VAL X   5     133.146 134.870 160.700  1.00  0.00           C
ATOM     71  HB  VAL X   5     134.160 134.602 160.403  1.00  0.00           H
ATOM     72  CG1 VAL X   5     132.601 133.461 161.057  1.00  0.00           C
ATOM     73 HG11 VAL X   5     133.251 132.886 161.717  1.00  0.00           H
ATOM     74 HG12 VAL X   5     131.578 133.478 161.435  1.00  0.00           H
ATOM     75 HG13 VAL X   5     132.452 132.803 160.201  1.00  0.00           H
ATOM     76  CG2 VAL X   5     132.276 135.335 159.590  1.00  0.00           C
ATOM     77 HG21 VAL X   5     132.241 134.516 158.871  1.00  0.00           H
ATOM     78 HG22 VAL X   5     132.859 136.200 159.274  1.00  0.00           H
ATOM     79 HG23 VAL X   5     131.289 135.679 159.898  1.00  0.00           H
ATOM     80  C   VAL X   5     133.753 135.150 163.069  1.00  0.00           C
ATOM     81  O   VAL X   5     133.057 134.773 163.981  1.00  0.00           O
ATOM     82  N   VAL X   6     135.079 135.305 163.136  1.00  0.00           N
ATOM     83  H   VAL X   6     135.569 135.543 162.286  1.00  0.00           H
ATOM     84  CA  VAL X   6     135.913 134.849 164.224  1.00  0.00           C
ATOM     85  HA  VAL X   6     135.613 133.836 164.493  1.00  0.00           H
ATOM     86  CB  VAL X   6     137.397 135.018 163.823  1.00  0.00           C
ATOM     87  HB  VAL X   6     137.485 136.043 163.464  1.00  0.00           H
ATOM     88  CG1 VAL X   6     138.382 134.884 164.977  1.00  0.00           C
ATOM     89 HG11 VAL X   6     138.362 133.875 165.389  1.00  0.00           H
ATOM     90 HG12 VAL X   6     139.365 135.059 164.539  1.00  0.00           H
ATOM     91 HG13 VAL X   6     138.214 135.666 165.718  1.00  0.00           H
ATOM     92  CG2 VAL X   6     137.820 134.124 162.604  1.00  0.00           C
ATOM     93 HG21 VAL X   6     138.834 134.259 162.228  1.00  0.00           H
ATOM     94 HG22 VAL X   6     137.191 134.445 161.774  1.00  0.00           H
ATOM     95 HG23 VAL X   6     137.765 133.059 162.832  1.00  0.00           H
ATOM     96  C   VAL X   6     135.549 135.653 165.496  1.00  0.00           C
ATOM     97  O   VAL X   6     135.487 135.017 166.562  1.00  0.00           O
ATOM     98  N   LEU X   7     135.270 136.933 165.395  1.00  0.00           N
ATOM     99  H   LEU X   7     135.235 137.332 164.468  1.00  0.00           H
ATOM    100  CA  LEU X   7     134.753 137.667 166.572  1.00  0.00           C
ATOM    101  HA  LEU X   7     135.512 137.410 167.311  1.00  0.00           H
ATOM    102  CB  LEU X   7     134.721 139.150 166.135  1.00  0.00           C
ATOM    103  HB2 LEU X   7     135.445 139.309 165.336  1.00  0.00           H
ATOM    104  HB3 LEU X   7     133.698 139.308 165.793  1.00  0.00           H
ATOM    105  CG  LEU X   7     134.940 140.066 167.328  1.00  0.00           C
ATOM    106  HG  LEU X   7     134.722 141.042 166.894  1.00  0.00           H
ATOM    107  CD1 LEU X   7     133.880 139.912 168.420  1.00  0.00           C
ATOM    108 HD11 LEU X   7     133.904 140.592 169.272  1.00  0.00           H
ATOM    109 HD12 LEU X   7     134.203 139.026 168.967  1.00  0.00           H
ATOM    110 HD13 LEU X   7     132.900 139.926 167.945  1.00  0.00           H
ATOM    111  CD2 LEU X   7     136.368 139.876 167.878  1.00  0.00           C
ATOM    112 HD21 LEU X   7     136.770 140.757 168.378  1.00  0.00           H
ATOM    113 HD22 LEU X   7     136.416 139.053 168.592  1.00  0.00           H
ATOM    114 HD23 LEU X   7     137.015 139.677 167.024  1.00  0.00           H
ATOM    115  C   LEU X   7     133.430 137.190 167.092  1.00  0.00           C
ATOM    116  O   LEU X   7     133.238 136.885 168.262  1.00  0.00           O
ATOM    117  N   VAL X   8     132.535 136.919 166.103  1.00  0.00           N
ATOM    118  H   VAL X   8     132.742 137.256 165.174  1.00  0.00           H
ATOM    119  CA  VAL X   8     131.255 136.226 166.348  1.00  0.00           C
ATOM    120  HA  VAL X   8     130.777 136.958 166.999  1.00  0.00           H
ATOM    121  CB  VAL X   8     130.334 136.315 165.085  1.00  0.00           C
ATOM    122  HB  VAL X   8     130.743 135.915 164.158  1.00  0.00           H
ATOM    123  CG1 VAL X   8     129.019 135.521 165.234  1.00  0.00           C
ATOM    124 HG11 VAL X   8     129.262 134.465 165.115  1.00  0.00           H
ATOM    125 HG12 VAL X   8     128.573 135.739 166.205  1.00  0.00           H
ATOM    126 HG13 VAL X   8     128.390 135.759 164.377  1.00  0.00           H
ATOM    127  CG2 VAL X   8     130.029 137.777 164.801  1.00  0.00           C
ATOM    128 HG21 VAL X   8     129.136 138.090 165.342  1.00  0.00           H
ATOM    129 HG22 VAL X   8     129.759 137.842 163.747  1.00  0.00           H
ATOM    130 HG23 VAL X   8     130.864 138.435 165.038  1.00  0.00           H
ATOM    131  C   VAL X   8     131.311 134.928 167.090  1.00  0.00           C
ATOM    132  O   VAL X   8     130.566 134.776 168.038  1.00  0.00           O
ATOM    133  N   LEU X   9     132.255 134.037 166.759  1.00  0.00           N
ATOM    134  H   LEU X   9     132.788 134.187 165.914  1.00  0.00           H
ATOM    135  CA  LEU X   9     132.453 132.783 167.525  1.00  0.00           C
ATOM    136  HA  LEU X   9     131.584 132.173 167.770  1.00  0.00           H
ATOM    137  CB  LEU X   9     133.419 131.874 166.697  1.00  0.00           C
ATOM    138  HB2 LEU X   9     134.393 132.353 166.596  1.00  0.00           H
ATOM    139  HB3 LEU X   9     133.659 130.941 167.205  1.00  0.00           H
ATOM    140  CG  LEU X   9     132.963 131.411 165.308  1.00  0.00           C
ATOM    141  HG  LEU X   9     132.754 132.325 164.753  1.00  0.00           H
ATOM    142  CD1 LEU X   9     134.179 130.739 164.683  1.00  0.00           C
ATOM    143 HD11 LEU X   9     135.042 131.361 164.923  1.00  0.00           H
ATOM    144 HD12 LEU X   9     134.130 130.741 163.594  1.00  0.00           H
ATOM    145 HD13 LEU X   9     134.371 129.817 165.230  1.00  0.00           H
ATOM    146  CD2 LEU X   9     131.855 130.425 165.234  1.00  0.00           C
ATOM    147 HD21 LEU X   9     131.791 129.788 166.116  1.00  0.00           H
ATOM    148 HD22 LEU X   9     130.883 130.917 165.208  1.00  0.00           H
ATOM    149 HD23 LEU X   9     132.001 129.775 164.372  1.00  0.00           H
ATOM    150  C   LEU X   9     133.037 132.970 168.889  1.00  0.00           C
ATOM    151  O   LEU X   9     132.402 132.447 169.868  1.00  0.00           O
ATOM    152  N   CYS X  10     134.159 133.717 168.979  1.00  0.00           N
ATOM    153  H   CYS X  10     134.556 134.154 168.159  1.00  0.00           H
ATOM    154  CA  CYS X  10     134.767 134.176 170.205  1.00  0.00           C
ATOM    155  HA  CYS X  10     135.223 133.317 170.695  1.00  0.00           H
ATOM    156  CB  CYS X  10     135.765 135.281 169.969  1.00  0.00           C
ATOM    157  HB2 CYS X  10     135.377 135.982 169.230  1.00  0.00           H
ATOM    158  HB3 CYS X  10     135.985 135.689 170.956  1.00  0.00           H
ATOM    159  SG  CYS X  10     137.267 134.596 169.247  1.00  0.00           S
ATOM    160  HG  CYS X  10     136.915 134.328 167.987  1.00  0.00           H
ATOM    161  C   CYS X  10     133.648 134.638 171.123  1.00  0.00           C
ATOM    162  O   CYS X  10     133.597 134.190 172.280  1.00  0.00           O
ATOM    163  N   LEU X  11     132.712 135.486 170.678  1.00  0.00           N
ATOM    164  H   LEU X  11     133.057 136.002 169.881  1.00  0.00           H
ATOM    165  CA  LEU X  11     131.605 136.135 171.396  1.00  0.00           C
ATOM    166  HA  LEU X  11     132.120 136.495 172.286  1.00  0.00           H
ATOM    167  CB  LEU X  11     131.041 137.328 170.606  1.00  0.00           C
ATOM    168  HB2 LEU X  11     131.935 137.930 170.447  1.00  0.00           H
ATOM    169  HB3 LEU X  11     130.771 137.104 169.573  1.00  0.00           H
ATOM    170  CG  LEU X  11     129.975 138.238 171.192  1.00  0.00           C
ATOM    171  HG  LEU X  11     128.988 137.793 171.068  1.00  0.00           H
ATOM    172  CD1 LEU X  11     130.208 138.584 172.688  1.00  0.00           C
ATOM    173 HD11 LEU X  11     131.209 139.006 172.779  1.00  0.00           H
ATOM    174 HD12 LEU X  11     130.132 137.653 173.249  1.00  0.00           H
ATOM    175 HD13 LEU X  11     129.473 139.298 173.060  1.00  0.00           H
ATOM    176  CD2 LEU X  11     130.001 139.598 170.464  1.00  0.00           C
ATOM    177 HD21 LEU X  11     129.452 140.282 171.111  1.00  0.00           H
ATOM    178 HD22 LEU X  11     130.981 139.986 170.187  1.00  0.00           H
ATOM    179 HD23 LEU X  11     129.583 139.459 169.467  1.00  0.00           H
ATOM    180  C   LEU X  11     130.506 135.174 171.730  1.00  0.00           C
ATOM    181  O   LEU X  11     130.197 135.141 172.916  1.00  0.00           O
ATOM    182  N   SER X  12     129.974 134.406 170.827  1.00  0.00           N
ATOM    183  H   SER X  12     130.196 134.613 169.863  1.00  0.00           H
ATOM    184  CA  SER X  12     129.122 133.329 171.089  1.00  0.00           C
ATOM    185  HA  SER X  12     128.189 133.783 171.422  1.00  0.00           H
ATOM    186  CB  SER X  12     128.947 132.576 169.760  1.00  0.00           C
ATOM    187  HB2 SER X  12     129.917 132.225 169.407  1.00  0.00           H
ATOM    188  HB3 SER X  12     128.220 131.808 170.023  1.00  0.00           H
ATOM    189  OG  SER X  12     128.353 133.392 168.747  1.00  0.00           O
ATOM    190  HG  SER X  12     129.044 133.938 168.365  1.00  0.00           H
ATOM    191  C   SER X  12     129.561 132.299 172.126  1.00  0.00           C
ATOM    192  O   SER X  12     128.694 131.882 172.973  1.00  0.00           O
ATOM    193  N   CYS X  13     130.838 131.942 172.300  1.00  0.00           N
ATOM    194  H   CYS X  13     131.512 132.335 171.658  1.00  0.00           H
ATOM    195  CA  CYS X  13     131.367 131.100 173.409  1.00  0.00           C
ATOM    196  HA  CYS X  13     130.870 130.130 173.378  1.00  0.00           H
ATOM    197  CB  CYS X  13     132.863 130.903 173.274  1.00  0.00           C
ATOM    198  HB2 CYS X  13     133.263 131.909 173.145  1.00  0.00           H
ATOM    199  HB3 CYS X  13     133.313 130.443 174.154  1.00  0.00           H
ATOM    200  SG  CYS X  13     133.123 129.857 171.769  1.00  0.00           S
ATOM    201  HG  CYS X  13     132.740 130.875 170.992  1.00  0.00           H
ATOM    202  C   CYS X  13     131.054 131.647 174.777  1.00  0.00           C
ATOM    203  O   CYS X  13     130.748 130.853 175.670  1.00  0.00           O
ATOM    204  N   LEU X  14     131.011 132.925 174.912  1.00  0.00           N
ATOM    205  H   LEU X  14     131.300 133.493 174.128  1.00  0.00           H
ATOM    206  CA  LEU X  14     130.706 133.508 176.235  1.00  0.00           C
ATOM    207  HA  LEU X  14     131.250 132.899 176.958  1.00  0.00           H
ATOM    208  CB  LEU X  14     131.198 134.875 176.396  1.00  0.00           C
ATOM    209  HB2 LEU X  14     130.772 135.570 175.673  1.00  0.00           H
ATOM    210  HB3 LEU X  14     131.038 135.177 177.431  1.00  0.00           H
ATOM    211  CG  LEU X  14     132.648 135.082 176.153  1.00  0.00           C
ATOM    212  HG  LEU X  14     132.878 134.751 175.140  1.00  0.00           H
ATOM    213  CD1 LEU X  14     133.025 136.616 176.186  1.00  0.00           C
ATOM    214 HD11 LEU X  14     132.496 137.052 177.033  1.00  0.00           H
ATOM    215 HD12 LEU X  14     132.634 137.094 175.288  1.00  0.00           H
ATOM    216 HD13 LEU X  14     134.087 136.855 176.249  1.00  0.00           H
ATOM    217  CD2 LEU X  14     133.541 134.332 177.225  1.00  0.00           C
ATOM    218 HD21 LEU X  14     134.183 134.993 177.807  1.00  0.00           H
ATOM    219 HD22 LEU X  14     132.941 133.723 177.901  1.00  0.00           H
ATOM    220 HD23 LEU X  14     134.089 133.491 176.801  1.00  0.00           H
ATOM    221  C   LEU X  14     129.241 133.460 176.554  1.00  0.00           C
ATOM    222  O   LEU X  14     128.908 133.301 177.749  1.00  0.00           O
ATOM    223  N   LEU X  15     128.374 133.427 175.557  1.00  0.00           N
ATOM    224  H   LEU X  15     128.796 133.535 174.646  1.00  0.00           H
ATOM    225  CA  LEU X  15     127.006 133.249 175.703  1.00  0.00           C
ATOM    226  HA  LEU X  15     126.616 133.902 176.483  1.00  0.00           H
ATOM    227  CB  LEU X  15     126.212 133.622 174.468  1.00  0.00           C
ATOM    228  HB2 LEU X  15     126.344 132.838 173.723  1.00  0.00           H
ATOM    229  HB3 LEU X  15     125.166 133.618 174.778  1.00  0.00           H
ATOM    230  CG  LEU X  15     126.703 134.939 173.802  1.00  0.00           C
ATOM    231  HG  LEU X  15     127.684 134.833 173.338  1.00  0.00           H
ATOM    232  CD1 LEU X  15     125.768 135.129 172.648  1.00  0.00           C
ATOM    233 HD11 LEU X  15     125.745 134.215 172.055  1.00  0.00           H
ATOM    234 HD12 LEU X  15     126.192 135.885 171.988  1.00  0.00           H
ATOM    235 HD13 LEU X  15     124.765 135.472 172.902  1.00  0.00           H
ATOM    236  CD2 LEU X  15     126.766 136.155 174.680  1.00  0.00           C
ATOM    237 HD21 LEU X  15     125.780 136.417 175.063  1.00  0.00           H
ATOM    238 HD22 LEU X  15     127.307 135.953 175.605  1.00  0.00           H
ATOM    239 HD23 LEU X  15     127.269 136.927 174.097  1.00  0.00           H
ATOM    240  C   LEU X  15     126.716 131.823 175.989  1.00  0.00           C
ATOM    241  O   LEU X  15     125.929 131.474 176.879  1.00  0.00           O
ATOM    242  N   LEU X  16     127.345 130.877 175.275  1.00  0.00           N
ATOM    243  H   LEU X  16     128.018 131.087 174.552  1.00  0.00           H
ATOM    244  CA  LEU X  16     127.157 129.459 175.504  1.00  0.00           C
ATOM    245  HA  LEU X  16     126.098 129.198 175.505  1.00  0.00           H
ATOM    246  CB  LEU X  16     127.830 128.494 174.483  1.00  0.00           C
ATOM    247  HB2 LEU X  16     128.886 128.761 174.454  1.00  0.00           H
ATOM    248  HB3 LEU X  16     127.763 127.489 174.899  1.00  0.00           H
ATOM    249  CG  LEU X  16     127.155 128.698 173.102  1.00  0.00           C
ATOM    250  HG  LEU X  16     127.004 129.763 172.929  1.00  0.00           H
ATOM    251  CD1 LEU X  16     127.965 127.995 172.066  1.00  0.00           C
ATOM    252 HD11 LEU X  16     129.023 128.193 172.236  1.00  0.00           H
ATOM    253 HD12 LEU X  16     127.699 128.408 171.093  1.00  0.00           H
ATOM    254 HD13 LEU X  16     127.822 126.915 172.098  1.00  0.00           H
ATOM    255  CD2 LEU X  16     125.715 128.210 173.005  1.00  0.00           C
ATOM    256 HD21 LEU X  16     125.283 128.199 172.004  1.00  0.00           H
ATOM    257 HD22 LEU X  16     125.549 127.233 173.458  1.00  0.00           H
ATOM    258 HD23 LEU X  16     125.028 128.829 173.582  1.00  0.00           H
ATOM    259  C   LEU X  16     127.660 129.029 176.854  1.00  0.00           C
ATOM    260  O   LEU X  16     127.119 128.172 177.530  1.00  0.00           O
ATOM    261  N   LEU X  17     128.746 129.690 177.259  1.00  0.00           N
ATOM    262  H   LEU X  17     129.181 130.335 176.614  1.00  0.00           H
ATOM    263  CA  LEU X  17     129.371 129.436 178.545  1.00  0.00           C
ATOM    264  HA  LEU X  17     129.505 128.366 178.704  1.00  0.00           H
ATOM    265  CB  LEU X  17     130.719 130.149 178.636  1.00  0.00           C
ATOM    266  HB2 LEU X  17     131.446 129.671 177.980  1.00  0.00           H
ATOM    267  HB3 LEU X  17     130.615 131.214 178.429  1.00  0.00           H
ATOM    268  CG  LEU X  17     131.396 130.080 180.080  1.00  0.00           C
ATOM    269  HG  LEU X  17     130.809 130.594 180.841  1.00  0.00           H
ATOM    270  CD1 LEU X  17     131.561 128.562 180.498  1.00  0.00           C
ATOM    271 HD11 LEU X  17     131.912 128.040 179.608  1.00  0.00           H
ATOM    272 HD12 LEU X  17     130.569 128.158 180.702  1.00  0.00           H
ATOM    273 HD13 LEU X  17     132.156 128.461 181.406  1.00  0.00           H
ATOM    274  CD2 LEU X  17     132.789 130.620 180.105  1.00  0.00           C
ATOM    275 HD21 LEU X  17     133.250 130.353 181.056  1.00  0.00           H
ATOM    276 HD22 LEU X  17     133.307 130.246 179.222  1.00  0.00           H
ATOM    277 HD23 LEU X  17     132.703 131.707 180.125  1.00  0.00           H
ATOM    278  C   LEU X  17     128.416 129.853 179.671  1.00  0.00           C
ATOM    279  O   LEU X  17     128.155 129.138 180.625  1.00  0.00           O
ATOM    280  N   SER X  18     127.669 131.017 179.546  1.00  0.00           N
ATOM    281  H   SER X  18     127.850 131.661 178.789  1.00  0.00           H
ATOM    282  CA  SER X  18     126.639 131.417 180.477  1.00  0.00           C
ATOM    283  HA  SER X  18     127.003 131.419 181.505  1.00  0.00           H
ATOM    284  CB  SER X  18     126.209 132.832 180.225  1.00  0.00           C
ATOM    285  HB2 SER X  18     127.101 133.457 180.250  1.00  0.00           H
ATOM    286  HB3 SER X  18     125.825 133.067 179.232  1.00  0.00           H
ATOM    287  OG  SER X  18     125.419 133.406 181.164  1.00  0.00           O
ATOM    288  HG  SER X  18     124.506 133.151 181.011  1.00  0.00           H
ATOM    289  C   SER X  18     125.372 130.472 180.438  1.00  0.00           C
ATOM    290  O   SER X  18     124.780 130.063 181.434  1.00  0.00           O
ATOM    291  N   ILE X  19     124.953 129.882 179.293  1.00  0.00           N
ATOM    292  H   ILE X  19     125.450 130.147 178.455  1.00  0.00           H
ATOM    293  CA  ILE X  19     123.919 128.813 179.204  1.00  0.00           C
ATOM    294  HA  ILE X  19     122.970 129.142 179.628  1.00  0.00           H
ATOM    295  CB  ILE X  19     123.569 128.479 177.706  1.00  0.00           C
ATOM    296  HB  ILE X  19     124.456 128.165 177.157  1.00  0.00           H
ATOM    297  CG2 ILE X  19     122.667 127.151 177.673  1.00  0.00           C
ATOM    298 HG21 ILE X  19     121.677 127.436 178.029  1.00  0.00           H
ATOM    299 HG22 ILE X  19     123.017 126.351 178.326  1.00  0.00           H
ATOM    300 HG23 ILE X  19     122.563 126.879 176.623  1.00  0.00           H
ATOM    301  CG1 ILE X  19     122.820 129.656 177.118  1.00  0.00           C
ATOM    302 HG12 ILE X  19     121.800 129.615 177.502  1.00  0.00           H
ATOM    303 HG13 ILE X  19     123.322 130.606 177.299  1.00  0.00           H
ATOM    304  CD1 ILE X  19     122.677 129.732 175.539  1.00  0.00           C
ATOM    305 HD11 ILE X  19     122.172 128.802 175.278  1.00  0.00           H
ATOM    306 HD12 ILE X  19     123.619 129.703 174.993  1.00  0.00           H
ATOM    307 HD13 ILE X  19     122.064 130.563 175.188  1.00  0.00           H
ATOM    308  C   ILE X  19     124.259 127.561 179.994  1.00  0.00           C
ATOM    309  O   ILE X  19     123.455 127.115 180.879  1.00  0.00           O
ATOM    310  N   TRP X  20     125.495 126.966 179.841  1.00  0.00           N
ATOM    311  H   TRP X  20     126.121 127.414 179.188  1.00  0.00           H
ATOM    312  CA  TRP X  20     125.977 125.867 180.737  1.00  0.00           C
ATOM    313  HA  TRP X  20     125.415 124.937 180.650  1.00  0.00           H
ATOM    314  CB  TRP X  20     127.386 125.598 180.332  1.00  0.00           C
ATOM    315  HB2 TRP X  20     127.506 125.792 179.266  1.00  0.00           H
ATOM    316  HB3 TRP X  20     128.070 126.356 180.716  1.00  0.00           H
ATOM    317  CG  TRP X  20     127.874 124.240 180.762  1.00  0.00           C
ATOM    318  CD1 TRP X  20     128.513 124.022 181.945  1.00  0.00           C
ATOM    319  HD1 TRP X  20     128.780 124.809 182.634  1.00  0.00           H
ATOM    320  NE1 TRP X  20     128.884 122.690 182.024  1.00  0.00           N
ATOM    321  HE1 TRP X  20     129.458 122.291 182.753  1.00  0.00           H
ATOM    322  CE2 TRP X  20     128.275 121.940 181.001  1.00  0.00           C
ATOM    323  CZ2 TRP X  20     128.238 120.560 180.700  1.00  0.00           C
ATOM    324  HZ2 TRP X  20     128.880 119.801 181.122  1.00  0.00           H
ATOM    325  CH2 TRP X  20     127.444 120.155 179.607  1.00  0.00           C
ATOM    326  HH2 TRP X  20     127.462 119.129 179.270  1.00  0.00           H
ATOM    327  CZ3 TRP X  20     126.761 121.078 178.796  1.00  0.00           C
ATOM    328  HZ3 TRP X  20     126.311 120.749 177.871  1.00  0.00           H
ATOM    329  CE3 TRP X  20     126.891 122.477 179.019  1.00  0.00           C
ATOM    330  HE3 TRP X  20     126.355 123.124 178.341  1.00  0.00           H
ATOM    331  CD2 TRP X  20     127.585 122.909 180.194  1.00  0.00           C
ATOM    332  C   TRP X  20     125.947 126.207 182.231  1.00  0.00           C
ATOM    333  O   TRP X  20     125.660 125.385 183.080  1.00  0.00           O
ATOM    334  N   ARG X  21     126.405 127.410 182.613  1.00  0.00           N
ATOM    335  H   ARG X  21     126.667 128.035 181.865  1.00  0.00           H
ATOM    336  CA  ARG X  21     126.469 127.811 183.988  1.00  0.00           C
ATOM    337  HA  ARG X  21     126.933 127.029 184.591  1.00  0.00           H
ATOM    338  CB  ARG X  21     127.447 129.005 184.055  1.00  0.00           C
ATOM    339  HB2 ARG X  21     127.238 129.610 183.173  1.00  0.00           H
ATOM    340  HB3 ARG X  21     127.345 129.675 184.909  1.00  0.00           H
ATOM    341  CG  ARG X  21     128.912 128.575 183.812  1.00  0.00           C
ATOM    342  HG2 ARG X  21     129.282 128.104 184.723  1.00  0.00           H
ATOM    343  HG3 ARG X  21     128.979 127.816 183.032  1.00  0.00           H
ATOM    344  CD  ARG X  21     129.747 129.743 183.399  1.00  0.00           C
ATOM    345  HD2 ARG X  21     130.696 129.348 183.038  1.00  0.00           H
ATOM    346  HD3 ARG X  21     129.250 130.163 182.524  1.00  0.00           H
ATOM    347  NE  ARG X  21     129.912 130.745 184.451  1.00  0.00           N
ATOM    348  HE  ARG X  21     129.063 131.287 184.532  1.00  0.00           H
ATOM    349  CZ  ARG X  21     130.805 130.763 185.483  1.00  0.00           C
ATOM    350  NH1 ARG X  21     130.903 131.687 186.385  1.00  0.00           N
ATOM    351 HH11 ARG X  21     130.231 132.438 186.324  1.00  0.00           H
ATOM    352 HH12 ARG X  21     131.358 131.636 187.285  1.00  0.00           H
ATOM    353  NH2 ARG X  21     131.728 129.847 185.569  1.00  0.00           N
ATOM    354 HH21 ARG X  21     131.632 129.113 184.883  1.00  0.00           H
ATOM    355 HH22 ARG X  21     132.256 129.695 186.416  1.00  0.00           H
ATOM    356  C   ARG X  21     125.198 128.168 184.674  1.00  0.00           C
ATOM    357  O   ARG X  21     124.996 127.976 185.913  1.00  0.00           O
ATOM    358  N   GLN X  22     124.206 128.581 183.809  1.00  0.00           N
ATOM    359  H   GLN X  22     124.446 128.823 182.858  1.00  0.00           H
ATOM    360  CA  GLN X  22     122.773 128.591 184.085  1.00  0.00           C
ATOM    361  HA  GLN X  22     122.577 129.162 184.993  1.00  0.00           H
ATOM    362  CB  GLN X  22     122.051 129.462 182.977  1.00  0.00           C
ATOM    363  HB2 GLN X  22     122.472 130.466 183.033  1.00  0.00           H
ATOM    364  HB3 GLN X  22     122.317 129.239 181.944  1.00  0.00           H
ATOM    365  CG  GLN X  22     120.563 129.559 183.187  1.00  0.00           C
ATOM    366  HG2 GLN X  22     120.384 129.843 184.224  1.00  0.00           H
ATOM    367  HG3 GLN X  22     120.091 130.276 182.515  1.00  0.00           H
ATOM    368  CD  GLN X  22     119.825 128.344 182.718  1.00  0.00           C
ATOM    369  OE1 GLN X  22     120.162 127.670 181.770  1.00  0.00           O
ATOM    370  NE2 GLN X  22     118.716 127.942 183.321  1.00  0.00           N
ATOM    371 HE21 GLN X  22     118.269 127.105 182.973  1.00  0.00           H
ATOM    372 HE22 GLN X  22     118.182 128.594 183.877  1.00  0.00           H
ATOM    373  C   GLN X  22     122.254 127.246 184.350  1.00  0.00           C
ATOM    374  O   GLN X  22     121.560 126.989 185.300  1.00  0.00           O
ATOM    375  N   SER X  23     122.440 126.217 183.475  1.00  0.00           N
ATOM    376  H   SER X  23     122.922 126.558 182.654  1.00  0.00           H
ATOM    377  CA  SER X  23     121.923 124.853 183.562  1.00  0.00           C
ATOM    378  HA  SER X  23     120.838 124.754 183.593  1.00  0.00           H
ATOM    379  CB  SER X  23     122.338 124.134 182.338  1.00  0.00           C
ATOM    380  HB2 SER X  23     123.426 124.203 182.301  1.00  0.00           H
ATOM    381  HB3 SER X  23     121.978 123.138 182.593  1.00  0.00           H
ATOM    382  OG  SER X  23     121.738 124.620 181.146  1.00  0.00           O
ATOM    383  HG  SER X  23     121.890 125.565 181.075  1.00  0.00           H
ATOM    384  C   SER X  23     122.350 124.053 184.867  1.00  0.00           C
ATOM    385  O   SER X  23     121.530 123.505 185.596  1.00  0.00           O
ATOM    386  N   SER X  24     123.622 124.174 185.259  1.00  0.00           N
ATOM    387  H   SER X  24     124.220 124.746 184.680  1.00  0.00           H
ATOM    388  CA  SER X  24     124.096 123.931 186.622  1.00  0.00           C
ATOM    389  HA  SER X  24     124.003 122.894 186.945  1.00  0.00           H
ATOM    390  CB  SER X  24     125.621 124.187 186.526  1.00  0.00           C
ATOM    391  HB2 SER X  24     125.844 125.244 186.384  1.00  0.00           H
ATOM    392  HB3 SER X  24     126.076 123.870 187.465  1.00  0.00           H
ATOM    393  OG  SER X  24     126.244 123.396 185.513  1.00  0.00           O
ATOM    394  HG  SER X  24     127.013 123.946 185.344  1.00  0.00           H
ATOM    395  C   SER X  24     123.556 124.766 187.728  1.00  0.00           C
ATOM    396  O   SER X  24     123.665 124.330 188.907  1.00  0.00           O
ATOM    397  N   GLY X  25     122.890 125.906 187.558  1.00  0.00           N
ATOM    398  H   GLY X  25     122.774 126.350 186.659  1.00  0.00           H
ATOM    399  CA  GLY X  25     122.090 126.417 188.678  1.00  0.00           C
ATOM    400  HA2 GLY X  25     122.668 126.378 189.602  1.00  0.00           H
ATOM    401  HA3 GLY X  25     121.907 127.474 188.485  1.00  0.00           H
ATOM    402  C   GLY X  25     120.768 125.653 188.862  1.00  0.00           C
ATOM    403  O   GLY X  25     120.439 125.409 190.022  1.00  0.00           O
ATOM    404  N   ARG X  26     120.084 125.130 187.815  1.00  0.00           N
ATOM    405  H   ARG X  26     120.369 125.482 186.912  1.00  0.00           H
ATOM    406  CA  ARG X  26     118.911 124.244 188.045  1.00  0.00           C
ATOM    407  HA  ARG X  26     118.405 124.555 188.958  1.00  0.00           H
ATOM    408  CB  ARG X  26     117.953 124.273 186.790  1.00  0.00           C
ATOM    409  HB2 ARG X  26     118.486 123.863 185.932  1.00  0.00           H
ATOM    410  HB3 ARG X  26     117.094 123.660 187.065  1.00  0.00           H
ATOM    411  CG  ARG X  26     117.407 125.676 186.612  1.00  0.00           C
ATOM    412  HG2 ARG X  26     116.690 125.837 187.416  1.00  0.00           H
ATOM    413  HG3 ARG X  26     118.264 126.344 186.694  1.00  0.00           H
ATOM    414  CD  ARG X  26     116.680 125.858 185.309  1.00  0.00           C
ATOM    415  HD2 ARG X  26     117.253 125.528 184.442  1.00  0.00           H
ATOM    416  HD3 ARG X  26     115.860 125.140 185.339  1.00  0.00           H
ATOM    417  NE  ARG X  26     116.279 127.234 185.155  1.00  0.00           N
ATOM    418  HE  ARG X  26     116.986 127.926 185.360  1.00  0.00           H
ATOM    419  CZ  ARG X  26     115.160 127.664 184.564  1.00  0.00           C
ATOM    420  NH1 ARG X  26     114.306 126.824 183.994  1.00  0.00           N
ATOM    421 HH11 ARG X  26     114.493 125.855 184.207  1.00  0.00           H
ATOM    422 HH12 ARG X  26     113.361 127.132 183.811  1.00  0.00           H
ATOM    423  NH2 ARG X  26     114.783 128.890 184.430  1.00  0.00           N
ATOM    424 HH21 ARG X  26     115.445 129.652 184.459  1.00  0.00           H
ATOM    425 HH22 ARG X  26     113.915 129.085 183.950  1.00  0.00           H
ATOM    426  C   ARG X  26     119.255 122.714 188.285  1.00  0.00           C
ATOM    427  O   ARG X  26     118.333 121.896 188.448  1.00  0.00           O
ATOM    428  N   GLY X  27     120.550 122.365 188.293  1.00  0.00           N
ATOM    429  H   GLY X  27     121.171 123.140 188.111  1.00  0.00           H
ATOM    430  CA  GLY X  27     121.105 121.048 188.507  1.00  0.00           C
ATOM    431  HA2 GLY X  27     122.184 121.160 188.620  1.00  0.00           H
ATOM    432  HA3 GLY X  27     120.806 120.667 189.483  1.00  0.00           H
ATOM    433  C   GLY X  27     120.944 120.004 187.417  1.00  0.00           C
ATOM    434  O   GLY X  27     121.131 118.789 187.696  1.00  0.00           O
ATOM    435  N   LYS X  28     120.635 120.516 186.207  1.00  0.00           N
ATOM    436  H   LYS X  28     120.618 121.514 186.057  1.00  0.00           H
ATOM    437  CA  LYS X  28     120.367 119.642 185.059  1.00  0.00           C
ATOM    438  HA  LYS X  28     120.728 118.628 185.235  1.00  0.00           H
ATOM    439  CB  LYS X  28     118.841 119.608 184.840  1.00  0.00           C
ATOM    440  HB2 LYS X  28     118.504 118.800 184.192  1.00  0.00           H
ATOM    441  HB3 LYS X  28     118.387 119.362 185.801  1.00  0.00           H
ATOM    442  CG  LYS X  28     118.170 120.872 184.431  1.00  0.00           C
ATOM    443  HG2 LYS X  28     118.215 121.571 185.267  1.00  0.00           H
ATOM    444  HG3 LYS X  28     118.752 121.319 183.625  1.00  0.00           H
ATOM    445  CD  LYS X  28     116.738 120.606 184.155  1.00  0.00           C
ATOM    446  HD2 LYS X  28     116.609 119.649 183.650  1.00  0.00           H
ATOM    447  HD3 LYS X  28     116.151 120.539 185.071  1.00  0.00           H
ATOM    448  CE  LYS X  28     116.101 121.775 183.372  1.00  0.00           C
ATOM    449  HE2 LYS X  28     116.501 122.704 183.778  1.00  0.00           H
ATOM    450  HE3 LYS X  28     116.529 121.633 182.380  1.00  0.00           H
ATOM    451  NZ  LYS X  28     114.587 121.744 183.342  1.00  0.00           N
ATOM    452  HZ1 LYS X  28     114.257 122.478 182.731  1.00  0.00           H
ATOM    453  HZ2 LYS X  28     114.317 121.976 184.287  1.00  0.00           H
ATOM    454  HZ3 LYS X  28     114.230 120.837 183.078  1.00  0.00           H
ATOM    455  C   LYS X  28     121.129 120.087 183.743  1.00  0.00           C
ATOM    456  O   LYS X  28     122.066 120.867 183.915  1.00  0.00           O
ATOM    457  N   LEU X  29     120.623 119.614 182.605  1.00  0.00           N
ATOM    458  H   LEU X  29     120.095 118.754 182.578  1.00  0.00           H
ATOM    459  CA  LEU X  29     120.906 120.191 181.270  1.00  0.00           C
ATOM    460  HA  LEU X  29     121.345 121.165 181.488  1.00  0.00           H
ATOM    461  CB  LEU X  29     121.964 119.457 180.435  1.00  0.00           C
ATOM    462  HB2 LEU X  29     121.576 118.463 180.212  1.00  0.00           H
ATOM    463  HB3 LEU X  29     122.037 119.949 179.465  1.00  0.00           H
ATOM    464  CG  LEU X  29     123.380 119.300 181.123  1.00  0.00           C
ATOM    465  HG  LEU X  29     123.283 119.230 182.206  1.00  0.00           H
ATOM    466  CD1 LEU X  29     124.032 118.007 180.646  1.00  0.00           C
ATOM    467 HD11 LEU X  29     124.971 117.915 181.192  1.00  0.00           H
ATOM    468 HD12 LEU X  29     124.084 118.093 179.560  1.00  0.00           H
ATOM    469 HD13 LEU X  29     123.575 117.056 180.917  1.00  0.00           H
ATOM    470  CD2 LEU X  29     124.178 120.527 180.733  1.00  0.00           C
ATOM    471 HD21 LEU X  29     123.718 121.465 181.046  1.00  0.00           H
ATOM    472 HD22 LEU X  29     125.148 120.514 181.231  1.00  0.00           H
ATOM    473 HD23 LEU X  29     124.286 120.467 179.650  1.00  0.00           H
ATOM    474  C   LEU X  29     119.651 120.641 180.562  1.00  0.00           C
ATOM    475  O   LEU X  29     119.369 121.848 180.625  1.00  0.00           O
ATOM    476  N   PRO X  30     118.796 119.822 179.868  1.00  0.00           N
ATOM    477  CD  PRO X  30     117.763 120.374 178.983  1.00  0.00           C
ATOM    478  HD2 PRO X  30     118.031 121.306 178.484  1.00  0.00           H
ATOM    479  HD3 PRO X  30     116.851 120.687 179.492  1.00  0.00           H
ATOM    480  CG  PRO X  30     117.551 119.399 177.778  1.00  0.00           C
ATOM    481  HG2 PRO X  30     118.264 119.446 176.955  1.00  0.00           H
ATOM    482  HG3 PRO X  30     116.520 119.374 177.427  1.00  0.00           H
ATOM    483  CB  PRO X  30     117.857 118.098 178.575  1.00  0.00           C
ATOM    484  HB2 PRO X  30     118.164 117.341 177.854  1.00  0.00           H
ATOM    485  HB3 PRO X  30     116.947 117.604 178.916  1.00  0.00           H
ATOM    486  CA  PRO X  30     119.052 118.424 179.561  1.00  0.00           C
ATOM    487  HA  PRO X  30     120.011 118.303 179.058  1.00  0.00           H
ATOM    488  C   PRO X  30     118.973 117.456 180.669  1.00  0.00           C
ATOM    489  O   PRO X  30     118.549 117.875 181.789  1.00  0.00           O
ATOM    490  N   PRO X  31     119.313 116.213 180.433  1.00  0.00           N
ATOM    491  CD  PRO X  31     119.690 115.638 179.138  1.00  0.00           C
ATOM    492  HD2 PRO X  31     120.335 116.264 178.521  1.00  0.00           H
ATOM    493  HD3 PRO X  31     118.781 115.401 178.586  1.00  0.00           H
ATOM    494  CG  PRO X  31     120.415 114.344 179.481  1.00  0.00           C
ATOM    495  HG2 PRO X  31     121.474 114.552 179.630  1.00  0.00           H
ATOM    496  HG3 PRO X  31     120.331 113.598 178.690  1.00  0.00           H
ATOM    497  CB  PRO X  31     119.768 113.907 180.808  1.00  0.00           C
ATOM    498  HB2 PRO X  31     120.413 113.368 181.501  1.00  0.00           H
ATOM    499  HB3 PRO X  31     118.908 113.314 180.496  1.00  0.00           H
ATOM    500  CA  PRO X  31     119.212 115.170 181.511  1.00  0.00           C
ATOM    501  HA  PRO X  31     118.163 114.917 181.666  1.00  0.00           H
ATOM    502  C   PRO X  31     120.080 115.527 182.745  1.00  0.00           C
ATOM    503  O   PRO X  31     121.089 116.239 182.580  1.00  0.00           O
ATOM    504  N   GLY X  32     119.856 114.997 183.934  1.00  0.00           N
ATOM    505  H   GLY X  32     119.174 114.254 183.985  1.00  0.00           H
ATOM    506  CA  GLY X  32     120.656 115.264 185.182  1.00  0.00           C
ATOM    507  HA2 GLY X  32     121.107 116.257 185.199  1.00  0.00           H
ATOM    508  HA3 GLY X  32     119.858 115.227 185.922  1.00  0.00           H
ATOM    509  C   GLY X  32     121.727 114.245 185.469  1.00  0.00           C
ATOM    510  O   GLY X  32     121.877 113.315 184.661  1.00  0.00           O
ATOM    511  N   PRO X  33     122.514 114.334 186.537  1.00  0.00           N
ATOM    512  CD  PRO X  33     122.425 115.331 187.585  1.00  0.00           C
ATOM    513  HD2 PRO X  33     121.396 115.380 187.942  1.00  0.00           H
ATOM    514  HD3 PRO X  33     122.727 116.286 187.154  1.00  0.00           H
ATOM    515  CG  PRO X  33     123.397 114.884 188.680  1.00  0.00           C
ATOM    516  HG2 PRO X  33     122.979 114.099 189.310  1.00  0.00           H
ATOM    517  HG3 PRO X  33     123.787 115.687 189.306  1.00  0.00           H
ATOM    518  CB  PRO X  33     124.513 114.352 187.855  1.00  0.00           C
ATOM    519  HB2 PRO X  33     125.245 113.701 188.333  1.00  0.00           H
ATOM    520  HB3 PRO X  33     125.100 115.163 187.425  1.00  0.00           H
ATOM    521  CA  PRO X  33     123.710 113.551 186.816  1.00  0.00           C
ATOM    522  HA  PRO X  33     124.278 113.548 185.885  1.00  0.00           H
ATOM    523  C   PRO X  33     123.393 112.101 187.205  1.00  0.00           C
ATOM    524  O   PRO X  33     124.344 111.333 187.111  1.00  0.00           O
ATOM    525  N   THR X  34     122.129 111.803 187.602  1.00  0.00           N
ATOM    526  H   THR X  34     121.468 112.548 187.769  1.00  0.00           H
ATOM    527  CA  THR X  34     121.814 110.508 188.308  1.00  0.00           C
ATOM    528  HA  THR X  34     122.463 109.685 188.008  1.00  0.00           H
ATOM    529  CB  THR X  34     121.856 110.741 189.871  1.00  0.00           C
ATOM    530  HB  THR X  34     120.993 111.303 190.229  1.00  0.00           H
ATOM    531  CG2 THR X  34     122.071 109.389 190.544  1.00  0.00           C
ATOM    532 HG21 THR X  34     121.198 108.752 190.400  1.00  0.00           H
ATOM    533 HG22 THR X  34     122.117 109.585 191.615  1.00  0.00           H
ATOM    534 HG23 THR X  34     122.987 108.845 190.314  1.00  0.00           H
ATOM    535  OG1 THR X  34     122.906 111.533 190.238  1.00  0.00           O
ATOM    536  HG1 THR X  34     123.091 111.340 191.160  1.00  0.00           H
ATOM    537  C   THR X  34     120.379 110.067 187.803  1.00  0.00           C
ATOM    538  O   THR X  34     119.638 109.748 188.715  1.00  0.00           O
ATOM    539  N   PRO X  35     120.186 109.827 186.532  1.00  0.00           N
ATOM    540  CD  PRO X  35     118.841 109.354 186.071  1.00  0.00           C
ATOM    541  HD2 PRO X  35     118.222 110.250 186.038  1.00  0.00           H
ATOM    542  HD3 PRO X  35     118.409 108.610 186.742  1.00  0.00           H
ATOM    543  CG  PRO X  35     119.130 108.836 184.687  1.00  0.00           C
ATOM    544  HG2 PRO X  35     118.215 108.884 184.098  1.00  0.00           H
ATOM    545  HG3 PRO X  35     119.480 107.805 184.624  1.00  0.00           H
ATOM    546  CB  PRO X  35     120.066 109.825 184.176  1.00  0.00           C
ATOM    547  HB2 PRO X  35     119.639 110.758 183.808  1.00  0.00           H
ATOM    548  HB3 PRO X  35     120.529 109.454 183.261  1.00  0.00           H
ATOM    549  CA  PRO X  35     121.053 110.005 185.367  1.00  0.00           C
ATOM    550  HA  PRO X  35     121.420 111.022 185.230  1.00  0.00           H
ATOM    551  C   PRO X  35     122.306 109.072 185.215  1.00  0.00           C
ATOM    552  O   PRO X  35     122.468 108.144 185.981  1.00  0.00           O
ATOM    553  N   LEU X  36     123.021 109.340 184.076  1.00  0.00           N
ATOM    554  H   LEU X  36     122.790 110.221 183.639  1.00  0.00           H
ATOM    555  CA  LEU X  36     124.372 108.770 183.834  1.00  0.00           C
ATOM    556  HA  LEU X  36     124.629 108.019 184.581  1.00  0.00           H
ATOM    557  CB  LEU X  36     124.337 108.170 182.441  1.00  0.00           C
ATOM    558  HB2 LEU X  36     123.986 108.996 181.821  1.00  0.00           H
ATOM    559  HB3 LEU X  36     125.309 107.866 182.054  1.00  0.00           H
ATOM    560  CG  LEU X  36     123.459 106.979 182.257  1.00  0.00           C
ATOM    561  HG  LEU X  36     122.401 107.242 182.262  1.00  0.00           H
ATOM    562  CD1 LEU X  36     123.697 106.364 180.895  1.00  0.00           C
ATOM    563 HD11 LEU X  36     124.639 105.816 180.882  1.00  0.00           H
ATOM    564 HD12 LEU X  36     123.877 107.216 180.239  1.00  0.00           H
ATOM    565 HD13 LEU X  36     122.933 105.670 180.546  1.00  0.00           H
ATOM    566  CD2 LEU X  36     123.595 105.889 183.291  1.00  0.00           C
ATOM    567 HD21 LEU X  36     124.620 105.528 183.382  1.00  0.00           H
ATOM    568 HD22 LEU X  36     123.316 106.257 184.278  1.00  0.00           H
ATOM    569 HD23 LEU X  36     122.877 105.101 183.063  1.00  0.00           H
ATOM    570  C   LEU X  36     125.368 109.908 184.093  1.00  0.00           C
ATOM    571  O   LEU X  36     125.085 111.087 183.680  1.00  0.00           O
ATOM    572  N   PRO X  37     126.510 109.593 184.786  1.00  0.00           N
ATOM    573  CD  PRO X  37     126.872 108.324 185.318  1.00  0.00           C
ATOM    574  HD2 PRO X  37     126.862 107.519 184.583  1.00  0.00           H
ATOM    575  HD3 PRO X  37     126.141 108.043 186.076  1.00  0.00           H
ATOM    576  CG  PRO X  37     128.205 108.442 185.939  1.00  0.00           C
ATOM    577  HG2 PRO X  37     128.910 108.071 185.195  1.00  0.00           H
ATOM    578  HG3 PRO X  37     128.343 107.734 186.757  1.00  0.00           H
ATOM    579  CB  PRO X  37     128.279 109.970 186.232  1.00  0.00           C
ATOM    580  HB2 PRO X  37     129.256 110.440 186.343  1.00  0.00           H
ATOM    581  HB3 PRO X  37     127.753 110.065 187.182  1.00  0.00           H
ATOM    582  CA  PRO X  37     127.440 110.618 185.124  1.00  0.00           C
ATOM    583  HA  PRO X  37     126.821 111.378 185.601  1.00  0.00           H
ATOM    584  C   PRO X  37     128.242 111.062 183.916  1.00  0.00           C
ATOM    585  O   PRO X  37     129.299 110.521 183.616  1.00  0.00           O
ATOM    586  N   VAL X  38     127.746 112.092 183.232  1.00  0.00           N
ATOM    587  H   VAL X  38     126.857 112.506 183.469  1.00  0.00           H
ATOM    588  CA  VAL X  38     128.420 112.691 181.985  1.00  0.00           C
ATOM    589  HA  VAL X  38     128.487 111.915 181.223  1.00  0.00           H
ATOM    590  CB  VAL X  38     127.480 113.771 181.409  1.00  0.00           C
ATOM    591  HB  VAL X  38     127.696 114.689 181.956  1.00  0.00           H
ATOM    592  CG1 VAL X  38     127.783 114.052 179.859  1.00  0.00           C
ATOM    593 HG11 VAL X  38     127.415 115.025 179.536  1.00  0.00           H
ATOM    594 HG12 VAL X  38     128.854 114.152 179.683  1.00  0.00           H
ATOM    595 HG13 VAL X  38     127.277 113.258 179.309  1.00  0.00           H
ATOM    596  CG2 VAL X  38     125.971 113.429 181.519  1.00  0.00           C
ATOM    597 HG21 VAL X  38     125.575 113.718 182.493  1.00  0.00           H
ATOM    598 HG22 VAL X  38     125.948 112.341 181.473  1.00  0.00           H
ATOM    599 HG23 VAL X  38     125.452 113.932 180.703  1.00  0.00           H
ATOM    600  C   VAL X  38     129.846 113.281 182.242  1.00  0.00           C
ATOM    601  O   VAL X  38     129.922 114.349 182.874  1.00  0.00           O
ATOM    602  N   ILE X  39     130.844 112.597 181.745  1.00  0.00           N
ATOM    603  H   ILE X  39     130.643 111.936 181.008  1.00  0.00           H
ATOM    604  CA  ILE X  39     132.215 112.786 182.059  1.00  0.00           C
ATOM    605  HA  ILE X  39     132.743 111.931 181.637  1.00  0.00           H
ATOM    606  CB  ILE X  39     132.949 113.937 181.320  1.00  0.00           C
ATOM    607  HB  ILE X  39     132.566 114.930 181.556  1.00  0.00           H
ATOM    608  CG2 ILE X  39     134.537 113.932 181.393  1.00  0.00           C
ATOM    609 HG21 ILE X  39     134.732 112.970 180.919  1.00  0.00           H
ATOM    610 HG22 ILE X  39     134.865 113.897 182.432  1.00  0.00           H
ATOM    611 HG23 ILE X  39     134.989 114.741 180.819  1.00  0.00           H
ATOM    612  CG1 ILE X  39     132.594 113.835 179.827  1.00  0.00           C
ATOM    613 HG12 ILE X  39     133.301 113.147 179.362  1.00  0.00           H
ATOM    614 HG13 ILE X  39     131.548 113.580 179.654  1.00  0.00           H
ATOM    615  CD1 ILE X  39     132.719 115.135 179.022  1.00  0.00           C
ATOM    616 HD11 ILE X  39     132.460 114.972 177.976  1.00  0.00           H
ATOM    617 HD12 ILE X  39     133.749 115.473 179.144  1.00  0.00           H
ATOM    618 HD13 ILE X  39     132.028 115.840 179.484  1.00  0.00           H
ATOM    619  C   ILE X  39     132.488 112.927 183.586  1.00  0.00           C
ATOM    620  O   ILE X  39     132.954 113.943 184.076  1.00  0.00           O
ATOM    621  N   GLY X  40     132.040 112.019 184.380  1.00  0.00           N
ATOM    622  H   GLY X  40     131.403 111.295 184.079  1.00  0.00           H
ATOM    623  CA  GLY X  40     131.994 112.053 185.836  1.00  0.00           C
ATOM    624  HA2 GLY X  40     131.642 111.069 186.146  1.00  0.00           H
ATOM    625  HA3 GLY X  40     133.052 112.093 186.094  1.00  0.00           H
ATOM    626  C   GLY X  40     131.273 113.236 186.490  1.00  0.00           C
ATOM    627  O   GLY X  40     131.599 113.554 187.619  1.00  0.00           O
ATOM    628  N   ASN X  41     130.543 114.029 185.716  1.00  0.00           N
ATOM    629  H   ASN X  41     130.457 113.759 184.747  1.00  0.00           H
ATOM    630  CA  ASN X  41     129.937 115.275 186.150  1.00  0.00           C
ATOM    631  HA  ASN X  41     129.375 115.622 185.282  1.00  0.00           H
ATOM    632  CB  ASN X  41     128.916 115.103 187.377  1.00  0.00           C
ATOM    633  HB2 ASN X  41     129.622 115.111 188.208  1.00  0.00           H
ATOM    634  HB3 ASN X  41     128.333 116.024 187.373  1.00  0.00           H
ATOM    635  CG  ASN X  41     128.116 113.943 187.387  1.00  0.00           C
ATOM    636  OD1 ASN X  41     127.484 113.490 186.398  1.00  0.00           O
ATOM    637  ND2 ASN X  41     128.124 113.168 188.393  1.00  0.00           N
ATOM    638 HD21 ASN X  41     128.783 113.353 189.136  1.00  0.00           H
ATOM    639 HD22 ASN X  41     127.512 112.365 188.409  1.00  0.00           H
ATOM    640  C   ASN X  41     130.952 116.443 186.388  1.00  0.00           C
ATOM    641  O   ASN X  41     130.563 117.443 186.975  1.00  0.00           O
ATOM    642  N   ILE X  42     132.211 116.321 185.995  1.00  0.00           N
ATOM    643  H   ILE X  42     132.408 115.462 185.502  1.00  0.00           H
ATOM    644  CA  ILE X  42     133.390 117.170 186.346  1.00  0.00           C
ATOM    645  HA  ILE X  42     133.357 117.179 187.435  1.00  0.00           H
ATOM    646  CB  ILE X  42     134.744 116.544 185.789  1.00  0.00           C
ATOM    647  HB  ILE X  42     134.486 115.497 185.947  1.00  0.00           H
ATOM    648  CG2 ILE X  42     134.905 116.695 184.245  1.00  0.00           C
ATOM    649 HG21 ILE X  42     135.076 117.746 184.014  1.00  0.00           H
ATOM    650 HG22 ILE X  42     134.082 116.301 183.649  1.00  0.00           H
ATOM    651 HG23 ILE X  42     135.782 116.094 184.003  1.00  0.00           H
ATOM    652  CG1 ILE X  42     136.053 116.933 186.587  1.00  0.00           C
ATOM    653 HG12 ILE X  42     136.573 117.798 186.174  1.00  0.00           H
ATOM    654 HG13 ILE X  42     135.990 117.041 187.670  1.00  0.00           H
ATOM    655  CD1 ILE X  42     137.059 115.822 186.496  1.00  0.00           C
ATOM    656 HD11 ILE X  42     137.837 115.762 187.257  1.00  0.00           H
ATOM    657 HD12 ILE X  42     137.494 115.868 185.498  1.00  0.00           H
ATOM    658 HD13 ILE X  42     136.558 114.872 186.682  1.00  0.00           H
ATOM    659  C   ILE X  42     133.344 118.627 185.827  1.00  0.00           C
ATOM    660  O   ILE X  42     134.225 119.416 186.201  1.00  0.00           O
ATOM    661  N   LEU X  43     132.415 118.953 184.943  1.00  0.00           N
ATOM    662  H   LEU X  43     131.590 118.371 184.894  1.00  0.00           H
ATOM    663  CA  LEU X  43     132.151 120.251 184.434  1.00  0.00           C
ATOM    664  HA  LEU X  43     133.080 120.793 184.613  1.00  0.00           H
ATOM    665  CB  LEU X  43     131.875 120.130 182.919  1.00  0.00           C
ATOM    666  HB2 LEU X  43     130.897 119.676 182.757  1.00  0.00           H
ATOM    667  HB3 LEU X  43     131.863 121.159 182.561  1.00  0.00           H
ATOM    668  CG  LEU X  43     132.971 119.476 182.031  1.00  0.00           C
ATOM    669  HG  LEU X  43     133.278 118.589 182.586  1.00  0.00           H
ATOM    670  CD1 LEU X  43     132.454 118.999 180.700  1.00  0.00           C
ATOM    671 HD11 LEU X  43     133.157 118.310 180.232  1.00  0.00           H
ATOM    672 HD12 LEU X  43     132.376 119.912 180.109  1.00  0.00           H
ATOM    673 HD13 LEU X  43     131.559 118.377 180.702  1.00  0.00           H
ATOM    674  CD2 LEU X  43     134.149 120.407 181.811  1.00  0.00           C
ATOM    675 HD21 LEU X  43     135.045 119.881 181.481  1.00  0.00           H
ATOM    676 HD22 LEU X  43     133.900 121.109 181.015  1.00  0.00           H
ATOM    677 HD23 LEU X  43     134.322 120.938 182.747  1.00  0.00           H
ATOM    678  C   LEU X  43     130.863 120.942 185.095  1.00  0.00           C
ATOM    679  O   LEU X  43     130.385 121.868 184.554  1.00  0.00           O
ATOM    680  N   GLN X  44     130.302 120.256 186.137  1.00  0.00           N
ATOM    681  H   GLN X  44     130.724 119.398 186.462  1.00  0.00           H
ATOM    682  CA  GLN X  44     129.086 120.756 186.782  1.00  0.00           C
ATOM    683  HA  GLN X  44     128.843 121.792 186.549  1.00  0.00           H
ATOM    684  CB  GLN X  44     127.846 120.071 186.232  1.00  0.00           C
ATOM    685  HB2 GLN X  44     128.029 119.001 186.332  1.00  0.00           H
ATOM    686  HB3 GLN X  44     126.981 120.456 186.773  1.00  0.00           H
ATOM    687  CG  GLN X  44     127.477 120.371 184.706  1.00  0.00           C
ATOM    688  HG2 GLN X  44     127.736 121.384 184.400  1.00  0.00           H
ATOM    689  HG3 GLN X  44     128.249 119.851 184.139  1.00  0.00           H
ATOM    690  CD  GLN X  44     126.068 120.058 184.247  1.00  0.00           C
ATOM    691  OE1 GLN X  44     125.927 118.993 183.774  1.00  0.00           O
ATOM    692  NE2 GLN X  44     125.071 120.976 184.459  1.00  0.00           N
ATOM    693 HE21 GLN X  44     124.127 120.816 184.136  1.00  0.00           H
ATOM    694 HE22 GLN X  44     125.278 121.907 184.791  1.00  0.00           H
ATOM    695  C   GLN X  44     129.017 120.579 188.330  1.00  0.00           C
ATOM    696  O   GLN X  44     128.162 121.118 188.983  1.00  0.00           O
ATOM    697  N   ILE X  45     129.897 119.728 188.890  1.00  0.00           N
ATOM    698  H   ILE X  45     130.483 119.190 188.268  1.00  0.00           H
ATOM    699  CA  ILE X  45     129.880 119.258 190.270  1.00  0.00           C
ATOM    700  HA  ILE X  45     129.310 120.048 190.759  1.00  0.00           H
ATOM    701  CB  ILE X  45     129.289 117.848 190.212  1.00  0.00           C
ATOM    702  HB  ILE X  45     129.804 117.229 189.477  1.00  0.00           H
ATOM    703  CG2 ILE X  45     129.369 117.148 191.574  1.00  0.00           C
ATOM    704 HG21 ILE X  45     128.928 117.780 192.345  1.00  0.00           H
ATOM    705 HG22 ILE X  45     130.421 117.072 191.848  1.00  0.00           H
ATOM    706 HG23 ILE X  45     129.044 116.113 191.466  1.00  0.00           H
ATOM    707  CG1 ILE X  45     127.796 117.948 189.853  1.00  0.00           C
ATOM    708 HG12 ILE X  45     127.434 118.808 190.417  1.00  0.00           H
ATOM    709 HG13 ILE X  45     127.795 118.268 188.811  1.00  0.00           H
ATOM    710  CD1 ILE X  45     126.868 116.702 190.042  1.00  0.00           C
ATOM    711 HD11 ILE X  45     125.890 116.697 189.560  1.00  0.00           H
ATOM    712 HD12 ILE X  45     126.718 116.391 191.075  1.00  0.00           H
ATOM    713 HD13 ILE X  45     127.465 115.881 189.643  1.00  0.00           H
ATOM    714  C   ILE X  45     131.264 119.183 190.870  1.00  0.00           C
ATOM    715  O   ILE X  45     132.215 118.808 190.174  1.00  0.00           O
ATOM    716  N   ASP X  46     131.378 119.487 192.131  1.00  0.00           N
ATOM    717  H   ASP X  46     130.523 119.861 192.517  1.00  0.00           H
ATOM    718  CA  ASP X  46     132.552 119.583 193.005  1.00  0.00           C
ATOM    719  HA  ASP X  46     133.300 118.893 192.613  1.00  0.00           H
ATOM    720  CB  ASP X  46     133.031 121.081 192.965  1.00  0.00           C
ATOM    721  HB2 ASP X  46     133.213 121.297 191.912  1.00  0.00           H
ATOM    722  HB3 ASP X  46     132.154 121.675 193.221  1.00  0.00           H
ATOM    723  CG  ASP X  46     134.207 121.421 193.934  1.00  0.00           C
ATOM    724  OD1 ASP X  46     134.789 120.514 194.556  1.00  0.00           O
ATOM    725  OD2 ASP X  46     134.497 122.601 194.123  1.00  0.00           O
ATOM    726  C   ASP X  46     132.226 119.005 194.400  1.00  0.00           C
ATOM    727  O   ASP X  46     131.138 119.278 194.924  1.00  0.00           O
ATOM    728  N   ILE X  47     133.219 118.366 194.960  1.00  0.00           N
ATOM    729  H   ILE X  47     134.118 118.566 194.546  1.00  0.00           H
ATOM    730  CA  ILE X  47     133.110 117.858 196.354  1.00  0.00           C
ATOM    731  HA  ILE X  47     132.092 117.470 196.320  1.00  0.00           H
ATOM    732  CB  ILE X  47     134.175 116.723 196.608  1.00  0.00           C
ATOM    733  HB  ILE X  47     134.074 116.095 195.722  1.00  0.00           H
ATOM    734  CG2 ILE X  47     135.607 117.219 196.662  1.00  0.00           C
ATOM    735 HG21 ILE X  47     136.424 116.558 196.372  1.00  0.00           H
ATOM    736 HG22 ILE X  47     135.695 117.663 197.654  1.00  0.00           H
ATOM    737 HG23 ILE X  47     135.708 118.009 195.918  1.00  0.00           H
ATOM    738  CG1 ILE X  47     133.765 115.829 197.806  1.00  0.00           C
ATOM    739 HG12 ILE X  47     134.117 116.243 198.751  1.00  0.00           H
ATOM    740 HG13 ILE X  47     132.678 115.773 197.763  1.00  0.00           H
ATOM    741  CD1 ILE X  47     134.198 114.376 197.642  1.00  0.00           C
ATOM    742 HD11 ILE X  47     133.863 113.843 196.752  1.00  0.00           H
ATOM    743 HD12 ILE X  47     134.049 113.773 198.537  1.00  0.00           H
ATOM    744 HD13 ILE X  47     135.262 114.397 197.408  1.00  0.00           H
ATOM    745  C   ILE X  47     133.126 118.980 197.458  1.00  0.00           C
ATOM    746  O   ILE X  47     132.533 118.816 198.528  1.00  0.00           O
ATOM    747  N   LYS X  48     133.766 120.067 197.075  1.00  0.00           N
ATOM    748  H   LYS X  48     134.104 120.107 196.124  1.00  0.00           H
ATOM    749  CA  LYS X  48     134.052 121.183 197.956  1.00  0.00           C
ATOM    750  HA  LYS X  48     134.215 120.801 198.964  1.00  0.00           H
ATOM    751  CB  LYS X  48     135.320 121.979 197.554  1.00  0.00           C
ATOM    752  HB2 LYS X  48     135.266 122.517 196.608  1.00  0.00           H
ATOM    753  HB3 LYS X  48     135.488 122.638 198.406  1.00  0.00           H
ATOM    754  CG  LYS X  48     136.545 120.977 197.429  1.00  0.00           C
ATOM    755  HG2 LYS X  48     136.706 120.537 198.413  1.00  0.00           H
ATOM    756  HG3 LYS X  48     136.404 120.372 196.533  1.00  0.00           H
ATOM    757  CD  LYS X  48     137.836 121.842 197.146  1.00  0.00           C
ATOM    758  HD2 LYS X  48     138.296 122.288 198.028  1.00  0.00           H
ATOM    759  HD3 LYS X  48     138.637 121.229 196.734  1.00  0.00           H
ATOM    760  CE  LYS X  48     137.661 122.977 196.096  1.00  0.00           C
ATOM    761  HE2 LYS X  48     136.963 123.744 196.433  1.00  0.00           H
ATOM    762  HE3 LYS X  48     138.614 123.467 195.897  1.00  0.00           H
ATOM    763  NZ  LYS X  48     137.130 122.409 194.819  1.00  0.00           N
ATOM    764  HZ1 LYS X  48     137.431 122.995 194.054  1.00  0.00           H
ATOM    765  HZ2 LYS X  48     136.129 122.277 194.797  1.00  0.00           H
ATOM    766  HZ3 LYS X  48     137.546 121.530 194.547  1.00  0.00           H
ATOM    767  C   LYS X  48     132.874 122.177 197.975  1.00  0.00           C
ATOM    768  O   LYS X  48     132.284 122.419 199.062  1.00  0.00           O
ATOM    769  N   ASP X  49     132.572 122.724 196.821  1.00  0.00           N
ATOM    770  H   ASP X  49     133.210 122.606 196.047  1.00  0.00           H
ATOM    771  CA  ASP X  49     131.400 123.610 196.567  1.00  0.00           C
ATOM    772  HA  ASP X  49     131.227 124.072 197.539  1.00  0.00           H
ATOM    773  CB  ASP X  49     131.824 124.676 195.574  1.00  0.00           C
ATOM    774  HB2 ASP X  49     132.853 125.013 195.695  1.00  0.00           H
ATOM    775  HB3 ASP X  49     131.902 124.172 194.611  1.00  0.00           H
ATOM    776  CG  ASP X  49     130.910 125.869 195.603  1.00  0.00           C
ATOM    777  OD1 ASP X  49     130.315 126.250 196.646  1.00  0.00           O
ATOM    778  OD2 ASP X  49     130.848 126.422 194.470  1.00  0.00           O
ATOM    779  C   ASP X  49     130.043 122.879 196.253  1.00  0.00           C
ATOM    780  O   ASP X  49     129.180 123.285 195.438  1.00  0.00           O
ATOM    781  N   VAL X  50     129.826 121.749 196.917  1.00  0.00           N
ATOM    782  H   VAL X  50     130.645 121.426 197.412  1.00  0.00           H
ATOM    783  CA  VAL X  50     128.729 120.761 196.708  1.00  0.00           C
ATOM    784  HA  VAL X  50     128.659 120.460 195.663  1.00  0.00           H
ATOM    785  CB  VAL X  50     129.054 119.516 197.532  1.00  0.00           C
ATOM    786  HB  VAL X  50     130.077 119.188 197.347  1.00  0.00           H
ATOM    787  CG1 VAL X  50     128.686 119.715 199.021  1.00  0.00           C
ATOM    788 HG11 VAL X  50     128.813 118.814 199.621  1.00  0.00           H
ATOM    789 HG12 VAL X  50     129.289 120.543 199.394  1.00  0.00           H
ATOM    790 HG13 VAL X  50     127.617 119.842 199.189  1.00  0.00           H
ATOM    791  CG2 VAL X  50     128.311 118.337 196.999  1.00  0.00           C
ATOM    792 HG21 VAL X  50     128.381 118.208 195.919  1.00  0.00           H
ATOM    793 HG22 VAL X  50     127.254 118.457 197.238  1.00  0.00           H
ATOM    794 HG23 VAL X  50     128.602 117.500 197.633  1.00  0.00           H
ATOM    795  C   VAL X  50     127.339 121.371 196.996  1.00  0.00           C
ATOM    796  O   VAL X  50     126.414 120.991 196.288  1.00  0.00           O
ATOM    797  N   SER X  51     127.204 122.260 197.957  1.00  0.00           N
ATOM    798  H   SER X  51     127.997 122.585 198.492  1.00  0.00           H
ATOM    799  CA  SER X  51     125.943 122.576 198.560  1.00  0.00           C
ATOM    800  HA  SER X  51     125.612 121.641 199.012  1.00  0.00           H
ATOM    801  CB  SER X  51     126.218 123.547 199.739  1.00  0.00           C
ATOM    802  HB2 SER X  51     126.994 123.222 200.432  1.00  0.00           H
ATOM    803  HB3 SER X  51     126.463 124.510 199.290  1.00  0.00           H
ATOM    804  OG  SER X  51     124.960 123.645 200.524  1.00  0.00           O
ATOM    805  HG  SER X  51     124.438 124.289 200.040  1.00  0.00           H
ATOM    806  C   SER X  51     125.078 123.362 197.575  1.00  0.00           C
ATOM    807  O   SER X  51     123.870 123.209 197.722  1.00  0.00           O
ATOM    808  N   LYS X  52     125.577 124.119 196.666  1.00  0.00           N
ATOM    809  H   LYS X  52     126.576 124.265 196.652  1.00  0.00           H
ATOM    810  CA  LYS X  52     124.806 124.794 195.560  1.00  0.00           C
ATOM    811  HA  LYS X  52     123.947 125.280 196.022  1.00  0.00           H
ATOM    812  CB  LYS X  52     125.696 125.743 194.746  1.00  0.00           C
ATOM    813  HB2 LYS X  52     126.721 125.375 194.774  1.00  0.00           H
ATOM    814  HB3 LYS X  52     125.279 125.688 193.740  1.00  0.00           H
ATOM    815  CG  LYS X  52     125.643 127.177 195.318  1.00  0.00           C
ATOM    816  HG2 LYS X  52     124.589 127.441 195.392  1.00  0.00           H
ATOM    817  HG3 LYS X  52     125.924 126.968 196.350  1.00  0.00           H
ATOM    818  CD  LYS X  52     126.529 128.138 194.522  1.00  0.00           C
ATOM    819  HD2 LYS X  52     127.501 127.658 194.404  1.00  0.00           H
ATOM    820  HD3 LYS X  52     126.111 128.310 193.531  1.00  0.00           H
ATOM    821  CE  LYS X  52     126.715 129.441 195.416  1.00  0.00           C
ATOM    822  HE2 LYS X  52     125.770 129.982 195.375  1.00  0.00           H
ATOM    823  HE3 LYS X  52     126.924 129.163 196.449  1.00  0.00           H
ATOM    824  NZ  LYS X  52     127.783 130.304 194.874  1.00  0.00           N
ATOM    825  HZ1 LYS X  52     127.635 131.287 195.056  1.00  0.00           H
ATOM    826  HZ2 LYS X  52     127.672 130.192 193.876  1.00  0.00           H
ATOM    827  HZ3 LYS X  52     128.670 130.041 195.278  1.00  0.00           H
ATOM    828  C   LYS X  52     124.223 123.770 194.627  1.00  0.00           C
ATOM    829  O   LYS X  52     123.067 123.872 194.210  1.00  0.00           O
ATOM    830  N   SER X  53     124.882 122.643 194.465  1.00  0.00           N
ATOM    831  H   SER X  53     125.752 122.616 194.977  1.00  0.00           H
ATOM    832  CA  SER X  53     124.403 121.455 193.758  1.00  0.00           C
ATOM    833  HA  SER X  53     123.952 121.853 192.849  1.00  0.00           H
ATOM    834  CB  SER X  53     125.508 120.452 193.271  1.00  0.00           C
ATOM    835  HB2 SER X  53     126.006 120.004 194.130  1.00  0.00           H
ATOM    836  HB3 SER X  53     124.999 119.659 192.722  1.00  0.00           H
ATOM    837  OG  SER X  53     126.508 121.169 192.597  1.00  0.00           O
ATOM    838  HG  SER X  53     126.267 121.056 191.675  1.00  0.00           H
ATOM    839  C   SER X  53     123.220 120.795 194.486  1.00  0.00           C
ATOM    840  O   SER X  53     122.065 120.701 194.023  1.00  0.00           O
ATOM    841  N   LEU X  54     123.529 120.362 195.725  1.00  0.00           N
ATOM    842  H   LEU X  54     124.456 120.642 196.014  1.00  0.00           H
ATOM    843  CA  LEU X  54     122.731 119.477 196.599  1.00  0.00           C
ATOM    844  HA  LEU X  54     122.541 118.584 196.004  1.00  0.00           H
ATOM    845  CB  LEU X  54     123.632 119.141 197.802  1.00  0.00           C
ATOM    846  HB2 LEU X  54     124.482 118.610 197.372  1.00  0.00           H
ATOM    847  HB3 LEU X  54     123.909 120.139 198.141  1.00  0.00           H
ATOM    848  CG  LEU X  54     122.927 118.245 198.901  1.00  0.00           C
ATOM    849  HG  LEU X  54     122.201 118.873 199.417  1.00  0.00           H
ATOM    850  CD1 LEU X  54     122.195 116.938 198.418  1.00  0.00           C
ATOM    851 HD11 LEU X  54     122.769 116.324 197.724  1.00  0.00           H
ATOM    852 HD12 LEU X  54     121.194 117.202 198.078  1.00  0.00           H
ATOM    853 HD13 LEU X  54     122.018 116.247 199.243  1.00  0.00           H
ATOM    854  CD2 LEU X  54     123.868 117.905 200.016  1.00  0.00           C
ATOM    855 HD21 LEU X  54     124.681 117.229 199.748  1.00  0.00           H
ATOM    856 HD22 LEU X  54     124.257 118.839 200.422  1.00  0.00           H
ATOM    857 HD23 LEU X  54     123.220 117.547 200.816  1.00  0.00           H
ATOM    858  C   LEU X  54     121.388 120.065 196.939  1.00  0.00           C
ATOM    859  O   LEU X  54     120.407 119.387 196.609  1.00  0.00           O
ATOM    860  N   THR X  55     121.321 121.281 197.385  1.00  0.00           N
ATOM    861  H   THR X  55     122.153 121.843 197.491  1.00  0.00           H
ATOM    862  CA  THR X  55     120.026 122.065 197.632  1.00  0.00           C
ATOM    863  HA  THR X  55     119.409 121.676 198.442  1.00  0.00           H
ATOM    864  CB  THR X  55     120.346 123.495 198.049  1.00  0.00           C
ATOM    865  HB  THR X  55     119.451 124.082 197.844  1.00  0.00           H
ATOM    866  CG2 THR X  55     120.790 123.833 199.467  1.00  0.00           C
ATOM    867 HG21 THR X  55     120.054 123.578 200.230  1.00  0.00           H
ATOM    868 HG22 THR X  55     120.891 124.915 199.553  1.00  0.00           H
ATOM    869 HG23 THR X  55     121.684 123.233 199.638  1.00  0.00           H
ATOM    870  OG1 THR X  55     121.320 124.073 197.232  1.00  0.00           O
ATOM    871  HG1 THR X  55     122.180 123.754 197.513  1.00  0.00           H
ATOM    872  C   THR X  55     119.034 122.157 196.413  1.00  0.00           C
ATOM    873  O   THR X  55     117.809 122.369 196.561  1.00  0.00           O
ATOM    874  N   ASN X  56     119.620 122.092 195.196  1.00  0.00           N
ATOM    875  H   ASN X  56     120.613 121.938 195.100  1.00  0.00           H
ATOM    876  CA  ASN X  56     118.779 122.150 193.903  1.00  0.00           C
ATOM    877  HA  ASN X  56     117.861 122.706 194.096  1.00  0.00           H
ATOM    878  CB  ASN X  56     119.713 122.943 192.941  1.00  0.00           C
ATOM    879  HB2 ASN X  56     120.749 122.608 192.987  1.00  0.00           H
ATOM    880  HB3 ASN X  56     119.486 122.773 191.889  1.00  0.00           H
ATOM    881  CG  ASN X  56     119.650 124.423 193.038  1.00  0.00           C
ATOM    882  OD1 ASN X  56     118.658 125.007 192.607  1.00  0.00           O
ATOM    883  ND2 ASN X  56     120.607 125.136 193.562  1.00  0.00           N
ATOM    884 HD21 ASN X  56     121.445 124.743 193.967  1.00  0.00           H
ATOM    885 HD22 ASN X  56     120.402 126.121 193.653  1.00  0.00           H
ATOM    886  C   ASN X  56     118.473 120.689 193.351  1.00  0.00           C
ATOM    887  O   ASN X  56     117.403 120.489 192.766  1.00  0.00           O
ATOM    888  N   LEU X  57     119.377 119.753 193.505  1.00  0.00           N
ATOM    889  H   LEU X  57     120.270 120.007 193.903  1.00  0.00           H
ATOM    890  CA  LEU X  57     119.243 118.371 193.190  1.00  0.00           C
ATOM    891  HA  LEU X  57     118.845 118.157 192.198  1.00  0.00           H
ATOM    892  CB  LEU X  57     120.633 117.742 193.234  1.00  0.00           C
ATOM    893  HB2 LEU X  57     121.233 118.004 194.105  1.00  0.00           H
ATOM    894  HB3 LEU X  57     120.588 116.661 193.370  1.00  0.00           H
ATOM    895  CG  LEU X  57     121.470 118.057 191.984  1.00  0.00           C
ATOM    896  HG  LEU X  57     121.524 119.129 191.796  1.00  0.00           H
ATOM    897  CD1 LEU X  57     122.886 117.593 192.323  1.00  0.00           C
ATOM    898 HD11 LEU X  57     123.619 117.789 191.541  1.00  0.00           H
ATOM    899 HD12 LEU X  57     122.792 116.513 192.442  1.00  0.00           H
ATOM    900 HD13 LEU X  57     123.236 118.130 193.204  1.00  0.00           H
ATOM    901  CD2 LEU X  57     121.084 117.380 190.635  1.00  0.00           C
ATOM    902 HD21 LEU X  57     121.793 117.497 189.816  1.00  0.00           H
ATOM    903 HD22 LEU X  57     120.962 116.326 190.882  1.00  0.00           H
ATOM    904 HD23 LEU X  57     120.147 117.722 190.194  1.00  0.00           H
ATOM    905  C   LEU X  57     118.223 117.730 194.180  1.00  0.00           C
ATOM    906  O   LEU X  57     117.398 116.949 193.703  1.00  0.00           O
ATOM    907  N   SER X  58     118.165 118.073 195.503  1.00  0.00           N
ATOM    908  H   SER X  58     118.883 118.725 195.782  1.00  0.00           H
ATOM    909  CA  SER X  58     117.204 117.557 196.482  1.00  0.00           C
ATOM    910  HA  SER X  58     117.252 116.469 196.530  1.00  0.00           H
ATOM    911  CB  SER X  58     117.460 118.049 197.892  1.00  0.00           C
ATOM    912  HB2 SER X  58     116.609 117.886 198.553  1.00  0.00           H
ATOM    913  HB3 SER X  58     118.280 117.457 198.300  1.00  0.00           H
ATOM    914  OG  SER X  58     117.669 119.423 198.040  1.00  0.00           O
ATOM    915  HG  SER X  58     118.369 119.503 198.692  1.00  0.00           H
ATOM    916  C   SER X  58     115.785 117.849 196.149  1.00  0.00           C
ATOM    917  O   SER X  58     114.862 117.124 196.494  1.00  0.00           O
ATOM    918  N   LYS X  59     115.559 118.872 195.321  1.00  0.00           N
ATOM    919  H   LYS X  59     116.335 119.344 194.878  1.00  0.00           H
ATOM    920  CA  LYS X  59     114.221 119.267 194.872  1.00  0.00           C
ATOM    921  HA  LYS X  59     113.576 119.334 195.748  1.00  0.00           H
ATOM    922  CB  LYS X  59     114.258 120.644 194.115  1.00  0.00           C
ATOM    923  HB2 LYS X  59     114.544 121.506 194.717  1.00  0.00           H
ATOM    924  HB3 LYS X  59     114.987 120.629 193.306  1.00  0.00           H
ATOM    925  CG  LYS X  59     112.889 121.032 193.538  1.00  0.00           C
ATOM    926  HG2 LYS X  59     112.755 120.495 192.598  1.00  0.00           H
ATOM    927  HG3 LYS X  59     112.058 120.805 194.205  1.00  0.00           H
ATOM    928  CD  LYS X  59     112.835 122.471 193.149  1.00  0.00           C
ATOM    929  HD2 LYS X  59     113.264 123.205 193.832  1.00  0.00           H
ATOM    930  HD3 LYS X  59     113.345 122.654 192.203  1.00  0.00           H
ATOM    931  CE  LYS X  59     111.332 122.736 193.011  1.00  0.00           C
ATOM    932  HE2 LYS X  59     110.879 121.950 192.407  1.00  0.00           H
ATOM    933  HE3 LYS X  59     110.894 122.593 193.999  1.00  0.00           H
ATOM    934  NZ  LYS X  59     110.977 124.144 192.555  1.00  0.00           N
ATOM    935  HZ1 LYS X  59     111.437 124.203 191.658  1.00  0.00           H
ATOM    936  HZ2 LYS X  59     111.424 124.838 193.137  1.00  0.00           H
ATOM    937  HZ3 LYS X  59     109.980 124.301 192.510  1.00  0.00           H
ATOM    938  C   LYS X  59     113.727 118.170 193.929  1.00  0.00           C
ATOM    939  O   LYS X  59     112.559 117.816 193.968  1.00  0.00           O
ATOM    940  N   ILE X  60     114.578 117.410 193.226  1.00  0.00           N
ATOM    941  H   ILE X  60     115.549 117.632 193.396  1.00  0.00           H
ATOM    942  CA  ILE X  60     114.275 116.424 192.157  1.00  0.00           C
ATOM    943  HA  ILE X  60     113.190 116.520 192.106  1.00  0.00           H
ATOM    944  CB  ILE X  60     114.832 116.916 190.851  1.00  0.00           C
ATOM    945  HB  ILE X  60     114.270 117.826 190.640  1.00  0.00           H
ATOM    946  CG2 ILE X  60     116.296 117.148 190.906  1.00  0.00           C
ATOM    947 HG21 ILE X  60     116.543 117.440 189.885  1.00  0.00           H
ATOM    948 HG22 ILE X  60     116.841 116.294 191.307  1.00  0.00           H
ATOM    949 HG23 ILE X  60     116.384 118.115 191.401  1.00  0.00           H
ATOM    950  CG1 ILE X  60     114.572 115.894 189.619  1.00  0.00           C
ATOM    951 HG12 ILE X  60     114.830 116.361 188.668  1.00  0.00           H
ATOM    952 HG13 ILE X  60     115.226 115.023 189.571  1.00  0.00           H
ATOM    953  CD1 ILE X  60     113.123 115.421 189.427  1.00  0.00           C
ATOM    954 HD11 ILE X  60     112.670 114.997 190.323  1.00  0.00           H
ATOM    955 HD12 ILE X  60     113.029 114.557 188.769  1.00  0.00           H
ATOM    956 HD13 ILE X  60     112.598 116.325 189.119  1.00  0.00           H
ATOM    957  C   ILE X  60     114.664 115.020 192.568  1.00  0.00           C
ATOM    958  O   ILE X  60     114.031 114.018 192.183  1.00  0.00           O
ATOM    959  N   TYR X  61     115.674 114.884 193.460  1.00  0.00           N
ATOM    960  H   TYR X  61     116.199 115.692 193.764  1.00  0.00           H
ATOM    961  CA  TYR X  61     116.165 113.589 193.919  1.00  0.00           C
ATOM    962  HA  TYR X  61     115.748 112.824 193.264  1.00  0.00           H
ATOM    963  CB  TYR X  61     117.779 113.498 193.786  1.00  0.00           C
ATOM    964  HB2 TYR X  61     118.295 114.171 194.471  1.00  0.00           H
ATOM    965  HB3 TYR X  61     118.145 112.529 194.124  1.00  0.00           H
ATOM    966  CG  TYR X  61     118.293 113.652 192.324  1.00  0.00           C
ATOM    967  CD1 TYR X  61     117.388 113.477 191.235  1.00  0.00           C
ATOM    968  HD1 TYR X  61     116.322 113.360 191.360  1.00  0.00           H
ATOM    969  CE1 TYR X  61     117.911 113.465 189.907  1.00  0.00           C
ATOM    970  HE1 TYR X  61     117.256 113.370 189.054  1.00  0.00           H
ATOM    971  CZ  TYR X  61     119.314 113.638 189.764  1.00  0.00           C
ATOM    972  OH  TYR X  61     119.928 113.565 188.619  1.00  0.00           O
ATOM    973  HH  TYR X  61     119.392 113.029 188.030  1.00  0.00           H
ATOM    974  CE2 TYR X  61     120.192 113.915 190.857  1.00  0.00           C
ATOM    975  HE2 TYR X  61     121.256 113.925 190.672  1.00  0.00           H
ATOM    976  CD2 TYR X  61     119.631 113.957 192.147  1.00  0.00           C
ATOM    977  HD2 TYR X  61     120.418 113.972 192.886  1.00  0.00           H
ATOM    978  C   TYR X  61     115.742 113.172 195.380  1.00  0.00           C
ATOM    979  O   TYR X  61     115.982 112.039 195.743  1.00  0.00           O
ATOM    980  N   GLY X  62     115.164 114.086 196.163  1.00  0.00           N
ATOM    981  H   GLY X  62     115.038 115.022 195.806  1.00  0.00           H
ATOM    982  CA  GLY X  62     114.732 113.870 197.576  1.00  0.00           C
ATOM    983  HA2 GLY X  62     114.101 114.708 197.871  1.00  0.00           H
ATOM    984  HA3 GLY X  62     114.121 112.968 197.611  1.00  0.00           H
ATOM    985  C   GLY X  62     115.917 113.929 198.598  1.00  0.00           C
ATOM    986  O   GLY X  62     116.890 114.651 198.382  1.00  0.00           O
ATOM    987  N   PRO X  63     115.842 113.282 199.784  1.00  0.00           N
ATOM    988  CD  PRO X  63     114.649 112.623 200.242  1.00  0.00           C
ATOM    989  HD2 PRO X  63     114.743 111.544 200.121  1.00  0.00           H
ATOM    990  HD3 PRO X  63     113.737 112.949 199.742  1.00  0.00           H
ATOM    991  CG  PRO X  63     114.530 113.097 201.674  1.00  0.00           C
ATOM    992  HG2 PRO X  63     113.887 112.487 202.308  1.00  0.00           H
ATOM    993  HG3 PRO X  63     114.198 114.134 201.731  1.00  0.00           H
ATOM    994  CB  PRO X  63     115.992 112.886 202.097  1.00  0.00           C
ATOM    995  HB2 PRO X  63     116.125 111.837 202.361  1.00  0.00           H
ATOM    996  HB3 PRO X  63     116.137 113.496 202.988  1.00  0.00           H
ATOM    997  CA  PRO X  63     116.770 113.453 200.932  1.00  0.00           C
ATOM    998  HA  PRO X  63     116.971 114.523 200.976  1.00  0.00           H
ATOM    999  C   PRO X  63     118.046 112.583 200.898  1.00  0.00           C
ATOM   1000  O   PRO X  63     119.015 112.980 201.472  1.00  0.00           O
ATOM   1001  N   VAL X  64     118.083 111.568 200.052  1.00  0.00           N
ATOM   1002  H   VAL X  64     117.204 111.381 199.591  1.00  0.00           H
ATOM   1003  CA  VAL X  64     119.332 110.677 199.761  1.00  0.00           C
ATOM   1004  HA  VAL X  64     120.250 111.157 200.100  1.00  0.00           H
ATOM   1005  CB  VAL X  64     119.192 109.426 200.679  1.00  0.00           C
ATOM   1006  HB  VAL X  64     119.023 109.626 201.737  1.00  0.00           H
ATOM   1007  CG1 VAL X  64     117.865 108.743 200.266  1.00  0.00           C
ATOM   1008 HG11 VAL X  64     117.953 107.868 200.910  1.00  0.00           H
ATOM   1009 HG12 VAL X  64     116.986 109.371 200.408  1.00  0.00           H
ATOM   1010 HG13 VAL X  64     117.812 108.454 199.217  1.00  0.00           H
ATOM   1011  CG2 VAL X  64     120.347 108.333 200.552  1.00  0.00           C
ATOM   1012 HG21 VAL X  64     120.281 107.485 201.233  1.00  0.00           H
ATOM   1013 HG22 VAL X  64     121.313 108.726 200.869  1.00  0.00           H
ATOM   1014 HG23 VAL X  64     120.337 107.874 199.564  1.00  0.00           H
ATOM   1015  C   VAL X  64     119.507 110.289 198.285  1.00  0.00           C
ATOM   1016  O   VAL X  64     118.580 109.929 197.613  1.00  0.00           O
ATOM   1017  N   PHE X  65     120.754 110.356 197.796  1.00  0.00           N
ATOM   1018  H   PHE X  65     121.475 110.805 198.342  1.00  0.00           H
ATOM   1019  CA  PHE X  65     121.217 110.138 196.448  1.00  0.00           C
ATOM   1020  HA  PHE X  65     120.941 109.139 196.111  1.00  0.00           H
ATOM   1021  CB  PHE X  65     120.604 111.174 195.461  1.00  0.00           C
ATOM   1022  HB2 PHE X  65     120.959 110.881 194.473  1.00  0.00           H
ATOM   1023  HB3 PHE X  65     119.532 110.987 195.527  1.00  0.00           H
ATOM   1024  CG  PHE X  65     120.758 112.670 195.794  1.00  0.00           C
ATOM   1025  CD1 PHE X  65     121.680 113.479 195.072  1.00  0.00           C
ATOM   1026  HD1 PHE X  65     122.359 113.035 194.359  1.00  0.00           H
ATOM   1027  CE1 PHE X  65     121.621 114.887 195.207  1.00  0.00           C
ATOM   1028  HE1 PHE X  65     122.456 115.403 194.757  1.00  0.00           H
ATOM   1029  CZ  PHE X  65     120.653 115.527 196.016  1.00  0.00           C
ATOM   1030  HZ  PHE X  65     120.653 116.603 196.111  1.00  0.00           H
ATOM   1031  CE2 PHE X  65     119.837 114.698 196.849  1.00  0.00           C
ATOM   1032  HE2 PHE X  65     119.064 115.046 197.518  1.00  0.00           H
ATOM   1033  CD2 PHE X  65     119.850 113.302 196.633  1.00  0.00           C
ATOM   1034  HD2 PHE X  65     119.087 112.679 197.076  1.00  0.00           H
ATOM   1035  C   PHE X  65     122.731 110.150 196.336  1.00  0.00           C
ATOM   1036  O   PHE X  65     123.444 110.442 197.351  1.00  0.00           O
ATOM   1037  N   THR X  66     123.341 109.757 195.236  1.00  0.00           N
ATOM   1038  H   THR X  66     122.861 109.772 194.347  1.00  0.00           H
ATOM   1039  CA  THR X  66     124.826 109.554 195.052  1.00  0.00           C
ATOM   1040  HA  THR X  66     125.316 109.941 195.945  1.00  0.00           H
ATOM   1041  CB  THR X  66     125.172 108.091 195.086  1.00  0.00           C
ATOM   1042  HB  THR X  66     124.625 107.503 194.349  1.00  0.00           H
ATOM   1043  CG2 THR X  66     126.601 107.721 195.043  1.00  0.00           C
ATOM   1044 HG21 THR X  66     127.161 108.414 195.671  1.00  0.00           H
ATOM   1045 HG22 THR X  66     126.925 107.780 194.004  1.00  0.00           H
ATOM   1046 HG23 THR X  66     126.732 106.697 195.394  1.00  0.00           H
ATOM   1047  OG1 THR X  66     124.816 107.706 196.397  1.00  0.00           O
ATOM   1048  HG1 THR X  66     123.880 107.861 196.548  1.00  0.00           H
ATOM   1049  C   THR X  66     125.413 110.327 193.787  1.00  0.00           C
ATOM   1050  O   THR X  66     124.804 110.294 192.783  1.00  0.00           O
ATOM   1051  N   LEU X  67     126.609 111.024 193.878  1.00  0.00           N
ATOM   1052  H   LEU X  67     127.145 110.991 194.733  1.00  0.00           H
ATOM   1053  CA  LEU X  67     127.111 111.854 192.824  1.00  0.00           C
ATOM   1054  HA  LEU X  67     126.561 111.695 191.896  1.00  0.00           H
ATOM   1055  CB  LEU X  67     126.935 113.334 193.194  1.00  0.00           C
ATOM   1056  HB2 LEU X  67     127.665 113.530 193.979  1.00  0.00           H
ATOM   1057  HB3 LEU X  67     127.266 113.941 192.352  1.00  0.00           H
ATOM   1058  CG  LEU X  67     125.582 113.861 193.698  1.00  0.00           C
ATOM   1059  HG  LEU X  67     125.222 113.263 194.536  1.00  0.00           H
ATOM   1060  CD1 LEU X  67     125.752 115.317 194.061  1.00  0.00           C
ATOM   1061 HD11 LEU X  67     126.573 115.465 194.763  1.00  0.00           H
ATOM   1062 HD12 LEU X  67     124.820 115.671 194.503  1.00  0.00           H
ATOM   1063 HD13 LEU X  67     125.917 116.033 193.256  1.00  0.00           H
ATOM   1064  CD2 LEU X  67     124.527 113.926 192.569  1.00  0.00           C
ATOM   1065 HD21 LEU X  67     124.940 114.410 191.684  1.00  0.00           H
ATOM   1066 HD22 LEU X  67     124.261 112.903 192.306  1.00  0.00           H
ATOM   1067 HD23 LEU X  67     123.608 114.463 192.802  1.00  0.00           H
ATOM   1068  C   LEU X  67     128.511 111.492 192.476  1.00  0.00           C
ATOM   1069  O   LEU X  67     129.347 111.360 193.320  1.00  0.00           O
ATOM   1070  N   TYR X  68     128.753 111.391 191.171  1.00  0.00           N
ATOM   1071  H   TYR X  68     127.995 111.374 190.505  1.00  0.00           H
ATOM   1072  CA  TYR X  68     130.134 111.424 190.701  1.00  0.00           C
ATOM   1073  HA  TYR X  68     130.662 110.862 191.471  1.00  0.00           H
ATOM   1074  CB  TYR X  68     130.347 110.713 189.479  1.00  0.00           C
ATOM   1075  HB2 TYR X  68     129.592 110.914 188.718  1.00  0.00           H
ATOM   1076  HB3 TYR X  68     131.313 110.926 189.021  1.00  0.00           H
ATOM   1077  CG  TYR X  68     130.327 109.126 189.587  1.00  0.00           C
ATOM   1078  CD1 TYR X  68     129.125 108.544 189.831  1.00  0.00           C
ATOM   1079  HD1 TYR X  68     128.242 109.068 190.165  1.00  0.00           H
ATOM   1080  CE1 TYR X  68     129.046 107.131 189.891  1.00  0.00           C
ATOM   1081  HE1 TYR X  68     128.101 106.679 190.155  1.00  0.00           H
ATOM   1082  CZ  TYR X  68     130.220 106.391 189.816  1.00  0.00           C
ATOM   1083  OH  TYR X  68     130.076 105.034 190.115  1.00  0.00           O
ATOM   1084  HH  TYR X  68     129.157 104.898 190.357  1.00  0.00           H
ATOM   1085  CE2 TYR X  68     131.453 107.011 189.480  1.00  0.00           C
ATOM   1086  HE2 TYR X  68     132.313 106.363 189.398  1.00  0.00           H
ATOM   1087  CD2 TYR X  68     131.454 108.399 189.232  1.00  0.00           C
ATOM   1088  HD2 TYR X  68     132.362 108.922 188.972  1.00  0.00           H
ATOM   1089  C   TYR X  68     130.704 112.814 190.729  1.00  0.00           C
ATOM   1090  O   TYR X  68     129.925 113.751 190.597  1.00  0.00           O
ATOM   1091  N   PHE X  69     132.049 112.960 190.840  1.00  0.00           N
ATOM   1092  H   PHE X  69     132.556 112.099 190.983  1.00  0.00           H
ATOM   1093  CA  PHE X  69     132.826 114.272 190.570  1.00  0.00           C
ATOM   1094  HA  PHE X  69     132.222 114.906 189.920  1.00  0.00           H
ATOM   1095  CB  PHE X  69     133.100 115.018 191.940  1.00  0.00           C
ATOM   1096  HB2 PHE X  69     133.318 116.075 191.785  1.00  0.00           H
ATOM   1097  HB3 PHE X  69     132.078 115.113 192.309  1.00  0.00           H
ATOM   1098  CG  PHE X  69     134.047 114.441 192.995  1.00  0.00           C
ATOM   1099  CD1 PHE X  69     135.164 115.272 193.343  1.00  0.00           C
ATOM   1100  HD1 PHE X  69     135.343 116.246 192.912  1.00  0.00           H
ATOM   1101  CE1 PHE X  69     136.180 114.790 194.132  1.00  0.00           C
ATOM   1102  HE1 PHE X  69     137.099 115.332 194.300  1.00  0.00           H
ATOM   1103  CZ  PHE X  69     136.049 113.586 194.769  1.00  0.00           C
ATOM   1104  HZ  PHE X  69     136.829 113.208 195.412  1.00  0.00           H
ATOM   1105  CE2 PHE X  69     134.946 112.739 194.452  1.00  0.00           C
ATOM   1106  HE2 PHE X  69     134.922 111.756 194.900  1.00  0.00           H
ATOM   1107  CD2 PHE X  69     133.886 113.189 193.612  1.00  0.00           C
ATOM   1108  HD2 PHE X  69     132.975 112.609 193.574  1.00  0.00           H
ATOM   1109  C   PHE X  69     134.127 113.955 189.707  1.00  0.00           C
ATOM   1110  O   PHE X  69     135.097 114.625 189.901  1.00  0.00           O
ATOM   1111  N   GLY X  70     134.069 112.921 188.923  1.00  0.00           N
ATOM   1112  H   GLY X  70     133.198 112.447 188.731  1.00  0.00           H
ATOM   1113  CA  GLY X  70     135.151 112.428 188.091  1.00  0.00           C
ATOM   1114  HA2 GLY X  70     135.033 112.968 187.151  1.00  0.00           H
ATOM   1115  HA3 GLY X  70     136.108 112.649 188.563  1.00  0.00           H
ATOM   1116  C   GLY X  70     134.984 110.930 187.973  1.00  0.00           C
ATOM   1117  O   GLY X  70     133.935 110.364 187.797  1.00  0.00           O
ATOM   1118  N   LEU X  71     136.137 110.324 188.052  1.00  0.00           N
ATOM   1119  H   LEU X  71     136.914 110.869 188.398  1.00  0.00           H
ATOM   1120  CA  LEU X  71     136.197 108.825 188.291  1.00  0.00           C
ATOM   1121  HA  LEU X  71     135.692 108.357 187.445  1.00  0.00           H
ATOM   1122  CB  LEU X  71     137.624 108.269 188.352  1.00  0.00           C
ATOM   1123  HB2 LEU X  71     138.212 108.744 189.137  1.00  0.00           H
ATOM   1124  HB3 LEU X  71     137.590 107.214 188.624  1.00  0.00           H
ATOM   1125  CG  LEU X  71     138.392 108.260 186.950  1.00  0.00           C
ATOM   1126  HG  LEU X  71     137.719 108.198 186.094  1.00  0.00           H
ATOM   1127  CD1 LEU X  71     139.248 109.535 186.873  1.00  0.00           C
ATOM   1128 HD11 LEU X  71     139.732 109.656 185.904  1.00  0.00           H
ATOM   1129 HD12 LEU X  71     139.943 109.541 187.713  1.00  0.00           H
ATOM   1130 HD13 LEU X  71     138.572 110.388 186.927  1.00  0.00           H
ATOM   1131  CD2 LEU X  71     139.446 107.049 186.843  1.00  0.00           C
ATOM   1132 HD21 LEU X  71     138.892 106.117 186.732  1.00  0.00           H
ATOM   1133 HD22 LEU X  71     140.071 107.187 185.960  1.00  0.00           H
ATOM   1134 HD23 LEU X  71     140.008 106.967 187.773  1.00  0.00           H
ATOM   1135  C   LEU X  71     135.505 108.301 189.612  1.00  0.00           C
ATOM   1136  O   LEU X  71     135.308 107.121 189.739  1.00  0.00           O
ATOM   1137  N   GLU X  72     135.421 109.230 190.597  1.00  0.00           N
ATOM   1138  H   GLU X  72     135.688 110.189 190.429  1.00  0.00           H
ATOM   1139  CA  GLU X  72     134.986 108.858 192.027  1.00  0.00           C
ATOM   1140  HA  GLU X  72     134.831 107.796 192.217  1.00  0.00           H
ATOM   1141  CB  GLU X  72     136.063 109.386 193.038  1.00  0.00           C
ATOM   1142  HB2 GLU X  72     136.052 110.474 192.990  1.00  0.00           H
ATOM   1143  HB3 GLU X  72     135.714 109.237 194.060  1.00  0.00           H
ATOM   1144  CG  GLU X  72     137.417 108.720 192.845  1.00  0.00           C
ATOM   1145  HG2 GLU X  72     137.818 108.883 191.845  1.00  0.00           H
ATOM   1146  HG3 GLU X  72     138.156 109.195 193.490  1.00  0.00           H
ATOM   1147  CD  GLU X  72     137.514 107.197 193.016  1.00  0.00           C
ATOM   1148  OE1 GLU X  72     136.555 106.399 192.965  1.00  0.00           O
ATOM   1149  OE2 GLU X  72     138.643 106.809 193.249  1.00  0.00           O
ATOM   1150  C   GLU X  72     133.497 109.388 192.321  1.00  0.00           C
ATOM   1151  O   GLU X  72     132.992 110.305 191.654  1.00  0.00           O
ATOM   1152  N   ARG X  73     132.905 108.748 193.331  1.00  0.00           N
ATOM   1153  H   ARG X  73     133.278 107.943 193.813  1.00  0.00           H
ATOM   1154  CA  ARG X  73     131.590 109.115 193.834  1.00  0.00           C
ATOM   1155  HA  ARG X  73     131.404 110.094 193.394  1.00  0.00           H
ATOM   1156  CB  ARG X  73     130.499 108.204 193.176  1.00  0.00           C
ATOM   1157  HB2 ARG X  73     129.506 108.585 193.414  1.00  0.00           H
ATOM   1158  HB3 ARG X  73     130.512 108.339 192.095  1.00  0.00           H
ATOM   1159  CG  ARG X  73     130.617 106.718 193.633  1.00  0.00           C
ATOM   1160  HG2 ARG X  73     131.468 106.288 193.105  1.00  0.00           H
ATOM   1161  HG3 ARG X  73     130.682 106.700 194.721  1.00  0.00           H
ATOM   1162  CD  ARG X  73     129.427 105.748 193.267  1.00  0.00           C
ATOM   1163  HD2 ARG X  73     128.559 106.385 193.437  1.00  0.00           H
ATOM   1164  HD3 ARG X  73     129.318 105.548 192.201  1.00  0.00           H
ATOM   1165  NE  ARG X  73     129.487 104.472 194.011  1.00  0.00           N
ATOM   1166  HE  ARG X  73     130.172 104.459 194.752  1.00  0.00           H
ATOM   1167  CZ  ARG X  73     129.039 103.342 193.686  1.00  0.00           C
ATOM   1168  NH1 ARG X  73     128.309 102.993 192.651  1.00  0.00           N
ATOM   1169 HH11 ARG X  73     128.059 103.685 191.960  1.00  0.00           H
ATOM   1170 HH12 ARG X  73     128.167 102.005 192.497  1.00  0.00           H
ATOM   1171  NH2 ARG X  73     129.311 102.352 194.399  1.00  0.00           N
ATOM   1172 HH21 ARG X  73     129.710 102.519 195.312  1.00  0.00           H
ATOM   1173 HH22 ARG X  73     128.720 101.533 194.376  1.00  0.00           H
ATOM   1174  C   ARG X  73     131.394 109.349 195.345  1.00  0.00           C
ATOM   1175  O   ARG X  73     132.168 108.821 196.141  1.00  0.00           O
ATOM   1176  N   MET X  74     130.334 110.172 195.639  1.00  0.00           N
ATOM   1177  H   MET X  74     129.754 110.503 194.881  1.00  0.00           H
ATOM   1178  CA  MET X  74     129.989 110.606 196.947  1.00  0.00           C
ATOM   1179  HA  MET X  74     130.560 110.084 197.714  1.00  0.00           H
ATOM   1180  CB  MET X  74     130.445 112.096 197.075  1.00  0.00           C
ATOM   1181  HB2 MET X  74     130.366 112.523 198.075  1.00  0.00           H
ATOM   1182  HB3 MET X  74     131.468 112.233 196.723  1.00  0.00           H
ATOM   1183  CG  MET X  74     129.576 113.151 196.312  1.00  0.00           C
ATOM   1184  HG2 MET X  74     129.346 112.826 195.298  1.00  0.00           H
ATOM   1185  HG3 MET X  74     128.594 113.181 196.784  1.00  0.00           H
ATOM   1186  SD  MET X  74     130.099 114.825 196.065  1.00  0.00           S
ATOM   1187  CE  MET X  74     131.288 114.620 194.734  1.00  0.00           C
ATOM   1188  HE1 MET X  74     132.256 114.424 195.196  1.00  0.00           H
ATOM   1189  HE2 MET X  74     130.986 113.822 194.056  1.00  0.00           H
ATOM   1190  HE3 MET X  74     131.275 115.576 194.212  1.00  0.00           H
ATOM   1191  C   MET X  74     128.479 110.457 197.277  1.00  0.00           C
ATOM   1192  O   MET X  74     127.681 110.710 196.402  1.00  0.00           O
ATOM   1193  N   VAL X  75     128.102 110.002 198.479  1.00  0.00           N
ATOM   1194  H   VAL X  75     128.769 109.670 199.161  1.00  0.00           H
ATOM   1195  CA  VAL X  75     126.747 109.927 198.910  1.00  0.00           C
ATOM   1196  HA  VAL X  75     126.172 109.880 197.985  1.00  0.00           H
ATOM   1197  CB  VAL X  75     126.402 108.627 199.786  1.00  0.00           C
ATOM   1198  HB  VAL X  75     126.829 108.734 200.784  1.00  0.00           H
ATOM   1199  CG1 VAL X  75     124.865 108.248 199.831  1.00  0.00           C
ATOM   1200 HG11 VAL X  75     124.510 107.467 200.504  1.00  0.00           H
ATOM   1201 HG12 VAL X  75     124.246 109.135 199.967  1.00  0.00           H
ATOM   1202 HG13 VAL X  75     124.570 107.825 198.871  1.00  0.00           H
ATOM   1203  CG2 VAL X  75     127.139 107.337 199.359  1.00  0.00           C
ATOM   1204 HG21 VAL X  75     126.604 107.059 198.452  1.00  0.00           H
ATOM   1205 HG22 VAL X  75     127.126 106.540 200.103  1.00  0.00           H
ATOM   1206 HG23 VAL X  75     128.162 107.571 199.064  1.00  0.00           H
ATOM   1207  C   VAL X  75     126.306 111.265 199.587  1.00  0.00           C
ATOM   1208  O   VAL X  75     127.048 111.829 200.389  1.00  0.00           O
ATOM   1209  N   VAL X  76     125.123 111.789 199.205  1.00  0.00           N
ATOM   1210  H   VAL X  76     124.550 111.217 198.600  1.00  0.00           H
ATOM   1211  CA  VAL X  76     124.564 112.996 199.756  1.00  0.00           C
ATOM   1212  HA  VAL X  76     125.341 113.324 200.447  1.00  0.00           H
ATOM   1213  CB  VAL X  76     124.554 114.093 198.670  1.00  0.00           C
ATOM   1214  HB  VAL X  76     124.028 114.951 199.089  1.00  0.00           H
ATOM   1215  CG1 VAL X  76     125.976 114.495 198.267  1.00  0.00           C
ATOM   1216 HG11 VAL X  76     126.515 114.926 199.110  1.00  0.00           H
ATOM   1217 HG12 VAL X  76     126.651 113.689 197.978  1.00  0.00           H
ATOM   1218 HG13 VAL X  76     125.986 115.209 197.443  1.00  0.00           H
ATOM   1219  CG2 VAL X  76     123.676 113.644 197.491  1.00  0.00           C
ATOM   1220 HG21 VAL X  76     124.069 112.751 197.005  1.00  0.00           H
ATOM   1221 HG22 VAL X  76     123.764 114.488 196.808  1.00  0.00           H
ATOM   1222 HG23 VAL X  76     122.606 113.524 197.660  1.00  0.00           H
ATOM   1223  C   VAL X  76     123.324 112.801 200.575  1.00  0.00           C
ATOM   1224  O   VAL X  76     122.414 112.001 200.330  1.00  0.00           O
ATOM   1225  N   LEU X  77     123.304 113.509 201.729  1.00  0.00           N
ATOM   1226  H   LEU X  77     124.188 113.941 201.960  1.00  0.00           H
ATOM   1227  CA  LEU X  77     122.190 113.472 202.687  1.00  0.00           C
ATOM   1228  HA  LEU X  77     121.365 112.962 202.190  1.00  0.00           H
ATOM   1229  CB  LEU X  77     122.520 112.596 203.925  1.00  0.00           C
ATOM   1230  HB2 LEU X  77     123.427 113.005 204.371  1.00  0.00           H
ATOM   1231  HB3 LEU X  77     121.707 112.736 204.637  1.00  0.00           H
ATOM   1232  CG  LEU X  77     122.741 111.087 203.682  1.00  0.00           C
ATOM   1233  HG  LEU X  77     123.510 110.984 202.916  1.00  0.00           H
ATOM   1234  CD1 LEU X  77     123.280 110.461 204.946  1.00  0.00           C
ATOM   1235 HD11 LEU X  77     122.602 110.415 205.798  1.00  0.00           H
ATOM   1236 HD12 LEU X  77     124.098 111.124 205.229  1.00  0.00           H
ATOM   1237 HD13 LEU X  77     123.636 109.447 204.764  1.00  0.00           H
ATOM   1238  CD2 LEU X  77     121.458 110.334 203.400  1.00  0.00           C
ATOM   1239 HD21 LEU X  77     121.723 109.290 203.230  1.00  0.00           H
ATOM   1240 HD22 LEU X  77     120.791 110.495 204.247  1.00  0.00           H
ATOM   1241 HD23 LEU X  77     121.045 110.858 202.538  1.00  0.00           H
ATOM   1242  C   LEU X  77     121.732 114.918 202.997  1.00  0.00           C
ATOM   1243  O   LEU X  77     122.492 115.798 203.339  1.00  0.00           O
ATOM   1244  N   HIE X  78     120.455 115.163 202.737  1.00  0.00           N
ATOM   1245  H   HIE X  78     119.886 114.361 202.505  1.00  0.00           H
ATOM   1246  CA  HIE X  78     119.827 116.475 202.666  1.00  0.00           C
ATOM   1247  HA  HIE X  78     120.540 117.212 203.036  1.00  0.00           H
ATOM   1248  CB  HIE X  78     119.859 116.944 201.283  1.00  0.00           C
ATOM   1249  HB2 HIE X  78     120.901 116.888 200.968  1.00  0.00           H
ATOM   1250  HB3 HIE X  78     119.244 116.250 200.709  1.00  0.00           H
ATOM   1251  CG  HIE X  78     119.229 118.335 201.218  1.00  0.00           C
ATOM   1252  ND1 HIE X  78     120.036 119.477 201.309  1.00  0.00           N
ATOM   1253  CE1 HIE X  78     119.211 120.557 201.216  1.00  0.00           C
ATOM   1254  HE1 HIE X  78     119.568 121.518 201.556  1.00  0.00           H
ATOM   1255  NE2 HIE X  78     117.951 120.091 200.991  1.00  0.00           N
ATOM   1256  HE2 HIE X  78     117.143 120.689 200.891  1.00  0.00           H
ATOM   1257  CD2 HIE X  78     117.932 118.710 201.066  1.00  0.00           C
ATOM   1258  HD2 HIE X  78     117.058 118.081 200.981  1.00  0.00           H
ATOM   1259  C   HIE X  78     118.437 116.505 203.390  1.00  0.00           C
ATOM   1260  O   HIE X  78     117.446 115.771 203.086  1.00  0.00           O
ATOM   1261  N   GLY X  79     118.368 117.448 204.377  1.00  0.00           N
ATOM   1262  H   GLY X  79     119.244 117.916 204.557  1.00  0.00           H
ATOM   1263  CA  GLY X  79     117.238 117.672 205.230  1.00  0.00           C
ATOM   1264  HA2 GLY X  79     117.241 118.743 205.432  1.00  0.00           H
ATOM   1265  HA3 GLY X  79     116.326 117.490 204.661  1.00  0.00           H
ATOM   1266  C   GLY X  79     117.249 116.937 206.602  1.00  0.00           C
ATOM   1267  O   GLY X  79     117.849 115.825 206.693  1.00  0.00           O
ATOM   1268  N   TYR X  80     116.505 117.435 207.568  1.00  0.00           N
ATOM   1269  H   TYR X  80     116.007 118.299 207.410  1.00  0.00           H
ATOM   1270  CA  TYR X  80     116.541 116.924 208.888  1.00  0.00           C
ATOM   1271  HA  TYR X  80     117.598 116.954 209.154  1.00  0.00           H
ATOM   1272  CB  TYR X  80     115.731 117.799 209.858  1.00  0.00           C
ATOM   1273  HB2 TYR X  80     116.127 118.802 209.695  1.00  0.00           H
ATOM   1274  HB3 TYR X  80     114.686 117.893 209.562  1.00  0.00           H
ATOM   1275  CG  TYR X  80     115.854 117.407 211.349  1.00  0.00           C
ATOM   1276  CD1 TYR X  80     116.960 117.681 212.166  1.00  0.00           C
ATOM   1277  HD1 TYR X  80     117.798 118.228 211.759  1.00  0.00           H
ATOM   1278  CE1 TYR X  80     117.046 117.303 213.487  1.00  0.00           C
ATOM   1279  HE1 TYR X  80     117.907 117.511 214.105  1.00  0.00           H
ATOM   1280  CZ  TYR X  80     115.957 116.582 214.058  1.00  0.00           C
ATOM   1281  OH  TYR X  80     116.009 116.166 215.320  1.00  0.00           O
ATOM   1282  HH  TYR X  80     116.717 116.652 215.749  1.00  0.00           H
ATOM   1283  CE2 TYR X  80     114.810 116.299 213.274  1.00  0.00           C
ATOM   1284  HE2 TYR X  80     114.026 115.654 213.643  1.00  0.00           H
ATOM   1285  CD2 TYR X  80     114.783 116.665 211.856  1.00  0.00           C
ATOM   1286  HD2 TYR X  80     113.961 116.508 211.173  1.00  0.00           H
ATOM   1287  C   TYR X  80     116.077 115.449 208.946  1.00  0.00           C
ATOM   1288  O   TYR X  80     116.653 114.689 209.763  1.00  0.00           O
ATOM   1289  N   GLU X  81     115.139 115.048 208.108  1.00  0.00           N
ATOM   1290  H   GLU X  81     114.768 115.747 207.481  1.00  0.00           H
ATOM   1291  CA  GLU X  81     114.678 113.675 207.957  1.00  0.00           C
ATOM   1292  HA  GLU X  81     114.073 113.390 208.819  1.00  0.00           H
ATOM   1293  CB  GLU X  81     113.730 113.668 206.732  1.00  0.00           C
ATOM   1294  HB2 GLU X  81     113.483 112.635 206.487  1.00  0.00           H
ATOM   1295  HB3 GLU X  81     112.908 114.302 207.066  1.00  0.00           H
ATOM   1296  CG  GLU X  81     114.317 114.182 205.455  1.00  0.00           C
ATOM   1297  HG2 GLU X  81     115.385 113.972 205.524  1.00  0.00           H
ATOM   1298  HG3 GLU X  81     113.813 113.648 204.650  1.00  0.00           H
ATOM   1299  CD  GLU X  81     113.929 115.652 205.175  1.00  0.00           C
ATOM   1300  OE1 GLU X  81     113.838 116.523 206.106  1.00  0.00           O
ATOM   1301  OE2 GLU X  81     113.615 115.999 204.026  1.00  0.00           O
ATOM   1302  C   GLU X  81     115.784 112.724 207.919  1.00  0.00           C
ATOM   1303  O   GLU X  81     115.546 111.652 208.467  1.00  0.00           O
ATOM   1304  N   VAL X  82     116.927 112.962 207.317  1.00  0.00           N
ATOM   1305  H   VAL X  82     117.084 113.890 206.949  1.00  0.00           H
ATOM   1306  CA  VAL X  82     118.092 112.057 207.256  1.00  0.00           C
ATOM   1307  HA  VAL X  82     117.716 111.074 207.541  1.00  0.00           H
ATOM   1308  CB  VAL X  82     118.514 111.807 205.816  1.00  0.00           C
ATOM   1309  HB  VAL X  82     119.461 111.269 205.858  1.00  0.00           H
ATOM   1310  CG1 VAL X  82     117.508 110.864 205.130  1.00  0.00           C
ATOM   1311 HG11 VAL X  82     117.653 109.849 205.500  1.00  0.00           H
ATOM   1312 HG12 VAL X  82     116.486 111.166 205.361  1.00  0.00           H
ATOM   1313 HG13 VAL X  82     117.727 110.802 204.064  1.00  0.00           H
ATOM   1314  CG2 VAL X  82     118.860 113.136 205.083  1.00  0.00           C
ATOM   1315 HG21 VAL X  82     119.285 112.978 204.092  1.00  0.00           H
ATOM   1316 HG22 VAL X  82     119.518 113.768 205.680  1.00  0.00           H
ATOM   1317 HG23 VAL X  82     117.993 113.769 204.892  1.00  0.00           H
ATOM   1318  C   VAL X  82     119.313 112.401 207.992  1.00  0.00           C
ATOM   1319  O   VAL X  82     120.060 111.485 208.339  1.00  0.00           O
ATOM   1320  N   VAL X  83     119.495 113.711 208.220  1.00  0.00           N
ATOM   1321  H   VAL X  83     119.059 114.396 207.619  1.00  0.00           H
ATOM   1322  CA  VAL X  83     120.563 114.154 209.144  1.00  0.00           C
ATOM   1323  HA  VAL X  83     121.518 113.861 208.705  1.00  0.00           H
ATOM   1324  CB  VAL X  83     120.570 115.682 209.229  1.00  0.00           C
ATOM   1325  HB  VAL X  83     119.540 115.963 209.450  1.00  0.00           H
ATOM   1326  CG1 VAL X  83     121.576 116.133 210.250  1.00  0.00           C
ATOM   1327 HG11 VAL X  83     121.245 115.847 211.248  1.00  0.00           H
ATOM   1328 HG12 VAL X  83     122.609 115.853 210.044  1.00  0.00           H
ATOM   1329 HG13 VAL X  83     121.619 117.222 210.233  1.00  0.00           H
ATOM   1330  CG2 VAL X  83     120.880 116.378 207.879  1.00  0.00           C
ATOM   1331 HG21 VAL X  83     121.924 116.270 207.586  1.00  0.00           H
ATOM   1332 HG22 VAL X  83     120.728 117.455 207.941  1.00  0.00           H
ATOM   1333 HG23 VAL X  83     120.241 116.013 207.075  1.00  0.00           H
ATOM   1334  C   VAL X  83     120.362 113.499 210.504  1.00  0.00           C
ATOM   1335  O   VAL X  83     121.291 112.935 211.040  1.00  0.00           O
ATOM   1336  N   LYS X  84     119.133 113.455 211.042  1.00  0.00           N
ATOM   1337  H   LYS X  84     118.322 113.845 210.585  1.00  0.00           H
ATOM   1338  CA  LYS X  84     118.787 112.677 212.263  1.00  0.00           C
ATOM   1339  HA  LYS X  84     119.466 113.033 213.037  1.00  0.00           H
ATOM   1340  CB  LYS X  84     117.453 113.126 212.818  1.00  0.00           C
ATOM   1341  HB2 LYS X  84     117.502 114.208 212.940  1.00  0.00           H
ATOM   1342  HB3 LYS X  84     116.705 113.010 212.034  1.00  0.00           H
ATOM   1343  CG  LYS X  84     116.900 112.431 214.174  1.00  0.00           C
ATOM   1344  HG2 LYS X  84     117.732 112.382 214.876  1.00  0.00           H
ATOM   1345  HG3 LYS X  84     116.098 113.090 214.507  1.00  0.00           H
ATOM   1346  CD  LYS X  84     116.340 111.048 213.951  1.00  0.00           C
ATOM   1347  HD2 LYS X  84     115.800 110.923 213.012  1.00  0.00           H
ATOM   1348  HD3 LYS X  84     117.154 110.324 213.927  1.00  0.00           H
ATOM   1349  CE  LYS X  84     115.309 110.555 215.031  1.00  0.00           C
ATOM   1350  HE2 LYS X  84     115.750 110.634 216.024  1.00  0.00           H
ATOM   1351  HE3 LYS X  84     114.431 111.195 215.115  1.00  0.00           H
ATOM   1352  NZ  LYS X  84     114.764 109.164 214.829  1.00  0.00           N
ATOM   1353  HZ1 LYS X  84     114.204 108.933 215.637  1.00  0.00           H
ATOM   1354  HZ2 LYS X  84     115.526 108.502 214.790  1.00  0.00           H
ATOM   1355  HZ3 LYS X  84     114.243 109.076 213.968  1.00  0.00           H
ATOM   1356  C   LYS X  84     119.024 111.172 212.096  1.00  0.00           C
ATOM   1357  O   LYS X  84     119.727 110.544 212.888  1.00  0.00           O
ATOM   1358  N   GLU X  85     118.451 110.630 211.032  1.00  0.00           N
ATOM   1359  H   GLU X  85     117.965 111.297 210.449  1.00  0.00           H
ATOM   1360  CA  GLU X  85     118.389 109.165 210.759  1.00  0.00           C
ATOM   1361  HA  GLU X  85     117.808 108.732 211.573  1.00  0.00           H
ATOM   1362  CB  GLU X  85     117.606 108.987 209.415  1.00  0.00           C
ATOM   1363  HB2 GLU X  85     116.694 109.585 209.382  1.00  0.00           H
ATOM   1364  HB3 GLU X  85     118.249 109.268 208.581  1.00  0.00           H
ATOM   1365  CG  GLU X  85     117.130 107.558 209.167  1.00  0.00           C
ATOM   1366  HG2 GLU X  85     116.867 107.441 208.116  1.00  0.00           H
ATOM   1367  HG3 GLU X  85     117.875 106.784 209.351  1.00  0.00           H
ATOM   1368  CD  GLU X  85     115.930 107.186 210.003  1.00  0.00           C
ATOM   1369  OE1 GLU X  85     114.853 107.121 209.441  1.00  0.00           O
ATOM   1370  OE2 GLU X  85     116.005 107.317 211.243  1.00  0.00           O
ATOM   1371  C   GLU X  85     119.775 108.495 210.600  1.00  0.00           C
ATOM   1372  O   GLU X  85     119.994 107.416 211.075  1.00  0.00           O
ATOM   1373  N   ALA X  86     120.775 109.203 210.076  1.00  0.00           N
ATOM   1374  H   ALA X  86     120.434 110.096 209.749  1.00  0.00           H
ATOM   1375  CA  ALA X  86     122.121 108.791 209.922  1.00  0.00           C
ATOM   1376  HA  ALA X  86     122.273 107.733 209.711  1.00  0.00           H
ATOM   1377  CB  ALA X  86     122.786 109.528 208.698  1.00  0.00           C
ATOM   1378  HB1 ALA X  86     123.808 109.277 208.413  1.00  0.00           H
ATOM   1379  HB2 ALA X  86     122.648 110.609 208.708  1.00  0.00           H
ATOM   1380  HB3 ALA X  86     122.273 109.253 207.776  1.00  0.00           H
ATOM   1381  C   ALA X  86     122.908 109.149 211.213  1.00  0.00           C
ATOM   1382  O   ALA X  86     123.408 108.320 211.976  1.00  0.00           O
ATOM   1383  N   LEU X  87     123.129 110.448 211.432  1.00  0.00           N
ATOM   1384  H   LEU X  87     122.569 111.115 210.921  1.00  0.00           H
ATOM   1385  CA  LEU X  87     124.108 110.959 212.406  1.00  0.00           C
ATOM   1386  HA  LEU X  87     124.951 110.285 212.254  1.00  0.00           H
ATOM   1387  CB  LEU X  87     124.594 112.366 212.073  1.00  0.00           C
ATOM   1388  HB2 LEU X  87     123.781 113.065 212.270  1.00  0.00           H
ATOM   1389  HB3 LEU X  87     125.414 112.591 212.755  1.00  0.00           H
ATOM   1390  CG  LEU X  87     125.133 112.606 210.672  1.00  0.00           C
ATOM   1391  HG  LEU X  87     124.313 112.374 209.992  1.00  0.00           H
ATOM   1392  CD1 LEU X  87     125.460 114.161 210.526  1.00  0.00           C
ATOM   1393 HD11 LEU X  87     125.596 114.439 209.481  1.00  0.00           H
ATOM   1394 HD12 LEU X  87     126.245 114.515 211.193  1.00  0.00           H
ATOM   1395 HD13 LEU X  87     124.604 114.706 210.925  1.00  0.00           H
ATOM   1396  CD2 LEU X  87     126.307 111.704 210.345  1.00  0.00           C
ATOM   1397 HD21 LEU X  87     127.093 111.857 211.084  1.00  0.00           H
ATOM   1398 HD22 LEU X  87     125.991 110.662 210.301  1.00  0.00           H
ATOM   1399 HD23 LEU X  87     126.663 111.947 209.344  1.00  0.00           H
ATOM   1400  C   LEU X  87     123.696 110.755 213.842  1.00  0.00           C
ATOM   1401  O   LEU X  87     124.456 110.279 214.705  1.00  0.00           O
ATOM   1402  N   ILE X  88     122.438 111.056 214.184  1.00  0.00           N
ATOM   1403  H   ILE X  88     121.770 111.278 213.459  1.00  0.00           H
ATOM   1404  CA  ILE X  88     122.029 110.998 215.588  1.00  0.00           C
ATOM   1405  HA  ILE X  88     122.809 111.313 216.280  1.00  0.00           H
ATOM   1406  CB  ILE X  88     120.772 111.933 215.799  1.00  0.00           C
ATOM   1407  HB  ILE X  88     120.006 111.748 215.046  1.00  0.00           H
ATOM   1408  CG2 ILE X  88     120.028 111.718 217.135  1.00  0.00           C
ATOM   1409 HG21 ILE X  88     120.658 112.038 217.965  1.00  0.00           H
ATOM   1410 HG22 ILE X  88     119.823 110.661 217.304  1.00  0.00           H
ATOM   1411 HG23 ILE X  88     119.032 112.161 217.166  1.00  0.00           H
ATOM   1412  CG1 ILE X  88     121.172 113.461 215.673  1.00  0.00           C
ATOM   1413 HG12 ILE X  88     121.808 113.739 216.513  1.00  0.00           H
ATOM   1414 HG13 ILE X  88     121.825 113.693 214.832  1.00  0.00           H
ATOM   1415  CD1 ILE X  88     119.917 114.422 215.742  1.00  0.00           C
ATOM   1416 HD11 ILE X  88     120.325 115.431 215.681  1.00  0.00           H
ATOM   1417 HD12 ILE X  88     119.369 114.235 216.666  1.00  0.00           H
ATOM   1418 HD13 ILE X  88     119.267 114.347 214.871  1.00  0.00           H
ATOM   1419  C   ILE X  88     121.743 109.529 215.945  1.00  0.00           C
ATOM   1420  O   ILE X  88     122.046 109.156 217.089  1.00  0.00           O
ATOM   1421  N   ASP X  89     121.228 108.692 215.058  1.00  0.00           N
ATOM   1422  H   ASP X  89     121.029 108.987 214.112  1.00  0.00           H
ATOM   1423  CA  ASP X  89     120.668 107.437 215.459  1.00  0.00           C
ATOM   1424  HA  ASP X  89     120.794 107.386 216.540  1.00  0.00           H
ATOM   1425  CB  ASP X  89     119.179 107.300 215.144  1.00  0.00           C
ATOM   1426  HB2 ASP X  89     118.907 107.600 214.132  1.00  0.00           H
ATOM   1427  HB3 ASP X  89     118.973 106.234 215.042  1.00  0.00           H
ATOM   1428  CG  ASP X  89     118.131 107.852 216.162  1.00  0.00           C
ATOM   1429  OD1 ASP X  89     118.549 108.329 217.288  1.00  0.00           O
ATOM   1430  OD2 ASP X  89     116.945 107.782 215.760  1.00  0.00           O
ATOM   1431  C   ASP X  89     121.511 106.194 214.918  1.00  0.00           C
ATOM   1432  O   ASP X  89     121.697 105.147 215.602  1.00  0.00           O
ATOM   1433  N   LEU X  90     122.237 106.307 213.800  1.00  0.00           N
ATOM   1434  H   LEU X  90     122.118 107.183 213.312  1.00  0.00           H
ATOM   1435  CA  LEU X  90     123.302 105.350 213.353  1.00  0.00           C
ATOM   1436  HA  LEU X  90     123.275 104.508 214.044  1.00  0.00           H
ATOM   1437  CB  LEU X  90     123.015 104.802 211.842  1.00  0.00           C
ATOM   1438  HB2 LEU X  90     123.269 105.651 211.208  1.00  0.00           H
ATOM   1439  HB3 LEU X  90     123.733 104.003 211.661  1.00  0.00           H
ATOM   1440  CG  LEU X  90     121.608 104.331 211.418  1.00  0.00           C
ATOM   1441  HG  LEU X  90     120.862 105.065 211.720  1.00  0.00           H
ATOM   1442  CD1 LEU X  90     121.437 104.368 209.909  1.00  0.00           C
ATOM   1443 HD11 LEU X  90     121.748 105.325 209.489  1.00  0.00           H
ATOM   1444 HD12 LEU X  90     120.386 104.170 209.700  1.00  0.00           H
ATOM   1445 HD13 LEU X  90     122.011 103.612 209.373  1.00  0.00           H
ATOM   1446  CD2 LEU X  90     121.208 102.991 212.047  1.00  0.00           C
ATOM   1447 HD21 LEU X  90     120.240 102.642 211.686  1.00  0.00           H
ATOM   1448 HD22 LEU X  90     121.971 102.275 211.741  1.00  0.00           H
ATOM   1449 HD23 LEU X  90     121.093 102.976 213.131  1.00  0.00           H
ATOM   1450  C   LEU X  90     124.717 105.935 213.523  1.00  0.00           C
ATOM   1451  O   LEU X  90     125.620 105.476 212.779  1.00  0.00           O
ATOM   1452  N   GLY X  91     124.943 106.965 214.346  1.00  0.00           N
ATOM   1453  H   GLY X  91     124.219 107.383 214.913  1.00  0.00           H
ATOM   1454  CA  GLY X  91     126.270 107.629 214.401  1.00  0.00           C
ATOM   1455  HA2 GLY X  91     126.428 108.147 213.455  1.00  0.00           H
ATOM   1456  HA3 GLY X  91     126.186 108.389 215.178  1.00  0.00           H
ATOM   1457  C   GLY X  91     127.442 106.759 214.734  1.00  0.00           C
ATOM   1458  O   GLY X  91     128.541 107.140 214.402  1.00  0.00           O
ATOM   1459  N   GLU X  92     127.330 105.536 215.362  1.00  0.00           N
ATOM   1460  H   GLU X  92     126.396 105.290 215.656  1.00  0.00           H
ATOM   1461  CA  GLU X  92     128.469 104.617 215.703  1.00  0.00           C
ATOM   1462  HA  GLU X  92     129.358 105.209 215.919  1.00  0.00           H
ATOM   1463  CB  GLU X  92     128.065 103.700 216.805  1.00  0.00           C
ATOM   1464  HB2 GLU X  92     127.134 103.212 216.517  1.00  0.00           H
ATOM   1465  HB3 GLU X  92     128.863 102.959 216.833  1.00  0.00           H
ATOM   1466  CG  GLU X  92     128.069 104.306 218.237  1.00  0.00           C
ATOM   1467  HG2 GLU X  92     127.402 105.151 218.410  1.00  0.00           H
ATOM   1468  HG3 GLU X  92     127.600 103.579 218.901  1.00  0.00           H
ATOM   1469  CD  GLU X  92     129.452 104.755 218.790  1.00  0.00           C
ATOM   1470  OE1 GLU X  92     129.497 105.464 219.804  1.00  0.00           O
ATOM   1471  OE2 GLU X  92     130.507 104.262 218.346  1.00  0.00           O
ATOM   1472  C   GLU X  92     128.762 103.660 214.468  1.00  0.00           C
ATOM   1473  O   GLU X  92     129.902 103.339 214.174  1.00  0.00           O
ATOM   1474  N   GLU X  93     127.737 103.499 213.572  1.00  0.00           N
ATOM   1475  H   GLU X  93     126.934 104.090 213.732  1.00  0.00           H
ATOM   1476  CA  GLU X  93     127.885 102.934 212.253  1.00  0.00           C
ATOM   1477  HA  GLU X  93     128.626 102.135 212.216  1.00  0.00           H
ATOM   1478  CB  GLU X  93     126.619 102.342 211.747  1.00  0.00           C
ATOM   1479  HB2 GLU X  93     126.001 103.130 211.315  1.00  0.00           H
ATOM   1480  HB3 GLU X  93     126.855 101.692 210.905  1.00  0.00           H
ATOM   1481  CG  GLU X  93     125.788 101.372 212.628  1.00  0.00           C
ATOM   1482  HG2 GLU X  93     125.197 101.994 213.299  1.00  0.00           H
ATOM   1483  HG3 GLU X  93     125.128 100.638 212.165  1.00  0.00           H
ATOM   1484  CD  GLU X  93     126.612 100.507 213.560  1.00  0.00           C
ATOM   1485  OE1 GLU X  93     127.605  99.890 213.085  1.00  0.00           O
ATOM   1486  OE2 GLU X  93     126.185 100.376 214.729  1.00  0.00           O
ATOM   1487  C   GLU X  93     128.465 103.941 211.292  1.00  0.00           C
ATOM   1488  O   GLU X  93     129.451 103.590 210.677  1.00  0.00           O
ATOM   1489  N   PHE X  94     128.004 105.188 211.267  1.00  0.00           N
ATOM   1490  H   PHE X  94     127.252 105.328 211.927  1.00  0.00           H
ATOM   1491  CA  PHE X  94     128.497 106.366 210.589  1.00  0.00           C
ATOM   1492  HA  PHE X  94     128.868 106.141 209.589  1.00  0.00           H
ATOM   1493  CB  PHE X  94     127.438 107.367 210.313  1.00  0.00           C
ATOM   1494  HB2 PHE X  94     127.009 107.610 211.285  1.00  0.00           H
ATOM   1495  HB3 PHE X  94     127.858 108.305 209.949  1.00  0.00           H
ATOM   1496  CG  PHE X  94     126.404 106.872 209.264  1.00  0.00           C
ATOM   1497  CD1 PHE X  94     125.517 105.761 209.428  1.00  0.00           C
ATOM   1498  HD1 PHE X  94     125.534 105.214 210.359  1.00  0.00           H
ATOM   1499  CE1 PHE X  94     124.649 105.316 208.417  1.00  0.00           C
ATOM   1500  HE1 PHE X  94     123.892 104.562 208.574  1.00  0.00           H
ATOM   1501  CZ  PHE X  94     124.653 105.941 207.188  1.00  0.00           C
ATOM   1502  HZ  PHE X  94     124.011 105.688 206.357  1.00  0.00           H
ATOM   1503  CE2 PHE X  94     125.521 107.058 206.974  1.00  0.00           C
ATOM   1504  HE2 PHE X  94     125.588 107.565 206.022  1.00  0.00           H
ATOM   1505  CD2 PHE X  94     126.334 107.543 208.045  1.00  0.00           C
ATOM   1506  HD2 PHE X  94     127.107 108.258 207.808  1.00  0.00           H
ATOM   1507  C   PHE X  94     129.707 107.033 211.243  1.00  0.00           C
ATOM   1508  O   PHE X  94     130.043 108.202 210.926  1.00  0.00           O
ATOM   1509  N   SER X  95     130.493 106.351 212.065  1.00  0.00           N
ATOM   1510  H   SER X  95     130.154 105.469 212.423  1.00  0.00           H
ATOM   1511  CA  SER X  95     131.672 106.894 212.822  1.00  0.00           C
ATOM   1512  HA  SER X  95     131.319 107.737 213.415  1.00  0.00           H
ATOM   1513  CB  SER X  95     132.090 105.863 213.913  1.00  0.00           C
ATOM   1514  HB2 SER X  95     131.218 105.716 214.551  1.00  0.00           H
ATOM   1515  HB3 SER X  95     132.419 104.884 213.565  1.00  0.00           H
ATOM   1516  OG  SER X  95     133.145 106.374 214.643  1.00  0.00           O
ATOM   1517  HG  SER X  95     132.926 106.287 215.573  1.00  0.00           H
ATOM   1518  C   SER X  95     132.991 107.259 212.035  1.00  0.00           C
ATOM   1519  O   SER X  95     133.740 108.134 212.407  1.00  0.00           O
ATOM   1520  N   GLY X  96     133.157 106.595 210.915  1.00  0.00           N
ATOM   1521  H   GLY X  96     132.400 106.101 210.465  1.00  0.00           H
ATOM   1522  CA  GLY X  96     134.301 106.838 210.088  1.00  0.00           C
ATOM   1523  HA2 GLY X  96     135.296 106.555 210.430  1.00  0.00           H
ATOM   1524  HA3 GLY X  96     134.073 106.226 209.215  1.00  0.00           H
ATOM   1525  C   GLY X  96     134.322 108.326 209.563  1.00  0.00           C
ATOM   1526  O   GLY X  96     133.359 109.040 209.581  1.00  0.00           O
ATOM   1527  N   ARG X  97     135.462 108.798 209.074  1.00  0.00           N
ATOM   1528  H   ARG X  97     136.295 108.305 209.363  1.00  0.00           H
ATOM   1529  CA  ARG X  97     135.559 109.973 208.111  1.00  0.00           C
ATOM   1530  HA  ARG X  97     134.622 110.528 208.159  1.00  0.00           H
ATOM   1531  CB  ARG X  97     136.786 110.763 208.565  1.00  0.00           C
ATOM   1532  HB2 ARG X  97     137.473 109.953 208.807  1.00  0.00           H
ATOM   1533  HB3 ARG X  97     137.146 111.411 207.767  1.00  0.00           H
ATOM   1534  CG  ARG X  97     136.457 111.541 209.841  1.00  0.00           C
ATOM   1535  HG2 ARG X  97     136.075 110.917 210.650  1.00  0.00           H
ATOM   1536  HG3 ARG X  97     137.376 112.085 210.060  1.00  0.00           H
ATOM   1537  CD  ARG X  97     135.462 112.638 209.510  1.00  0.00           C
ATOM   1538  HD2 ARG X  97     135.715 113.146 208.579  1.00  0.00           H
ATOM   1539  HD3 ARG X  97     134.461 112.212 209.441  1.00  0.00           H
ATOM   1540  NE  ARG X  97     135.401 113.585 210.566  1.00  0.00           N
ATOM   1541  HE  ARG X  97     136.240 113.835 211.068  1.00  0.00           H
ATOM   1542  CZ  ARG X  97     134.280 114.329 210.726  1.00  0.00           C
ATOM   1543  NH1 ARG X  97     133.319 114.279 209.877  1.00  0.00           N
ATOM   1544 HH11 ARG X  97     133.285 113.969 208.916  1.00  0.00           H
ATOM   1545 HH12 ARG X  97     132.423 114.648 210.158  1.00  0.00           H
ATOM   1546  NH2 ARG X  97     134.138 115.123 211.715  1.00  0.00           N
ATOM   1547 HH21 ARG X  97     134.844 115.083 212.436  1.00  0.00           H
ATOM   1548 HH22 ARG X  97     133.234 115.573 211.743  1.00  0.00           H
ATOM   1549  C   ARG X  97     135.753 109.564 206.638  1.00  0.00           C
ATOM   1550  O   ARG X  97     136.505 108.718 206.312  1.00  0.00           O
ATOM   1551  N   GLY X  98     135.112 110.332 205.742  1.00  0.00           N
ATOM   1552  H   GLY X  98     134.891 111.230 206.149  1.00  0.00           H
ATOM   1553  CA  GLY X  98     135.225 110.243 204.247  1.00  0.00           C
ATOM   1554  HA2 GLY X  98     135.499 109.238 203.925  1.00  0.00           H
ATOM   1555  HA3 GLY X  98     134.215 110.483 203.916  1.00  0.00           H
ATOM   1556  C   GLY X  98     136.287 111.190 203.605  1.00  0.00           C
ATOM   1557  O   GLY X  98     135.901 111.943 202.685  1.00  0.00           O
ATOM   1558  N   HIE X  99     137.536 111.194 204.103  1.00  0.00           N
ATOM   1559  H   HIE X  99     137.829 110.431 204.696  1.00  0.00           H
ATOM   1560  CA  HIE X  99     138.487 112.239 203.767  1.00  0.00           C
ATOM   1561  HA  HIE X  99     137.906 113.146 203.603  1.00  0.00           H
ATOM   1562  CB  HIE X  99     139.433 112.472 204.961  1.00  0.00           C
ATOM   1563  HB2 HIE X  99     140.192 113.207 204.696  1.00  0.00           H
ATOM   1564  HB3 HIE X  99     138.726 112.940 205.646  1.00  0.00           H
ATOM   1565  CG  HIE X  99     140.172 111.265 205.581  1.00  0.00           C
ATOM   1566  ND1 HIE X  99     139.604 110.304 206.541  1.00  0.00           N
ATOM   1567  CE1 HIE X  99     140.535 109.332 206.647  1.00  0.00           C
ATOM   1568  HE1 HIE X  99     140.429 108.583 207.418  1.00  0.00           H
ATOM   1569  NE2 HIE X  99     141.590 109.595 205.926  1.00  0.00           N
ATOM   1570  HE2 HIE X  99     142.469 109.097 205.933  1.00  0.00           H
ATOM   1571  CD2 HIE X  99     141.396 110.722 205.201  1.00  0.00           C
ATOM   1572  HD2 HIE X  99     142.064 111.237 204.526  1.00  0.00           H
ATOM   1573  C   HIE X  99     139.377 111.959 202.531  1.00  0.00           C
ATOM   1574  O   HIE X  99     139.665 110.821 202.168  1.00  0.00           O
ATOM   1575  N   PHE X 100     139.996 113.001 202.027  1.00  0.00           N
ATOM   1576  H   PHE X 100     139.831 113.912 202.429  1.00  0.00           H
ATOM   1577  CA  PHE X 100     140.868 113.014 200.821  1.00  0.00           C
ATOM   1578  HA  PHE X 100     140.314 112.731 199.926  1.00  0.00           H
ATOM   1579  CB  PHE X 100     141.252 114.410 200.519  1.00  0.00           C
ATOM   1580  HB2 PHE X 100     141.716 114.878 201.387  1.00  0.00           H
ATOM   1581  HB3 PHE X 100     141.893 114.456 199.638  1.00  0.00           H
ATOM   1582  CG  PHE X 100     140.160 115.459 200.182  1.00  0.00           C
ATOM   1583  CD1 PHE X 100     140.514 116.815 200.271  1.00  0.00           C
ATOM   1584  HD1 PHE X 100     141.513 117.157 200.496  1.00  0.00           H
ATOM   1585  CE1 PHE X 100     139.537 117.810 199.947  1.00  0.00           C
ATOM   1586  HE1 PHE X 100     139.837 118.846 199.990  1.00  0.00           H
ATOM   1587  CZ  PHE X 100     138.262 117.459 199.556  1.00  0.00           C
ATOM   1588  HZ  PHE X 100     137.510 118.169 199.243  1.00  0.00           H
ATOM   1589  CE2 PHE X 100     137.936 116.103 199.472  1.00  0.00           C
ATOM   1590  HE2 PHE X 100     136.913 115.846 199.243  1.00  0.00           H
ATOM   1591  CD2 PHE X 100     138.835 115.106 199.808  1.00  0.00           C
ATOM   1592  HD2 PHE X 100     138.488 114.085 199.859  1.00  0.00           H
ATOM   1593  C   PHE X 100     142.074 112.080 201.037  1.00  0.00           C
ATOM   1594  O   PHE X 100     142.689 112.010 202.101  1.00  0.00           O
ATOM   1595  N   PRO X 101     142.544 111.410 200.011  1.00  0.00           N
ATOM   1596  CD  PRO X 101     141.811 111.053 198.768  1.00  0.00           C
ATOM   1597  HD2 PRO X 101     141.671 111.859 198.047  1.00  0.00           H
ATOM   1598  HD3 PRO X 101     140.770 110.791 198.956  1.00  0.00           H
ATOM   1599  CG  PRO X 101     142.606 109.953 198.164  1.00  0.00           C
ATOM   1600  HG2 PRO X 101     142.527 110.014 197.079  1.00  0.00           H
ATOM   1601  HG3 PRO X 101     142.306 109.011 198.623  1.00  0.00           H
ATOM   1602  CB  PRO X 101     144.081 110.124 198.638  1.00  0.00           C
ATOM   1603  HB2 PRO X 101     144.639 110.895 198.107  1.00  0.00           H
ATOM   1604  HB3 PRO X 101     144.683 109.215 198.652  1.00  0.00           H
ATOM   1605  CA  PRO X 101     143.845 110.691 200.039  1.00  0.00           C
ATOM   1606  HA  PRO X 101     143.790 109.830 200.705  1.00  0.00           H
ATOM   1607  C   PRO X 101     145.063 111.622 200.482  1.00  0.00           C
ATOM   1608  O   PRO X 101     146.009 111.057 201.066  1.00  0.00           O
ATOM   1609  N   LEU X 102     145.018 112.936 200.177  1.00  0.00           N
ATOM   1610  H   LEU X 102     144.338 113.259 199.502  1.00  0.00           H
ATOM   1611  CA  LEU X 102     145.871 113.984 200.806  1.00  0.00           C
ATOM   1612  HA  LEU X 102     146.870 113.821 200.400  1.00  0.00           H
ATOM   1613  CB  LEU X 102     145.350 115.325 200.188  1.00  0.00           C
ATOM   1614  HB2 LEU X 102     144.959 115.286 199.171  1.00  0.00           H
ATOM   1615  HB3 LEU X 102     144.467 115.476 200.809  1.00  0.00           H
ATOM   1616  CG  LEU X 102     146.288 116.531 200.307  1.00  0.00           C
ATOM   1617  HG  LEU X 102     147.243 116.248 199.863  1.00  0.00           H
ATOM   1618  CD1 LEU X 102     145.783 117.787 199.443  1.00  0.00           C
ATOM   1619 HD11 LEU X 102     146.300 118.702 199.731  1.00  0.00           H
ATOM   1620 HD12 LEU X 102     144.723 117.868 199.681  1.00  0.00           H
ATOM   1621 HD13 LEU X 102     145.859 117.575 198.377  1.00  0.00           H
ATOM   1622  CD2 LEU X 102     146.549 116.973 201.717  1.00  0.00           C
ATOM   1623 HD21 LEU X 102     147.068 117.931 201.761  1.00  0.00           H
ATOM   1624 HD22 LEU X 102     145.652 117.003 202.336  1.00  0.00           H
ATOM   1625 HD23 LEU X 102     147.269 116.294 202.174  1.00  0.00           H
ATOM   1626  C   LEU X 102     145.815 114.027 202.353  1.00  0.00           C
ATOM   1627  O   LEU X 102     146.848 113.832 202.952  1.00  0.00           O
ATOM   1628  N   ALA X 103     144.580 113.983 202.907  1.00  0.00           N
ATOM   1629  H   ALA X 103     143.793 114.078 202.280  1.00  0.00           H
ATOM   1630  CA  ALA X 103     144.381 113.918 204.349  1.00  0.00           C
ATOM   1631  HA  ALA X 103     144.751 114.773 204.914  1.00  0.00           H
ATOM   1632  CB  ALA X 103     142.880 113.951 204.648  1.00  0.00           C
ATOM   1633  HB1 ALA X 103     142.690 113.487 205.616  1.00  0.00           H
ATOM   1634  HB2 ALA X 103     142.272 113.568 203.829  1.00  0.00           H
ATOM   1635  HB3 ALA X 103     142.550 114.961 204.894  1.00  0.00           H
ATOM   1636  C   ALA X 103     144.987 112.562 204.928  1.00  0.00           C
ATOM   1637  O   ALA X 103     145.812 112.643 205.840  1.00  0.00           O
ATOM   1638  N   GLU X 104     144.756 111.457 204.300  1.00  0.00           N
ATOM   1639  H   GLU X 104     144.006 111.478 203.623  1.00  0.00           H
ATOM   1640  CA  GLU X 104     145.376 110.151 204.719  1.00  0.00           C
ATOM   1641  HA  GLU X 104     145.008 109.817 205.688  1.00  0.00           H
ATOM   1642  CB  GLU X 104     144.791 109.130 203.760  1.00  0.00           C
ATOM   1643  HB2 GLU X 104     143.712 109.262 203.836  1.00  0.00           H
ATOM   1644  HB3 GLU X 104     145.127 109.297 202.737  1.00  0.00           H
ATOM   1645  CG  GLU X 104     145.157 107.720 203.939  1.00  0.00           C
ATOM   1646  HG2 GLU X 104     144.663 107.140 203.160  1.00  0.00           H
ATOM   1647  HG3 GLU X 104     146.225 107.563 203.788  1.00  0.00           H
ATOM   1648  CD  GLU X 104     144.737 107.323 205.323  1.00  0.00           C
ATOM   1649  OE1 GLU X 104     145.397 106.360 205.810  1.00  0.00           O
ATOM   1650  OE2 GLU X 104     143.739 107.788 205.860  1.00  0.00           O
ATOM   1651  C   GLU X 104     146.867 110.174 204.744  1.00  0.00           C
ATOM   1652  O   GLU X 104     147.444 109.560 205.655  1.00  0.00           O
ATOM   1653  N   ARG X 105     147.488 110.836 203.776  1.00  0.00           N
ATOM   1654  H   ARG X 105     146.859 111.277 203.120  1.00  0.00           H
ATOM   1655  CA  ARG X 105     148.937 110.889 203.582  1.00  0.00           C
ATOM   1656  HA  ARG X 105     149.371 109.898 203.720  1.00  0.00           H
ATOM   1657  CB  ARG X 105     149.262 111.368 202.114  1.00  0.00           C
ATOM   1658  HB2 ARG X 105     148.811 110.740 201.347  1.00  0.00           H
ATOM   1659  HB3 ARG X 105     148.753 112.326 202.001  1.00  0.00           H
ATOM   1660  CG  ARG X 105     150.737 111.553 201.787  1.00  0.00           C
ATOM   1661  HG2 ARG X 105     150.822 112.127 200.864  1.00  0.00           H
ATOM   1662  HG3 ARG X 105     151.223 112.220 202.499  1.00  0.00           H
ATOM   1663  CD  ARG X 105     151.515 110.257 201.775  1.00  0.00           C
ATOM   1664  HD2 ARG X 105     152.558 110.572 201.811  1.00  0.00           H
ATOM   1665  HD3 ARG X 105     151.379 109.664 202.679  1.00  0.00           H
ATOM   1666  NE  ARG X 105     151.170 109.359 200.614  1.00  0.00           N
ATOM   1667  HE  ARG X 105     150.337 108.800 200.729  1.00  0.00           H
ATOM   1668  CZ  ARG X 105     151.828 109.314 199.449  1.00  0.00           C
ATOM   1669  NH1 ARG X 105     152.984 109.975 199.311  1.00  0.00           N
ATOM   1670 HH11 ARG X 105     153.373 110.428 200.126  1.00  0.00           H
ATOM   1671 HH12 ARG X 105     153.533 109.802 198.481  1.00  0.00           H
ATOM   1672  NH2 ARG X 105     151.401 108.508 198.597  1.00  0.00           N
ATOM   1673 HH21 ARG X 105     150.482 108.090 198.623  1.00  0.00           H
ATOM   1674 HH22 ARG X 105     151.810 108.577 197.676  1.00  0.00           H
ATOM   1675  C   ARG X 105     149.536 111.804 204.623  1.00  0.00           C
ATOM   1676  O   ARG X 105     150.579 111.357 205.054  1.00  0.00           O
ATOM   1677  N   ALA X 106     148.844 112.947 204.960  1.00  0.00           N
ATOM   1678  H   ALA X 106     148.115 113.242 204.326  1.00  0.00           H
ATOM   1679  CA  ALA X 106     149.363 113.932 205.925  1.00  0.00           C
ATOM   1680  HA  ALA X 106     150.428 114.033 205.717  1.00  0.00           H
ATOM   1681  CB  ALA X 106     148.621 115.250 205.721  1.00  0.00           C
ATOM   1682  HB1 ALA X 106     148.591 115.554 204.675  1.00  0.00           H
ATOM   1683  HB2 ALA X 106     149.178 116.046 206.215  1.00  0.00           H
ATOM   1684  HB3 ALA X 106     147.586 115.269 206.063  1.00  0.00           H
ATOM   1685  C   ALA X 106     149.164 113.613 207.406  1.00  0.00           C
ATOM   1686  O   ALA X 106     150.122 113.854 208.158  1.00  0.00           O
ATOM   1687  N   ASN X 107     148.016 113.106 207.840  1.00  0.00           N
ATOM   1688  H   ASN X 107     147.375 112.757 207.142  1.00  0.00           H
ATOM   1689  CA  ASN X 107     147.793 112.760 209.204  1.00  0.00           C
ATOM   1690  HA  ASN X 107     148.334 113.430 209.872  1.00  0.00           H
ATOM   1691  CB  ASN X 107     146.311 113.175 209.583  1.00  0.00           C
ATOM   1692  HB2 ASN X 107     146.387 113.387 210.649  1.00  0.00           H
ATOM   1693  HB3 ASN X 107     145.961 114.011 208.978  1.00  0.00           H
ATOM   1694  CG  ASN X 107     145.270 112.120 209.301  1.00  0.00           C
ATOM   1695  OD1 ASN X 107     145.451 111.250 208.474  1.00  0.00           O
ATOM   1696  ND2 ASN X 107     144.172 112.049 209.979  1.00  0.00           N
ATOM   1697 HD21 ASN X 107     144.069 112.820 210.623  1.00  0.00           H
ATOM   1698 HD22 ASN X 107     143.466 111.382 209.701  1.00  0.00           H
ATOM   1699  C   ASN X 107     148.199 111.357 209.558  1.00  0.00           C
ATOM   1700  O   ASN X 107     148.401 111.115 210.746  1.00  0.00           O
ATOM   1701  N   ARG X 108     148.162 110.362 208.621  1.00  0.00           N
ATOM   1702  H   ARG X 108     147.602 110.477 207.787  1.00  0.00           H
ATOM   1703  CA  ARG X 108     148.531 108.964 209.099  1.00  0.00           C
ATOM   1704  HA  ARG X 108     148.302 108.223 208.333  1.00  0.00           H
ATOM   1705  CB  ARG X 108     150.050 108.766 209.468  1.00  0.00           C
ATOM   1706  HB2 ARG X 108     150.291 109.435 210.294  1.00  0.00           H
ATOM   1707  HB3 ARG X 108     150.180 107.702 209.663  1.00  0.00           H
ATOM   1708  CG  ARG X 108     151.036 109.162 208.301  1.00  0.00           C
ATOM   1709  HG2 ARG X 108     151.948 108.589 208.470  1.00  0.00           H
ATOM   1710  HG3 ARG X 108     150.642 108.983 207.301  1.00  0.00           H
ATOM   1711  CD  ARG X 108     151.498 110.671 208.304  1.00  0.00           C
ATOM   1712  HD2 ARG X 108     151.857 110.931 207.308  1.00  0.00           H
ATOM   1713  HD3 ARG X 108     150.638 111.286 208.571  1.00  0.00           H
ATOM   1714  NE  ARG X 108     152.624 110.846 209.217  1.00  0.00           N
ATOM   1715  HE  ARG X 108     153.041 110.032 209.646  1.00  0.00           H
ATOM   1716  CZ  ARG X 108     153.206 112.013 209.486  1.00  0.00           C
ATOM   1717  NH1 ARG X 108     152.623 113.125 209.101  1.00  0.00           N
ATOM   1718 HH11 ARG X 108     151.730 113.183 208.632  1.00  0.00           H
ATOM   1719 HH12 ARG X 108     153.041 114.005 209.367  1.00  0.00           H
ATOM   1720  NH2 ARG X 108     154.277 112.053 210.121  1.00  0.00           N
ATOM   1721 HH21 ARG X 108     154.664 111.129 210.247  1.00  0.00           H
ATOM   1722 HH22 ARG X 108     154.817 112.879 210.335  1.00  0.00           H
ATOM   1723  C   ARG X 108     147.528 108.436 210.175  1.00  0.00           C
ATOM   1724  O   ARG X 108     147.767 107.557 210.987  1.00  0.00           O
ATOM   1725  N   GLY X 109     146.340 109.086 210.193  1.00  0.00           N
ATOM   1726  H   GLY X 109     146.147 109.796 209.501  1.00  0.00           H
ATOM   1727  CA  GLY X 109     145.281 108.869 211.145  1.00  0.00           C
ATOM   1728  HA2 GLY X 109     144.364 109.237 210.685  1.00  0.00           H
ATOM   1729  HA3 GLY X 109     145.170 107.788 211.230  1.00  0.00           H
ATOM   1730  C   GLY X 109     145.473 109.471 212.556  1.00  0.00           C
ATOM   1731  O   GLY X 109     144.726 109.165 213.508  1.00  0.00           O
ATOM   1732  N   PHE X 110     146.600 110.158 212.833  1.00  0.00           N
ATOM   1733  H   PHE X 110     147.286 110.202 212.093  1.00  0.00           H
ATOM   1734  CA  PHE X 110     146.809 110.939 214.072  1.00  0.00           C
ATOM   1735  HA  PHE X 110     146.591 110.314 214.938  1.00  0.00           H
ATOM   1736  CB  PHE X 110     148.259 111.267 214.262  1.00  0.00           C
ATOM   1737  HB2 PHE X 110     148.455 111.935 213.424  1.00  0.00           H
ATOM   1738  HB3 PHE X 110     148.362 111.736 215.240  1.00  0.00           H
ATOM   1739  CG  PHE X 110     149.173 110.067 214.196  1.00  0.00           C
ATOM   1740  CD1 PHE X 110     149.244 109.111 215.191  1.00  0.00           C
ATOM   1741  HD1 PHE X 110     148.560 109.140 216.027  1.00  0.00           H
ATOM   1742  CE1 PHE X 110     150.010 107.946 215.107  1.00  0.00           C
ATOM   1743  HE1 PHE X 110     149.875 107.146 215.819  1.00  0.00           H
ATOM   1744  CZ  PHE X 110     150.885 107.773 214.000  1.00  0.00           C
ATOM   1745  HZ  PHE X 110     151.486 106.880 213.903  1.00  0.00           H
ATOM   1746  CE2 PHE X 110     150.866 108.737 212.950  1.00  0.00           C
ATOM   1747  HE2 PHE X 110     151.430 108.492 212.061  1.00  0.00           H
ATOM   1748  CD2 PHE X 110     150.069 109.915 213.148  1.00  0.00           C
ATOM   1749  HD2 PHE X 110     150.102 110.657 212.365  1.00  0.00           H
ATOM   1750  C   PHE X 110     145.894 112.118 214.220  1.00  0.00           C
ATOM   1751  O   PHE X 110     145.131 112.428 213.311  1.00  0.00           O
ATOM   1752  N   GLY X 111     146.010 112.860 215.339  1.00  0.00           N
ATOM   1753  H   GLY X 111     146.711 112.610 216.022  1.00  0.00           H
ATOM   1754  CA  GLY X 111     145.211 114.095 215.575  1.00  0.00           C
ATOM   1755  HA2 GLY X 111     145.669 114.687 216.367  1.00  0.00           H
ATOM   1756  HA3 GLY X 111     145.120 114.665 214.651  1.00  0.00           H
ATOM   1757  C   GLY X 111     143.773 113.769 215.917  1.00  0.00           C
ATOM   1758  O   GLY X 111     143.541 112.860 216.750  1.00  0.00           O
ATOM   1759  N   ILE X 112     142.727 114.548 215.506  1.00  0.00           N
ATOM   1760  H   ILE X 112     142.947 115.339 214.918  1.00  0.00           H
ATOM   1761  CA  ILE X 112     141.358 114.383 215.866  1.00  0.00           C
ATOM   1762  HA  ILE X 112     141.275 113.370 216.261  1.00  0.00           H
ATOM   1763  CB  ILE X 112     140.864 115.526 216.776  1.00  0.00           C
ATOM   1764  HB  ILE X 112     140.929 116.454 216.206  1.00  0.00           H
ATOM   1765  CG2 ILE X 112     139.396 115.269 217.150  1.00  0.00           C
ATOM   1766 HG21 ILE X 112     138.674 115.224 216.335  1.00  0.00           H
ATOM   1767 HG22 ILE X 112     139.005 115.985 217.873  1.00  0.00           H
ATOM   1768 HG23 ILE X 112     139.356 114.412 217.822  1.00  0.00           H
ATOM   1769  CG1 ILE X 112     141.727 115.801 218.000  1.00  0.00           C
ATOM   1770 HG12 ILE X 112     141.706 114.878 218.580  1.00  0.00           H
ATOM   1771 HG13 ILE X 112     142.732 116.035 217.651  1.00  0.00           H
ATOM   1772  CD1 ILE X 112     141.251 116.895 218.893  1.00  0.00           C
ATOM   1773 HD11 ILE X 112     140.926 117.754 218.306  1.00  0.00           H
ATOM   1774 HD12 ILE X 112     142.084 117.123 219.558  1.00  0.00           H
ATOM   1775 HD13 ILE X 112     140.414 116.481 219.455  1.00  0.00           H
ATOM   1776  C   ILE X 112     140.518 114.341 214.575  1.00  0.00           C
ATOM   1777  O   ILE X 112     139.806 113.390 214.367  1.00  0.00           O
ATOM   1778  N   VAL X 113     140.616 115.320 213.731  1.00  0.00           N
ATOM   1779  H   VAL X 113     141.448 115.888 213.804  1.00  0.00           H
ATOM   1780  CA  VAL X 113     139.563 115.740 212.760  1.00  0.00           C
ATOM   1781  HA  VAL X 113     138.607 115.840 213.273  1.00  0.00           H
ATOM   1782  CB  VAL X 113     139.996 117.092 212.093  1.00  0.00           C
ATOM   1783  HB  VAL X 113     141.043 117.021 211.797  1.00  0.00           H
ATOM   1784  CG1 VAL X 113     139.252 117.695 210.911  1.00  0.00           C
ATOM   1785 HG11 VAL X 113     139.692 118.662 210.665  1.00  0.00           H
ATOM   1786 HG12 VAL X 113     139.544 117.069 210.068  1.00  0.00           H
ATOM   1787 HG13 VAL X 113     138.162 117.694 210.936  1.00  0.00           H
ATOM   1788  CG2 VAL X 113     140.084 118.134 213.176  1.00  0.00           C
ATOM   1789 HG21 VAL X 113     140.574 119.043 212.829  1.00  0.00           H
ATOM   1790 HG22 VAL X 113     140.641 117.760 214.036  1.00  0.00           H
ATOM   1791 HG23 VAL X 113     139.057 118.318 213.492  1.00  0.00           H
ATOM   1792  C   VAL X 113     139.381 114.663 211.676  1.00  0.00           C
ATOM   1793  O   VAL X 113     138.266 114.259 211.325  1.00  0.00           O
ATOM   1794  N   PHE X 114     140.477 114.032 211.174  1.00  0.00           N
ATOM   1795  H   PHE X 114     141.393 114.340 211.468  1.00  0.00           H
ATOM   1796  CA  PHE X 114     140.478 112.910 210.216  1.00  0.00           C
ATOM   1797  HA  PHE X 114     139.458 112.526 210.205  1.00  0.00           H
ATOM   1798  CB  PHE X 114     140.810 113.305 208.776  1.00  0.00           C
ATOM   1799  HB2 PHE X 114     141.860 113.568 208.905  1.00  0.00           H
ATOM   1800  HB3 PHE X 114     140.760 112.434 208.123  1.00  0.00           H
ATOM   1801  CG  PHE X 114     140.120 114.364 208.035  1.00  0.00           C
ATOM   1802  CD1 PHE X 114     138.707 114.387 207.909  1.00  0.00           C
ATOM   1803  HD1 PHE X 114     138.087 113.705 208.472  1.00  0.00           H
ATOM   1804  CE1 PHE X 114     138.076 115.297 207.040  1.00  0.00           C
ATOM   1805  HE1 PHE X 114     137.075 114.975 206.793  1.00  0.00           H
ATOM   1806  CZ  PHE X 114     138.857 116.256 206.334  1.00  0.00           C
ATOM   1807  HZ  PHE X 114     138.351 116.943 205.672  1.00  0.00           H
ATOM   1808  CE2 PHE X 114     140.236 116.275 206.510  1.00  0.00           C
ATOM   1809  HE2 PHE X 114     140.759 117.108 206.064  1.00  0.00           H
ATOM   1810  CD2 PHE X 114     140.859 115.345 207.332  1.00  0.00           C
ATOM   1811  HD2 PHE X 114     141.920 115.395 207.526  1.00  0.00           H
ATOM   1812  C   PHE X 114     141.162 111.752 210.913  1.00  0.00           C
ATOM   1813  O   PHE X 114     141.736 110.845 210.261  1.00  0.00           O
ATOM   1814  N   SER X 115     141.179 111.699 212.245  1.00  0.00           N
ATOM   1815  H   SER X 115     140.661 112.386 212.775  1.00  0.00           H
ATOM   1816  CA  SER X 115     141.491 110.457 212.994  1.00  0.00           C
ATOM   1817  HA  SER X 115     142.178 109.894 212.361  1.00  0.00           H
ATOM   1818  CB  SER X 115     142.089 110.816 214.337  1.00  0.00           C
ATOM   1819  HB2 SER X 115     142.866 111.581 214.334  1.00  0.00           H
ATOM   1820  HB3 SER X 115     141.304 111.174 215.004  1.00  0.00           H
ATOM   1821  OG  SER X 115     142.682 109.663 214.859  1.00  0.00           O
ATOM   1822  HG  SER X 115     143.522 109.649 214.395  1.00  0.00           H
ATOM   1823  C   SER X 115     140.338 109.551 213.124  1.00  0.00           C
ATOM   1824  O   SER X 115     139.175 109.976 213.148  1.00  0.00           O
ATOM   1825  N   ASN X 116     140.494 108.269 212.899  1.00  0.00           N
ATOM   1826  H   ASN X 116     141.298 107.881 212.427  1.00  0.00           H
ATOM   1827  CA  ASN X 116     139.486 107.169 213.147  1.00  0.00           C
ATOM   1828  HA  ASN X 116     138.571 107.702 213.404  1.00  0.00           H
ATOM   1829  CB  ASN X 116     139.176 106.497 211.737  1.00  0.00           C
ATOM   1830  HB2 ASN X 116     140.062 106.145 211.209  1.00  0.00           H
ATOM   1831  HB3 ASN X 116     138.442 105.700 211.851  1.00  0.00           H
ATOM   1832  CG  ASN X 116     138.594 107.440 210.712  1.00  0.00           C
ATOM   1833  OD1 ASN X 116     137.428 107.761 210.816  1.00  0.00           O
ATOM   1834  ND2 ASN X 116     139.294 107.860 209.661  1.00  0.00           N
ATOM   1835 HD21 ASN X 116     140.214 107.453 209.568  1.00  0.00           H
ATOM   1836 HD22 ASN X 116     138.782 108.506 209.077  1.00  0.00           H
ATOM   1837  C   ASN X 116     139.870 106.213 214.299  1.00  0.00           C
ATOM   1838  O   ASN X 116     141.071 106.184 214.620  1.00  0.00           O
ATOM   1839  N   GLY X 117     138.932 105.597 214.972  1.00  0.00           N
ATOM   1840  H   GLY X 117     137.985 105.801 214.688  1.00  0.00           H
ATOM   1841  CA  GLY X 117     139.178 104.420 215.817  1.00  0.00           C
ATOM   1842  HA2 GLY X 117     138.270 103.847 216.001  1.00  0.00           H
ATOM   1843  HA3 GLY X 117     139.764 103.685 215.266  1.00  0.00           H
ATOM   1844  C   GLY X 117     139.783 104.772 217.261  1.00  0.00           C
ATOM   1845  O   GLY X 117     139.662 105.921 217.732  1.00  0.00           O
ATOM   1846  N   LYS X 118     140.468 103.852 217.848  1.00  0.00           N
ATOM   1847  H   LYS X 118     140.484 102.950 217.392  1.00  0.00           H
ATOM   1848  CA  LYS X 118     141.100 103.907 219.170  1.00  0.00           C
ATOM   1849  HA  LYS X 118     140.340 104.136 219.917  1.00  0.00           H
ATOM   1850  CB  LYS X 118     141.808 102.566 219.350  1.00  0.00           C
ATOM   1851  HB2 LYS X 118     141.102 101.761 219.147  1.00  0.00           H
ATOM   1852  HB3 LYS X 118     142.573 102.456 218.581  1.00  0.00           H
ATOM   1853  CG  LYS X 118     142.180 102.405 220.856  1.00  0.00           C
ATOM   1854  HG2 LYS X 118     142.774 103.292 221.079  1.00  0.00           H
ATOM   1855  HG3 LYS X 118     141.251 102.403 221.425  1.00  0.00           H
ATOM   1856  CD  LYS X 118     143.018 101.141 221.157  1.00  0.00           C
ATOM   1857  HD2 LYS X 118     142.303 100.343 220.958  1.00  0.00           H
ATOM   1858  HD3 LYS X 118     143.921 101.053 220.554  1.00  0.00           H
ATOM   1859  CE  LYS X 118     143.511 101.277 222.631  1.00  0.00           C
ATOM   1860  HE2 LYS X 118     143.498 102.355 222.793  1.00  0.00           H
ATOM   1861  HE3 LYS X 118     142.757 100.862 223.300  1.00  0.00           H
ATOM   1862  NZ  LYS X 118     144.823 100.752 222.820  1.00  0.00           N
ATOM   1863  HZ1 LYS X 118     145.164 100.910 223.757  1.00  0.00           H
ATOM   1864  HZ2 LYS X 118     145.508 101.157 222.197  1.00  0.00           H
ATOM   1865  HZ3 LYS X 118     144.770  99.774 222.575  1.00  0.00           H
ATOM   1866  C   LYS X 118     142.081 105.100 219.351  1.00  0.00           C
ATOM   1867  O   LYS X 118     142.108 105.749 220.402  1.00  0.00           O
ATOM   1868  N   ARG X 119     142.863 105.371 218.281  1.00  0.00           N
ATOM   1869  H   ARG X 119     142.750 104.800 217.456  1.00  0.00           H
ATOM   1870  CA  ARG X 119     143.701 106.560 218.129  1.00  0.00           C
ATOM   1871  HA  ARG X 119     144.489 106.523 218.882  1.00  0.00           H
ATOM   1872  CB  ARG X 119     144.433 106.310 216.843  1.00  0.00           C
ATOM   1873  HB2 ARG X 119     144.946 105.368 217.040  1.00  0.00           H
ATOM   1874  HB3 ARG X 119     143.680 106.228 216.060  1.00  0.00           H
ATOM   1875  CG  ARG X 119     145.425 107.311 216.371  1.00  0.00           C
ATOM   1876  HG2 ARG X 119     144.917 108.244 216.127  1.00  0.00           H
ATOM   1877  HG3 ARG X 119     146.217 107.450 217.107  1.00  0.00           H
ATOM   1878  CD  ARG X 119     146.242 106.929 215.047  1.00  0.00           C
ATOM   1879  HD2 ARG X 119     145.549 106.860 214.208  1.00  0.00           H
ATOM   1880  HD3 ARG X 119     147.003 107.696 214.902  1.00  0.00           H
ATOM   1881  NE  ARG X 119     147.056 105.763 215.165  1.00  0.00           N
ATOM   1882  HE  ARG X 119     147.070 105.149 215.967  1.00  0.00           H
ATOM   1883  CZ  ARG X 119     148.028 105.404 214.316  1.00  0.00           C
ATOM   1884  NH1 ARG X 119     148.877 104.511 214.586  1.00  0.00           N
ATOM   1885 HH11 ARG X 119     148.839 104.230 215.555  1.00  0.00           H
ATOM   1886 HH12 ARG X 119     149.599 104.345 213.899  1.00  0.00           H
ATOM   1887  NH2 ARG X 119     148.256 105.893 213.145  1.00  0.00           N
ATOM   1888 HH21 ARG X 119     147.647 106.627 212.814  1.00  0.00           H
ATOM   1889 HH22 ARG X 119     148.887 105.456 212.488  1.00  0.00           H
ATOM   1890  C   ARG X 119     142.895 107.905 218.235  1.00  0.00           C
ATOM   1891  O   ARG X 119     143.446 108.833 218.850  1.00  0.00           O
ATOM   1892  N   TRP X 120     141.679 107.974 217.687  1.00  0.00           N
ATOM   1893  H   TRP X 120     141.349 107.286 217.025  1.00  0.00           H
ATOM   1894  CA  TRP X 120     140.773 109.105 217.774  1.00  0.00           C
ATOM   1895  HA  TRP X 120     141.309 110.036 217.591  1.00  0.00           H
ATOM   1896  CB  TRP X 120     139.687 108.969 216.719  1.00  0.00           C
ATOM   1897  HB2 TRP X 120     140.216 109.199 215.794  1.00  0.00           H
ATOM   1898  HB3 TRP X 120     139.493 107.929 216.456  1.00  0.00           H
ATOM   1899  CG  TRP X 120     138.419 109.832 216.859  1.00  0.00           C
ATOM   1900  CD1 TRP X 120     138.452 111.213 216.747  1.00  0.00           C
ATOM   1901  HD1 TRP X 120     139.298 111.863 216.581  1.00  0.00           H
ATOM   1902  NE1 TRP X 120     137.250 111.726 217.035  1.00  0.00           N
ATOM   1903  HE1 TRP X 120     137.122 112.716 216.877  1.00  0.00           H
ATOM   1904  CE2 TRP X 120     136.268 110.750 216.919  1.00  0.00           C
ATOM   1905  CZ2 TRP X 120     134.872 110.835 216.945  1.00  0.00           C
ATOM   1906  HZ2 TRP X 120     134.388 111.789 217.093  1.00  0.00           H
ATOM   1907  CH2 TRP X 120     134.168 109.670 217.081  1.00  0.00           C
ATOM   1908  HH2 TRP X 120     133.094 109.762 217.149  1.00  0.00           H
ATOM   1909  CZ3 TRP X 120     134.819 108.409 217.153  1.00  0.00           C
ATOM   1910  HZ3 TRP X 120     134.221 107.530 217.345  1.00  0.00           H
ATOM   1911  CE3 TRP X 120     136.205 108.301 217.037  1.00  0.00           C
ATOM   1912  HE3 TRP X 120     136.732 107.367 216.910  1.00  0.00           H
ATOM   1913  CD2 TRP X 120     136.973 109.499 216.982  1.00  0.00           C
ATOM   1914  C   TRP X 120     140.080 109.282 219.130  1.00  0.00           C
ATOM   1915  O   TRP X 120     139.855 110.390 219.669  1.00  0.00           O
ATOM   1916  N   LYS X 121     139.558 108.150 219.653  1.00  0.00           N
ATOM   1917  H   LYS X 121     139.767 107.330 219.102  1.00  0.00           H
ATOM   1918  CA  LYS X 121     138.849 107.980 220.942  1.00  0.00           C
ATOM   1919  HA  LYS X 121     137.964 108.606 221.056  1.00  0.00           H
ATOM   1920  CB  LYS X 121     138.441 106.516 221.063  1.00  0.00           C
ATOM   1921  HB2 LYS X 121     139.207 105.774 220.838  1.00  0.00           H
ATOM   1922  HB3 LYS X 121     138.083 106.342 222.078  1.00  0.00           H
ATOM   1923  CG  LYS X 121     137.260 106.297 220.110  1.00  0.00           C
ATOM   1924  HG2 LYS X 121     136.520 107.071 220.317  1.00  0.00           H
ATOM   1925  HG3 LYS X 121     137.464 106.363 219.042  1.00  0.00           H
ATOM   1926  CD  LYS X 121     136.656 104.901 220.273  1.00  0.00           C
ATOM   1927  HD2 LYS X 121     137.353 104.140 219.922  1.00  0.00           H
ATOM   1928  HD3 LYS X 121     136.216 104.832 221.268  1.00  0.00           H
ATOM   1929  CE  LYS X 121     135.498 104.633 219.277  1.00  0.00           C
ATOM   1930  HE2 LYS X 121     134.824 105.486 219.200  1.00  0.00           H
ATOM   1931  HE3 LYS X 121     135.900 104.404 218.290  1.00  0.00           H
ATOM   1932  NZ  LYS X 121     134.674 103.443 219.571  1.00  0.00           N
ATOM   1933  HZ1 LYS X 121     134.044 103.696 220.319  1.00  0.00           H
ATOM   1934  HZ2 LYS X 121     135.223 102.679 219.939  1.00  0.00           H
ATOM   1935  HZ3 LYS X 121     134.048 103.103 218.854  1.00  0.00           H
ATOM   1936  C   LYS X 121     139.749 108.450 222.091  1.00  0.00           C
ATOM   1937  O   LYS X 121     139.423 109.349 222.877  1.00  0.00           O
ATOM   1938  N   GLU X 122     141.010 107.944 222.208  1.00  0.00           N
ATOM   1939  H   GLU X 122     141.305 107.242 221.545  1.00  0.00           H
ATOM   1940  CA  GLU X 122     142.081 108.299 223.142  1.00  0.00           C
ATOM   1941  HA  GLU X 122     141.819 108.184 224.194  1.00  0.00           H
ATOM   1942  CB  GLU X 122     143.350 107.496 222.870  1.00  0.00           C
ATOM   1943  HB2 GLU X 122     143.739 107.448 221.853  1.00  0.00           H
ATOM   1944  HB3 GLU X 122     144.170 108.000 223.382  1.00  0.00           H
ATOM   1945  CG  GLU X 122     143.296 106.047 223.400  1.00  0.00           C
ATOM   1946  HG2 GLU X 122     142.242 105.771 223.367  1.00  0.00           H
ATOM   1947  HG3 GLU X 122     143.891 105.354 222.804  1.00  0.00           H
ATOM   1948  CD  GLU X 122     143.651 105.865 224.861  1.00  0.00           C
ATOM   1949  OE1 GLU X 122     143.912 104.676 225.275  1.00  0.00           O
ATOM   1950  OE2 GLU X 122     143.502 106.826 225.691  1.00  0.00           O
ATOM   1951  C   GLU X 122     142.408 109.811 223.071  1.00  0.00           C
ATOM   1952  O   GLU X 122     142.263 110.408 224.155  1.00  0.00           O
ATOM   1953  N   ILE X 123     142.774 110.410 221.945  1.00  0.00           N
ATOM   1954  H   ILE X 123     142.830 109.790 221.149  1.00  0.00           H
ATOM   1955  CA  ILE X 123     143.087 111.844 221.841  1.00  0.00           C
ATOM   1956  HA  ILE X 123     143.711 112.022 222.717  1.00  0.00           H
ATOM   1957  CB  ILE X 123     143.878 112.215 220.524  1.00  0.00           C
ATOM   1958  HB  ILE X 123     143.220 111.848 219.736  1.00  0.00           H
ATOM   1959  CG2 ILE X 123     144.125 113.771 220.232  1.00  0.00           C
ATOM   1960 HG21 ILE X 123     144.837 114.252 220.904  1.00  0.00           H
ATOM   1961 HG22 ILE X 123     143.241 114.394 220.364  1.00  0.00           H
ATOM   1962 HG23 ILE X 123     144.483 113.915 219.213  1.00  0.00           H
ATOM   1963  CG1 ILE X 123     145.237 111.565 220.377  1.00  0.00           C
ATOM   1964 HG12 ILE X 123     145.133 110.485 220.280  1.00  0.00           H
ATOM   1965 HG13 ILE X 123     145.654 112.003 219.470  1.00  0.00           H
ATOM   1966  CD1 ILE X 123     146.299 111.864 221.449  1.00  0.00           C
ATOM   1967 HD11 ILE X 123     145.885 111.496 222.388  1.00  0.00           H
ATOM   1968 HD12 ILE X 123     146.499 112.935 221.483  1.00  0.00           H
ATOM   1969 HD13 ILE X 123     147.180 111.237 221.313  1.00  0.00           H
ATOM   1970  C   ILE X 123     141.887 112.768 221.988  1.00  0.00           C
ATOM   1971  O   ILE X 123     141.912 113.752 222.685  1.00  0.00           O
ATOM   1972  N   ARG X 124     140.687 112.431 221.384  1.00  0.00           N
ATOM   1973  H   ARG X 124     140.605 111.536 220.923  1.00  0.00           H
ATOM   1974  CA  ARG X 124     139.528 113.292 221.620  1.00  0.00           C
ATOM   1975  HA  ARG X 124     139.753 114.324 221.350  1.00  0.00           H
ATOM   1976  CB  ARG X 124     138.450 112.901 220.588  1.00  0.00           C
ATOM   1977  HB2 ARG X 124     138.863 112.831 219.582  1.00  0.00           H
ATOM   1978  HB3 ARG X 124     138.176 111.899 220.919  1.00  0.00           H
ATOM   1979  CG  ARG X 124     137.339 113.845 220.459  1.00  0.00           C
ATOM   1980  HG2 ARG X 124     136.990 114.067 221.468  1.00  0.00           H
ATOM   1981  HG3 ARG X 124     137.690 114.813 220.102  1.00  0.00           H
ATOM   1982  CD  ARG X 124     136.171 113.339 219.591  1.00  0.00           C
ATOM   1983  HD2 ARG X 124     136.543 113.468 218.574  1.00  0.00           H
ATOM   1984  HD3 ARG X 124     136.053 112.261 219.703  1.00  0.00           H
ATOM   1985  NE  ARG X 124     134.845 113.888 219.852  1.00  0.00           N
ATOM   1986  HE  ARG X 124     134.489 113.816 220.794  1.00  0.00           H
ATOM   1987  CZ  ARG X 124     134.075 114.645 219.091  1.00  0.00           C
ATOM   1988  NH1 ARG X 124     134.476 115.028 217.862  1.00  0.00           N
ATOM   1989 HH11 ARG X 124     135.326 114.688 217.434  1.00  0.00           H
ATOM   1990 HH12 ARG X 124     134.008 115.817 217.439  1.00  0.00           H
ATOM   1991  NH2 ARG X 124     132.962 115.061 219.613  1.00  0.00           N
ATOM   1992 HH21 ARG X 124     132.718 114.752 220.543  1.00  0.00           H
ATOM   1993 HH22 ARG X 124     132.402 115.759 219.146  1.00  0.00           H
ATOM   1994  C   ARG X 124     138.940 113.346 223.037  1.00  0.00           C
ATOM   1995  O   ARG X 124     138.565 114.430 223.378  1.00  0.00           O
ATOM   1996  N   ARG X 125     138.999 112.305 223.904  1.00  0.00           N
ATOM   1997  H   ARG X 125     139.331 111.425 223.535  1.00  0.00           H
ATOM   1998  CA  ARG X 125     138.531 112.330 225.278  1.00  0.00           C
ATOM   1999  HA  ARG X 125     137.603 112.901 225.271  1.00  0.00           H
ATOM   2000  CB  ARG X 125     138.221 110.890 225.697  1.00  0.00           C
ATOM   2001  HB2 ARG X 125     137.517 110.841 226.527  1.00  0.00           H
ATOM   2002  HB3 ARG X 125     137.714 110.403 224.865  1.00  0.00           H
ATOM   2003  CG  ARG X 125     139.506 110.119 226.090  1.00  0.00           C
ATOM   2004  HG2 ARG X 125     140.297 110.157 225.341  1.00  0.00           H
ATOM   2005  HG3 ARG X 125     139.947 110.482 227.018  1.00  0.00           H
ATOM   2006  CD  ARG X 125     139.068 108.609 226.245  1.00  0.00           C
ATOM   2007  HD2 ARG X 125     138.308 108.582 227.026  1.00  0.00           H
ATOM   2008  HD3 ARG X 125     138.638 108.262 225.306  1.00  0.00           H
ATOM   2009  NE  ARG X 125     140.284 107.765 226.562  1.00  0.00           N
ATOM   2010  HE  ARG X 125     141.157 108.270 226.609  1.00  0.00           H
ATOM   2011  CZ  ARG X 125     140.204 106.490 226.877  1.00  0.00           C
ATOM   2012  NH1 ARG X 125     139.040 105.884 226.938  1.00  0.00           N
ATOM   2013 HH11 ARG X 125     138.190 106.420 226.837  1.00  0.00           H
ATOM   2014 HH12 ARG X 125     138.988 104.996 227.417  1.00  0.00           H
ATOM   2015  NH2 ARG X 125     141.238 105.765 227.040  1.00  0.00           N
ATOM   2016 HH21 ARG X 125     142.157 106.164 226.912  1.00  0.00           H
ATOM   2017 HH22 ARG X 125     141.116 104.764 227.094  1.00  0.00           H
ATOM   2018  C   ARG X 125     139.534 113.149 226.147  1.00  0.00           C
ATOM   2019  O   ARG X 125     139.173 114.042 226.980  1.00  0.00           O
ATOM   2020  N   PHE X 126     140.845 112.885 225.907  1.00  0.00           N
ATOM   2021  H   PHE X 126     141.141 112.104 225.340  1.00  0.00           H
ATOM   2022  CA  PHE X 126     141.888 113.688 226.578  1.00  0.00           C
ATOM   2023  HA  PHE X 126     141.756 113.526 227.648  1.00  0.00           H
ATOM   2024  CB  PHE X 126     143.291 113.148 226.164  1.00  0.00           C
ATOM   2025  HB2 PHE X 126     143.642 112.362 226.832  1.00  0.00           H
ATOM   2026  HB3 PHE X 126     143.233 112.841 225.119  1.00  0.00           H
ATOM   2027  CG  PHE X 126     144.436 114.166 226.183  1.00  0.00           C
ATOM   2028  CD1 PHE X 126     144.822 114.854 225.059  1.00  0.00           C
ATOM   2029  HD1 PHE X 126     144.406 114.668 224.080  1.00  0.00           H
ATOM   2030  CE1 PHE X 126     145.703 115.904 225.073  1.00  0.00           C
ATOM   2031  HE1 PHE X 126     146.023 116.380 224.159  1.00  0.00           H
ATOM   2032  CZ  PHE X 126     146.324 116.333 226.287  1.00  0.00           C
ATOM   2033  HZ  PHE X 126     147.067 117.116 226.234  1.00  0.00           H
ATOM   2034  CE2 PHE X 126     146.026 115.631 227.405  1.00  0.00           C
ATOM   2035  HE2 PHE X 126     146.605 115.853 228.289  1.00  0.00           H
ATOM   2036  CD2 PHE X 126     145.125 114.521 227.378  1.00  0.00           C
ATOM   2037  HD2 PHE X 126     144.839 114.030 228.297  1.00  0.00           H
ATOM   2038  C   PHE X 126     141.688 115.213 226.195  1.00  0.00           C
ATOM   2039  O   PHE X 126     141.875 116.104 226.963  1.00  0.00           O
ATOM   2040  N   SER X 127     141.350 115.476 224.932  1.00  0.00           N
ATOM   2041  H   SER X 127     141.350 114.736 224.245  1.00  0.00           H
ATOM   2042  CA  SER X 127     141.170 116.833 224.366  1.00  0.00           C
ATOM   2043  HA  SER X 127     142.010 117.475 224.630  1.00  0.00           H
ATOM   2044  CB  SER X 127     140.999 116.836 222.796  1.00  0.00           C
ATOM   2045  HB2 SER X 127     140.150 116.193 222.561  1.00  0.00           H
ATOM   2046  HB3 SER X 127     140.765 117.856 222.492  1.00  0.00           H
ATOM   2047  OG  SER X 127     142.190 116.352 222.209  1.00  0.00           O
ATOM   2048  HG  SER X 127     142.174 115.461 222.567  1.00  0.00           H
ATOM   2049  C   SER X 127     139.940 117.517 224.917  1.00  0.00           C
ATOM   2050  O   SER X 127     140.023 118.734 225.221  1.00  0.00           O
ATOM   2051  N   LEU X 128     138.823 116.765 225.117  1.00  0.00           N
ATOM   2052  H   LEU X 128     138.743 115.822 224.764  1.00  0.00           H
ATOM   2053  CA  LEU X 128     137.599 117.301 225.812  1.00  0.00           C
ATOM   2054  HA  LEU X 128     137.414 118.322 225.478  1.00  0.00           H
ATOM   2055  CB  LEU X 128     136.320 116.486 225.452  1.00  0.00           C
ATOM   2056  HB2 LEU X 128     136.576 115.427 225.409  1.00  0.00           H
ATOM   2057  HB3 LEU X 128     135.727 116.611 226.358  1.00  0.00           H
ATOM   2058  CG  LEU X 128     135.638 116.807 224.123  1.00  0.00           C
ATOM   2059  HG  LEU X 128     136.305 116.893 223.264  1.00  0.00           H
ATOM   2060  CD1 LEU X 128     134.465 115.884 223.726  1.00  0.00           C
ATOM   2061 HD11 LEU X 128     133.871 116.282 222.903  1.00  0.00           H
ATOM   2062 HD12 LEU X 128     133.806 115.736 224.581  1.00  0.00           H
ATOM   2063 HD13 LEU X 128     134.881 114.960 223.323  1.00  0.00           H
ATOM   2064  CD2 LEU X 128     134.928 118.138 224.268  1.00  0.00           C
ATOM   2065 HD21 LEU X 128     134.202 118.053 225.076  1.00  0.00           H
ATOM   2066 HD22 LEU X 128     135.623 118.913 224.590  1.00  0.00           H
ATOM   2067 HD23 LEU X 128     134.393 118.425 223.363  1.00  0.00           H
ATOM   2068  C   LEU X 128     137.755 117.371 227.377  1.00  0.00           C
ATOM   2069  O   LEU X 128     137.112 118.152 228.061  1.00  0.00           O
ATOM   2070  N   MET X 129     138.765 116.718 227.923  1.00  0.00           N
ATOM   2071  H   MET X 129     139.304 116.060 227.377  1.00  0.00           H
ATOM   2072  CA  MET X 129     139.068 116.845 229.348  1.00  0.00           C
ATOM   2073  HA  MET X 129     138.225 116.997 230.022  1.00  0.00           H
ATOM   2074  CB  MET X 129     139.780 115.557 229.916  1.00  0.00           C
ATOM   2075  HB2 MET X 129     139.133 114.698 229.739  1.00  0.00           H
ATOM   2076  HB3 MET X 129     140.704 115.433 229.353  1.00  0.00           H
ATOM   2077  CG  MET X 129     140.146 115.512 231.436  1.00  0.00           C
ATOM   2078  HG2 MET X 129     140.596 114.548 231.671  1.00  0.00           H
ATOM   2079  HG3 MET X 129     140.897 116.277 231.634  1.00  0.00           H
ATOM   2080  SD  MET X 129     138.636 115.626 232.492  1.00  0.00           S
ATOM   2081  CE  MET X 129     137.609 114.307 231.832  1.00  0.00           C
ATOM   2082  HE1 MET X 129     136.955 113.766 232.516  1.00  0.00           H
ATOM   2083  HE2 MET X 129     137.030 114.754 231.024  1.00  0.00           H
ATOM   2084  HE3 MET X 129     138.342 113.580 231.483  1.00  0.00           H
ATOM   2085  C   MET X 129     139.961 118.066 229.605  1.00  0.00           C
ATOM   2086  O   MET X 129     139.852 118.708 230.636  1.00  0.00           O
ATOM   2087  N   THR X 130     140.974 118.254 228.781  1.00  0.00           N
ATOM   2088  H   THR X 130     140.970 117.682 227.948  1.00  0.00           H
ATOM   2089  CA  THR X 130     141.995 119.289 229.058  1.00  0.00           C
ATOM   2090  HA  THR X 130     142.316 119.403 230.093  1.00  0.00           H
ATOM   2091  CB  THR X 130     143.224 118.947 228.213  1.00  0.00           C
ATOM   2092  HB  THR X 130     142.931 119.224 227.200  1.00  0.00           H
ATOM   2093  CG2 THR X 130     144.364 119.950 228.569  1.00  0.00           C
ATOM   2094 HG21 THR X 130     144.272 120.324 229.588  1.00  0.00           H
ATOM   2095 HG22 THR X 130     144.318 120.772 227.854  1.00  0.00           H
ATOM   2096 HG23 THR X 130     145.375 119.579 228.397  1.00  0.00           H
ATOM   2097  OG1 THR X 130     143.654 117.625 228.270  1.00  0.00           O
ATOM   2098  HG1 THR X 130     143.046 116.947 227.963  1.00  0.00           H
ATOM   2099  C   THR X 130     141.510 120.677 228.704  1.00  0.00           C
ATOM   2100  O   THR X 130     142.046 121.678 229.231  1.00  0.00           O
ATOM   2101  N   LEU X 131     140.496 120.825 227.800  1.00  0.00           N
ATOM   2102  H   LEU X 131     140.197 119.980 227.334  1.00  0.00           H
ATOM   2103  CA  LEU X 131     139.822 122.100 227.527  1.00  0.00           C
ATOM   2104  HA  LEU X 131     140.541 122.906 227.680  1.00  0.00           H
ATOM   2105  CB  LEU X 131     139.454 122.114 226.061  1.00  0.00           C
ATOM   2106  HB2 LEU X 131     138.835 121.249 225.823  1.00  0.00           H
ATOM   2107  HB3 LEU X 131     138.835 123.002 225.937  1.00  0.00           H
ATOM   2108  CG  LEU X 131     140.589 122.113 224.995  1.00  0.00           C
ATOM   2109  HG  LEU X 131     141.261 121.335 225.357  1.00  0.00           H
ATOM   2110  CD1 LEU X 131     140.027 121.940 223.568  1.00  0.00           C
ATOM   2111 HD11 LEU X 131     140.810 121.914 222.810  1.00  0.00           H
ATOM   2112 HD12 LEU X 131     139.300 122.701 223.284  1.00  0.00           H
ATOM   2113 HD13 LEU X 131     139.476 121.003 223.484  1.00  0.00           H
ATOM   2114  CD2 LEU X 131     141.413 123.442 224.861  1.00  0.00           C
ATOM   2115 HD21 LEU X 131     140.793 124.292 224.576  1.00  0.00           H
ATOM   2116 HD22 LEU X 131     141.741 123.639 225.882  1.00  0.00           H
ATOM   2117 HD23 LEU X 131     142.240 123.442 224.151  1.00  0.00           H
ATOM   2118  C   LEU X 131     138.655 122.385 228.435  1.00  0.00           C
ATOM   2119  O   LEU X 131     137.903 123.312 228.189  1.00  0.00           O
ATOM   2120  N   ARG X 132     138.444 121.586 229.500  1.00  0.00           N
ATOM   2121  H   ARG X 132     139.054 120.799 229.671  1.00  0.00           H
ATOM   2122  CA  ARG X 132     137.482 121.917 230.515  1.00  0.00           C
ATOM   2123  HA  ARG X 132     136.518 122.066 230.029  1.00  0.00           H
ATOM   2124  CB  ARG X 132     137.394 120.790 231.564  1.00  0.00           C
ATOM   2125  HB2 ARG X 132     136.456 120.822 232.119  1.00  0.00           H
ATOM   2126  HB3 ARG X 132     137.303 119.885 230.962  1.00  0.00           H
ATOM   2127  CG  ARG X 132     138.635 120.727 232.464  1.00  0.00           C
ATOM   2128  HG2 ARG X 132     139.522 120.541 231.860  1.00  0.00           H
ATOM   2129  HG3 ARG X 132     138.787 121.709 232.913  1.00  0.00           H
ATOM   2130  CD  ARG X 132     138.447 119.538 233.420  1.00  0.00           C
ATOM   2131  HD2 ARG X 132     137.576 119.868 233.987  1.00  0.00           H
ATOM   2132  HD3 ARG X 132     138.154 118.647 232.866  1.00  0.00           H
ATOM   2133  NE  ARG X 132     139.508 119.295 234.389  1.00  0.00           N
ATOM   2134  HE  ARG X 132     139.253 119.313 235.366  1.00  0.00           H
ATOM   2135  CZ  ARG X 132     140.772 119.035 234.159  1.00  0.00           C
ATOM   2136  NH1 ARG X 132     141.306 119.054 232.959  1.00  0.00           N
ATOM   2137 HH11 ARG X 132     140.765 119.043 232.106  1.00  0.00           H
ATOM   2138 HH12 ARG X 132     142.301 118.939 232.830  1.00  0.00           H
ATOM   2139  NH2 ARG X 132     141.615 118.922 235.136  1.00  0.00           N
ATOM   2140 HH21 ARG X 132     141.347 118.973 236.109  1.00  0.00           H
ATOM   2141 HH22 ARG X 132     142.601 118.735 235.018  1.00  0.00           H
ATOM   2142  C   ARG X 132     137.814 123.233 231.254  1.00  0.00           C
ATOM   2143  O   ARG X 132     138.986 123.697 231.100  1.00  0.00           O
ATOM   2144  N   ASN X 133     136.979 123.779 232.123  1.00  0.00           N
ATOM   2145  H   ASN X 133     136.109 123.288 232.277  1.00  0.00           H
ATOM   2146  CA  ASN X 133     137.121 125.238 232.387  1.00  0.00           C
ATOM   2147  HA  ASN X 133     136.986 125.915 231.543  1.00  0.00           H
ATOM   2148  CB  ASN X 133     136.074 125.727 233.423  1.00  0.00           C
ATOM   2149  HB2 ASN X 133     136.258 125.242 234.382  1.00  0.00           H
ATOM   2150  HB3 ASN X 133     136.202 126.779 233.679  1.00  0.00           H
ATOM   2151  CG  ASN X 133     134.667 125.461 232.916  1.00  0.00           C
ATOM   2152  OD1 ASN X 133     134.011 124.468 233.180  1.00  0.00           O
ATOM   2153  ND2 ASN X 133     134.134 126.357 232.072  1.00  0.00           N
ATOM   2154 HD21 ASN X 133     134.728 127.055 231.648  1.00  0.00           H
ATOM   2155 HD22 ASN X 133     133.322 126.015 231.578  1.00  0.00           H
ATOM   2156  C   ASN X 133     138.478 125.585 232.916  1.00  0.00           C
ATOM   2157  O   ASN X 133     139.001 126.733 232.668  1.00  0.00           O
ATOM   2158  N   PHE X 134     139.089 124.739 233.794  1.00  0.00           N
ATOM   2159  H   PHE X 134     138.471 124.001 234.100  1.00  0.00           H
ATOM   2160  CA  PHE X 134     140.409 124.897 234.390  1.00  0.00           C
ATOM   2161  HA  PHE X 134     140.896 125.349 233.526  1.00  0.00           H
ATOM   2162  CB  PHE X 134     140.203 125.689 235.703  1.00  0.00           C
ATOM   2163  HB2 PHE X 134     139.653 126.564 235.358  1.00  0.00           H
ATOM   2164  HB3 PHE X 134     139.524 125.127 236.344  1.00  0.00           H
ATOM   2165  CG  PHE X 134     141.422 126.130 236.461  1.00  0.00           C
ATOM   2166  CD1 PHE X 134     141.667 127.486 236.738  1.00  0.00           C
ATOM   2167  HD1 PHE X 134     141.094 128.251 236.234  1.00  0.00           H
ATOM   2168  CE1 PHE X 134     142.860 127.820 237.459  1.00  0.00           C
ATOM   2169  HE1 PHE X 134     143.066 128.870 237.602  1.00  0.00           H
ATOM   2170  CZ  PHE X 134     143.683 126.854 237.952  1.00  0.00           C
ATOM   2171  HZ  PHE X 134     144.483 127.165 238.608  1.00  0.00           H
ATOM   2172  CE2 PHE X 134     143.434 125.535 237.715  1.00  0.00           C
ATOM   2173  HE2 PHE X 134     144.149 124.833 238.118  1.00  0.00           H
ATOM   2174  CD2 PHE X 134     142.265 125.134 236.960  1.00  0.00           C
ATOM   2175  HD2 PHE X 134     142.154 124.077 236.766  1.00  0.00           H
ATOM   2176  C   PHE X 134     141.112 123.555 234.667  1.00  0.00           C
ATOM   2177  O   PHE X 134     140.552 122.631 235.329  1.00  0.00           O
ATOM   2178  N   GLY X 135     142.446 123.451 234.294  1.00  0.00           N
ATOM   2179  H   GLY X 135     142.871 124.195 233.760  1.00  0.00           H
ATOM   2180  CA  GLY X 135     143.306 122.303 234.597  1.00  0.00           C
ATOM   2181  HA2 GLY X 135     143.363 122.388 235.682  1.00  0.00           H
ATOM   2182  HA3 GLY X 135     142.817 121.365 234.333  1.00  0.00           H
ATOM   2183  C   GLY X 135     144.642 122.331 233.784  1.00  0.00           C
ATOM   2184  O   GLY X 135     145.287 121.318 233.590  1.00  0.00           O
ATOM   2185  N   MET X 136     145.051 123.529 233.436  1.00  0.00           N
ATOM   2186  H   MET X 136     144.690 124.386 233.830  1.00  0.00           H
ATOM   2187  CA  MET X 136     146.115 123.659 232.362  1.00  0.00           C
ATOM   2188  HA  MET X 136     146.806 122.825 232.482  1.00  0.00           H
ATOM   2189  CB  MET X 136     145.595 123.477 230.969  1.00  0.00           C
ATOM   2190  HB2 MET X 136     145.193 122.468 230.878  1.00  0.00           H
ATOM   2191  HB3 MET X 136     144.742 124.148 230.869  1.00  0.00           H
ATOM   2192  CG  MET X 136     146.520 123.692 229.771  1.00  0.00           C
ATOM   2193  HG2 MET X 136     146.979 124.681 229.752  1.00  0.00           H
ATOM   2194  HG3 MET X 136     147.352 123.008 229.941  1.00  0.00           H
ATOM   2195  SD  MET X 136     145.692 123.315 228.213  1.00  0.00           S
ATOM   2196  CE  MET X 136     144.401 124.506 228.060  1.00  0.00           C
ATOM   2197  HE1 MET X 136     143.537 124.365 228.709  1.00  0.00           H
ATOM   2198  HE2 MET X 136     144.856 125.480 228.243  1.00  0.00           H
ATOM   2199  HE3 MET X 136     144.116 124.402 227.013  1.00  0.00           H
ATOM   2200  C   MET X 136     146.740 125.020 232.525  1.00  0.00           C
ATOM   2201  O   MET X 136     146.292 126.037 231.986  1.00  0.00           O
ATOM   2202  N   GLY X 137     147.808 125.094 233.351  1.00  0.00           N
ATOM   2203  H   GLY X 137     148.030 124.205 233.775  1.00  0.00           H
ATOM   2204  CA  GLY X 137     148.348 126.394 233.738  1.00  0.00           C
ATOM   2205  HA2 GLY X 137     149.385 126.345 234.071  1.00  0.00           H
ATOM   2206  HA3 GLY X 137     148.388 127.044 232.864  1.00  0.00           H
ATOM   2207  C   GLY X 137     147.488 127.165 234.808  1.00  0.00           C
ATOM   2208  O   GLY X 137     146.604 126.623 235.548  1.00  0.00           O
ATOM   2209  N   LYS X 138     147.746 128.460 234.893  1.00  0.00           N
ATOM   2210  H   LYS X 138     148.346 128.930 234.230  1.00  0.00           H
ATOM   2211  CA  LYS X 138     147.551 129.250 236.128  1.00  0.00           C
ATOM   2212  HA  LYS X 138     147.619 128.548 236.959  1.00  0.00           H
ATOM   2213  CB  LYS X 138     148.712 130.298 236.173  1.00  0.00           C
ATOM   2214  HB2 LYS X 138     148.439 131.116 235.507  1.00  0.00           H
ATOM   2215  HB3 LYS X 138     148.818 130.724 237.171  1.00  0.00           H
ATOM   2216  CG  LYS X 138     150.158 129.836 235.912  1.00  0.00           C
ATOM   2217  HG2 LYS X 138     150.312 129.383 234.933  1.00  0.00           H
ATOM   2218  HG3 LYS X 138     150.850 130.671 236.027  1.00  0.00           H
ATOM   2219  CD  LYS X 138     150.520 128.679 236.939  1.00  0.00           C
ATOM   2220  HD2 LYS X 138     150.401 129.083 237.944  1.00  0.00           H
ATOM   2221  HD3 LYS X 138     149.746 127.919 236.836  1.00  0.00           H
ATOM   2222  CE  LYS X 138     151.890 128.071 236.666  1.00  0.00           C
ATOM   2223  HE2 LYS X 138     151.904 127.873 235.595  1.00  0.00           H
ATOM   2224  HE3 LYS X 138     152.658 128.827 236.827  1.00  0.00           H
ATOM   2225  NZ  LYS X 138     152.073 126.890 237.446  1.00  0.00           N
ATOM   2226  HZ1 LYS X 138     152.098 127.153 238.421  1.00  0.00           H
ATOM   2227  HZ2 LYS X 138     152.878 126.317 237.237  1.00  0.00           H
ATOM   2228  HZ3 LYS X 138     151.299 126.262 237.290  1.00  0.00           H
ATOM   2229  C   LYS X 138     146.138 129.916 236.252  1.00  0.00           C
ATOM   2230  O   LYS X 138     145.932 130.768 237.185  1.00  0.00           O
ATOM   2231  N   ARG X 139     145.181 129.624 235.374  1.00  0.00           N
ATOM   2232  H   ARG X 139     145.317 128.793 234.816  1.00  0.00           H
ATOM   2233  CA  ARG X 139     144.064 130.448 234.895  1.00  0.00           C
ATOM   2234  HA  ARG X 139     143.464 130.878 235.697  1.00  0.00           H
ATOM   2235  CB  ARG X 139     144.641 131.642 234.061  1.00  0.00           C
ATOM   2236  HB2 ARG X 139     143.754 132.270 233.973  1.00  0.00           H
ATOM   2237  HB3 ARG X 139     145.353 132.249 234.620  1.00  0.00           H
ATOM   2238  CG  ARG X 139     145.279 131.178 232.767  1.00  0.00           C
ATOM   2239  HG2 ARG X 139     146.026 130.390 232.858  1.00  0.00           H
ATOM   2240  HG3 ARG X 139     144.529 130.767 232.090  1.00  0.00           H
ATOM   2241  CD  ARG X 139     145.990 132.328 232.098  1.00  0.00           C
ATOM   2242  HD2 ARG X 139     146.735 132.816 232.726  1.00  0.00           H
ATOM   2243  HD3 ARG X 139     146.534 131.953 231.231  1.00  0.00           H
ATOM   2244  NE  ARG X 139     145.118 133.416 231.711  1.00  0.00           N
ATOM   2245  HE  ARG X 139     144.296 133.599 232.268  1.00  0.00           H
ATOM   2246  CZ  ARG X 139     145.531 134.384 230.971  1.00  0.00           C
ATOM   2247  NH1 ARG X 139     146.557 134.332 230.180  1.00  0.00           N
ATOM   2248 HH11 ARG X 139     146.802 133.389 229.913  1.00  0.00           H
ATOM   2249 HH12 ARG X 139     146.880 135.153 229.690  1.00  0.00           H
ATOM   2250  NH2 ARG X 139     145.031 135.553 231.111  1.00  0.00           N
ATOM   2251 HH21 ARG X 139     144.229 135.753 231.692  1.00  0.00           H
ATOM   2252 HH22 ARG X 139     145.260 136.303 230.475  1.00  0.00           H
ATOM   2253  C   ARG X 139     143.020 129.641 234.110  1.00  0.00           C
ATOM   2254  O   ARG X 139     143.319 128.513 233.631  1.00  0.00           O
ATOM   2255  N   SER X 140     141.838 130.174 234.014  1.00  0.00           N
ATOM   2256  H   SER X 140     141.642 131.068 234.440  1.00  0.00           H
ATOM   2257  CA  SER X 140     140.694 129.421 233.284  1.00  0.00           C
ATOM   2258  HA  SER X 140     140.722 128.357 233.519  1.00  0.00           H
ATOM   2259  CB  SER X 140     139.306 129.944 233.729  1.00  0.00           C
ATOM   2260  HB2 SER X 140     138.654 129.079 233.851  1.00  0.00           H
ATOM   2261  HB3 SER X 140     139.387 130.486 234.671  1.00  0.00           H
ATOM   2262  OG  SER X 140     138.792 130.817 232.806  1.00  0.00           O
ATOM   2263  HG  SER X 140     137.950 130.488 232.483  1.00  0.00           H
ATOM   2264  C   SER X 140     140.923 129.562 231.691  1.00  0.00           C
ATOM   2265  O   SER X 140     141.716 130.360 231.143  1.00  0.00           O
ATOM   2266  N   ILE X 141     140.128 128.888 230.908  1.00  0.00           N
ATOM   2267  H   ILE X 141     139.489 128.234 231.337  1.00  0.00           H
ATOM   2268  CA  ILE X 141     139.959 129.103 229.473  1.00  0.00           C
ATOM   2269  HA  ILE X 141     140.930 128.911 229.015  1.00  0.00           H
ATOM   2270  CB  ILE X 141     138.925 128.065 228.956  1.00  0.00           C
ATOM   2271  HB  ILE X 141     138.125 128.020 229.695  1.00  0.00           H
ATOM   2272  CG2 ILE X 141     138.286 128.478 227.620  1.00  0.00           C
ATOM   2273 HG21 ILE X 141     137.893 129.494 227.603  1.00  0.00           H
ATOM   2274 HG22 ILE X 141     137.475 127.892 227.189  1.00  0.00           H
ATOM   2275 HG23 ILE X 141     139.063 128.510 226.857  1.00  0.00           H
ATOM   2276  CG1 ILE X 141     139.456 126.568 228.885  1.00  0.00           C
ATOM   2277 HG12 ILE X 141     139.927 126.430 229.859  1.00  0.00           H
ATOM   2278 HG13 ILE X 141     138.700 125.783 228.876  1.00  0.00           H
ATOM   2279  CD1 ILE X 141     140.514 126.230 227.813  1.00  0.00           C
ATOM   2280 HD11 ILE X 141     139.962 126.307 226.876  1.00  0.00           H
ATOM   2281 HD12 ILE X 141     140.990 125.254 227.905  1.00  0.00           H
ATOM   2282 HD13 ILE X 141     141.150 127.115 227.839  1.00  0.00           H
ATOM   2283  C   ILE X 141     139.525 130.576 229.224  1.00  0.00           C
ATOM   2284  O   ILE X 141     140.186 131.266 228.421  1.00  0.00           O
ATOM   2285  N   GLU X 142     138.418 131.041 229.794  1.00  0.00           N
ATOM   2286  H   GLU X 142     137.941 130.448 230.458  1.00  0.00           H
ATOM   2287  CA  GLU X 142     137.757 132.334 229.470  1.00  0.00           C
ATOM   2288  HA  GLU X 142     137.676 132.295 228.384  1.00  0.00           H
ATOM   2289  CB  GLU X 142     136.272 132.269 230.114  1.00  0.00           C
ATOM   2290  HB2 GLU X 142     136.361 132.453 231.185  1.00  0.00           H
ATOM   2291  HB3 GLU X 142     135.686 133.072 229.667  1.00  0.00           H
ATOM   2292  CG  GLU X 142     135.496 130.932 229.912  1.00  0.00           C
ATOM   2293  HG2 GLU X 142     134.432 131.152 229.823  1.00  0.00           H
ATOM   2294  HG3 GLU X 142     135.746 130.479 228.953  1.00  0.00           H
ATOM   2295  CD  GLU X 142     135.771 129.859 231.006  1.00  0.00           C
ATOM   2296  OE1 GLU X 142     135.252 128.729 230.794  1.00  0.00           O
ATOM   2297  OE2 GLU X 142     136.555 130.052 231.984  1.00  0.00           O
ATOM   2298  C   GLU X 142     138.543 133.623 229.921  1.00  0.00           C
ATOM   2299  O   GLU X 142     138.521 134.681 229.284  1.00  0.00           O
ATOM   2300  N   ASP X 143     139.395 133.508 230.904  1.00  0.00           N
ATOM   2301  H   ASP X 143     139.510 132.601 231.333  1.00  0.00           H
ATOM   2302  CA  ASP X 143     140.190 134.632 231.357  1.00  0.00           C
ATOM   2303  HA  ASP X 143     139.557 135.505 231.517  1.00  0.00           H
ATOM   2304  CB  ASP X 143     140.772 134.360 232.700  1.00  0.00           C
ATOM   2305  HB2 ASP X 143     140.055 134.194 233.504  1.00  0.00           H
ATOM   2306  HB3 ASP X 143     141.334 133.441 232.534  1.00  0.00           H
ATOM   2307  CG  ASP X 143     141.720 135.491 233.182  1.00  0.00           C
ATOM   2308  OD1 ASP X 143     141.320 136.478 233.752  1.00  0.00           O
ATOM   2309  OD2 ASP X 143     142.933 135.401 232.966  1.00  0.00           O
ATOM   2310  C   ASP X 143     141.204 135.079 230.305  1.00  0.00           C
ATOM   2311  O   ASP X 143     141.290 136.264 230.076  1.00  0.00           O
ATOM   2312  N   ARG X 144     141.727 134.102 229.492  1.00  0.00           N
ATOM   2313  H   ARG X 144     141.476 133.166 229.778  1.00  0.00           H
ATOM   2314  CA  ARG X 144     142.661 134.302 228.397  1.00  0.00           C
ATOM   2315  HA  ARG X 144     143.490 134.963 228.653  1.00  0.00           H
ATOM   2316  CB  ARG X 144     143.402 133.031 227.841  1.00  0.00           C
ATOM   2317  HB2 ARG X 144     142.750 132.512 227.140  1.00  0.00           H
ATOM   2318  HB3 ARG X 144     144.232 133.465 227.283  1.00  0.00           H
ATOM   2319  CG  ARG X 144     143.961 131.962 228.800  1.00  0.00           C
ATOM   2320  HG2 ARG X 144     144.723 132.501 229.362  1.00  0.00           H
ATOM   2321  HG3 ARG X 144     143.233 131.617 229.534  1.00  0.00           H
ATOM   2322  CD  ARG X 144     144.580 130.767 228.152  1.00  0.00           C
ATOM   2323  HD2 ARG X 144     143.783 130.231 227.636  1.00  0.00           H
ATOM   2324  HD3 ARG X 144     145.242 131.182 227.392  1.00  0.00           H
ATOM   2325  NE  ARG X 144     145.364 129.974 228.968  1.00  0.00           N
ATOM   2326  HE  ARG X 144     146.354 130.168 228.937  1.00  0.00           H
ATOM   2327  CZ  ARG X 144     144.998 129.021 229.758  1.00  0.00           C
ATOM   2328  NH1 ARG X 144     143.749 128.752 230.017  1.00  0.00           N
ATOM   2329 HH11 ARG X 144     143.039 129.435 229.793  1.00  0.00           H
ATOM   2330 HH12 ARG X 144     143.433 127.962 230.562  1.00  0.00           H
ATOM   2331  NH2 ARG X 144     145.981 128.287 230.346  1.00  0.00           N
ATOM   2332 HH21 ARG X 144     146.902 128.451 229.965  1.00  0.00           H
ATOM   2333 HH22 ARG X 144     145.846 127.545 231.018  1.00  0.00           H
ATOM   2334  C   ARG X 144     142.020 134.993 227.265  1.00  0.00           C
ATOM   2335  O   ARG X 144     142.636 135.697 226.507  1.00  0.00           O
ATOM   2336  N   VAL X 145     140.739 134.661 227.061  1.00  0.00           N
ATOM   2337  H   VAL X 145     140.335 134.034 227.741  1.00  0.00           H
ATOM   2338  CA  VAL X 145     139.958 135.224 225.965  1.00  0.00           C
ATOM   2339  HA  VAL X 145     140.643 135.348 225.127  1.00  0.00           H
ATOM   2340  CB  VAL X 145     138.828 134.285 225.625  1.00  0.00           C
ATOM   2341  HB  VAL X 145     138.095 134.371 226.427  1.00  0.00           H
ATOM   2342  CG1 VAL X 145     137.961 134.671 224.391  1.00  0.00           C
ATOM   2343 HG11 VAL X 145     137.095 134.016 224.287  1.00  0.00           H
ATOM   2344 HG12 VAL X 145     137.569 135.686 224.451  1.00  0.00           H
ATOM   2345 HG13 VAL X 145     138.581 134.487 223.514  1.00  0.00           H
ATOM   2346  CG2 VAL X 145     139.220 132.791 225.395  1.00  0.00           C
ATOM   2347 HG21 VAL X 145     138.377 132.105 225.316  1.00  0.00           H
ATOM   2348 HG22 VAL X 145     139.755 132.397 226.259  1.00  0.00           H
ATOM   2349 HG23 VAL X 145     139.698 132.576 224.439  1.00  0.00           H
ATOM   2350  C   VAL X 145     139.461 136.663 226.277  1.00  0.00           C
ATOM   2351  O   VAL X 145     139.582 137.494 225.373  1.00  0.00           O
ATOM   2352  N   GLN X 146     139.075 136.981 227.499  1.00  0.00           N
ATOM   2353  H   GLN X 146     138.893 136.272 228.195  1.00  0.00           H
ATOM   2354  CA  GLN X 146     138.925 138.361 227.960  1.00  0.00           C
ATOM   2355  HA  GLN X 146     138.161 138.780 227.305  1.00  0.00           H
ATOM   2356  CB  GLN X 146     138.463 138.372 229.462  1.00  0.00           C
ATOM   2357  HB2 GLN X 146     137.906 137.482 229.753  1.00  0.00           H
ATOM   2358  HB3 GLN X 146     139.403 138.300 230.010  1.00  0.00           H
ATOM   2359  CG  GLN X 146     137.750 139.678 229.968  1.00  0.00           C
ATOM   2360  HG2 GLN X 146     138.342 140.542 229.667  1.00  0.00           H
ATOM   2361  HG3 GLN X 146     136.755 139.766 229.534  1.00  0.00           H
ATOM   2362  CD  GLN X 146     137.636 139.613 231.476  1.00  0.00           C
ATOM   2363  OE1 GLN X 146     136.574 139.853 231.999  1.00  0.00           O
ATOM   2364  NE2 GLN X 146     138.599 139.198 232.263  1.00  0.00           N
ATOM   2365 HE21 GLN X 146     138.414 138.868 233.199  1.00  0.00           H
ATOM   2366 HE22 GLN X 146     139.484 139.076 231.792  1.00  0.00           H
ATOM   2367  C   GLN X 146     140.219 139.211 227.862  1.00  0.00           C
ATOM   2368  O   GLN X 146     140.042 140.396 227.686  1.00  0.00           O
ATOM   2369  N   GLU X 147     141.434 138.683 227.969  1.00  0.00           N
ATOM   2370  H   GLU X 147     141.440 137.705 228.221  1.00  0.00           H
ATOM   2371  CA  GLU X 147     142.694 139.432 227.795  1.00  0.00           C
ATOM   2372  HA  GLU X 147     142.695 140.426 228.243  1.00  0.00           H
ATOM   2373  CB  GLU X 147     143.787 138.569 228.512  1.00  0.00           C
ATOM   2374  HB2 GLU X 147     143.495 138.328 229.534  1.00  0.00           H
ATOM   2375  HB3 GLU X 147     143.929 137.592 228.050  1.00  0.00           H
ATOM   2376  CG  GLU X 147     145.109 139.345 228.583  1.00  0.00           C
ATOM   2377  HG2 GLU X 147     145.556 139.375 227.589  1.00  0.00           H
ATOM   2378  HG3 GLU X 147     144.889 140.327 229.001  1.00  0.00           H
ATOM   2379  CD  GLU X 147     146.186 138.567 229.450  1.00  0.00           C
ATOM   2380  OE1 GLU X 147     147.157 139.248 229.930  1.00  0.00           O
ATOM   2381  OE2 GLU X 147     146.127 137.334 229.453  1.00  0.00           O
ATOM   2382  C   GLU X 147     143.043 139.627 226.359  1.00  0.00           C
ATOM   2383  O   GLU X 147     143.433 140.718 226.057  1.00  0.00           O
ATOM   2384  N   GLU X 148     142.843 138.642 225.504  1.00  0.00           N
ATOM   2385  H   GLU X 148     142.356 137.805 225.790  1.00  0.00           H
ATOM   2386  CA  GLU X 148     142.879 138.950 224.079  1.00  0.00           C
ATOM   2387  HA  GLU X 148     143.877 139.336 223.871  1.00  0.00           H
ATOM   2388  CB  GLU X 148     142.575 137.694 223.257  1.00  0.00           C
ATOM   2389  HB2 GLU X 148     143.006 136.813 223.732  1.00  0.00           H
ATOM   2390  HB3 GLU X 148     141.503 137.495 223.238  1.00  0.00           H
ATOM   2391  CG  GLU X 148     143.118 137.796 221.819  1.00  0.00           C
ATOM   2392  HG2 GLU X 148     142.792 136.888 221.312  1.00  0.00           H
ATOM   2393  HG3 GLU X 148     142.679 138.677 221.349  1.00  0.00           H
ATOM   2394  CD  GLU X 148     144.686 137.922 221.762  1.00  0.00           C
ATOM   2395  OE1 GLU X 148     145.200 138.421 220.749  1.00  0.00           O
ATOM   2396  OE2 GLU X 148     145.353 137.543 222.768  1.00  0.00           O
ATOM   2397  C   GLU X 148     141.924 140.042 223.583  1.00  0.00           C
ATOM   2398  O   GLU X 148     142.269 140.918 222.768  1.00  0.00           O
ATOM   2399  N   ALA X 149     140.695 140.111 224.163  1.00  0.00           N
ATOM   2400  H   ALA X 149     140.422 139.282 224.670  1.00  0.00           H
ATOM   2401  CA  ALA X 149     139.557 140.998 223.691  1.00  0.00           C
ATOM   2402  HA  ALA X 149     139.429 141.013 222.608  1.00  0.00           H
ATOM   2403  CB  ALA X 149     138.197 140.568 224.311  1.00  0.00           C
ATOM   2404  HB1 ALA X 149     137.911 139.531 224.137  1.00  0.00           H
ATOM   2405  HB2 ALA X 149     137.290 141.083 223.993  1.00  0.00           H
ATOM   2406  HB3 ALA X 149     138.320 140.764 225.376  1.00  0.00           H
ATOM   2407  C   ALA X 149     139.924 142.478 224.073  1.00  0.00           C
ATOM   2408  O   ALA X 149     139.799 143.402 223.271  1.00  0.00           O
ATOM   2409  N   ARG X 150     140.564 142.622 225.254  1.00  0.00           N
ATOM   2410  H   ARG X 150     140.493 141.843 225.893  1.00  0.00           H
ATOM   2411  CA  ARG X 150     141.140 143.848 225.830  1.00  0.00           C
ATOM   2412  HA  ARG X 150     140.300 144.518 225.644  1.00  0.00           H
ATOM   2413  CB  ARG X 150     141.430 143.716 227.361  1.00  0.00           C
ATOM   2414  HB2 ARG X 150     140.496 143.284 227.718  1.00  0.00           H
ATOM   2415  HB3 ARG X 150     142.279 143.064 227.569  1.00  0.00           H
ATOM   2416  CG  ARG X 150     141.578 145.079 228.076  1.00  0.00           C
ATOM   2417  HG2 ARG X 150     142.508 145.601 227.847  1.00  0.00           H
ATOM   2418  HG3 ARG X 150     140.755 145.688 227.702  1.00  0.00           H
ATOM   2419  CD  ARG X 150     141.642 144.938 229.617  1.00  0.00           C
ATOM   2420  HD2 ARG X 150     142.614 144.478 229.793  1.00  0.00           H
ATOM   2421  HD3 ARG X 150     141.714 145.982 229.923  1.00  0.00           H
ATOM   2422  NE  ARG X 150     140.727 144.044 230.321  1.00  0.00           N
ATOM   2423  HE  ARG X 150     141.031 143.137 230.647  1.00  0.00           H
ATOM   2424  CZ  ARG X 150     139.440 144.229 230.576  1.00  0.00           C
ATOM   2425  NH1 ARG X 150     138.828 145.243 230.179  1.00  0.00           N
ATOM   2426 HH11 ARG X 150     139.312 146.053 229.820  1.00  0.00           H
ATOM   2427 HH12 ARG X 150     137.879 145.410 230.480  1.00  0.00           H
ATOM   2428  NH2 ARG X 150     138.631 143.420 231.146  1.00  0.00           N
ATOM   2429 HH21 ARG X 150     139.066 142.685 231.685  1.00  0.00           H
ATOM   2430 HH22 ARG X 150     137.632 143.568 231.147  1.00  0.00           H
ATOM   2431  C   ARG X 150     142.305 144.429 225.045  1.00  0.00           C
ATOM   2432  O   ARG X 150     142.449 145.662 224.913  1.00  0.00           O
ATOM   2433  N   CYS X 151     143.024 143.525 224.331  1.00  0.00           N
ATOM   2434  H   CYS X 151     142.649 142.591 224.247  1.00  0.00           H
ATOM   2435  CA  CYS X 151     144.100 143.876 223.325  1.00  0.00           C
ATOM   2436  HA  CYS X 151     144.585 144.781 223.691  1.00  0.00           H
ATOM   2437  CB  CYS X 151     145.184 142.757 223.243  1.00  0.00           C
ATOM   2438  HB2 CYS X 151     144.708 141.817 222.963  1.00  0.00           H
ATOM   2439  HB3 CYS X 151     145.975 143.069 222.562  1.00  0.00           H
ATOM   2440  SG  CYS X 151     145.958 142.496 224.884  1.00  0.00           S
ATOM   2441  HG  CYS X 151     144.910 141.772 225.288  1.00  0.00           H
ATOM   2442  C   CYS X 151     143.669 144.193 221.845  1.00  0.00           C
ATOM   2443  O   CYS X 151     144.218 145.022 221.105  1.00  0.00           O
ATOM   2444  N   LEU X 152     142.593 143.523 221.402  1.00  0.00           N
ATOM   2445  H   LEU X 152     142.350 142.720 221.965  1.00  0.00           H
ATOM   2446  CA  LEU X 152     141.946 143.819 220.161  1.00  0.00           C
ATOM   2447  HA  LEU X 152     142.705 143.737 219.383  1.00  0.00           H
ATOM   2448  CB  LEU X 152     140.808 142.716 219.931  1.00  0.00           C
ATOM   2449  HB2 LEU X 152     141.257 141.750 220.159  1.00  0.00           H
ATOM   2450  HB3 LEU X 152     140.029 142.921 220.666  1.00  0.00           H
ATOM   2451  CG  LEU X 152     140.002 142.749 218.558  1.00  0.00           C
ATOM   2452  HG  LEU X 152     139.331 143.600 218.446  1.00  0.00           H
ATOM   2453  CD1 LEU X 152     140.956 142.906 217.356  1.00  0.00           C
ATOM   2454 HD11 LEU X 152     141.471 143.864 217.291  1.00  0.00           H
ATOM   2455 HD12 LEU X 152     140.426 142.779 216.412  1.00  0.00           H
ATOM   2456 HD13 LEU X 152     141.769 142.180 217.398  1.00  0.00           H
ATOM   2457  CD2 LEU X 152     139.142 141.477 218.452  1.00  0.00           C
ATOM   2458 HD21 LEU X 152     138.412 141.477 219.261  1.00  0.00           H
ATOM   2459 HD22 LEU X 152     138.466 141.549 217.600  1.00  0.00           H
ATOM   2460 HD23 LEU X 152     139.694 140.545 218.330  1.00  0.00           H
ATOM   2461  C   LEU X 152     141.298 145.208 220.062  1.00  0.00           C
ATOM   2462  O   LEU X 152     141.426 146.010 219.097  1.00  0.00           O
ATOM   2463  N   VAL X 153     140.787 145.724 221.222  1.00  0.00           N
ATOM   2464  H   VAL X 153     140.777 145.129 222.037  1.00  0.00           H
ATOM   2465  CA  VAL X 153     140.239 147.088 221.547  1.00  0.00           C
ATOM   2466  HA  VAL X 153     139.470 147.279 220.798  1.00  0.00           H
ATOM   2467  CB  VAL X 153     139.791 147.361 222.993  1.00  0.00           C
ATOM   2468  HB  VAL X 153     140.561 146.882 223.597  1.00  0.00           H
ATOM   2469  CG1 VAL X 153     139.436 148.779 223.500  1.00  0.00           C
ATOM   2470 HG11 VAL X 153     139.229 148.631 224.560  1.00  0.00           H
ATOM   2471 HG12 VAL X 153     140.277 149.461 223.626  1.00  0.00           H
ATOM   2472 HG13 VAL X 153     138.588 149.200 222.961  1.00  0.00           H
ATOM   2473  CG2 VAL X 153     138.553 146.554 223.401  1.00  0.00           C
ATOM   2474 HG21 VAL X 153     138.555 145.537 223.010  1.00  0.00           H
ATOM   2475 HG22 VAL X 153     137.596 147.011 223.148  1.00  0.00           H
ATOM   2476 HG23 VAL X 153     138.632 146.428 224.481  1.00  0.00           H
ATOM   2477  C   VAL X 153     141.256 148.154 221.123  1.00  0.00           C
ATOM   2478  O   VAL X 153     140.920 149.183 220.528  1.00  0.00           O
ATOM   2479  N   GLU X 154     142.562 147.871 221.456  1.00  0.00           N
ATOM   2480  H   GLU X 154     142.766 146.967 221.858  1.00  0.00           H
ATOM   2481  CA  GLU X 154     143.759 148.746 221.142  1.00  0.00           C
ATOM   2482  HA  GLU X 154     143.480 149.771 221.389  1.00  0.00           H
ATOM   2483  CB  GLU X 154     144.955 148.384 221.972  1.00  0.00           C
ATOM   2484  HB2 GLU X 154     144.671 148.587 223.005  1.00  0.00           H
ATOM   2485  HB3 GLU X 154     145.077 147.301 221.975  1.00  0.00           H
ATOM   2486  CG  GLU X 154     146.272 149.164 221.702  1.00  0.00           C
ATOM   2487  HG2 GLU X 154     146.961 148.881 222.498  1.00  0.00           H
ATOM   2488  HG3 GLU X 154     146.689 148.852 220.744  1.00  0.00           H
ATOM   2489  CD  GLU X 154     146.296 150.674 221.731  1.00  0.00           C
ATOM   2490  OE1 GLU X 154     145.337 151.287 222.340  1.00  0.00           O
ATOM   2491  OE2 GLU X 154     147.321 151.306 221.529  1.00  0.00           O
ATOM   2492  C   GLU X 154     144.123 148.747 219.664  1.00  0.00           C
ATOM   2493  O   GLU X 154     144.466 149.814 219.126  1.00  0.00           O
ATOM   2494  N   GLU X 155     143.987 147.617 218.930  1.00  0.00           N
ATOM   2495  H   GLU X 155     143.669 146.768 219.374  1.00  0.00           H
ATOM   2496  CA  GLU X 155     144.129 147.639 217.499  1.00  0.00           C
ATOM   2497  HA  GLU X 155     145.054 148.161 217.255  1.00  0.00           H
ATOM   2498  CB  GLU X 155     144.216 146.236 216.898  1.00  0.00           C
ATOM   2499  HB2 GLU X 155     143.289 145.703 217.106  1.00  0.00           H
ATOM   2500  HB3 GLU X 155     144.466 146.405 215.851  1.00  0.00           H
ATOM   2501  CG  GLU X 155     145.384 145.352 217.521  1.00  0.00           C
ATOM   2502  HG2 GLU X 155     145.247 145.231 218.596  1.00  0.00           H
ATOM   2503  HG3 GLU X 155     145.281 144.380 217.038  1.00  0.00           H
ATOM   2504  CD  GLU X 155     146.748 145.907 217.268  1.00  0.00           C
ATOM   2505  OE1 GLU X 155     147.612 145.888 218.153  1.00  0.00           O
ATOM   2506  OE2 GLU X 155     147.000 146.396 216.154  1.00  0.00           O
ATOM   2507  C   GLU X 155     143.078 148.525 216.863  1.00  0.00           C
ATOM   2508  O   GLU X 155     143.392 149.303 215.983  1.00  0.00           O
ATOM   2509  N   LEU X 156     141.826 148.486 217.284  1.00  0.00           N
ATOM   2510  H   LEU X 156     141.556 147.743 217.912  1.00  0.00           H
ATOM   2511  CA  LEU X 156     140.779 149.284 216.603  1.00  0.00           C
ATOM   2512  HA  LEU X 156     140.865 149.183 215.521  1.00  0.00           H
ATOM   2513  CB  LEU X 156     139.440 148.538 216.998  1.00  0.00           C
ATOM   2514  HB2 LEU X 156     139.201 148.670 218.054  1.00  0.00           H
ATOM   2515  HB3 LEU X 156     138.663 149.078 216.457  1.00  0.00           H
ATOM   2516  CG  LEU X 156     139.328 147.067 216.629  1.00  0.00           C
ATOM   2517  HG  LEU X 156     140.133 146.537 217.138  1.00  0.00           H
ATOM   2518  CD1 LEU X 156     138.000 146.525 217.171  1.00  0.00           C
ATOM   2519 HD11 LEU X 156     137.976 146.721 218.243  1.00  0.00           H
ATOM   2520 HD12 LEU X 156     138.220 145.465 217.044  1.00  0.00           H
ATOM   2521 HD13 LEU X 156     137.096 146.862 216.664  1.00  0.00           H
ATOM   2522  CD2 LEU X 156     139.332 146.871 215.095  1.00  0.00           C
ATOM   2523 HD21 LEU X 156     140.362 146.859 214.737  1.00  0.00           H
ATOM   2524 HD22 LEU X 156     138.912 145.880 214.926  1.00  0.00           H
ATOM   2525 HD23 LEU X 156     138.764 147.664 214.607  1.00  0.00           H
ATOM   2526  C   LEU X 156     140.838 150.738 217.009  1.00  0.00           C
ATOM   2527  O   LEU X 156     140.740 151.609 216.101  1.00  0.00           O
ATOM   2528  N   ARG X 157     141.327 151.082 218.179  1.00  0.00           N
ATOM   2529  H   ARG X 157     141.590 150.291 218.749  1.00  0.00           H
ATOM   2530  CA  ARG X 157     141.746 152.444 218.563  1.00  0.00           C
ATOM   2531  HA  ARG X 157     140.942 153.084 218.200  1.00  0.00           H
ATOM   2532  CB  ARG X 157     142.000 152.624 220.068  1.00  0.00           C
ATOM   2533  HB2 ARG X 157     141.234 152.197 220.716  1.00  0.00           H
ATOM   2534  HB3 ARG X 157     142.957 152.137 220.253  1.00  0.00           H
ATOM   2535  CG  ARG X 157     142.058 154.036 220.566  1.00  0.00           C
ATOM   2536  HG2 ARG X 157     142.707 154.633 219.925  1.00  0.00           H
ATOM   2537  HG3 ARG X 157     141.109 154.571 220.527  1.00  0.00           H
ATOM   2538  CD  ARG X 157     142.650 154.160 221.992  1.00  0.00           C
ATOM   2539  HD2 ARG X 157     142.543 155.187 222.340  1.00  0.00           H
ATOM   2540  HD3 ARG X 157     141.981 153.496 222.539  1.00  0.00           H
ATOM   2541  NE  ARG X 157     144.092 153.674 222.008  1.00  0.00           N
ATOM   2542  HE  ARG X 157     144.334 152.703 222.146  1.00  0.00           H
ATOM   2543  CZ  ARG X 157     145.083 154.500 221.767  1.00  0.00           C
ATOM   2544  NH1 ARG X 157     144.868 155.700 221.337  1.00  0.00           N
ATOM   2545 HH11 ARG X 157     143.933 156.082 221.339  1.00  0.00           H
ATOM   2546 HH12 ARG X 157     145.705 156.185 221.045  1.00  0.00           H
ATOM   2547  NH2 ARG X 157     146.317 154.090 221.732  1.00  0.00           N
ATOM   2548 HH21 ARG X 157     146.488 153.096 221.771  1.00  0.00           H
ATOM   2549 HH22 ARG X 157     147.001 154.780 221.456  1.00  0.00           H
ATOM   2550  C   ARG X 157     142.933 153.042 217.814  1.00  0.00           C
ATOM   2551  O   ARG X 157     142.880 154.191 217.318  1.00  0.00           O
ATOM   2552  N   LYS X 158     143.873 152.170 217.420  1.00  0.00           N
ATOM   2553  H   LYS X 158     143.837 151.243 217.821  1.00  0.00           H
ATOM   2554  CA  LYS X 158     144.944 152.490 216.483  1.00  0.00           C
ATOM   2555  HA  LYS X 158     145.411 153.363 216.940  1.00  0.00           H
ATOM   2556  CB  LYS X 158     145.992 151.461 216.471  1.00  0.00           C
ATOM   2557  HB2 LYS X 158     145.527 150.481 216.365  1.00  0.00           H
ATOM   2558  HB3 LYS X 158     146.558 151.621 215.553  1.00  0.00           H
ATOM   2559  CG  LYS X 158     146.837 151.397 217.747  1.00  0.00           C
ATOM   2560  HG2 LYS X 158     147.635 152.139 217.720  1.00  0.00           H
ATOM   2561  HG3 LYS X 158     146.367 151.578 218.714  1.00  0.00           H
ATOM   2562  CD  LYS X 158     147.527 150.035 217.911  1.00  0.00           C
ATOM   2563  HD2 LYS X 158     147.961 149.919 218.904  1.00  0.00           H
ATOM   2564  HD3 LYS X 158     146.742 149.285 217.815  1.00  0.00           H
ATOM   2565  CE  LYS X 158     148.453 149.721 216.814  1.00  0.00           C
ATOM   2566  HE2 LYS X 158     147.991 149.916 215.846  1.00  0.00           H
ATOM   2567  HE3 LYS X 158     149.343 150.341 216.920  1.00  0.00           H
ATOM   2568  NZ  LYS X 158     148.935 148.343 216.887  1.00  0.00           N
ATOM   2569  HZ1 LYS X 158     149.679 148.265 216.208  1.00  0.00           H
ATOM   2570  HZ2 LYS X 158     148.223 147.671 216.642  1.00  0.00           H
ATOM   2571  HZ3 LYS X 158     149.276 148.197 217.827  1.00  0.00           H
ATOM   2572  C   LYS X 158     144.418 152.913 215.080  1.00  0.00           C
ATOM   2573  O   LYS X 158     145.055 153.653 214.369  1.00  0.00           O
ATOM   2574  N   THR X 159     143.215 152.411 214.668  1.00  0.00           N
ATOM   2575  H   THR X 159     142.761 151.657 215.164  1.00  0.00           H
ATOM   2576  CA  THR X 159     142.638 152.892 213.352  1.00  0.00           C
ATOM   2577  HA  THR X 159     143.519 152.973 212.715  1.00  0.00           H
ATOM   2578  CB  THR X 159     141.629 151.874 212.765  1.00  0.00           C
ATOM   2579  HB  THR X 159     141.534 152.027 211.690  1.00  0.00           H
ATOM   2580  CG2 THR X 159     142.150 150.441 212.976  1.00  0.00           C
ATOM   2581 HG21 THR X 159     143.045 150.420 212.354  1.00  0.00           H
ATOM   2582 HG22 THR X 159     141.354 149.771 212.650  1.00  0.00           H
ATOM   2583 HG23 THR X 159     142.412 150.278 214.022  1.00  0.00           H
ATOM   2584  OG1 THR X 159     140.327 151.857 213.378  1.00  0.00           O
ATOM   2585  HG1 THR X 159     140.425 151.639 214.308  1.00  0.00           H
ATOM   2586  C   THR X 159     141.857 154.208 213.449  1.00  0.00           C
ATOM   2587  O   THR X 159     141.308 154.683 212.491  1.00  0.00           O
ATOM   2588  N   LYS X 160     141.757 154.826 214.654  1.00  0.00           N
ATOM   2589  H   LYS X 160     142.165 154.223 215.354  1.00  0.00           H
ATOM   2590  CA  LYS X 160     141.267 156.169 215.030  1.00  0.00           C
ATOM   2591  HA  LYS X 160     140.923 156.045 216.057  1.00  0.00           H
ATOM   2592  CB  LYS X 160     142.348 157.322 214.844  1.00  0.00           C
ATOM   2593  HB2 LYS X 160     142.536 157.457 213.779  1.00  0.00           H
ATOM   2594  HB3 LYS X 160     141.914 158.260 215.190  1.00  0.00           H
ATOM   2595  CG  LYS X 160     143.684 157.158 215.594  1.00  0.00           C
ATOM   2596  HG2 LYS X 160     143.426 156.928 216.628  1.00  0.00           H
ATOM   2597  HG3 LYS X 160     144.210 156.302 215.173  1.00  0.00           H
ATOM   2598  CD  LYS X 160     144.624 158.356 215.587  1.00  0.00           C
ATOM   2599  HD2 LYS X 160     143.902 159.145 215.798  1.00  0.00           H
ATOM   2600  HD3 LYS X 160     145.411 158.357 216.342  1.00  0.00           H
ATOM   2601  CE  LYS X 160     145.240 158.598 214.182  1.00  0.00           C
ATOM   2602  HE2 LYS X 160     145.989 157.818 214.041  1.00  0.00           H
ATOM   2603  HE3 LYS X 160     144.478 158.613 213.402  1.00  0.00           H
ATOM   2604  NZ  LYS X 160     145.911 159.855 214.124  1.00  0.00           N
ATOM   2605  HZ1 LYS X 160     146.704 159.951 214.743  1.00  0.00           H
ATOM   2606  HZ2 LYS X 160     145.364 160.689 214.284  1.00  0.00           H
ATOM   2607  HZ3 LYS X 160     146.297 159.906 213.192  1.00  0.00           H
ATOM   2608  C   LYS X 160     139.944 156.458 214.317  1.00  0.00           C
ATOM   2609  O   LYS X 160     139.846 157.474 213.587  1.00  0.00           O
ATOM   2610  N   ALA X 161     138.940 155.633 214.443  1.00  0.00           N
ATOM   2611  H   ALA X 161     138.978 154.911 215.149  1.00  0.00           H
ATOM   2612  CA  ALA X 161     137.732 155.726 213.599  1.00  0.00           C
ATOM   2613  HA  ALA X 161     137.216 154.773 213.717  1.00  0.00           H
ATOM   2614  CB  ALA X 161     136.776 156.793 214.261  1.00  0.00           C
ATOM   2615  HB1 ALA X 161     136.806 156.734 215.349  1.00  0.00           H
ATOM   2616  HB2 ALA X 161     135.805 156.719 213.771  1.00  0.00           H
ATOM   2617  HB3 ALA X 161     137.050 157.812 213.987  1.00  0.00           H
ATOM   2618  C   ALA X 161     137.929 155.994 212.032  1.00  0.00           C
ATOM   2619  O   ALA X 161     137.365 156.922 211.507  1.00  0.00           O
ATOM   2620  N   SER X 162     138.702 155.094 211.315  1.00  0.00           N
ATOM   2621  H   SER X 162     139.174 154.421 211.902  1.00  0.00           H
ATOM   2622  CA  SER X 162     138.853 155.064 209.810  1.00  0.00           C
ATOM   2623  HA  SER X 162     138.252 155.844 209.344  1.00  0.00           H
ATOM   2624  CB  SER X 162     140.315 155.334 209.363  1.00  0.00           C
ATOM   2625  HB2 SER X 162     140.247 155.429 208.279  1.00  0.00           H
ATOM   2626  HB3 SER X 162     140.746 156.265 209.732  1.00  0.00           H
ATOM   2627  OG  SER X 162     141.228 154.288 209.725  1.00  0.00           O
ATOM   2628  HG  SER X 162     141.362 154.356 210.673  1.00  0.00           H
ATOM   2629  C   SER X 162     138.416 153.774 209.118  1.00  0.00           C
ATOM   2630  O   SER X 162     138.580 152.687 209.708  1.00  0.00           O
ATOM   2631  N   PRO X 163     137.830 153.767 207.915  1.00  0.00           N
ATOM   2632  CD  PRO X 163     137.275 154.899 207.222  1.00  0.00           C
ATOM   2633  HD2 PRO X 163     137.912 155.782 207.269  1.00  0.00           H
ATOM   2634  HD3 PRO X 163     136.273 155.141 207.576  1.00  0.00           H
ATOM   2635  CG  PRO X 163     137.010 154.371 205.790  1.00  0.00           C
ATOM   2636  HG2 PRO X 163     137.973 154.417 205.282  1.00  0.00           H
ATOM   2637  HG3 PRO X 163     136.234 154.977 205.322  1.00  0.00           H
ATOM   2638  CB  PRO X 163     136.544 152.868 206.008  1.00  0.00           C
ATOM   2639  HB2 PRO X 163     136.878 152.356 205.106  1.00  0.00           H
ATOM   2640  HB3 PRO X 163     135.484 152.706 206.203  1.00  0.00           H
ATOM   2641  CA  PRO X 163     137.525 152.554 207.170  1.00  0.00           C
ATOM   2642  HA  PRO X 163     137.068 151.867 207.882  1.00  0.00           H
ATOM   2643  C   PRO X 163     138.791 151.889 206.775  1.00  0.00           C
ATOM   2644  O   PRO X 163     139.684 152.445 206.119  1.00  0.00           O
ATOM   2645  N   CYS X 164     138.993 150.585 207.102  1.00  0.00           N
ATOM   2646  H   CYS X 164     138.231 150.134 207.589  1.00  0.00           H
ATOM   2647  CA  CYS X 164     140.024 149.586 206.669  1.00  0.00           C
ATOM   2648  HA  CYS X 164     140.206 149.780 205.612  1.00  0.00           H
ATOM   2649  CB  CYS X 164     141.258 149.731 207.549  1.00  0.00           C
ATOM   2650  HB2 CYS X 164     141.729 150.678 207.287  1.00  0.00           H
ATOM   2651  HB3 CYS X 164     140.998 149.744 208.607  1.00  0.00           H
ATOM   2652  SG  CYS X 164     142.433 148.413 207.190  1.00  0.00           S
ATOM   2653  HG  CYS X 164     141.675 147.513 207.822  1.00  0.00           H
ATOM   2654  C   CYS X 164     139.363 148.166 206.664  1.00  0.00           C
ATOM   2655  O   CYS X 164     138.430 147.962 207.387  1.00  0.00           O
ATOM   2656  N   ASP X 165     139.784 147.204 205.825  1.00  0.00           N
ATOM   2657  H   ASP X 165     140.532 147.380 205.170  1.00  0.00           H
ATOM   2658  CA  ASP X 165     139.410 145.769 205.838  1.00  0.00           C
ATOM   2659  HA  ASP X 165     138.344 145.672 205.629  1.00  0.00           H
ATOM   2660  CB  ASP X 165     140.158 145.002 204.706  1.00  0.00           C
ATOM   2661  HB2 ASP X 165     139.725 145.287 203.747  1.00  0.00           H
ATOM   2662  HB3 ASP X 165     141.240 145.057 204.826  1.00  0.00           H
ATOM   2663  CG  ASP X 165     139.859 143.538 204.850  1.00  0.00           C
ATOM   2664  OD1 ASP X 165     138.825 143.148 205.381  1.00  0.00           O
ATOM   2665  OD2 ASP X 165     140.615 142.796 204.317  1.00  0.00           O
ATOM   2666  C   ASP X 165     139.693 145.206 207.246  1.00  0.00           C
ATOM   2667  O   ASP X 165     140.840 145.194 207.684  1.00  0.00           O
ATOM   2668  N   PRO X 166     138.695 144.732 208.030  1.00  0.00           N
ATOM   2669  CD  PRO X 166     137.186 144.840 207.799  1.00  0.00           C
ATOM   2670  HD2 PRO X 166     136.971 144.364 206.843  1.00  0.00           H
ATOM   2671  HD3 PRO X 166     136.837 145.872 207.800  1.00  0.00           H
ATOM   2672  CG  PRO X 166     136.587 144.038 208.890  1.00  0.00           C
ATOM   2673  HG2 PRO X 166     136.478 142.992 208.603  1.00  0.00           H
ATOM   2674  HG3 PRO X 166     135.579 144.294 209.215  1.00  0.00           H
ATOM   2675  CB  PRO X 166     137.538 144.263 210.005  1.00  0.00           C
ATOM   2676  HB2 PRO X 166     137.349 143.626 210.869  1.00  0.00           H
ATOM   2677  HB3 PRO X 166     137.530 145.284 210.387  1.00  0.00           H
ATOM   2678  CA  PRO X 166     138.893 144.097 209.373  1.00  0.00           C
ATOM   2679  HA  PRO X 166     139.658 144.627 209.941  1.00  0.00           H
ATOM   2680  C   PRO X 166     139.424 142.602 209.228  1.00  0.00           C
ATOM   2681  O   PRO X 166     139.727 142.019 210.241  1.00  0.00           O
ATOM   2682  N   THR X 167     139.573 142.042 208.068  1.00  0.00           N
ATOM   2683  H   THR X 167     139.327 142.599 207.262  1.00  0.00           H
ATOM   2684  CA  THR X 167     139.970 140.599 207.937  1.00  0.00           C
ATOM   2685  HA  THR X 167     139.101 140.064 208.318  1.00  0.00           H
ATOM   2686  CB  THR X 167     140.170 140.176 206.414  1.00  0.00           C
ATOM   2687  HB  THR X 167     140.964 140.837 206.064  1.00  0.00           H
ATOM   2688  CG2 THR X 167     140.586 138.724 206.245  1.00  0.00           C
ATOM   2689 HG21 THR X 167     141.656 138.619 206.066  1.00  0.00           H
ATOM   2690 HG22 THR X 167     140.151 138.339 205.322  1.00  0.00           H
ATOM   2691 HG23 THR X 167     140.370 138.155 207.149  1.00  0.00           H
ATOM   2692  OG1 THR X 167     139.021 140.413 205.606  1.00  0.00           O
ATOM   2693  HG1 THR X 167     138.963 141.350 205.403  1.00  0.00           H
ATOM   2694  C   THR X 167     141.134 140.200 208.774  1.00  0.00           C
ATOM   2695  O   THR X 167     140.997 139.260 209.564  1.00  0.00           O
ATOM   2696  N   PHE X 168     142.300 140.782 208.446  1.00  0.00           N
ATOM   2697  H   PHE X 168     142.315 141.441 207.681  1.00  0.00           H
ATOM   2698  CA  PHE X 168     143.574 140.552 209.105  1.00  0.00           C
ATOM   2699  HA  PHE X 168     143.958 139.560 208.866  1.00  0.00           H
ATOM   2700  CB  PHE X 168     144.606 141.625 208.601  1.00  0.00           C
ATOM   2701  HB2 PHE X 168     144.506 141.743 207.522  1.00  0.00           H
ATOM   2702  HB3 PHE X 168     144.159 142.572 208.905  1.00  0.00           H
ATOM   2703  CG  PHE X 168     146.034 141.408 209.118  1.00  0.00           C
ATOM   2704  CD1 PHE X 168     146.402 142.192 210.248  1.00  0.00           C
ATOM   2705  HD1 PHE X 168     145.716 142.854 210.757  1.00  0.00           H
ATOM   2706  CE1 PHE X 168     147.661 141.988 210.872  1.00  0.00           C
ATOM   2707  HE1 PHE X 168     147.981 142.525 211.753  1.00  0.00           H
ATOM   2708  CZ  PHE X 168     148.602 141.194 210.224  1.00  0.00           C
ATOM   2709  HZ  PHE X 168     149.558 140.990 210.682  1.00  0.00           H
ATOM   2710  CE2 PHE X 168     148.279 140.494 209.053  1.00  0.00           C
ATOM   2711  HE2 PHE X 168     149.004 139.754 208.748  1.00  0.00           H
ATOM   2712  CD2 PHE X 168     146.984 140.547 208.496  1.00  0.00           C
ATOM   2713  HD2 PHE X 168     146.671 139.830 207.752  1.00  0.00           H
ATOM   2714  C   PHE X 168     143.359 140.618 210.607  1.00  0.00           C
ATOM   2715  O   PHE X 168     143.587 139.594 211.240  1.00  0.00           O
ATOM   2716  N   ILE X 169     142.857 141.730 211.216  1.00  0.00           N
ATOM   2717  H   ILE X 169     142.688 142.596 210.725  1.00  0.00           H
ATOM   2718  CA  ILE X 169     142.914 141.830 212.697  1.00  0.00           C
ATOM   2719  HA  ILE X 169     143.898 141.491 213.021  1.00  0.00           H
ATOM   2720  CB  ILE X 169     142.810 143.364 212.974  1.00  0.00           C
ATOM   2721  HB  ILE X 169     143.319 143.949 212.207  1.00  0.00           H
ATOM   2722  CG2 ILE X 169     141.357 143.929 212.976  1.00  0.00           C
ATOM   2723 HG21 ILE X 169     141.472 145.013 212.985  1.00  0.00           H
ATOM   2724 HG22 ILE X 169     140.758 143.551 213.805  1.00  0.00           H
ATOM   2725 HG23 ILE X 169     140.876 143.568 212.066  1.00  0.00           H
ATOM   2726  CG1 ILE X 169     143.424 143.637 214.379  1.00  0.00           C
ATOM   2727 HG12 ILE X 169     143.012 144.574 214.753  1.00  0.00           H
ATOM   2728 HG13 ILE X 169     143.224 142.821 215.074  1.00  0.00           H
ATOM   2729  CD1 ILE X 169     144.940 143.831 214.222  1.00  0.00           C
ATOM   2730 HD11 ILE X 169     145.554 143.793 215.122  1.00  0.00           H
ATOM   2731 HD12 ILE X 169     145.001 144.811 213.750  1.00  0.00           H
ATOM   2732 HD13 ILE X 169     145.361 143.086 213.546  1.00  0.00           H
ATOM   2733  C   ILE X 169     141.918 140.959 213.498  1.00  0.00           C
ATOM   2734  O   ILE X 169     142.027 140.480 214.625  1.00  0.00           O
ATOM   2735  N   LEU X 170     140.766 140.775 212.852  1.00  0.00           N
ATOM   2736  H   LEU X 170     140.500 141.307 212.036  1.00  0.00           H
ATOM   2737  CA  LEU X 170     139.715 139.813 213.361  1.00  0.00           C
ATOM   2738  HA  LEU X 170     139.653 140.014 214.430  1.00  0.00           H
ATOM   2739  CB  LEU X 170     138.340 140.071 212.721  1.00  0.00           C
ATOM   2740  HB2 LEU X 170     138.370 139.892 211.646  1.00  0.00           H
ATOM   2741  HB3 LEU X 170     137.733 139.291 213.181  1.00  0.00           H
ATOM   2742  CG  LEU X 170     137.691 141.417 212.960  1.00  0.00           C
ATOM   2743  HG  LEU X 170     138.355 142.162 212.520  1.00  0.00           H
ATOM   2744  CD1 LEU X 170     136.357 141.503 212.225  1.00  0.00           C
ATOM   2745 HD11 LEU X 170     136.369 141.180 211.184  1.00  0.00           H
ATOM   2746 HD12 LEU X 170     135.990 142.529 212.228  1.00  0.00           H
ATOM   2747 HD13 LEU X 170     135.690 140.962 212.896  1.00  0.00           H
ATOM   2748  CD2 LEU X 170     137.563 141.868 214.350  1.00  0.00           C
ATOM   2749 HD21 LEU X 170     138.529 141.976 214.845  1.00  0.00           H
ATOM   2750 HD22 LEU X 170     137.033 142.819 214.402  1.00  0.00           H
ATOM   2751 HD23 LEU X 170     137.042 141.105 214.929  1.00  0.00           H
ATOM   2752  C   LEU X 170     140.132 138.371 213.141  1.00  0.00           C
ATOM   2753  O   LEU X 170     139.731 137.521 213.956  1.00  0.00           O
ATOM   2754  N   GLY X 171     140.918 138.017 212.102  1.00  0.00           N
ATOM   2755  H   GLY X 171     141.074 138.729 211.403  1.00  0.00           H
ATOM   2756  CA  GLY X 171     141.665 136.784 212.089  1.00  0.00           C
ATOM   2757  HA2 GLY X 171     140.929 135.981 212.061  1.00  0.00           H
ATOM   2758  HA3 GLY X 171     142.193 136.845 211.137  1.00  0.00           H
ATOM   2759  C   GLY X 171     142.842 136.591 213.053  1.00  0.00           C
ATOM   2760  O   GLY X 171     143.059 135.453 213.485  1.00  0.00           O
ATOM   2761  N   CYS X 172     143.497 137.677 213.456  1.00  0.00           N
ATOM   2762  H   CYS X 172     143.299 138.578 213.044  1.00  0.00           H
ATOM   2763  CA  CYS X 172     144.677 137.591 214.390  1.00  0.00           C
ATOM   2764  HA  CYS X 172     145.440 136.984 213.902  1.00  0.00           H
ATOM   2765  CB  CYS X 172     145.344 139.008 214.469  1.00  0.00           C
ATOM   2766  HB2 CYS X 172     144.526 139.675 214.740  1.00  0.00           H
ATOM   2767  HB3 CYS X 172     146.105 138.996 215.248  1.00  0.00           H
ATOM   2768  SG  CYS X 172     146.199 139.613 212.979  1.00  0.00           S
ATOM   2769  HG  CYS X 172     145.168 139.620 212.129  1.00  0.00           H
ATOM   2770  C   CYS X 172     144.259 137.192 215.770  1.00  0.00           C
ATOM   2771  O   CYS X 172     144.952 136.400 216.410  1.00  0.00           O
ATOM   2772  N   ALA X 173     143.142 137.746 216.271  1.00  0.00           N
ATOM   2773  H   ALA X 173     142.738 138.574 215.858  1.00  0.00           H
ATOM   2774  CA  ALA X 173     142.833 137.562 217.708  1.00  0.00           C
ATOM   2775  HA  ALA X 173     143.726 137.699 218.317  1.00  0.00           H
ATOM   2776  CB  ALA X 173     141.705 138.595 217.953  1.00  0.00           C
ATOM   2777  HB1 ALA X 173     140.992 138.534 217.130  1.00  0.00           H
ATOM   2778  HB2 ALA X 173     142.073 139.618 217.875  1.00  0.00           H
ATOM   2779  HB3 ALA X 173     141.217 138.390 218.906  1.00  0.00           H
ATOM   2780  C   ALA X 173     142.505 136.094 218.125  1.00  0.00           C
ATOM   2781  O   ALA X 173     143.113 135.582 219.017  1.00  0.00           O
ATOM   2782  N   PRO X 174     141.603 135.404 217.427  1.00  0.00           N
ATOM   2783  CD  PRO X 174     140.698 135.931 216.369  1.00  0.00           C
ATOM   2784  HD2 PRO X 174     141.189 136.500 215.579  1.00  0.00           H
ATOM   2785  HD3 PRO X 174     139.883 136.468 216.856  1.00  0.00           H
ATOM   2786  CG  PRO X 174     140.048 134.764 215.752  1.00  0.00           C
ATOM   2787  HG2 PRO X 174     140.780 134.387 215.039  1.00  0.00           H
ATOM   2788  HG3 PRO X 174     139.143 135.014 215.199  1.00  0.00           H
ATOM   2789  CB  PRO X 174     139.949 133.797 216.968  1.00  0.00           C
ATOM   2790  HB2 PRO X 174     139.918 132.753 216.657  1.00  0.00           H
ATOM   2791  HB3 PRO X 174     139.049 133.950 217.565  1.00  0.00           H
ATOM   2792  CA  PRO X 174     141.239 134.034 217.791  1.00  0.00           C
ATOM   2793  HA  PRO X 174     140.962 133.953 218.842  1.00  0.00           H
ATOM   2794  C   PRO X 174     142.295 133.009 217.553  1.00  0.00           C
ATOM   2795  O   PRO X 174     142.541 132.029 218.295  1.00  0.00           O
ATOM   2796  N   CYS X 175     143.146 133.305 216.514  1.00  0.00           N
ATOM   2797  H   CYS X 175     143.038 134.137 215.953  1.00  0.00           H
ATOM   2798  CA  CYS X 175     144.419 132.689 216.195  1.00  0.00           C
ATOM   2799  HA  CYS X 175     144.267 131.614 216.096  1.00  0.00           H
ATOM   2800  CB  CYS X 175     145.030 133.325 214.920  1.00  0.00           C
ATOM   2801  HB2 CYS X 175     144.249 133.388 214.162  1.00  0.00           H
ATOM   2802  HB3 CYS X 175     145.257 134.369 215.136  1.00  0.00           H
ATOM   2803  SG  CYS X 175     146.521 132.325 214.586  1.00  0.00           S
ATOM   2804  HG  CYS X 175     145.933 131.189 214.200  1.00  0.00           H
ATOM   2805  C   CYS X 175     145.415 132.836 217.338  1.00  0.00           C
ATOM   2806  O   CYS X 175     145.741 131.845 217.941  1.00  0.00           O
ATOM   2807  N   ASN X 176     145.744 134.031 217.759  1.00  0.00           N
ATOM   2808  H   ASN X 176     145.313 134.801 217.268  1.00  0.00           H
ATOM   2809  CA  ASN X 176     146.584 134.253 218.972  1.00  0.00           C
ATOM   2810  HA  ASN X 176     147.496 133.693 218.766  1.00  0.00           H
ATOM   2811  CB  ASN X 176     146.992 135.754 219.060  1.00  0.00           C
ATOM   2812  HB2 ASN X 176     147.516 135.914 218.118  1.00  0.00           H
ATOM   2813  HB3 ASN X 176     146.087 136.358 219.140  1.00  0.00           H
ATOM   2814  CG  ASN X 176     147.878 136.010 220.283  1.00  0.00           C
ATOM   2815  OD1 ASN X 176     148.654 135.231 220.766  1.00  0.00           O
ATOM   2816  ND2 ASN X 176     147.774 137.196 220.759  1.00  0.00           N
ATOM   2817 HD21 ASN X 176     147.066 137.830 220.415  1.00  0.00           H
ATOM   2818 HD22 ASN X 176     148.526 137.624 221.280  1.00  0.00           H
ATOM   2819  C   ASN X 176     145.981 133.712 220.299  1.00  0.00           C
ATOM   2820  O   ASN X 176     146.702 133.068 221.137  1.00  0.00           O
ATOM   2821  N   VAL X 177     144.672 133.785 220.450  1.00  0.00           N
ATOM   2822  H   VAL X 177     144.210 134.491 219.895  1.00  0.00           H
ATOM   2823  CA  VAL X 177     143.958 133.195 221.595  1.00  0.00           C
ATOM   2824  HA  VAL X 177     144.504 133.527 222.478  1.00  0.00           H
ATOM   2825  CB  VAL X 177     142.433 133.639 221.860  1.00  0.00           C
ATOM   2826  HB  VAL X 177     142.218 134.489 221.213  1.00  0.00           H
ATOM   2827  CG1 VAL X 177     141.311 132.656 221.581  1.00  0.00           C
ATOM   2828 HG11 VAL X 177     141.033 131.987 222.395  1.00  0.00           H
ATOM   2829 HG12 VAL X 177     140.475 133.309 221.332  1.00  0.00           H
ATOM   2830 HG13 VAL X 177     141.467 132.157 220.624  1.00  0.00           H
ATOM   2831  CG2 VAL X 177     142.328 133.991 223.341  1.00  0.00           C
ATOM   2832 HG21 VAL X 177     142.996 134.800 223.636  1.00  0.00           H
ATOM   2833 HG22 VAL X 177     142.620 133.126 223.938  1.00  0.00           H
ATOM   2834 HG23 VAL X 177     141.326 134.417 223.399  1.00  0.00           H
ATOM   2835  C   VAL X 177     144.064 131.657 221.585  1.00  0.00           C
ATOM   2836  O   VAL X 177     144.553 131.201 222.655  1.00  0.00           O
ATOM   2837  N   ILE X 178     143.828 130.892 220.491  1.00  0.00           N
ATOM   2838  H   ILE X 178     143.455 131.281 219.637  1.00  0.00           H
ATOM   2839  CA  ILE X 178     144.032 129.443 220.584  1.00  0.00           C
ATOM   2840  HA  ILE X 178     143.566 129.099 221.507  1.00  0.00           H
ATOM   2841  CB  ILE X 178     143.332 128.761 219.337  1.00  0.00           C
ATOM   2842  HB  ILE X 178     142.357 129.199 219.124  1.00  0.00           H
ATOM   2843  CG2 ILE X 178     144.126 129.045 218.042  1.00  0.00           C
ATOM   2844 HG21 ILE X 178     145.182 128.813 218.176  1.00  0.00           H
ATOM   2845 HG22 ILE X 178     144.119 130.081 217.702  1.00  0.00           H
ATOM   2846 HG23 ILE X 178     143.853 128.419 217.193  1.00  0.00           H
ATOM   2847  CG1 ILE X 178     143.198 127.297 219.500  1.00  0.00           C
ATOM   2848 HG12 ILE X 178     142.754 126.916 218.580  1.00  0.00           H
ATOM   2849 HG13 ILE X 178     144.203 126.895 219.620  1.00  0.00           H
ATOM   2850  CD1 ILE X 178     142.264 126.913 220.697  1.00  0.00           C
ATOM   2851 HD11 ILE X 178     142.804 127.194 221.601  1.00  0.00           H
ATOM   2852 HD12 ILE X 178     142.219 125.833 220.834  1.00  0.00           H
ATOM   2853 HD13 ILE X 178     141.317 127.445 220.603  1.00  0.00           H
ATOM   2854  C   ILE X 178     145.546 129.159 220.833  1.00  0.00           C
ATOM   2855  O   ILE X 178     145.835 128.101 221.426  1.00  0.00           O
ATOM   2856  N   CYS X 179     146.535 129.972 220.441  1.00  0.00           N
ATOM   2857  H   CYS X 179     146.286 130.764 219.865  1.00  0.00           H
ATOM   2858  CA  CYS X 179     147.986 129.766 220.654  1.00  0.00           C
ATOM   2859  HA  CYS X 179     148.211 128.715 220.476  1.00  0.00           H
ATOM   2860  CB  CYS X 179     148.887 130.564 219.690  1.00  0.00           C
ATOM   2861  HB2 CYS X 179     148.706 131.639 219.717  1.00  0.00           H
ATOM   2862  HB3 CYS X 179     149.925 130.570 220.021  1.00  0.00           H
ATOM   2863  SG  CYS X 179     148.859 129.994 217.991  1.00  0.00           S
ATOM   2864  HG  CYS X 179     147.696 130.599 217.735  1.00  0.00           H
ATOM   2865  C   CYS X 179     148.271 130.091 222.171  1.00  0.00           C
ATOM   2866  O   CYS X 179     149.134 129.442 222.825  1.00  0.00           O
ATOM   2867  N   SER X 180     147.365 130.945 222.817  1.00  0.00           N
ATOM   2868  H   SER X 180     146.675 131.420 222.253  1.00  0.00           H
ATOM   2869  CA  SER X 180     147.533 131.378 224.234  1.00  0.00           C
ATOM   2870  HA  SER X 180     148.570 131.494 224.550  1.00  0.00           H
ATOM   2871  CB  SER X 180     146.909 132.742 224.318  1.00  0.00           C
ATOM   2872  HB2 SER X 180     147.668 133.391 223.881  1.00  0.00           H
ATOM   2873  HB3 SER X 180     146.074 132.868 223.629  1.00  0.00           H
ATOM   2874  OG  SER X 180     146.610 133.211 225.605  1.00  0.00           O
ATOM   2875  HG  SER X 180     146.154 134.031 225.399  1.00  0.00           H
ATOM   2876  C   SER X 180     146.831 130.395 225.209  1.00  0.00           C
ATOM   2877  O   SER X 180     147.215 130.332 226.396  1.00  0.00           O
ATOM   2878  N   ILE X 181     145.885 129.528 224.769  1.00  0.00           N
ATOM   2879  H   ILE X 181     145.597 129.590 223.803  1.00  0.00           H
ATOM   2880  CA  ILE X 181     145.319 128.432 225.512  1.00  0.00           C
ATOM   2881  HA  ILE X 181     145.211 128.875 226.502  1.00  0.00           H
ATOM   2882  CB  ILE X 181     143.950 128.112 224.844  1.00  0.00           C
ATOM   2883  HB  ILE X 181     143.997 127.962 223.766  1.00  0.00           H
ATOM   2884  CG2 ILE X 181     143.288 126.877 225.534  1.00  0.00           C
ATOM   2885 HG21 ILE X 181     143.862 126.004 225.222  1.00  0.00           H
ATOM   2886 HG22 ILE X 181     142.256 126.673 225.252  1.00  0.00           H
ATOM   2887 HG23 ILE X 181     143.502 126.856 226.603  1.00  0.00           H
ATOM   2888  CG1 ILE X 181     142.970 129.361 225.085  1.00  0.00           C
ATOM   2889 HG12 ILE X 181     142.484 129.286 226.058  1.00  0.00           H
ATOM   2890 HG13 ILE X 181     143.528 130.282 225.251  1.00  0.00           H
ATOM   2891  CD1 ILE X 181     141.775 129.557 224.023  1.00  0.00           C
ATOM   2892 HD11 ILE X 181     141.060 130.249 224.467  1.00  0.00           H
ATOM   2893 HD12 ILE X 181     141.389 128.562 223.799  1.00  0.00           H
ATOM   2894 HD13 ILE X 181     142.257 130.053 223.181  1.00  0.00           H
ATOM   2895  C   ILE X 181     146.269 127.250 225.556  1.00  0.00           C
ATOM   2896  O   ILE X 181     146.305 126.592 226.518  1.00  0.00           O
ATOM   2897  N   ILE X 182     146.998 126.921 224.481  1.00  0.00           N
ATOM   2898  H   ILE X 182     146.945 127.543 223.687  1.00  0.00           H
ATOM   2899  CA  ILE X 182     147.673 125.605 224.179  1.00  0.00           C
ATOM   2900  HA  ILE X 182     147.286 124.882 224.897  1.00  0.00           H
ATOM   2901  CB  ILE X 182     147.349 125.261 222.701  1.00  0.00           C
ATOM   2902  HB  ILE X 182     147.352 126.162 222.089  1.00  0.00           H
ATOM   2903  CG2 ILE X 182     148.311 124.214 222.063  1.00  0.00           C
ATOM   2904 HG21 ILE X 182     148.225 123.314 222.672  1.00  0.00           H
ATOM   2905 HG22 ILE X 182     149.329 124.605 222.054  1.00  0.00           H
ATOM   2906 HG23 ILE X 182     148.014 124.137 221.017  1.00  0.00           H
ATOM   2907  CG1 ILE X 182     145.931 124.588 222.768  1.00  0.00           C
ATOM   2908 HG12 ILE X 182     146.021 123.658 223.329  1.00  0.00           H
ATOM   2909 HG13 ILE X 182     145.261 125.238 223.331  1.00  0.00           H
ATOM   2910  CD1 ILE X 182     145.248 124.319 221.465  1.00  0.00           C
ATOM   2911 HD11 ILE X 182     145.640 123.394 221.041  1.00  0.00           H
ATOM   2912 HD12 ILE X 182     145.280 125.192 220.814  1.00  0.00           H
ATOM   2913 HD13 ILE X 182     144.210 124.023 221.616  1.00  0.00           H
ATOM   2914  C   ILE X 182     149.167 125.699 224.545  1.00  0.00           C
ATOM   2915  O   ILE X 182     149.736 124.663 224.966  1.00  0.00           O
ATOM   2916  N   PHE X 183     149.781 126.841 224.365  1.00  0.00           N
ATOM   2917  H   PHE X 183     149.210 127.550 223.929  1.00  0.00           H
ATOM   2918  CA  PHE X 183     151.139 127.243 224.822  1.00  0.00           C
ATOM   2919  HA  PHE X 183     151.739 126.344 224.964  1.00  0.00           H
ATOM   2920  CB  PHE X 183     151.959 128.018 223.706  1.00  0.00           C
ATOM   2921  HB2 PHE X 183     151.562 129.024 223.575  1.00  0.00           H
ATOM   2922  HB3 PHE X 183     152.960 128.154 224.116  1.00  0.00           H
ATOM   2923  CG  PHE X 183     152.004 127.235 222.394  1.00  0.00           C
ATOM   2924  CD1 PHE X 183     152.139 125.845 222.344  1.00  0.00           C
ATOM   2925  HD1 PHE X 183     152.139 125.239 223.238  1.00  0.00           H
ATOM   2926  CE1 PHE X 183     152.214 125.174 221.087  1.00  0.00           C
ATOM   2927  HE1 PHE X 183     152.380 124.110 221.004  1.00  0.00           H
ATOM   2928  CZ  PHE X 183     152.070 125.961 219.901  1.00  0.00           C
ATOM   2929  HZ  PHE X 183     152.031 125.527 218.913  1.00  0.00           H
ATOM   2930  CE2 PHE X 183     151.831 127.332 219.929  1.00  0.00           C
ATOM   2931  HE2 PHE X 183     151.713 127.961 219.059  1.00  0.00           H
ATOM   2932  CD2 PHE X 183     151.833 127.927 221.221  1.00  0.00           C
ATOM   2933  HD2 PHE X 183     151.498 128.951 221.303  1.00  0.00           H
ATOM   2934  C   PHE X 183     151.023 128.021 226.099  1.00  0.00           C
ATOM   2935  O   PHE X 183     149.926 128.514 226.478  1.00  0.00           O
ATOM   2936  N   GLN X 184     152.082 128.256 226.861  1.00  0.00           N
ATOM   2937  H   GLN X 184     152.992 127.866 226.662  1.00  0.00           H
ATOM   2938  CA  GLN X 184     151.959 128.950 228.154  1.00  0.00           C
ATOM   2939  HA  GLN X 184     151.299 128.394 228.820  1.00  0.00           H
ATOM   2940  CB  GLN X 184     153.351 128.796 228.839  1.00  0.00           C
ATOM   2941  HB2 GLN X 184     153.734 127.787 228.992  1.00  0.00           H
ATOM   2942  HB3 GLN X 184     154.105 129.219 228.175  1.00  0.00           H
ATOM   2943  CG  GLN X 184     153.415 129.545 230.214  1.00  0.00           C
ATOM   2944  HG2 GLN X 184     153.209 130.568 229.898  1.00  0.00           H
ATOM   2945  HG3 GLN X 184     152.574 129.123 230.763  1.00  0.00           H
ATOM   2946  CD  GLN X 184     154.729 129.421 231.117  1.00  0.00           C
ATOM   2947  OE1 GLN X 184     155.157 128.297 231.381  1.00  0.00           O
ATOM   2948  NE2 GLN X 184     155.236 130.441 231.693  1.00  0.00           N
ATOM   2949 HE21 GLN X 184     156.116 130.335 232.177  1.00  0.00           H
ATOM   2950 HE22 GLN X 184     154.659 131.259 231.562  1.00  0.00           H
ATOM   2951  C   GLN X 184     151.534 130.467 228.107  1.00  0.00           C
ATOM   2952  O   GLN X 184     150.585 130.835 228.809  1.00  0.00           O
ATOM   2953  N   LYS X 185     152.176 131.362 227.265  1.00  0.00           N
ATOM   2954  H   LYS X 185     152.975 131.037 226.740  1.00  0.00           H
ATOM   2955  CA  LYS X 185     151.822 132.827 227.159  1.00  0.00           C
ATOM   2956  HA  LYS X 185     150.946 133.070 227.761  1.00  0.00           H
ATOM   2957  CB  LYS X 185     152.726 133.750 228.005  1.00  0.00           C
ATOM   2958  HB2 LYS X 185     152.215 134.698 228.173  1.00  0.00           H
ATOM   2959  HB3 LYS X 185     152.867 133.342 229.006  1.00  0.00           H
ATOM   2960  CG  LYS X 185     154.074 133.831 227.240  1.00  0.00           C
ATOM   2961  HG2 LYS X 185     154.502 132.830 227.181  1.00  0.00           H
ATOM   2962  HG3 LYS X 185     153.924 134.164 226.213  1.00  0.00           H
ATOM   2963  CD  LYS X 185     155.043 134.840 227.810  1.00  0.00           C
ATOM   2964  HD2 LYS X 185     155.195 134.449 228.816  1.00  0.00           H
ATOM   2965  HD3 LYS X 185     155.972 134.801 227.243  1.00  0.00           H
ATOM   2966  CE  LYS X 185     154.420 136.251 227.726  1.00  0.00           C
ATOM   2967  HE2 LYS X 185     154.213 136.456 226.676  1.00  0.00           H
ATOM   2968  HE3 LYS X 185     153.476 136.208 228.269  1.00  0.00           H
ATOM   2969  NZ  LYS X 185     155.288 137.266 228.387  1.00  0.00           N
ATOM   2970  HZ1 LYS X 185     154.730 137.954 228.873  1.00  0.00           H
ATOM   2971  HZ2 LYS X 185     155.828 137.764 227.694  1.00  0.00           H
ATOM   2972  HZ3 LYS X 185     155.944 136.932 229.077  1.00  0.00           H
ATOM   2973  C   LYS X 185     151.577 133.250 225.684  1.00  0.00           C
ATOM   2974  O   LYS X 185     151.753 132.438 224.738  1.00  0.00           O
ATOM   2975  N   ARG X 186     151.031 134.414 225.460  1.00  0.00           N
ATOM   2976  H   ARG X 186     150.632 134.785 226.311  1.00  0.00           H
ATOM   2977  CA  ARG X 186     150.627 134.913 224.118  1.00  0.00           C
ATOM   2978  HA  ARG X 186     150.290 134.057 223.535  1.00  0.00           H
ATOM   2979  CB  ARG X 186     149.412 135.885 224.317  1.00  0.00           C
ATOM   2980  HB2 ARG X 186     148.916 135.875 223.347  1.00  0.00           H
ATOM   2981  HB3 ARG X 186     148.617 135.450 224.924  1.00  0.00           H
ATOM   2982  CG  ARG X 186     149.790 137.260 224.919  1.00  0.00           C
ATOM   2983  HG2 ARG X 186     150.147 137.151 225.943  1.00  0.00           H
ATOM   2984  HG3 ARG X 186     150.428 137.801 224.220  1.00  0.00           H
ATOM   2985  CD  ARG X 186     148.534 138.118 225.142  1.00  0.00           C
ATOM   2986  HD2 ARG X 186     147.829 137.645 225.826  1.00  0.00           H
ATOM   2987  HD3 ARG X 186     148.920 139.007 225.640  1.00  0.00           H
ATOM   2988  NE  ARG X 186     147.752 138.515 223.927  1.00  0.00           N
ATOM   2989  HE  ARG X 186     147.011 137.884 223.659  1.00  0.00           H
ATOM   2990  CZ  ARG X 186     147.845 139.620 223.241  1.00  0.00           C
ATOM   2991  NH1 ARG X 186     148.755 140.466 223.529  1.00  0.00           N
ATOM   2992 HH11 ARG X 186     149.528 140.182 224.114  1.00  0.00           H
ATOM   2993 HH12 ARG X 186     148.765 141.361 223.063  1.00  0.00           H
ATOM   2994  NH2 ARG X 186     147.081 139.829 222.181  1.00  0.00           N
ATOM   2995 HH21 ARG X 186     146.341 139.152 222.062  1.00  0.00           H
ATOM   2996 HH22 ARG X 186     147.270 140.616 221.577  1.00  0.00           H
ATOM   2997  C   ARG X 186     151.726 135.498 223.304  1.00  0.00           C
ATOM   2998  O   ARG X 186     152.774 135.739 223.809  1.00  0.00           O
ATOM   2999  N   PHE X 187     151.409 135.779 222.025  1.00  0.00           N
ATOM   3000  H   PHE X 187     150.450 135.561 221.797  1.00  0.00           H
ATOM   3001  CA  PHE X 187     152.145 136.702 221.039  1.00  0.00           C
ATOM   3002  HA  PHE X 187     153.188 136.752 221.353  1.00  0.00           H
ATOM   3003  CB  PHE X 187     151.905 136.106 219.641  1.00  0.00           C
ATOM   3004  HB2 PHE X 187     150.842 136.251 219.445  1.00  0.00           H
ATOM   3005  HB3 PHE X 187     152.433 136.801 218.987  1.00  0.00           H
ATOM   3006  CG  PHE X 187     152.472 134.740 219.351  1.00  0.00           C
ATOM   3007  CD1 PHE X 187     153.855 134.537 219.186  1.00  0.00           C
ATOM   3008  HD1 PHE X 187     154.542 135.369 219.243  1.00  0.00           H
ATOM   3009  CE1 PHE X 187     154.275 133.219 218.784  1.00  0.00           C
ATOM   3010  HE1 PHE X 187     155.330 132.992 218.737  1.00  0.00           H
ATOM   3011  CZ  PHE X 187     153.319 132.186 218.639  1.00  0.00           C
ATOM   3012  HZ  PHE X 187     153.711 131.192 218.480  1.00  0.00           H
ATOM   3013  CE2 PHE X 187     151.986 132.431 218.767  1.00  0.00           C
ATOM   3014  HE2 PHE X 187     151.220 131.687 218.605  1.00  0.00           H
ATOM   3015  CD2 PHE X 187     151.561 133.698 219.207  1.00  0.00           C
ATOM   3016  HD2 PHE X 187     150.487 133.793 219.262  1.00  0.00           H
ATOM   3017  C   PHE X 187     151.468 138.075 221.133  1.00  0.00           C
ATOM   3018  O   PHE X 187     150.252 138.191 221.337  1.00  0.00           O
ATOM   3019  N   ASP X 188     152.228 139.154 220.857  1.00  0.00           N
ATOM   3020  H   ASP X 188     153.209 139.014 220.663  1.00  0.00           H
ATOM   3021  CA  ASP X 188     151.634 140.350 220.289  1.00  0.00           C
ATOM   3022  HA  ASP X 188     150.598 140.455 220.610  1.00  0.00           H
ATOM   3023  CB  ASP X 188     152.393 141.501 220.845  1.00  0.00           C
ATOM   3024  HB2 ASP X 188     152.383 141.449 221.934  1.00  0.00           H
ATOM   3025  HB3 ASP X 188     153.435 141.368 220.554  1.00  0.00           H
ATOM   3026  CG  ASP X 188     151.886 142.903 220.468  1.00  0.00           C
ATOM   3027  OD1 ASP X 188     150.719 142.946 220.099  1.00  0.00           O
ATOM   3028  OD2 ASP X 188     152.626 143.879 220.480  1.00  0.00           O
ATOM   3029  C   ASP X 188     151.715 140.166 218.738  1.00  0.00           C
ATOM   3030  O   ASP X 188     152.673 139.518 218.274  1.00  0.00           O
ATOM   3031  N   TYR X 189     150.755 140.808 217.939  1.00  0.00           N
ATOM   3032  H   TYR X 189     149.978 141.255 218.405  1.00  0.00           H
ATOM   3033  CA  TYR X 189     150.623 140.662 216.505  1.00  0.00           C
ATOM   3034  HA  TYR X 189     150.407 139.647 216.170  1.00  0.00           H
ATOM   3035  CB  TYR X 189     149.448 141.629 216.276  1.00  0.00           C
ATOM   3036  HB2 TYR X 189     149.897 142.605 216.460  1.00  0.00           H
ATOM   3037  HB3 TYR X 189     149.210 141.672 215.213  1.00  0.00           H
ATOM   3038  CG  TYR X 189     148.240 141.452 217.191  1.00  0.00           C
ATOM   3039  CD1 TYR X 189     147.884 142.454 218.073  1.00  0.00           C
ATOM   3040  HD1 TYR X 189     148.315 143.439 218.175  1.00  0.00           H
ATOM   3041  CE1 TYR X 189     146.795 142.206 218.934  1.00  0.00           C
ATOM   3042  HE1 TYR X 189     146.370 143.010 219.517  1.00  0.00           H
ATOM   3043  CZ  TYR X 189     146.059 140.941 218.872  1.00  0.00           C
ATOM   3044  OH  TYR X 189     144.959 140.791 219.632  1.00  0.00           O
ATOM   3045  HH  TYR X 189     144.955 139.835 219.721  1.00  0.00           H
ATOM   3046  CE2 TYR X 189     146.492 139.905 217.977  1.00  0.00           C
ATOM   3047  HE2 TYR X 189     145.995 138.947 218.020  1.00  0.00           H
ATOM   3048  CD2 TYR X 189     147.578 140.200 217.112  1.00  0.00           C
ATOM   3049  HD2 TYR X 189     147.876 139.450 216.394  1.00  0.00           H
ATOM   3050  C   TYR X 189     151.870 141.068 215.670  1.00  0.00           C
ATOM   3051  O   TYR X 189     151.833 141.028 214.432  1.00  0.00           O
ATOM   3052  N   LYS X 190     152.891 141.631 216.326  1.00  0.00           N
ATOM   3053  H   LYS X 190     152.713 141.740 217.314  1.00  0.00           H
ATOM   3054  CA  LYS X 190     154.230 142.108 215.860  1.00  0.00           C
ATOM   3055  HA  LYS X 190     154.154 142.468 214.833  1.00  0.00           H
ATOM   3056  CB  LYS X 190     154.852 143.154 216.889  1.00  0.00           C
ATOM   3057  HB2 LYS X 190     154.992 142.715 217.877  1.00  0.00           H
ATOM   3058  HB3 LYS X 190     155.816 143.440 216.469  1.00  0.00           H
ATOM   3059  CG  LYS X 190     154.075 144.448 217.132  1.00  0.00           C
ATOM   3060  HG2 LYS X 190     153.891 144.955 216.184  1.00  0.00           H
ATOM   3061  HG3 LYS X 190     153.065 144.168 217.433  1.00  0.00           H
ATOM   3062  CD  LYS X 190     154.757 145.394 218.125  1.00  0.00           C
ATOM   3063  HD2 LYS X 190     154.881 144.789 219.023  1.00  0.00           H
ATOM   3064  HD3 LYS X 190     155.705 145.768 217.738  1.00  0.00           H
ATOM   3065  CE  LYS X 190     153.952 146.644 218.514  1.00  0.00           C
ATOM   3066  HE2 LYS X 190     154.610 147.277 219.110  1.00  0.00           H
ATOM   3067  HE3 LYS X 190     153.726 147.232 217.624  1.00  0.00           H
ATOM   3068  NZ  LYS X 190     152.710 146.245 219.209  1.00  0.00           N
ATOM   3069  HZ1 LYS X 190     152.846 145.443 219.808  1.00  0.00           H
ATOM   3070  HZ2 LYS X 190     151.970 145.993 218.570  1.00  0.00           H
ATOM   3071  HZ3 LYS X 190     152.356 146.978 219.807  1.00  0.00           H
ATOM   3072  C   LYS X 190     155.284 140.952 215.913  1.00  0.00           C
ATOM   3073  O   LYS X 190     156.391 141.044 215.344  1.00  0.00           O
ATOM   3074  N   ASP X 191     155.051 139.870 216.652  1.00  0.00           N
ATOM   3075  H   ASP X 191     154.234 139.790 217.240  1.00  0.00           H
ATOM   3076  CA  ASP X 191     156.095 138.778 216.718  1.00  0.00           C
ATOM   3077  HA  ASP X 191     157.071 139.235 216.885  1.00  0.00           H
ATOM   3078  CB  ASP X 191     155.896 137.870 217.975  1.00  0.00           C
ATOM   3079  HB2 ASP X 191     155.981 138.440 218.900  1.00  0.00           H
ATOM   3080  HB3 ASP X 191     154.985 137.272 217.965  1.00  0.00           H
ATOM   3081  CG  ASP X 191     157.000 136.949 218.167  1.00  0.00           C
ATOM   3082  OD1 ASP X 191     157.863 136.705 217.282  1.00  0.00           O
ATOM   3083  OD2 ASP X 191     157.113 136.317 219.228  1.00  0.00           O
ATOM   3084  C   ASP X 191     156.270 138.008 215.373  1.00  0.00           C
ATOM   3085  O   ASP X 191     155.286 137.608 214.677  1.00  0.00           O
ATOM   3086  N   GLN X 192     157.545 138.013 214.963  1.00  0.00           N
ATOM   3087  H   GLN X 192     158.327 138.432 215.446  1.00  0.00           H
ATOM   3088  CA  GLN X 192     157.843 137.403 213.625  1.00  0.00           C
ATOM   3089  HA  GLN X 192     157.261 137.837 212.812  1.00  0.00           H
ATOM   3090  CB  GLN X 192     159.349 137.631 213.271  1.00  0.00           C
ATOM   3091  HB2 GLN X 192     159.479 138.642 212.884  1.00  0.00           H
ATOM   3092  HB3 GLN X 192     160.072 137.445 214.065  1.00  0.00           H
ATOM   3093  CG  GLN X 192     159.793 136.559 212.182  1.00  0.00           C
ATOM   3094  HG2 GLN X 192     159.698 135.614 212.717  1.00  0.00           H
ATOM   3095  HG3 GLN X 192     159.101 136.549 211.340  1.00  0.00           H
ATOM   3096  CD  GLN X 192     161.214 136.694 211.642  1.00  0.00           C
ATOM   3097  OE1 GLN X 192     162.168 136.228 212.254  1.00  0.00           O
ATOM   3098  NE2 GLN X 192     161.389 137.137 210.425  1.00  0.00           N
ATOM   3099 HE21 GLN X 192     162.318 137.026 210.044  1.00  0.00           H
ATOM   3100 HE22 GLN X 192     160.664 137.129 209.722  1.00  0.00           H
ATOM   3101  C   GLN X 192     157.379 135.915 213.602  1.00  0.00           C
ATOM   3102  O   GLN X 192     156.744 135.549 212.574  1.00  0.00           O
ATOM   3103  N   GLN X 193     157.544 135.175 214.678  1.00  0.00           N
ATOM   3104  H   GLN X 193     157.925 135.638 215.491  1.00  0.00           H
ATOM   3105  CA  GLN X 193     157.075 133.796 214.766  1.00  0.00           C
ATOM   3106  HA  GLN X 193     157.577 133.181 214.019  1.00  0.00           H
ATOM   3107  CB  GLN X 193     157.419 133.358 216.185  1.00  0.00           C
ATOM   3108  HB2 GLN X 193     158.505 133.424 216.246  1.00  0.00           H
ATOM   3109  HB3 GLN X 193     156.880 134.032 216.851  1.00  0.00           H
ATOM   3110  CG  GLN X 193     157.172 131.834 216.520  1.00  0.00           C
ATOM   3111  HG2 GLN X 193     157.594 131.657 217.509  1.00  0.00           H
ATOM   3112  HG3 GLN X 193     156.109 131.617 216.627  1.00  0.00           H
ATOM   3113  CD  GLN X 193     157.788 130.831 215.630  1.00  0.00           C
ATOM   3114  OE1 GLN X 193     158.909 131.033 215.201  1.00  0.00           O
ATOM   3115  NE2 GLN X 193     157.125 129.693 215.493  1.00  0.00           N
ATOM   3116 HE21 GLN X 193     157.626 128.911 215.097  1.00  0.00           H
ATOM   3117 HE22 GLN X 193     156.198 129.561 215.871  1.00  0.00           H
ATOM   3118  C   GLN X 193     155.507 133.653 214.551  1.00  0.00           C
ATOM   3119  O   GLN X 193     155.046 132.835 213.735  1.00  0.00           O
ATOM   3120  N   PHE X 194     154.702 134.552 215.213  1.00  0.00           N
ATOM   3121  H   PHE X 194     155.155 135.281 215.746  1.00  0.00           H
ATOM   3122  CA  PHE X 194     153.227 134.590 215.046  1.00  0.00           C
ATOM   3123  HA  PHE X 194     152.848 133.591 215.263  1.00  0.00           H
ATOM   3124  CB  PHE X 194     152.542 135.675 215.861  1.00  0.00           C
ATOM   3125  HB2 PHE X 194     152.724 135.507 216.923  1.00  0.00           H
ATOM   3126  HB3 PHE X 194     152.868 136.686 215.616  1.00  0.00           H
ATOM   3127  CG  PHE X 194     151.120 135.582 215.573  1.00  0.00           C
ATOM   3128  CD1 PHE X 194     150.347 134.481 215.980  1.00  0.00           C
ATOM   3129  HD1 PHE X 194     150.755 133.660 216.551  1.00  0.00           H
ATOM   3130  CE1 PHE X 194     148.922 134.489 215.697  1.00  0.00           C
ATOM   3131  HE1 PHE X 194     148.347 133.638 216.031  1.00  0.00           H
ATOM   3132  CZ  PHE X 194     148.300 135.552 215.134  1.00  0.00           C
ATOM   3133  HZ  PHE X 194     147.251 135.495 214.881  1.00  0.00           H
ATOM   3134  CE2 PHE X 194     149.050 136.662 214.727  1.00  0.00           C
ATOM   3135  HE2 PHE X 194     148.527 137.407 214.145  1.00  0.00           H
ATOM   3136  CD2 PHE X 194     150.399 136.710 214.969  1.00  0.00           C
ATOM   3137  HD2 PHE X 194     150.897 137.606 214.629  1.00  0.00           H
ATOM   3138  C   PHE X 194     152.799 134.807 213.584  1.00  0.00           C
ATOM   3139  O   PHE X 194     151.916 134.140 213.026  1.00  0.00           O
ATOM   3140  N   LEU X 195     153.360 135.797 212.930  1.00  0.00           N
ATOM   3141  H   LEU X 195     154.092 136.279 213.431  1.00  0.00           H
ATOM   3142  CA  LEU X 195     153.170 136.087 211.453  1.00  0.00           C
ATOM   3143  HA  LEU X 195     152.091 136.240 211.464  1.00  0.00           H
ATOM   3144  CB  LEU X 195     153.904 137.394 211.110  1.00  0.00           C
ATOM   3145  HB2 LEU X 195     154.968 137.214 211.263  1.00  0.00           H
ATOM   3146  HB3 LEU X 195     153.616 137.523 210.066  1.00  0.00           H
ATOM   3147  CG  LEU X 195     153.423 138.700 211.758  1.00  0.00           C
ATOM   3148  HG  LEU X 195     153.445 138.571 212.840  1.00  0.00           H
ATOM   3149  CD1 LEU X 195     154.437 139.757 211.575  1.00  0.00           C
ATOM   3150 HD11 LEU X 195     154.367 140.179 210.572  1.00  0.00           H
ATOM   3151 HD12 LEU X 195     155.439 139.374 211.768  1.00  0.00           H
ATOM   3152 HD13 LEU X 195     154.245 140.520 212.330  1.00  0.00           H
ATOM   3153  CD2 LEU X 195     152.036 139.092 211.214  1.00  0.00           C
ATOM   3154 HD21 LEU X 195     151.924 140.151 211.445  1.00  0.00           H
ATOM   3155 HD22 LEU X 195     152.120 138.909 210.142  1.00  0.00           H
ATOM   3156 HD23 LEU X 195     151.191 138.535 211.618  1.00  0.00           H
ATOM   3157  C   LEU X 195     153.541 134.984 210.497  1.00  0.00           C
ATOM   3158  O   LEU X 195     152.840 134.645 209.619  1.00  0.00           O
ATOM   3159  N   ASN X 196     154.600 134.300 210.875  1.00  0.00           N
ATOM   3160  H   ASN X 196     155.006 134.476 211.783  1.00  0.00           H
ATOM   3161  CA  ASN X 196     154.942 133.014 210.214  1.00  0.00           C
ATOM   3162  HA  ASN X 196     155.003 133.188 209.140  1.00  0.00           H
ATOM   3163  CB  ASN X 196     156.356 132.422 210.663  1.00  0.00           C
ATOM   3164  HB2 ASN X 196     156.564 132.748 211.682  1.00  0.00           H
ATOM   3165  HB3 ASN X 196     156.282 131.336 210.613  1.00  0.00           H
ATOM   3166  CG  ASN X 196     157.492 133.006 209.859  1.00  0.00           C
ATOM   3167  OD1 ASN X 196     157.860 132.470 208.811  1.00  0.00           O
ATOM   3168  ND2 ASN X 196     157.982 134.188 210.213  1.00  0.00           N
ATOM   3169 HD21 ASN X 196     157.562 134.679 210.990  1.00  0.00           H
ATOM   3170 HD22 ASN X 196     158.728 134.619 209.686  1.00  0.00           H
ATOM   3171  C   ASN X 196     153.897 131.910 210.379  1.00  0.00           C
ATOM   3172  O   ASN X 196     153.414 131.352 209.419  1.00  0.00           O
ATOM   3173  N   LEU X 197     153.466 131.672 211.644  1.00  0.00           N
ATOM   3174  H   LEU X 197     153.773 132.324 212.351  1.00  0.00           H
ATOM   3175  CA  LEU X 197     152.522 130.606 212.031  1.00  0.00           C
ATOM   3176  HA  LEU X 197     152.860 129.620 211.712  1.00  0.00           H
ATOM   3177  CB  LEU X 197     152.619 130.506 213.585  1.00  0.00           C
ATOM   3178  HB2 LEU X 197     153.629 130.236 213.892  1.00  0.00           H
ATOM   3179  HB3 LEU X 197     152.397 131.416 214.142  1.00  0.00           H
ATOM   3180  CG  LEU X 197     151.635 129.441 214.143  1.00  0.00           C
ATOM   3181  HG  LEU X 197     150.592 129.579 213.858  1.00  0.00           H
ATOM   3182  CD1 LEU X 197     152.076 128.015 213.771  1.00  0.00           C
ATOM   3183 HD11 LEU X 197     152.336 128.001 212.712  1.00  0.00           H
ATOM   3184 HD12 LEU X 197     151.281 127.326 214.055  1.00  0.00           H
ATOM   3185 HD13 LEU X 197     153.010 127.746 214.264  1.00  0.00           H
ATOM   3186  CD2 LEU X 197     151.717 129.607 215.665  1.00  0.00           C
ATOM   3187 HD21 LEU X 197     151.133 128.861 216.203  1.00  0.00           H
ATOM   3188 HD22 LEU X 197     152.709 129.429 216.079  1.00  0.00           H
ATOM   3189 HD23 LEU X 197     151.417 130.610 215.969  1.00  0.00           H
ATOM   3190  C   LEU X 197     151.056 130.824 211.513  1.00  0.00           C
ATOM   3191  O   LEU X 197     150.449 130.036 210.816  1.00  0.00           O
ATOM   3192  N   MET X 198     150.492 132.035 211.595  1.00  0.00           N
ATOM   3193  H   MET X 198     151.143 132.731 211.931  1.00  0.00           H
ATOM   3194  CA  MET X 198     149.157 132.564 211.158  1.00  0.00           C
ATOM   3195  HA  MET X 198     148.438 131.986 211.738  1.00  0.00           H
ATOM   3196  CB  MET X 198     149.012 133.977 211.576  1.00  0.00           C
ATOM   3197  HB2 MET X 198     148.903 134.059 212.658  1.00  0.00           H
ATOM   3198  HB3 MET X 198     149.913 134.532 211.316  1.00  0.00           H
ATOM   3199  CG  MET X 198     147.834 134.721 210.808  1.00  0.00           C
ATOM   3200  HG2 MET X 198     148.076 134.806 209.748  1.00  0.00           H
ATOM   3201  HG3 MET X 198     147.018 134.002 210.871  1.00  0.00           H
ATOM   3202  SD  MET X 198     147.297 136.213 211.558  1.00  0.00           S
ATOM   3203  CE  MET X 198     148.163 137.404 210.476  1.00  0.00           C
ATOM   3204  HE1 MET X 198     147.789 137.438 209.453  1.00  0.00           H
ATOM   3205  HE2 MET X 198     148.073 138.430 210.832  1.00  0.00           H
ATOM   3206  HE3 MET X 198     149.225 137.174 210.559  1.00  0.00           H
ATOM   3207  C   MET X 198     148.999 132.315 209.668  1.00  0.00           C
ATOM   3208  O   MET X 198     147.977 131.782 209.218  1.00  0.00           O
ATOM   3209  N   GLU X 199     150.007 132.653 208.930  1.00  0.00           N
ATOM   3210  H   GLU X 199     150.855 133.013 209.345  1.00  0.00           H
ATOM   3211  CA  GLU X 199     150.170 132.386 207.463  1.00  0.00           C
ATOM   3212  HA  GLU X 199     149.264 132.876 207.106  1.00  0.00           H
ATOM   3213  CB  GLU X 199     151.392 133.159 207.018  1.00  0.00           C
ATOM   3214  HB2 GLU X 199     151.370 134.227 207.234  1.00  0.00           H
ATOM   3215  HB3 GLU X 199     152.281 132.756 207.505  1.00  0.00           H
ATOM   3216  CG  GLU X 199     151.367 133.048 205.494  1.00  0.00           C
ATOM   3217  HG2 GLU X 199     152.270 133.531 205.119  1.00  0.00           H
ATOM   3218  HG3 GLU X 199     151.293 132.015 205.153  1.00  0.00           H
ATOM   3219  CD  GLU X 199     150.252 133.699 204.663  1.00  0.00           C
ATOM   3220  OE1 GLU X 199     149.445 134.436 205.296  1.00  0.00           O
ATOM   3221  OE2 GLU X 199     150.275 133.551 203.429  1.00  0.00           O
ATOM   3222  C   GLU X 199     150.021 130.844 207.153  1.00  0.00           C
ATOM   3223  O   GLU X 199     149.161 130.493 206.359  1.00  0.00           O
ATOM   3224  N   LYS X 200     150.935 130.005 207.689  1.00  0.00           N
ATOM   3225  H   LYS X 200     151.638 130.397 208.298  1.00  0.00           H
ATOM   3226  CA  LYS X 200     151.055 128.583 207.544  1.00  0.00           C
ATOM   3227  HA  LYS X 200     151.257 128.350 206.499  1.00  0.00           H
ATOM   3228  CB  LYS X 200     152.241 128.092 208.367  1.00  0.00           C
ATOM   3229  HB2 LYS X 200     152.262 128.411 209.409  1.00  0.00           H
ATOM   3230  HB3 LYS X 200     152.119 127.010 208.417  1.00  0.00           H
ATOM   3231  CG  LYS X 200     153.592 128.414 207.777  1.00  0.00           C
ATOM   3232  HG2 LYS X 200     153.701 127.793 206.887  1.00  0.00           H
ATOM   3233  HG3 LYS X 200     153.588 129.465 207.487  1.00  0.00           H
ATOM   3234  CD  LYS X 200     154.816 128.120 208.666  1.00  0.00           C
ATOM   3235  HD2 LYS X 200     154.522 128.239 209.709  1.00  0.00           H
ATOM   3236  HD3 LYS X 200     154.948 127.069 208.406  1.00  0.00           H
ATOM   3237  CE  LYS X 200     156.054 129.031 208.468  1.00  0.00           C
ATOM   3238  HE2 LYS X 200     155.756 130.008 208.847  1.00  0.00           H
ATOM   3239  HE3 LYS X 200     156.876 128.689 209.097  1.00  0.00           H
ATOM   3240  NZ  LYS X 200     156.596 129.008 207.066  1.00  0.00           N
ATOM   3241  HZ1 LYS X 200     155.913 129.345 206.402  1.00  0.00           H
ATOM   3242  HZ2 LYS X 200     156.738 128.058 206.754  1.00  0.00           H
ATOM   3243  HZ3 LYS X 200     157.453 129.528 206.941  1.00  0.00           H
ATOM   3244  C   LYS X 200     149.771 127.832 207.907  1.00  0.00           C
ATOM   3245  O   LYS X 200     149.477 126.896 207.233  1.00  0.00           O
ATOM   3246  N   LEU X 201     149.037 128.214 209.000  1.00  0.00           N
ATOM   3247  H   LEU X 201     149.396 128.877 209.672  1.00  0.00           H
ATOM   3248  CA  LEU X 201     147.724 127.708 209.391  1.00  0.00           C
ATOM   3249  HA  LEU X 201     147.870 126.635 209.513  1.00  0.00           H
ATOM   3250  CB  LEU X 201     147.076 128.303 210.690  1.00  0.00           C
ATOM   3251  HB2 LEU X 201     147.003 129.386 210.586  1.00  0.00           H
ATOM   3252  HB3 LEU X 201     146.085 127.916 210.929  1.00  0.00           H
ATOM   3253  CG  LEU X 201     147.958 127.970 211.926  1.00  0.00           C
ATOM   3254  HG  LEU X 201     148.963 127.905 211.510  1.00  0.00           H
ATOM   3255  CD1 LEU X 201     147.806 129.024 213.082  1.00  0.00           C
ATOM   3256 HD11 LEU X 201     148.255 129.962 212.754  1.00  0.00           H
ATOM   3257 HD12 LEU X 201     148.490 128.627 213.832  1.00  0.00           H
ATOM   3258 HD13 LEU X 201     146.849 129.120 213.595  1.00  0.00           H
ATOM   3259  CD2 LEU X 201     147.503 126.666 212.557  1.00  0.00           C
ATOM   3260 HD21 LEU X 201     146.525 126.823 213.011  1.00  0.00           H
ATOM   3261 HD22 LEU X 201     147.319 125.930 211.775  1.00  0.00           H
ATOM   3262 HD23 LEU X 201     148.208 126.405 213.347  1.00  0.00           H
ATOM   3263  C   LEU X 201     146.762 127.945 208.230  1.00  0.00           C
ATOM   3264  O   LEU X 201     145.881 127.112 207.928  1.00  0.00           O
ATOM   3265  N   ASN X 202     146.778 129.085 207.542  1.00  0.00           N
ATOM   3266  H   ASN X 202     147.496 129.774 207.718  1.00  0.00           H
ATOM   3267  CA  ASN X 202     145.964 129.441 206.357  1.00  0.00           C
ATOM   3268  HA  ASN X 202     144.958 129.101 206.600  1.00  0.00           H
ATOM   3269  CB  ASN X 202     145.679 130.996 206.218  1.00  0.00           C
ATOM   3270  HB2 ASN X 202     146.668 131.454 206.249  1.00  0.00           H
ATOM   3271  HB3 ASN X 202     145.341 131.172 205.196  1.00  0.00           H
ATOM   3272  CG  ASN X 202     144.722 131.517 207.253  1.00  0.00           C
ATOM   3273  OD1 ASN X 202     143.522 131.440 207.118  1.00  0.00           O
ATOM   3274  ND2 ASN X 202     145.095 131.992 208.450  1.00  0.00           N
ATOM   3275 HD21 ASN X 202     146.075 132.057 208.687  1.00  0.00           H
ATOM   3276 HD22 ASN X 202     144.449 132.334 209.147  1.00  0.00           H
ATOM   3277  C   ASN X 202     146.464 128.717 205.097  1.00  0.00           C
ATOM   3278  O   ASN X 202     145.740 127.881 204.585  1.00  0.00           O
ATOM   3279  N   GLU X 203     147.744 128.618 204.857  1.00  0.00           N
ATOM   3280  H   GLU X 203     148.438 129.137 205.376  1.00  0.00           H
ATOM   3281  CA  GLU X 203     148.170 127.696 203.827  1.00  0.00           C
ATOM   3282  HA  GLU X 203     147.832 128.036 202.848  1.00  0.00           H
ATOM   3283  CB  GLU X 203     149.681 127.737 203.703  1.00  0.00           C
ATOM   3284  HB2 GLU X 203     150.026 128.714 204.040  1.00  0.00           H
ATOM   3285  HB3 GLU X 203     150.272 127.299 204.506  1.00  0.00           H
ATOM   3286  CG  GLU X 203     150.307 127.440 202.330  1.00  0.00           C
ATOM   3287  HG2 GLU X 203     151.371 127.214 202.400  1.00  0.00           H
ATOM   3288  HG3 GLU X 203     149.778 126.540 202.018  1.00  0.00           H
ATOM   3289  CD  GLU X 203     150.315 128.465 201.302  1.00  0.00           C
ATOM   3290  OE1 GLU X 203     149.347 129.284 201.222  1.00  0.00           O
ATOM   3291  OE2 GLU X 203     151.291 128.572 200.559  1.00  0.00           O
ATOM   3292  C   GLU X 203     147.756 126.161 204.027  1.00  0.00           C
ATOM   3293  O   GLU X 203     147.408 125.511 203.033  1.00  0.00           O
ATOM   3294  N   ASN X 204     147.717 125.644 205.298  1.00  0.00           N
ATOM   3295  H   ASN X 204     148.205 126.134 206.034  1.00  0.00           H
ATOM   3296  CA  ASN X 204     147.152 124.367 205.664  1.00  0.00           C
ATOM   3297  HA  ASN X 204     147.538 123.602 204.990  1.00  0.00           H
ATOM   3298  CB  ASN X 204     147.507 124.047 207.092  1.00  0.00           C
ATOM   3299  HB2 ASN X 204     147.191 124.880 207.720  1.00  0.00           H
ATOM   3300  HB3 ASN X 204     146.953 123.149 207.365  1.00  0.00           H
ATOM   3301  CG  ASN X 204     148.948 123.614 207.377  1.00  0.00           C
ATOM   3302  OD1 ASN X 204     149.843 123.481 206.539  1.00  0.00           O
ATOM   3303  ND2 ASN X 204     149.242 123.218 208.584  1.00  0.00           N
ATOM   3304 HD21 ASN X 204     148.536 122.981 209.266  1.00  0.00           H
ATOM   3305 HD22 ASN X 204     150.173 122.849 208.713  1.00  0.00           H
ATOM   3306  C   ASN X 204     145.660 124.165 205.222  1.00  0.00           C
ATOM   3307  O   ASN X 204     145.302 123.073 204.934  1.00  0.00           O
ATOM   3308  N   ILE X 205     144.855 125.278 205.250  1.00  0.00           N
ATOM   3309  H   ILE X 205     145.313 126.171 205.360  1.00  0.00           H
ATOM   3310  CA  ILE X 205     143.479 125.324 204.756  1.00  0.00           C
ATOM   3311  HA  ILE X 205     143.030 124.357 204.983  1.00  0.00           H
ATOM   3312  CB  ILE X 205     142.743 126.491 205.373  1.00  0.00           C
ATOM   3313  HB  ILE X 205     143.222 127.442 205.143  1.00  0.00           H
ATOM   3314  CG2 ILE X 205     141.317 126.600 204.897  1.00  0.00           C
ATOM   3315 HG21 ILE X 205     141.028 127.506 205.428  1.00  0.00           H
ATOM   3316 HG22 ILE X 205     140.711 125.797 205.318  1.00  0.00           H
ATOM   3317 HG23 ILE X 205     141.122 126.629 203.825  1.00  0.00           H
ATOM   3318  CG1 ILE X 205     142.817 126.403 206.939  1.00  0.00           C
ATOM   3319 HG12 ILE X 205     142.225 125.507 207.129  1.00  0.00           H
ATOM   3320 HG13 ILE X 205     143.783 126.078 207.327  1.00  0.00           H
ATOM   3321  CD1 ILE X 205     142.453 127.628 207.848  1.00  0.00           C
ATOM   3322 HD11 ILE X 205     143.061 127.613 208.752  1.00  0.00           H
ATOM   3323 HD12 ILE X 205     141.406 127.575 208.148  1.00  0.00           H
ATOM   3324 HD13 ILE X 205     142.516 128.561 207.288  1.00  0.00           H
ATOM   3325  C   ILE X 205     143.512 125.390 203.217  1.00  0.00           C
ATOM   3326  O   ILE X 205     142.870 124.596 202.559  1.00  0.00           O
ATOM   3327  N   ARG X 206     144.393 126.212 202.619  1.00  0.00           N
ATOM   3328  H   ARG X 206     145.021 126.735 203.213  1.00  0.00           H
ATOM   3329  CA  ARG X 206     144.570 126.489 201.211  1.00  0.00           C
ATOM   3330  HA  ARG X 206     143.627 126.647 200.688  1.00  0.00           H
ATOM   3331  CB  ARG X 206     145.401 127.823 200.999  1.00  0.00           C
ATOM   3332  HB2 ARG X 206     146.325 127.840 201.577  1.00  0.00           H
ATOM   3333  HB3 ARG X 206     145.611 128.003 199.944  1.00  0.00           H
ATOM   3334  CG  ARG X 206     144.618 129.032 201.547  1.00  0.00           C
ATOM   3335  HG2 ARG X 206     143.601 129.021 201.155  1.00  0.00           H
ATOM   3336  HG3 ARG X 206     144.582 129.131 202.632  1.00  0.00           H
ATOM   3337  CD  ARG X 206     145.211 130.455 201.130  1.00  0.00           C
ATOM   3338  HD2 ARG X 206     145.182 130.534 200.043  1.00  0.00           H
ATOM   3339  HD3 ARG X 206     144.604 131.211 201.628  1.00  0.00           H
ATOM   3340  NE  ARG X 206     146.616 130.541 201.508  1.00  0.00           N
ATOM   3341  HE  ARG X 206     147.219 129.741 201.381  1.00  0.00           H
ATOM   3342  CZ  ARG X 206     147.111 131.571 202.104  1.00  0.00           C
ATOM   3343  NH1 ARG X 206     146.466 132.667 202.347  1.00  0.00           N
ATOM   3344 HH11 ARG X 206     145.502 132.793 202.072  1.00  0.00           H
ATOM   3345 HH12 ARG X 206     146.882 133.414 202.884  1.00  0.00           H
ATOM   3346  NH2 ARG X 206     148.354 131.544 202.366  1.00  0.00           N
ATOM   3347 HH21 ARG X 206     148.909 130.742 202.103  1.00  0.00           H
ATOM   3348 HH22 ARG X 206     148.718 132.290 202.941  1.00  0.00           H
ATOM   3349  C   ARG X 206     145.184 125.362 200.366  1.00  0.00           C
ATOM   3350  O   ARG X 206     145.164 125.355 199.125  1.00  0.00           O
ATOM   3351  N   ILE X 207     145.774 124.331 201.014  1.00  0.00           N
ATOM   3352  H   ILE X 207     146.038 124.532 201.968  1.00  0.00           H
ATOM   3353  CA  ILE X 207     146.228 123.017 200.369  1.00  0.00           C
ATOM   3354  HA  ILE X 207     146.420 123.204 199.313  1.00  0.00           H
ATOM   3355  CB  ILE X 207     147.516 122.560 200.988  1.00  0.00           C
ATOM   3356  HB  ILE X 207     147.314 122.730 202.045  1.00  0.00           H
ATOM   3357  CG2 ILE X 207     147.924 121.068 200.817  1.00  0.00           C
ATOM   3358 HG21 ILE X 207     148.753 120.857 201.492  1.00  0.00           H
ATOM   3359 HG22 ILE X 207     148.229 120.908 199.783  1.00  0.00           H
ATOM   3360 HG23 ILE X 207     147.115 120.368 201.028  1.00  0.00           H
ATOM   3361  CG1 ILE X 207     148.677 123.599 200.673  1.00  0.00           C
ATOM   3362 HG12 ILE X 207     149.043 123.422 199.661  1.00  0.00           H
ATOM   3363 HG13 ILE X 207     148.294 124.619 200.710  1.00  0.00           H
ATOM   3364  CD1 ILE X 207     149.847 123.503 201.681  1.00  0.00           C
ATOM   3365 HD11 ILE X 207     150.268 122.500 201.619  1.00  0.00           H
ATOM   3366 HD12 ILE X 207     149.425 123.613 202.680  1.00  0.00           H
ATOM   3367 HD13 ILE X 207     150.548 124.311 201.468  1.00  0.00           H
ATOM   3368  C   ILE X 207     145.106 121.967 200.341  1.00  0.00           C
ATOM   3369  O   ILE X 207     145.173 121.175 199.438  1.00  0.00           O
ATOM   3370  N   VAL X 208     144.073 122.071 201.168  1.00  0.00           N
ATOM   3371  H   VAL X 208     144.130 122.801 201.863  1.00  0.00           H
ATOM   3372  CA  VAL X 208     142.805 121.334 201.017  1.00  0.00           C
ATOM   3373  HA  VAL X 208     142.929 120.288 200.740  1.00  0.00           H
ATOM   3374  CB  VAL X 208     142.212 121.177 202.435  1.00  0.00           C
ATOM   3375  HB  VAL X 208     141.825 122.150 202.740  1.00  0.00           H
ATOM   3376  CG1 VAL X 208     141.023 120.178 202.251  1.00  0.00           C
ATOM   3377 HG11 VAL X 208     140.395 120.336 203.128  1.00  0.00           H
ATOM   3378 HG12 VAL X 208     140.446 120.418 201.357  1.00  0.00           H
ATOM   3379 HG13 VAL X 208     141.279 119.118 202.257  1.00  0.00           H
ATOM   3380  CG2 VAL X 208     143.184 120.540 203.449  1.00  0.00           C
ATOM   3381 HG21 VAL X 208     143.704 119.664 203.064  1.00  0.00           H
ATOM   3382 HG22 VAL X 208     142.668 120.223 204.355  1.00  0.00           H
ATOM   3383 HG23 VAL X 208     143.966 121.239 203.744  1.00  0.00           H
ATOM   3384  C   VAL X 208     141.826 122.061 200.094  1.00  0.00           C
ATOM   3385  O   VAL X 208     141.198 121.479 199.238  1.00  0.00           O
ATOM   3386  N   SER X 209     141.673 123.351 200.308  1.00  0.00           N
ATOM   3387  H   SER X 209     142.124 123.703 201.140  1.00  0.00           H
ATOM   3388  CA  SER X 209     140.727 124.241 199.593  1.00  0.00           C
ATOM   3389  HA  SER X 209     139.790 123.687 199.557  1.00  0.00           H
ATOM   3390  CB  SER X 209     140.618 125.411 200.533  1.00  0.00           C
ATOM   3391  HB2 SER X 209     140.426 125.129 201.569  1.00  0.00           H
ATOM   3392  HB3 SER X 209     141.568 125.943 200.487  1.00  0.00           H
ATOM   3393  OG  SER X 209     139.611 126.296 200.076  1.00  0.00           O
ATOM   3394  HG  SER X 209     139.909 127.086 200.532  1.00  0.00           H
ATOM   3395  C   SER X 209     141.171 124.727 198.192  1.00  0.00           C
ATOM   3396  O   SER X 209     141.735 125.822 197.989  1.00  0.00           O
ATOM   3397  N   THR X 210     141.119 123.814 197.213  1.00  0.00           N
ATOM   3398  H   THR X 210     140.943 122.863 197.504  1.00  0.00           H
ATOM   3399  CA  THR X 210     141.687 124.054 195.820  1.00  0.00           C
ATOM   3400  HA  THR X 210     141.549 125.121 195.648  1.00  0.00           H
ATOM   3401  CB  THR X 210     143.199 123.743 195.839  1.00  0.00           C
ATOM   3402  HB  THR X 210     143.700 124.495 196.450  1.00  0.00           H
ATOM   3403  CG2 THR X 210     143.499 122.435 196.534  1.00  0.00           C
ATOM   3404 HG21 THR X 210     142.952 121.633 196.039  1.00  0.00           H
ATOM   3405 HG22 THR X 210     143.214 122.601 197.573  1.00  0.00           H
ATOM   3406 HG23 THR X 210     144.554 122.208 196.686  1.00  0.00           H
ATOM   3407  OG1 THR X 210     143.798 123.804 194.549  1.00  0.00           O
ATOM   3408  HG1 THR X 210     144.023 124.713 194.337  1.00  0.00           H
ATOM   3409  C   THR X 210     141.062 123.267 194.642  1.00  0.00           C
ATOM   3410  O   THR X 210     140.554 122.126 194.853  1.00  0.00           O
ATOM   3411  N   PRO X 211     141.071 123.688 193.311  1.00  0.00           N
ATOM   3412  CD  PRO X 211     141.510 124.989 192.942  1.00  0.00           C
ATOM   3413  HD2 PRO X 211     142.556 124.938 192.639  1.00  0.00           H
ATOM   3414  HD3 PRO X 211     141.331 125.751 193.700  1.00  0.00           H
ATOM   3415  CG  PRO X 211     140.805 125.372 191.654  1.00  0.00           C
ATOM   3416  HG2 PRO X 211     141.367 126.063 191.027  1.00  0.00           H
ATOM   3417  HG3 PRO X 211     139.829 125.768 191.933  1.00  0.00           H
ATOM   3418  CB  PRO X 211     140.708 123.969 190.986  1.00  0.00           C
ATOM   3419  HB2 PRO X 211     141.583 123.914 190.338  1.00  0.00           H
ATOM   3420  HB3 PRO X 211     139.865 123.925 190.297  1.00  0.00           H
ATOM   3421  CA  PRO X 211     140.619 122.955 192.156  1.00  0.00           C
ATOM   3422  HA  PRO X 211     139.591 122.595 192.202  1.00  0.00           H
ATOM   3423  C   PRO X 211     141.601 121.847 191.784  1.00  0.00           C
ATOM   3424  O   PRO X 211     141.245 120.907 191.108  1.00  0.00           O
ATOM   3425  N   TRP X 212     142.818 121.928 192.386  1.00  0.00           N
ATOM   3426  H   TRP X 212     142.986 122.731 192.975  1.00  0.00           H
ATOM   3427  CA  TRP X 212     143.741 120.794 192.372  1.00  0.00           C
ATOM   3428  HA  TRP X 212     143.931 120.683 191.305  1.00  0.00           H
ATOM   3429  CB  TRP X 212     145.169 121.196 192.863  1.00  0.00           C
ATOM   3430  HB2 TRP X 212     145.294 122.242 192.584  1.00  0.00           H
ATOM   3431  HB3 TRP X 212     145.249 121.253 193.948  1.00  0.00           H
ATOM   3432  CG  TRP X 212     146.295 120.288 192.464  1.00  0.00           C
ATOM   3433  CD1 TRP X 212     147.101 119.563 193.241  1.00  0.00           C
ATOM   3434  HD1 TRP X 212     147.154 119.568 194.320  1.00  0.00           H
ATOM   3435  NE1 TRP X 212     148.108 118.928 192.487  1.00  0.00           N
ATOM   3436  HE1 TRP X 212     148.939 118.559 192.927  1.00  0.00           H
ATOM   3437  CE2 TRP X 212     147.804 119.047 191.155  1.00  0.00           C
ATOM   3438  CZ2 TRP X 212     148.366 118.508 189.988  1.00  0.00           C
ATOM   3439  HZ2 TRP X 212     149.227 117.857 190.004  1.00  0.00           H
ATOM   3440  CH2 TRP X 212     147.787 118.774 188.731  1.00  0.00           C
ATOM   3441  HH2 TRP X 212     148.159 118.308 187.830  1.00  0.00           H
ATOM   3442  CZ3 TRP X 212     146.801 119.747 188.690  1.00  0.00           C
ATOM   3443  HZ3 TRP X 212     146.397 120.064 187.740  1.00  0.00           H
ATOM   3444  CE3 TRP X 212     146.261 120.287 189.844  1.00  0.00           C
ATOM   3445  HE3 TRP X 212     145.416 120.956 189.768  1.00  0.00           H
ATOM   3446  CD2 TRP X 212     146.716 119.979 191.101  1.00  0.00           C
ATOM   3447  C   TRP X 212     143.180 119.477 193.013  1.00  0.00           C
ATOM   3448  O   TRP X 212     143.666 118.407 192.620  1.00  0.00           O
ATOM   3449  N   ILE X 213     142.146 119.533 193.923  1.00  0.00           N
ATOM   3450  H   ILE X 213     141.729 120.414 194.185  1.00  0.00           H
ATOM   3451  CA  ILE X 213     141.437 118.316 194.405  1.00  0.00           C
ATOM   3452  HA  ILE X 213     142.186 117.600 194.743  1.00  0.00           H
ATOM   3453  CB  ILE X 213     140.374 118.624 195.542  1.00  0.00           C
ATOM   3454  HB  ILE X 213     139.667 119.312 195.079  1.00  0.00           H
ATOM   3455  CG2 ILE X 213     139.465 117.433 195.886  1.00  0.00           C
ATOM   3456 HG21 ILE X 213     139.997 116.523 195.606  1.00  0.00           H
ATOM   3457 HG22 ILE X 213     138.640 117.591 195.190  1.00  0.00           H
ATOM   3458 HG23 ILE X 213     139.120 117.379 196.918  1.00  0.00           H
ATOM   3459  CG1 ILE X 213     140.861 119.422 196.787  1.00  0.00           C
ATOM   3460 HG12 ILE X 213     141.265 120.330 196.340  1.00  0.00           H
ATOM   3461 HG13 ILE X 213     139.988 119.666 197.392  1.00  0.00           H
ATOM   3462  CD1 ILE X 213     141.747 118.614 197.706  1.00  0.00           C
ATOM   3463 HD11 ILE X 213     141.940 119.040 198.690  1.00  0.00           H
ATOM   3464 HD12 ILE X 213     142.750 118.626 197.278  1.00  0.00           H
ATOM   3465 HD13 ILE X 213     141.306 117.622 197.795  1.00  0.00           H
ATOM   3466  C   ILE X 213     140.737 117.638 193.277  1.00  0.00           C
ATOM   3467  O   ILE X 213     140.610 116.378 193.225  1.00  0.00           O
ATOM   3468  N   GLN X 214     140.236 118.356 192.280  1.00  0.00           N
ATOM   3469  H   GLN X 214     140.340 119.361 192.288  1.00  0.00           H
ATOM   3470  CA  GLN X 214     139.541 117.802 191.139  1.00  0.00           C
ATOM   3471  HA  GLN X 214     138.583 117.331 191.359  1.00  0.00           H
ATOM   3472  CB  GLN X 214     138.967 118.863 190.150  1.00  0.00           C
ATOM   3473  HB2 GLN X 214     139.783 119.279 189.558  1.00  0.00           H
ATOM   3474  HB3 GLN X 214     138.305 118.322 189.474  1.00  0.00           H
ATOM   3475  CG  GLN X 214     138.113 120.100 190.618  1.00  0.00           C
ATOM   3476  HG2 GLN X 214     138.660 121.032 190.473  1.00  0.00           H
ATOM   3477  HG3 GLN X 214     137.305 120.027 189.891  1.00  0.00           H
ATOM   3478  CD  GLN X 214     137.531 120.081 191.982  1.00  0.00           C
ATOM   3479  OE1 GLN X 214     138.083 120.514 193.018  1.00  0.00           O
ATOM   3480  NE2 GLN X 214     136.332 119.579 192.150  1.00  0.00           N
ATOM   3481 HE21 GLN X 214     135.930 119.813 193.046  1.00  0.00           H
ATOM   3482 HE22 GLN X 214     135.786 119.213 191.383  1.00  0.00           H
ATOM   3483  C   GLN X 214     140.430 116.777 190.405  1.00  0.00           C
ATOM   3484  O   GLN X 214     139.856 115.907 189.779  1.00  0.00           O
ATOM   3485  N   ILE X 215     141.734 116.843 190.513  1.00  0.00           N
ATOM   3486  H   ILE X 215     142.083 117.713 190.888  1.00  0.00           H
ATOM   3487  CA  ILE X 215     142.727 115.936 189.894  1.00  0.00           C
ATOM   3488  HA  ILE X 215     142.326 115.297 189.107  1.00  0.00           H
ATOM   3489  CB  ILE X 215     143.841 116.802 189.170  1.00  0.00           C
ATOM   3490  HB  ILE X 215     144.031 117.581 189.908  1.00  0.00           H
ATOM   3491  CG2 ILE X 215     145.122 116.181 188.830  1.00  0.00           C
ATOM   3492 HG21 ILE X 215     145.421 115.523 189.646  1.00  0.00           H
ATOM   3493 HG22 ILE X 215     145.886 116.934 188.636  1.00  0.00           H
ATOM   3494 HG23 ILE X 215     144.988 115.611 187.910  1.00  0.00           H
ATOM   3495  CG1 ILE X 215     143.247 117.340 187.833  1.00  0.00           C
ATOM   3496 HG12 ILE X 215     143.921 117.916 187.198  1.00  0.00           H
ATOM   3497 HG13 ILE X 215     142.915 116.471 187.265  1.00  0.00           H
ATOM   3498  CD1 ILE X 215     141.949 118.227 187.874  1.00  0.00           C
ATOM   3499 HD11 ILE X 215     141.037 117.637 187.972  1.00  0.00           H
ATOM   3500 HD12 ILE X 215     141.845 118.690 186.893  1.00  0.00           H
ATOM   3501 HD13 ILE X 215     142.110 119.046 188.574  1.00  0.00           H
ATOM   3502  C   ILE X 215     143.220 114.902 190.972  1.00  0.00           C
ATOM   3503  O   ILE X 215     143.098 113.736 190.691  1.00  0.00           O
ATOM   3504  N   CYS X 216     143.898 115.311 192.031  1.00  0.00           N
ATOM   3505  H   CYS X 216     143.800 116.301 192.207  1.00  0.00           H
ATOM   3506  CA  CYS X 216     144.574 114.482 192.972  1.00  0.00           C
ATOM   3507  HA  CYS X 216     145.156 113.778 192.378  1.00  0.00           H
ATOM   3508  CB  CYS X 216     145.571 115.403 193.755  1.00  0.00           C
ATOM   3509  HB2 CYS X 216     146.256 114.794 194.344  1.00  0.00           H
ATOM   3510  HB3 CYS X 216     146.189 115.990 193.074  1.00  0.00           H
ATOM   3511  SG  CYS X 216     144.761 116.550 194.932  1.00  0.00           S
ATOM   3512  HG  CYS X 216     144.277 117.440 194.060  1.00  0.00           H
ATOM   3513  C   CYS X 216     143.698 113.528 193.868  1.00  0.00           C
ATOM   3514  O   CYS X 216     144.253 112.760 194.618  1.00  0.00           O
ATOM   3515  N   ASN X 217     142.366 113.550 193.720  1.00  0.00           N
ATOM   3516  H   ASN X 217     142.024 114.460 193.449  1.00  0.00           H
ATOM   3517  CA  ASN X 217     141.409 112.612 194.293  1.00  0.00           C
ATOM   3518  HA  ASN X 217     142.000 111.958 194.934  1.00  0.00           H
ATOM   3519  CB  ASN X 217     140.267 113.334 195.075  1.00  0.00           C
ATOM   3520  HB2 ASN X 217     139.723 114.011 194.417  1.00  0.00           H
ATOM   3521  HB3 ASN X 217     139.493 112.610 195.328  1.00  0.00           H
ATOM   3522  CG  ASN X 217     140.671 114.133 196.258  1.00  0.00           C
ATOM   3523  OD1 ASN X 217     141.697 114.744 196.314  1.00  0.00           O
ATOM   3524  ND2 ASN X 217     139.823 114.236 197.285  1.00  0.00           N
ATOM   3525 HD21 ASN X 217     139.019 113.626 197.272  1.00  0.00           H
ATOM   3526 HD22 ASN X 217     140.045 114.812 198.085  1.00  0.00           H
ATOM   3527  C   ASN X 217     140.717 111.728 193.295  1.00  0.00           C
ATOM   3528  O   ASN X 217     140.499 110.561 193.578  1.00  0.00           O
ATOM   3529  N   ASN X 218     140.588 112.199 192.050  1.00  0.00           N
ATOM   3530  H   ASN X 218     140.877 113.161 191.948  1.00  0.00           H
ATOM   3531  CA  ASN X 218     140.321 111.321 190.926  1.00  0.00           C
ATOM   3532  HA  ASN X 218     139.452 110.710 191.172  1.00  0.00           H
ATOM   3533  CB  ASN X 218     139.811 112.196 189.775  1.00  0.00           C
ATOM   3534  HB2 ASN X 218     140.422 113.087 189.629  1.00  0.00           H
ATOM   3535  HB3 ASN X 218     139.753 111.584 188.875  1.00  0.00           H
ATOM   3536  CG  ASN X 218     138.363 112.464 190.131  1.00  0.00           C
ATOM   3537  OD1 ASN X 218     137.549 111.549 190.194  1.00  0.00           O
ATOM   3538  ND2 ASN X 218     137.961 113.693 190.298  1.00  0.00           N
ATOM   3539 HD21 ASN X 218     138.655 114.417 190.185  1.00  0.00           H
ATOM   3540 HD22 ASN X 218     136.997 113.991 190.248  1.00  0.00           H
ATOM   3541  C   ASN X 218     141.457 110.408 190.568  1.00  0.00           C
ATOM   3542  O   ASN X 218     141.238 109.237 190.264  1.00  0.00           O
ATOM   3543  N   PHE X 219     142.684 110.948 190.590  1.00  0.00           N
ATOM   3544  H   PHE X 219     142.763 111.913 190.877  1.00  0.00           H
ATOM   3545  CA  PHE X 219     143.922 110.241 190.340  1.00  0.00           C
ATOM   3546  HA  PHE X 219     143.819 109.217 189.982  1.00  0.00           H
ATOM   3547  CB  PHE X 219     144.603 110.936 189.093  1.00  0.00           C
ATOM   3548  HB2 PHE X 219     144.787 112.002 189.227  1.00  0.00           H
ATOM   3549  HB3 PHE X 219     145.534 110.385 188.957  1.00  0.00           H
ATOM   3550  CG  PHE X 219     143.786 110.830 187.777  1.00  0.00           C
ATOM   3551  CD1 PHE X 219     143.616 109.547 187.210  1.00  0.00           C
ATOM   3552  HD1 PHE X 219     144.055 108.651 187.624  1.00  0.00           H
ATOM   3553  CE1 PHE X 219     143.053 109.501 185.936  1.00  0.00           C
ATOM   3554  HE1 PHE X 219     142.994 108.570 185.392  1.00  0.00           H
ATOM   3555  CZ  PHE X 219     142.502 110.611 185.290  1.00  0.00           C
ATOM   3556  HZ  PHE X 219     141.962 110.533 184.358  1.00  0.00           H
ATOM   3557  CE2 PHE X 219     142.542 111.919 185.883  1.00  0.00           C
ATOM   3558  HE2 PHE X 219     142.097 112.811 185.467  1.00  0.00           H
ATOM   3559  CD2 PHE X 219     143.250 112.025 187.129  1.00  0.00           C
ATOM   3560  HD2 PHE X 219     143.316 112.995 187.598  1.00  0.00           H
ATOM   3561  C   PHE X 219     144.949 110.362 191.480  1.00  0.00           C
ATOM   3562  O   PHE X 219     145.790 111.223 191.492  1.00  0.00           O
ATOM   3563  N   PRO X 220     144.742 109.653 192.623  1.00  0.00           N
ATOM   3564  CD  PRO X 220     143.752 108.604 192.833  1.00  0.00           C
ATOM   3565  HD2 PRO X 220     144.086 107.677 192.366  1.00  0.00           H
ATOM   3566  HD3 PRO X 220     142.785 108.971 192.489  1.00  0.00           H
ATOM   3567  CG  PRO X 220     143.696 108.520 194.280  1.00  0.00           C
ATOM   3568  HG2 PRO X 220     143.431 107.499 194.555  1.00  0.00           H
ATOM   3569  HG3 PRO X 220     142.978 109.232 194.686  1.00  0.00           H
ATOM   3570  CB  PRO X 220     145.142 108.798 194.781  1.00  0.00           C
ATOM   3571  HB2 PRO X 220     145.703 107.864 194.800  1.00  0.00           H
ATOM   3572  HB3 PRO X 220     145.102 109.166 195.806  1.00  0.00           H
ATOM   3573  CA  PRO X 220     145.682 109.766 193.708  1.00  0.00           C
ATOM   3574  HA  PRO X 220     145.641 110.816 193.998  1.00  0.00           H
ATOM   3575  C   PRO X 220     147.204 109.516 193.519  1.00  0.00           C
ATOM   3576  O   PRO X 220     148.061 109.737 194.392  1.00  0.00           O
ATOM   3577  N   THR X 221     147.703 108.970 192.356  1.00  0.00           N
ATOM   3578  H   THR X 221     147.008 108.697 191.676  1.00  0.00           H
ATOM   3579  CA  THR X 221     149.103 109.078 192.041  1.00  0.00           C
ATOM   3580  HA  THR X 221     149.638 108.517 192.808  1.00  0.00           H
ATOM   3581  CB  THR X 221     149.371 108.382 190.650  1.00  0.00           C
ATOM   3582  HB  THR X 221     150.308 108.721 190.208  1.00  0.00           H
ATOM   3583  CG2 THR X 221     149.603 106.822 190.741  1.00  0.00           C
ATOM   3584 HG21 THR X 221     150.489 106.646 191.351  1.00  0.00           H
ATOM   3585 HG22 THR X 221     149.705 106.363 189.758  1.00  0.00           H
ATOM   3586 HG23 THR X 221     148.666 106.342 191.024  1.00  0.00           H
ATOM   3587  OG1 THR X 221     148.487 108.676 189.615  1.00  0.00           O
ATOM   3588  HG1 THR X 221     147.649 108.265 189.840  1.00  0.00           H
ATOM   3589  C   THR X 221     149.598 110.448 191.992  1.00  0.00           C
ATOM   3590  O   THR X 221     150.755 110.714 192.106  1.00  0.00           O
ATOM   3591  N   ILE X 222     148.791 111.441 191.889  1.00  0.00           N
ATOM   3592  H   ILE X 222     147.799 111.273 191.810  1.00  0.00           H
ATOM   3593  CA  ILE X 222     149.231 112.793 191.893  1.00  0.00           C
ATOM   3594  HA  ILE X 222     150.162 112.862 191.331  1.00  0.00           H
ATOM   3595  CB  ILE X 222     148.255 113.725 191.188  1.00  0.00           C
ATOM   3596  HB  ILE X 222     147.336 113.773 191.772  1.00  0.00           H
ATOM   3597  CG2 ILE X 222     148.843 115.185 191.082  1.00  0.00           C
ATOM   3598 HG21 ILE X 222     148.776 115.686 192.048  1.00  0.00           H
ATOM   3599 HG22 ILE X 222     148.204 115.749 190.403  1.00  0.00           H
ATOM   3600 HG23 ILE X 222     149.848 115.248 190.665  1.00  0.00           H
ATOM   3601  CG1 ILE X 222     147.776 113.219 189.816  1.00  0.00           C
ATOM   3602 HG12 ILE X 222     147.263 112.301 190.101  1.00  0.00           H
ATOM   3603 HG13 ILE X 222     146.941 113.813 189.445  1.00  0.00           H
ATOM   3604  CD1 ILE X 222     148.840 112.827 188.701  1.00  0.00           C
ATOM   3605 HD11 ILE X 222     149.325 113.662 188.195  1.00  0.00           H
ATOM   3606 HD12 ILE X 222     148.373 112.103 188.033  1.00  0.00           H
ATOM   3607 HD13 ILE X 222     149.673 112.305 189.172  1.00  0.00           H
ATOM   3608  C   ILE X 222     149.767 113.187 193.335  1.00  0.00           C
ATOM   3609  O   ILE X 222     150.576 114.085 193.438  1.00  0.00           O
ATOM   3610  N   ILE X 223     149.500 112.446 194.403  1.00  0.00           N
ATOM   3611  H   ILE X 223     148.742 111.780 194.366  1.00  0.00           H
ATOM   3612  CA  ILE X 223     150.154 112.447 195.729  1.00  0.00           C
ATOM   3613  HA  ILE X 223     150.224 113.498 196.011  1.00  0.00           H
ATOM   3614  CB  ILE X 223     149.278 111.625 196.717  1.00  0.00           C
ATOM   3615  HB  ILE X 223     149.338 110.594 196.370  1.00  0.00           H
ATOM   3616  CG2 ILE X 223     149.849 111.598 198.157  1.00  0.00           C
ATOM   3617 HG21 ILE X 223     149.929 112.625 198.513  1.00  0.00           H
ATOM   3618 HG22 ILE X 223     150.905 111.333 198.208  1.00  0.00           H
ATOM   3619 HG23 ILE X 223     149.256 110.908 198.757  1.00  0.00           H
ATOM   3620  CG1 ILE X 223     147.786 112.135 196.663  1.00  0.00           C
ATOM   3621 HG12 ILE X 223     147.262 112.213 195.710  1.00  0.00           H
ATOM   3622 HG13 ILE X 223     147.207 111.386 197.203  1.00  0.00           H
ATOM   3623  CD1 ILE X 223     147.609 113.530 197.321  1.00  0.00           C
ATOM   3624 HD11 ILE X 223     148.320 114.242 196.902  1.00  0.00           H
ATOM   3625 HD12 ILE X 223     147.801 113.418 198.388  1.00  0.00           H
ATOM   3626 HD13 ILE X 223     146.598 113.912 197.182  1.00  0.00           H
ATOM   3627  C   ILE X 223     151.667 112.179 195.625  1.00  0.00           C
ATOM   3628  O   ILE X 223     152.346 112.548 196.581  1.00  0.00           O
ATOM   3629  N   ASP X 224     152.175 111.593 194.476  1.00  0.00           N
ATOM   3630  H   ASP X 224     151.521 111.443 193.721  1.00  0.00           H
ATOM   3631  CA  ASP X 224     153.574 111.155 194.211  1.00  0.00           C
ATOM   3632  HA  ASP X 224     154.186 111.678 194.946  1.00  0.00           H
ATOM   3633  CB  ASP X 224     153.830 109.690 194.504  1.00  0.00           C
ATOM   3634  HB2 ASP X 224     153.433 109.110 193.670  1.00  0.00           H
ATOM   3635  HB3 ASP X 224     154.910 109.636 194.364  1.00  0.00           H
ATOM   3636  CG  ASP X 224     153.420 109.135 195.863  1.00  0.00           C
ATOM   3637  OD1 ASP X 224     152.505 108.361 195.977  1.00  0.00           O
ATOM   3638  OD2 ASP X 224     153.984 109.533 196.875  1.00  0.00           O
ATOM   3639  C   ASP X 224     154.236 111.524 192.798  1.00  0.00           C
ATOM   3640  O   ASP X 224     155.472 111.670 192.794  1.00  0.00           O
ATOM   3641  N   TYR X 225     153.400 111.702 191.774  1.00  0.00           N
ATOM   3642  H   TYR X 225     152.467 111.363 191.959  1.00  0.00           H
ATOM   3643  CA  TYR X 225     153.813 112.186 190.469  1.00  0.00           C
ATOM   3644  HA  TYR X 225     154.762 111.760 190.142  1.00  0.00           H
ATOM   3645  CB  TYR X 225     152.831 111.710 189.420  1.00  0.00           C
ATOM   3646  HB2 TYR X 225     151.870 112.100 189.755  1.00  0.00           H
ATOM   3647  HB3 TYR X 225     153.037 112.127 188.434  1.00  0.00           H
ATOM   3648  CG  TYR X 225     152.711 110.225 189.087  1.00  0.00           C
ATOM   3649  CD1 TYR X 225     151.898 109.781 188.024  1.00  0.00           C
ATOM   3650  HD1 TYR X 225     151.363 110.444 187.360  1.00  0.00           H
ATOM   3651  CE1 TYR X 225     151.930 108.385 187.644  1.00  0.00           C
ATOM   3652  HE1 TYR X 225     151.336 107.999 186.829  1.00  0.00           H
ATOM   3653  CZ  TYR X 225     152.622 107.482 188.385  1.00  0.00           C
ATOM   3654  OH  TYR X 225     152.537 106.177 188.035  1.00  0.00           O
ATOM   3655  HH  TYR X 225     151.711 105.993 187.582  1.00  0.00           H
ATOM   3656  CE2 TYR X 225     153.220 107.908 189.551  1.00  0.00           C
ATOM   3657  HE2 TYR X 225     153.823 107.239 190.147  1.00  0.00           H
ATOM   3658  CD2 TYR X 225     153.365 109.253 189.846  1.00  0.00           C
ATOM   3659  HD2 TYR X 225     153.989 109.558 190.673  1.00  0.00           H
ATOM   3660  C   TYR X 225     154.089 113.712 190.473  1.00  0.00           C
ATOM   3661  O   TYR X 225     155.003 114.093 189.716  1.00  0.00           O
ATOM   3662  N   PHE X 226     153.388 114.438 191.310  1.00  0.00           N
ATOM   3663  H   PHE X 226     152.634 114.015 191.833  1.00  0.00           H
ATOM   3664  CA  PHE X 226     153.725 115.835 191.713  1.00  0.00           C
ATOM   3665  HA  PHE X 226     154.667 116.167 191.277  1.00  0.00           H
ATOM   3666  CB  PHE X 226     152.637 116.752 191.029  1.00  0.00           C
ATOM   3667  HB2 PHE X 226     152.789 116.606 189.960  1.00  0.00           H
ATOM   3668  HB3 PHE X 226     151.620 116.528 191.350  1.00  0.00           H
ATOM   3669  CG  PHE X 226     152.916 118.230 191.291  1.00  0.00           C
ATOM   3670  CD1 PHE X 226     152.052 119.017 192.067  1.00  0.00           C
ATOM   3671  HD1 PHE X 226     151.209 118.556 192.560  1.00  0.00           H
ATOM   3672  CE1 PHE X 226     152.306 120.374 192.221  1.00  0.00           C
ATOM   3673  HE1 PHE X 226     151.591 121.044 192.675  1.00  0.00           H
ATOM   3674  CZ  PHE X 226     153.447 120.962 191.588  1.00  0.00           C
ATOM   3675  HZ  PHE X 226     153.684 122.009 191.705  1.00  0.00           H
ATOM   3676  CE2 PHE X 226     154.300 120.187 190.731  1.00  0.00           C
ATOM   3677  HE2 PHE X 226     155.128 120.698 190.263  1.00  0.00           H
ATOM   3678  CD2 PHE X 226     154.032 118.796 190.591  1.00  0.00           C
ATOM   3679  HD2 PHE X 226     154.691 118.156 190.022  1.00  0.00           H
ATOM   3680  C   PHE X 226     153.520 116.012 193.276  1.00  0.00           C
ATOM   3681  O   PHE X 226     152.398 116.255 193.710  1.00  0.00           O
ATOM   3682  N   PRO X 227     154.527 115.904 194.105  1.00  0.00           N
ATOM   3683  CD  PRO X 227     155.810 115.148 193.892  1.00  0.00           C
ATOM   3684  HD2 PRO X 227     156.478 115.789 193.317  1.00  0.00           H
ATOM   3685  HD3 PRO X 227     155.657 114.223 193.336  1.00  0.00           H
ATOM   3686  CG  PRO X 227     156.426 114.890 195.331  1.00  0.00           C
ATOM   3687  HG2 PRO X 227     157.512 114.805 195.311  1.00  0.00           H
ATOM   3688  HG3 PRO X 227     156.059 113.954 195.752  1.00  0.00           H
ATOM   3689  CB  PRO X 227     155.912 116.053 196.121  1.00  0.00           C
ATOM   3690  HB2 PRO X 227     156.485 116.927 195.810  1.00  0.00           H
ATOM   3691  HB3 PRO X 227     155.789 115.856 197.186  1.00  0.00           H
ATOM   3692  CA  PRO X 227     154.535 116.266 195.537  1.00  0.00           C
ATOM   3693  HA  PRO X 227     153.819 115.671 196.104  1.00  0.00           H
ATOM   3694  C   PRO X 227     154.201 117.738 195.839  1.00  0.00           C
ATOM   3695  O   PRO X 227     153.873 118.045 196.979  1.00  0.00           O
ATOM   3696  N   GLY X 228     154.153 118.626 194.916  1.00  0.00           N
ATOM   3697  H   GLY X 228     154.412 118.375 193.972  1.00  0.00           H
ATOM   3698  CA  GLY X 228     153.685 119.987 195.133  1.00  0.00           C
ATOM   3699  HA2 GLY X 228     154.200 120.329 196.030  1.00  0.00           H
ATOM   3700  HA3 GLY X 228     154.111 120.691 194.418  1.00  0.00           H
ATOM   3701  C   GLY X 228     152.201 120.088 195.473  1.00  0.00           C
ATOM   3702  O   GLY X 228     151.793 121.165 195.854  1.00  0.00           O
ATOM   3703  N   THR X 229     151.462 118.986 195.328  1.00  0.00           N
ATOM   3704  H   THR X 229     151.989 118.158 195.090  1.00  0.00           H
ATOM   3705  CA  THR X 229     150.028 118.710 195.767  1.00  0.00           C
ATOM   3706  HA  THR X 229     149.321 119.432 195.359  1.00  0.00           H
ATOM   3707  CB  THR X 229     149.761 117.260 195.356  1.00  0.00           C
ATOM   3708  HB  THR X 229     150.568 116.671 195.791  1.00  0.00           H
ATOM   3709  CG2 THR X 229     148.436 116.736 195.822  1.00  0.00           C
ATOM   3710 HG21 THR X 229     148.486 116.401 196.858  1.00  0.00           H
ATOM   3711 HG22 THR X 229     148.134 115.878 195.221  1.00  0.00           H
ATOM   3712 HG23 THR X 229     147.666 117.497 195.693  1.00  0.00           H
ATOM   3713  OG1 THR X 229     149.885 117.134 193.960  1.00  0.00           O
ATOM   3714  HG1 THR X 229     150.695 116.621 193.904  1.00  0.00           H
ATOM   3715  C   THR X 229     149.844 118.869 197.245  1.00  0.00           C
ATOM   3716  O   THR X 229     148.753 119.155 197.735  1.00  0.00           O
ATOM   3717  N   HIE X 230     150.849 118.562 198.071  1.00  0.00           N
ATOM   3718  H   HIE X 230     151.759 118.577 197.631  1.00  0.00           H
ATOM   3719  CA  HIE X 230     150.794 118.533 199.544  1.00  0.00           C
ATOM   3720  HA  HIE X 230     150.191 119.411 199.777  1.00  0.00           H
ATOM   3721  CB  HIE X 230     150.157 117.190 199.941  1.00  0.00           C
ATOM   3722  HB2 HIE X 230     149.778 117.360 200.949  1.00  0.00           H
ATOM   3723  HB3 HIE X 230     149.405 116.791 199.260  1.00  0.00           H
ATOM   3724  CG  HIE X 230     151.205 116.136 199.950  1.00  0.00           C
ATOM   3725  ND1 HIE X 230     151.870 115.650 198.807  1.00  0.00           N
ATOM   3726  CE1 HIE X 230     152.587 114.621 199.243  1.00  0.00           C
ATOM   3727  HE1 HIE X 230     153.234 113.982 198.658  1.00  0.00           H
ATOM   3728  NE2 HIE X 230     152.499 114.570 200.617  1.00  0.00           N
ATOM   3729  HE2 HIE X 230     152.971 113.894 201.200  1.00  0.00           H
ATOM   3730  CD2 HIE X 230     151.621 115.475 201.071  1.00  0.00           C
ATOM   3731  HD2 HIE X 230     151.339 115.694 202.090  1.00  0.00           H
ATOM   3732  C   HIE X 230     152.113 118.725 200.374  1.00  0.00           C
ATOM   3733  O   HIE X 230     152.043 119.067 201.567  1.00  0.00           O
ATOM   3734  N   ASN X 231     153.348 118.567 199.801  1.00  0.00           N
ATOM   3735  H   ASN X 231     153.389 118.330 198.820  1.00  0.00           H
ATOM   3736  CA  ASN X 231     154.583 118.424 200.618  1.00  0.00           C
ATOM   3737  HA  ASN X 231     154.389 117.657 201.367  1.00  0.00           H
ATOM   3738  CB  ASN X 231     155.760 117.946 199.821  1.00  0.00           C
ATOM   3739  HB2 ASN X 231     156.461 117.412 200.462  1.00  0.00           H
ATOM   3740  HB3 ASN X 231     155.371 117.288 199.044  1.00  0.00           H
ATOM   3741  CG  ASN X 231     156.434 119.070 199.133  1.00  0.00           C
ATOM   3742  OD1 ASN X 231     157.269 119.737 199.675  1.00  0.00           O
ATOM   3743  ND2 ASN X 231     156.098 119.434 197.875  1.00  0.00           N
ATOM   3744 HD21 ASN X 231     155.259 119.031 197.481  1.00  0.00           H
ATOM   3745 HD22 ASN X 231     156.385 120.311 197.466  1.00  0.00           H
ATOM   3746  C   ASN X 231     154.915 119.662 201.507  1.00  0.00           C
ATOM   3747  O   ASN X 231     155.632 119.694 202.466  1.00  0.00           O
ATOM   3748  N   LYS X 232     154.412 120.874 201.110  1.00  0.00           N
ATOM   3749  H   LYS X 232     153.879 120.942 200.255  1.00  0.00           H
ATOM   3750  CA  LYS X 232     154.427 122.126 201.900  1.00  0.00           C
ATOM   3751  HA  LYS X 232     155.439 122.371 202.224  1.00  0.00           H
ATOM   3752  CB  LYS X 232     153.824 123.211 201.046  1.00  0.00           C
ATOM   3753  HB2 LYS X 232     154.310 123.282 200.073  1.00  0.00           H
ATOM   3754  HB3 LYS X 232     152.775 122.942 200.921  1.00  0.00           H
ATOM   3755  CG  LYS X 232     153.972 124.570 201.637  1.00  0.00           C
ATOM   3756  HG2 LYS X 232     153.277 124.602 202.476  1.00  0.00           H
ATOM   3757  HG3 LYS X 232     154.984 124.682 202.025  1.00  0.00           H
ATOM   3758  CD  LYS X 232     153.709 125.731 200.683  1.00  0.00           C
ATOM   3759  HD2 LYS X 232     152.725 125.547 200.252  1.00  0.00           H
ATOM   3760  HD3 LYS X 232     153.830 126.655 201.248  1.00  0.00           H
ATOM   3761  CE  LYS X 232     154.772 125.680 199.551  1.00  0.00           C
ATOM   3762  HE2 LYS X 232     155.779 125.864 199.926  1.00  0.00           H
ATOM   3763  HE3 LYS X 232     154.726 124.684 199.110  1.00  0.00           H
ATOM   3764  NZ  LYS X 232     154.467 126.744 198.559  1.00  0.00           N
ATOM   3765  HZ1 LYS X 232     153.471 126.853 198.435  1.00  0.00           H
ATOM   3766  HZ2 LYS X 232     154.867 126.607 197.642  1.00  0.00           H
ATOM   3767  HZ3 LYS X 232     154.816 127.657 198.812  1.00  0.00           H
ATOM   3768  C   LYS X 232     153.668 121.962 203.214  1.00  0.00           C
ATOM   3769  O   LYS X 232     154.002 122.634 204.203  1.00  0.00           O
ATOM   3770  N   LEU X 233     152.590 121.175 203.235  1.00  0.00           N
ATOM   3771  H   LEU X 233     152.344 120.655 202.405  1.00  0.00           H
ATOM   3772  CA  LEU X 233     151.802 120.968 204.503  1.00  0.00           C
ATOM   3773  HA  LEU X 233     151.443 121.876 204.988  1.00  0.00           H
ATOM   3774  CB  LEU X 233     150.519 120.171 204.060  1.00  0.00           C
ATOM   3775  HB2 LEU X 233     150.230 120.511 203.065  1.00  0.00           H
ATOM   3776  HB3 LEU X 233     150.746 119.118 203.894  1.00  0.00           H
ATOM   3777  CG  LEU X 233     149.326 120.336 204.964  1.00  0.00           C
ATOM   3778  HG  LEU X 233     149.080 121.392 204.859  1.00  0.00           H
ATOM   3779  CD1 LEU X 233     148.209 119.439 204.502  1.00  0.00           C
ATOM   3780 HD11 LEU X 233     148.666 118.451 204.557  1.00  0.00           H
ATOM   3781 HD12 LEU X 233     147.913 119.598 203.465  1.00  0.00           H
ATOM   3782 HD13 LEU X 233     147.338 119.552 205.148  1.00  0.00           H
ATOM   3783  CD2 LEU X 233     149.536 119.857 206.393  1.00  0.00           C
ATOM   3784 HD21 LEU X 233     148.615 119.715 206.960  1.00  0.00           H
ATOM   3785 HD22 LEU X 233     150.060 118.902 206.372  1.00  0.00           H
ATOM   3786 HD23 LEU X 233     150.157 120.574 206.931  1.00  0.00           H
ATOM   3787  C   LEU X 233     152.621 120.133 205.637  1.00  0.00           C
ATOM   3788  O   LEU X 233     152.803 120.585 206.776  1.00  0.00           O
ATOM   3789  N   LEU X 234     153.276 119.126 205.217  1.00  0.00           N
ATOM   3790  H   LEU X 234     153.079 118.926 204.247  1.00  0.00           H
ATOM   3791  CA  LEU X 234     154.302 118.395 206.010  1.00  0.00           C
ATOM   3792  HA  LEU X 234     153.952 117.989 206.959  1.00  0.00           H
ATOM   3793  CB  LEU X 234     154.799 117.177 205.253  1.00  0.00           C
ATOM   3794  HB2 LEU X 234     155.383 117.525 204.401  1.00  0.00           H
ATOM   3795  HB3 LEU X 234     155.583 116.615 205.760  1.00  0.00           H
ATOM   3796  CG  LEU X 234     153.763 116.198 204.767  1.00  0.00           C
ATOM   3797  HG  LEU X 234     153.089 116.890 204.263  1.00  0.00           H
ATOM   3798  CD1 LEU X 234     154.329 115.148 203.889  1.00  0.00           C
ATOM   3799 HD11 LEU X 234     153.645 114.317 203.716  1.00  0.00           H
ATOM   3800 HD12 LEU X 234     155.203 114.699 204.361  1.00  0.00           H
ATOM   3801 HD13 LEU X 234     154.540 115.650 202.944  1.00  0.00           H
ATOM   3802  CD2 LEU X 234     153.014 115.508 205.854  1.00  0.00           C
ATOM   3803 HD21 LEU X 234     153.521 114.754 206.456  1.00  0.00           H
ATOM   3804 HD22 LEU X 234     152.483 116.173 206.537  1.00  0.00           H
ATOM   3805 HD23 LEU X 234     152.136 115.050 205.399  1.00  0.00           H
ATOM   3806  C   LEU X 234     155.427 119.447 206.403  1.00  0.00           C
ATOM   3807  O   LEU X 234     155.715 119.542 207.582  1.00  0.00           O
ATOM   3808  N   LYS X 235     155.821 120.354 205.534  1.00  0.00           N
ATOM   3809  H   LYS X 235     155.401 120.302 204.617  1.00  0.00           H
ATOM   3810  CA  LYS X 235     156.787 121.374 205.867  1.00  0.00           C
ATOM   3811  HA  LYS X 235     157.553 120.830 206.419  1.00  0.00           H
ATOM   3812  CB  LYS X 235     157.397 122.030 204.685  1.00  0.00           C
ATOM   3813  HB2 LYS X 235     157.260 121.480 203.754  1.00  0.00           H
ATOM   3814  HB3 LYS X 235     156.842 122.944 204.472  1.00  0.00           H
ATOM   3815  CG  LYS X 235     158.926 122.408 204.885  1.00  0.00           C
ATOM   3816  HG2 LYS X 235     159.329 122.979 204.048  1.00  0.00           H
ATOM   3817  HG3 LYS X 235     159.127 122.877 205.848  1.00  0.00           H
ATOM   3818  CD  LYS X 235     159.781 121.154 205.034  1.00  0.00           C
ATOM   3819  HD2 LYS X 235     159.468 120.503 205.850  1.00  0.00           H
ATOM   3820  HD3 LYS X 235     159.611 120.629 204.094  1.00  0.00           H
ATOM   3821  CE  LYS X 235     161.191 121.682 205.273  1.00  0.00           C
ATOM   3822  HE2 LYS X 235     161.183 122.356 206.130  1.00  0.00           H
ATOM   3823  HE3 LYS X 235     161.824 120.844 205.567  1.00  0.00           H
ATOM   3824  NZ  LYS X 235     161.830 122.313 204.124  1.00  0.00           N
ATOM   3825  HZ1 LYS X 235     162.100 121.664 203.399  1.00  0.00           H
ATOM   3826  HZ2 LYS X 235     162.582 122.877 204.493  1.00  0.00           H
ATOM   3827  HZ3 LYS X 235     161.305 123.028 203.641  1.00  0.00           H
ATOM   3828  C   LYS X 235     156.257 122.386 206.934  1.00  0.00           C
ATOM   3829  O   LYS X 235     157.047 122.942 207.716  1.00  0.00           O
ATOM   3830  N   ASN X 236     154.966 122.547 206.994  1.00  0.00           N
ATOM   3831  H   ASN X 236     154.386 121.943 206.429  1.00  0.00           H
ATOM   3832  CA  ASN X 236     154.259 123.378 207.929  1.00  0.00           C
ATOM   3833  HA  ASN X 236     154.883 124.266 208.028  1.00  0.00           H
ATOM   3834  CB  ASN X 236     152.974 123.896 207.323  1.00  0.00           C
ATOM   3835  HB2 ASN X 236     152.297 123.113 206.979  1.00  0.00           H
ATOM   3836  HB3 ASN X 236     152.419 124.317 208.161  1.00  0.00           H
ATOM   3837  CG  ASN X 236     152.960 124.875 206.101  1.00  0.00           C
ATOM   3838  OD1 ASN X 236     153.882 125.678 205.847  1.00  0.00           O
ATOM   3839  ND2 ASN X 236     151.860 124.837 205.352  1.00  0.00           N
ATOM   3840 HD21 ASN X 236     151.026 124.288 205.506  1.00  0.00           H
ATOM   3841 HD22 ASN X 236     151.921 125.488 204.582  1.00  0.00           H
ATOM   3842  C   ASN X 236     154.096 122.804 209.308  1.00  0.00           C
ATOM   3843  O   ASN X 236     154.459 123.381 210.323  1.00  0.00           O
ATOM   3844  N   LEU X 237     153.653 121.529 209.361  1.00  0.00           N
ATOM   3845  H   LEU X 237     153.318 121.164 208.481  1.00  0.00           H
ATOM   3846  CA  LEU X 237     153.862 120.662 210.545  1.00  0.00           C
ATOM   3847  HA  LEU X 237     153.215 121.081 211.315  1.00  0.00           H
ATOM   3848  CB  LEU X 237     153.434 119.194 210.180  1.00  0.00           C
ATOM   3849  HB2 LEU X 237     154.064 118.957 209.323  1.00  0.00           H
ATOM   3850  HB3 LEU X 237     153.827 118.518 210.940  1.00  0.00           H
ATOM   3851  CG  LEU X 237     152.015 118.788 209.819  1.00  0.00           C
ATOM   3852  HG  LEU X 237     151.773 119.244 208.859  1.00  0.00           H
ATOM   3853  CD1 LEU X 237     151.798 117.307 209.725  1.00  0.00           C
ATOM   3854 HD11 LEU X 237     152.533 116.879 209.044  1.00  0.00           H
ATOM   3855 HD12 LEU X 237     150.811 117.121 209.302  1.00  0.00           H
ATOM   3856 HD13 LEU X 237     151.895 117.018 210.772  1.00  0.00           H
ATOM   3857  CD2 LEU X 237     150.965 119.412 210.741  1.00  0.00           C
ATOM   3858 HD21 LEU X 237     150.788 119.037 211.749  1.00  0.00           H
ATOM   3859 HD22 LEU X 237     151.030 120.493 210.617  1.00  0.00           H
ATOM   3860 HD23 LEU X 237     150.039 119.145 210.232  1.00  0.00           H
ATOM   3861  C   LEU X 237     155.349 120.515 211.055  1.00  0.00           C
ATOM   3862  O   LEU X 237     155.545 120.578 212.295  1.00  0.00           O
ATOM   3863  N   ALA X 238     156.355 120.518 210.162  1.00  0.00           N
ATOM   3864  H   ALA X 238     155.999 120.227 209.263  1.00  0.00           H
ATOM   3865  CA  ALA X 238     157.816 120.548 210.423  1.00  0.00           C
ATOM   3866  HA  ALA X 238     158.107 119.782 211.143  1.00  0.00           H
ATOM   3867  CB  ALA X 238     158.738 120.238 209.167  1.00  0.00           C
ATOM   3868  HB1 ALA X 238     159.765 120.419 209.482  1.00  0.00           H
ATOM   3869  HB2 ALA X 238     158.580 120.862 208.287  1.00  0.00           H
ATOM   3870  HB3 ALA X 238     158.567 119.222 208.811  1.00  0.00           H
ATOM   3871  C   ALA X 238     158.251 121.872 211.071  1.00  0.00           C
ATOM   3872  O   ALA X 238     159.056 121.936 211.994  1.00  0.00           O
ATOM   3873  N   PHE X 239     157.605 122.956 210.629  1.00  0.00           N
ATOM   3874  H   PHE X 239     157.030 122.813 209.811  1.00  0.00           H
ATOM   3875  CA  PHE X 239     157.774 124.317 211.199  1.00  0.00           C
ATOM   3876  HA  PHE X 239     158.804 124.671 211.190  1.00  0.00           H
ATOM   3877  CB  PHE X 239     157.274 125.329 210.124  1.00  0.00           C
ATOM   3878  HB2 PHE X 239     157.850 125.217 209.205  1.00  0.00           H
ATOM   3879  HB3 PHE X 239     156.293 125.098 209.709  1.00  0.00           H
ATOM   3880  CG  PHE X 239     157.315 126.766 210.700  1.00  0.00           C
ATOM   3881  CD1 PHE X 239     158.520 127.484 210.668  1.00  0.00           C
ATOM   3882  HD1 PHE X 239     159.318 127.021 210.107  1.00  0.00           H
ATOM   3883  CE1 PHE X 239     158.615 128.640 211.454  1.00  0.00           C
ATOM   3884  HE1 PHE X 239     159.544 129.174 211.592  1.00  0.00           H
ATOM   3885  CZ  PHE X 239     157.476 129.137 212.126  1.00  0.00           C
ATOM   3886  HZ  PHE X 239     157.556 130.080 212.646  1.00  0.00           H
ATOM   3887  CE2 PHE X 239     156.254 128.410 212.175  1.00  0.00           C
ATOM   3888  HE2 PHE X 239     155.364 128.813 212.636  1.00  0.00           H
ATOM   3889  CD2 PHE X 239     156.214 127.230 211.457  1.00  0.00           C
ATOM   3890  HD2 PHE X 239     155.262 126.719 211.457  1.00  0.00           H
ATOM   3891  C   PHE X 239     157.173 124.444 212.648  1.00  0.00           C
ATOM   3892  O   PHE X 239     157.783 124.920 213.597  1.00  0.00           O
ATOM   3893  N   MET X 240     155.983 123.989 212.748  1.00  0.00           N
ATOM   3894  H   MET X 240     155.533 123.736 211.880  1.00  0.00           H
ATOM   3895  CA  MET X 240     155.352 123.772 214.058  1.00  0.00           C
ATOM   3896  HA  MET X 240     155.285 124.758 214.519  1.00  0.00           H
ATOM   3897  CB  MET X 240     153.994 123.272 213.876  1.00  0.00           C
ATOM   3898  HB2 MET X 240     153.931 122.397 213.228  1.00  0.00           H
ATOM   3899  HB3 MET X 240     153.662 122.925 214.854  1.00  0.00           H
ATOM   3900  CG  MET X 240     153.123 124.451 213.414  1.00  0.00           C
ATOM   3901  HG2 MET X 240     153.104 125.204 214.202  1.00  0.00           H
ATOM   3902  HG3 MET X 240     153.615 124.924 212.564  1.00  0.00           H
ATOM   3903  SD  MET X 240     151.339 124.054 213.121  1.00  0.00           S
ATOM   3904  CE  MET X 240     151.053 123.259 214.759  1.00  0.00           C
ATOM   3905  HE1 MET X 240     149.985 123.258 214.974  1.00  0.00           H
ATOM   3906  HE2 MET X 240     151.414 122.232 214.707  1.00  0.00           H
ATOM   3907  HE3 MET X 240     151.505 123.801 215.590  1.00  0.00           H
ATOM   3908  C   MET X 240     156.125 122.923 215.014  1.00  0.00           C
ATOM   3909  O   MET X 240     156.302 123.218 216.150  1.00  0.00           O
ATOM   3910  N   GLU X 241     156.711 121.829 214.471  1.00  0.00           N
ATOM   3911  H   GLU X 241     156.419 121.504 213.560  1.00  0.00           H
ATOM   3912  CA  GLU X 241     157.540 120.822 215.116  1.00  0.00           C
ATOM   3913  HA  GLU X 241     157.011 120.536 216.025  1.00  0.00           H
ATOM   3914  CB  GLU X 241     157.730 119.547 214.345  1.00  0.00           C
ATOM   3915  HB2 GLU X 241     156.814 119.172 213.889  1.00  0.00           H
ATOM   3916  HB3 GLU X 241     158.226 119.820 213.414  1.00  0.00           H
ATOM   3917  CG  GLU X 241     158.552 118.382 215.004  1.00  0.00           C
ATOM   3918  HG2 GLU X 241     159.418 118.794 215.522  1.00  0.00           H
ATOM   3919  HG3 GLU X 241     157.916 117.894 215.742  1.00  0.00           H
ATOM   3920  CD  GLU X 241     159.063 117.427 213.903  1.00  0.00           C
ATOM   3921  OE1 GLU X 241     158.420 116.442 213.496  1.00  0.00           O
ATOM   3922  OE2 GLU X 241     160.147 117.581 213.348  1.00  0.00           O
ATOM   3923  C   GLU X 241     158.854 121.502 215.644  1.00  0.00           C
ATOM   3924  O   GLU X 241     159.295 121.149 216.703  1.00  0.00           O
ATOM   3925  N   SER X 242     159.454 122.360 214.871  1.00  0.00           N
ATOM   3926  H   SER X 242     159.024 122.531 213.974  1.00  0.00           H
ATOM   3927  CA  SER X 242     160.604 123.124 215.271  1.00  0.00           C
ATOM   3928  HA  SER X 242     161.439 122.433 215.388  1.00  0.00           H
ATOM   3929  CB  SER X 242     161.060 124.114 214.237  1.00  0.00           C
ATOM   3930  HB2 SER X 242     161.178 123.527 213.326  1.00  0.00           H
ATOM   3931  HB3 SER X 242     160.351 124.941 214.204  1.00  0.00           H
ATOM   3932  OG  SER X 242     162.333 124.668 214.536  1.00  0.00           O
ATOM   3933  HG  SER X 242     162.998 124.007 214.331  1.00  0.00           H
ATOM   3934  C   SER X 242     160.416 123.865 216.651  1.00  0.00           C
ATOM   3935  O   SER X 242     161.376 123.972 217.418  1.00  0.00           O
ATOM   3936  N   ASP X 243     159.252 124.416 216.949  1.00  0.00           N
ATOM   3937  H   ASP X 243     158.450 124.367 216.336  1.00  0.00           H
ATOM   3938  CA  ASP X 243     158.845 125.056 218.212  1.00  0.00           C
ATOM   3939  HA  ASP X 243     159.646 125.694 218.584  1.00  0.00           H
ATOM   3940  CB  ASP X 243     157.633 125.914 217.849  1.00  0.00           C
ATOM   3941  HB2 ASP X 243     157.967 126.654 217.121  1.00  0.00           H
ATOM   3942  HB3 ASP X 243     156.909 125.207 217.444  1.00  0.00           H
ATOM   3943  CG  ASP X 243     157.129 126.870 218.939  1.00  0.00           C
ATOM   3944  OD1 ASP X 243     155.924 127.246 218.825  1.00  0.00           O
ATOM   3945  OD2 ASP X 243     157.793 127.457 219.845  1.00  0.00           O
ATOM   3946  C   ASP X 243     158.345 124.014 219.310  1.00  0.00           C
ATOM   3947  O   ASP X 243     158.736 124.039 220.483  1.00  0.00           O
ATOM   3948  N   ILE X 244     157.539 123.012 218.876  1.00  0.00           N
ATOM   3949  H   ILE X 244     157.301 122.979 217.895  1.00  0.00           H
ATOM   3950  CA  ILE X 244     157.242 121.892 219.724  1.00  0.00           C
ATOM   3951  HA  ILE X 244     156.712 122.392 220.535  1.00  0.00           H
ATOM   3952  CB  ILE X 244     156.173 121.022 219.052  1.00  0.00           C
ATOM   3953  HB  ILE X 244     156.644 120.672 218.133  1.00  0.00           H
ATOM   3954  CG2 ILE X 244     155.869 119.787 219.962  1.00  0.00           C
ATOM   3955 HG21 ILE X 244     155.129 119.071 219.604  1.00  0.00           H
ATOM   3956 HG22 ILE X 244     155.476 120.076 220.937  1.00  0.00           H
ATOM   3957 HG23 ILE X 244     156.790 119.218 220.087  1.00  0.00           H
ATOM   3958  CG1 ILE X 244     154.774 121.716 218.782  1.00  0.00           C
ATOM   3959 HG12 ILE X 244     154.479 122.182 219.722  1.00  0.00           H
ATOM   3960 HG13 ILE X 244     155.021 122.504 218.071  1.00  0.00           H
ATOM   3961  CD1 ILE X 244     153.634 120.906 218.128  1.00  0.00           C
ATOM   3962 HD11 ILE X 244     153.247 120.230 218.890  1.00  0.00           H
ATOM   3963 HD12 ILE X 244     154.135 120.403 217.301  1.00  0.00           H
ATOM   3964 HD13 ILE X 244     152.823 121.472 217.669  1.00  0.00           H
ATOM   3965  C   ILE X 244     158.453 121.119 220.337  1.00  0.00           C
ATOM   3966  O   ILE X 244     158.456 120.692 221.516  1.00  0.00           O
ATOM   3967  N   LEU X 245     159.504 120.836 219.532  1.00  0.00           N
ATOM   3968  H   LEU X 245     159.472 121.044 218.544  1.00  0.00           H
ATOM   3969  CA  LEU X 245     160.650 120.151 220.102  1.00  0.00           C
ATOM   3970  HA  LEU X 245     160.281 119.212 220.514  1.00  0.00           H
ATOM   3971  CB  LEU X 245     161.648 119.915 218.875  1.00  0.00           C
ATOM   3972  HB2 LEU X 245     161.855 120.888 218.429  1.00  0.00           H
ATOM   3973  HB3 LEU X 245     162.613 119.567 219.246  1.00  0.00           H
ATOM   3974  CG  LEU X 245     161.263 118.964 217.712  1.00  0.00           C
ATOM   3975  HG  LEU X 245     160.251 119.177 217.368  1.00  0.00           H
ATOM   3976  CD1 LEU X 245     162.320 119.019 216.661  1.00  0.00           C
ATOM   3977 HD11 LEU X 245     163.323 118.872 217.062  1.00  0.00           H
ATOM   3978 HD12 LEU X 245     162.399 120.057 216.336  1.00  0.00           H
ATOM   3979 HD13 LEU X 245     162.001 118.370 215.846  1.00  0.00           H
ATOM   3980  CD2 LEU X 245     161.312 117.528 218.270  1.00  0.00           C
ATOM   3981 HD21 LEU X 245     162.319 117.202 218.529  1.00  0.00           H
ATOM   3982 HD22 LEU X 245     160.619 117.512 219.112  1.00  0.00           H
ATOM   3983 HD23 LEU X 245     160.809 116.869 217.563  1.00  0.00           H
ATOM   3984  C   LEU X 245     161.361 120.860 221.224  1.00  0.00           C
ATOM   3985  O   LEU X 245     161.766 120.222 222.154  1.00  0.00           O
ATOM   3986  N   GLU X 246     161.228 122.196 221.214  1.00  0.00           N
ATOM   3987  H   GLU X 246     160.522 122.579 220.601  1.00  0.00           H
ATOM   3988  CA  GLU X 246     161.884 123.099 222.209  1.00  0.00           C
ATOM   3989  HA  GLU X 246     162.853 122.682 222.483  1.00  0.00           H
ATOM   3990  CB  GLU X 246     162.028 124.492 221.483  1.00  0.00           C
ATOM   3991  HB2 GLU X 246     161.110 124.758 220.958  1.00  0.00           H
ATOM   3992  HB3 GLU X 246     162.355 125.161 222.278  1.00  0.00           H
ATOM   3993  CG  GLU X 246     163.294 124.544 220.558  1.00  0.00           C
ATOM   3994  HG2 GLU X 246     163.235 123.698 219.873  1.00  0.00           H
ATOM   3995  HG3 GLU X 246     163.336 125.496 220.028  1.00  0.00           H
ATOM   3996  CD  GLU X 246     164.626 124.424 221.272  1.00  0.00           C
ATOM   3997  OE1 GLU X 246     165.633 124.224 220.622  1.00  0.00           O
ATOM   3998  OE2 GLU X 246     164.695 124.539 222.519  1.00  0.00           O
ATOM   3999  C   GLU X 246     161.051 123.236 223.446  1.00  0.00           C
ATOM   4000  O   GLU X 246     161.565 123.319 224.548  1.00  0.00           O
ATOM   4001  N   LYS X 247     159.671 123.199 223.193  1.00  0.00           N
ATOM   4002  H   LYS X 247     159.419 123.366 222.229  1.00  0.00           H
ATOM   4003  CA  LYS X 247     158.675 123.207 224.275  1.00  0.00           C
ATOM   4004  HA  LYS X 247     158.913 124.093 224.864  1.00  0.00           H
ATOM   4005  CB  LYS X 247     157.320 123.426 223.606  1.00  0.00           C
ATOM   4006  HB2 LYS X 247     157.269 122.790 222.722  1.00  0.00           H
ATOM   4007  HB3 LYS X 247     156.517 123.153 224.292  1.00  0.00           H
ATOM   4008  CG  LYS X 247     157.110 124.933 223.303  1.00  0.00           C
ATOM   4009  HG2 LYS X 247     157.082 125.471 224.250  1.00  0.00           H
ATOM   4010  HG3 LYS X 247     157.986 125.258 222.742  1.00  0.00           H
ATOM   4011  CD  LYS X 247     155.905 125.428 222.371  1.00  0.00           C
ATOM   4012  HD2 LYS X 247     155.968 124.985 221.376  1.00  0.00           H
ATOM   4013  HD3 LYS X 247     154.966 125.218 222.882  1.00  0.00           H
ATOM   4014  CE  LYS X 247     156.037 126.969 222.250  1.00  0.00           C
ATOM   4015  HE2 LYS X 247     155.901 127.487 223.199  1.00  0.00           H
ATOM   4016  HE3 LYS X 247     157.004 127.237 221.825  1.00  0.00           H
ATOM   4017  NZ  LYS X 247     155.043 127.478 221.294  1.00  0.00           N
ATOM   4018  HZ1 LYS X 247     154.916 128.447 221.551  1.00  0.00           H
ATOM   4019  HZ2 LYS X 247     154.123 127.090 221.447  1.00  0.00           H
ATOM   4020  HZ3 LYS X 247     155.279 127.464 220.312  1.00  0.00           H
ATOM   4021  C   LYS X 247     158.606 121.894 225.055  1.00  0.00           C
ATOM   4022  O   LYS X 247     158.537 122.008 226.274  1.00  0.00           O
ATOM   4023  N   VAL X 248     158.855 120.771 224.381  1.00  0.00           N
ATOM   4024  H   VAL X 248     158.741 120.759 223.378  1.00  0.00           H
ATOM   4025  CA  VAL X 248     159.013 119.492 225.018  1.00  0.00           C
ATOM   4026  HA  VAL X 248     158.327 119.351 225.853  1.00  0.00           H
ATOM   4027  CB  VAL X 248     158.838 118.305 224.019  1.00  0.00           C
ATOM   4028  HB  VAL X 248     159.465 118.509 223.151  1.00  0.00           H
ATOM   4029  CG1 VAL X 248     159.239 116.869 224.450  1.00  0.00           C
ATOM   4030 HG11 VAL X 248     160.290 116.901 224.738  1.00  0.00           H
ATOM   4031 HG12 VAL X 248     158.658 116.508 225.298  1.00  0.00           H
ATOM   4032 HG13 VAL X 248     159.074 116.101 223.694  1.00  0.00           H
ATOM   4033  CG2 VAL X 248     157.355 118.214 223.608  1.00  0.00           C
ATOM   4034 HG21 VAL X 248     157.015 119.020 222.957  1.00  0.00           H
ATOM   4035 HG22 VAL X 248     156.756 118.167 224.517  1.00  0.00           H
ATOM   4036 HG23 VAL X 248     157.169 117.360 222.957  1.00  0.00           H
ATOM   4037  C   VAL X 248     160.274 119.305 225.744  1.00  0.00           C
ATOM   4038  O   VAL X 248     160.207 118.863 226.856  1.00  0.00           O
ATOM   4039  N   LYS X 249     161.363 119.752 225.152  1.00  0.00           N
ATOM   4040  H   LYS X 249     161.292 119.715 224.145  1.00  0.00           H
ATOM   4041  CA  LYS X 249     162.743 119.732 225.657  1.00  0.00           C
ATOM   4042  HA  LYS X 249     162.963 118.719 225.997  1.00  0.00           H
ATOM   4043  CB  LYS X 249     163.755 120.316 224.654  1.00  0.00           C
ATOM   4044  HB2 LYS X 249     163.665 119.636 223.807  1.00  0.00           H
ATOM   4045  HB3 LYS X 249     163.494 121.299 224.262  1.00  0.00           H
ATOM   4046  CG  LYS X 249     165.224 120.288 225.096  1.00  0.00           C
ATOM   4047  HG2 LYS X 249     165.393 121.082 225.824  1.00  0.00           H
ATOM   4048  HG3 LYS X 249     165.493 119.305 225.483  1.00  0.00           H
ATOM   4049  CD  LYS X 249     166.187 120.528 223.936  1.00  0.00           C
ATOM   4050  HD2 LYS X 249     167.186 120.411 224.357  1.00  0.00           H
ATOM   4051  HD3 LYS X 249     165.987 119.840 223.114  1.00  0.00           H
ATOM   4052  CE  LYS X 249     165.943 121.938 223.339  1.00  0.00           C
ATOM   4053  HE2 LYS X 249     164.893 122.064 223.077  1.00  0.00           H
ATOM   4054  HE3 LYS X 249     166.196 122.680 224.096  1.00  0.00           H
ATOM   4055  NZ  LYS X 249     166.752 122.180 222.152  1.00  0.00           N
ATOM   4056  HZ1 LYS X 249     166.779 121.401 221.510  1.00  0.00           H
ATOM   4057  HZ2 LYS X 249     167.672 122.509 222.409  1.00  0.00           H
ATOM   4058  HZ3 LYS X 249     166.286 122.871 221.582  1.00  0.00           H
ATOM   4059  C   LYS X 249     162.796 120.456 226.981  1.00  0.00           C
ATOM   4060  O   LYS X 249     163.449 119.881 227.951  1.00  0.00           O
ATOM   4061  N   GLU X 250     162.034 121.539 227.143  1.00  0.00           N
ATOM   4062  H   GLU X 250     161.695 121.971 226.295  1.00  0.00           H
ATOM   4063  CA  GLU X 250     161.991 122.326 228.343  1.00  0.00           C
ATOM   4064  HA  GLU X 250     163.048 122.407 228.595  1.00  0.00           H
ATOM   4065  CB  GLU X 250     161.643 123.770 228.006  1.00  0.00           C
ATOM   4066  HB2 GLU X 250     162.308 124.216 227.265  1.00  0.00           H
ATOM   4067  HB3 GLU X 250     160.636 123.762 227.589  1.00  0.00           H
ATOM   4068  CG  GLU X 250     161.653 124.725 229.219  1.00  0.00           C
ATOM   4069  HG2 GLU X 250     160.943 125.540 229.077  1.00  0.00           H
ATOM   4070  HG3 GLU X 250     161.253 124.320 230.148  1.00  0.00           H
ATOM   4071  CD  GLU X 250     163.018 125.421 229.417  1.00  0.00           C
ATOM   4072  OE1 GLU X 250     163.012 126.656 229.701  1.00  0.00           O
ATOM   4073  OE2 GLU X 250     164.048 124.814 229.490  1.00  0.00           O
ATOM   4074  C   GLU X 250     161.167 121.731 229.500  1.00  0.00           C
ATOM   4075  O   GLU X 250     161.674 121.684 230.618  1.00  0.00           O
ATOM   4076  N   HIE X 251     159.957 121.257 229.177  1.00  0.00           N
ATOM   4077  H   HIE X 251     159.739 121.143 228.197  1.00  0.00           H
ATOM   4078  CA  HIE X 251     159.101 120.576 230.187  1.00  0.00           C
ATOM   4079  HA  HIE X 251     159.148 121.260 231.034  1.00  0.00           H
ATOM   4080  CB  HIE X 251     157.693 120.311 229.617  1.00  0.00           C
ATOM   4081  HB2 HIE X 251     157.965 119.927 228.634  1.00  0.00           H
ATOM   4082  HB3 HIE X 251     157.107 119.557 230.143  1.00  0.00           H
ATOM   4083  CG  HIE X 251     156.876 121.507 229.305  1.00  0.00           C
ATOM   4084  ND1 HIE X 251     156.727 122.666 230.026  1.00  0.00           N
ATOM   4085  CE1 HIE X 251     155.741 123.385 229.391  1.00  0.00           C
ATOM   4086  HE1 HIE X 251     155.396 124.345 229.744  1.00  0.00           H
ATOM   4087  NE2 HIE X 251     155.307 122.809 228.311  1.00  0.00           N
ATOM   4088  HE2 HIE X 251     154.521 123.087 227.741  1.00  0.00           H
ATOM   4089  CD2 HIE X 251     155.994 121.606 228.286  1.00  0.00           C
ATOM   4090  HD2 HIE X 251     155.673 120.782 227.666  1.00  0.00           H
ATOM   4091  C   HIE X 251     159.635 119.186 230.621  1.00  0.00           C
ATOM   4092  O   HIE X 251     159.350 118.787 231.782  1.00  0.00           O
ATOM   4093  N   GLN X 252     160.402 118.498 229.827  1.00  0.00           N
ATOM   4094  H   GLN X 252     160.626 118.757 228.877  1.00  0.00           H
ATOM   4095  CA  GLN X 252     160.931 117.171 230.218  1.00  0.00           C
ATOM   4096  HA  GLN X 252     160.100 116.495 230.421  1.00  0.00           H
ATOM   4097  CB  GLN X 252     161.734 116.547 229.133  1.00  0.00           C
ATOM   4098  HB2 GLN X 252     162.351 117.297 228.639  1.00  0.00           H
ATOM   4099  HB3 GLN X 252     162.426 115.848 229.603  1.00  0.00           H
ATOM   4100  CG  GLN X 252     160.857 115.815 228.079  1.00  0.00           C
ATOM   4101  HG2 GLN X 252     160.058 116.469 227.731  1.00  0.00           H
ATOM   4102  HG3 GLN X 252     161.576 115.564 227.298  1.00  0.00           H
ATOM   4103  CD  GLN X 252     160.282 114.445 228.554  1.00  0.00           C
ATOM   4104  OE1 GLN X 252     160.442 113.893 229.599  1.00  0.00           O
ATOM   4105  NE2 GLN X 252     159.385 113.847 227.820  1.00  0.00           N
ATOM   4106 HE21 GLN X 252     159.120 112.905 228.073  1.00  0.00           H
ATOM   4107 HE22 GLN X 252     159.195 114.098 226.860  1.00  0.00           H
ATOM   4108  C   GLN X 252     161.623 117.189 231.623  1.00  0.00           C
ATOM   4109  O   GLN X 252     161.763 116.101 232.213  1.00  0.00           O
ATOM   4110  N   GLU X 253     162.264 118.325 231.955  1.00  0.00           N
ATOM   4111  H   GLU X 253     162.070 119.121 231.366  1.00  0.00           H
ATOM   4112  CA  GLU X 253     163.317 118.406 232.948  1.00  0.00           C
ATOM   4113  HA  GLU X 253     163.986 117.547 232.892  1.00  0.00           H
ATOM   4114  CB  GLU X 253     164.081 119.661 232.649  1.00  0.00           C
ATOM   4115  HB2 GLU X 253     163.438 120.514 232.438  1.00  0.00           H
ATOM   4116  HB3 GLU X 253     164.732 119.923 233.484  1.00  0.00           H
ATOM   4117  CG  GLU X 253     165.039 119.528 231.477  1.00  0.00           C
ATOM   4118  HG2 GLU X 253     164.357 119.306 230.656  1.00  0.00           H
ATOM   4119  HG3 GLU X 253     165.374 120.523 231.186  1.00  0.00           H
ATOM   4120  CD  GLU X 253     166.150 118.537 231.673  1.00  0.00           C
ATOM   4121  OE1 GLU X 253     166.855 118.592 232.729  1.00  0.00           O
ATOM   4122  OE2 GLU X 253     166.421 117.694 230.764  1.00  0.00           O
ATOM   4123  C   GLU X 253     162.741 118.521 234.360  1.00  0.00           C
ATOM   4124  O   GLU X 253     163.523 118.247 235.279  1.00  0.00           O
ATOM   4125  N   SER X 254     161.447 118.804 234.634  1.00  0.00           N
ATOM   4126  H   SER X 254     160.871 118.982 233.825  1.00  0.00           H
ATOM   4127  CA  SER X 254     160.840 118.793 236.006  1.00  0.00           C
ATOM   4128  HA  SER X 254     161.317 117.968 236.535  1.00  0.00           H
ATOM   4129  CB  SER X 254     161.049 120.065 236.878  1.00  0.00           C
ATOM   4130  HB2 SER X 254     162.109 120.262 237.036  1.00  0.00           H
ATOM   4131  HB3 SER X 254     160.689 120.946 236.347  1.00  0.00           H
ATOM   4132  OG  SER X 254     160.343 119.925 238.073  1.00  0.00           O
ATOM   4133  HG  SER X 254     160.055 120.745 238.482  1.00  0.00           H
ATOM   4134  C   SER X 254     159.354 118.419 235.820  1.00  0.00           C
ATOM   4135  O   SER X 254     158.737 118.950 234.848  1.00  0.00           O
ATOM   4136  N   MET X 255     158.713 117.561 236.708  1.00  0.00           N
ATOM   4137  H   MET X 255     159.241 117.046 237.399  1.00  0.00           H
ATOM   4138  CA  MET X 255     157.280 117.293 236.498  1.00  0.00           C
ATOM   4139  HA  MET X 255     156.725 117.901 235.784  1.00  0.00           H
ATOM   4140  CB  MET X 255     157.058 115.782 236.008  1.00  0.00           C
ATOM   4141  HB2 MET X 255     157.544 115.586 235.052  1.00  0.00           H
ATOM   4142  HB3 MET X 255     157.633 115.088 236.622  1.00  0.00           H
ATOM   4143  CG  MET X 255     155.644 115.097 235.954  1.00  0.00           C
ATOM   4144  HG2 MET X 255     155.348 114.822 236.966  1.00  0.00           H
ATOM   4145  HG3 MET X 255     154.911 115.746 235.474  1.00  0.00           H
ATOM   4146  SD  MET X 255     155.672 113.445 235.225  1.00  0.00           S
ATOM   4147  CE  MET X 255     156.340 113.780 233.598  1.00  0.00           C
ATOM   4148  HE1 MET X 255     156.327 112.847 233.035  1.00  0.00           H
ATOM   4149  HE2 MET X 255     155.915 114.601 233.021  1.00  0.00           H
ATOM   4150  HE3 MET X 255     157.405 113.970 233.730  1.00  0.00           H
ATOM   4151  C   MET X 255     156.524 117.447 237.786  1.00  0.00           C
ATOM   4152  O   MET X 255     156.785 116.720 238.783  1.00  0.00           O
ATOM   4153  N   ASP X 256     155.357 118.095 237.715  1.00  0.00           N
ATOM   4154  H   ASP X 256     155.231 118.743 236.951  1.00  0.00           H
ATOM   4155  CA  ASP X 256     154.329 118.281 238.811  1.00  0.00           C
ATOM   4156  HA  ASP X 256     154.680 117.628 239.610  1.00  0.00           H
ATOM   4157  CB  ASP X 256     154.551 119.648 239.504  1.00  0.00           C
ATOM   4158  HB2 ASP X 256     155.596 119.948 239.583  1.00  0.00           H
ATOM   4159  HB3 ASP X 256     154.198 120.349 238.747  1.00  0.00           H
ATOM   4160  CG  ASP X 256     153.798 119.958 240.822  1.00  0.00           C
ATOM   4161  OD1 ASP X 256     154.188 120.909 241.561  1.00  0.00           O
ATOM   4162  OD2 ASP X 256     152.788 119.353 241.125  1.00  0.00           O
ATOM   4163  C   ASP X 256     152.877 117.896 238.359  1.00  0.00           C
ATOM   4164  O   ASP X 256     152.208 118.791 237.835  1.00  0.00           O
ATOM   4165  N   ILE X 257     152.515 116.657 238.506  1.00  0.00           N
ATOM   4166  H   ILE X 257     153.180 116.000 238.890  1.00  0.00           H
ATOM   4167  CA  ILE X 257     151.312 116.098 237.907  1.00  0.00           C
ATOM   4168  HA  ILE X 257     151.373 116.203 236.824  1.00  0.00           H
ATOM   4169  CB  ILE X 257     151.186 114.605 238.241  1.00  0.00           C
ATOM   4170  HB  ILE X 257     151.480 114.628 239.290  1.00  0.00           H
ATOM   4171  CG2 ILE X 257     149.781 113.904 238.173  1.00  0.00           C
ATOM   4172 HG21 ILE X 257     149.028 114.315 238.846  1.00  0.00           H
ATOM   4173 HG22 ILE X 257     149.827 112.826 238.325  1.00  0.00           H
ATOM   4174 HG23 ILE X 257     149.315 114.065 237.201  1.00  0.00           H
ATOM   4175  CG1 ILE X 257     152.199 113.936 237.320  1.00  0.00           C
ATOM   4176 HG12 ILE X 257     151.737 113.799 236.342  1.00  0.00           H
ATOM   4177 HG13 ILE X 257     153.028 114.620 237.138  1.00  0.00           H
ATOM   4178  CD1 ILE X 257     152.718 112.665 237.923  1.00  0.00           C
ATOM   4179 HD11 ILE X 257     151.888 112.359 238.560  1.00  0.00           H
ATOM   4180 HD12 ILE X 257     153.578 112.776 238.584  1.00  0.00           H
ATOM   4181 HD13 ILE X 257     152.863 111.844 237.220  1.00  0.00           H
ATOM   4182  C   ILE X 257     150.014 116.917 238.256  1.00  0.00           C
ATOM   4183  O   ILE X 257     149.129 117.137 237.443  1.00  0.00           O
ATOM   4184  N   ASN X 258     149.915 117.402 239.530  1.00  0.00           N
ATOM   4185  H   ASN X 258     150.641 117.199 240.202  1.00  0.00           H
ATOM   4186  CA  ASN X 258     148.861 118.266 240.030  1.00  0.00           C
ATOM   4187  HA  ASN X 258     147.895 117.823 239.787  1.00  0.00           H
ATOM   4188  CB  ASN X 258     149.060 118.242 241.534  1.00  0.00           C
ATOM   4189  HB2 ASN X 258     150.110 118.456 241.730  1.00  0.00           H
ATOM   4190  HB3 ASN X 258     148.435 119.025 241.964  1.00  0.00           H
ATOM   4191  CG  ASN X 258     148.558 116.850 242.082  1.00  0.00           C
ATOM   4192  OD1 ASN X 258     147.427 116.428 241.916  1.00  0.00           O
ATOM   4193  ND2 ASN X 258     149.467 116.032 242.549  1.00  0.00           N
ATOM   4194 HD21 ASN X 258     150.444 116.269 242.460  1.00  0.00           H
ATOM   4195 HD22 ASN X 258     149.280 115.094 242.873  1.00  0.00           H
ATOM   4196  C   ASN X 258     148.829 119.709 239.438  1.00  0.00           C
ATOM   4197  O   ASN X 258     147.885 120.496 239.558  1.00  0.00           O
ATOM   4198  N   ASN X 259     149.870 120.095 238.696  1.00  0.00           N
ATOM   4199  H   ASN X 259     150.630 119.435 238.610  1.00  0.00           H
ATOM   4200  CA  ASN X 259     150.214 121.501 238.299  1.00  0.00           C
ATOM   4201  HA  ASN X 259     149.264 122.025 238.196  1.00  0.00           H
ATOM   4202  CB  ASN X 259     151.009 122.013 239.464  1.00  0.00           C
ATOM   4203  HB2 ASN X 259     151.991 121.553 239.568  1.00  0.00           H
ATOM   4204  HB3 ASN X 259     151.231 123.050 239.211  1.00  0.00           H
ATOM   4205  CG  ASN X 259     150.276 122.111 240.759  1.00  0.00           C
ATOM   4206  OD1 ASN X 259     149.341 122.848 240.976  1.00  0.00           O
ATOM   4207  ND2 ASN X 259     150.756 121.440 241.761  1.00  0.00           N
ATOM   4208 HD21 ASN X 259     151.534 120.804 241.654  1.00  0.00           H
ATOM   4209 HD22 ASN X 259     150.389 121.521 242.698  1.00  0.00           H
ATOM   4210  C   ASN X 259     150.874 121.583 236.921  1.00  0.00           C
ATOM   4211  O   ASN X 259     151.970 122.090 236.775  1.00  0.00           O
ATOM   4212  N   PRO X 260     150.107 121.209 235.885  1.00  0.00           N
ATOM   4213  CD  PRO X 260     148.704 120.695 235.893  1.00  0.00           C
ATOM   4214  HD2 PRO X 260     148.080 121.457 236.359  1.00  0.00           H
ATOM   4215  HD3 PRO X 260     148.669 119.700 236.337  1.00  0.00           H
ATOM   4216  CG  PRO X 260     148.189 120.712 234.418  1.00  0.00           C
ATOM   4217  HG2 PRO X 260     147.747 121.651 234.083  1.00  0.00           H
ATOM   4218  HG3 PRO X 260     147.419 119.944 234.336  1.00  0.00           H
ATOM   4219  CB  PRO X 260     149.537 120.483 233.655  1.00  0.00           C
ATOM   4220  HB2 PRO X 260     149.514 120.829 232.621  1.00  0.00           H
ATOM   4221  HB3 PRO X 260     149.735 119.412 233.612  1.00  0.00           H
ATOM   4222  CA  PRO X 260     150.600 121.212 234.476  1.00  0.00           C
ATOM   4223  HA  PRO X 260     151.508 120.613 234.404  1.00  0.00           H
ATOM   4224  C   PRO X 260     150.702 122.660 233.922  1.00  0.00           C
ATOM   4225  O   PRO X 260     149.933 123.487 234.319  1.00  0.00           O
ATOM   4226  N   ARG X 261     151.770 122.915 233.189  1.00  0.00           N
ATOM   4227  H   ARG X 261     152.443 122.211 232.921  1.00  0.00           H
ATOM   4228  CA  ARG X 261     152.119 124.274 232.737  1.00  0.00           C
ATOM   4229  HA  ARG X 261     151.926 124.966 233.557  1.00  0.00           H
ATOM   4230  CB  ARG X 261     153.570 124.275 232.456  1.00  0.00           C
ATOM   4231  HB2 ARG X 261     153.880 123.406 231.877  1.00  0.00           H
ATOM   4232  HB3 ARG X 261     153.777 125.184 231.892  1.00  0.00           H
ATOM   4233  CG  ARG X 261     154.541 124.284 233.634  1.00  0.00           C
ATOM   4234  HG2 ARG X 261     154.576 125.272 234.094  1.00  0.00           H
ATOM   4235  HG3 ARG X 261     154.239 123.619 234.443  1.00  0.00           H
ATOM   4236  CD  ARG X 261     155.894 123.855 233.172  1.00  0.00           C
ATOM   4237  HD2 ARG X 261     156.173 124.243 232.192  1.00  0.00           H
ATOM   4238  HD3 ARG X 261     156.559 124.272 233.929  1.00  0.00           H
ATOM   4239  NE  ARG X 261     155.989 122.348 233.142  1.00  0.00           N
ATOM   4240  HE  ARG X 261     155.160 121.855 232.841  1.00  0.00           H
ATOM   4241  CZ  ARG X 261     157.094 121.597 233.023  1.00  0.00           C
ATOM   4242  NH1 ARG X 261     158.232 122.131 233.347  1.00  0.00           N
ATOM   4243 HH11 ARG X 261     158.289 123.028 233.807  1.00  0.00           H
ATOM   4244 HH12 ARG X 261     159.103 121.623 233.409  1.00  0.00           H
ATOM   4245  NH2 ARG X 261     157.043 120.353 232.761  1.00  0.00           N
ATOM   4246 HH21 ARG X 261     156.181 119.897 232.498  1.00  0.00           H
ATOM   4247 HH22 ARG X 261     157.913 119.859 232.619  1.00  0.00           H
ATOM   4248  C   ARG X 261     151.310 124.766 231.563  1.00  0.00           C
ATOM   4249  O   ARG X 261     150.746 125.882 231.538  1.00  0.00           O
ATOM   4250  N   ASP X 262     151.152 123.939 230.561  1.00  0.00           N
ATOM   4251  H   ASP X 262     151.355 122.951 230.598  1.00  0.00           H
ATOM   4252  CA  ASP X 262     150.351 124.225 229.333  1.00  0.00           C
ATOM   4253  HA  ASP X 262     149.408 124.698 229.607  1.00  0.00           H
ATOM   4254  CB  ASP X 262     151.141 125.200 228.398  1.00  0.00           C
ATOM   4255  HB2 ASP X 262     150.538 125.453 227.527  1.00  0.00           H
ATOM   4256  HB3 ASP X 262     151.335 126.136 228.923  1.00  0.00           H
ATOM   4257  CG  ASP X 262     152.511 124.719 227.923  1.00  0.00           C
ATOM   4258  OD1 ASP X 262     153.589 125.265 228.179  1.00  0.00           O
ATOM   4259  OD2 ASP X 262     152.619 123.601 227.338  1.00  0.00           O
ATOM   4260  C   ASP X 262     150.000 122.885 228.622  1.00  0.00           C
ATOM   4261  O   ASP X 262     150.259 121.792 229.179  1.00  0.00           O
ATOM   4262  N   PHE X 263     149.332 122.939 227.440  1.00  0.00           N
ATOM   4263  H   PHE X 263     149.038 123.817 227.037  1.00  0.00           H
ATOM   4264  CA  PHE X 263     148.755 121.661 226.822  1.00  0.00           C
ATOM   4265  HA  PHE X 263     148.053 121.222 227.530  1.00  0.00           H
ATOM   4266  CB  PHE X 263     148.051 121.998 225.485  1.00  0.00           C
ATOM   4267  HB2 PHE X 263     147.502 122.924 225.660  1.00  0.00           H
ATOM   4268  HB3 PHE X 263     148.865 122.167 224.782  1.00  0.00           H
ATOM   4269  CG  PHE X 263     147.088 121.000 224.757  1.00  0.00           C
ATOM   4270  CD1 PHE X 263     147.577 120.022 223.849  1.00  0.00           C
ATOM   4271  HD1 PHE X 263     148.639 119.877 223.716  1.00  0.00           H
ATOM   4272  CE1 PHE X 263     146.752 119.041 223.302  1.00  0.00           C
ATOM   4273  HE1 PHE X 263     147.151 118.182 222.783  1.00  0.00           H
ATOM   4274  CZ  PHE X 263     145.376 119.264 223.302  1.00  0.00           C
ATOM   4275  HZ  PHE X 263     144.691 118.508 222.948  1.00  0.00           H
ATOM   4276  CE2 PHE X 263     144.788 120.359 224.135  1.00  0.00           C
ATOM   4277  HE2 PHE X 263     143.726 120.533 224.054  1.00  0.00           H
ATOM   4278  CD2 PHE X 263     145.677 121.185 224.868  1.00  0.00           C
ATOM   4279  HD2 PHE X 263     145.260 122.019 225.413  1.00  0.00           H
ATOM   4280  C   PHE X 263     149.845 120.640 226.500  1.00  0.00           C
ATOM   4281  O   PHE X 263     149.582 119.464 226.607  1.00  0.00           O
ATOM   4282  N   ILE X 264     151.045 120.992 226.217  1.00  0.00           N
ATOM   4283  H   ILE X 264     151.054 121.984 226.031  1.00  0.00           H
ATOM   4284  CA  ILE X 264     152.170 120.162 225.906  1.00  0.00           C
ATOM   4285  HA  ILE X 264     151.940 119.407 225.154  1.00  0.00           H
ATOM   4286  CB  ILE X 264     153.381 120.959 225.391  1.00  0.00           C
ATOM   4287  HB  ILE X 264     153.726 121.561 226.232  1.00  0.00           H
ATOM   4288  CG2 ILE X 264     154.673 120.187 224.939  1.00  0.00           C
ATOM   4289 HG21 ILE X 264     154.491 119.685 223.989  1.00  0.00           H
ATOM   4290 HG22 ILE X 264     155.113 119.569 225.722  1.00  0.00           H
ATOM   4291 HG23 ILE X 264     155.449 120.897 224.651  1.00  0.00           H
ATOM   4292  CG1 ILE X 264     152.937 122.017 224.375  1.00  0.00           C
ATOM   4293 HG12 ILE X 264     152.303 122.785 224.818  1.00  0.00           H
ATOM   4294 HG13 ILE X 264     153.829 122.586 224.115  1.00  0.00           H
ATOM   4295  CD1 ILE X 264     152.424 121.451 223.015  1.00  0.00           C
ATOM   4296 HD11 ILE X 264     152.030 122.282 222.430  1.00  0.00           H
ATOM   4297 HD12 ILE X 264     151.521 120.888 223.252  1.00  0.00           H
ATOM   4298 HD13 ILE X 264     153.175 120.787 222.587  1.00  0.00           H
ATOM   4299  C   ILE X 264     152.620 119.432 227.188  1.00  0.00           C
ATOM   4300  O   ILE X 264     152.808 118.221 227.167  1.00  0.00           O
ATOM   4301  N   ASP X 265     152.761 120.053 228.337  1.00  0.00           N
ATOM   4302  H   ASP X 265     152.465 121.019 228.318  1.00  0.00           H
ATOM   4303  CA  ASP X 265     152.961 119.437 229.621  1.00  0.00           C
ATOM   4304  HA  ASP X 265     153.944 118.965 229.590  1.00  0.00           H
ATOM   4305  CB  ASP X 265     152.943 120.518 230.698  1.00  0.00           C
ATOM   4306  HB2 ASP X 265     153.429 121.412 230.306  1.00  0.00           H
ATOM   4307  HB3 ASP X 265     151.957 120.794 231.071  1.00  0.00           H
ATOM   4308  CG  ASP X 265     153.749 120.022 231.895  1.00  0.00           C
ATOM   4309  OD1 ASP X 265     154.614 119.148 231.888  1.00  0.00           O
ATOM   4310  OD2 ASP X 265     153.709 120.735 232.921  1.00  0.00           O
ATOM   4311  C   ASP X 265     151.900 118.380 230.017  1.00  0.00           C
ATOM   4312  O   ASP X 265     152.191 117.299 230.469  1.00  0.00           O
ATOM   4313  N   CYS X 266     150.616 118.731 229.840  1.00  0.00           N
ATOM   4314  H   CYS X 266     150.459 119.631 229.409  1.00  0.00           H
ATOM   4315  CA  CYS X 266     149.470 117.837 229.910  1.00  0.00           C
ATOM   4316  HA  CYS X 266     149.469 117.584 230.971  1.00  0.00           H
ATOM   4317  CB  CYS X 266     148.097 118.508 229.552  1.00  0.00           C
ATOM   4318  HB2 CYS X 266     148.007 118.603 228.470  1.00  0.00           H
ATOM   4319  HB3 CYS X 266     147.312 117.855 229.934  1.00  0.00           H
ATOM   4320  SG  CYS X 266     147.864 120.081 230.298  1.00  0.00           S
ATOM   4321  HG  CYS X 266     148.996 120.543 229.760  1.00  0.00           H
ATOM   4322  C   CYS X 266     149.667 116.551 229.009  1.00  0.00           C
ATOM   4323  O   CYS X 266     149.649 115.458 229.553  1.00  0.00           O
ATOM   4324  N   PHE X 267     150.014 116.741 227.732  1.00  0.00           N
ATOM   4325  H   PHE X 267     149.990 117.694 227.396  1.00  0.00           H
ATOM   4326  CA  PHE X 267     150.473 115.638 226.805  1.00  0.00           C
ATOM   4327  HA  PHE X 267     149.611 115.006 226.589  1.00  0.00           H
ATOM   4328  CB  PHE X 267     150.813 116.227 225.502  1.00  0.00           C
ATOM   4329  HB2 PHE X 267     150.153 117.083 225.361  1.00  0.00           H
ATOM   4330  HB3 PHE X 267     151.857 116.537 225.514  1.00  0.00           H
ATOM   4331  CG  PHE X 267     150.610 115.230 224.430  1.00  0.00           C
ATOM   4332  CD1 PHE X 267     149.342 115.156 223.865  1.00  0.00           C
ATOM   4333  HD1 PHE X 267     148.565 115.745 224.328  1.00  0.00           H
ATOM   4334  CE1 PHE X 267     149.209 114.544 222.631  1.00  0.00           C
ATOM   4335  HE1 PHE X 267     148.221 114.577 222.197  1.00  0.00           H
ATOM   4336  CZ  PHE X 267     150.247 113.713 222.081  1.00  0.00           C
ATOM   4337  HZ  PHE X 267     150.083 113.069 221.229  1.00  0.00           H
ATOM   4338  CE2 PHE X 267     151.457 113.685 222.786  1.00  0.00           C
ATOM   4339  HE2 PHE X 267     152.310 113.102 222.473  1.00  0.00           H
ATOM   4340  CD2 PHE X 267     151.617 114.459 223.962  1.00  0.00           C
ATOM   4341  HD2 PHE X 267     152.533 114.377 224.528  1.00  0.00           H
ATOM   4342  C   PHE X 267     151.603 114.788 227.407  1.00  0.00           C
ATOM   4343  O   PHE X 267     151.425 113.575 227.446  1.00  0.00           O
ATOM   4344  N   LEU X 268     152.677 115.409 227.986  1.00  0.00           N
ATOM   4345  H   LEU X 268     152.824 116.407 227.952  1.00  0.00           H
ATOM   4346  CA  LEU X 268     153.866 114.741 228.536  1.00  0.00           C
ATOM   4347  HA  LEU X 268     154.308 114.041 227.826  1.00  0.00           H
ATOM   4348  CB  LEU X 268     154.885 115.810 228.948  1.00  0.00           C
ATOM   4349  HB2 LEU X 268     154.388 116.778 229.020  1.00  0.00           H
ATOM   4350  HB3 LEU X 268     155.261 115.749 229.969  1.00  0.00           H
ATOM   4351  CG  LEU X 268     156.125 115.926 227.965  1.00  0.00           C
ATOM   4352  HG  LEU X 268     156.591 114.942 227.936  1.00  0.00           H
ATOM   4353  CD1 LEU X 268     155.744 116.424 226.584  1.00  0.00           C
ATOM   4354 HD11 LEU X 268     155.131 117.325 226.584  1.00  0.00           H
ATOM   4355 HD12 LEU X 268     155.242 115.574 226.122  1.00  0.00           H
ATOM   4356 HD13 LEU X 268     156.688 116.517 226.046  1.00  0.00           H
ATOM   4357  CD2 LEU X 268     157.130 117.070 228.487  1.00  0.00           C
ATOM   4358 HD21 LEU X 268     157.483 116.753 229.468  1.00  0.00           H
ATOM   4359 HD22 LEU X 268     158.034 117.082 227.878  1.00  0.00           H
ATOM   4360 HD23 LEU X 268     156.662 118.033 228.284  1.00  0.00           H
ATOM   4361  C   LEU X 268     153.430 113.871 229.780  1.00  0.00           C
ATOM   4362  O   LEU X 268     153.685 112.671 229.848  1.00  0.00           O
ATOM   4363  N   ILE X 269     152.619 114.522 230.667  1.00  0.00           N
ATOM   4364  H   ILE X 269     152.405 115.490 230.473  1.00  0.00           H
ATOM   4365  CA  ILE X 269     151.974 113.892 231.868  1.00  0.00           C
ATOM   4366  HA  ILE X 269     152.780 113.509 232.493  1.00  0.00           H
ATOM   4367  CB  ILE X 269     151.279 114.913 232.805  1.00  0.00           C
ATOM   4368  HB  ILE X 269     150.616 115.427 232.109  1.00  0.00           H
ATOM   4369  CG2 ILE X 269     150.305 114.276 233.773  1.00  0.00           C
ATOM   4370 HG21 ILE X 269     150.172 115.126 234.441  1.00  0.00           H
ATOM   4371 HG22 ILE X 269     150.669 113.397 234.306  1.00  0.00           H
ATOM   4372 HG23 ILE X 269     149.340 114.029 233.329  1.00  0.00           H
ATOM   4373  CG1 ILE X 269     152.424 115.767 233.523  1.00  0.00           C
ATOM   4374 HG12 ILE X 269     152.738 115.316 234.464  1.00  0.00           H
ATOM   4375 HG13 ILE X 269     153.336 115.813 232.927  1.00  0.00           H
ATOM   4376  CD1 ILE X 269     152.001 117.222 233.753  1.00  0.00           C
ATOM   4377 HD11 ILE X 269     151.219 117.392 234.493  1.00  0.00           H
ATOM   4378 HD12 ILE X 269     151.583 117.579 232.812  1.00  0.00           H
ATOM   4379 HD13 ILE X 269     152.719 118.003 234.004  1.00  0.00           H
ATOM   4380  C   ILE X 269     150.998 112.659 231.531  1.00  0.00           C
ATOM   4381  O   ILE X 269     150.975 111.576 232.196  1.00  0.00           O
ATOM   4382  N   LYS X 270     150.335 112.799 230.368  1.00  0.00           N
ATOM   4383  H   LYS X 270     150.322 113.691 229.894  1.00  0.00           H
ATOM   4384  CA  LYS X 270     149.510 111.658 229.836  1.00  0.00           C
ATOM   4385  HA  LYS X 270     149.011 111.185 230.681  1.00  0.00           H
ATOM   4386  CB  LYS X 270     148.502 112.136 228.839  1.00  0.00           C
ATOM   4387  HB2 LYS X 270     147.968 112.962 229.307  1.00  0.00           H
ATOM   4388  HB3 LYS X 270     149.022 112.469 227.940  1.00  0.00           H
ATOM   4389  CG  LYS X 270     147.424 111.153 228.377  1.00  0.00           C
ATOM   4390  HG2 LYS X 270     146.882 111.689 227.598  1.00  0.00           H
ATOM   4391  HG3 LYS X 270     147.903 110.215 228.093  1.00  0.00           H
ATOM   4392  CD  LYS X 270     146.479 110.757 229.539  1.00  0.00           C
ATOM   4393  HD2 LYS X 270     147.089 110.302 230.319  1.00  0.00           H
ATOM   4394  HD3 LYS X 270     146.017 111.671 229.912  1.00  0.00           H
ATOM   4395  CE  LYS X 270     145.446 109.863 228.826  1.00  0.00           C
ATOM   4396  HE2 LYS X 270     145.230 110.354 227.878  1.00  0.00           H
ATOM   4397  HE3 LYS X 270     145.853 108.883 228.578  1.00  0.00           H
ATOM   4398  NZ  LYS X 270     144.237 109.679 229.716  1.00  0.00           N
ATOM   4399  HZ1 LYS X 270     143.691 110.524 229.637  1.00  0.00           H
ATOM   4400  HZ2 LYS X 270     144.569 109.681 230.670  1.00  0.00           H
ATOM   4401  HZ3 LYS X 270     143.816 108.785 229.509  1.00  0.00           H
ATOM   4402  C   LYS X 270     150.426 110.617 229.134  1.00  0.00           C
ATOM   4403  O   LYS X 270     150.211 109.413 229.426  1.00  0.00           O
ATOM   4404  N   MET X 271     151.402 110.993 228.291  1.00  0.00           N
ATOM   4405  H   MET X 271     151.594 111.947 228.022  1.00  0.00           H
ATOM   4406  CA  MET X 271     152.346 109.944 227.771  1.00  0.00           C
ATOM   4407  HA  MET X 271     151.804 109.284 227.094  1.00  0.00           H
ATOM   4408  CB  MET X 271     153.488 110.549 226.965  1.00  0.00           C
ATOM   4409  HB2 MET X 271     153.940 111.374 227.515  1.00  0.00           H
ATOM   4410  HB3 MET X 271     154.293 109.832 226.801  1.00  0.00           H
ATOM   4411  CG  MET X 271     153.071 111.063 225.547  1.00  0.00           C
ATOM   4412  HG2 MET X 271     152.869 110.077 225.127  1.00  0.00           H
ATOM   4413  HG3 MET X 271     152.173 111.666 225.684  1.00  0.00           H
ATOM   4414  SD  MET X 271     154.289 112.010 224.687  1.00  0.00           S
ATOM   4415  CE  MET X 271     155.481 110.609 224.242  1.00  0.00           C
ATOM   4416  HE1 MET X 271     156.210 110.971 223.517  1.00  0.00           H
ATOM   4417  HE2 MET X 271     156.061 110.203 225.072  1.00  0.00           H
ATOM   4418  HE3 MET X 271     154.807 109.874 223.801  1.00  0.00           H
ATOM   4419  C   MET X 271     153.022 109.087 228.902  1.00  0.00           C
ATOM   4420  O   MET X 271     153.096 107.874 228.773  1.00  0.00           O
ATOM   4421  N   GLU X 272     153.535 109.779 229.890  1.00  0.00           N
ATOM   4422  H   GLU X 272     153.504 110.785 229.810  1.00  0.00           H
ATOM   4423  CA  GLU X 272     154.152 109.192 231.088  1.00  0.00           C
ATOM   4424  HA  GLU X 272     155.069 108.664 230.825  1.00  0.00           H
ATOM   4425  CB  GLU X 272     154.535 110.324 232.030  1.00  0.00           C
ATOM   4426  HB2 GLU X 272     155.347 110.859 231.537  1.00  0.00           H
ATOM   4427  HB3 GLU X 272     153.698 111.015 232.124  1.00  0.00           H
ATOM   4428  CG  GLU X 272     155.139 109.880 233.374  1.00  0.00           C
ATOM   4429  HG2 GLU X 272     155.470 110.784 233.885  1.00  0.00           H
ATOM   4430  HG3 GLU X 272     154.422 109.360 234.010  1.00  0.00           H
ATOM   4431  CD  GLU X 272     156.425 109.040 233.230  1.00  0.00           C
ATOM   4432  OE1 GLU X 272     156.762 108.191 234.108  1.00  0.00           O
ATOM   4433  OE2 GLU X 272     157.147 109.165 232.192  1.00  0.00           O
ATOM   4434  C   GLU X 272     153.331 108.140 231.789  1.00  0.00           C
ATOM   4435  O   GLU X 272     153.870 107.183 232.393  1.00  0.00           O
ATOM   4436  N   LYS X 273     151.962 108.174 231.740  1.00  0.00           N
ATOM   4437  H   LYS X 273     151.542 108.866 231.136  1.00  0.00           H
ATOM   4438  CA  LYS X 273     151.145 107.057 232.128  1.00  0.00           C
ATOM   4439  HA  LYS X 273     151.672 106.384 232.803  1.00  0.00           H
ATOM   4440  CB  LYS X 273     149.828 107.514 232.821  1.00  0.00           C
ATOM   4441  HB2 LYS X 273     149.361 108.150 232.069  1.00  0.00           H
ATOM   4442  HB3 LYS X 273     149.227 106.655 233.120  1.00  0.00           H
ATOM   4443  CG  LYS X 273     149.873 108.352 234.137  1.00  0.00           C
ATOM   4444  HG2 LYS X 273     150.699 109.064 234.148  1.00  0.00           H
ATOM   4445  HG3 LYS X 273     148.858 108.741 234.223  1.00  0.00           H
ATOM   4446  CD  LYS X 273     150.079 107.397 235.365  1.00  0.00           C
ATOM   4447  HD2 LYS X 273     149.586 106.440 235.191  1.00  0.00           H
ATOM   4448  HD3 LYS X 273     151.145 107.185 235.441  1.00  0.00           H
ATOM   4449  CE  LYS X 273     149.608 107.911 236.734  1.00  0.00           C
ATOM   4450  HE2 LYS X 273     148.521 107.920 236.651  1.00  0.00           H
ATOM   4451  HE3 LYS X 273     149.917 107.143 237.442  1.00  0.00           H
ATOM   4452  NZ  LYS X 273     150.298 109.206 237.095  1.00  0.00           N
ATOM   4453  HZ1 LYS X 273     149.955 110.007 236.583  1.00  0.00           H
ATOM   4454  HZ2 LYS X 273     151.291 109.225 236.910  1.00  0.00           H
ATOM   4455  HZ3 LYS X 273     150.156 109.423 238.072  1.00  0.00           H
ATOM   4456  C   LYS X 273     150.774 106.074 230.946  1.00  0.00           C
ATOM   4457  O   LYS X 273     150.742 104.830 231.099  1.00  0.00           O
ATOM   4458  N   GLU X 274     150.379 106.471 229.717  1.00  0.00           N
ATOM   4459  H   GLU X 274     150.464 107.457 229.515  1.00  0.00           H
ATOM   4460  CA  GLU X 274     150.057 105.592 228.511  1.00  0.00           C
ATOM   4461  HA  GLU X 274     149.228 104.931 228.764  1.00  0.00           H
ATOM   4462  CB  GLU X 274     149.624 106.631 227.459  1.00  0.00           C
ATOM   4463  HB2 GLU X 274     150.504 107.221 227.204  1.00  0.00           H
ATOM   4464  HB3 GLU X 274     149.448 106.155 226.495  1.00  0.00           H
ATOM   4465  CG  GLU X 274     148.356 107.340 227.935  1.00  0.00           C
ATOM   4466  HG2 GLU X 274     148.473 107.806 228.914  1.00  0.00           H
ATOM   4467  HG3 GLU X 274     148.087 108.140 227.246  1.00  0.00           H
ATOM   4468  CD  GLU X 274     147.104 106.446 227.754  1.00  0.00           C
ATOM   4469  OE1 GLU X 274     146.550 106.033 226.690  1.00  0.00           O
ATOM   4470  OE2 GLU X 274     146.477 106.226 228.832  1.00  0.00           O
ATOM   4471  C   GLU X 274     151.182 104.740 227.934  1.00  0.00           C
ATOM   4472  O   GLU X 274     150.886 103.690 227.385  1.00  0.00           O
ATOM   4473  N   LYS X 275     152.440 105.172 228.154  1.00  0.00           N
ATOM   4474  H   LYS X 275     152.543 105.976 228.756  1.00  0.00           H
ATOM   4475  CA  LYS X 275     153.644 104.366 227.797  1.00  0.00           C
ATOM   4476  HA  LYS X 275     153.476 104.227 226.729  1.00  0.00           H
ATOM   4477  CB  LYS X 275     155.004 105.104 228.019  1.00  0.00           C
ATOM   4478  HB2 LYS X 275     155.738 104.474 227.516  1.00  0.00           H
ATOM   4479  HB3 LYS X 275     155.065 106.032 227.450  1.00  0.00           H
ATOM   4480  CG  LYS X 275     155.230 105.514 229.534  1.00  0.00           C
ATOM   4481  HG2 LYS X 275     155.559 106.553 229.538  1.00  0.00           H
ATOM   4482  HG3 LYS X 275     154.266 105.401 230.031  1.00  0.00           H
ATOM   4483  CD  LYS X 275     156.228 104.665 230.247  1.00  0.00           C
ATOM   4484  HD2 LYS X 275     155.771 103.678 230.181  1.00  0.00           H
ATOM   4485  HD3 LYS X 275     157.195 104.848 229.778  1.00  0.00           H
ATOM   4486  CE  LYS X 275     156.458 104.918 231.737  1.00  0.00           C
ATOM   4487  HE2 LYS X 275     155.566 104.723 232.333  1.00  0.00           H
ATOM   4488  HE3 LYS X 275     157.114 104.158 232.161  1.00  0.00           H
ATOM   4489  NZ  LYS X 275     157.108 106.194 232.017  1.00  0.00           N
ATOM   4490  HZ1 LYS X 275     156.497 106.993 232.108  1.00  0.00           H
ATOM   4491  HZ2 LYS X 275     157.782 106.420 231.300  1.00  0.00           H
ATOM   4492  HZ3 LYS X 275     157.553 106.098 232.919  1.00  0.00           H
ATOM   4493  C   LYS X 275     153.638 102.926 228.341  1.00  0.00           C
ATOM   4494  O   LYS X 275     154.465 102.147 227.963  1.00  0.00           O
ATOM   4495  N   GLN X 276     152.827 102.617 229.334  1.00  0.00           N
ATOM   4496  H   GLN X 276     152.206 103.331 229.686  1.00  0.00           H
ATOM   4497  CA  GLN X 276     152.581 101.202 229.699  1.00  0.00           C
ATOM   4498  HA  GLN X 276     153.555 100.847 230.036  1.00  0.00           H
ATOM   4499  CB  GLN X 276     151.735 101.103 230.975  1.00  0.00           C
ATOM   4500  HB2 GLN X 276     151.735 100.036 231.201  1.00  0.00           H
ATOM   4501  HB3 GLN X 276     152.263 101.637 231.765  1.00  0.00           H
ATOM   4502  CG  GLN X 276     150.241 101.463 230.848  1.00  0.00           C
ATOM   4503  HG2 GLN X 276     150.038 102.344 230.238  1.00  0.00           H
ATOM   4504  HG3 GLN X 276     149.811 100.588 230.362  1.00  0.00           H
ATOM   4505  CD  GLN X 276     149.581 101.788 232.169  1.00  0.00           C
ATOM   4506  OE1 GLN X 276     148.798 100.978 232.701  1.00  0.00           O
ATOM   4507  NE2 GLN X 276     149.875 102.885 232.730  1.00  0.00           N
ATOM   4508 HE21 GLN X 276     149.128 103.222 233.321  1.00  0.00           H
ATOM   4509 HE22 GLN X 276     150.459 103.518 232.204  1.00  0.00           H
ATOM   4510  C   GLN X 276     152.071 100.258 228.540  1.00  0.00           C
ATOM   4511  O   GLN X 276     152.301  99.067 228.600  1.00  0.00           O
ATOM   4512  N   ASN X 277     151.266 100.752 227.607  1.00  0.00           N
ATOM   4513  H   ASN X 277     151.172 101.757 227.580  1.00  0.00           H
ATOM   4514  CA  ASN X 277     150.748 100.081 226.468  1.00  0.00           C
ATOM   4515  HA  ASN X 277     150.119  99.208 226.639  1.00  0.00           H
ATOM   4516  CB  ASN X 277     149.958 101.121 225.723  1.00  0.00           C
ATOM   4517  HB2 ASN X 277     149.306 101.552 226.483  1.00  0.00           H
ATOM   4518  HB3 ASN X 277     150.595 101.971 225.478  1.00  0.00           H
ATOM   4519  CG  ASN X 277     149.167 100.815 224.485  1.00  0.00           C
ATOM   4520  OD1 ASN X 277     149.206  99.716 223.958  1.00  0.00           O
ATOM   4521  ND2 ASN X 277     148.433 101.737 223.867  1.00  0.00           N
ATOM   4522 HD21 ASN X 277     148.088 102.557 224.345  1.00  0.00           H
ATOM   4523 HD22 ASN X 277     148.313 101.560 222.880  1.00  0.00           H
ATOM   4524  C   ASN X 277     151.929  99.581 225.522  1.00  0.00           C
ATOM   4525  O   ASN X 277     152.875 100.345 225.392  1.00  0.00           O
ATOM   4526  N   GLN X 278     151.761  98.501 224.823  1.00  0.00           N
ATOM   4527  H   GLN X 278     150.928  97.961 225.006  1.00  0.00           H
ATOM   4528  CA  GLN X 278     152.741  98.027 223.811  1.00  0.00           C
ATOM   4529  HA  GLN X 278     153.733  98.001 224.264  1.00  0.00           H
ATOM   4530  CB  GLN X 278     152.447  96.589 223.364  1.00  0.00           C
ATOM   4531  HB2 GLN X 278     152.158  95.943 224.193  1.00  0.00           H
ATOM   4532  HB3 GLN X 278     151.675  96.742 222.610  1.00  0.00           H
ATOM   4533  CG  GLN X 278     153.635  95.753 222.780  1.00  0.00           C
ATOM   4534  HG2 GLN X 278     154.461  96.404 222.494  1.00  0.00           H
ATOM   4535  HG3 GLN X 278     154.048  95.140 223.581  1.00  0.00           H
ATOM   4536  CD  GLN X 278     153.315  94.825 221.561  1.00  0.00           C
ATOM   4537  OE1 GLN X 278     152.170  94.747 221.103  1.00  0.00           O
ATOM   4538  NE2 GLN X 278     154.251  94.024 221.052  1.00  0.00           N
ATOM   4539 HE21 GLN X 278     153.882  93.342 220.406  1.00  0.00           H
ATOM   4540 HE22 GLN X 278     155.131  93.753 221.468  1.00  0.00           H
ATOM   4541  C   GLN X 278     152.938  98.918 222.539  1.00  0.00           C
ATOM   4542  O   GLN X 278     154.040  98.959 222.055  1.00  0.00           O
ATOM   4543  N   GLN X 279     151.883  99.673 222.168  1.00  0.00           N
ATOM   4544  H   GLN X 279     150.984  99.729 222.625  1.00  0.00           H
ATOM   4545  CA  GLN X 279     152.003 100.656 221.032  1.00  0.00           C
ATOM   4546  HA  GLN X 279     152.949 101.197 221.033  1.00  0.00           H
ATOM   4547  CB  GLN X 279     151.619 100.039 219.682  1.00  0.00           C
ATOM   4548  HB2 GLN X 279     150.604  99.654 219.782  1.00  0.00           H
ATOM   4549  HB3 GLN X 279     151.671 100.876 218.987  1.00  0.00           H
ATOM   4550  CG  GLN X 279     152.550  98.876 219.112  1.00  0.00           C
ATOM   4551  HG2 GLN X 279     152.569  98.146 219.921  1.00  0.00           H
ATOM   4552  HG3 GLN X 279     152.015  98.399 218.291  1.00  0.00           H
ATOM   4553  CD  GLN X 279     153.925  99.275 218.764  1.00  0.00           C
ATOM   4554  OE1 GLN X 279     154.292 100.420 218.564  1.00  0.00           O
ATOM   4555  NE2 GLN X 279     154.892  98.378 218.779  1.00  0.00           N
ATOM   4556 HE21 GLN X 279     155.810  98.644 218.453  1.00  0.00           H
ATOM   4557 HE22 GLN X 279     154.626  97.407 218.869  1.00  0.00           H
ATOM   4558  C   GLN X 279     151.048 101.826 221.488  1.00  0.00           C
ATOM   4559  O   GLN X 279     149.859 101.794 221.165  1.00  0.00           O
ATOM   4560  N   SER X 280     151.594 102.846 222.081  1.00  0.00           N
ATOM   4561  H   SER X 280     152.576 102.889 222.311  1.00  0.00           H
ATOM   4562  CA  SER X 280     150.748 103.916 222.486  1.00  0.00           C
ATOM   4563  HA  SER X 280     149.926 103.452 223.031  1.00  0.00           H
ATOM   4564  CB  SER X 280     151.356 104.804 223.593  1.00  0.00           C
ATOM   4565  HB2 SER X 280     151.634 104.111 224.388  1.00  0.00           H
ATOM   4566  HB3 SER X 280     152.257 105.194 223.120  1.00  0.00           H
ATOM   4567  OG  SER X 280     150.439 105.873 223.920  1.00  0.00           O
ATOM   4568  HG  SER X 280     149.594 105.507 224.192  1.00  0.00           H
ATOM   4569  C   SER X 280     150.313 104.847 221.309  1.00  0.00           C
ATOM   4570  O   SER X 280     151.053 105.149 220.363  1.00  0.00           O
ATOM   4571  N   GLU X 281     149.060 105.202 221.365  1.00  0.00           N
ATOM   4572  H   GLU X 281     148.379 104.838 222.016  1.00  0.00           H
ATOM   4573  CA  GLU X 281     148.408 106.226 220.541  1.00  0.00           C
ATOM   4574  HA  GLU X 281     148.650 105.895 219.530  1.00  0.00           H
ATOM   4575  CB  GLU X 281     146.856 106.162 220.693  1.00  0.00           C
ATOM   4576  HB2 GLU X 281     146.624 106.475 221.711  1.00  0.00           H
ATOM   4577  HB3 GLU X 281     146.378 106.828 219.975  1.00  0.00           H
ATOM   4578  CG  GLU X 281     146.283 104.790 220.367  1.00  0.00           C
ATOM   4579  HG2 GLU X 281     145.218 104.895 220.165  1.00  0.00           H
ATOM   4580  HG3 GLU X 281     146.772 104.431 219.462  1.00  0.00           H
ATOM   4581  CD  GLU X 281     146.361 103.746 221.522  1.00  0.00           C
ATOM   4582  OE1 GLU X 281     146.740 104.093 222.730  1.00  0.00           O
ATOM   4583  OE2 GLU X 281     145.973 102.629 221.238  1.00  0.00           O
ATOM   4584  C   GLU X 281     148.985 107.621 220.809  1.00  0.00           C
ATOM   4585  O   GLU X 281     149.083 108.425 219.881  1.00  0.00           O
ATOM   4586  N   PHE X 282     149.354 107.943 222.096  1.00  0.00           N
ATOM   4587  H   PHE X 282     149.467 107.118 222.668  1.00  0.00           H
ATOM   4588  CA  PHE X 282     150.153 109.114 222.438  1.00  0.00           C
ATOM   4589  HA  PHE X 282     149.747 109.946 221.862  1.00  0.00           H
ATOM   4590  CB  PHE X 282     150.015 109.464 223.900  1.00  0.00           C
ATOM   4591  HB2 PHE X 282     150.298 108.721 224.645  1.00  0.00           H
ATOM   4592  HB3 PHE X 282     150.723 110.270 224.092  1.00  0.00           H
ATOM   4593  CG  PHE X 282     148.645 109.909 224.297  1.00  0.00           C
ATOM   4594  CD1 PHE X 282     148.357 111.301 224.292  1.00  0.00           C
ATOM   4595  HD1 PHE X 282     149.202 111.900 223.987  1.00  0.00           H
ATOM   4596  CE1 PHE X 282     147.072 111.785 224.787  1.00  0.00           C
ATOM   4597  HE1 PHE X 282     146.814 112.831 224.869  1.00  0.00           H
ATOM   4598  CZ  PHE X 282     146.079 110.852 225.218  1.00  0.00           C
ATOM   4599  HZ  PHE X 282     145.194 111.118 225.778  1.00  0.00           H
ATOM   4600  CE2 PHE X 282     146.387 109.483 225.190  1.00  0.00           C
ATOM   4601  HE2 PHE X 282     145.710 108.721 225.547  1.00  0.00           H
ATOM   4602  CD2 PHE X 282     147.668 109.062 224.830  1.00  0.00           C
ATOM   4603  HD2 PHE X 282     147.813 107.992 224.867  1.00  0.00           H
ATOM   4604  C   PHE X 282     151.606 108.996 221.951  1.00  0.00           C
ATOM   4605  O   PHE X 282     152.463 108.418 222.618  1.00  0.00           O
ATOM   4606  N   THR X 283     151.980 109.611 220.845  1.00  0.00           N
ATOM   4607  H   THR X 283     151.149 110.027 220.451  1.00  0.00           H
ATOM   4608  CA  THR X 283     153.279 109.763 220.205  1.00  0.00           C
ATOM   4609  HA  THR X 283     154.081 109.432 220.865  1.00  0.00           H
ATOM   4610  CB  THR X 283     153.428 108.831 219.016  1.00  0.00           C
ATOM   4611  HB  THR X 283     154.458 108.503 218.880  1.00  0.00           H
ATOM   4612  CG2 THR X 283     152.603 107.521 218.914  1.00  0.00           C
ATOM   4613 HG21 THR X 283     151.558 107.809 219.023  1.00  0.00           H
ATOM   4614 HG22 THR X 283     152.824 106.855 219.749  1.00  0.00           H
ATOM   4615 HG23 THR X 283     152.762 107.109 217.917  1.00  0.00           H
ATOM   4616  OG1 THR X 283     153.172 109.560 217.839  1.00  0.00           O
ATOM   4617  HG1 THR X 283     153.456 109.070 217.064  1.00  0.00           H
ATOM   4618  C   THR X 283     153.554 111.261 219.868  1.00  0.00           C
ATOM   4619  O   THR X 283     152.649 112.054 219.833  1.00  0.00           O
ATOM   4620  N   ILE X 284     154.847 111.469 219.628  1.00  0.00           N
ATOM   4621  H   ILE X 284     155.515 110.717 219.534  1.00  0.00           H
ATOM   4622  CA  ILE X 284     155.296 112.868 219.379  1.00  0.00           C
ATOM   4623  HA  ILE X 284     154.747 113.495 220.081  1.00  0.00           H
ATOM   4624  CB  ILE X 284     156.782 112.991 219.702  1.00  0.00           C
ATOM   4625  HB  ILE X 284     157.337 112.345 219.022  1.00  0.00           H
ATOM   4626  CG2 ILE X 284     157.315 114.492 219.573  1.00  0.00           C
ATOM   4627 HG21 ILE X 284     156.607 115.107 220.129  1.00  0.00           H
ATOM   4628 HG22 ILE X 284     157.335 114.742 218.512  1.00  0.00           H
ATOM   4629 HG23 ILE X 284     158.333 114.583 219.953  1.00  0.00           H
ATOM   4630  CG1 ILE X 284     157.033 112.582 221.196  1.00  0.00           C
ATOM   4631 HG12 ILE X 284     156.808 111.527 221.352  1.00  0.00           H
ATOM   4632 HG13 ILE X 284     158.014 112.873 221.571  1.00  0.00           H
ATOM   4633  CD1 ILE X 284     156.158 113.334 222.252  1.00  0.00           C
ATOM   4634 HD11 ILE X 284     156.567 113.197 223.253  1.00  0.00           H
ATOM   4635 HD12 ILE X 284     155.116 113.067 222.075  1.00  0.00           H
ATOM   4636 HD13 ILE X 284     156.091 114.422 222.234  1.00  0.00           H
ATOM   4637  C   ILE X 284     155.007 113.359 217.967  1.00  0.00           C
ATOM   4638  O   ILE X 284     154.580 114.515 217.804  1.00  0.00           O
ATOM   4639  N   GLU X 285     154.793 112.414 217.012  1.00  0.00           N
ATOM   4640  H   GLU X 285     155.116 111.482 217.230  1.00  0.00           H
ATOM   4641  CA  GLU X 285     154.324 112.679 215.657  1.00  0.00           C
ATOM   4642  HA  GLU X 285     154.787 113.518 215.138  1.00  0.00           H
ATOM   4643  CB  GLU X 285     154.307 111.423 214.747  1.00  0.00           C
ATOM   4644  HB2 GLU X 285     153.778 110.603 215.232  1.00  0.00           H
ATOM   4645  HB3 GLU X 285     153.733 111.654 213.850  1.00  0.00           H
ATOM   4646  CG  GLU X 285     155.639 110.770 214.290  1.00  0.00           C
ATOM   4647  HG2 GLU X 285     156.409 110.970 215.036  1.00  0.00           H
ATOM   4648  HG3 GLU X 285     155.530 109.691 214.187  1.00  0.00           H
ATOM   4649  CD  GLU X 285     156.140 111.399 213.035  1.00  0.00           C
ATOM   4650  OE1 GLU X 285     156.773 110.738 212.215  1.00  0.00           O
ATOM   4651  OE2 GLU X 285     155.730 112.590 212.783  1.00  0.00           O
ATOM   4652  C   GLU X 285     152.896 113.096 215.838  1.00  0.00           C
ATOM   4653  O   GLU X 285     152.440 114.001 215.161  1.00  0.00           O
ATOM   4654  N   ASN X 286     152.156 112.503 216.758  1.00  0.00           N
ATOM   4655  H   ASN X 286     152.637 111.845 217.354  1.00  0.00           H
ATOM   4656  CA  ASN X 286     150.691 112.748 217.000  1.00  0.00           C
ATOM   4657  HA  ASN X 286     150.290 112.744 215.987  1.00  0.00           H
ATOM   4658  CB  ASN X 286     150.132 111.588 217.825  1.00  0.00           C
ATOM   4659  HB2 ASN X 286     150.475 110.673 217.341  1.00  0.00           H
ATOM   4660  HB3 ASN X 286     150.601 111.525 218.807  1.00  0.00           H
ATOM   4661  CG  ASN X 286     148.656 111.611 217.916  1.00  0.00           C
ATOM   4662  OD1 ASN X 286     147.908 112.533 217.587  1.00  0.00           O
ATOM   4663  ND2 ASN X 286     147.968 110.575 218.267  1.00  0.00           N
ATOM   4664 HD21 ASN X 286     148.353 109.732 218.668  1.00  0.00           H
ATOM   4665 HD22 ASN X 286     146.982 110.788 218.320  1.00  0.00           H
ATOM   4666  C   ASN X 286     150.523 114.155 217.566  1.00  0.00           C
ATOM   4667  O   ASN X 286     149.600 114.812 217.265  1.00  0.00           O
ATOM   4668  N   LEU X 287     151.399 114.581 218.450  1.00  0.00           N
ATOM   4669  H   LEU X 287     152.071 113.934 218.836  1.00  0.00           H
ATOM   4670  CA  LEU X 287     151.297 115.936 219.023  1.00  0.00           C
ATOM   4671  HA  LEU X 287     150.361 116.071 219.565  1.00  0.00           H
ATOM   4672  CB  LEU X 287     152.453 116.013 220.166  1.00  0.00           C
ATOM   4673  HB2 LEU X 287     152.229 115.245 220.907  1.00  0.00           H
ATOM   4674  HB3 LEU X 287     153.451 115.763 219.807  1.00  0.00           H
ATOM   4675  CG  LEU X 287     152.499 117.418 220.906  1.00  0.00           C
ATOM   4676  HG  LEU X 287     152.917 118.146 220.210  1.00  0.00           H
ATOM   4677  CD1 LEU X 287     151.159 117.916 221.456  1.00  0.00           C
ATOM   4678 HD11 LEU X 287     150.510 118.213 220.633  1.00  0.00           H
ATOM   4679 HD12 LEU X 287     151.272 118.865 221.981  1.00  0.00           H
ATOM   4680 HD13 LEU X 287     150.728 117.219 222.175  1.00  0.00           H
ATOM   4681  CD2 LEU X 287     153.514 117.429 222.006  1.00  0.00           C
ATOM   4682 HD21 LEU X 287     153.107 116.747 222.753  1.00  0.00           H
ATOM   4683 HD22 LEU X 287     154.463 117.063 221.613  1.00  0.00           H
ATOM   4684 HD23 LEU X 287     153.562 118.449 222.385  1.00  0.00           H
ATOM   4685  C   LEU X 287     151.379 117.077 218.069  1.00  0.00           C
ATOM   4686  O   LEU X 287     150.623 117.973 218.213  1.00  0.00           O
ATOM   4687  N   VAL X 288     152.187 116.990 217.046  1.00  0.00           N
ATOM   4688  H   VAL X 288     152.649 116.105 216.898  1.00  0.00           H
ATOM   4689  CA  VAL X 288     152.229 118.038 216.016  1.00  0.00           C
ATOM   4690  HA  VAL X 288     152.281 119.074 216.351  1.00  0.00           H
ATOM   4691  CB  VAL X 288     153.412 117.740 215.041  1.00  0.00           C
ATOM   4692  HB  VAL X 288     153.178 116.801 214.539  1.00  0.00           H
ATOM   4693  CG1 VAL X 288     153.515 118.615 213.785  1.00  0.00           C
ATOM   4694 HG11 VAL X 288     154.259 118.133 213.150  1.00  0.00           H
ATOM   4695 HG12 VAL X 288     152.547 118.562 213.288  1.00  0.00           H
ATOM   4696 HG13 VAL X 288     153.726 119.659 214.020  1.00  0.00           H
ATOM   4697  CG2 VAL X 288     154.823 117.686 215.655  1.00  0.00           C
ATOM   4698 HG21 VAL X 288     155.524 117.277 214.927  1.00  0.00           H
ATOM   4699 HG22 VAL X 288     154.839 116.961 216.468  1.00  0.00           H
ATOM   4700 HG23 VAL X 288     155.243 118.678 215.816  1.00  0.00           H
ATOM   4701  C   VAL X 288     150.878 117.899 215.227  1.00  0.00           C
ATOM   4702  O   VAL X 288     150.274 118.909 214.965  1.00  0.00           O
ATOM   4703  N   ILE X 289     150.405 116.683 214.940  1.00  0.00           N
ATOM   4704  H   ILE X 289     151.001 115.915 215.213  1.00  0.00           H
ATOM   4705  CA  ILE X 289     149.203 116.470 214.104  1.00  0.00           C
ATOM   4706  HA  ILE X 289     149.326 116.983 213.150  1.00  0.00           H
ATOM   4707  CB  ILE X 289     149.280 115.028 213.648  1.00  0.00           C
ATOM   4708  HB  ILE X 289     149.472 114.411 214.526  1.00  0.00           H
ATOM   4709  CG2 ILE X 289     147.973 114.851 212.837  1.00  0.00           C
ATOM   4710 HG21 ILE X 289     147.846 115.566 212.024  1.00  0.00           H
ATOM   4711 HG22 ILE X 289     147.149 114.914 213.548  1.00  0.00           H
ATOM   4712 HG23 ILE X 289     147.988 113.817 212.492  1.00  0.00           H
ATOM   4713  CG1 ILE X 289     150.488 114.760 212.662  1.00  0.00           C
ATOM   4714 HG12 ILE X 289     150.434 115.349 211.747  1.00  0.00           H
ATOM   4715 HG13 ILE X 289     151.428 115.113 213.085  1.00  0.00           H
ATOM   4716  CD1 ILE X 289     150.697 113.357 212.235  1.00  0.00           C
ATOM   4717 HD11 ILE X 289     149.862 113.142 211.568  1.00  0.00           H
ATOM   4718 HD12 ILE X 289     150.692 112.642 213.058  1.00  0.00           H
ATOM   4719 HD13 ILE X 289     151.614 113.301 211.649  1.00  0.00           H
ATOM   4720  C   ILE X 289     147.954 116.963 214.884  1.00  0.00           C
ATOM   4721  O   ILE X 289     147.102 117.569 214.238  1.00  0.00           O
ATOM   4722  N   THR X 290     147.832 116.823 216.197  1.00  0.00           N
ATOM   4723  H   THR X 290     148.449 116.152 216.632  1.00  0.00           H
ATOM   4724  CA  THR X 290     146.853 117.383 217.164  1.00  0.00           C
ATOM   4725  HA  THR X 290     145.866 117.128 216.780  1.00  0.00           H
ATOM   4726  CB  THR X 290     147.035 116.700 218.553  1.00  0.00           C
ATOM   4727  HB  THR X 290     147.932 117.081 219.040  1.00  0.00           H
ATOM   4728  CG2 THR X 290     145.906 117.147 219.476  1.00  0.00           C
ATOM   4729 HG21 THR X 290     144.857 116.994 219.223  1.00  0.00           H
ATOM   4730 HG22 THR X 290     146.059 118.215 219.631  1.00  0.00           H
ATOM   4731 HG23 THR X 290     146.026 116.507 220.350  1.00  0.00           H
ATOM   4732  OG1 THR X 290     146.945 115.312 218.470  1.00  0.00           O
ATOM   4733  HG1 THR X 290     147.782 114.944 218.176  1.00  0.00           H
ATOM   4734  C   THR X 290     146.838 118.921 217.242  1.00  0.00           C
ATOM   4735  O   THR X 290     145.804 119.493 217.011  1.00  0.00           O
ATOM   4736  N   ALA X 291     147.958 119.595 217.354  1.00  0.00           N
ATOM   4737  H   ALA X 291     148.901 119.240 217.415  1.00  0.00           H
ATOM   4738  CA  ALA X 291     147.984 121.008 217.389  1.00  0.00           C
ATOM   4739  HA  ALA X 291     147.270 121.293 218.161  1.00  0.00           H
ATOM   4740  CB  ALA X 291     149.363 121.485 217.692  1.00  0.00           C
ATOM   4741  HB1 ALA X 291     149.689 121.257 218.707  1.00  0.00           H
ATOM   4742  HB2 ALA X 291     149.471 122.562 217.563  1.00  0.00           H
ATOM   4743  HB3 ALA X 291     150.068 120.874 217.129  1.00  0.00           H
ATOM   4744  C   ALA X 291     147.445 121.576 216.020  1.00  0.00           C
ATOM   4745  O   ALA X 291     146.795 122.617 215.942  1.00  0.00           O
ATOM   4746  N   ALA X 292     147.946 121.002 214.921  1.00  0.00           N
ATOM   4747  H   ALA X 292     148.469 120.146 215.037  1.00  0.00           H
ATOM   4748  CA  ALA X 292     147.644 121.447 213.549  1.00  0.00           C
ATOM   4749  HA  ALA X 292     147.884 122.510 213.534  1.00  0.00           H
ATOM   4750  CB  ALA X 292     148.569 120.708 212.566  1.00  0.00           C
ATOM   4751  HB1 ALA X 292     148.273 119.659 212.563  1.00  0.00           H
ATOM   4752  HB2 ALA X 292     149.637 120.772 212.775  1.00  0.00           H
ATOM   4753  HB3 ALA X 292     148.385 121.132 211.580  1.00  0.00           H
ATOM   4754  C   ALA X 292     146.164 121.386 213.156  1.00  0.00           C
ATOM   4755  O   ALA X 292     145.609 122.255 212.512  1.00  0.00           O
ATOM   4756  N   ASP X 293     145.500 120.331 213.698  1.00  0.00           N
ATOM   4757  H   ASP X 293     145.985 119.570 214.153  1.00  0.00           H
ATOM   4758  CA  ASP X 293     144.083 120.166 213.748  1.00  0.00           C
ATOM   4759  HA  ASP X 293     143.700 120.293 212.735  1.00  0.00           H
ATOM   4760  CB  ASP X 293     143.681 118.741 214.235  1.00  0.00           C
ATOM   4761  HB2 ASP X 293     144.497 118.564 214.936  1.00  0.00           H
ATOM   4762  HB3 ASP X 293     142.784 118.754 214.854  1.00  0.00           H
ATOM   4763  CG  ASP X 293     143.697 117.628 213.106  1.00  0.00           C
ATOM   4764  OD1 ASP X 293     143.351 116.457 213.407  1.00  0.00           O
ATOM   4765  OD2 ASP X 293     144.156 117.878 211.967  1.00  0.00           O
ATOM   4766  C   ASP X 293     143.430 121.229 214.600  1.00  0.00           C
ATOM   4767  O   ASP X 293     142.727 122.054 214.058  1.00  0.00           O
ATOM   4768  N   LEU X 294     143.627 121.300 215.940  1.00  0.00           N
ATOM   4769  H   LEU X 294     144.306 120.656 216.320  1.00  0.00           H
ATOM   4770  CA  LEU X 294     142.915 122.259 216.852  1.00  0.00           C
ATOM   4771  HA  LEU X 294     141.845 122.123 216.697  1.00  0.00           H
ATOM   4772  CB  LEU X 294     143.320 122.009 218.339  1.00  0.00           C
ATOM   4773  HB2 LEU X 294     144.406 122.047 218.424  1.00  0.00           H
ATOM   4774  HB3 LEU X 294     142.964 122.879 218.890  1.00  0.00           H
ATOM   4775  CG  LEU X 294     142.742 120.763 219.033  1.00  0.00           C
ATOM   4776  HG  LEU X 294     143.089 119.870 218.513  1.00  0.00           H
ATOM   4777  CD1 LEU X 294     143.170 120.616 220.452  1.00  0.00           C
ATOM   4778 HD11 LEU X 294     143.159 121.576 220.969  1.00  0.00           H
ATOM   4779 HD12 LEU X 294     144.230 120.381 220.552  1.00  0.00           H
ATOM   4780 HD13 LEU X 294     142.665 119.871 221.066  1.00  0.00           H
ATOM   4781  CD2 LEU X 294     141.208 120.847 218.985  1.00  0.00           C
ATOM   4782 HD21 LEU X 294     140.804 120.894 217.974  1.00  0.00           H
ATOM   4783 HD22 LEU X 294     140.808 119.974 219.501  1.00  0.00           H
ATOM   4784 HD23 LEU X 294     141.004 121.739 219.576  1.00  0.00           H
ATOM   4785  C   LEU X 294     143.209 123.748 216.503  1.00  0.00           C
ATOM   4786  O   LEU X 294     142.284 124.490 216.220  1.00  0.00           O
ATOM   4787  N   LEU X 295     144.502 124.053 216.329  1.00  0.00           N
ATOM   4788  H   LEU X 295     145.237 123.456 216.681  1.00  0.00           H
ATOM   4789  CA  LEU X 295     144.882 125.464 215.918  1.00  0.00           C
ATOM   4790  HA  LEU X 295     144.373 126.145 216.600  1.00  0.00           H
ATOM   4791  CB  LEU X 295     146.470 125.689 216.016  1.00  0.00           C
ATOM   4792  HB2 LEU X 295     146.803 124.887 215.358  1.00  0.00           H
ATOM   4793  HB3 LEU X 295     146.703 126.639 215.535  1.00  0.00           H
ATOM   4794  CG  LEU X 295     147.259 125.457 217.282  1.00  0.00           C
ATOM   4795  HG  LEU X 295     147.165 124.393 217.497  1.00  0.00           H
ATOM   4796  CD1 LEU X 295     148.781 125.591 217.112  1.00  0.00           C
ATOM   4797 HD11 LEU X 295     149.020 126.598 216.771  1.00  0.00           H
ATOM   4798 HD12 LEU X 295     149.151 124.994 216.278  1.00  0.00           H
ATOM   4799 HD13 LEU X 295     149.374 125.431 218.012  1.00  0.00           H
ATOM   4800  CD2 LEU X 295     146.833 126.399 218.381  1.00  0.00           C
ATOM   4801 HD21 LEU X 295     147.132 127.410 218.104  1.00  0.00           H
ATOM   4802 HD22 LEU X 295     145.776 126.185 218.539  1.00  0.00           H
ATOM   4803 HD23 LEU X 295     147.398 126.135 219.276  1.00  0.00           H
ATOM   4804  C   LEU X 295     144.419 125.784 214.487  1.00  0.00           C
ATOM   4805  O   LEU X 295     144.022 126.907 214.246  1.00  0.00           O
ATOM   4806  N   GLY X 296     144.500 124.853 213.532  1.00  0.00           N
ATOM   4807  H   GLY X 296     144.850 123.971 213.880  1.00  0.00           H
ATOM   4808  CA  GLY X 296     144.128 125.006 212.131  1.00  0.00           C
ATOM   4809  HA2 GLY X 296     144.647 125.878 211.734  1.00  0.00           H
ATOM   4810  HA3 GLY X 296     144.183 124.067 211.580  1.00  0.00           H
ATOM   4811  C   GLY X 296     142.597 125.365 212.084  1.00  0.00           C
ATOM   4812  O   GLY X 296     142.116 126.187 211.267  1.00  0.00           O
ATOM   4813  N   ALA X 297     141.847 124.679 212.953  1.00  0.00           N
ATOM   4814  H   ALA X 297     142.285 124.084 213.643  1.00  0.00           H
ATOM   4815  CA  ALA X 297     140.348 124.915 213.142  1.00  0.00           C
ATOM   4816  HA  ALA X 297     139.877 124.877 212.159  1.00  0.00           H
ATOM   4817  CB  ALA X 297     139.718 123.715 213.773  1.00  0.00           C
ATOM   4818  HB1 ALA X 297     140.271 123.341 214.635  1.00  0.00           H
ATOM   4819  HB2 ALA X 297     139.592 122.953 213.004  1.00  0.00           H
ATOM   4820  HB3 ALA X 297     138.672 123.904 214.013  1.00  0.00           H
ATOM   4821  C   ALA X 297     140.040 126.293 213.847  1.00  0.00           C
ATOM   4822  O   ALA X 297     139.384 127.144 213.279  1.00  0.00           O
ATOM   4823  N   GLY X 298     140.617 126.568 215.063  1.00  0.00           N
ATOM   4824  H   GLY X 298     141.117 125.876 215.602  1.00  0.00           H
ATOM   4825  CA  GLY X 298     140.266 127.821 215.838  1.00  0.00           C
ATOM   4826  HA2 GLY X 298     139.184 127.926 215.762  1.00  0.00           H
ATOM   4827  HA3 GLY X 298     140.541 127.662 216.881  1.00  0.00           H
ATOM   4828  C   GLY X 298     140.883 129.036 215.260  1.00  0.00           C
ATOM   4829  O   GLY X 298     140.743 130.101 215.793  1.00  0.00           O
ATOM   4830  N   THR X 299     141.686 128.968 214.191  1.00  0.00           N
ATOM   4831  H   THR X 299     141.807 128.050 213.788  1.00  0.00           H
ATOM   4832  CA  THR X 299     142.236 130.107 213.407  1.00  0.00           C
ATOM   4833  HA  THR X 299     142.555 130.959 214.008  1.00  0.00           H
ATOM   4834  CB  THR X 299     143.489 129.647 212.670  1.00  0.00           C
ATOM   4835  HB  THR X 299     143.382 128.720 212.106  1.00  0.00           H
ATOM   4836  CG2 THR X 299     144.166 130.710 211.759  1.00  0.00           C
ATOM   4837 HG21 THR X 299     144.316 131.648 212.293  1.00  0.00           H
ATOM   4838 HG22 THR X 299     143.582 130.944 210.869  1.00  0.00           H
ATOM   4839 HG23 THR X 299     145.167 130.467 211.402  1.00  0.00           H
ATOM   4840  OG1 THR X 299     144.451 129.459 213.711  1.00  0.00           O
ATOM   4841  HG1 THR X 299     144.382 128.543 213.990  1.00  0.00           H
ATOM   4842  C   THR X 299     141.223 130.546 212.332  1.00  0.00           C
ATOM   4843  O   THR X 299     141.251 131.692 211.931  1.00  0.00           O
ATOM   4844  N   GLU X 300     140.312 129.673 211.890  1.00  0.00           N
ATOM   4845  H   GLU X 300     140.322 128.693 212.133  1.00  0.00           H
ATOM   4846  CA  GLU X 300     139.361 129.939 210.862  1.00  0.00           C
ATOM   4847  HA  GLU X 300     139.616 130.938 210.509  1.00  0.00           H
ATOM   4848  CB  GLU X 300     139.751 128.892 209.791  1.00  0.00           C
ATOM   4849  HB2 GLU X 300     140.717 129.185 209.381  1.00  0.00           H
ATOM   4850  HB3 GLU X 300     139.854 127.901 210.233  1.00  0.00           H
ATOM   4851  CG  GLU X 300     138.809 128.689 208.659  1.00  0.00           C
ATOM   4852  HG2 GLU X 300     139.128 127.825 208.076  1.00  0.00           H
ATOM   4853  HG3 GLU X 300     137.855 128.476 209.142  1.00  0.00           H
ATOM   4854  CD  GLU X 300     138.661 129.880 207.701  1.00  0.00           C
ATOM   4855  OE1 GLU X 300     137.609 130.071 207.044  1.00  0.00           O
ATOM   4856  OE2 GLU X 300     139.692 130.629 207.536  1.00  0.00           O
ATOM   4857  C   GLU X 300     137.889 129.986 211.299  1.00  0.00           C
ATOM   4858  O   GLU X 300     137.181 130.816 210.761  1.00  0.00           O
ATOM   4859  N   THR X 301     137.486 129.113 212.188  1.00  0.00           N
ATOM   4860  H   THR X 301     138.212 128.606 212.674  1.00  0.00           H
ATOM   4861  CA  THR X 301     136.039 128.825 212.432  1.00  0.00           C
ATOM   4862  HA  THR X 301     135.492 128.727 211.494  1.00  0.00           H
ATOM   4863  CB  THR X 301     135.728 127.530 213.287  1.00  0.00           C
ATOM   4864  HB  THR X 301     134.638 127.531 213.285  1.00  0.00           H
ATOM   4865  CG2 THR X 301     135.957 126.256 212.421  1.00  0.00           C
ATOM   4866 HG21 THR X 301     135.631 125.336 212.906  1.00  0.00           H
ATOM   4867 HG22 THR X 301     137.035 126.191 212.274  1.00  0.00           H
ATOM   4868 HG23 THR X 301     135.391 126.317 211.492  1.00  0.00           H
ATOM   4869  OG1 THR X 301     136.335 127.595 214.600  1.00  0.00           O
ATOM   4870  HG1 THR X 301     135.959 126.841 215.060  1.00  0.00           H
ATOM   4871  C   THR X 301     135.373 130.003 213.077  1.00  0.00           C
ATOM   4872  O   THR X 301     134.462 130.623 212.422  1.00  0.00           O
ATOM   4873  N   THR X 302     135.749 130.413 214.284  1.00  0.00           N
ATOM   4874  H   THR X 302     136.522 129.953 214.744  1.00  0.00           H
ATOM   4875  CA  THR X 302     135.231 131.582 215.047  1.00  0.00           C
ATOM   4876  HA  THR X 302     134.141 131.606 215.049  1.00  0.00           H
ATOM   4877  CB  THR X 302     135.620 131.498 216.567  1.00  0.00           C
ATOM   4878  HB  THR X 302     135.262 132.476 216.889  1.00  0.00           H
ATOM   4879  CG2 THR X 302     134.921 130.283 217.246  1.00  0.00           C
ATOM   4880 HG21 THR X 302     134.940 130.565 218.299  1.00  0.00           H
ATOM   4881 HG22 THR X 302     135.465 129.345 217.134  1.00  0.00           H
ATOM   4882 HG23 THR X 302     133.879 130.200 216.940  1.00  0.00           H
ATOM   4883  OG1 THR X 302     137.018 131.303 216.668  1.00  0.00           O
ATOM   4884  HG1 THR X 302     137.308 131.266 217.582  1.00  0.00           H
ATOM   4885  C   THR X 302     135.607 132.910 214.335  1.00  0.00           C
ATOM   4886  O   THR X 302     134.718 133.805 214.437  1.00  0.00           O
ATOM   4887  N   SER X 303     136.777 133.083 213.647  1.00  0.00           N
ATOM   4888  H   SER X 303     137.405 132.308 213.483  1.00  0.00           H
ATOM   4889  CA  SER X 303     137.142 134.334 212.968  1.00  0.00           C
ATOM   4890  HA  SER X 303     137.290 135.124 213.704  1.00  0.00           H
ATOM   4891  CB  SER X 303     138.640 134.208 212.461  1.00  0.00           C
ATOM   4892  HB2 SER X 303     139.002 135.127 211.999  1.00  0.00           H
ATOM   4893  HB3 SER X 303     139.197 133.961 213.365  1.00  0.00           H
ATOM   4894  OG  SER X 303     138.872 133.095 211.608  1.00  0.00           O
ATOM   4895  HG  SER X 303     139.669 132.582 211.757  1.00  0.00           H
ATOM   4896  C   SER X 303     136.290 134.698 211.833  1.00  0.00           C
ATOM   4897  O   SER X 303     135.799 135.810 211.764  1.00  0.00           O
ATOM   4898  N   THR X 304     135.930 133.681 211.034  1.00  0.00           N
ATOM   4899  H   THR X 304     136.344 132.790 211.266  1.00  0.00           H
ATOM   4900  CA  THR X 304     135.031 133.785 209.950  1.00  0.00           C
ATOM   4901  HA  THR X 304     135.370 134.609 209.324  1.00  0.00           H
ATOM   4902  CB  THR X 304     134.969 132.483 209.096  1.00  0.00           C
ATOM   4903  HB  THR X 304     134.559 131.647 209.663  1.00  0.00           H
ATOM   4904  CG2 THR X 304     134.000 132.720 207.934  1.00  0.00           C
ATOM   4905 HG21 THR X 304     133.713 131.768 207.489  1.00  0.00           H
ATOM   4906 HG22 THR X 304     134.481 133.484 207.322  1.00  0.00           H
ATOM   4907 HG23 THR X 304     133.061 133.075 208.359  1.00  0.00           H
ATOM   4908  OG1 THR X 304     136.238 132.329 208.578  1.00  0.00           O
ATOM   4909  HG1 THR X 304     136.765 131.857 209.227  1.00  0.00           H
ATOM   4910  C   THR X 304     133.612 134.146 210.440  1.00  0.00           C
ATOM   4911  O   THR X 304     132.963 135.067 209.997  1.00  0.00           O
ATOM   4912  N   THR X 305     133.219 133.556 211.526  1.00  0.00           N
ATOM   4913  H   THR X 305     133.724 132.788 211.945  1.00  0.00           H
ATOM   4914  CA  THR X 305     131.975 133.855 212.189  1.00  0.00           C
ATOM   4915  HA  THR X 305     131.233 133.748 211.398  1.00  0.00           H
ATOM   4916  CB  THR X 305     131.601 132.779 213.197  1.00  0.00           C
ATOM   4917  HB  THR X 305     132.300 132.721 214.031  1.00  0.00           H
ATOM   4918  CG2 THR X 305     130.147 132.967 213.632  1.00  0.00           C
ATOM   4919 HG21 THR X 305     129.838 132.199 214.342  1.00  0.00           H
ATOM   4920 HG22 THR X 305     129.555 132.902 212.719  1.00  0.00           H
ATOM   4921 HG23 THR X 305     130.112 133.941 214.118  1.00  0.00           H
ATOM   4922  OG1 THR X 305     131.542 131.470 212.600  1.00  0.00           O
ATOM   4923  HG1 THR X 305     132.399 131.038 212.634  1.00  0.00           H
ATOM   4924  C   THR X 305     131.864 135.213 212.782  1.00  0.00           C
ATOM   4925  O   THR X 305     130.826 135.841 212.689  1.00  0.00           O
ATOM   4926  N   LEU X 306     132.912 135.703 213.456  1.00  0.00           N
ATOM   4927  H   LEU X 306     133.800 135.234 213.343  1.00  0.00           H
ATOM   4928  CA  LEU X 306     133.051 137.088 213.975  1.00  0.00           C
ATOM   4929  HA  LEU X 306     132.229 137.349 214.641  1.00  0.00           H
ATOM   4930  CB  LEU X 306     134.398 137.295 214.755  1.00  0.00           C
ATOM   4931  HB2 LEU X 306     134.496 136.402 215.372  1.00  0.00           H
ATOM   4932  HB3 LEU X 306     135.304 137.255 214.150  1.00  0.00           H
ATOM   4933  CG  LEU X 306     134.457 138.472 215.745  1.00  0.00           C
ATOM   4934  HG  LEU X 306     134.349 139.401 215.185  1.00  0.00           H
ATOM   4935  CD1 LEU X 306     133.515 138.415 216.890  1.00  0.00           C
ATOM   4936 HD11 LEU X 306     132.505 138.121 216.606  1.00  0.00           H
ATOM   4937 HD12 LEU X 306     133.484 139.417 217.316  1.00  0.00           H
ATOM   4938 HD13 LEU X 306     133.905 137.730 217.644  1.00  0.00           H
ATOM   4939  CD2 LEU X 306     135.897 138.562 216.311  1.00  0.00           C
ATOM   4940 HD21 LEU X 306     136.125 137.748 216.999  1.00  0.00           H
ATOM   4941 HD22 LEU X 306     136.585 138.506 215.467  1.00  0.00           H
ATOM   4942 HD23 LEU X 306     135.955 139.535 216.798  1.00  0.00           H
ATOM   4943  C   LEU X 306     132.942 138.032 212.779  1.00  0.00           C
ATOM   4944  O   LEU X 306     132.180 139.013 212.928  1.00  0.00           O
ATOM   4945  N   ARG X 307     133.753 137.912 211.723  1.00  0.00           N
ATOM   4946  H   ARG X 307     134.342 137.095 211.650  1.00  0.00           H
ATOM   4947  CA  ARG X 307     133.646 138.806 210.532  1.00  0.00           C
ATOM   4948  HA  ARG X 307     133.803 139.810 210.926  1.00  0.00           H
ATOM   4949  CB  ARG X 307     134.617 138.505 209.385  1.00  0.00           C
ATOM   4950  HB2 ARG X 307     134.407 137.548 208.909  1.00  0.00           H
ATOM   4951  HB3 ARG X 307     134.512 139.208 208.559  1.00  0.00           H
ATOM   4952  CG  ARG X 307     136.083 138.632 209.911  1.00  0.00           C
ATOM   4953  HG2 ARG X 307     136.365 139.671 209.742  1.00  0.00           H
ATOM   4954  HG3 ARG X 307     136.281 138.321 210.936  1.00  0.00           H
ATOM   4955  CD  ARG X 307     137.085 137.732 209.112  1.00  0.00           C
ATOM   4956  HD2 ARG X 307     138.131 137.846 209.399  1.00  0.00           H
ATOM   4957  HD3 ARG X 307     136.902 136.704 209.424  1.00  0.00           H
ATOM   4958  NE  ARG X 307     136.831 137.803 207.650  1.00  0.00           N
ATOM   4959  HE  ARG X 307     136.555 138.724 207.341  1.00  0.00           H
ATOM   4960  CZ  ARG X 307     137.126 136.948 206.729  1.00  0.00           C
ATOM   4961  NH1 ARG X 307     136.863 137.245 205.506  1.00  0.00           N
ATOM   4962 HH11 ARG X 307     136.354 138.048 205.165  1.00  0.00           H
ATOM   4963 HH12 ARG X 307     137.017 136.592 204.751  1.00  0.00           H
ATOM   4964  NH2 ARG X 307     137.725 135.847 206.963  1.00  0.00           N
ATOM   4965 HH21 ARG X 307     137.825 135.594 207.936  1.00  0.00           H
ATOM   4966 HH22 ARG X 307     137.966 135.268 206.171  1.00  0.00           H
ATOM   4967  C   ARG X 307     132.174 138.763 209.993  1.00  0.00           C
ATOM   4968  O   ARG X 307     131.748 139.807 209.468  1.00  0.00           O
ATOM   4969  N   TYR X 308     131.407 137.613 210.127  1.00  0.00           N
ATOM   4970  H   TYR X 308     131.857 136.759 210.426  1.00  0.00           H
ATOM   4971  CA  TYR X 308     130.023 137.515 209.573  1.00  0.00           C
ATOM   4972  HA  TYR X 308     130.060 138.185 208.714  1.00  0.00           H
ATOM   4973  CB  TYR X 308     129.665 136.110 209.222  1.00  0.00           C
ATOM   4974  HB2 TYR X 308     130.278 135.302 209.621  1.00  0.00           H
ATOM   4975  HB3 TYR X 308     128.669 136.009 209.652  1.00  0.00           H
ATOM   4976  CG  TYR X 308     129.382 135.709 207.797  1.00  0.00           C
ATOM   4977  CD1 TYR X 308     129.917 134.530 207.285  1.00  0.00           C
ATOM   4978  HD1 TYR X 308     130.638 133.906 207.791  1.00  0.00           H
ATOM   4979  CE1 TYR X 308     129.511 134.161 205.966  1.00  0.00           C
ATOM   4980  HE1 TYR X 308     129.937 133.276 205.518  1.00  0.00           H
ATOM   4981  CZ  TYR X 308     128.586 134.941 205.242  1.00  0.00           C
ATOM   4982  OH  TYR X 308     128.252 134.522 204.033  1.00  0.00           O
ATOM   4983  HH  TYR X 308     127.582 135.117 203.689  1.00  0.00           H
ATOM   4984  CE2 TYR X 308     128.051 136.099 205.790  1.00  0.00           C
ATOM   4985  HE2 TYR X 308     127.293 136.631 205.233  1.00  0.00           H
ATOM   4986  CD2 TYR X 308     128.346 136.424 207.121  1.00  0.00           C
ATOM   4987  HD2 TYR X 308     127.807 137.148 207.715  1.00  0.00           H
ATOM   4988  C   TYR X 308     129.025 138.127 210.549  1.00  0.00           C
ATOM   4989  O   TYR X 308     128.200 138.907 210.048  1.00  0.00           O
ATOM   4990  N   ALA X 309     129.173 137.883 211.825  1.00  0.00           N
ATOM   4991  H   ALA X 309     129.719 137.066 212.057  1.00  0.00           H
ATOM   4992  CA  ALA X 309     128.470 138.674 212.854  1.00  0.00           C
ATOM   4993  HA  ALA X 309     127.412 138.415 212.832  1.00  0.00           H
ATOM   4994  CB  ALA X 309     129.024 138.338 214.248  1.00  0.00           C
ATOM   4995  HB1 ALA X 309     130.106 138.466 214.253  1.00  0.00           H
ATOM   4996  HB2 ALA X 309     128.793 137.286 214.410  1.00  0.00           H
ATOM   4997  HB3 ALA X 309     128.648 138.913 215.095  1.00  0.00           H
ATOM   4998  C   ALA X 309     128.564 140.188 212.618  1.00  0.00           C
ATOM   4999  O   ALA X 309     127.602 140.906 212.517  1.00  0.00           O
ATOM   5000  N   LEU X 310     129.794 140.746 212.577  1.00  0.00           N
ATOM   5001  H   LEU X 310     130.579 140.156 212.815  1.00  0.00           H
ATOM   5002  CA  LEU X 310     130.056 142.184 212.479  1.00  0.00           C
ATOM   5003  HA  LEU X 310     129.460 142.747 213.197  1.00  0.00           H
ATOM   5004  CB  LEU X 310     131.533 142.430 212.622  1.00  0.00           C
ATOM   5005  HB2 LEU X 310     132.223 141.867 211.994  1.00  0.00           H
ATOM   5006  HB3 LEU X 310     131.626 143.487 212.371  1.00  0.00           H
ATOM   5007  CG  LEU X 310     131.950 142.257 214.110  1.00  0.00           C
ATOM   5008  HG  LEU X 310     131.438 141.374 214.495  1.00  0.00           H
ATOM   5009  CD1 LEU X 310     133.410 141.993 214.183  1.00  0.00           C
ATOM   5010 HD11 LEU X 310     133.645 141.913 215.244  1.00  0.00           H
ATOM   5011 HD12 LEU X 310     133.996 142.793 213.732  1.00  0.00           H
ATOM   5012 HD13 LEU X 310     133.642 141.078 213.637  1.00  0.00           H
ATOM   5013  CD2 LEU X 310     131.583 143.398 215.061  1.00  0.00           C
ATOM   5014 HD21 LEU X 310     131.877 143.112 216.071  1.00  0.00           H
ATOM   5015 HD22 LEU X 310     132.084 144.294 214.694  1.00  0.00           H
ATOM   5016 HD23 LEU X 310     130.504 143.542 215.116  1.00  0.00           H
ATOM   5017  C   LEU X 310     129.530 142.666 211.148  1.00  0.00           C
ATOM   5018  O   LEU X 310     128.864 143.719 211.111  1.00  0.00           O
ATOM   5019  N   LEU X 311     129.691 141.902 210.059  1.00  0.00           N
ATOM   5020  H   LEU X 311     130.450 141.236 210.081  1.00  0.00           H
ATOM   5021  CA  LEU X 311     129.059 142.178 208.744  1.00  0.00           C
ATOM   5022  HA  LEU X 311     129.404 143.152 208.399  1.00  0.00           H
ATOM   5023  CB  LEU X 311     129.608 141.042 207.834  1.00  0.00           C
ATOM   5024  HB2 LEU X 311     130.684 141.148 207.694  1.00  0.00           H
ATOM   5025  HB3 LEU X 311     129.492 140.080 208.334  1.00  0.00           H
ATOM   5026  CG  LEU X 311     128.940 141.118 206.456  1.00  0.00           C
ATOM   5027  HG  LEU X 311     127.883 140.873 206.564  1.00  0.00           H
ATOM   5028  CD1 LEU X 311     129.079 142.405 205.690  1.00  0.00           C
ATOM   5029 HD11 LEU X 311     128.335 143.135 206.010  1.00  0.00           H
ATOM   5030 HD12 LEU X 311     128.948 142.224 204.623  1.00  0.00           H
ATOM   5031 HD13 LEU X 311     130.021 142.917 205.887  1.00  0.00           H
ATOM   5032  CD2 LEU X 311     129.389 139.968 205.588  1.00  0.00           C
ATOM   5033 HD21 LEU X 311     129.250 138.985 206.038  1.00  0.00           H
ATOM   5034 HD22 LEU X 311     128.799 140.064 204.676  1.00  0.00           H
ATOM   5035 HD23 LEU X 311     130.436 140.122 205.330  1.00  0.00           H
ATOM   5036  C   LEU X 311     127.495 142.337 208.791  1.00  0.00           C
ATOM   5037  O   LEU X 311     126.942 143.329 208.517  1.00  0.00           O
ATOM   5038  N   LEU X 312     126.816 141.275 209.330  1.00  0.00           N
ATOM   5039  H   LEU X 312     127.393 140.534 209.702  1.00  0.00           H
ATOM   5040  CA  LEU X 312     125.440 141.280 209.707  1.00  0.00           C
ATOM   5041  HA  LEU X 312     124.943 141.532 208.770  1.00  0.00           H
ATOM   5042  CB  LEU X 312     125.049 139.870 210.259  1.00  0.00           C
ATOM   5043  HB2 LEU X 312     125.825 139.420 210.878  1.00  0.00           H
ATOM   5044  HB3 LEU X 312     124.099 139.933 210.789  1.00  0.00           H
ATOM   5045  CG  LEU X 312     124.936 138.900 209.081  1.00  0.00           C
ATOM   5046  HG  LEU X 312     125.726 139.077 208.351  1.00  0.00           H
ATOM   5047  CD1 LEU X 312     125.075 137.463 209.457  1.00  0.00           C
ATOM   5048 HD11 LEU X 312     124.194 137.165 210.025  1.00  0.00           H
ATOM   5049 HD12 LEU X 312     125.977 137.289 210.043  1.00  0.00           H
ATOM   5050 HD13 LEU X 312     125.259 136.837 208.584  1.00  0.00           H
ATOM   5051  CD2 LEU X 312     123.581 139.040 208.355  1.00  0.00           C
ATOM   5052 HD21 LEU X 312     123.465 140.034 207.923  1.00  0.00           H
ATOM   5053 HD22 LEU X 312     123.700 138.432 207.458  1.00  0.00           H
ATOM   5054 HD23 LEU X 312     122.744 138.782 209.005  1.00  0.00           H
ATOM   5055  C   LEU X 312     125.027 142.438 210.617  1.00  0.00           C
ATOM   5056  O   LEU X 312     123.971 143.065 210.341  1.00  0.00           O
ATOM   5057  N   LEU X 313     125.844 142.901 211.611  1.00  0.00           N
ATOM   5058  H   LEU X 313     126.638 142.346 211.898  1.00  0.00           H
ATOM   5059  CA  LEU X 313     125.522 144.120 212.396  1.00  0.00           C
ATOM   5060  HA  LEU X 313     124.461 144.062 212.643  1.00  0.00           H
ATOM   5061  CB  LEU X 313     126.225 144.049 213.724  1.00  0.00           C
ATOM   5062  HB2 LEU X 313     127.263 143.834 213.467  1.00  0.00           H
[truncated: 6,522,324 more chars]
