# Supplementary material for: Differing Membrane Interactions of Two Highly Similar Drug-Metabolizing Cytochrome P450 Isoforms: CYP 2C9 and CYP 2C19
Source: Int J Mol Sci. 2019 Sep 4;20(18):4328. doi: 10.3390/ijms20184328 (PMC6770661; doi:10.3390/ijms20184328)
Supplement: Supplementary file 1 [file ijms-20-04328-s001.zip › CYP_2C9_2C19_pdb/2C19_SIM3_final_noW.pdb]

CRYST1  133.541  149.153  166.535  90.00  90.00  90.00 P 1           1
ATOM      1  N   MET X   1     134.792 141.679 157.397  1.00  0.00           N
ATOM      2  H1  MET X   1     134.494 141.514 156.447  1.00  0.00           H
ATOM      3  H2  MET X   1     135.112 142.637 157.388  1.00  0.00           H
ATOM      4  H3  MET X   1     135.509 140.969 157.358  1.00  0.00           H
ATOM      5  CA  MET X   1     133.850 141.526 158.499  1.00  0.00           C
ATOM      6  HA  MET X   1     133.467 140.509 158.576  1.00  0.00           H
ATOM      7  CB  MET X   1     134.559 141.897 159.811  1.00  0.00           C
ATOM      8  HB2 MET X   1     135.529 141.409 159.713  1.00  0.00           H
ATOM      9  HB3 MET X   1     134.743 142.966 159.920  1.00  0.00           H
ATOM     10  CG  MET X   1     133.788 141.295 160.956  1.00  0.00           C
ATOM     11  HG2 MET X   1     132.765 141.668 160.900  1.00  0.00           H
ATOM     12  HG3 MET X   1     133.693 140.240 160.699  1.00  0.00           H
ATOM     13  SD  MET X   1     134.493 141.490 162.625  1.00  0.00           S
ATOM     14  CE  MET X   1     135.970 140.478 162.515  1.00  0.00           C
ATOM     15  HE1 MET X   1     136.647 140.689 161.687  1.00  0.00           H
ATOM     16  HE2 MET X   1     136.567 140.558 163.423  1.00  0.00           H
ATOM     17  HE3 MET X   1     135.623 139.452 162.396  1.00  0.00           H
ATOM     18  C   MET X   1     132.626 142.415 158.309  1.00  0.00           C
ATOM     19  O   MET X   1     132.641 143.464 157.744  1.00  0.00           O
ATOM     20  N   ASP X   2     131.435 141.901 158.612  1.00  0.00           N
ATOM     21  H   ASP X   2     131.393 140.964 158.988  1.00  0.00           H
ATOM     22  CA  ASP X   2     130.125 142.667 158.550  1.00  0.00           C
ATOM     23  HA  ASP X   2     129.998 143.069 157.544  1.00  0.00           H
ATOM     24  CB  ASP X   2     128.955 141.706 158.788  1.00  0.00           C
ATOM     25  HB2 ASP X   2     129.064 140.938 158.022  1.00  0.00           H
ATOM     26  HB3 ASP X   2     129.069 141.186 159.739  1.00  0.00           H
ATOM     27  CG  ASP X   2     127.642 142.428 158.603  1.00  0.00           C
ATOM     28  OD1 ASP X   2     127.013 142.167 157.530  1.00  0.00           O
ATOM     29  OD2 ASP X   2     127.128 143.143 159.486  1.00  0.00           O
ATOM     30  C   ASP X   2     130.142 143.818 159.613  1.00  0.00           C
ATOM     31  O   ASP X   2     130.493 143.551 160.772  1.00  0.00           O
ATOM     32  N   PRO X   3     129.854 145.018 159.233  1.00  0.00           N
ATOM     33  CD  PRO X   3     129.747 145.559 157.846  1.00  0.00           C
ATOM     34  HD2 PRO X   3     128.705 145.350 157.606  1.00  0.00           H
ATOM     35  HD3 PRO X   3     130.455 145.085 157.165  1.00  0.00           H
ATOM     36  CG  PRO X   3     129.845 147.125 157.988  1.00  0.00           C
ATOM     37  HG2 PRO X   3     129.276 147.566 157.170  1.00  0.00           H
ATOM     38  HG3 PRO X   3     130.831 147.589 157.989  1.00  0.00           H
ATOM     39  CB  PRO X   3     129.052 147.347 159.247  1.00  0.00           C
ATOM     40  HB2 PRO X   3     127.972 147.241 159.137  1.00  0.00           H
ATOM     41  HB3 PRO X   3     129.220 148.338 159.669  1.00  0.00           H
ATOM     42  CA  PRO X   3     129.644 146.164 160.094  1.00  0.00           C
ATOM     43  HA  PRO X   3     130.677 146.475 160.251  1.00  0.00           H
ATOM     44  C   PRO X   3     129.010 145.993 161.481  1.00  0.00           C
ATOM     45  O   PRO X   3     129.495 146.514 162.482  1.00  0.00           O
ATOM     46  N   PHE X   4     127.902 145.240 161.598  1.00  0.00           N
ATOM     47  H   PHE X   4     127.537 144.816 160.757  1.00  0.00           H
ATOM     48  CA  PHE X   4     127.173 144.991 162.875  1.00  0.00           C
ATOM     49  HA  PHE X   4     127.154 145.958 163.377  1.00  0.00           H
ATOM     50  CB  PHE X   4     125.727 144.485 162.544  1.00  0.00           C
ATOM     51  HB2 PHE X   4     125.354 145.133 161.751  1.00  0.00           H
ATOM     52  HB3 PHE X   4     125.778 143.551 161.985  1.00  0.00           H
ATOM     53  CG  PHE X   4     124.747 144.385 163.676  1.00  0.00           C
ATOM     54  CD1 PHE X   4     124.293 143.131 163.957  1.00  0.00           C
ATOM     55  HD1 PHE X   4     124.591 142.319 163.309  1.00  0.00           H
ATOM     56  CE1 PHE X   4     123.425 142.971 165.029  1.00  0.00           C
ATOM     57  HE1 PHE X   4     123.046 141.980 165.230  1.00  0.00           H
ATOM     58  CZ  PHE X   4     123.018 144.057 165.756  1.00  0.00           C
ATOM     59  HZ  PHE X   4     122.299 143.905 166.548  1.00  0.00           H
ATOM     60  CE2 PHE X   4     123.503 145.364 165.550  1.00  0.00           C
ATOM     61  HE2 PHE X   4     123.289 146.122 166.289  1.00  0.00           H
ATOM     62  CD2 PHE X   4     124.367 145.555 164.472  1.00  0.00           C
ATOM     63  HD2 PHE X   4     124.688 146.572 164.299  1.00  0.00           H
ATOM     64  C   PHE X   4     127.888 143.951 163.783  1.00  0.00           C
ATOM     65  O   PHE X   4     128.004 144.164 165.009  1.00  0.00           O
ATOM     66  N   VAL X   5     128.520 142.896 163.195  1.00  0.00           N
ATOM     67  H   VAL X   5     128.436 142.823 162.191  1.00  0.00           H
ATOM     68  CA  VAL X   5     129.524 142.063 163.830  1.00  0.00           C
ATOM     69  HA  VAL X   5     129.075 141.624 164.721  1.00  0.00           H
ATOM     70  CB  VAL X   5     130.025 140.902 162.937  1.00  0.00           C
ATOM     71  HB  VAL X   5     130.541 141.371 162.100  1.00  0.00           H
ATOM     72  CG1 VAL X   5     130.972 139.949 163.765  1.00  0.00           C
ATOM     73 HG11 VAL X   5     130.405 139.644 164.645  1.00  0.00           H
ATOM     74 HG12 VAL X   5     131.332 139.120 163.156  1.00  0.00           H
ATOM     75 HG13 VAL X   5     131.889 140.404 164.140  1.00  0.00           H
ATOM     76  CG2 VAL X   5     128.970 140.078 162.350  1.00  0.00           C
ATOM     77 HG21 VAL X   5     128.336 139.616 163.106  1.00  0.00           H
ATOM     78 HG22 VAL X   5     129.365 139.282 161.719  1.00  0.00           H
ATOM     79 HG23 VAL X   5     128.383 140.694 161.668  1.00  0.00           H
ATOM     80  C   VAL X   5     130.703 142.863 164.306  1.00  0.00           C
ATOM     81  O   VAL X   5     131.145 142.812 165.437  1.00  0.00           O
ATOM     82  N   VAL X   6     131.348 143.691 163.436  1.00  0.00           N
ATOM     83  H   VAL X   6     131.078 143.672 162.462  1.00  0.00           H
ATOM     84  CA  VAL X   6     132.374 144.665 163.893  1.00  0.00           C
ATOM     85  HA  VAL X   6     133.238 144.066 164.181  1.00  0.00           H
ATOM     86  CB  VAL X   6     132.836 145.597 162.748  1.00  0.00           C
ATOM     87  HB  VAL X   6     131.955 146.138 162.403  1.00  0.00           H
ATOM     88  CG1 VAL X   6     134.004 146.454 163.314  1.00  0.00           C
ATOM     89 HG11 VAL X   6     134.746 146.704 162.555  1.00  0.00           H
ATOM     90 HG12 VAL X   6     133.536 147.384 163.639  1.00  0.00           H
ATOM     91 HG13 VAL X   6     134.511 145.890 164.096  1.00  0.00           H
ATOM     92  CG2 VAL X   6     133.550 144.812 161.610  1.00  0.00           C
ATOM     93 HG21 VAL X   6     134.429 144.228 161.882  1.00  0.00           H
ATOM     94 HG22 VAL X   6     133.760 145.499 160.790  1.00  0.00           H
ATOM     95 HG23 VAL X   6     132.766 144.147 161.248  1.00  0.00           H
ATOM     96  C   VAL X   6     131.979 145.503 165.016  1.00  0.00           C
ATOM     97  O   VAL X   6     132.806 145.518 165.958  1.00  0.00           O
ATOM     98  N   LEU X   7     130.776 146.066 165.080  1.00  0.00           N
ATOM     99  H   LEU X   7     130.187 146.112 164.261  1.00  0.00           H
ATOM    100  CA  LEU X   7     130.332 146.901 166.178  1.00  0.00           C
ATOM    101  HA  LEU X   7     131.133 147.602 166.411  1.00  0.00           H
ATOM    102  CB  LEU X   7     128.969 147.586 165.639  1.00  0.00           C
ATOM    103  HB2 LEU X   7     129.056 148.117 164.690  1.00  0.00           H
ATOM    104  HB3 LEU X   7     128.294 146.748 165.468  1.00  0.00           H
ATOM    105  CG  LEU X   7     128.270 148.480 166.656  1.00  0.00           C
ATOM    106  HG  LEU X   7     128.227 147.841 167.538  1.00  0.00           H
ATOM    107  CD1 LEU X   7     129.109 149.684 167.043  1.00  0.00           C
ATOM    108 HD11 LEU X   7     129.271 150.449 166.283  1.00  0.00           H
ATOM    109 HD12 LEU X   7     130.030 149.275 167.457  1.00  0.00           H
ATOM    110 HD13 LEU X   7     128.533 150.149 167.844  1.00  0.00           H
ATOM    111  CD2 LEU X   7     126.855 148.873 166.357  1.00  0.00           C
ATOM    112 HD21 LEU X   7     126.228 147.994 166.213  1.00  0.00           H
ATOM    113 HD22 LEU X   7     126.420 149.405 167.204  1.00  0.00           H
ATOM    114 HD23 LEU X   7     126.762 149.540 165.500  1.00  0.00           H
ATOM    115  C   LEU X   7     130.110 146.098 167.408  1.00  0.00           C
ATOM    116  O   LEU X   7     130.537 146.465 168.496  1.00  0.00           O
ATOM    117  N   VAL X   8     129.343 144.968 167.348  1.00  0.00           N
ATOM    118  H   VAL X   8     128.891 144.720 166.479  1.00  0.00           H
ATOM    119  CA  VAL X   8     128.968 144.145 168.498  1.00  0.00           C
ATOM    120  HA  VAL X   8     128.666 144.898 169.226  1.00  0.00           H
ATOM    121  CB  VAL X   8     127.720 143.321 168.148  1.00  0.00           C
ATOM    122  HB  VAL X   8     127.924 142.792 167.217  1.00  0.00           H
ATOM    123  CG1 VAL X   8     127.392 142.257 169.209  1.00  0.00           C
ATOM    124 HG11 VAL X   8     127.415 142.554 170.258  1.00  0.00           H
ATOM    125 HG12 VAL X   8     126.386 141.904 168.983  1.00  0.00           H
ATOM    126 HG13 VAL X   8     128.078 141.410 169.191  1.00  0.00           H
ATOM    127  CG2 VAL X   8     126.557 144.204 167.850  1.00  0.00           C
ATOM    128 HG21 VAL X   8     126.807 144.813 166.981  1.00  0.00           H
ATOM    129 HG22 VAL X   8     126.271 144.803 168.716  1.00  0.00           H
ATOM    130 HG23 VAL X   8     125.668 143.625 167.602  1.00  0.00           H
ATOM    131  C   VAL X   8     130.199 143.432 169.099  1.00  0.00           C
ATOM    132  O   VAL X   8     130.207 143.163 170.291  1.00  0.00           O
ATOM    133  N   LEU X   9     131.346 143.286 168.346  1.00  0.00           N
ATOM    134  H   LEU X   9     131.095 143.359 167.371  1.00  0.00           H
ATOM    135  CA  LEU X   9     132.599 142.930 168.930  1.00  0.00           C
ATOM    136  HA  LEU X   9     132.430 142.064 169.571  1.00  0.00           H
ATOM    137  CB  LEU X   9     133.587 142.467 167.821  1.00  0.00           C
ATOM    138  HB2 LEU X   9     133.396 143.010 166.896  1.00  0.00           H
ATOM    139  HB3 LEU X   9     134.634 142.482 168.126  1.00  0.00           H
ATOM    140  CG  LEU X   9     133.204 141.043 167.419  1.00  0.00           C
ATOM    141  HG  LEU X   9     132.128 140.871 167.466  1.00  0.00           H
ATOM    142  CD1 LEU X   9     133.751 140.749 166.004  1.00  0.00           C
ATOM    143 HD11 LEU X   9     134.831 140.897 166.003  1.00  0.00           H
ATOM    144 HD12 LEU X   9     133.367 141.474 165.287  1.00  0.00           H
ATOM    145 HD13 LEU X   9     133.530 139.732 165.681  1.00  0.00           H
ATOM    146  CD2 LEU X   9     133.843 139.935 168.361  1.00  0.00           C
ATOM    147 HD21 LEU X   9     133.766 138.987 167.828  1.00  0.00           H
ATOM    148 HD22 LEU X   9     134.888 140.220 168.478  1.00  0.00           H
ATOM    149 HD23 LEU X   9     133.309 139.860 169.308  1.00  0.00           H
ATOM    150  C   LEU X   9     133.212 144.086 169.713  1.00  0.00           C
ATOM    151  O   LEU X   9     133.453 143.943 170.924  1.00  0.00           O
ATOM    152  N   CYS X  10     133.355 145.239 169.089  1.00  0.00           N
ATOM    153  H   CYS X  10     133.165 145.336 168.102  1.00  0.00           H
ATOM    154  CA  CYS X  10     133.875 146.482 169.698  1.00  0.00           C
ATOM    155  HA  CYS X  10     134.886 146.271 170.046  1.00  0.00           H
ATOM    156  CB  CYS X  10     133.692 147.748 168.818  1.00  0.00           C
ATOM    157  HB2 CYS X  10     132.634 147.850 168.578  1.00  0.00           H
ATOM    158  HB3 CYS X  10     134.029 148.611 169.392  1.00  0.00           H
ATOM    159  SG  CYS X  10     134.616 147.684 167.209  1.00  0.00           S
ATOM    160  HG  CYS X  10     133.936 146.625 166.760  1.00  0.00           H
ATOM    161  C   CYS X  10     133.135 146.775 171.031  1.00  0.00           C
ATOM    162  O   CYS X  10     133.775 147.007 172.039  1.00  0.00           O
ATOM    163  N   LEU X  11     131.819 146.616 170.961  1.00  0.00           N
ATOM    164  H   LEU X  11     131.394 146.211 170.138  1.00  0.00           H
ATOM    165  CA  LEU X  11     130.952 146.898 172.176  1.00  0.00           C
ATOM    166  HA  LEU X  11     131.364 147.795 172.638  1.00  0.00           H
ATOM    167  CB  LEU X  11     129.501 147.098 171.791  1.00  0.00           C
ATOM    168  HB2 LEU X  11     129.182 146.227 171.219  1.00  0.00           H
ATOM    169  HB3 LEU X  11     128.997 147.094 172.758  1.00  0.00           H
ATOM    170  CG  LEU X  11     129.220 148.416 170.993  1.00  0.00           C
ATOM    171  HG  LEU X  11     129.619 148.389 169.979  1.00  0.00           H
ATOM    172  CD1 LEU X  11     127.732 148.365 170.687  1.00  0.00           C
ATOM    173 HD11 LEU X  11     127.640 147.414 170.162  1.00  0.00           H
ATOM    174 HD12 LEU X  11     127.325 149.105 169.998  1.00  0.00           H
ATOM    175 HD13 LEU X  11     127.077 148.291 171.555  1.00  0.00           H
ATOM    176  CD2 LEU X  11     129.663 149.672 171.765  1.00  0.00           C
ATOM    177 HD21 LEU X  11     129.274 149.748 172.780  1.00  0.00           H
ATOM    178 HD22 LEU X  11     130.734 149.858 171.842  1.00  0.00           H
ATOM    179 HD23 LEU X  11     129.150 150.476 171.238  1.00  0.00           H
ATOM    180  C   LEU X  11     131.017 145.773 173.239  1.00  0.00           C
ATOM    181  O   LEU X  11     130.937 146.018 174.412  1.00  0.00           O
ATOM    182  N   SER X  12     131.107 144.515 172.761  1.00  0.00           N
ATOM    183  H   SER X  12     131.050 144.331 171.769  1.00  0.00           H
ATOM    184  CA  SER X  12     131.612 143.394 173.545  1.00  0.00           C
ATOM    185  HA  SER X  12     130.916 143.080 174.322  1.00  0.00           H
ATOM    186  CB  SER X  12     131.765 141.989 172.872  1.00  0.00           C
ATOM    187  HB2 SER X  12     132.570 142.107 172.147  1.00  0.00           H
ATOM    188  HB3 SER X  12     131.970 141.138 173.522  1.00  0.00           H
ATOM    189  OG  SER X  12     130.626 141.503 172.126  1.00  0.00           O
ATOM    190  HG  SER X  12     130.488 142.053 171.352  1.00  0.00           H
ATOM    191  C   SER X  12     132.861 143.602 174.342  1.00  0.00           C
ATOM    192  O   SER X  12     132.998 143.184 175.505  1.00  0.00           O
ATOM    193  N   CYS X  13     133.826 144.370 173.809  1.00  0.00           N
ATOM    194  H   CYS X  13     133.629 144.596 172.844  1.00  0.00           H
ATOM    195  CA  CYS X  13     135.059 144.771 174.454  1.00  0.00           C
ATOM    196  HA  CYS X  13     135.475 143.851 174.864  1.00  0.00           H
ATOM    197  CB  CYS X  13     136.043 145.253 173.364  1.00  0.00           C
ATOM    198  HB2 CYS X  13     135.529 146.004 172.765  1.00  0.00           H
ATOM    199  HB3 CYS X  13     136.995 145.528 173.819  1.00  0.00           H
ATOM    200  SG  CYS X  13     136.326 143.991 172.125  1.00  0.00           S
ATOM    201  HG  CYS X  13     135.325 144.213 171.268  1.00  0.00           H
ATOM    202  C   CYS X  13     134.782 145.719 175.616  1.00  0.00           C
ATOM    203  O   CYS X  13     135.313 145.481 176.728  1.00  0.00           O
ATOM    204  N   LEU X  14     133.855 146.666 175.505  1.00  0.00           N
ATOM    205  H   LEU X  14     133.421 146.816 174.606  1.00  0.00           H
ATOM    206  CA  LEU X  14     133.457 147.589 176.632  1.00  0.00           C
ATOM    207  HA  LEU X  14     134.412 147.835 177.095  1.00  0.00           H
ATOM    208  CB  LEU X  14     132.694 148.797 176.053  1.00  0.00           C
ATOM    209  HB2 LEU X  14     131.836 148.262 175.644  1.00  0.00           H
ATOM    210  HB3 LEU X  14     132.354 149.411 176.888  1.00  0.00           H
ATOM    211  CG  LEU X  14     133.431 149.653 174.971  1.00  0.00           C
ATOM    212  HG  LEU X  14     133.709 149.036 174.117  1.00  0.00           H
ATOM    213  CD1 LEU X  14     132.535 150.831 174.582  1.00  0.00           C
ATOM    214 HD11 LEU X  14     132.296 151.350 175.511  1.00  0.00           H
ATOM    215 HD12 LEU X  14     131.621 150.481 174.103  1.00  0.00           H
ATOM    216 HD13 LEU X  14     133.053 151.465 173.863  1.00  0.00           H
ATOM    217  CD2 LEU X  14     134.660 150.180 175.622  1.00  0.00           C
ATOM    218 HD21 LEU X  14     134.346 150.856 176.417  1.00  0.00           H
ATOM    219 HD22 LEU X  14     135.380 149.410 175.898  1.00  0.00           H
ATOM    220 HD23 LEU X  14     135.097 150.782 174.825  1.00  0.00           H
ATOM    221  C   LEU X  14     132.543 146.828 177.659  1.00  0.00           C
ATOM    222  O   LEU X  14     132.654 147.170 178.804  1.00  0.00           O
ATOM    223  N   LEU X  15     131.728 145.871 177.274  1.00  0.00           N
ATOM    224  H   LEU X  15     131.741 145.610 176.298  1.00  0.00           H
ATOM    225  CA  LEU X  15     130.907 145.132 178.215  1.00  0.00           C
ATOM    226  HA  LEU X  15     130.326 145.945 178.651  1.00  0.00           H
ATOM    227  CB  LEU X  15     129.913 144.150 177.473  1.00  0.00           C
ATOM    228  HB2 LEU X  15     129.210 144.814 176.971  1.00  0.00           H
ATOM    229  HB3 LEU X  15     130.532 143.643 176.732  1.00  0.00           H
ATOM    230  CG  LEU X  15     129.146 143.072 178.217  1.00  0.00           C
ATOM    231  HG  LEU X  15     129.845 142.430 178.754  1.00  0.00           H
ATOM    232  CD1 LEU X  15     128.290 143.584 179.462  1.00  0.00           C
ATOM    233 HD11 LEU X  15     127.954 142.708 180.016  1.00  0.00           H
ATOM    234 HD12 LEU X  15     127.413 144.136 179.124  1.00  0.00           H
ATOM    235 HD13 LEU X  15     128.826 144.215 180.170  1.00  0.00           H
ATOM    236  CD2 LEU X  15     128.252 142.209 177.334  1.00  0.00           C
ATOM    237 HD21 LEU X  15     128.752 141.769 176.471  1.00  0.00           H
ATOM    238 HD22 LEU X  15     127.835 141.430 177.973  1.00  0.00           H
ATOM    239 HD23 LEU X  15     127.551 142.909 176.879  1.00  0.00           H
ATOM    240  C   LEU X  15     131.850 144.288 179.169  1.00  0.00           C
ATOM    241  O   LEU X  15     131.659 144.340 180.354  1.00  0.00           O
ATOM    242  N   LEU X  16     132.820 143.469 178.654  1.00  0.00           N
ATOM    243  H   LEU X  16     132.779 143.310 177.657  1.00  0.00           H
ATOM    244  CA  LEU X  16     133.858 142.842 179.460  1.00  0.00           C
ATOM    245  HA  LEU X  16     133.502 141.942 179.963  1.00  0.00           H
ATOM    246  CB  LEU X  16     135.028 142.413 178.555  1.00  0.00           C
ATOM    247  HB2 LEU X  16     134.957 143.014 177.649  1.00  0.00           H
ATOM    248  HB3 LEU X  16     136.004 142.574 179.014  1.00  0.00           H
ATOM    249  CG  LEU X  16     135.175 140.914 178.197  1.00  0.00           C
ATOM    250  HG  LEU X  16     135.165 140.289 179.091  1.00  0.00           H
ATOM    251  CD1 LEU X  16     133.994 140.548 177.322  1.00  0.00           C
ATOM    252 HD11 LEU X  16     134.083 139.477 177.140  1.00  0.00           H
ATOM    253 HD12 LEU X  16     134.142 141.036 176.358  1.00  0.00           H
ATOM    254 HD13 LEU X  16     133.054 140.735 177.841  1.00  0.00           H
ATOM    255  CD2 LEU X  16     136.421 140.538 177.402  1.00  0.00           C
ATOM    256 HD21 LEU X  16     136.455 141.198 176.536  1.00  0.00           H
ATOM    257 HD22 LEU X  16     137.290 140.716 178.036  1.00  0.00           H
ATOM    258 HD23 LEU X  16     136.392 139.517 177.023  1.00  0.00           H
ATOM    259  C   LEU X  16     134.502 143.860 180.467  1.00  0.00           C
ATOM    260  O   LEU X  16     134.777 143.471 181.608  1.00  0.00           O
ATOM    261  N   LEU X  17     134.851 145.077 180.078  1.00  0.00           N
ATOM    262  H   LEU X  17     134.886 145.285 179.090  1.00  0.00           H
ATOM    263  CA  LEU X  17     135.495 146.030 181.053  1.00  0.00           C
ATOM    264  HA  LEU X  17     136.271 145.387 181.469  1.00  0.00           H
ATOM    265  CB  LEU X  17     136.083 147.184 180.188  1.00  0.00           C
ATOM    266  HB2 LEU X  17     135.311 147.465 179.472  1.00  0.00           H
ATOM    267  HB3 LEU X  17     136.412 148.062 180.744  1.00  0.00           H
ATOM    268  CG  LEU X  17     137.291 146.661 179.348  1.00  0.00           C
ATOM    269  HG  LEU X  17     136.983 145.969 178.564  1.00  0.00           H
ATOM    270  CD1 LEU X  17     137.710 147.930 178.621  1.00  0.00           C
ATOM    271 HD11 LEU X  17     138.156 148.596 179.359  1.00  0.00           H
ATOM    272 HD12 LEU X  17     136.901 148.447 178.104  1.00  0.00           H
ATOM    273 HD13 LEU X  17     138.434 147.656 177.854  1.00  0.00           H
ATOM    274  CD2 LEU X  17     138.414 146.112 180.219  1.00  0.00           C
ATOM    275 HD21 LEU X  17     139.308 145.854 179.651  1.00  0.00           H
ATOM    276 HD22 LEU X  17     138.690 146.741 181.065  1.00  0.00           H
ATOM    277 HD23 LEU X  17     138.037 145.145 180.552  1.00  0.00           H
ATOM    278  C   LEU X  17     134.481 146.611 182.085  1.00  0.00           C
ATOM    279  O   LEU X  17     134.758 146.727 183.299  1.00  0.00           O
ATOM    280  N   SER X  18     133.168 146.778 181.719  1.00  0.00           N
ATOM    281  H   SER X  18     132.985 146.521 180.759  1.00  0.00           H
ATOM    282  CA  SER X  18     132.001 147.071 182.603  1.00  0.00           C
ATOM    283  HA  SER X  18     132.066 148.053 183.070  1.00  0.00           H
ATOM    284  CB  SER X  18     130.739 147.322 181.756  1.00  0.00           C
ATOM    285  HB2 SER X  18     130.588 146.499 181.058  1.00  0.00           H
ATOM    286  HB3 SER X  18     129.897 147.387 182.444  1.00  0.00           H
ATOM    287  OG  SER X  18     131.016 148.451 181.016  1.00  0.00           O
ATOM    288  HG  SER X  18     131.708 148.396 180.353  1.00  0.00           H
ATOM    289  C   SER X  18     131.767 146.013 183.672  1.00  0.00           C
ATOM    290  O   SER X  18     131.462 146.334 184.825  1.00  0.00           O
ATOM    291  N   ILE X  19     132.013 144.756 183.238  1.00  0.00           N
ATOM    292  H   ILE X  19     132.072 144.542 182.252  1.00  0.00           H
ATOM    293  CA  ILE X  19     131.926 143.585 184.173  1.00  0.00           C
ATOM    294  HA  ILE X  19     131.171 143.704 184.950  1.00  0.00           H
ATOM    295  CB  ILE X  19     131.659 142.290 183.357  1.00  0.00           C
ATOM    296  HB  ILE X  19     132.504 142.062 182.706  1.00  0.00           H
ATOM    297  CG2 ILE X  19     131.436 141.097 184.416  1.00  0.00           C
ATOM    298 HG21 ILE X  19     130.545 141.393 184.970  1.00  0.00           H
ATOM    299 HG22 ILE X  19     132.284 140.982 185.091  1.00  0.00           H
ATOM    300 HG23 ILE X  19     131.227 140.130 183.956  1.00  0.00           H
ATOM    301  CG1 ILE X  19     130.349 142.296 182.578  1.00  0.00           C
ATOM    302 HG12 ILE X  19     129.554 141.872 183.191  1.00  0.00           H
ATOM    303 HG13 ILE X  19     130.027 143.272 182.214  1.00  0.00           H
ATOM    304  CD1 ILE X  19     130.480 141.374 181.331  1.00  0.00           C
ATOM    305 HD11 ILE X  19     131.306 141.804 180.765  1.00  0.00           H
ATOM    306 HD12 ILE X  19     129.573 141.479 180.735  1.00  0.00           H
ATOM    307 HD13 ILE X  19     130.568 140.320 181.593  1.00  0.00           H
ATOM    308  C   ILE X  19     133.256 143.470 185.070  1.00  0.00           C
ATOM    309  O   ILE X  19     133.084 143.130 186.268  1.00  0.00           O
ATOM    310  N   TRP X  20     134.399 143.853 184.653  1.00  0.00           N
ATOM    311  H   TRP X  20     134.528 144.164 183.701  1.00  0.00           H
ATOM    312  CA  TRP X  20     135.593 143.749 185.477  1.00  0.00           C
ATOM    313  HA  TRP X  20     135.547 142.750 185.910  1.00  0.00           H
ATOM    314  CB  TRP X  20     136.786 143.925 184.523  1.00  0.00           C
ATOM    315  HB2 TRP X  20     136.650 143.273 183.661  1.00  0.00           H
ATOM    316  HB3 TRP X  20     136.851 144.950 184.157  1.00  0.00           H
ATOM    317  CG  TRP X  20     138.152 143.644 185.045  1.00  0.00           C
ATOM    318  CD1 TRP X  20     138.430 142.889 186.144  1.00  0.00           C
ATOM    319  HD1 TRP X  20     137.714 142.362 186.757  1.00  0.00           H
ATOM    320  NE1 TRP X  20     139.804 143.010 186.408  1.00  0.00           N
ATOM    321  HE1 TRP X  20     140.292 142.504 187.133  1.00  0.00           H
ATOM    322  CE2 TRP X  20     140.363 144.089 185.698  1.00  0.00           C
ATOM    323  CZ2 TRP X  20     141.570 144.755 185.758  1.00  0.00           C
ATOM    324  HZ2 TRP X  20     142.238 144.451 186.551  1.00  0.00           H
ATOM    325  CH2 TRP X  20     141.890 145.748 184.800  1.00  0.00           C
ATOM    326  HH2 TRP X  20     142.847 146.247 184.768  1.00  0.00           H
ATOM    327  CZ3 TRP X  20     140.843 146.087 183.843  1.00  0.00           C
ATOM    328  HZ3 TRP X  20     140.964 146.870 183.109  1.00  0.00           H
ATOM    329  CE3 TRP X  20     139.573 145.482 183.917  1.00  0.00           C
ATOM    330  HE3 TRP X  20     138.807 145.836 183.243  1.00  0.00           H
ATOM    331  CD2 TRP X  20     139.328 144.440 184.755  1.00  0.00           C
ATOM    332  C   TRP X  20     135.656 144.900 186.464  1.00  0.00           C
ATOM    333  O   TRP X  20     136.245 144.704 187.520  1.00  0.00           O
ATOM    334  N   ARG X  21     135.041 146.073 186.162  1.00  0.00           N
ATOM    335  H   ARG X  21     134.528 146.137 185.294  1.00  0.00           H
ATOM    336  CA  ARG X  21     135.084 147.319 186.879  1.00  0.00           C
ATOM    337  HA  ARG X  21     134.615 148.081 186.257  1.00  0.00           H
ATOM    338  CB  ARG X  21     134.189 147.203 188.151  1.00  0.00           C
ATOM    339  HB2 ARG X  21     134.543 146.535 188.936  1.00  0.00           H
ATOM    340  HB3 ARG X  21     134.211 148.205 188.579  1.00  0.00           H
ATOM    341  CG  ARG X  21     132.686 146.904 187.873  1.00  0.00           C
ATOM    342  HG2 ARG X  21     132.423 147.770 187.266  1.00  0.00           H
ATOM    343  HG3 ARG X  21     132.446 146.030 187.268  1.00  0.00           H
ATOM    344  CD  ARG X  21     131.894 146.746 189.138  1.00  0.00           C
ATOM    345  HD2 ARG X  21     132.454 145.903 189.541  1.00  0.00           H
ATOM    346  HD3 ARG X  21     131.877 147.735 189.596  1.00  0.00           H
ATOM    347  NE  ARG X  21     130.481 146.301 188.921  1.00  0.00           N
ATOM    348  HE  ARG X  21     130.079 146.548 188.028  1.00  0.00           H
ATOM    349  CZ  ARG X  21     129.779 145.458 189.606  1.00  0.00           C
ATOM    350  NH1 ARG X  21     130.163 144.942 190.747  1.00  0.00           N
ATOM    351 HH11 ARG X  21     130.980 145.179 191.292  1.00  0.00           H
ATOM    352 HH12 ARG X  21     129.665 144.166 191.158  1.00  0.00           H
ATOM    353  NH2 ARG X  21     128.652 145.003 189.186  1.00  0.00           N
ATOM    354 HH21 ARG X  21     128.327 145.277 188.270  1.00  0.00           H
ATOM    355 HH22 ARG X  21     128.236 144.236 189.695  1.00  0.00           H
ATOM    356  C   ARG X  21     136.527 147.826 187.191  1.00  0.00           C
ATOM    357  O   ARG X  21     137.473 147.134 186.808  1.00  0.00           O
ATOM    358  N   GLN X  22     136.670 148.981 187.737  1.00  0.00           N
ATOM    359  H   GLN X  22     135.836 149.528 187.898  1.00  0.00           H
ATOM    360  CA  GLN X  22     137.977 149.588 188.168  1.00  0.00           C
ATOM    361  HA  GLN X  22     138.732 149.289 187.441  1.00  0.00           H
ATOM    362  CB  GLN X  22     137.924 151.155 188.009  1.00  0.00           C
ATOM    363  HB2 GLN X  22     137.813 151.423 186.958  1.00  0.00           H
ATOM    364  HB3 GLN X  22     137.122 151.586 188.608  1.00  0.00           H
ATOM    365  CG  GLN X  22     139.179 151.754 188.539  1.00  0.00           C
ATOM    366  HG2 GLN X  22     139.091 152.838 188.619  1.00  0.00           H
ATOM    367  HG3 GLN X  22     139.485 151.457 189.542  1.00  0.00           H
ATOM    368  CD  GLN X  22     140.375 151.372 187.703  1.00  0.00           C
ATOM    369  OE1 GLN X  22     141.053 150.373 187.912  1.00  0.00           O
ATOM    370  NE2 GLN X  22     140.847 152.211 186.835  1.00  0.00           N
ATOM    371 HE21 GLN X  22     141.718 151.950 186.395  1.00  0.00           H
ATOM    372 HE22 GLN X  22     140.319 153.024 186.552  1.00  0.00           H
ATOM    373  C   GLN X  22     138.434 149.052 189.507  1.00  0.00           C
ATOM    374  O   GLN X  22     137.757 149.408 190.483  1.00  0.00           O
ATOM    375  N   SER X  23     139.508 148.308 189.568  1.00  0.00           N
ATOM    376  H   SER X  23     139.895 148.148 188.649  1.00  0.00           H
ATOM    377  CA  SER X  23     140.169 147.639 190.682  1.00  0.00           C
ATOM    378  HA  SER X  23     139.957 148.107 191.643  1.00  0.00           H
ATOM    379  CB  SER X  23     139.525 146.278 190.756  1.00  0.00           C
ATOM    380  HB2 SER X  23     138.460 146.278 190.528  1.00  0.00           H
ATOM    381  HB3 SER X  23     140.046 145.740 189.964  1.00  0.00           H
ATOM    382  OG  SER X  23     139.851 145.532 191.949  1.00  0.00           O
ATOM    383  HG  SER X  23     139.364 144.713 191.840  1.00  0.00           H
ATOM    384  C   SER X  23     141.712 147.518 190.563  1.00  0.00           C
ATOM    385  O   SER X  23     142.441 146.816 191.255  1.00  0.00           O
ATOM    386  N   SER X  24     142.281 148.348 189.694  1.00  0.00           N
ATOM    387  H   SER X  24     141.767 149.061 189.196  1.00  0.00           H
ATOM    388  CA  SER X  24     143.734 148.608 189.508  1.00  0.00           C
ATOM    389  HA  SER X  24     144.344 147.898 190.066  1.00  0.00           H
ATOM    390  CB  SER X  24     143.978 148.234 188.018  1.00  0.00           C
ATOM    391  HB2 SER X  24     143.682 147.208 187.803  1.00  0.00           H
ATOM    392  HB3 SER X  24     143.271 148.819 187.430  1.00  0.00           H
ATOM    393  OG  SER X  24     145.347 148.391 187.612  1.00  0.00           O
ATOM    394  HG  SER X  24     145.370 148.077 186.704  1.00  0.00           H
ATOM    395  C   SER X  24     144.176 150.010 189.907  1.00  0.00           C
ATOM    396  O   SER X  24     145.352 150.115 190.314  1.00  0.00           O
ATOM    397  N   GLY X  25     143.322 150.981 189.669  1.00  0.00           N
ATOM    398  H   GLY X  25     142.406 150.805 189.280  1.00  0.00           H
ATOM    399  CA  GLY X  25     143.641 152.450 189.578  1.00  0.00           C
ATOM    400  HA2 GLY X  25     144.613 152.737 189.978  1.00  0.00           H
ATOM    401  HA3 GLY X  25     143.582 152.669 188.512  1.00  0.00           H
ATOM    402  C   GLY X  25     142.604 153.312 190.304  1.00  0.00           C
ATOM    403  O   GLY X  25     141.840 152.833 191.153  1.00  0.00           O
ATOM    404  N   ARG X  26     142.837 154.655 190.038  1.00  0.00           N
ATOM    405  H   ARG X  26     143.646 154.968 189.520  1.00  0.00           H
ATOM    406  CA  ARG X  26     142.165 155.776 190.779  1.00  0.00           C
ATOM    407  HA  ARG X  26     142.208 155.593 191.853  1.00  0.00           H
ATOM    408  CB  ARG X  26     142.954 157.037 190.518  1.00  0.00           C
ATOM    409  HB2 ARG X  26     142.437 157.844 191.038  1.00  0.00           H
ATOM    410  HB3 ARG X  26     143.958 156.890 190.917  1.00  0.00           H
ATOM    411  CG  ARG X  26     142.921 157.381 189.024  1.00  0.00           C
ATOM    412  HG2 ARG X  26     143.169 156.532 188.387  1.00  0.00           H
ATOM    413  HG3 ARG X  26     141.918 157.686 188.724  1.00  0.00           H
ATOM    414  CD  ARG X  26     143.831 158.592 188.765  1.00  0.00           C
ATOM    415  HD2 ARG X  26     143.832 158.858 187.708  1.00  0.00           H
ATOM    416  HD3 ARG X  26     143.501 159.417 189.397  1.00  0.00           H
ATOM    417  NE  ARG X  26     145.224 158.226 188.976  1.00  0.00           N
ATOM    418  HE  ARG X  26     145.435 157.239 188.945  1.00  0.00           H
ATOM    419  CZ  ARG X  26     146.274 158.973 189.263  1.00  0.00           C
ATOM    420  NH1 ARG X  26     146.099 160.305 189.290  1.00  0.00           N
ATOM    421 HH11 ARG X  26     145.198 160.657 188.999  1.00  0.00           H
ATOM    422 HH12 ARG X  26     146.846 160.974 189.413  1.00  0.00           H
ATOM    423  NH2 ARG X  26     147.509 158.491 189.351  1.00  0.00           N
ATOM    424 HH21 ARG X  26     147.625 157.488 189.342  1.00  0.00           H
ATOM    425 HH22 ARG X  26     148.296 159.113 189.468  1.00  0.00           H
ATOM    426  C   ARG X  26     140.699 155.778 190.258  1.00  0.00           C
ATOM    427  O   ARG X  26     140.536 155.530 189.116  1.00  0.00           O
ATOM    428  N   GLY X  27     139.741 155.945 191.158  1.00  0.00           N
ATOM    429  H   GLY X  27     140.117 156.107 192.081  1.00  0.00           H
ATOM    430  CA  GLY X  27     138.289 155.647 190.973  1.00  0.00           C
ATOM    431  HA2 GLY X  27     138.165 154.572 190.845  1.00  0.00           H
ATOM    432  HA3 GLY X  27     137.768 155.828 191.913  1.00  0.00           H
ATOM    433  C   GLY X  27     137.611 156.365 189.894  1.00  0.00           C
ATOM    434  O   GLY X  27     136.678 155.798 189.294  1.00  0.00           O
ATOM    435  N   LYS X  28     138.089 157.608 189.434  1.00  0.00           N
ATOM    436  H   LYS X  28     138.830 158.022 189.980  1.00  0.00           H
ATOM    437  CA  LYS X  28     137.509 158.375 188.363  1.00  0.00           C
ATOM    438  HA  LYS X  28     136.423 158.357 188.454  1.00  0.00           H
ATOM    439  CB  LYS X  28     137.966 159.859 188.440  1.00  0.00           C
ATOM    440  HB2 LYS X  28     137.753 160.112 189.478  1.00  0.00           H
ATOM    441  HB3 LYS X  28     139.015 160.020 188.189  1.00  0.00           H
ATOM    442  CG  LYS X  28     137.142 160.785 187.433  1.00  0.00           C
ATOM    443  HG2 LYS X  28     137.315 160.440 186.414  1.00  0.00           H
ATOM    444  HG3 LYS X  28     136.081 160.707 187.669  1.00  0.00           H
ATOM    445  CD  LYS X  28     137.451 162.269 187.454  1.00  0.00           C
ATOM    446  HD2 LYS X  28     138.471 162.312 187.072  1.00  0.00           H
ATOM    447  HD3 LYS X  28     136.797 162.828 186.785  1.00  0.00           H
ATOM    448  CE  LYS X  28     137.416 163.020 188.807  1.00  0.00           C
ATOM    449  HE2 LYS X  28     136.411 162.859 189.197  1.00  0.00           H
ATOM    450  HE3 LYS X  28     138.236 162.681 189.440  1.00  0.00           H
ATOM    451  NZ  LYS X  28     137.568 164.544 188.625  1.00  0.00           N
ATOM    452  HZ1 LYS X  28     137.401 165.012 189.505  1.00  0.00           H
ATOM    453  HZ2 LYS X  28     136.824 164.988 188.106  1.00  0.00           H
ATOM    454  HZ3 LYS X  28     138.455 164.883 188.282  1.00  0.00           H
ATOM    455  C   LYS X  28     137.949 157.791 186.971  1.00  0.00           C
ATOM    456  O   LYS X  28     137.177 157.905 185.977  1.00  0.00           O
ATOM    457  N   LEU X  29     139.116 157.152 186.896  1.00  0.00           N
ATOM    458  H   LEU X  29     139.604 156.999 187.766  1.00  0.00           H
ATOM    459  CA  LEU X  29     139.795 156.726 185.676  1.00  0.00           C
ATOM    460  HA  LEU X  29     139.675 157.529 184.949  1.00  0.00           H
ATOM    461  CB  LEU X  29     141.288 156.542 185.963  1.00  0.00           C
ATOM    462  HB2 LEU X  29     141.511 157.478 186.475  1.00  0.00           H
ATOM    463  HB3 LEU X  29     141.359 155.678 186.624  1.00  0.00           H
ATOM    464  CG  LEU X  29     142.371 156.328 184.835  1.00  0.00           C
ATOM    465  HG  LEU X  29     142.178 155.376 184.340  1.00  0.00           H
ATOM    466  CD1 LEU X  29     142.395 157.553 183.941  1.00  0.00           C
ATOM    467 HD11 LEU X  29     141.993 157.280 182.966  1.00  0.00           H
ATOM    468 HD12 LEU X  29     143.414 157.891 183.755  1.00  0.00           H
ATOM    469 HD13 LEU X  29     141.849 158.429 184.291  1.00  0.00           H
ATOM    470  CD2 LEU X  29     143.761 156.161 185.472  1.00  0.00           C
ATOM    471 HD21 LEU X  29     143.728 155.350 186.200  1.00  0.00           H
ATOM    472 HD22 LEU X  29     144.489 155.810 184.741  1.00  0.00           H
ATOM    473 HD23 LEU X  29     144.155 157.014 186.023  1.00  0.00           H
ATOM    474  C   LEU X  29     139.125 155.413 185.165  1.00  0.00           C
ATOM    475  O   LEU X  29     139.049 154.469 185.980  1.00  0.00           O
ATOM    476  N   PRO X  30     138.642 155.298 183.835  1.00  0.00           N
ATOM    477  CD  PRO X  30     138.439 156.271 182.753  1.00  0.00           C
ATOM    478  HD2 PRO X  30     139.321 156.428 182.132  1.00  0.00           H
ATOM    479  HD3 PRO X  30     138.147 157.244 183.147  1.00  0.00           H
ATOM    480  CG  PRO X  30     137.326 155.732 181.784  1.00  0.00           C
ATOM    481  HG2 PRO X  30     137.577 155.929 180.742  1.00  0.00           H
ATOM    482  HG3 PRO X  30     136.378 156.226 181.999  1.00  0.00           H
ATOM    483  CB  PRO X  30     137.327 154.239 182.073  1.00  0.00           C
ATOM    484  HB2 PRO X  30     138.020 153.818 181.345  1.00  0.00           H
ATOM    485  HB3 PRO X  30     136.370 153.761 181.865  1.00  0.00           H
ATOM    486  CA  PRO X  30     137.882 154.028 183.490  1.00  0.00           C
ATOM    487  HA  PRO X  30     137.074 153.975 184.220  1.00  0.00           H
ATOM    488  C   PRO X  30     138.783 152.831 183.561  1.00  0.00           C
ATOM    489  O   PRO X  30     139.974 153.004 183.545  1.00  0.00           O
ATOM    490  N   PRO X  31     138.187 151.610 183.791  1.00  0.00           N
ATOM    491  CD  PRO X  31     136.779 151.487 183.957  1.00  0.00           C
ATOM    492  HD2 PRO X  31     136.262 152.211 183.327  1.00  0.00           H
ATOM    493  HD3 PRO X  31     136.615 151.701 185.013  1.00  0.00           H
ATOM    494  CG  PRO X  31     136.429 150.124 183.622  1.00  0.00           C
ATOM    495  HG2 PRO X  31     136.402 149.909 182.554  1.00  0.00           H
ATOM    496  HG3 PRO X  31     135.546 149.930 184.231  1.00  0.00           H
ATOM    497  CB  PRO X  31     137.609 149.331 184.220  1.00  0.00           C
ATOM    498  HB2 PRO X  31     137.698 148.380 183.695  1.00  0.00           H
ATOM    499  HB3 PRO X  31     137.541 149.157 185.294  1.00  0.00           H
ATOM    500  CA  PRO X  31     138.771 150.302 183.854  1.00  0.00           C
ATOM    501  HA  PRO X  31     139.598 150.196 184.557  1.00  0.00           H
ATOM    502  C   PRO X  31     139.472 149.902 182.559  1.00  0.00           C
ATOM    503  O   PRO X  31     138.951 149.977 181.463  1.00  0.00           O
ATOM    504  N   GLY X  32     140.802 149.559 182.683  1.00  0.00           N
ATOM    505  H   GLY X  32     141.253 149.661 183.581  1.00  0.00           H
ATOM    506  CA  GLY X  32     141.526 149.053 181.506  1.00  0.00           C
ATOM    507  HA2 GLY X  32     141.001 148.219 181.040  1.00  0.00           H
ATOM    508  HA3 GLY X  32     141.639 149.956 180.905  1.00  0.00           H
ATOM    509  C   GLY X  32     143.003 148.694 181.745  1.00  0.00           C
ATOM    510  O   GLY X  32     143.505 148.667 182.858  1.00  0.00           O
ATOM    511  N   PRO X  33     143.770 148.417 180.675  1.00  0.00           N
ATOM    512  CD  PRO X  33     143.350 148.251 179.334  1.00  0.00           C
ATOM    513  HD2 PRO X  33     142.832 149.132 178.956  1.00  0.00           H
ATOM    514  HD3 PRO X  33     142.598 147.463 179.284  1.00  0.00           H
ATOM    515  CG  PRO X  33     144.543 147.864 178.474  1.00  0.00           C
ATOM    516  HG2 PRO X  33     144.961 148.778 178.052  1.00  0.00           H
ATOM    517  HG3 PRO X  33     144.347 147.235 177.605  1.00  0.00           H
ATOM    518  CB  PRO X  33     145.537 147.309 179.422  1.00  0.00           C
ATOM    519  HB2 PRO X  33     146.508 147.771 179.240  1.00  0.00           H
ATOM    520  HB3 PRO X  33     145.595 146.234 179.248  1.00  0.00           H
ATOM    521  CA  PRO X  33     145.098 147.806 180.779  1.00  0.00           C
ATOM    522  HA  PRO X  33     144.958 146.935 181.418  1.00  0.00           H
ATOM    523  C   PRO X  33     146.132 148.789 181.437  1.00  0.00           C
ATOM    524  O   PRO X  33     146.320 149.907 180.988  1.00  0.00           O
ATOM    525  N   THR X  34     146.727 148.480 182.608  1.00  0.00           N
ATOM    526  H   THR X  34     147.103 149.367 182.910  1.00  0.00           H
ATOM    527  CA  THR X  34     147.012 147.154 183.346  1.00  0.00           C
ATOM    528  HA  THR X  34     147.911 147.244 183.955  1.00  0.00           H
ATOM    529  CB  THR X  34     145.809 146.760 184.240  1.00  0.00           C
ATOM    530  HB  THR X  34     144.931 146.514 183.642  1.00  0.00           H
ATOM    531  CG2 THR X  34     145.882 145.625 185.223  1.00  0.00           C
ATOM    532 HG21 THR X  34     144.884 145.243 185.439  1.00  0.00           H
ATOM    533 HG22 THR X  34     146.432 145.910 186.120  1.00  0.00           H
ATOM    534 HG23 THR X  34     146.269 144.767 184.674  1.00  0.00           H
ATOM    535  OG1 THR X  34     145.487 147.917 184.988  1.00  0.00           O
ATOM    536  HG1 THR X  34     145.241 148.593 184.353  1.00  0.00           H
ATOM    537  C   THR X  34     147.295 146.032 182.353  1.00  0.00           C
ATOM    538  O   THR X  34     146.487 145.146 182.158  1.00  0.00           O
ATOM    539  N   PRO X  35     148.433 146.099 181.672  1.00  0.00           N
ATOM    540  CD  PRO X  35     149.486 147.059 181.773  1.00  0.00           C
ATOM    541  HD2 PRO X  35     150.256 146.679 182.443  1.00  0.00           H
ATOM    542  HD3 PRO X  35     149.217 148.074 182.066  1.00  0.00           H
ATOM    543  CG  PRO X  35     150.028 147.158 180.385  1.00  0.00           C
ATOM    544  HG2 PRO X  35     151.042 147.555 180.429  1.00  0.00           H
ATOM    545  HG3 PRO X  35     149.363 147.772 179.778  1.00  0.00           H
ATOM    546  CB  PRO X  35     150.018 145.731 180.024  1.00  0.00           C
ATOM    547  HB2 PRO X  35     150.896 145.200 180.392  1.00  0.00           H
ATOM    548  HB3 PRO X  35     149.896 145.564 178.954  1.00  0.00           H
ATOM    549  CA  PRO X  35     148.800 145.085 180.656  1.00  0.00           C
ATOM    550  HA  PRO X  35     148.007 145.029 179.911  1.00  0.00           H
ATOM    551  C   PRO X  35     149.106 143.716 181.255  1.00  0.00           C
ATOM    552  O   PRO X  35     149.106 142.763 180.418  1.00  0.00           O
ATOM    553  N   LEU X  36     149.271 143.493 182.559  1.00  0.00           N
ATOM    554  H   LEU X  36     149.248 144.257 183.218  1.00  0.00           H
ATOM    555  CA  LEU X  36     149.179 142.198 183.177  1.00  0.00           C
ATOM    556  HA  LEU X  36     148.879 141.432 182.461  1.00  0.00           H
ATOM    557  CB  LEU X  36     150.597 141.875 183.702  1.00  0.00           C
ATOM    558  HB2 LEU X  36     151.350 141.766 182.922  1.00  0.00           H
ATOM    559  HB3 LEU X  36     150.912 142.647 184.403  1.00  0.00           H
ATOM    560  CG  LEU X  36     150.549 140.555 184.549  1.00  0.00           C
ATOM    561  HG  LEU X  36     149.696 140.467 185.223  1.00  0.00           H
ATOM    562  CD1 LEU X  36     150.603 139.394 183.596  1.00  0.00           C
ATOM    563 HD11 LEU X  36     150.817 138.464 184.124  1.00  0.00           H
ATOM    564 HD12 LEU X  36     151.477 139.510 182.956  1.00  0.00           H
ATOM    565 HD13 LEU X  36     149.780 139.406 182.882  1.00  0.00           H
ATOM    566  CD2 LEU X  36     151.831 140.599 185.427  1.00  0.00           C
ATOM    567 HD21 LEU X  36     151.666 141.335 186.214  1.00  0.00           H
ATOM    568 HD22 LEU X  36     152.080 139.658 185.917  1.00  0.00           H
ATOM    569 HD23 LEU X  36     152.773 140.912 184.977  1.00  0.00           H
ATOM    570  C   LEU X  36     148.071 142.111 184.196  1.00  0.00           C
ATOM    571  O   LEU X  36     148.151 142.568 185.348  1.00  0.00           O
ATOM    572  N   PRO X  37     146.837 141.731 183.676  1.00  0.00           N
ATOM    573  CD  PRO X  37     146.401 141.594 182.284  1.00  0.00           C
ATOM    574  HD2 PRO X  37     146.610 140.599 181.891  1.00  0.00           H
ATOM    575  HD3 PRO X  37     146.814 142.301 181.565  1.00  0.00           H
ATOM    576  CG  PRO X  37     144.843 141.834 182.318  1.00  0.00           C
ATOM    577  HG2 PRO X  37     144.364 141.429 181.427  1.00  0.00           H
ATOM    578  HG3 PRO X  37     144.703 142.914 182.362  1.00  0.00           H
ATOM    579  CB  PRO X  37     144.605 141.032 183.598  1.00  0.00           C
ATOM    580  HB2 PRO X  37     144.731 139.991 183.303  1.00  0.00           H
ATOM    581  HB3 PRO X  37     143.566 141.174 183.897  1.00  0.00           H
ATOM    582  CA  PRO X  37     145.637 141.570 184.561  1.00  0.00           C
ATOM    583  HA  PRO X  37     145.256 142.565 184.792  1.00  0.00           H
ATOM    584  C   PRO X  37     145.719 140.518 185.664  1.00  0.00           C
ATOM    585  O   PRO X  37     144.725 140.304 186.390  1.00  0.00           O
ATOM    586  N   VAL X  38     146.779 139.714 185.759  1.00  0.00           N
ATOM    587  H   VAL X  38     147.642 140.159 185.481  1.00  0.00           H
ATOM    588  CA  VAL X  38     146.801 138.538 186.671  1.00  0.00           C
ATOM    589  HA  VAL X  38     145.851 138.580 187.204  1.00  0.00           H
ATOM    590  CB  VAL X  38     147.035 137.217 185.937  1.00  0.00           C
ATOM    591  HB  VAL X  38     147.005 136.355 186.604  1.00  0.00           H
ATOM    592  CG1 VAL X  38     146.124 136.933 184.765  1.00  0.00           C
ATOM    593 HG11 VAL X  38     146.240 135.893 184.460  1.00  0.00           H
ATOM    594 HG12 VAL X  38     145.117 137.191 185.093  1.00  0.00           H
ATOM    595 HG13 VAL X  38     146.329 137.546 183.887  1.00  0.00           H
ATOM    596  CG2 VAL X  38     148.486 137.167 185.410  1.00  0.00           C
ATOM    597 HG21 VAL X  38     149.161 137.102 186.264  1.00  0.00           H
ATOM    598 HG22 VAL X  38     148.627 138.012 184.736  1.00  0.00           H
ATOM    599 HG23 VAL X  38     148.580 136.270 184.798  1.00  0.00           H
ATOM    600  C   VAL X  38     147.898 138.683 187.730  1.00  0.00           C
ATOM    601  O   VAL X  38     148.859 139.380 187.502  1.00  0.00           O
ATOM    602  N   ILE X  39     147.924 137.966 188.891  1.00  0.00           N
ATOM    603  H   ILE X  39     147.176 137.327 189.122  1.00  0.00           H
ATOM    604  CA  ILE X  39     148.958 137.951 189.940  1.00  0.00           C
ATOM    605  HA  ILE X  39     148.472 137.416 190.756  1.00  0.00           H
ATOM    606  CB  ILE X  39     150.173 136.954 189.712  1.00  0.00           C
ATOM    607  HB  ILE X  39     150.600 136.889 190.712  1.00  0.00           H
ATOM    608  CG2 ILE X  39     149.602 135.555 189.386  1.00  0.00           C
ATOM    609 HG21 ILE X  39     150.388 134.827 189.184  1.00  0.00           H
ATOM    610 HG22 ILE X  39     148.971 135.688 188.507  1.00  0.00           H
ATOM    611 HG23 ILE X  39     149.138 135.338 190.348  1.00  0.00           H
ATOM    612  CG1 ILE X  39     151.188 137.509 188.710  1.00  0.00           C
ATOM    613 HG12 ILE X  39     150.914 137.455 187.657  1.00  0.00           H
ATOM    614 HG13 ILE X  39     151.290 138.566 188.955  1.00  0.00           H
ATOM    615  CD1 ILE X  39     152.512 136.813 188.678  1.00  0.00           C
ATOM    616 HD11 ILE X  39     153.234 137.463 188.184  1.00  0.00           H
ATOM    617 HD12 ILE X  39     152.444 135.823 188.226  1.00  0.00           H
ATOM    618 HD13 ILE X  39     152.815 136.560 189.694  1.00  0.00           H
ATOM    619  C   ILE X  39     149.357 139.291 190.496  1.00  0.00           C
ATOM    620  O   ILE X  39     150.275 139.306 191.319  1.00  0.00           O
ATOM    621  N   GLY X  40     148.725 140.421 190.214  1.00  0.00           N
ATOM    622  H   GLY X  40     147.898 140.319 189.644  1.00  0.00           H
ATOM    623  CA  GLY X  40     148.786 141.646 190.974  1.00  0.00           C
ATOM    624  HA2 GLY X  40     147.903 142.251 190.771  1.00  0.00           H
ATOM    625  HA3 GLY X  40     148.921 141.303 192.000  1.00  0.00           H
ATOM    626  C   GLY X  40     149.927 142.589 190.699  1.00  0.00           C
ATOM    627  O   GLY X  40     150.252 142.771 189.533  1.00  0.00           O
ATOM    628  N   ASN X  41     150.466 143.269 191.671  1.00  0.00           N
ATOM    629  H   ASN X  41     150.139 142.940 192.569  1.00  0.00           H
ATOM    630  CA  ASN X  41     151.427 144.413 191.442  1.00  0.00           C
ATOM    631  HA  ASN X  41     151.137 144.942 190.535  1.00  0.00           H
ATOM    632  CB  ASN X  41     151.364 145.369 192.645  1.00  0.00           C
ATOM    633  HB2 ASN X  41     151.787 144.850 193.505  1.00  0.00           H
ATOM    634  HB3 ASN X  41     151.939 146.284 192.500  1.00  0.00           H
ATOM    635  CG  ASN X  41     149.935 145.773 192.937  1.00  0.00           C
ATOM    636  OD1 ASN X  41     149.241 145.082 193.613  1.00  0.00           O
ATOM    637  ND2 ASN X  41     149.382 146.765 192.313  1.00  0.00           N
ATOM    638 HD21 ASN X  41     149.976 147.376 191.771  1.00  0.00           H
ATOM    639 HD22 ASN X  41     148.416 147.024 192.454  1.00  0.00           H
ATOM    640  C   ASN X  41     152.933 144.120 191.040  1.00  0.00           C
ATOM    641  O   ASN X  41     153.843 144.861 191.391  1.00  0.00           O
ATOM    642  N   ILE X  42     153.163 143.059 190.264  1.00  0.00           N
ATOM    643  H   ILE X  42     152.335 142.594 189.918  1.00  0.00           H
ATOM    644  CA  ILE X  42     154.537 142.574 190.080  1.00  0.00           C
ATOM    645  HA  ILE X  42     154.894 142.557 191.110  1.00  0.00           H
ATOM    646  CB  ILE X  42     154.605 141.082 189.632  1.00  0.00           C
ATOM    647  HB  ILE X  42     154.096 140.570 190.448  1.00  0.00           H
ATOM    648  CG2 ILE X  42     153.878 140.941 188.284  1.00  0.00           C
ATOM    649 HG21 ILE X  42     152.796 140.867 188.400  1.00  0.00           H
ATOM    650 HG22 ILE X  42     154.256 140.023 187.834  1.00  0.00           H
ATOM    651 HG23 ILE X  42     154.152 141.761 187.621  1.00  0.00           H
ATOM    652  CG1 ILE X  42     156.153 140.646 189.502  1.00  0.00           C
ATOM    653 HG12 ILE X  42     156.589 140.901 188.536  1.00  0.00           H
ATOM    654 HG13 ILE X  42     156.721 141.043 190.343  1.00  0.00           H
ATOM    655  CD1 ILE X  42     156.303 139.133 189.609  1.00  0.00           C
ATOM    656 HD11 ILE X  42     155.831 138.662 190.471  1.00  0.00           H
ATOM    657 HD12 ILE X  42     157.338 138.806 189.706  1.00  0.00           H
ATOM    658 HD13 ILE X  42     155.856 138.636 188.748  1.00  0.00           H
ATOM    659  C   ILE X  42     155.459 143.581 189.257  1.00  0.00           C
ATOM    660  O   ILE X  42     156.629 143.665 189.476  1.00  0.00           O
ATOM    661  N   LEU X  43     154.829 144.383 188.407  1.00  0.00           N
ATOM    662  H   LEU X  43     153.843 144.228 188.255  1.00  0.00           H
ATOM    663  CA  LEU X  43     155.438 145.508 187.747  1.00  0.00           C
ATOM    664  HA  LEU X  43     156.403 145.300 187.284  1.00  0.00           H
ATOM    665  CB  LEU X  43     154.605 145.783 186.513  1.00  0.00           C
ATOM    666  HB2 LEU X  43     153.735 146.354 186.837  1.00  0.00           H
ATOM    667  HB3 LEU X  43     155.149 146.337 185.748  1.00  0.00           H
ATOM    668  CG  LEU X  43     153.975 144.460 185.799  1.00  0.00           C
ATOM    669  HG  LEU X  43     153.277 143.879 186.401  1.00  0.00           H
ATOM    670  CD1 LEU X  43     153.184 145.028 184.550  1.00  0.00           C
ATOM    671 HD11 LEU X  43     152.990 144.115 183.988  1.00  0.00           H
ATOM    672 HD12 LEU X  43     153.775 145.764 184.007  1.00  0.00           H
ATOM    673 HD13 LEU X  43     152.237 145.492 184.827  1.00  0.00           H
ATOM    674  CD2 LEU X  43     155.156 143.527 185.302  1.00  0.00           C
ATOM    675 HD21 LEU X  43     155.770 144.079 184.591  1.00  0.00           H
ATOM    676 HD22 LEU X  43     155.844 143.223 186.091  1.00  0.00           H
ATOM    677 HD23 LEU X  43     154.772 142.705 184.699  1.00  0.00           H
ATOM    678  C   LEU X  43     155.781 146.717 188.583  1.00  0.00           C
ATOM    679  O   LEU X  43     156.547 147.581 188.104  1.00  0.00           O
ATOM    680  N   GLN X  44     155.361 146.771 189.891  1.00  0.00           N
ATOM    681  H   GLN X  44     154.812 146.009 190.262  1.00  0.00           H
ATOM    682  CA  GLN X  44     155.775 147.871 190.770  1.00  0.00           C
ATOM    683  HA  GLN X  44     156.306 148.694 190.292  1.00  0.00           H
ATOM    684  CB  GLN X  44     154.431 148.568 191.288  1.00  0.00           C
ATOM    685  HB2 GLN X  44     153.686 147.873 191.675  1.00  0.00           H
ATOM    686  HB3 GLN X  44     154.690 149.254 192.094  1.00  0.00           H
ATOM    687  CG  GLN X  44     153.594 149.346 190.212  1.00  0.00           C
ATOM    688  HG2 GLN X  44     153.348 148.671 189.392  1.00  0.00           H
ATOM    689  HG3 GLN X  44     152.568 149.536 190.527  1.00  0.00           H
ATOM    690  CD  GLN X  44     154.270 150.657 189.743  1.00  0.00           C
ATOM    691  OE1 GLN X  44     155.373 151.012 190.131  1.00  0.00           O
ATOM    692  NE2 GLN X  44     153.708 151.365 188.809  1.00  0.00           N
ATOM    693 HE21 GLN X  44     154.070 152.300 188.689  1.00  0.00           H
ATOM    694 HE22 GLN X  44     152.731 151.184 188.625  1.00  0.00           H
ATOM    695  C   GLN X  44     156.597 147.483 191.995  1.00  0.00           C
ATOM    696  O   GLN X  44     157.518 148.248 192.367  1.00  0.00           O
ATOM    697  N   ILE X  45     156.327 146.359 192.650  1.00  0.00           N
ATOM    698  H   ILE X  45     155.665 145.744 192.199  1.00  0.00           H
ATOM    699  CA  ILE X  45     157.061 145.771 193.712  1.00  0.00           C
ATOM    700  HA  ILE X  45     157.343 146.516 194.457  1.00  0.00           H
ATOM    701  CB  ILE X  45     156.219 144.611 194.403  1.00  0.00           C
ATOM    702  HB  ILE X  45     156.107 143.870 193.612  1.00  0.00           H
ATOM    703  CG2 ILE X  45     156.967 144.147 195.688  1.00  0.00           C
ATOM    704 HG21 ILE X  45     156.948 144.943 196.433  1.00  0.00           H
ATOM    705 HG22 ILE X  45     157.991 143.889 195.421  1.00  0.00           H
ATOM    706 HG23 ILE X  45     156.503 143.258 196.115  1.00  0.00           H
ATOM    707  CG1 ILE X  45     154.833 144.923 194.911  1.00  0.00           C
ATOM    708 HG12 ILE X  45     154.958 145.692 195.673  1.00  0.00           H
ATOM    709 HG13 ILE X  45     154.267 145.476 194.162  1.00  0.00           H
ATOM    710  CD1 ILE X  45     153.961 143.760 195.488  1.00  0.00           C
ATOM    711 HD11 ILE X  45     153.612 143.061 194.727  1.00  0.00           H
ATOM    712 HD12 ILE X  45     153.037 144.272 195.758  1.00  0.00           H
ATOM    713 HD13 ILE X  45     154.479 143.188 196.258  1.00  0.00           H
ATOM    714  C   ILE X  45     158.381 145.107 193.132  1.00  0.00           C
ATOM    715  O   ILE X  45     158.330 144.408 192.111  1.00  0.00           O
ATOM    716  N   ASP X  46     159.456 145.231 193.907  1.00  0.00           N
ATOM    717  H   ASP X  46     159.366 145.793 194.741  1.00  0.00           H
ATOM    718  CA  ASP X  46     160.619 144.378 193.660  1.00  0.00           C
ATOM    719  HA  ASP X  46     160.892 144.495 192.611  1.00  0.00           H
ATOM    720  CB  ASP X  46     161.771 145.098 194.360  1.00  0.00           C
ATOM    721  HB2 ASP X  46     161.758 146.125 193.993  1.00  0.00           H
ATOM    722  HB3 ASP X  46     161.574 145.107 195.432  1.00  0.00           H
ATOM    723  CG  ASP X  46     163.098 144.449 194.005  1.00  0.00           C
ATOM    724  OD1 ASP X  46     163.906 145.199 193.463  1.00  0.00           O
ATOM    725  OD2 ASP X  46     163.345 143.217 194.258  1.00  0.00           O
ATOM    726  C   ASP X  46     160.436 142.914 194.064  1.00  0.00           C
ATOM    727  O   ASP X  46     159.797 142.561 195.064  1.00  0.00           O
ATOM    728  N   ILE X  47     161.079 142.047 193.243  1.00  0.00           N
ATOM    729  H   ILE X  47     161.498 142.458 192.420  1.00  0.00           H
ATOM    730  CA  ILE X  47     160.908 140.620 193.331  1.00  0.00           C
ATOM    731  HA  ILE X  47     159.882 140.391 193.619  1.00  0.00           H
ATOM    732  CB  ILE X  47     161.082 139.985 191.919  1.00  0.00           C
ATOM    733  HB  ILE X  47     161.003 138.898 191.940  1.00  0.00           H
ATOM    734  CG2 ILE X  47     159.927 140.479 190.977  1.00  0.00           C
ATOM    735 HG21 ILE X  47     159.923 141.555 190.800  1.00  0.00           H
ATOM    736 HG22 ILE X  47     158.933 140.212 191.336  1.00  0.00           H
ATOM    737 HG23 ILE X  47     160.006 139.984 190.009  1.00  0.00           H
ATOM    738  CG1 ILE X  47     162.486 140.185 191.399  1.00  0.00           C
ATOM    739 HG12 ILE X  47     162.762 141.228 191.240  1.00  0.00           H
ATOM    740 HG13 ILE X  47     163.125 139.745 192.164  1.00  0.00           H
ATOM    741  CD1 ILE X  47     162.807 139.324 190.132  1.00  0.00           C
ATOM    742 HD11 ILE X  47     162.389 139.767 189.228  1.00  0.00           H
ATOM    743 HD12 ILE X  47     162.693 138.260 190.338  1.00  0.00           H
ATOM    744 HD13 ILE X  47     163.881 139.339 189.946  1.00  0.00           H
ATOM    745  C   ILE X  47     161.850 139.923 194.378  1.00  0.00           C
ATOM    746  O   ILE X  47     161.709 138.742 194.686  1.00  0.00           O
ATOM    747  N   LYS X  48     162.810 140.687 194.921  1.00  0.00           N
ATOM    748  H   LYS X  48     162.837 141.647 194.606  1.00  0.00           H
ATOM    749  CA  LYS X  48     163.782 140.371 196.032  1.00  0.00           C
ATOM    750  HA  LYS X  48     163.346 139.501 196.524  1.00  0.00           H
ATOM    751  CB  LYS X  48     165.105 139.790 195.550  1.00  0.00           C
ATOM    752  HB2 LYS X  48     165.623 139.503 196.466  1.00  0.00           H
ATOM    753  HB3 LYS X  48     165.015 138.867 194.977  1.00  0.00           H
ATOM    754  CG  LYS X  48     165.966 140.795 194.803  1.00  0.00           C
ATOM    755  HG2 LYS X  48     166.124 141.666 195.440  1.00  0.00           H
ATOM    756  HG3 LYS X  48     166.928 140.290 194.725  1.00  0.00           H
ATOM    757  CD  LYS X  48     165.682 141.073 193.351  1.00  0.00           C
ATOM    758  HD2 LYS X  48     166.036 140.219 192.774  1.00  0.00           H
ATOM    759  HD3 LYS X  48     164.616 141.264 193.220  1.00  0.00           H
ATOM    760  CE  LYS X  48     166.396 142.219 192.674  1.00  0.00           C
ATOM    761  HE2 LYS X  48     167.452 142.024 192.861  1.00  0.00           H
ATOM    762  HE3 LYS X  48     166.061 142.127 191.640  1.00  0.00           H
ATOM    763  NZ  LYS X  48     166.061 143.591 193.050  1.00  0.00           N
ATOM    764  HZ1 LYS X  48     166.366 143.758 193.999  1.00  0.00           H
ATOM    765  HZ2 LYS X  48     165.056 143.664 193.113  1.00  0.00           H
ATOM    766  HZ3 LYS X  48     166.421 144.346 192.483  1.00  0.00           H
ATOM    767  C   LYS X  48     164.081 141.408 197.188  1.00  0.00           C
ATOM    768  O   LYS X  48     164.355 141.039 198.317  1.00  0.00           O
ATOM    769  N   ASP X  49     164.033 142.652 196.823  1.00  0.00           N
ATOM    770  H   ASP X  49     163.736 142.820 195.873  1.00  0.00           H
ATOM    771  CA  ASP X  49     164.397 143.805 197.572  1.00  0.00           C
ATOM    772  HA  ASP X  49     164.907 143.430 198.459  1.00  0.00           H
ATOM    773  CB  ASP X  49     165.276 144.740 196.754  1.00  0.00           C
ATOM    774  HB2 ASP X  49     164.860 145.157 195.837  1.00  0.00           H
ATOM    775  HB3 ASP X  49     165.494 145.652 197.311  1.00  0.00           H
ATOM    776  CG  ASP X  49     166.608 144.259 196.461  1.00  0.00           C
ATOM    777  OD1 ASP X  49     167.326 143.824 197.404  1.00  0.00           O
ATOM    778  OD2 ASP X  49     167.048 144.452 195.327  1.00  0.00           O
ATOM    779  C   ASP X  49     163.094 144.470 198.078  1.00  0.00           C
ATOM    780  O   ASP X  49     162.981 145.729 198.092  1.00  0.00           O
ATOM    781  N   VAL X  50     162.174 143.576 198.575  1.00  0.00           N
ATOM    782  H   VAL X  50     162.423 142.610 198.734  1.00  0.00           H
ATOM    783  CA  VAL X  50     160.769 143.858 198.681  1.00  0.00           C
ATOM    784  HA  VAL X  50     160.408 144.190 197.708  1.00  0.00           H
ATOM    785  CB  VAL X  50     159.865 142.701 199.171  1.00  0.00           C
ATOM    786  HB  VAL X  50     160.021 142.578 200.243  1.00  0.00           H
ATOM    787  CG1 VAL X  50     158.398 143.100 199.102  1.00  0.00           C
ATOM    788 HG11 VAL X  50     158.063 143.192 198.069  1.00  0.00           H
ATOM    789 HG12 VAL X  50     157.778 142.286 199.477  1.00  0.00           H
ATOM    790 HG13 VAL X  50     158.288 143.998 199.710  1.00  0.00           H
ATOM    791  CG2 VAL X  50     160.232 141.423 198.372  1.00  0.00           C
ATOM    792 HG21 VAL X  50     161.268 141.159 198.581  1.00  0.00           H
ATOM    793 HG22 VAL X  50     159.963 141.588 197.328  1.00  0.00           H
ATOM    794 HG23 VAL X  50     159.541 140.657 198.724  1.00  0.00           H
ATOM    795  C   VAL X  50     160.523 145.076 199.611  1.00  0.00           C
ATOM    796  O   VAL X  50     159.890 146.010 199.182  1.00  0.00           O
ATOM    797  N   SER X  51     161.052 145.049 200.846  1.00  0.00           N
ATOM    798  H   SER X  51     161.406 144.177 201.213  1.00  0.00           H
ATOM    799  CA  SER X  51     161.023 146.203 201.784  1.00  0.00           C
ATOM    800  HA  SER X  51     159.970 146.290 202.051  1.00  0.00           H
ATOM    801  CB  SER X  51     161.774 145.887 203.011  1.00  0.00           C
ATOM    802  HB2 SER X  51     161.367 146.548 203.776  1.00  0.00           H
ATOM    803  HB3 SER X  51     161.486 144.930 203.447  1.00  0.00           H
ATOM    804  OG  SER X  51     163.150 145.952 202.841  1.00  0.00           O
ATOM    805  HG  SER X  51     163.453 145.071 203.074  1.00  0.00           H
ATOM    806  C   SER X  51     161.367 147.551 201.091  1.00  0.00           C
ATOM    807  O   SER X  51     160.834 148.604 201.456  1.00  0.00           O
ATOM    808  N   LYS X  52     162.366 147.577 200.092  1.00  0.00           N
ATOM    809  H   LYS X  52     162.908 146.742 199.922  1.00  0.00           H
ATOM    810  CA  LYS X  52     162.837 148.780 199.441  1.00  0.00           C
ATOM    811  HA  LYS X  52     162.882 149.549 200.212  1.00  0.00           H
ATOM    812  CB  LYS X  52     164.264 148.652 198.860  1.00  0.00           C
ATOM    813  HB2 LYS X  52     164.181 148.075 197.939  1.00  0.00           H
ATOM    814  HB3 LYS X  52     164.579 149.646 198.545  1.00  0.00           H
ATOM    815  CG  LYS X  52     165.318 148.173 199.844  1.00  0.00           C
ATOM    816  HG2 LYS X  52     165.272 148.942 200.615  1.00  0.00           H
ATOM    817  HG3 LYS X  52     165.118 147.195 200.282  1.00  0.00           H
ATOM    818  CD  LYS X  52     166.642 148.051 199.082  1.00  0.00           C
ATOM    819  HD2 LYS X  52     166.789 147.040 198.701  1.00  0.00           H
ATOM    820  HD3 LYS X  52     166.657 148.817 198.308  1.00  0.00           H
ATOM    821  CE  LYS X  52     167.857 148.294 199.992  1.00  0.00           C
ATOM    822  HE2 LYS X  52     167.690 149.213 200.554  1.00  0.00           H
ATOM    823  HE3 LYS X  52     167.999 147.506 200.731  1.00  0.00           H
ATOM    824  NZ  LYS X  52     169.129 148.368 199.195  1.00  0.00           N
ATOM    825  HZ1 LYS X  52     169.143 149.184 198.599  1.00  0.00           H
ATOM    826  HZ2 LYS X  52     169.141 147.586 198.556  1.00  0.00           H
ATOM    827  HZ3 LYS X  52     169.995 148.211 199.689  1.00  0.00           H
ATOM    828  C   LYS X  52     161.708 149.312 198.536  1.00  0.00           C
ATOM    829  O   LYS X  52     161.408 150.510 198.646  1.00  0.00           O
ATOM    830  N   SER X  53     161.157 148.404 197.778  1.00  0.00           N
ATOM    831  H   SER X  53     161.436 147.435 197.837  1.00  0.00           H
ATOM    832  CA  SER X  53     159.881 148.715 197.009  1.00  0.00           C
ATOM    833  HA  SER X  53     160.159 149.549 196.365  1.00  0.00           H
ATOM    834  CB  SER X  53     159.412 147.564 196.089  1.00  0.00           C
ATOM    835  HB2 SER X  53     158.877 147.949 195.222  1.00  0.00           H
ATOM    836  HB3 SER X  53     160.311 147.223 195.575  1.00  0.00           H
ATOM    837  OG  SER X  53     158.730 146.504 196.715  1.00  0.00           O
ATOM    838  HG  SER X  53     159.208 146.286 197.518  1.00  0.00           H
ATOM    839  C   SER X  53     158.694 149.268 197.906  1.00  0.00           C
ATOM    840  O   SER X  53     158.049 150.292 197.612  1.00  0.00           O
ATOM    841  N   LEU X  54     158.397 148.707 199.089  1.00  0.00           N
ATOM    842  H   LEU X  54     158.771 147.823 199.402  1.00  0.00           H
ATOM    843  CA  LEU X  54     157.320 149.204 199.945  1.00  0.00           C
ATOM    844  HA  LEU X  54     156.488 149.546 199.330  1.00  0.00           H
ATOM    845  CB  LEU X  54     156.952 148.115 200.995  1.00  0.00           C
ATOM    846  HB2 LEU X  54     157.858 147.549 201.213  1.00  0.00           H
ATOM    847  HB3 LEU X  54     156.412 148.531 201.846  1.00  0.00           H
ATOM    848  CG  LEU X  54     155.944 147.086 200.311  1.00  0.00           C
ATOM    849  HG  LEU X  54     155.047 147.684 200.146  1.00  0.00           H
ATOM    850  CD1 LEU X  54     156.276 146.286 199.065  1.00  0.00           C
ATOM    851 HD11 LEU X  54     157.254 145.809 199.129  1.00  0.00           H
ATOM    852 HD12 LEU X  54     156.333 146.994 198.238  1.00  0.00           H
ATOM    853 HD13 LEU X  54     155.563 145.537 198.721  1.00  0.00           H
ATOM    854  CD2 LEU X  54     155.639 146.123 201.380  1.00  0.00           C
ATOM    855 HD21 LEU X  54     154.750 145.585 201.050  1.00  0.00           H
ATOM    856 HD22 LEU X  54     156.525 145.496 201.483  1.00  0.00           H
ATOM    857 HD23 LEU X  54     155.387 146.561 202.345  1.00  0.00           H
ATOM    858  C   LEU X  54     157.537 150.574 200.557  1.00  0.00           C
ATOM    859  O   LEU X  54     156.658 151.383 200.701  1.00  0.00           O
ATOM    860  N   THR X  55     158.801 150.853 200.830  1.00  0.00           N
ATOM    861  H   THR X  55     159.462 150.090 200.853  1.00  0.00           H
ATOM    862  CA  THR X  55     159.186 152.144 201.443  1.00  0.00           C
ATOM    863  HA  THR X  55     158.380 152.435 202.117  1.00  0.00           H
ATOM    864  CB  THR X  55     160.490 152.077 202.226  1.00  0.00           C
ATOM    865  HB  THR X  55     160.831 153.100 202.385  1.00  0.00           H
ATOM    866  CG2 THR X  55     160.123 151.308 203.560  1.00  0.00           C
ATOM    867 HG21 THR X  55     161.066 151.019 204.023  1.00  0.00           H
ATOM    868 HG22 THR X  55     159.536 150.412 203.357  1.00  0.00           H
ATOM    869 HG23 THR X  55     159.586 151.987 204.222  1.00  0.00           H
ATOM    870  OG1 THR X  55     161.493 151.332 201.510  1.00  0.00           O
ATOM    871  HG1 THR X  55     161.356 150.386 201.604  1.00  0.00           H
ATOM    872  C   THR X  55     159.303 153.114 200.264  1.00  0.00           C
ATOM    873  O   THR X  55     158.894 154.290 200.436  1.00  0.00           O
ATOM    874  N   ASN X  56     159.874 152.750 199.091  1.00  0.00           N
ATOM    875  H   ASN X  56     160.227 151.811 198.976  1.00  0.00           H
ATOM    876  CA  ASN X  56     159.654 153.530 197.843  1.00  0.00           C
ATOM    877  HA  ASN X  56     160.344 154.362 197.978  1.00  0.00           H
ATOM    878  CB  ASN X  56     160.226 152.722 196.678  1.00  0.00           C
ATOM    879  HB2 ASN X  56     161.172 152.252 196.945  1.00  0.00           H
ATOM    880  HB3 ASN X  56     159.609 151.852 196.451  1.00  0.00           H
ATOM    881  CG  ASN X  56     160.482 153.466 195.480  1.00  0.00           C
ATOM    882  OD1 ASN X  56     159.722 154.260 194.972  1.00  0.00           O
ATOM    883  ND2 ASN X  56     161.613 153.347 194.911  1.00  0.00           N
ATOM    884 HD21 ASN X  56     162.312 152.702 195.253  1.00  0.00           H
ATOM    885 HD22 ASN X  56     161.781 153.998 194.158  1.00  0.00           H
ATOM    886  C   ASN X  56     158.265 154.017 197.608  1.00  0.00           C
ATOM    887  O   ASN X  56     158.009 155.199 197.680  1.00  0.00           O
ATOM    888  N   LEU X  57     157.333 153.056 197.457  1.00  0.00           N
ATOM    889  H   LEU X  57     157.716 152.126 197.357  1.00  0.00           H
ATOM    890  CA  LEU X  57     155.964 153.349 197.212  1.00  0.00           C
ATOM    891  HA  LEU X  57     155.972 154.050 196.377  1.00  0.00           H
ATOM    892  CB  LEU X  57     155.189 151.979 196.918  1.00  0.00           C
ATOM    893  HB2 LEU X  57     155.266 151.264 197.737  1.00  0.00           H
ATOM    894  HB3 LEU X  57     154.128 152.226 196.900  1.00  0.00           H
ATOM    895  CG  LEU X  57     155.558 151.252 195.580  1.00  0.00           C
ATOM    896  HG  LEU X  57     156.625 151.055 195.469  1.00  0.00           H
ATOM    897  CD1 LEU X  57     154.745 149.978 195.573  1.00  0.00           C
ATOM    898 HD11 LEU X  57     155.117 149.496 194.669  1.00  0.00           H
ATOM    899 HD12 LEU X  57     153.691 150.112 195.328  1.00  0.00           H
ATOM    900 HD13 LEU X  57     154.967 149.255 196.358  1.00  0.00           H
ATOM    901  CD2 LEU X  57     155.128 152.052 194.299  1.00  0.00           C
ATOM    902 HD21 LEU X  57     154.197 152.616 194.337  1.00  0.00           H
ATOM    903 HD22 LEU X  57     155.859 152.853 194.186  1.00  0.00           H
ATOM    904 HD23 LEU X  57     155.139 151.398 193.427  1.00  0.00           H
ATOM    905  C   LEU X  57     155.313 154.054 198.437  1.00  0.00           C
ATOM    906  O   LEU X  57     154.455 154.869 198.193  1.00  0.00           O
ATOM    907  N   SER X  58     155.806 153.871 199.635  1.00  0.00           N
ATOM    908  H   SER X  58     156.642 153.323 199.779  1.00  0.00           H
ATOM    909  CA  SER X  58     155.263 154.663 200.804  1.00  0.00           C
ATOM    910  HA  SER X  58     154.177 154.578 200.853  1.00  0.00           H
ATOM    911  CB  SER X  58     155.880 154.283 202.175  1.00  0.00           C
ATOM    912  HB2 SER X  58     156.964 154.228 202.074  1.00  0.00           H
ATOM    913  HB3 SER X  58     155.548 154.902 203.009  1.00  0.00           H
ATOM    914  OG  SER X  58     155.428 152.961 202.442  1.00  0.00           O
ATOM    915  HG  SER X  58     155.764 152.399 201.740  1.00  0.00           H
ATOM    916  C   SER X  58     155.571 156.151 200.555  1.00  0.00           C
ATOM    917  O   SER X  58     154.822 157.025 201.006  1.00  0.00           O
ATOM    918  N   LYS X  59     156.670 156.576 199.940  1.00  0.00           N
ATOM    919  H   LYS X  59     157.377 155.897 199.695  1.00  0.00           H
ATOM    920  CA  LYS X  59     156.858 158.003 199.597  1.00  0.00           C
ATOM    921  HA  LYS X  59     156.698 158.583 200.507  1.00  0.00           H
ATOM    922  CB  LYS X  59     158.257 158.372 199.113  1.00  0.00           C
ATOM    923  HB2 LYS X  59     158.522 157.746 198.261  1.00  0.00           H
ATOM    924  HB3 LYS X  59     158.337 159.447 198.947  1.00  0.00           H
ATOM    925  CG  LYS X  59     159.250 158.112 200.300  1.00  0.00           C
ATOM    926  HG2 LYS X  59     159.248 157.071 200.622  1.00  0.00           H
ATOM    927  HG3 LYS X  59     160.219 158.309 199.841  1.00  0.00           H
ATOM    928  CD  LYS X  59     159.285 158.987 201.548  1.00  0.00           C
ATOM    929  HD2 LYS X  59     158.408 158.706 202.132  1.00  0.00           H
ATOM    930  HD3 LYS X  59     160.146 158.617 202.106  1.00  0.00           H
ATOM    931  CE  LYS X  59     159.279 160.520 201.233  1.00  0.00           C
ATOM    932  HE2 LYS X  59     160.176 160.753 200.659  1.00  0.00           H
ATOM    933  HE3 LYS X  59     158.386 160.909 200.744  1.00  0.00           H
ATOM    934  NZ  LYS X  59     159.480 161.391 202.445  1.00  0.00           N
ATOM    935  HZ1 LYS X  59     159.937 162.258 202.200  1.00  0.00           H
ATOM    936  HZ2 LYS X  59     160.025 160.953 203.174  1.00  0.00           H
ATOM    937  HZ3 LYS X  59     158.643 161.562 202.985  1.00  0.00           H
ATOM    938  C   LYS X  59     155.793 158.519 198.644  1.00  0.00           C
ATOM    939  O   LYS X  59     155.517 159.737 198.688  1.00  0.00           O
ATOM    940  N   ILE X  60     155.198 157.706 197.757  1.00  0.00           N
ATOM    941  H   ILE X  60     155.298 156.715 197.929  1.00  0.00           H
ATOM    942  CA  ILE X  60     154.461 158.063 196.515  1.00  0.00           C
ATOM    943  HA  ILE X  60     154.701 159.097 196.266  1.00  0.00           H
ATOM    944  CB  ILE X  60     154.814 157.080 195.340  1.00  0.00           C
ATOM    945  HB  ILE X  60     154.474 156.084 195.623  1.00  0.00           H
ATOM    946  CG2 ILE X  60     154.117 157.478 194.041  1.00  0.00           C
ATOM    947 HG21 ILE X  60     154.246 156.748 193.241  1.00  0.00           H
ATOM    948 HG22 ILE X  60     154.445 158.489 193.802  1.00  0.00           H
ATOM    949 HG23 ILE X  60     153.054 157.526 194.276  1.00  0.00           H
ATOM    950  CG1 ILE X  60     156.395 156.952 195.122  1.00  0.00           C
ATOM    951 HG12 ILE X  60     156.861 157.920 195.307  1.00  0.00           H
ATOM    952 HG13 ILE X  60     156.818 156.324 195.906  1.00  0.00           H
ATOM    953  CD1 ILE X  60     156.893 156.452 193.733  1.00  0.00           C
ATOM    954 HD11 ILE X  60     156.745 157.257 193.013  1.00  0.00           H
ATOM    955 HD12 ILE X  60     156.347 155.586 193.359  1.00  0.00           H
ATOM    956 HD13 ILE X  60     157.948 156.177 193.725  1.00  0.00           H
ATOM    957  C   ILE X  60     152.950 158.009 196.767  1.00  0.00           C
ATOM    958  O   ILE X  60     152.227 158.950 196.409  1.00  0.00           O
ATOM    959  N   TYR X  61     152.555 156.881 197.386  1.00  0.00           N
ATOM    960  H   TYR X  61     153.193 156.148 197.661  1.00  0.00           H
ATOM    961  CA  TYR X  61     151.176 156.652 197.847  1.00  0.00           C
ATOM    962  HA  TYR X  61     150.424 157.159 197.243  1.00  0.00           H
ATOM    963  CB  TYR X  61     150.877 155.167 197.762  1.00  0.00           C
ATOM    964  HB2 TYR X  61     151.536 154.605 198.424  1.00  0.00           H
ATOM    965  HB3 TYR X  61     149.861 154.961 198.100  1.00  0.00           H
ATOM    966  CG  TYR X  61     151.095 154.499 196.430  1.00  0.00           C
ATOM    967  CD1 TYR X  61     151.301 153.083 196.406  1.00  0.00           C
ATOM    968  HD1 TYR X  61     151.354 152.521 197.327  1.00  0.00           H
ATOM    969  CE1 TYR X  61     151.356 152.398 195.187  1.00  0.00           C
ATOM    970  HE1 TYR X  61     151.401 151.320 195.233  1.00  0.00           H
ATOM    971  CZ  TYR X  61     151.260 153.141 194.016  1.00  0.00           C
ATOM    972  OH  TYR X  61     151.249 152.483 192.831  1.00  0.00           O
ATOM    973  HH  TYR X  61     151.040 153.067 192.097  1.00  0.00           H
ATOM    974  CE2 TYR X  61     151.083 154.513 194.023  1.00  0.00           C
ATOM    975  HE2 TYR X  61     151.059 155.072 193.099  1.00  0.00           H
ATOM    976  CD2 TYR X  61     150.950 155.184 195.208  1.00  0.00           C
ATOM    977  HD2 TYR X  61     150.743 156.243 195.243  1.00  0.00           H
ATOM    978  C   TYR X  61     150.872 157.241 199.242  1.00  0.00           C
ATOM    979  O   TYR X  61     151.912 157.499 199.957  1.00  0.00           O
ATOM    980  N   GLY X  62     149.622 157.499 199.579  1.00  0.00           N
ATOM    981  H   GLY X  62     148.828 157.078 199.117  1.00  0.00           H
ATOM    982  CA  GLY X  62     149.281 158.137 200.843  1.00  0.00           C
ATOM    983  HA2 GLY X  62     149.889 159.038 200.934  1.00  0.00           H
ATOM    984  HA3 GLY X  62     148.196 158.237 200.873  1.00  0.00           H
ATOM    985  C   GLY X  62     149.410 157.237 202.061  1.00  0.00           C
ATOM    986  O   GLY X  62     149.830 156.096 201.854  1.00  0.00           O
ATOM    987  N   PRO X  63     149.130 157.759 203.279  1.00  0.00           N
ATOM    988  CD  PRO X  63     148.807 159.188 203.552  1.00  0.00           C
ATOM    989  HD2 PRO X  63     147.774 159.439 203.312  1.00  0.00           H
ATOM    990  HD3 PRO X  63     149.519 159.824 203.027  1.00  0.00           H
ATOM    991  CG  PRO X  63     148.967 159.321 205.037  1.00  0.00           C
ATOM    992  HG2 PRO X  63     148.250 160.000 205.497  1.00  0.00           H
ATOM    993  HG3 PRO X  63     149.926 159.739 205.344  1.00  0.00           H
ATOM    994  CB  PRO X  63     148.878 157.931 205.645  1.00  0.00           C
ATOM    995  HB2 PRO X  63     147.851 157.639 205.866  1.00  0.00           H
ATOM    996  HB3 PRO X  63     149.432 157.914 206.584  1.00  0.00           H
ATOM    997  CA  PRO X  63     149.514 157.113 204.532  1.00  0.00           C
ATOM    998  HA  PRO X  63     150.600 157.137 204.621  1.00  0.00           H
ATOM    999  C   PRO X  63     149.149 155.613 204.776  1.00  0.00           C
ATOM   1000  O   PRO X  63     149.788 154.940 205.584  1.00  0.00           O
ATOM   1001  N   VAL X  64     148.154 155.167 204.004  1.00  0.00           N
ATOM   1002  H   VAL X  64     147.734 155.850 203.390  1.00  0.00           H
ATOM   1003  CA  VAL X  64     147.620 153.787 203.829  1.00  0.00           C
ATOM   1004  HA  VAL X  64     148.298 153.104 204.342  1.00  0.00           H
ATOM   1005  CB  VAL X  64     146.243 153.723 204.568  1.00  0.00           C
ATOM   1006  HB  VAL X  64     145.595 154.489 204.141  1.00  0.00           H
ATOM   1007  CG1 VAL X  64     145.702 152.236 204.622  1.00  0.00           C
ATOM   1008 HG11 VAL X  64     145.474 151.855 203.627  1.00  0.00           H
ATOM   1009 HG12 VAL X  64     146.434 151.622 205.147  1.00  0.00           H
ATOM   1010 HG13 VAL X  64     144.722 152.321 205.090  1.00  0.00           H
ATOM   1011  CG2 VAL X  64     146.322 154.180 206.046  1.00  0.00           C
ATOM   1012 HG21 VAL X  64     147.091 153.599 206.556  1.00  0.00           H
ATOM   1013 HG22 VAL X  64     145.376 153.949 206.536  1.00  0.00           H
ATOM   1014 HG23 VAL X  64     146.447 155.262 206.046  1.00  0.00           H
ATOM   1015  C   VAL X  64     147.450 153.421 202.366  1.00  0.00           C
ATOM   1016  O   VAL X  64     146.863 154.241 201.632  1.00  0.00           O
ATOM   1017  N   PHE X  65     147.876 152.228 201.927  1.00  0.00           N
ATOM   1018  H   PHE X  65     148.364 151.705 202.640  1.00  0.00           H
ATOM   1019  CA  PHE X  65     147.695 151.772 200.551  1.00  0.00           C
ATOM   1020  HA  PHE X  65     146.682 151.978 200.205  1.00  0.00           H
ATOM   1021  CB  PHE X  65     148.756 152.216 199.540  1.00  0.00           C
ATOM   1022  HB2 PHE X  65     148.398 151.879 198.567  1.00  0.00           H
ATOM   1023  HB3 PHE X  65     148.663 153.302 199.541  1.00  0.00           H
ATOM   1024  CG  PHE X  65     150.237 151.836 199.709  1.00  0.00           C
ATOM   1025  CD1 PHE X  65     150.805 150.668 199.115  1.00  0.00           C
ATOM   1026  HD1 PHE X  65     150.237 150.016 198.467  1.00  0.00           H
ATOM   1027  CE1 PHE X  65     152.156 150.400 199.256  1.00  0.00           C
ATOM   1028  HE1 PHE X  65     152.630 149.633 198.661  1.00  0.00           H
ATOM   1029  CZ  PHE X  65     152.969 151.231 200.035  1.00  0.00           C
ATOM   1030  HZ  PHE X  65     154.032 151.061 200.123  1.00  0.00           H
ATOM   1031  CE2 PHE X  65     152.410 152.409 200.652  1.00  0.00           C
ATOM   1032  HE2 PHE X  65     153.089 153.107 201.119  1.00  0.00           H
ATOM   1033  CD2 PHE X  65     151.029 152.663 200.508  1.00  0.00           C
ATOM   1034  HD2 PHE X  65     150.557 153.524 200.956  1.00  0.00           H
ATOM   1035  C   PHE X  65     147.659 150.246 200.486  1.00  0.00           C
ATOM   1036  O   PHE X  65     148.456 149.553 201.085  1.00  0.00           O
ATOM   1037  N   THR X  66     146.890 149.651 199.607  1.00  0.00           N
ATOM   1038  H   THR X  66     146.176 150.218 199.171  1.00  0.00           H
ATOM   1039  CA  THR X  66     146.942 148.229 199.325  1.00  0.00           C
ATOM   1040  HA  THR X  66     146.972 147.690 200.271  1.00  0.00           H
ATOM   1041  CB  THR X  66     145.645 147.702 198.787  1.00  0.00           C
ATOM   1042  HB  THR X  66     145.570 148.117 197.782  1.00  0.00           H
ATOM   1043  CG2 THR X  66     145.349 146.187 198.768  1.00  0.00           C
ATOM   1044 HG21 THR X  66     144.271 146.034 198.710  1.00  0.00           H
ATOM   1045 HG22 THR X  66     145.873 145.781 199.633  1.00  0.00           H
ATOM   1046 HG23 THR X  66     145.762 145.846 197.819  1.00  0.00           H
ATOM   1047  OG1 THR X  66     144.549 148.268 199.482  1.00  0.00           O
ATOM   1048  HG1 THR X  66     144.573 149.202 199.261  1.00  0.00           H
ATOM   1049  C   THR X  66     148.008 147.739 198.189  1.00  0.00           C
ATOM   1050  O   THR X  66     148.419 148.510 197.324  1.00  0.00           O
ATOM   1051  N   LEU X  67     148.258 146.409 198.245  1.00  0.00           N
ATOM   1052  H   LEU X  67     148.209 145.960 199.149  1.00  0.00           H
ATOM   1053  CA  LEU X  67     149.087 145.645 197.311  1.00  0.00           C
ATOM   1054  HA  LEU X  67     148.942 145.944 196.273  1.00  0.00           H
ATOM   1055  CB  LEU X  67     150.518 145.688 197.823  1.00  0.00           C
ATOM   1056  HB2 LEU X  67     150.461 145.224 198.808  1.00  0.00           H
ATOM   1057  HB3 LEU X  67     151.091 144.955 197.255  1.00  0.00           H
ATOM   1058  CG  LEU X  67     151.408 146.964 197.830  1.00  0.00           C
ATOM   1059  HG  LEU X  67     150.933 147.703 198.475  1.00  0.00           H
ATOM   1060  CD1 LEU X  67     152.849 146.640 198.205  1.00  0.00           C
ATOM   1061 HD11 LEU X  67     153.304 145.871 197.580  1.00  0.00           H
ATOM   1062 HD12 LEU X  67     152.890 146.154 199.180  1.00  0.00           H
ATOM   1063 HD13 LEU X  67     153.474 147.527 198.104  1.00  0.00           H
ATOM   1064  CD2 LEU X  67     151.534 147.464 196.427  1.00  0.00           C
ATOM   1065 HD21 LEU X  67     151.917 146.664 195.794  1.00  0.00           H
ATOM   1066 HD22 LEU X  67     150.579 147.854 196.075  1.00  0.00           H
ATOM   1067 HD23 LEU X  67     152.365 148.170 196.412  1.00  0.00           H
ATOM   1068  C   LEU X  67     148.564 144.237 197.155  1.00  0.00           C
ATOM   1069  O   LEU X  67     148.131 143.590 198.124  1.00  0.00           O
ATOM   1070  N   TYR X  68     148.726 143.643 195.992  1.00  0.00           N
ATOM   1071  H   TYR X  68     149.114 144.168 195.221  1.00  0.00           H
ATOM   1072  CA  TYR X  68     148.646 142.253 195.713  1.00  0.00           C
ATOM   1073  HA  TYR X  68     148.331 141.674 196.581  1.00  0.00           H
ATOM   1074  CB  TYR X  68     147.485 141.990 194.695  1.00  0.00           C
ATOM   1075  HB2 TYR X  68     147.616 142.656 193.843  1.00  0.00           H
ATOM   1076  HB3 TYR X  68     147.506 140.954 194.357  1.00  0.00           H
ATOM   1077  CG  TYR X  68     146.077 142.387 195.139  1.00  0.00           C
ATOM   1078  CD1 TYR X  68     145.229 141.317 195.442  1.00  0.00           C
ATOM   1079  HD1 TYR X  68     145.505 140.292 195.240  1.00  0.00           H
ATOM   1080  CE1 TYR X  68     143.990 141.555 196.055  1.00  0.00           C
ATOM   1081  HE1 TYR X  68     143.329 140.737 196.298  1.00  0.00           H
ATOM   1082  CZ  TYR X  68     143.629 142.885 196.284  1.00  0.00           C
ATOM   1083  OH  TYR X  68     142.355 143.115 196.869  1.00  0.00           O
ATOM   1084  HH  TYR X  68     142.171 144.057 196.830  1.00  0.00           H
ATOM   1085  CE2 TYR X  68     144.427 143.967 195.887  1.00  0.00           C
ATOM   1086  HE2 TYR X  68     144.052 144.965 196.060  1.00  0.00           H
ATOM   1087  CD2 TYR X  68     145.664 143.696 195.259  1.00  0.00           C
ATOM   1088  HD2 TYR X  68     146.340 144.511 195.047  1.00  0.00           H
ATOM   1089  C   TYR X  68     149.939 141.729 195.172  1.00  0.00           C
ATOM   1090  O   TYR X  68     150.649 142.356 194.494  1.00  0.00           O
ATOM   1091  N   PHE X  69     150.228 140.442 195.336  1.00  0.00           N
ATOM   1092  H   PHE X  69     149.652 139.883 195.948  1.00  0.00           H
ATOM   1093  CA  PHE X  69     151.312 139.635 194.626  1.00  0.00           C
ATOM   1094  HA  PHE X  69     151.364 139.922 193.576  1.00  0.00           H
ATOM   1095  CB  PHE X  69     152.689 140.051 195.341  1.00  0.00           C
ATOM   1096  HB2 PHE X  69     152.836 141.131 195.376  1.00  0.00           H
ATOM   1097  HB3 PHE X  69     152.671 139.689 196.369  1.00  0.00           H
ATOM   1098  CG  PHE X  69     153.900 139.462 194.690  1.00  0.00           C
ATOM   1099  CD1 PHE X  69     154.179 138.092 194.889  1.00  0.00           C
ATOM   1100  HD1 PHE X  69     153.587 137.544 195.608  1.00  0.00           H
ATOM   1101  CE1 PHE X  69     155.243 137.498 194.308  1.00  0.00           C
ATOM   1102  HE1 PHE X  69     155.349 136.455 194.567  1.00  0.00           H
ATOM   1103  CZ  PHE X  69     155.997 138.189 193.373  1.00  0.00           C
ATOM   1104  HZ  PHE X  69     156.814 137.666 192.899  1.00  0.00           H
ATOM   1105  CE2 PHE X  69     155.717 139.570 193.088  1.00  0.00           C
ATOM   1106  HE2 PHE X  69     156.438 140.137 192.517  1.00  0.00           H
ATOM   1107  CD2 PHE X  69     154.655 140.205 193.793  1.00  0.00           C
ATOM   1108  HD2 PHE X  69     154.411 141.251 193.685  1.00  0.00           H
ATOM   1109  C   PHE X  69     151.083 138.108 194.786  1.00  0.00           C
ATOM   1110  O   PHE X  69     150.804 137.631 195.918  1.00  0.00           O
ATOM   1111  N   GLY X  70     151.095 137.361 193.684  1.00  0.00           N
ATOM   1112  H   GLY X  70     151.270 137.857 192.822  1.00  0.00           H
ATOM   1113  CA  GLY X  70     150.814 135.968 193.604  1.00  0.00           C
ATOM   1114  HA2 GLY X  70     151.368 135.362 194.321  1.00  0.00           H
ATOM   1115  HA3 GLY X  70     151.059 135.471 192.666  1.00  0.00           H
ATOM   1116  C   GLY X  70     149.300 135.824 193.844  1.00  0.00           C
ATOM   1117  O   GLY X  70     148.515 136.148 192.979  1.00  0.00           O
ATOM   1118  N   LEU X  71     148.870 135.310 195.016  1.00  0.00           N
ATOM   1119  H   LEU X  71     149.574 134.923 195.628  1.00  0.00           H
ATOM   1120  CA  LEU X  71     147.541 135.239 195.543  1.00  0.00           C
ATOM   1121  HA  LEU X  71     146.865 135.781 194.882  1.00  0.00           H
ATOM   1122  CB  LEU X  71     147.156 133.795 195.705  1.00  0.00           C
ATOM   1123  HB2 LEU X  71     147.971 133.332 196.261  1.00  0.00           H
ATOM   1124  HB3 LEU X  71     146.215 133.712 196.250  1.00  0.00           H
ATOM   1125  CG  LEU X  71     147.030 133.001 194.336  1.00  0.00           C
ATOM   1126  HG  LEU X  71     147.904 133.340 193.779  1.00  0.00           H
ATOM   1127  CD1 LEU X  71     147.146 131.482 194.637  1.00  0.00           C
ATOM   1128 HD11 LEU X  71     148.154 131.193 194.934  1.00  0.00           H
ATOM   1129 HD12 LEU X  71     146.834 130.899 193.770  1.00  0.00           H
ATOM   1130 HD13 LEU X  71     146.431 131.231 195.420  1.00  0.00           H
ATOM   1131  CD2 LEU X  71     145.728 133.145 193.647  1.00  0.00           C
ATOM   1132 HD21 LEU X  71     145.487 134.202 193.532  1.00  0.00           H
ATOM   1133 HD22 LEU X  71     145.773 132.746 192.633  1.00  0.00           H
ATOM   1134 HD23 LEU X  71     144.921 132.727 194.247  1.00  0.00           H
ATOM   1135  C   LEU X  71     147.395 136.130 196.773  1.00  0.00           C
ATOM   1136  O   LEU X  71     146.290 136.137 197.319  1.00  0.00           O
ATOM   1137  N   GLU X  72     148.442 136.801 197.298  1.00  0.00           N
ATOM   1138  H   GLU X  72     149.307 136.848 196.779  1.00  0.00           H
ATOM   1139  CA  GLU X  72     148.297 137.611 198.525  1.00  0.00           C
ATOM   1140  HA  GLU X  72     147.739 137.002 199.236  1.00  0.00           H
ATOM   1141  CB  GLU X  72     149.660 138.003 199.021  1.00  0.00           C
ATOM   1142  HB2 GLU X  72     150.172 137.044 198.938  1.00  0.00           H
ATOM   1143  HB3 GLU X  72     150.018 138.730 198.293  1.00  0.00           H
ATOM   1144  CG  GLU X  72     149.898 138.451 200.500  1.00  0.00           C
ATOM   1145  HG2 GLU X  72     150.872 138.939 200.513  1.00  0.00           H
ATOM   1146  HG3 GLU X  72     149.211 139.248 200.782  1.00  0.00           H
ATOM   1147  CD  GLU X  72     149.804 137.333 201.553  1.00  0.00           C
ATOM   1148  OE1 GLU X  72     150.210 136.210 201.234  1.00  0.00           O
ATOM   1149  OE2 GLU X  72     149.378 137.570 202.670  1.00  0.00           O
ATOM   1150  C   GLU X  72     147.480 138.891 198.238  1.00  0.00           C
ATOM   1151  O   GLU X  72     147.322 139.364 197.041  1.00  0.00           O
ATOM   1152  N   ARG X  73     146.927 139.506 199.314  1.00  0.00           N
ATOM   1153  H   ARG X  73     147.059 139.099 200.229  1.00  0.00           H
ATOM   1154  CA  ARG X  73     146.505 140.910 199.385  1.00  0.00           C
ATOM   1155  HA  ARG X  73     146.940 141.509 198.586  1.00  0.00           H
ATOM   1156  CB  ARG X  73     145.037 141.114 199.269  1.00  0.00           C
ATOM   1157  HB2 ARG X  73     144.895 142.166 199.516  1.00  0.00           H
ATOM   1158  HB3 ARG X  73     144.764 140.798 198.262  1.00  0.00           H
ATOM   1159  CG  ARG X  73     144.091 140.301 200.185  1.00  0.00           C
ATOM   1160  HG2 ARG X  73     144.134 139.253 199.888  1.00  0.00           H
ATOM   1161  HG3 ARG X  73     144.373 140.411 201.232  1.00  0.00           H
ATOM   1162  CD  ARG X  73     142.593 140.765 200.115  1.00  0.00           C
ATOM   1163  HD2 ARG X  73     142.508 141.814 200.399  1.00  0.00           H
ATOM   1164  HD3 ARG X  73     142.279 140.672 199.075  1.00  0.00           H
ATOM   1165  NE  ARG X  73     141.596 139.969 200.891  1.00  0.00           N
ATOM   1166  HE  ARG X  73     141.953 139.505 201.713  1.00  0.00           H
ATOM   1167  CZ  ARG X  73     140.321 139.786 200.730  1.00  0.00           C
ATOM   1168  NH1 ARG X  73     139.712 140.316 199.724  1.00  0.00           N
ATOM   1169 HH11 ARG X  73     140.273 140.612 198.937  1.00  0.00           H
ATOM   1170 HH12 ARG X  73     138.819 139.886 199.531  1.00  0.00           H
ATOM   1171  NH2 ARG X  73     139.707 139.007 201.502  1.00  0.00           N
ATOM   1172 HH21 ARG X  73     140.205 138.651 202.306  1.00  0.00           H
ATOM   1173 HH22 ARG X  73     138.701 138.995 201.585  1.00  0.00           H
ATOM   1174  C   ARG X  73     147.076 141.440 200.681  1.00  0.00           C
ATOM   1175  O   ARG X  73     146.969 140.832 201.740  1.00  0.00           O
ATOM   1176  N   MET X  74     147.719 142.642 200.692  1.00  0.00           N
ATOM   1177  H   MET X  74     147.714 143.143 199.815  1.00  0.00           H
ATOM   1178  CA  MET X  74     148.442 143.245 201.836  1.00  0.00           C
ATOM   1179  HA  MET X  74     147.909 142.970 202.746  1.00  0.00           H
ATOM   1180  CB  MET X  74     149.817 142.606 202.011  1.00  0.00           C
ATOM   1181  HB2 MET X  74     150.272 142.779 202.986  1.00  0.00           H
ATOM   1182  HB3 MET X  74     149.712 141.545 201.787  1.00  0.00           H
ATOM   1183  CG  MET X  74     150.719 143.195 200.805  1.00  0.00           C
ATOM   1184  HG2 MET X  74     150.159 143.110 199.874  1.00  0.00           H
ATOM   1185  HG3 MET X  74     150.897 144.260 200.956  1.00  0.00           H
ATOM   1186  SD  MET X  74     152.225 142.194 200.852  1.00  0.00           S
ATOM   1187  CE  MET X  74     153.018 142.758 199.311  1.00  0.00           C
ATOM   1188  HE1 MET X  74     152.518 142.439 198.397  1.00  0.00           H
ATOM   1189  HE2 MET X  74     153.186 143.829 199.423  1.00  0.00           H
ATOM   1190  HE3 MET X  74     154.036 142.386 199.194  1.00  0.00           H
ATOM   1191  C   MET X  74     148.531 144.724 201.786  1.00  0.00           C
ATOM   1192  O   MET X  74     148.487 145.306 200.732  1.00  0.00           O
ATOM   1193  N   VAL X  75     148.553 145.314 203.038  1.00  0.00           N
ATOM   1194  H   VAL X  75     148.749 144.788 203.878  1.00  0.00           H
ATOM   1195  CA  VAL X  75     148.257 146.757 203.209  1.00  0.00           C
ATOM   1196  HA  VAL X  75     148.308 147.155 202.196  1.00  0.00           H
ATOM   1197  CB  VAL X  75     146.817 147.050 203.784  1.00  0.00           C
ATOM   1198  HB  VAL X  75     146.822 146.486 204.717  1.00  0.00           H
ATOM   1199  CG1 VAL X  75     146.567 148.507 204.183  1.00  0.00           C
ATOM   1200 HG11 VAL X  75     145.549 148.597 204.562  1.00  0.00           H
ATOM   1201 HG12 VAL X  75     147.270 148.722 204.988  1.00  0.00           H
ATOM   1202 HG13 VAL X  75     146.789 149.066 203.274  1.00  0.00           H
ATOM   1203  CG2 VAL X  75     145.588 146.609 202.923  1.00  0.00           C
ATOM   1204 HG21 VAL X  75     145.656 145.587 202.551  1.00  0.00           H
ATOM   1205 HG22 VAL X  75     145.568 147.226 202.025  1.00  0.00           H
ATOM   1206 HG23 VAL X  75     144.657 146.716 203.480  1.00  0.00           H
ATOM   1207  C   VAL X  75     149.364 147.359 204.057  1.00  0.00           C
ATOM   1208  O   VAL X  75     149.796 146.832 205.096  1.00  0.00           O
ATOM   1209  N   VAL X  76     149.894 148.488 203.537  1.00  0.00           N
ATOM   1210  H   VAL X  76     149.342 148.911 202.804  1.00  0.00           H
ATOM   1211  CA  VAL X  76     151.029 149.209 204.046  1.00  0.00           C
ATOM   1212  HA  VAL X  76     151.567 148.483 204.656  1.00  0.00           H
ATOM   1213  CB  VAL X  76     152.026 149.622 202.902  1.00  0.00           C
ATOM   1214  HB  VAL X  76     151.510 150.307 202.229  1.00  0.00           H
ATOM   1215  CG1 VAL X  76     153.195 150.418 203.589  1.00  0.00           C
ATOM   1216 HG11 VAL X  76     154.022 150.367 202.880  1.00  0.00           H
ATOM   1217 HG12 VAL X  76     153.004 151.471 203.792  1.00  0.00           H
ATOM   1218 HG13 VAL X  76     153.461 149.982 204.551  1.00  0.00           H
ATOM   1219  CG2 VAL X  76     152.604 148.390 202.148  1.00  0.00           C
ATOM   1220 HG21 VAL X  76     153.235 148.876 201.403  1.00  0.00           H
ATOM   1221 HG22 VAL X  76     151.822 147.765 201.717  1.00  0.00           H
ATOM   1222 HG23 VAL X  76     153.349 147.826 202.709  1.00  0.00           H
ATOM   1223  C   VAL X  76     150.467 150.382 204.857  1.00  0.00           C
ATOM   1224  O   VAL X  76     149.481 151.013 204.405  1.00  0.00           O
ATOM   1225  N   LEU X  77     151.076 150.656 205.995  1.00  0.00           N
ATOM   1226  H   LEU X  77     151.892 150.095 206.196  1.00  0.00           H
ATOM   1227  CA  LEU X  77     150.885 151.922 206.728  1.00  0.00           C
ATOM   1228  HA  LEU X  77     150.184 152.522 206.149  1.00  0.00           H
ATOM   1229  CB  LEU X  77     150.165 151.631 208.102  1.00  0.00           C
ATOM   1230  HB2 LEU X  77     150.863 151.029 208.683  1.00  0.00           H
ATOM   1231  HB3 LEU X  77     150.038 152.586 208.610  1.00  0.00           H
ATOM   1232  CG  LEU X  77     148.784 150.913 207.920  1.00  0.00           C
ATOM   1233  HG  LEU X  77     148.470 150.837 206.878  1.00  0.00           H
ATOM   1234  CD1 LEU X  77     148.843 149.451 208.346  1.00  0.00           C
ATOM   1235 HD11 LEU X  77     149.425 148.869 207.631  1.00  0.00           H
ATOM   1236 HD12 LEU X  77     147.848 149.060 208.135  1.00  0.00           H
ATOM   1237 HD13 LEU X  77     149.141 149.332 209.388  1.00  0.00           H
ATOM   1238  CD2 LEU X  77     147.755 151.582 208.737  1.00  0.00           C
ATOM   1239 HD21 LEU X  77     147.656 152.657 208.588  1.00  0.00           H
ATOM   1240 HD22 LEU X  77     146.732 151.312 208.474  1.00  0.00           H
ATOM   1241 HD23 LEU X  77     148.081 151.330 209.746  1.00  0.00           H
ATOM   1242  C   LEU X  77     152.236 152.624 207.021  1.00  0.00           C
ATOM   1243  O   LEU X  77     153.226 151.894 207.177  1.00  0.00           O
ATOM   1244  N   HIE X  78     152.323 153.962 207.086  1.00  0.00           N
ATOM   1245  H   HIE X  78     151.422 154.419 207.078  1.00  0.00           H
ATOM   1246  CA  HIE X  78     153.598 154.717 206.924  1.00  0.00           C
ATOM   1247  HA  HIE X  78     154.318 154.263 207.605  1.00  0.00           H
ATOM   1248  CB  HIE X  78     154.137 154.674 205.543  1.00  0.00           C
ATOM   1249  HB2 HIE X  78     155.217 154.803 205.479  1.00  0.00           H
ATOM   1250  HB3 HIE X  78     153.892 153.703 205.111  1.00  0.00           H
ATOM   1251  CG  HIE X  78     153.473 155.586 204.539  1.00  0.00           C
ATOM   1252  ND1 HIE X  78     153.735 156.974 204.401  1.00  0.00           N
ATOM   1253  CE1 HIE X  78     152.974 157.404 203.397  1.00  0.00           C
ATOM   1254  HE1 HIE X  78     152.682 158.393 203.077  1.00  0.00           H
ATOM   1255  NE2 HIE X  78     152.410 156.344 202.754  1.00  0.00           N
ATOM   1256  HE2 HIE X  78     151.925 156.388 201.869  1.00  0.00           H
ATOM   1257  CD2 HIE X  78     152.664 155.173 203.494  1.00  0.00           C
ATOM   1258  HD2 HIE X  78     152.313 154.224 203.115  1.00  0.00           H
ATOM   1259  C   HIE X  78     153.648 156.150 207.574  1.00  0.00           C
ATOM   1260  O   HIE X  78     154.711 156.641 207.900  1.00  0.00           O
ATOM   1261  N   GLY X  79     152.447 156.739 207.838  1.00  0.00           N
ATOM   1262  H   GLY X  79     151.625 156.179 207.660  1.00  0.00           H
ATOM   1263  CA  GLY X  79     152.249 157.947 208.609  1.00  0.00           C
ATOM   1264  HA2 GLY X  79     153.177 158.512 208.520  1.00  0.00           H
ATOM   1265  HA3 GLY X  79     151.544 158.648 208.162  1.00  0.00           H
ATOM   1266  C   GLY X  79     151.877 157.584 210.058  1.00  0.00           C
ATOM   1267  O   GLY X  79     151.046 156.654 210.300  1.00  0.00           O
ATOM   1268  N   TYR X  80     152.516 158.197 211.037  1.00  0.00           N
ATOM   1269  H   TYR X  80     153.142 158.951 210.793  1.00  0.00           H
ATOM   1270  CA  TYR X  80     152.443 157.904 212.491  1.00  0.00           C
ATOM   1271  HA  TYR X  80     152.996 156.978 212.645  1.00  0.00           H
ATOM   1272  CB  TYR X  80     153.122 159.054 213.313  1.00  0.00           C
ATOM   1273  HB2 TYR X  80     154.195 159.129 213.139  1.00  0.00           H
ATOM   1274  HB3 TYR X  80     152.799 160.002 212.882  1.00  0.00           H
ATOM   1275  CG  TYR X  80     152.731 158.970 214.843  1.00  0.00           C
ATOM   1276  CD1 TYR X  80     153.218 157.910 215.636  1.00  0.00           C
ATOM   1277  HD1 TYR X  80     153.804 157.088 215.254  1.00  0.00           H
ATOM   1278  CE1 TYR X  80     152.746 157.833 216.933  1.00  0.00           C
ATOM   1279  HE1 TYR X  80     153.075 157.072 217.625  1.00  0.00           H
ATOM   1280  CZ  TYR X  80     151.944 158.779 217.527  1.00  0.00           C
ATOM   1281  OH  TYR X  80     151.588 158.590 218.829  1.00  0.00           O
ATOM   1282  HH  TYR X  80     151.772 157.769 219.291  1.00  0.00           H
ATOM   1283  CE2 TYR X  80     151.544 159.958 216.780  1.00  0.00           C
ATOM   1284  HE2 TYR X  80     151.165 160.797 217.344  1.00  0.00           H
ATOM   1285  CD2 TYR X  80     151.868 159.963 215.400  1.00  0.00           C
ATOM   1286  HD2 TYR X  80     151.540 160.770 214.762  1.00  0.00           H
ATOM   1287  C   TYR X  80     151.006 157.732 212.969  1.00  0.00           C
ATOM   1288  O   TYR X  80     150.820 156.843 213.793  1.00  0.00           O
ATOM   1289  N   GLU X  81     150.037 158.588 212.584  1.00  0.00           N
ATOM   1290  H   GLU X  81     150.236 159.328 211.926  1.00  0.00           H
ATOM   1291  CA  GLU X  81     148.654 158.516 213.141  1.00  0.00           C
ATOM   1292  HA  GLU X  81     148.764 158.440 214.223  1.00  0.00           H
ATOM   1293  CB  GLU X  81     147.805 159.735 212.790  1.00  0.00           C
ATOM   1294  HB2 GLU X  81     147.666 159.890 211.720  1.00  0.00           H
ATOM   1295  HB3 GLU X  81     146.788 159.548 213.136  1.00  0.00           H
ATOM   1296  CG  GLU X  81     148.142 161.076 213.404  1.00  0.00           C
ATOM   1297  HG2 GLU X  81     149.207 161.091 213.638  1.00  0.00           H
ATOM   1298  HG3 GLU X  81     147.842 161.834 212.681  1.00  0.00           H
ATOM   1299  CD  GLU X  81     147.404 161.380 214.765  1.00  0.00           C
ATOM   1300  OE1 GLU X  81     147.458 160.622 215.766  1.00  0.00           O
ATOM   1301  OE2 GLU X  81     146.978 162.546 214.953  1.00  0.00           O
ATOM   1302  C   GLU X  81     147.723 157.337 212.772  1.00  0.00           C
ATOM   1303  O   GLU X  81     146.913 156.830 213.572  1.00  0.00           O
ATOM   1304  N   VAL X  82     148.013 156.763 211.564  1.00  0.00           N
ATOM   1305  H   VAL X  82     148.767 157.234 211.085  1.00  0.00           H
ATOM   1306  CA  VAL X  82     147.485 155.428 211.101  1.00  0.00           C
ATOM   1307  HA  VAL X  82     146.521 155.246 211.576  1.00  0.00           H
ATOM   1308  CB  VAL X  82     147.097 155.585 209.580  1.00  0.00           C
ATOM   1309  HB  VAL X  82     146.741 154.616 209.230  1.00  0.00           H
ATOM   1310  CG1 VAL X  82     145.774 156.457 209.599  1.00  0.00           C
ATOM   1311 HG11 VAL X  82     145.872 157.354 210.211  1.00  0.00           H
ATOM   1312 HG12 VAL X  82     145.642 156.845 208.588  1.00  0.00           H
ATOM   1313 HG13 VAL X  82     144.884 155.907 209.905  1.00  0.00           H
ATOM   1314  CG2 VAL X  82     148.276 156.122 208.670  1.00  0.00           C
ATOM   1315 HG21 VAL X  82     148.677 157.065 209.043  1.00  0.00           H
ATOM   1316 HG22 VAL X  82     147.898 156.141 207.647  1.00  0.00           H
ATOM   1317 HG23 VAL X  82     149.154 155.496 208.514  1.00  0.00           H
ATOM   1318  C   VAL X  82     148.425 154.237 211.414  1.00  0.00           C
ATOM   1319  O   VAL X  82     147.923 153.172 211.780  1.00  0.00           O
ATOM   1320  N   VAL X  83     149.691 154.390 211.627  1.00  0.00           N
ATOM   1321  H   VAL X  83     150.129 155.265 211.378  1.00  0.00           H
ATOM   1322  CA  VAL X  83     150.646 153.384 212.156  1.00  0.00           C
ATOM   1323  HA  VAL X  83     150.387 152.497 211.578  1.00  0.00           H
ATOM   1324  CB  VAL X  83     152.139 153.810 212.031  1.00  0.00           C
ATOM   1325  HB  VAL X  83     152.256 154.830 212.398  1.00  0.00           H
ATOM   1326  CG1 VAL X  83     153.013 152.902 212.895  1.00  0.00           C
ATOM   1327 HG11 VAL X  83     152.820 153.036 213.960  1.00  0.00           H
ATOM   1328 HG12 VAL X  83     152.749 151.869 212.668  1.00  0.00           H
ATOM   1329 HG13 VAL X  83     154.047 153.026 212.575  1.00  0.00           H
ATOM   1330  CG2 VAL X  83     152.489 153.737 210.571  1.00  0.00           C
ATOM   1331 HG21 VAL X  83     151.650 154.022 209.936  1.00  0.00           H
ATOM   1332 HG22 VAL X  83     152.799 152.775 210.162  1.00  0.00           H
ATOM   1333 HG23 VAL X  83     153.363 154.376 210.448  1.00  0.00           H
ATOM   1334  C   VAL X  83     150.260 153.119 213.618  1.00  0.00           C
ATOM   1335  O   VAL X  83     150.059 151.971 214.019  1.00  0.00           O
ATOM   1336  N   LYS X  84     149.938 154.198 214.345  1.00  0.00           N
ATOM   1337  H   LYS X  84     150.360 155.083 214.105  1.00  0.00           H
ATOM   1338  CA  LYS X  84     149.352 154.137 215.759  1.00  0.00           C
ATOM   1339  HA  LYS X  84     149.998 153.443 216.296  1.00  0.00           H
ATOM   1340  CB  LYS X  84     149.397 155.470 216.538  1.00  0.00           C
ATOM   1341  HB2 LYS X  84     150.378 155.538 217.009  1.00  0.00           H
ATOM   1342  HB3 LYS X  84     149.248 156.283 215.828  1.00  0.00           H
ATOM   1343  CG  LYS X  84     148.281 155.668 217.572  1.00  0.00           C
ATOM   1344  HG2 LYS X  84     147.345 155.801 217.030  1.00  0.00           H
ATOM   1345  HG3 LYS X  84     148.171 154.745 218.141  1.00  0.00           H
ATOM   1346  CD  LYS X  84     148.390 156.763 218.536  1.00  0.00           C
ATOM   1347  HD2 LYS X  84     147.547 156.722 219.226  1.00  0.00           H
ATOM   1348  HD3 LYS X  84     149.314 156.736 219.114  1.00  0.00           H
ATOM   1349  CE  LYS X  84     148.338 158.107 217.861  1.00  0.00           C
ATOM   1350  HE2 LYS X  84     148.787 158.863 218.506  1.00  0.00           H
ATOM   1351  HE3 LYS X  84     148.881 158.063 216.917  1.00  0.00           H
ATOM   1352  NZ  LYS X  84     146.973 158.603 217.597  1.00  0.00           N
ATOM   1353  HZ1 LYS X  84     146.987 159.253 216.824  1.00  0.00           H
ATOM   1354  HZ2 LYS X  84     146.584 159.117 218.375  1.00  0.00           H
ATOM   1355  HZ3 LYS X  84     146.267 157.935 217.324  1.00  0.00           H
ATOM   1356  C   LYS X  84     148.021 153.474 215.784  1.00  0.00           C
ATOM   1357  O   LYS X  84     147.778 152.648 216.685  1.00  0.00           O
ATOM   1358  N   GLU X  85     147.117 153.785 214.846  1.00  0.00           N
ATOM   1359  H   GLU X  85     147.380 154.404 214.092  1.00  0.00           H
ATOM   1360  CA  GLU X  85     145.780 153.189 214.821  1.00  0.00           C
ATOM   1361  HA  GLU X  85     145.343 153.357 215.806  1.00  0.00           H
ATOM   1362  CB  GLU X  85     144.905 153.837 213.725  1.00  0.00           C
ATOM   1363  HB2 GLU X  85     145.178 154.886 213.607  1.00  0.00           H
ATOM   1364  HB3 GLU X  85     145.117 153.444 212.731  1.00  0.00           H
ATOM   1365  CG  GLU X  85     143.363 153.751 214.109  1.00  0.00           C
ATOM   1366  HG2 GLU X  85     142.913 153.029 213.427  1.00  0.00           H
ATOM   1367  HG3 GLU X  85     143.260 153.473 215.158  1.00  0.00           H
ATOM   1368  CD  GLU X  85     142.628 155.046 213.968  1.00  0.00           C
ATOM   1369  OE1 GLU X  85     141.614 155.088 213.233  1.00  0.00           O
ATOM   1370  OE2 GLU X  85     143.131 156.040 214.593  1.00  0.00           O
ATOM   1371  C   GLU X  85     145.811 151.592 214.660  1.00  0.00           C
ATOM   1372  O   GLU X  85     145.194 150.901 215.431  1.00  0.00           O
ATOM   1373  N   ALA X  86     146.527 151.124 213.623  1.00  0.00           N
ATOM   1374  H   ALA X  86     147.022 151.796 213.054  1.00  0.00           H
ATOM   1375  CA  ALA X  86     146.760 149.677 213.469  1.00  0.00           C
ATOM   1376  HA  ALA X  86     145.817 149.157 213.300  1.00  0.00           H
ATOM   1377  CB  ALA X  86     147.634 149.541 212.216  1.00  0.00           C
ATOM   1378  HB1 ALA X  86     147.094 149.728 211.287  1.00  0.00           H
ATOM   1379  HB2 ALA X  86     148.138 148.577 212.291  1.00  0.00           H
ATOM   1380  HB3 ALA X  86     148.442 150.242 212.427  1.00  0.00           H
ATOM   1381  C   ALA X  86     147.376 148.904 214.695  1.00  0.00           C
ATOM   1382  O   ALA X  86     146.946 147.750 214.950  1.00  0.00           O
ATOM   1383  N   LEU X  87     148.370 149.498 215.361  1.00  0.00           N
ATOM   1384  H   LEU X  87     148.715 150.373 214.994  1.00  0.00           H
ATOM   1385  CA  LEU X  87     149.001 148.819 216.537  1.00  0.00           C
ATOM   1386  HA  LEU X  87     149.109 147.767 216.271  1.00  0.00           H
ATOM   1387  CB  LEU X  87     150.433 149.368 216.654  1.00  0.00           C
ATOM   1388  HB2 LEU X  87     150.272 150.398 216.974  1.00  0.00           H
ATOM   1389  HB3 LEU X  87     150.802 148.985 217.605  1.00  0.00           H
ATOM   1390  CG  LEU X  87     151.426 149.078 215.463  1.00  0.00           C
ATOM   1391  HG  LEU X  87     151.161 149.675 214.591  1.00  0.00           H
ATOM   1392  CD1 LEU X  87     152.870 149.607 215.814  1.00  0.00           C
ATOM   1393 HD11 LEU X  87     152.917 150.678 215.613  1.00  0.00           H
ATOM   1394 HD12 LEU X  87     153.644 149.166 215.186  1.00  0.00           H
ATOM   1395 HD13 LEU X  87     153.123 149.516 216.870  1.00  0.00           H
ATOM   1396  CD2 LEU X  87     151.605 147.586 215.192  1.00  0.00           C
ATOM   1397 HD21 LEU X  87     152.246 147.013 215.863  1.00  0.00           H
ATOM   1398 HD22 LEU X  87     150.606 147.165 215.081  1.00  0.00           H
ATOM   1399 HD23 LEU X  87     152.011 147.548 214.181  1.00  0.00           H
ATOM   1400  C   LEU X  87     148.344 148.977 217.860  1.00  0.00           C
ATOM   1401  O   LEU X  87     148.350 148.066 218.683  1.00  0.00           O
ATOM   1402  N   ILE X  88     147.852 150.167 218.132  1.00  0.00           N
ATOM   1403  H   ILE X  88     147.590 150.747 217.348  1.00  0.00           H
ATOM   1404  CA  ILE X  88     147.431 150.706 219.493  1.00  0.00           C
ATOM   1405  HA  ILE X  88     147.679 149.923 220.210  1.00  0.00           H
ATOM   1406  CB  ILE X  88     148.314 151.908 219.832  1.00  0.00           C
ATOM   1407  HB  ILE X  88     148.406 152.694 219.082  1.00  0.00           H
ATOM   1408  CG2 ILE X  88     147.971 152.711 221.134  1.00  0.00           C
ATOM   1409 HG21 ILE X  88     148.052 152.009 221.964  1.00  0.00           H
ATOM   1410 HG22 ILE X  88     146.941 152.989 220.907  1.00  0.00           H
ATOM   1411 HG23 ILE X  88     148.645 153.537 221.360  1.00  0.00           H
ATOM   1412  CG1 ILE X  88     149.740 151.353 220.039  1.00  0.00           C
ATOM   1413 HG12 ILE X  88     149.956 151.068 221.069  1.00  0.00           H
ATOM   1414 HG13 ILE X  88     150.029 150.443 219.514  1.00  0.00           H
ATOM   1415  CD1 ILE X  88     150.817 152.319 219.595  1.00  0.00           C
ATOM   1416 HD11 ILE X  88     150.679 153.329 219.980  1.00  0.00           H
ATOM   1417 HD12 ILE X  88     151.068 152.429 218.540  1.00  0.00           H
ATOM   1418 HD13 ILE X  88     151.743 151.907 219.997  1.00  0.00           H
ATOM   1419  C   ILE X  88     145.948 150.828 219.769  1.00  0.00           C
ATOM   1420  O   ILE X  88     145.440 150.171 220.676  1.00  0.00           O
ATOM   1421  N   ASP X  89     145.201 151.419 218.890  1.00  0.00           N
ATOM   1422  H   ASP X  89     145.657 151.886 218.120  1.00  0.00           H
ATOM   1423  CA  ASP X  89     143.720 151.368 218.950  1.00  0.00           C
ATOM   1424  HA  ASP X  89     143.491 151.614 219.987  1.00  0.00           H
ATOM   1425  CB  ASP X  89     143.170 152.434 217.972  1.00  0.00           C
ATOM   1426  HB2 ASP X  89     143.879 153.256 217.876  1.00  0.00           H
ATOM   1427  HB3 ASP X  89     143.073 152.065 216.951  1.00  0.00           H
ATOM   1428  CG  ASP X  89     141.844 153.025 218.456  1.00  0.00           C
ATOM   1429  OD1 ASP X  89     141.428 154.053 217.972  1.00  0.00           O
ATOM   1430  OD2 ASP X  89     141.167 152.434 219.337  1.00  0.00           O
ATOM   1431  C   ASP X  89     143.182 149.935 218.639  1.00  0.00           C
ATOM   1432  O   ASP X  89     142.188 149.485 219.179  1.00  0.00           O
ATOM   1433  N   LEU X  90     143.736 149.321 217.609  1.00  0.00           N
ATOM   1434  H   LEU X  90     144.404 149.792 217.015  1.00  0.00           H
ATOM   1435  CA  LEU X  90     143.146 148.112 216.931  1.00  0.00           C
ATOM   1436  HA  LEU X  90     142.085 147.993 217.151  1.00  0.00           H
ATOM   1437  CB  LEU X  90     143.242 148.249 215.427  1.00  0.00           C
ATOM   1438  HB2 LEU X  90     144.252 148.560 215.159  1.00  0.00           H
ATOM   1439  HB3 LEU X  90     142.932 147.283 215.030  1.00  0.00           H
ATOM   1440  CG  LEU X  90     142.127 149.278 215.011  1.00  0.00           C
ATOM   1441  HG  LEU X  90     142.082 149.970 215.852  1.00  0.00           H
ATOM   1442  CD1 LEU X  90     142.500 150.026 213.728  1.00  0.00           C
ATOM   1443 HD11 LEU X  90     143.578 150.183 213.699  1.00  0.00           H
ATOM   1444 HD12 LEU X  90     141.946 150.965 213.760  1.00  0.00           H
ATOM   1445 HD13 LEU X  90     142.144 149.452 212.872  1.00  0.00           H
ATOM   1446  CD2 LEU X  90     140.723 148.775 214.857  1.00  0.00           C
ATOM   1447 HD21 LEU X  90     140.291 148.207 215.680  1.00  0.00           H
ATOM   1448 HD22 LEU X  90     140.075 149.649 214.788  1.00  0.00           H
ATOM   1449 HD23 LEU X  90     140.686 148.258 213.898  1.00  0.00           H
ATOM   1450  C   LEU X  90     143.889 146.865 217.298  1.00  0.00           C
ATOM   1451  O   LEU X  90     143.685 145.776 216.691  1.00  0.00           O
ATOM   1452  N   GLY X  91     144.799 146.935 218.294  1.00  0.00           N
ATOM   1453  H   GLY X  91     144.815 147.801 218.813  1.00  0.00           H
ATOM   1454  CA  GLY X  91     145.967 146.096 218.278  1.00  0.00           C
ATOM   1455  HA2 GLY X  91     146.605 146.140 217.395  1.00  0.00           H
ATOM   1456  HA3 GLY X  91     146.619 146.435 219.083  1.00  0.00           H
ATOM   1457  C   GLY X  91     145.708 144.637 218.618  1.00  0.00           C
ATOM   1458  O   GLY X  91     146.421 143.781 218.158  1.00  0.00           O
ATOM   1459  N   GLU X  92     144.606 144.340 219.343  1.00  0.00           N
ATOM   1460  H   GLU X  92     144.188 145.118 219.833  1.00  0.00           H
ATOM   1461  CA  GLU X  92     144.146 142.994 219.695  1.00  0.00           C
ATOM   1462  HA  GLU X  92     144.975 142.457 220.155  1.00  0.00           H
ATOM   1463  CB  GLU X  92     143.103 143.212 220.809  1.00  0.00           C
ATOM   1464  HB2 GLU X  92     143.445 143.656 221.744  1.00  0.00           H
ATOM   1465  HB3 GLU X  92     142.254 143.824 220.503  1.00  0.00           H
ATOM   1466  CG  GLU X  92     142.431 141.865 221.239  1.00  0.00           C
ATOM   1467  HG2 GLU X  92     141.758 142.092 222.066  1.00  0.00           H
ATOM   1468  HG3 GLU X  92     141.891 141.539 220.349  1.00  0.00           H
ATOM   1469  CD  GLU X  92     143.279 140.801 221.740  1.00  0.00           C
ATOM   1470  OE1 GLU X  92     144.407 140.973 222.206  1.00  0.00           O
ATOM   1471  OE2 GLU X  92     142.984 139.624 221.481  1.00  0.00           O
ATOM   1472  C   GLU X  92     143.526 142.238 218.505  1.00  0.00           C
ATOM   1473  O   GLU X  92     143.792 141.070 218.226  1.00  0.00           O
ATOM   1474  N   GLU X  93     142.770 142.875 217.584  1.00  0.00           N
ATOM   1475  H   GLU X  93     142.747 143.881 217.670  1.00  0.00           H
ATOM   1476  CA  GLU X  93     142.297 142.262 216.339  1.00  0.00           C
ATOM   1477  HA  GLU X  93     141.916 141.250 216.478  1.00  0.00           H
ATOM   1478  CB  GLU X  93     141.201 143.164 215.751  1.00  0.00           C
ATOM   1479  HB2 GLU X  93     140.347 143.092 216.424  1.00  0.00           H
ATOM   1480  HB3 GLU X  93     141.491 144.215 215.778  1.00  0.00           H
ATOM   1481  CG  GLU X  93     140.616 142.962 214.413  1.00  0.00           C
ATOM   1482  HG2 GLU X  93     139.696 143.546 214.427  1.00  0.00           H
ATOM   1483  HG3 GLU X  93     141.267 143.308 213.610  1.00  0.00           H
ATOM   1484  CD  GLU X  93     140.121 141.507 214.180  1.00  0.00           C
ATOM   1485  OE1 GLU X  93     140.159 141.067 213.029  1.00  0.00           O
ATOM   1486  OE2 GLU X  93     139.576 140.819 215.118  1.00  0.00           O
ATOM   1487  C   GLU X  93     143.620 142.125 215.524  1.00  0.00           C
ATOM   1488  O   GLU X  93     143.971 140.990 215.038  1.00  0.00           O
ATOM   1489  N   PHE X  94     144.423 143.192 215.454  1.00  0.00           N
ATOM   1490  H   PHE X  94     144.117 144.086 215.810  1.00  0.00           H
ATOM   1491  CA  PHE X  94     145.641 143.232 214.568  1.00  0.00           C
ATOM   1492  HA  PHE X  94     145.341 142.849 213.593  1.00  0.00           H
ATOM   1493  CB  PHE X  94     145.987 144.688 214.381  1.00  0.00           C
ATOM   1494  HB2 PHE X  94     145.995 145.290 215.290  1.00  0.00           H
ATOM   1495  HB3 PHE X  94     147.031 144.632 214.072  1.00  0.00           H
ATOM   1496  CG  PHE X  94     145.195 145.382 213.375  1.00  0.00           C
ATOM   1497  CD1 PHE X  94     143.831 145.416 213.395  1.00  0.00           C
ATOM   1498  HD1 PHE X  94     143.195 144.874 214.079  1.00  0.00           H
ATOM   1499  CE1 PHE X  94     143.097 146.178 212.430  1.00  0.00           C
ATOM   1500  HE1 PHE X  94     142.023 146.175 212.542  1.00  0.00           H
ATOM   1501  CZ  PHE X  94     143.769 147.062 211.507  1.00  0.00           C
ATOM   1502  HZ  PHE X  94     143.182 147.686 210.850  1.00  0.00           H
ATOM   1503  CE2 PHE X  94     145.177 147.018 211.523  1.00  0.00           C
ATOM   1504  HE2 PHE X  94     145.702 147.524 210.726  1.00  0.00           H
ATOM   1505  CD2 PHE X  94     145.880 146.210 212.409  1.00  0.00           C
ATOM   1506  HD2 PHE X  94     146.949 146.141 212.267  1.00  0.00           H
ATOM   1507  C   PHE X  94     146.830 142.362 215.138  1.00  0.00           C
ATOM   1508  O   PHE X  94     147.870 142.247 214.471  1.00  0.00           O
ATOM   1509  N   SER X  95     146.613 141.525 216.179  1.00  0.00           N
ATOM   1510  H   SER X  95     145.777 141.523 216.746  1.00  0.00           H
ATOM   1511  CA  SER X  95     147.658 140.643 216.738  1.00  0.00           C
ATOM   1512  HA  SER X  95     148.597 141.197 216.766  1.00  0.00           H
ATOM   1513  CB  SER X  95     147.336 140.438 218.195  1.00  0.00           C
ATOM   1514  HB2 SER X  95     148.189 139.860 218.550  1.00  0.00           H
ATOM   1515  HB3 SER X  95     147.404 141.379 218.740  1.00  0.00           H
ATOM   1516  OG  SER X  95     146.178 139.632 218.422  1.00  0.00           O
ATOM   1517  HG  SER X  95     145.372 140.112 218.623  1.00  0.00           H
ATOM   1518  C   SER X  95     147.788 139.301 215.978  1.00  0.00           C
ATOM   1519  O   SER X  95     148.782 138.594 216.060  1.00  0.00           O
ATOM   1520  N   GLY X  96     146.698 139.032 215.244  1.00  0.00           N
ATOM   1521  H   GLY X  96     145.939 139.698 215.264  1.00  0.00           H
ATOM   1522  CA  GLY X  96     146.607 137.859 214.397  1.00  0.00           C
ATOM   1523  HA2 GLY X  96     146.452 137.020 215.076  1.00  0.00           H
ATOM   1524  HA3 GLY X  96     145.689 137.870 213.809  1.00  0.00           H
ATOM   1525  C   GLY X  96     147.816 137.722 213.486  1.00  0.00           C
ATOM   1526  O   GLY X  96     148.328 138.744 212.983  1.00  0.00           O
ATOM   1527  N   ARG X  97     148.262 136.546 213.309  1.00  0.00           N
ATOM   1528  H   ARG X  97     147.889 135.716 213.748  1.00  0.00           H
ATOM   1529  CA  ARG X  97     149.167 136.096 212.280  1.00  0.00           C
ATOM   1530  HA  ARG X  97     149.747 136.904 211.835  1.00  0.00           H
ATOM   1531  CB  ARG X  97     150.243 135.108 212.866  1.00  0.00           C
ATOM   1532  HB2 ARG X  97     149.712 134.295 213.360  1.00  0.00           H
ATOM   1533  HB3 ARG X  97     150.822 134.653 212.062  1.00  0.00           H
ATOM   1534  CG  ARG X  97     151.303 135.697 213.824  1.00  0.00           C
ATOM   1535  HG2 ARG X  97     150.745 136.113 214.663  1.00  0.00           H
ATOM   1536  HG3 ARG X  97     152.000 134.892 214.058  1.00  0.00           H
ATOM   1537  CD  ARG X  97     152.090 136.923 213.206  1.00  0.00           C
ATOM   1538  HD2 ARG X  97     152.431 136.627 212.214  1.00  0.00           H
ATOM   1539  HD3 ARG X  97     151.522 137.840 213.046  1.00  0.00           H
ATOM   1540  NE  ARG X  97     153.255 137.259 213.966  1.00  0.00           N
ATOM   1541  HE  ARG X  97     153.658 136.489 214.481  1.00  0.00           H
ATOM   1542  CZ  ARG X  97     154.013 138.336 213.896  1.00  0.00           C
ATOM   1543  NH1 ARG X  97     153.736 139.341 213.034  1.00  0.00           N
ATOM   1544 HH11 ARG X  97     153.084 139.127 212.293  1.00  0.00           H
ATOM   1545 HH12 ARG X  97     154.413 140.090 213.081  1.00  0.00           H
ATOM   1546  NH2 ARG X  97     155.140 138.533 214.543  1.00  0.00           N
ATOM   1547 HH21 ARG X  97     155.488 137.758 215.090  1.00  0.00           H
ATOM   1548 HH22 ARG X  97     155.527 139.458 214.665  1.00  0.00           H
ATOM   1549  C   ARG X  97     148.355 135.308 211.211  1.00  0.00           C
ATOM   1550  O   ARG X  97     147.252 134.833 211.464  1.00  0.00           O
ATOM   1551  N   GLY X  98     148.920 135.262 210.013  1.00  0.00           N
ATOM   1552  H   GLY X  98     149.803 135.716 209.829  1.00  0.00           H
ATOM   1553  CA  GLY X  98     148.179 134.618 208.895  1.00  0.00           C
ATOM   1554  HA2 GLY X  98     147.101 134.596 209.057  1.00  0.00           H
ATOM   1555  HA3 GLY X  98     148.370 135.245 208.024  1.00  0.00           H
ATOM   1556  C   GLY X  98     148.738 133.134 208.624  1.00  0.00           C
ATOM   1557  O   GLY X  98     149.813 132.816 209.133  1.00  0.00           O
ATOM   1558  N   HIP X  99     148.035 132.306 207.875  1.00  0.00           N
ATOM   1559  H   HIP X  99     147.265 132.649 207.319  1.00  0.00           H
ATOM   1560  CA  HIP X  99     148.440 131.010 207.372  1.00  0.00           C
ATOM   1561  HA  HIP X  99     148.635 130.508 208.320  1.00  0.00           H
ATOM   1562  CB  HIP X  99     147.145 130.302 206.747  1.00  0.00           C
ATOM   1563  HB2 HIP X  99     146.826 130.904 205.896  1.00  0.00           H
ATOM   1564  HB3 HIP X  99     147.341 129.336 206.282  1.00  0.00           H
ATOM   1565  CG  HIP X  99     145.975 130.364 207.705  1.00  0.00           C
ATOM   1566  ND1 HIP X  99     146.077 129.800 208.942  1.00  0.00           N
ATOM   1567  HD1 HIP X  99     146.928 129.435 209.345  1.00  0.00           H
ATOM   1568  CE1 HIP X  99     144.841 129.697 209.420  1.00  0.00           C
ATOM   1569  HE1 HIP X  99     144.741 129.016 210.253  1.00  0.00           H
ATOM   1570  NE2 HIP X  99     143.957 130.213 208.553  1.00  0.00           N
ATOM   1571  HE2 HIP X  99     142.951 130.188 208.643  1.00  0.00           H
ATOM   1572  CD2 HIP X  99     144.635 130.636 207.455  1.00  0.00           C
ATOM   1573  HD2 HIP X  99     144.285 131.240 206.630  1.00  0.00           H
ATOM   1574  C   HIP X  99     149.656 131.017 206.463  1.00  0.00           C
ATOM   1575  O   HIP X  99     149.513 130.455 205.349  1.00  0.00           O
ATOM   1576  N   PHE X 100     150.832 131.532 206.819  1.00  0.00           N
ATOM   1577  H   PHE X 100     150.832 132.077 207.669  1.00  0.00           H
ATOM   1578  CA  PHE X 100     151.917 131.738 205.962  1.00  0.00           C
ATOM   1579  HA  PHE X 100     151.757 132.191 204.984  1.00  0.00           H
ATOM   1580  CB  PHE X 100     152.951 132.713 206.612  1.00  0.00           C
ATOM   1581  HB2 PHE X 100     152.502 133.706 206.588  1.00  0.00           H
ATOM   1582  HB3 PHE X 100     153.145 132.338 207.617  1.00  0.00           H
ATOM   1583  CG  PHE X 100     154.269 132.835 205.783  1.00  0.00           C
ATOM   1584  CD1 PHE X 100     154.443 133.722 204.731  1.00  0.00           C
ATOM   1585  HD1 PHE X 100     153.662 134.382 204.383  1.00  0.00           H
ATOM   1586  CE1 PHE X 100     155.786 133.892 204.145  1.00  0.00           C
ATOM   1587  HE1 PHE X 100     155.855 134.571 203.308  1.00  0.00           H
ATOM   1588  CZ  PHE X 100     156.895 133.184 204.644  1.00  0.00           C
ATOM   1589  HZ  PHE X 100     157.880 133.279 204.211  1.00  0.00           H
ATOM   1590  CE2 PHE X 100     156.612 132.281 205.690  1.00  0.00           C
ATOM   1591  HE2 PHE X 100     157.454 131.710 206.055  1.00  0.00           H
ATOM   1592  CD2 PHE X 100     155.375 132.110 206.244  1.00  0.00           C
ATOM   1593  HD2 PHE X 100     155.302 131.510 207.139  1.00  0.00           H
ATOM   1594  C   PHE X 100     152.555 130.326 205.747  1.00  0.00           C
ATOM   1595  O   PHE X 100     152.756 129.589 206.696  1.00  0.00           O
ATOM   1596  N   PRO X 101     152.775 129.834 204.482  1.00  0.00           N
ATOM   1597  CD  PRO X 101     152.547 130.552 203.249  1.00  0.00           C
ATOM   1598  HD2 PRO X 101     153.425 131.107 202.920  1.00  0.00           H
ATOM   1599  HD3 PRO X 101     151.666 131.194 203.246  1.00  0.00           H
ATOM   1600  CG  PRO X 101     152.285 129.504 202.165  1.00  0.00           C
ATOM   1601  HG2 PRO X 101     152.764 129.810 201.234  1.00  0.00           H
ATOM   1602  HG3 PRO X 101     151.219 129.280 202.140  1.00  0.00           H
ATOM   1603  CB  PRO X 101     152.935 128.285 202.647  1.00  0.00           C
ATOM   1604  HB2 PRO X 101     153.968 128.181 202.317  1.00  0.00           H
ATOM   1605  HB3 PRO X 101     152.265 127.498 202.301  1.00  0.00           H
ATOM   1606  CA  PRO X 101     152.823 128.364 204.203  1.00  0.00           C
ATOM   1607  HA  PRO X 101     151.868 127.947 204.521  1.00  0.00           H
ATOM   1608  C   PRO X 101     153.998 127.619 204.729  1.00  0.00           C
ATOM   1609  O   PRO X 101     153.808 126.529 205.253  1.00  0.00           O
ATOM   1610  N   LEU X 102     155.216 128.094 204.678  1.00  0.00           N
ATOM   1611  H   LEU X 102     155.265 128.990 204.215  1.00  0.00           H
ATOM   1612  CA  LEU X 102     156.367 127.540 205.286  1.00  0.00           C
ATOM   1613  HA  LEU X 102     156.272 126.462 205.156  1.00  0.00           H
ATOM   1614  CB  LEU X 102     157.590 128.194 204.605  1.00  0.00           C
ATOM   1615  HB2 LEU X 102     157.464 128.091 203.527  1.00  0.00           H
ATOM   1616  HB3 LEU X 102     157.732 129.243 204.863  1.00  0.00           H
ATOM   1617  CG  LEU X 102     158.970 127.527 204.950  1.00  0.00           C
ATOM   1618  HG  LEU X 102     159.376 127.856 205.907  1.00  0.00           H
ATOM   1619  CD1 LEU X 102     158.816 126.007 205.003  1.00  0.00           C
ATOM   1620 HD11 LEU X 102     159.807 125.584 205.172  1.00  0.00           H
ATOM   1621 HD12 LEU X 102     158.560 125.552 204.046  1.00  0.00           H
ATOM   1622 HD13 LEU X 102     158.229 125.619 205.835  1.00  0.00           H
ATOM   1623  CD2 LEU X 102     159.929 127.814 203.820  1.00  0.00           C
ATOM   1624 HD21 LEU X 102     160.191 128.872 203.807  1.00  0.00           H
ATOM   1625 HD22 LEU X 102     160.852 127.273 204.028  1.00  0.00           H
ATOM   1626 HD23 LEU X 102     159.453 127.569 202.870  1.00  0.00           H
ATOM   1627  C   LEU X 102     156.369 127.635 206.862  1.00  0.00           C
ATOM   1628  O   LEU X 102     156.753 126.731 207.585  1.00  0.00           O
ATOM   1629  N   ALA X 103     155.709 128.658 207.443  1.00  0.00           N
ATOM   1630  H   ALA X 103     155.298 129.358 206.840  1.00  0.00           H
ATOM   1631  CA  ALA X 103     155.335 128.634 208.838  1.00  0.00           C
ATOM   1632  HA  ALA X 103     156.261 128.582 209.411  1.00  0.00           H
ATOM   1633  CB  ALA X 103     154.834 130.019 209.228  1.00  0.00           C
ATOM   1634  HB1 ALA X 103     154.069 130.276 208.495  1.00  0.00           H
ATOM   1635  HB2 ALA X 103     155.600 130.791 209.294  1.00  0.00           H
ATOM   1636  HB3 ALA X 103     154.435 129.994 210.242  1.00  0.00           H
ATOM   1637  C   ALA X 103     154.418 127.530 209.158  1.00  0.00           C
ATOM   1638  O   ALA X 103     154.864 126.781 210.020  1.00  0.00           O
ATOM   1639  N   GLU X 104     153.314 127.371 208.464  1.00  0.00           N
ATOM   1640  H   GLU X 104     153.097 128.137 207.843  1.00  0.00           H
ATOM   1641  CA  GLU X 104     152.340 126.302 208.822  1.00  0.00           C
ATOM   1642  HA  GLU X 104     152.254 126.330 209.908  1.00  0.00           H
ATOM   1643  CB  GLU X 104     150.957 126.473 208.140  1.00  0.00           C
ATOM   1644  HB2 GLU X 104     151.050 126.322 207.064  1.00  0.00           H
ATOM   1645  HB3 GLU X 104     150.314 125.669 208.498  1.00  0.00           H
ATOM   1646  CG  GLU X 104     150.368 127.873 208.446  1.00  0.00           C
ATOM   1647  HG2 GLU X 104     151.063 128.669 208.179  1.00  0.00           H
ATOM   1648  HG3 GLU X 104     149.622 127.993 207.660  1.00  0.00           H
ATOM   1649  CD  GLU X 104     149.729 128.171 209.765  1.00  0.00           C
ATOM   1650  OE1 GLU X 104     150.248 127.741 210.818  1.00  0.00           O
ATOM   1651  OE2 GLU X 104     148.614 128.713 209.727  1.00  0.00           O
ATOM   1652  C   GLU X 104     152.872 124.951 208.526  1.00  0.00           C
ATOM   1653  O   GLU X 104     152.507 124.051 209.250  1.00  0.00           O
ATOM   1654  N   ARG X 105     153.762 124.719 207.506  1.00  0.00           N
ATOM   1655  H   ARG X 105     154.017 125.468 206.878  1.00  0.00           H
ATOM   1656  CA  ARG X 105     154.520 123.489 207.396  1.00  0.00           C
ATOM   1657  HA  ARG X 105     153.803 122.669 207.431  1.00  0.00           H
ATOM   1658  CB  ARG X 105     155.371 123.373 206.119  1.00  0.00           C
ATOM   1659  HB2 ARG X 105     156.133 124.149 206.192  1.00  0.00           H
ATOM   1660  HB3 ARG X 105     155.903 122.423 206.163  1.00  0.00           H
ATOM   1661  CG  ARG X 105     154.720 123.520 204.704  1.00  0.00           C
ATOM   1662  HG2 ARG X 105     154.686 124.587 204.484  1.00  0.00           H
ATOM   1663  HG3 ARG X 105     155.234 123.073 203.853  1.00  0.00           H
ATOM   1664  CD  ARG X 105     153.355 122.871 204.649  1.00  0.00           C
ATOM   1665  HD2 ARG X 105     153.493 121.794 204.751  1.00  0.00           H
ATOM   1666  HD3 ARG X 105     152.678 123.272 205.403  1.00  0.00           H
ATOM   1667  NE  ARG X 105     152.763 123.248 203.375  1.00  0.00           N
ATOM   1668  HE  ARG X 105     152.842 122.565 202.635  1.00  0.00           H
ATOM   1669  CZ  ARG X 105     151.906 124.208 203.115  1.00  0.00           C
ATOM   1670  NH1 ARG X 105     151.676 125.228 203.936  1.00  0.00           N
ATOM   1671 HH11 ARG X 105     152.244 125.460 204.738  1.00  0.00           H
ATOM   1672 HH12 ARG X 105     151.088 126.024 203.734  1.00  0.00           H
ATOM   1673  NH2 ARG X 105     151.333 124.207 202.013  1.00  0.00           N
ATOM   1674 HH21 ARG X 105     151.465 123.363 201.473  1.00  0.00           H
ATOM   1675 HH22 ARG X 105     150.568 124.855 201.893  1.00  0.00           H
ATOM   1676  C   ARG X 105     155.459 123.326 208.577  1.00  0.00           C
ATOM   1677  O   ARG X 105     155.401 122.183 209.116  1.00  0.00           O
ATOM   1678  N   ALA X 106     156.344 124.298 208.879  1.00  0.00           N
ATOM   1679  H   ALA X 106     156.330 125.148 208.333  1.00  0.00           H
ATOM   1680  CA  ALA X 106     157.386 124.107 209.911  1.00  0.00           C
ATOM   1681  HA  ALA X 106     157.722 123.072 209.970  1.00  0.00           H
ATOM   1682  CB  ALA X 106     158.580 125.036 209.452  1.00  0.00           C
ATOM   1683  HB1 ALA X 106     158.284 126.083 209.514  1.00  0.00           H
ATOM   1684  HB2 ALA X 106     158.836 124.828 208.413  1.00  0.00           H
ATOM   1685  HB3 ALA X 106     159.437 124.872 210.106  1.00  0.00           H
ATOM   1686  C   ALA X 106     156.920 124.548 211.393  1.00  0.00           C
ATOM   1687  O   ALA X 106     156.724 123.738 212.259  1.00  0.00           O
ATOM   1688  N   ASN X 107     156.728 125.835 211.711  1.00  0.00           N
ATOM   1689  H   ASN X 107     156.732 126.526 210.975  1.00  0.00           H
ATOM   1690  CA  ASN X 107     156.157 126.297 212.985  1.00  0.00           C
ATOM   1691  HA  ASN X 107     156.862 125.974 213.751  1.00  0.00           H
ATOM   1692  CB  ASN X 107     156.120 127.810 213.059  1.00  0.00           C
ATOM   1693  HB2 ASN X 107     155.501 128.208 212.255  1.00  0.00           H
ATOM   1694  HB3 ASN X 107     155.679 128.103 214.012  1.00  0.00           H
ATOM   1695  CG  ASN X 107     157.467 128.447 212.923  1.00  0.00           C
ATOM   1696  OD1 ASN X 107     158.117 128.391 211.875  1.00  0.00           O
ATOM   1697  ND2 ASN X 107     157.967 129.086 213.944  1.00  0.00           N
ATOM   1698 HD21 ASN X 107     157.314 129.575 214.539  1.00  0.00           H
ATOM   1699 HD22 ASN X 107     158.923 129.408 213.990  1.00  0.00           H
ATOM   1700  C   ASN X 107     154.777 125.694 213.305  1.00  0.00           C
ATOM   1701  O   ASN X 107     154.481 125.602 214.478  1.00  0.00           O
ATOM   1702  N   ARG X 108     153.974 125.499 212.287  1.00  0.00           N
ATOM   1703  H   ARG X 108     154.373 125.688 211.379  1.00  0.00           H
ATOM   1704  CA  ARG X 108     152.734 124.637 212.305  1.00  0.00           C
ATOM   1705  HA  ARG X 108     152.224 124.943 211.392  1.00  0.00           H
ATOM   1706  CB  ARG X 108     152.979 123.162 212.092  1.00  0.00           C
ATOM   1707  HB2 ARG X 108     152.038 122.612 212.091  1.00  0.00           H
ATOM   1708  HB3 ARG X 108     153.500 122.964 211.155  1.00  0.00           H
ATOM   1709  CG  ARG X 108     153.729 122.528 213.279  1.00  0.00           C
ATOM   1710  HG2 ARG X 108     154.633 123.084 213.529  1.00  0.00           H
ATOM   1711  HG3 ARG X 108     153.221 122.664 214.234  1.00  0.00           H
ATOM   1712  CD  ARG X 108     153.994 121.060 213.076  1.00  0.00           C
ATOM   1713  HD2 ARG X 108     154.536 120.693 213.948  1.00  0.00           H
ATOM   1714  HD3 ARG X 108     153.003 120.614 213.166  1.00  0.00           H
ATOM   1715  NE  ARG X 108     154.666 120.766 211.779  1.00  0.00           N
ATOM   1716  HE  ARG X 108     154.693 121.491 211.076  1.00  0.00           H
ATOM   1717  CZ  ARG X 108     155.116 119.619 211.428  1.00  0.00           C
ATOM   1718  NH1 ARG X 108     154.951 118.550 212.115  1.00  0.00           N
ATOM   1719 HH11 ARG X 108     154.649 118.589 213.078  1.00  0.00           H
ATOM   1720 HH12 ARG X 108     155.355 117.678 211.804  1.00  0.00           H
ATOM   1721  NH2 ARG X 108     155.757 119.563 210.320  1.00  0.00           N
ATOM   1722 HH21 ARG X 108     155.894 120.359 209.715  1.00  0.00           H
ATOM   1723 HH22 ARG X 108     156.095 118.665 210.004  1.00  0.00           H
ATOM   1724  C   ARG X 108     151.761 124.953 213.442  1.00  0.00           C
ATOM   1725  O   ARG X 108     151.030 124.016 213.857  1.00  0.00           O
ATOM   1726  N   GLY X 109     151.774 126.195 213.930  1.00  0.00           N
ATOM   1727  H   GLY X 109     152.360 126.868 213.457  1.00  0.00           H
ATOM   1728  CA  GLY X 109     150.843 126.665 214.913  1.00  0.00           C
ATOM   1729  HA2 GLY X 109     150.655 127.720 214.711  1.00  0.00           H
ATOM   1730  HA3 GLY X 109     149.900 126.120 214.865  1.00  0.00           H
ATOM   1731  C   GLY X 109     151.429 126.574 216.357  1.00  0.00           C
ATOM   1732  O   GLY X 109     150.639 126.469 217.261  1.00  0.00           O
ATOM   1733  N   PHE X 110     152.791 126.414 216.558  1.00  0.00           N
ATOM   1734  H   PHE X 110     153.381 126.471 215.739  1.00  0.00           H
ATOM   1735  CA  PHE X 110     153.441 126.334 217.849  1.00  0.00           C
ATOM   1736  HA  PHE X 110     152.764 126.392 218.701  1.00  0.00           H
ATOM   1737  CB  PHE X 110     154.181 125.002 218.087  1.00  0.00           C
ATOM   1738  HB2 PHE X 110     155.055 124.947 217.436  1.00  0.00           H
ATOM   1739  HB3 PHE X 110     154.526 125.027 219.120  1.00  0.00           H
ATOM   1740  CG  PHE X 110     153.326 123.712 217.899  1.00  0.00           C
ATOM   1741  CD1 PHE X 110     152.298 123.341 218.878  1.00  0.00           C
ATOM   1742  HD1 PHE X 110     152.078 124.067 219.646  1.00  0.00           H
ATOM   1743  CE1 PHE X 110     151.809 122.000 218.913  1.00  0.00           C
ATOM   1744  HE1 PHE X 110     151.174 121.716 219.739  1.00  0.00           H
ATOM   1745  CZ  PHE X 110     152.310 121.055 218.020  1.00  0.00           C
ATOM   1746  HZ  PHE X 110     151.871 120.069 218.042  1.00  0.00           H
ATOM   1747  CE2 PHE X 110     153.308 121.442 217.058  1.00  0.00           C
ATOM   1748  HE2 PHE X 110     153.622 120.726 216.314  1.00  0.00           H
ATOM   1749  CD2 PHE X 110     153.881 122.711 217.112  1.00  0.00           C
ATOM   1750  HD2 PHE X 110     154.706 122.965 216.462  1.00  0.00           H
ATOM   1751  C   PHE X 110     154.564 127.419 217.858  1.00  0.00           C
ATOM   1752  O   PHE X 110     154.894 127.989 216.811  1.00  0.00           O
ATOM   1753  N   GLY X 111     155.227 127.562 218.996  1.00  0.00           N
ATOM   1754  H   GLY X 111     154.734 127.259 219.824  1.00  0.00           H
ATOM   1755  CA  GLY X 111     156.275 128.487 219.375  1.00  0.00           C
ATOM   1756  HA2 GLY X 111     156.620 128.225 220.375  1.00  0.00           H
ATOM   1757  HA3 GLY X 111     157.048 128.391 218.612  1.00  0.00           H
ATOM   1758  C   GLY X 111     155.657 129.885 219.454  1.00  0.00           C
ATOM   1759  O   GLY X 111     154.547 130.023 220.002  1.00  0.00           O
ATOM   1760  N   ILE X 112     156.348 130.884 218.981  1.00  0.00           N
ATOM   1761  H   ILE X 112     157.155 130.596 218.446  1.00  0.00           H
ATOM   1762  CA  ILE X 112     156.000 132.282 219.244  1.00  0.00           C
ATOM   1763  HA  ILE X 112     155.078 132.285 219.825  1.00  0.00           H
ATOM   1764  CB  ILE X 112     157.031 133.005 220.055  1.00  0.00           C
ATOM   1765  HB  ILE X 112     157.895 133.086 219.395  1.00  0.00           H
ATOM   1766  CG2 ILE X 112     156.678 134.438 220.481  1.00  0.00           C
ATOM   1767 HG21 ILE X 112     156.355 135.092 219.671  1.00  0.00           H
ATOM   1768 HG22 ILE X 112     157.541 134.979 220.868  1.00  0.00           H
ATOM   1769 HG23 ILE X 112     155.900 134.283 221.229  1.00  0.00           H
ATOM   1770  CG1 ILE X 112     157.376 132.142 221.273  1.00  0.00           C
ATOM   1771 HG12 ILE X 112     156.624 132.088 222.060  1.00  0.00           H
ATOM   1772 HG13 ILE X 112     157.530 131.093 221.019  1.00  0.00           H
ATOM   1773  CD1 ILE X 112     158.629 132.742 221.999  1.00  0.00           C
ATOM   1774 HD11 ILE X 112     158.874 132.031 222.788  1.00  0.00           H
ATOM   1775 HD12 ILE X 112     158.464 133.727 222.437  1.00  0.00           H
ATOM   1776 HD13 ILE X 112     159.512 132.689 221.362  1.00  0.00           H
ATOM   1777  C   ILE X 112     155.641 133.061 217.940  1.00  0.00           C
ATOM   1778  O   ILE X 112     154.463 133.305 217.606  1.00  0.00           O
ATOM   1779  N   VAL X 113     156.655 133.333 217.127  1.00  0.00           N
ATOM   1780  H   VAL X 113     157.438 132.696 217.092  1.00  0.00           H
ATOM   1781  CA  VAL X 113     156.587 134.273 216.006  1.00  0.00           C
ATOM   1782  HA  VAL X 113     156.375 135.202 216.536  1.00  0.00           H
ATOM   1783  CB  VAL X 113     157.887 134.473 215.240  1.00  0.00           C
ATOM   1784  HB  VAL X 113     158.682 134.828 215.897  1.00  0.00           H
ATOM   1785  CG1 VAL X 113     158.341 133.223 214.540  1.00  0.00           C
ATOM   1786 HG11 VAL X 113     157.787 133.119 213.607  1.00  0.00           H
ATOM   1787 HG12 VAL X 113     159.404 133.322 214.318  1.00  0.00           H
ATOM   1788 HG13 VAL X 113     158.226 132.425 215.274  1.00  0.00           H
ATOM   1789  CG2 VAL X 113     157.804 135.640 214.193  1.00  0.00           C
ATOM   1790 HG21 VAL X 113     158.817 135.808 213.827  1.00  0.00           H
ATOM   1791 HG22 VAL X 113     157.676 136.573 214.742  1.00  0.00           H
ATOM   1792 HG23 VAL X 113     157.188 135.408 213.324  1.00  0.00           H
ATOM   1793  C   VAL X 113     155.425 134.103 215.011  1.00  0.00           C
ATOM   1794  O   VAL X 113     154.774 135.163 214.810  1.00  0.00           O
ATOM   1795  N   PHE X 114     155.089 132.929 214.530  1.00  0.00           N
ATOM   1796  H   PHE X 114     155.561 132.160 214.983  1.00  0.00           H
ATOM   1797  CA  PHE X 114     153.889 132.716 213.623  1.00  0.00           C
ATOM   1798  HA  PHE X 114     153.467 133.713 213.501  1.00  0.00           H
ATOM   1799  CB  PHE X 114     154.349 132.401 212.110  1.00  0.00           C
ATOM   1800  HB2 PHE X 114     154.948 131.491 212.074  1.00  0.00           H
ATOM   1801  HB3 PHE X 114     153.395 132.289 211.595  1.00  0.00           H
ATOM   1802  CG  PHE X 114     155.194 133.510 211.526  1.00  0.00           C
ATOM   1803  CD1 PHE X 114     156.527 133.275 211.135  1.00  0.00           C
ATOM   1804  HD1 PHE X 114     157.006 132.326 211.325  1.00  0.00           H
ATOM   1805  CE1 PHE X 114     157.315 134.299 210.541  1.00  0.00           C
ATOM   1806  HE1 PHE X 114     158.302 134.072 210.165  1.00  0.00           H
ATOM   1807  CZ  PHE X 114     156.816 135.558 210.332  1.00  0.00           C
ATOM   1808  HZ  PHE X 114     157.448 136.208 209.746  1.00  0.00           H
ATOM   1809  CE2 PHE X 114     155.457 135.801 210.721  1.00  0.00           C
ATOM   1810  HE2 PHE X 114     154.998 136.730 210.418  1.00  0.00           H
ATOM   1811  CD2 PHE X 114     154.649 134.812 211.308  1.00  0.00           C
ATOM   1812  HD2 PHE X 114     153.592 134.907 211.512  1.00  0.00           H
ATOM   1813  C   PHE X 114     152.792 131.754 214.169  1.00  0.00           C
ATOM   1814  O   PHE X 114     151.770 131.517 213.542  1.00  0.00           O
ATOM   1815  N   SER X 115     153.010 131.239 215.351  1.00  0.00           N
ATOM   1816  H   SER X 115     153.940 131.346 215.732  1.00  0.00           H
ATOM   1817  CA  SER X 115     151.922 130.755 216.174  1.00  0.00           C
ATOM   1818  HA  SER X 115     151.427 129.916 215.685  1.00  0.00           H
ATOM   1819  CB  SER X 115     152.445 130.285 217.489  1.00  0.00           C
ATOM   1820  HB2 SER X 115     153.233 129.596 217.184  1.00  0.00           H
ATOM   1821  HB3 SER X 115     152.913 131.117 218.015  1.00  0.00           H
ATOM   1822  OG  SER X 115     151.486 129.587 218.335  1.00  0.00           O
ATOM   1823  HG  SER X 115     151.770 129.537 219.250  1.00  0.00           H
ATOM   1824  C   SER X 115     150.890 131.849 216.580  1.00  0.00           C
ATOM   1825  O   SER X 115     151.184 133.050 216.521  1.00  0.00           O
ATOM   1826  N   ASN X 116     149.659 131.419 216.786  1.00  0.00           N
ATOM   1827  H   ASN X 116     149.526 130.422 216.686  1.00  0.00           H
ATOM   1828  CA  ASN X 116     148.437 132.256 216.783  1.00  0.00           C
ATOM   1829  HA  ASN X 116     148.789 133.288 216.805  1.00  0.00           H
ATOM   1830  CB  ASN X 116     147.720 131.954 215.478  1.00  0.00           C
ATOM   1831  HB2 ASN X 116     148.503 131.868 214.724  1.00  0.00           H
ATOM   1832  HB3 ASN X 116     147.109 131.059 215.587  1.00  0.00           H
ATOM   1833  CG  ASN X 116     146.846 133.130 215.042  1.00  0.00           C
ATOM   1834  OD1 ASN X 116     147.307 134.196 214.688  1.00  0.00           O
ATOM   1835  ND2 ASN X 116     145.547 132.965 215.286  1.00  0.00           N
ATOM   1836 HD21 ASN X 116     145.172 132.028 215.306  1.00  0.00           H
ATOM   1837 HD22 ASN X 116     144.953 133.763 215.111  1.00  0.00           H
ATOM   1838  C   ASN X 116     147.397 132.013 217.955  1.00  0.00           C
ATOM   1839  O   ASN X 116     147.294 130.884 218.473  1.00  0.00           O
ATOM   1840  N   GLY X 117     146.726 133.091 218.421  1.00  0.00           N
ATOM   1841  H   GLY X 117     147.092 133.975 218.097  1.00  0.00           H
ATOM   1842  CA  GLY X 117     145.672 133.045 219.406  1.00  0.00           C
ATOM   1843  HA2 GLY X 117     145.009 133.909 219.449  1.00  0.00           H
ATOM   1844  HA3 GLY X 117     144.910 132.377 219.002  1.00  0.00           H
ATOM   1845  C   GLY X 117     146.120 132.702 220.801  1.00  0.00           C
ATOM   1846  O   GLY X 117     147.190 133.092 221.235  1.00  0.00           O
ATOM   1847  N   LYS X 118     145.182 132.036 221.471  1.00  0.00           N
ATOM   1848  H   LYS X 118     144.267 131.865 221.079  1.00  0.00           H
ATOM   1849  CA  LYS X 118     145.453 131.595 222.878  1.00  0.00           C
ATOM   1850  HA  LYS X 118     145.528 132.435 223.568  1.00  0.00           H
ATOM   1851  CB  LYS X 118     144.340 130.602 223.385  1.00  0.00           C
ATOM   1852  HB2 LYS X 118     143.401 131.097 223.140  1.00  0.00           H
ATOM   1853  HB3 LYS X 118     144.459 129.671 222.831  1.00  0.00           H
ATOM   1854  CG  LYS X 118     144.466 130.092 224.871  1.00  0.00           C
ATOM   1855  HG2 LYS X 118     145.517 129.875 225.063  1.00  0.00           H
ATOM   1856  HG3 LYS X 118     144.148 130.861 225.575  1.00  0.00           H
ATOM   1857  CD  LYS X 118     143.587 128.885 225.209  1.00  0.00           C
ATOM   1858  HD2 LYS X 118     142.536 129.133 225.062  1.00  0.00           H
ATOM   1859  HD3 LYS X 118     143.787 128.033 224.559  1.00  0.00           H
ATOM   1860  CE  LYS X 118     143.928 128.423 226.623  1.00  0.00           C
ATOM   1861  HE2 LYS X 118     145.004 128.425 226.793  1.00  0.00           H
ATOM   1862  HE3 LYS X 118     143.555 129.032 227.447  1.00  0.00           H
ATOM   1863  NZ  LYS X 118     143.548 127.007 226.835  1.00  0.00           N
ATOM   1864  HZ1 LYS X 118     144.113 126.505 226.165  1.00  0.00           H
ATOM   1865  HZ2 LYS X 118     142.554 126.872 226.720  1.00  0.00           H
ATOM   1866  HZ3 LYS X 118     143.771 126.678 227.763  1.00  0.00           H
ATOM   1867  C   LYS X 118     146.774 130.900 222.891  1.00  0.00           C
ATOM   1868  O   LYS X 118     147.555 131.222 223.779  1.00  0.00           O
ATOM   1869  N   ARG X 119     146.990 129.870 222.047  1.00  0.00           N
ATOM   1870  H   ARG X 119     146.214 129.515 221.505  1.00  0.00           H
ATOM   1871  CA  ARG X 119     148.281 129.223 221.971  1.00  0.00           C
ATOM   1872  HA  ARG X 119     148.450 128.612 222.858  1.00  0.00           H
ATOM   1873  CB  ARG X 119     148.365 128.253 220.741  1.00  0.00           C
ATOM   1874  HB2 ARG X 119     147.383 127.779 220.745  1.00  0.00           H
ATOM   1875  HB3 ARG X 119     148.453 128.703 219.752  1.00  0.00           H
ATOM   1876  CG  ARG X 119     149.395 127.194 220.892  1.00  0.00           C
ATOM   1877  HG2 ARG X 119     150.336 127.577 220.496  1.00  0.00           H
ATOM   1878  HG3 ARG X 119     149.498 126.880 221.931  1.00  0.00           H
ATOM   1879  CD  ARG X 119     148.960 125.954 220.132  1.00  0.00           C
ATOM   1880  HD2 ARG X 119     148.587 126.305 219.170  1.00  0.00           H
ATOM   1881  HD3 ARG X 119     149.838 125.327 219.972  1.00  0.00           H
ATOM   1882  NE  ARG X 119     147.895 125.307 220.805  1.00  0.00           N
ATOM   1883  HE  ARG X 119     147.556 125.754 221.644  1.00  0.00           H
ATOM   1884  CZ  ARG X 119     147.429 124.127 220.689  1.00  0.00           C
ATOM   1885  NH1 ARG X 119     146.535 123.604 221.551  1.00  0.00           N
ATOM   1886 HH11 ARG X 119     146.516 124.175 222.383  1.00  0.00           H
ATOM   1887 HH12 ARG X 119     146.681 122.605 221.581  1.00  0.00           H
ATOM   1888  NH2 ARG X 119     147.907 123.395 219.748  1.00  0.00           N
ATOM   1889 HH21 ARG X 119     148.549 123.771 219.064  1.00  0.00           H
ATOM   1890 HH22 ARG X 119     147.486 122.484 219.642  1.00  0.00           H
ATOM   1891  C   ARG X 119     149.535 130.099 222.003  1.00  0.00           C
ATOM   1892  O   ARG X 119     150.527 129.760 222.662  1.00  0.00           O
ATOM   1893  N   TRP X 120     149.486 131.124 221.244  1.00  0.00           N
ATOM   1894  H   TRP X 120     148.710 131.332 220.631  1.00  0.00           H
ATOM   1895  CA  TRP X 120     150.537 132.187 221.323  1.00  0.00           C
ATOM   1896  HA  TRP X 120     151.537 131.753 221.331  1.00  0.00           H
ATOM   1897  CB  TRP X 120     150.346 133.030 220.111  1.00  0.00           C
ATOM   1898  HB2 TRP X 120     150.586 132.471 219.207  1.00  0.00           H
ATOM   1899  HB3 TRP X 120     149.311 133.302 219.901  1.00  0.00           H
ATOM   1900  CG  TRP X 120     151.073 134.337 220.189  1.00  0.00           C
ATOM   1901  CD1 TRP X 120     152.429 134.494 220.205  1.00  0.00           C
ATOM   1902  HD1 TRP X 120     153.170 133.712 220.136  1.00  0.00           H
ATOM   1903  NE1 TRP X 120     152.734 135.824 220.380  1.00  0.00           N
ATOM   1904  HE1 TRP X 120     153.627 136.204 220.098  1.00  0.00           H
ATOM   1905  CE2 TRP X 120     151.623 136.606 220.507  1.00  0.00           C
ATOM   1906  CZ2 TRP X 120     151.405 138.011 220.611  1.00  0.00           C
ATOM   1907  HZ2 TRP X 120     152.307 138.602 220.672  1.00  0.00           H
ATOM   1908  CH2 TRP X 120     150.064 138.411 220.597  1.00  0.00           C
ATOM   1909  HH2 TRP X 120     149.931 139.480 220.683  1.00  0.00           H
ATOM   1910  CZ3 TRP X 120     149.016 137.537 220.623  1.00  0.00           C
ATOM   1911  HZ3 TRP X 120     148.069 138.055 220.576  1.00  0.00           H
ATOM   1912  CE3 TRP X 120     149.255 136.153 220.472  1.00  0.00           C
ATOM   1913  HE3 TRP X 120     148.460 135.424 220.431  1.00  0.00           H
ATOM   1914  CD2 TRP X 120     150.542 135.668 220.392  1.00  0.00           C
ATOM   1915  C   TRP X 120     150.492 132.855 222.700  1.00  0.00           C
ATOM   1916  O   TRP X 120     151.459 132.793 223.436  1.00  0.00           O
ATOM   1917  N   LYS X 121     149.357 133.488 223.095  1.00  0.00           N
ATOM   1918  H   LYS X 121     148.552 133.475 222.484  1.00  0.00           H
ATOM   1919  CA  LYS X 121     149.235 134.292 224.332  1.00  0.00           C
ATOM   1920  HA  LYS X 121     149.746 135.254 224.360  1.00  0.00           H
ATOM   1921  CB  LYS X 121     147.766 134.603 224.560  1.00  0.00           C
ATOM   1922  HB2 LYS X 121     147.141 133.716 224.453  1.00  0.00           H
ATOM   1923  HB3 LYS X 121     147.627 135.009 225.562  1.00  0.00           H
ATOM   1924  CG  LYS X 121     147.370 135.677 223.562  1.00  0.00           C
ATOM   1925  HG2 LYS X 121     147.819 136.617 223.883  1.00  0.00           H
ATOM   1926  HG3 LYS X 121     147.675 135.462 222.538  1.00  0.00           H
ATOM   1927  CD  LYS X 121     145.832 135.879 223.388  1.00  0.00           C
ATOM   1928  HD2 LYS X 121     145.465 134.935 222.986  1.00  0.00           H
ATOM   1929  HD3 LYS X 121     145.436 136.076 224.384  1.00  0.00           H
ATOM   1930  CE  LYS X 121     145.504 137.021 222.493  1.00  0.00           C
ATOM   1931  HE2 LYS X 121     145.826 137.995 222.861  1.00  0.00           H
ATOM   1932  HE3 LYS X 121     145.894 136.961 221.477  1.00  0.00           H
ATOM   1933  NZ  LYS X 121     144.019 137.182 222.376  1.00  0.00           N
ATOM   1934  HZ1 LYS X 121     143.681 136.737 221.535  1.00  0.00           H
ATOM   1935  HZ2 LYS X 121     143.724 138.143 222.278  1.00  0.00           H
ATOM   1936  HZ3 LYS X 121     143.555 136.854 223.211  1.00  0.00           H
ATOM   1937  C   LYS X 121     149.735 133.644 225.612  1.00  0.00           C
ATOM   1938  O   LYS X 121     150.463 134.205 226.406  1.00  0.00           O
ATOM   1939  N   GLU X 122     149.284 132.420 225.916  1.00  0.00           N
ATOM   1940  H   GLU X 122     148.581 132.037 225.301  1.00  0.00           H
ATOM   1941  CA  GLU X 122     149.828 131.687 227.078  1.00  0.00           C
ATOM   1942  HA  GLU X 122     149.664 132.393 227.892  1.00  0.00           H
ATOM   1943  CB  GLU X 122     149.186 130.325 227.280  1.00  0.00           C
ATOM   1944  HB2 GLU X 122     149.436 129.573 226.532  1.00  0.00           H
ATOM   1945  HB3 GLU X 122     149.549 129.913 228.222  1.00  0.00           H
ATOM   1946  CG  GLU X 122     147.642 130.336 227.330  1.00  0.00           C
ATOM   1947  HG2 GLU X 122     147.152 130.322 226.356  1.00  0.00           H
ATOM   1948  HG3 GLU X 122     147.440 129.412 227.871  1.00  0.00           H
ATOM   1949  CD  GLU X 122     147.131 131.406 228.240  1.00  0.00           C
ATOM   1950  OE1 GLU X 122     147.753 131.759 229.281  1.00  0.00           O
ATOM   1951  OE2 GLU X 122     146.080 131.996 227.895  1.00  0.00           O
ATOM   1952  C   GLU X 122     151.393 131.538 227.065  1.00  0.00           C
ATOM   1953  O   GLU X 122     152.137 131.779 228.045  1.00  0.00           O
ATOM   1954  N   ILE X 123     151.920 131.047 225.898  1.00  0.00           N
ATOM   1955  H   ILE X 123     151.370 130.979 225.054  1.00  0.00           H
ATOM   1956  CA  ILE X 123     153.320 130.701 225.750  1.00  0.00           C
ATOM   1957  HA  ILE X 123     153.624 130.192 226.665  1.00  0.00           H
ATOM   1958  CB  ILE X 123     153.620 129.733 224.623  1.00  0.00           C
ATOM   1959  HB  ILE X 123     152.892 129.888 223.827  1.00  0.00           H
ATOM   1960  CG2 ILE X 123     155.033 129.779 223.972  1.00  0.00           C
ATOM   1961 HG21 ILE X 123     155.193 129.032 223.194  1.00  0.00           H
ATOM   1962 HG22 ILE X 123     155.818 129.774 224.729  1.00  0.00           H
ATOM   1963 HG23 ILE X 123     155.166 130.771 223.541  1.00  0.00           H
ATOM   1964  CG1 ILE X 123     153.310 128.270 225.046  1.00  0.00           C
ATOM   1965 HG12 ILE X 123     153.574 127.597 224.230  1.00  0.00           H
ATOM   1966 HG13 ILE X 123     153.881 128.032 225.943  1.00  0.00           H
ATOM   1967  CD1 ILE X 123     151.866 127.879 225.341  1.00  0.00           C
ATOM   1968 HD11 ILE X 123     151.566 128.405 226.247  1.00  0.00           H
ATOM   1969 HD12 ILE X 123     151.837 126.817 225.587  1.00  0.00           H
ATOM   1970 HD13 ILE X 123     151.184 128.061 224.510  1.00  0.00           H
ATOM   1971  C   ILE X 123     154.250 131.917 225.796  1.00  0.00           C
ATOM   1972  O   ILE X 123     155.265 131.911 226.495  1.00  0.00           O
ATOM   1973  N   ARG X 124     153.754 132.952 225.076  1.00  0.00           N
ATOM   1974  H   ARG X 124     152.966 132.819 224.459  1.00  0.00           H
ATOM   1975  CA  ARG X 124     154.345 134.296 225.147  1.00  0.00           C
ATOM   1976  HA  ARG X 124     155.366 134.058 224.849  1.00  0.00           H
ATOM   1977  CB  ARG X 124     153.515 135.154 224.255  1.00  0.00           C
ATOM   1978  HB2 ARG X 124     153.461 134.762 223.240  1.00  0.00           H
ATOM   1979  HB3 ARG X 124     152.497 135.096 224.641  1.00  0.00           H
ATOM   1980  CG  ARG X 124     153.933 136.628 224.304  1.00  0.00           C
ATOM   1981  HG2 ARG X 124     153.600 137.116 225.220  1.00  0.00           H
ATOM   1982  HG3 ARG X 124     155.023 136.643 224.319  1.00  0.00           H
ATOM   1983  CD  ARG X 124     153.605 137.363 223.130  1.00  0.00           C
ATOM   1984  HD2 ARG X 124     154.127 137.040 222.230  1.00  0.00           H
ATOM   1985  HD3 ARG X 124     152.562 137.189 222.866  1.00  0.00           H
ATOM   1986  NE  ARG X 124     153.655 138.822 223.364  1.00  0.00           N
ATOM   1987  HE  ARG X 124     153.040 139.275 224.025  1.00  0.00           H
ATOM   1988  CZ  ARG X 124     154.469 139.571 222.712  1.00  0.00           C
ATOM   1989  NH1 ARG X 124     155.021 139.298 221.573  1.00  0.00           N
ATOM   1990 HH11 ARG X 124     154.751 138.440 221.112  1.00  0.00           H
ATOM   1991 HH12 ARG X 124     155.500 140.054 221.106  1.00  0.00           H
ATOM   1992  NH2 ARG X 124     154.689 140.723 223.224  1.00  0.00           N
ATOM   1993 HH21 ARG X 124     154.396 141.004 224.148  1.00  0.00           H
ATOM   1994 HH22 ARG X 124     155.357 141.305 222.739  1.00  0.00           H
ATOM   1995  C   ARG X 124     154.468 134.746 226.629  1.00  0.00           C
ATOM   1996  O   ARG X 124     155.538 135.179 227.045  1.00  0.00           O
ATOM   1997  N   ARG X 125     153.411 134.781 227.471  1.00  0.00           N
ATOM   1998  H   ARG X 125     152.539 134.631 226.982  1.00  0.00           H
ATOM   1999  CA  ARG X 125     153.464 135.308 228.858  1.00  0.00           C
ATOM   2000  HA  ARG X 125     153.945 136.286 228.841  1.00  0.00           H
ATOM   2001  CB  ARG X 125     152.052 135.371 229.386  1.00  0.00           C
ATOM   2002  HB2 ARG X 125     151.645 134.426 229.025  1.00  0.00           H
ATOM   2003  HB3 ARG X 125     152.018 135.421 230.474  1.00  0.00           H
ATOM   2004  CG  ARG X 125     151.364 136.553 228.794  1.00  0.00           C
ATOM   2005  HG2 ARG X 125     151.951 137.420 229.097  1.00  0.00           H
ATOM   2006  HG3 ARG X 125     151.344 136.615 227.706  1.00  0.00           H
ATOM   2007  CD  ARG X 125     149.946 136.773 229.435  1.00  0.00           C
ATOM   2008  HD2 ARG X 125     149.966 136.508 230.492  1.00  0.00           H
ATOM   2009  HD3 ARG X 125     149.864 137.856 229.533  1.00  0.00           H
ATOM   2010  NE  ARG X 125     148.866 136.235 228.555  1.00  0.00           N
ATOM   2011  HE  ARG X 125     148.493 136.810 227.813  1.00  0.00           H
ATOM   2012  CZ  ARG X 125     148.248 135.117 228.902  1.00  0.00           C
ATOM   2013  NH1 ARG X 125     148.729 134.245 229.766  1.00  0.00           N
ATOM   2014 HH11 ARG X 125     149.521 134.442 230.361  1.00  0.00           H
ATOM   2015 HH12 ARG X 125     148.307 133.328 229.807  1.00  0.00           H
ATOM   2016  NH2 ARG X 125     147.239 134.785 228.172  1.00  0.00           N
ATOM   2017 HH21 ARG X 125     146.769 135.509 227.648  1.00  0.00           H
ATOM   2018 HH22 ARG X 125     146.812 133.870 228.186  1.00  0.00           H
ATOM   2019  C   ARG X 125     154.366 134.443 229.771  1.00  0.00           C
ATOM   2020  O   ARG X 125     154.958 134.969 230.739  1.00  0.00           O
ATOM   2021  N   PHE X 126     154.596 133.161 229.573  1.00  0.00           N
ATOM   2022  H   PHE X 126     154.109 132.764 228.782  1.00  0.00           H
ATOM   2023  CA  PHE X 126     155.576 132.358 230.238  1.00  0.00           C
ATOM   2024  HA  PHE X 126     155.530 132.462 231.322  1.00  0.00           H
ATOM   2025  CB  PHE X 126     155.341 130.845 229.978  1.00  0.00           C
ATOM   2026  HB2 PHE X 126     154.436 130.490 230.471  1.00  0.00           H
ATOM   2027  HB3 PHE X 126     155.021 130.822 228.937  1.00  0.00           H
ATOM   2028  CG  PHE X 126     156.516 130.002 230.274  1.00  0.00           C
ATOM   2029  CD1 PHE X 126     157.421 129.600 229.256  1.00  0.00           C
ATOM   2030  HD1 PHE X 126     157.208 129.990 228.271  1.00  0.00           H
ATOM   2031  CE1 PHE X 126     158.594 128.892 229.543  1.00  0.00           C
ATOM   2032  HE1 PHE X 126     159.329 128.583 228.814  1.00  0.00           H
ATOM   2033  CZ  PHE X 126     158.849 128.563 230.929  1.00  0.00           C
ATOM   2034  HZ  PHE X 126     159.637 127.858 231.150  1.00  0.00           H
ATOM   2035  CE2 PHE X 126     157.973 128.969 231.978  1.00  0.00           C
ATOM   2036  HE2 PHE X 126     158.012 128.686 233.019  1.00  0.00           H
ATOM   2037  CD2 PHE X 126     156.815 129.711 231.570  1.00  0.00           C
ATOM   2038  HD2 PHE X 126     156.064 130.005 232.288  1.00  0.00           H
ATOM   2039  C   PHE X 126     156.935 132.872 229.855  1.00  0.00           C
ATOM   2040  O   PHE X 126     157.627 133.163 230.902  1.00  0.00           O
ATOM   2041  N   SER X 127     157.294 132.932 228.583  1.00  0.00           N
ATOM   2042  H   SER X 127     156.655 132.638 227.858  1.00  0.00           H
ATOM   2043  CA  SER X 127     158.712 133.160 228.206  1.00  0.00           C
ATOM   2044  HA  SER X 127     159.328 132.316 228.517  1.00  0.00           H
ATOM   2045  CB  SER X 127     158.915 133.237 226.696  1.00  0.00           C
ATOM   2046  HB2 SER X 127     158.494 134.143 226.257  1.00  0.00           H
ATOM   2047  HB3 SER X 127     159.991 133.267 226.525  1.00  0.00           H
ATOM   2048  OG  SER X 127     158.392 132.133 226.036  1.00  0.00           O
ATOM   2049  HG  SER X 127     157.470 132.059 226.293  1.00  0.00           H
ATOM   2050  C   SER X 127     159.137 134.497 228.813  1.00  0.00           C
ATOM   2051  O   SER X 127     160.228 134.603 229.410  1.00  0.00           O
ATOM   2052  N   LEU X 128     158.320 135.533 228.753  1.00  0.00           N
ATOM   2053  H   LEU X 128     157.398 135.424 228.354  1.00  0.00           H
ATOM   2054  CA  LEU X 128     158.688 136.907 229.231  1.00  0.00           C
ATOM   2055  HA  LEU X 128     159.531 137.325 228.680  1.00  0.00           H
ATOM   2056  CB  LEU X 128     157.534 137.846 229.020  1.00  0.00           C
ATOM   2057  HB2 LEU X 128     156.652 137.331 229.400  1.00  0.00           H
ATOM   2058  HB3 LEU X 128     157.629 138.765 229.597  1.00  0.00           H
ATOM   2059  CG  LEU X 128     157.279 138.226 227.552  1.00  0.00           C
ATOM   2060  HG  LEU X 128     157.277 137.290 226.994  1.00  0.00           H
ATOM   2061  CD1 LEU X 128     155.906 138.902 227.414  1.00  0.00           C
ATOM   2062 HD11 LEU X 128     155.173 138.177 227.767  1.00  0.00           H
ATOM   2063 HD12 LEU X 128     155.574 139.011 226.382  1.00  0.00           H
ATOM   2064 HD13 LEU X 128     155.905 139.866 227.923  1.00  0.00           H
ATOM   2065  CD2 LEU X 128     158.392 139.147 227.057  1.00  0.00           C
ATOM   2066 HD21 LEU X 128     158.311 140.067 227.636  1.00  0.00           H
ATOM   2067 HD22 LEU X 128     159.388 138.713 227.155  1.00  0.00           H
ATOM   2068 HD23 LEU X 128     158.295 139.362 225.993  1.00  0.00           H
ATOM   2069  C   LEU X 128     158.979 136.920 230.732  1.00  0.00           C
ATOM   2070  O   LEU X 128     159.894 137.626 231.148  1.00  0.00           O
ATOM   2071  N   MET X 129     158.124 136.191 231.479  1.00  0.00           N
ATOM   2072  H   MET X 129     157.424 135.631 231.013  1.00  0.00           H
ATOM   2073  CA  MET X 129     158.319 136.145 232.938  1.00  0.00           C
ATOM   2074  HA  MET X 129     158.509 137.182 233.213  1.00  0.00           H
ATOM   2075  CB  MET X 129     157.061 135.762 233.732  1.00  0.00           C
ATOM   2076  HB2 MET X 129     156.825 134.784 233.314  1.00  0.00           H
ATOM   2077  HB3 MET X 129     157.237 135.724 234.807  1.00  0.00           H
ATOM   2078  CG  MET X 129     155.875 136.682 233.621  1.00  0.00           C
ATOM   2079  HG2 MET X 129     156.170 137.657 234.008  1.00  0.00           H
ATOM   2080  HG3 MET X 129     155.709 136.668 232.544  1.00  0.00           H
ATOM   2081  SD  MET X 129     154.427 136.211 234.511  1.00  0.00           S
ATOM   2082  CE  MET X 129     153.885 134.658 233.813  1.00  0.00           C
ATOM   2083  HE1 MET X 129     153.134 134.209 234.463  1.00  0.00           H
ATOM   2084  HE2 MET X 129     153.362 134.859 232.878  1.00  0.00           H
ATOM   2085  HE3 MET X 129     154.733 133.990 233.664  1.00  0.00           H
ATOM   2086  C   MET X 129     159.546 135.309 233.369  1.00  0.00           C
ATOM   2087  O   MET X 129     160.170 135.596 234.422  1.00  0.00           O
ATOM   2088  N   THR X 130     159.984 134.354 232.569  1.00  0.00           N
ATOM   2089  H   THR X 130     159.427 134.202 231.740  1.00  0.00           H
ATOM   2090  CA  THR X 130     161.157 133.494 232.760  1.00  0.00           C
ATOM   2091  HA  THR X 130     161.252 133.289 233.827  1.00  0.00           H
ATOM   2092  CB  THR X 130     161.015 132.284 231.829  1.00  0.00           C
ATOM   2093  HB  THR X 130     160.903 132.566 230.782  1.00  0.00           H
ATOM   2094  CG2 THR X 130     162.049 131.199 231.758  1.00  0.00           C
ATOM   2095 HG21 THR X 130     162.917 131.613 231.245  1.00  0.00           H
ATOM   2096 HG22 THR X 130     161.642 130.314 231.270  1.00  0.00           H
ATOM   2097 HG23 THR X 130     162.250 130.876 232.780  1.00  0.00           H
ATOM   2098  OG1 THR X 130     159.842 131.594 232.217  1.00  0.00           O
ATOM   2099  HG1 THR X 130     159.105 132.085 231.846  1.00  0.00           H
ATOM   2100  C   THR X 130     162.382 134.288 232.285  1.00  0.00           C
ATOM   2101  O   THR X 130     163.429 134.155 232.900  1.00  0.00           O
ATOM   2102  N   LEU X 131     162.261 135.130 231.274  1.00  0.00           N
ATOM   2103  H   LEU X 131     161.430 135.049 230.707  1.00  0.00           H
ATOM   2104  CA  LEU X 131     163.324 136.129 230.851  1.00  0.00           C
ATOM   2105  HA  LEU X 131     164.276 135.600 230.903  1.00  0.00           H
ATOM   2106  CB  LEU X 131     162.932 136.528 229.443  1.00  0.00           C
ATOM   2107  HB2 LEU X 131     161.930 136.956 229.413  1.00  0.00           H
ATOM   2108  HB3 LEU X 131     163.537 137.405 229.210  1.00  0.00           H
ATOM   2109  CG  LEU X 131     163.086 135.451 228.385  1.00  0.00           C
ATOM   2110  HG  LEU X 131     162.509 134.544 228.565  1.00  0.00           H
ATOM   2111  CD1 LEU X 131     162.492 136.110 227.135  1.00  0.00           C
ATOM   2112 HD11 LEU X 131     162.877 135.633 226.234  1.00  0.00           H
ATOM   2113 HD12 LEU X 131     162.805 137.144 226.994  1.00  0.00           H
ATOM   2114 HD13 LEU X 131     161.404 136.151 227.080  1.00  0.00           H
ATOM   2115  CD2 LEU X 131     164.579 135.169 228.040  1.00  0.00           C
ATOM   2116 HD21 LEU X 131     164.765 134.487 227.211  1.00  0.00           H
ATOM   2117 HD22 LEU X 131     165.107 136.101 227.841  1.00  0.00           H
ATOM   2118 HD23 LEU X 131     165.089 134.817 228.937  1.00  0.00           H
ATOM   2119  C   LEU X 131     163.511 137.391 231.718  1.00  0.00           C
ATOM   2120  O   LEU X 131     164.363 138.216 231.401  1.00  0.00           O
ATOM   2121  N   ARG X 132     162.809 137.464 232.886  1.00  0.00           N
ATOM   2122  H   ARG X 132     162.185 136.695 233.081  1.00  0.00           H
ATOM   2123  CA  ARG X 132     163.245 138.340 233.972  1.00  0.00           C
ATOM   2124  HA  ARG X 132     163.427 139.314 233.518  1.00  0.00           H
ATOM   2125  CB  ARG X 132     162.048 138.516 234.960  1.00  0.00           C
ATOM   2126  HB2 ARG X 132     161.820 137.584 235.477  1.00  0.00           H
ATOM   2127  HB3 ARG X 132     162.338 139.118 235.821  1.00  0.00           H
ATOM   2128  CG  ARG X 132     160.741 139.163 234.440  1.00  0.00           C
ATOM   2129  HG2 ARG X 132     160.919 140.228 234.291  1.00  0.00           H
ATOM   2130  HG3 ARG X 132     160.492 138.841 233.429  1.00  0.00           H
ATOM   2131  CD  ARG X 132     159.481 138.989 235.292  1.00  0.00           C
ATOM   2132  HD2 ARG X 132     159.316 137.931 235.497  1.00  0.00           H
ATOM   2133  HD3 ARG X 132     159.773 139.569 236.167  1.00  0.00           H
ATOM   2134  NE  ARG X 132     158.328 139.560 234.612  1.00  0.00           N
ATOM   2135  HE  ARG X 132     158.384 139.696 233.613  1.00  0.00           H
ATOM   2136  CZ  ARG X 132     157.219 139.827 235.243  1.00  0.00           C
ATOM   2137  NH1 ARG X 132     157.087 139.537 236.528  1.00  0.00           N
ATOM   2138 HH11 ARG X 132     157.721 139.005 237.105  1.00  0.00           H
ATOM   2139 HH12 ARG X 132     156.275 139.937 236.977  1.00  0.00           H
ATOM   2140  NH2 ARG X 132     156.248 140.336 234.639  1.00  0.00           N
ATOM   2141 HH21 ARG X 132     156.322 140.386 233.633  1.00  0.00           H
ATOM   2142 HH22 ARG X 132     155.380 140.506 235.127  1.00  0.00           H
ATOM   2143  C   ARG X 132     164.536 137.851 234.582  1.00  0.00           C
ATOM   2144  O   ARG X 132     164.860 136.669 234.451  1.00  0.00           O
ATOM   2145  N   ASN X 133     165.371 138.787 235.014  1.00  0.00           N
ATOM   2146  H   ASN X 133     165.033 139.709 234.780  1.00  0.00           H
ATOM   2147  CA  ASN X 133     166.802 138.610 235.208  1.00  0.00           C
ATOM   2148  HA  ASN X 133     167.292 138.523 234.238  1.00  0.00           H
ATOM   2149  CB  ASN X 133     167.438 139.832 235.868  1.00  0.00           C
ATOM   2150  HB2 ASN X 133     166.970 140.633 235.296  1.00  0.00           H
ATOM   2151  HB3 ASN X 133     167.101 139.792 236.904  1.00  0.00           H
ATOM   2152  CG  ASN X 133     168.966 139.854 235.833  1.00  0.00           C
ATOM   2153  OD1 ASN X 133     169.543 139.434 234.814  1.00  0.00           O
ATOM   2154  ND2 ASN X 133     169.724 140.368 236.794  1.00  0.00           N
ATOM   2155 HD21 ASN X 133     169.263 140.678 237.638  1.00  0.00           H
ATOM   2156 HD22 ASN X 133     170.719 140.296 236.638  1.00  0.00           H
ATOM   2157  C   ASN X 133     167.261 137.387 236.009  1.00  0.00           C
ATOM   2158  O   ASN X 133     168.373 136.908 235.783  1.00  0.00           O
ATOM   2159  N   PHE X 134     166.472 136.935 237.041  1.00  0.00           N
ATOM   2160  H   PHE X 134     165.674 137.426 237.418  1.00  0.00           H
ATOM   2161  CA  PHE X 134     166.799 135.752 237.807  1.00  0.00           C
ATOM   2162  HA  PHE X 134     167.736 135.342 237.430  1.00  0.00           H
ATOM   2163  CB  PHE X 134     166.927 136.188 239.241  1.00  0.00           C
ATOM   2164  HB2 PHE X 134     165.999 136.602 239.635  1.00  0.00           H
ATOM   2165  HB3 PHE X 134     166.967 135.330 239.913  1.00  0.00           H
ATOM   2166  CG  PHE X 134     167.981 137.283 239.534  1.00  0.00           C
ATOM   2167  CD1 PHE X 134     167.575 138.593 239.753  1.00  0.00           C
ATOM   2168  HD1 PHE X 134     166.523 138.826 239.683  1.00  0.00           H
ATOM   2169  CE1 PHE X 134     168.419 139.640 240.164  1.00  0.00           C
ATOM   2170  HE1 PHE X 134     168.050 140.652 240.240  1.00  0.00           H
ATOM   2171  CZ  PHE X 134     169.810 139.361 240.249  1.00  0.00           C
ATOM   2172  HZ  PHE X 134     170.519 140.084 240.625  1.00  0.00           H
ATOM   2173  CE2 PHE X 134     170.240 138.018 240.205  1.00  0.00           C
ATOM   2174  HE2 PHE X 134     171.290 137.883 240.417  1.00  0.00           H
ATOM   2175  CD2 PHE X 134     169.350 136.954 239.834  1.00  0.00           C
ATOM   2176  HD2 PHE X 134     169.636 135.928 240.013  1.00  0.00           H
ATOM   2177  C   PHE X 134     165.740 134.591 237.693  1.00  0.00           C
ATOM   2178  O   PHE X 134     165.777 133.620 238.435  1.00  0.00           O
ATOM   2179  N   GLY X 135     164.791 134.685 236.766  1.00  0.00           N
ATOM   2180  H   GLY X 135     164.869 135.497 236.171  1.00  0.00           H
ATOM   2181  CA  GLY X 135     163.661 133.745 236.551  1.00  0.00           C
ATOM   2182  HA2 GLY X 135     162.921 133.634 237.344  1.00  0.00           H
ATOM   2183  HA3 GLY X 135     163.048 134.163 235.752  1.00  0.00           H
ATOM   2184  C   GLY X 135     164.084 132.232 236.170  1.00  0.00           C
ATOM   2185  O   GLY X 135     163.187 131.354 236.226  1.00  0.00           O
ATOM   2186  N   MET X 136     165.359 131.946 235.833  1.00  0.00           N
ATOM   2187  H   MET X 136     165.956 132.739 235.644  1.00  0.00           H
ATOM   2188  CA  MET X 136     165.982 130.595 235.826  1.00  0.00           C
ATOM   2189  HA  MET X 136     165.401 130.065 236.581  1.00  0.00           H
ATOM   2190  CB  MET X 136     165.746 129.782 234.458  1.00  0.00           C
ATOM   2191  HB2 MET X 136     165.793 128.743 234.786  1.00  0.00           H
ATOM   2192  HB3 MET X 136     164.695 129.807 234.169  1.00  0.00           H
ATOM   2193  CG  MET X 136     166.800 130.062 233.361  1.00  0.00           C
ATOM   2194  HG2 MET X 136     167.668 129.490 233.690  1.00  0.00           H
ATOM   2195  HG3 MET X 136     166.419 129.686 232.412  1.00  0.00           H
ATOM   2196  SD  MET X 136     167.289 131.796 232.993  1.00  0.00           S
ATOM   2197  CE  MET X 136     165.761 132.257 232.090  1.00  0.00           C
ATOM   2198  HE1 MET X 136     165.773 132.190 231.002  1.00  0.00           H
ATOM   2199  HE2 MET X 136     164.908 131.696 232.470  1.00  0.00           H
ATOM   2200  HE3 MET X 136     165.658 133.327 232.266  1.00  0.00           H
ATOM   2201  C   MET X 136     167.444 130.578 236.255  1.00  0.00           C
ATOM   2202  O   MET X 136     168.131 131.552 235.944  1.00  0.00           O
ATOM   2203  N   GLY X 137     167.903 129.452 236.835  1.00  0.00           N
ATOM   2204  H   GLY X 137     167.310 128.643 236.957  1.00  0.00           H
ATOM   2205  CA  GLY X 137     169.347 129.279 237.048  1.00  0.00           C
ATOM   2206  HA2 GLY X 137     169.514 128.202 237.069  1.00  0.00           H
ATOM   2207  HA3 GLY X 137     169.865 129.458 236.105  1.00  0.00           H
ATOM   2208  C   GLY X 137     169.800 130.124 238.279  1.00  0.00           C
ATOM   2209  O   GLY X 137     169.165 131.083 238.606  1.00  0.00           O
ATOM   2210  N   LYS X 138     170.864 129.717 238.978  1.00  0.00           N
ATOM   2211  H   LYS X 138     171.350 128.964 238.512  1.00  0.00           H
ATOM   2212  CA  LYS X 138     171.423 130.438 240.146  1.00  0.00           C
ATOM   2213  HA  LYS X 138     170.549 130.542 240.789  1.00  0.00           H
ATOM   2214  CB  LYS X 138     172.432 129.478 240.930  1.00  0.00           C
ATOM   2215  HB2 LYS X 138     172.024 128.468 240.896  1.00  0.00           H
ATOM   2216  HB3 LYS X 138     173.445 129.676 240.581  1.00  0.00           H
ATOM   2217  CG  LYS X 138     172.421 129.740 242.442  1.00  0.00           C
ATOM   2218  HG2 LYS X 138     172.903 130.705 242.598  1.00  0.00           H
ATOM   2219  HG3 LYS X 138     171.399 129.709 242.819  1.00  0.00           H
ATOM   2220  CD  LYS X 138     173.315 128.664 243.165  1.00  0.00           C
ATOM   2221  HD2 LYS X 138     172.921 127.652 243.066  1.00  0.00           H
ATOM   2222  HD3 LYS X 138     174.306 128.765 242.723  1.00  0.00           H
ATOM   2223  CE  LYS X 138     173.377 129.026 244.682  1.00  0.00           C
ATOM   2224  HE2 LYS X 138     172.379 129.175 245.095  1.00  0.00           H
ATOM   2225  HE3 LYS X 138     173.785 128.125 245.140  1.00  0.00           H
ATOM   2226  NZ  LYS X 138     174.320 130.120 244.873  1.00  0.00           N
ATOM   2227  HZ1 LYS X 138     174.336 130.410 245.841  1.00  0.00           H
ATOM   2228  HZ2 LYS X 138     174.197 130.975 244.350  1.00  0.00           H
ATOM   2229  HZ3 LYS X 138     175.277 129.845 244.705  1.00  0.00           H
ATOM   2230  C   LYS X 138     171.928 131.809 239.913  1.00  0.00           C
ATOM   2231  O   LYS X 138     171.781 132.662 240.821  1.00  0.00           O
ATOM   2232  N   ARG X 139     172.543 131.995 238.746  1.00  0.00           N
ATOM   2233  H   ARG X 139     172.566 131.183 238.146  1.00  0.00           H
ATOM   2234  CA  ARG X 139     173.121 133.259 238.424  1.00  0.00           C
ATOM   2235  HA  ARG X 139     173.245 133.916 239.285  1.00  0.00           H
ATOM   2236  CB  ARG X 139     174.512 133.115 237.844  1.00  0.00           C
ATOM   2237  HB2 ARG X 139     175.087 134.038 237.928  1.00  0.00           H
ATOM   2238  HB3 ARG X 139     175.016 132.424 238.520  1.00  0.00           H
ATOM   2239  CG  ARG X 139     174.686 132.473 236.394  1.00  0.00           C
ATOM   2240  HG2 ARG X 139     174.079 131.567 236.422  1.00  0.00           H
ATOM   2241  HG3 ARG X 139     174.274 133.216 235.711  1.00  0.00           H
ATOM   2242  CD  ARG X 139     176.088 132.122 235.914  1.00  0.00           C
ATOM   2243  HD2 ARG X 139     176.503 131.305 236.504  1.00  0.00           H
ATOM   2244  HD3 ARG X 139     176.007 131.723 234.903  1.00  0.00           H
ATOM   2245  NE  ARG X 139     177.001 133.195 236.071  1.00  0.00           N
ATOM   2246  HE  ARG X 139     176.674 134.037 236.523  1.00  0.00           H
ATOM   2247  CZ  ARG X 139     178.115 133.322 235.377  1.00  0.00           C
ATOM   2248  NH1 ARG X 139     178.584 132.436 234.540  1.00  0.00           N
ATOM   2249 HH11 ARG X 139     177.982 131.771 234.075  1.00  0.00           H
ATOM   2250 HH12 ARG X 139     179.464 132.530 234.053  1.00  0.00           H
ATOM   2251  NH2 ARG X 139     178.736 134.375 235.658  1.00  0.00           N
ATOM   2252 HH21 ARG X 139     178.366 134.911 236.429  1.00  0.00           H
ATOM   2253 HH22 ARG X 139     179.564 134.674 235.163  1.00  0.00           H
ATOM   2254  C   ARG X 139     172.103 134.056 237.560  1.00  0.00           C
ATOM   2255  O   ARG X 139     171.336 133.460 236.816  1.00  0.00           O
ATOM   2256  N   SER X 140     172.223 135.347 237.534  1.00  0.00           N
ATOM   2257  H   SER X 140     172.911 135.825 238.098  1.00  0.00           H
ATOM   2258  CA  SER X 140     171.420 136.206 236.705  1.00  0.00           C
ATOM   2259  HA  SER X 140     170.401 135.878 236.912  1.00  0.00           H
ATOM   2260  CB  SER X 140     171.620 137.614 237.113  1.00  0.00           C
ATOM   2261  HB2 SER X 140     170.667 138.053 236.820  1.00  0.00           H
ATOM   2262  HB3 SER X 140     171.728 137.696 238.195  1.00  0.00           H
ATOM   2263  OG  SER X 140     172.713 138.244 236.447  1.00  0.00           O
ATOM   2264  HG  SER X 140     173.259 138.587 237.158  1.00  0.00           H
ATOM   2265  C   SER X 140     171.566 136.056 235.227  1.00  0.00           C
ATOM   2266  O   SER X 140     172.503 135.399 234.753  1.00  0.00           O
ATOM   2267  N   ILE X 141     170.646 136.565 234.368  1.00  0.00           N
ATOM   2268  H   ILE X 141     169.799 137.029 234.665  1.00  0.00           H
ATOM   2269  CA  ILE X 141     170.844 136.580 232.892  1.00  0.00           C
ATOM   2270  HA  ILE X 141     171.366 135.646 232.682  1.00  0.00           H
ATOM   2271  CB  ILE X 141     169.454 136.695 232.144  1.00  0.00           C
ATOM   2272  HB  ILE X 141     168.765 137.217 232.808  1.00  0.00           H
ATOM   2273  CG2 ILE X 141     169.470 137.412 230.771  1.00  0.00           C
ATOM   2274 HG21 ILE X 141     168.455 137.738 230.544  1.00  0.00           H
ATOM   2275 HG22 ILE X 141     169.772 136.703 230.000  1.00  0.00           H
ATOM   2276 HG23 ILE X 141     170.161 138.255 230.793  1.00  0.00           H
ATOM   2277  CG1 ILE X 141     169.011 135.235 231.991  1.00  0.00           C
ATOM   2278 HG12 ILE X 141     169.555 134.718 231.200  1.00  0.00           H
ATOM   2279 HG13 ILE X 141     169.010 134.643 232.906  1.00  0.00           H
ATOM   2280  CD1 ILE X 141     167.479 135.178 231.615  1.00  0.00           C
ATOM   2281 HD11 ILE X 141     166.802 135.299 232.460  1.00  0.00           H
ATOM   2282 HD12 ILE X 141     167.256 134.212 231.162  1.00  0.00           H
ATOM   2283 HD13 ILE X 141     167.170 135.857 230.820  1.00  0.00           H
ATOM   2284  C   ILE X 141     171.871 137.629 232.446  1.00  0.00           C
ATOM   2285  O   ILE X 141     172.762 137.321 231.596  1.00  0.00           O
ATOM   2286  N   GLU X 142     171.881 138.808 233.020  1.00  0.00           N
ATOM   2287  H   GLU X 142     171.264 138.851 233.818  1.00  0.00           H
ATOM   2288  CA  GLU X 142     172.745 139.996 232.730  1.00  0.00           C
ATOM   2289  HA  GLU X 142     172.635 140.271 231.681  1.00  0.00           H
ATOM   2290  CB  GLU X 142     172.258 141.093 233.596  1.00  0.00           C
ATOM   2291  HB2 GLU X 142     171.326 141.398 233.121  1.00  0.00           H
ATOM   2292  HB3 GLU X 142     172.041 140.728 234.600  1.00  0.00           H
ATOM   2293  CG  GLU X 142     173.077 142.466 233.433  1.00  0.00           C
ATOM   2294  HG2 GLU X 142     174.128 142.198 233.539  1.00  0.00           H
ATOM   2295  HG3 GLU X 142     172.824 142.889 232.461  1.00  0.00           H
ATOM   2296  CD  GLU X 142     172.732 143.446 234.543  1.00  0.00           C
ATOM   2297  OE1 GLU X 142     173.626 144.142 235.034  1.00  0.00           O
ATOM   2298  OE2 GLU X 142     171.568 143.555 234.989  1.00  0.00           O
ATOM   2299  C   GLU X 142     174.233 139.570 233.092  1.00  0.00           C
ATOM   2300  O   GLU X 142     175.122 139.856 232.277  1.00  0.00           O
ATOM   2301  N   ASP X 143     174.501 138.791 234.123  1.00  0.00           N
ATOM   2302  H   ASP X 143     173.813 138.529 234.814  1.00  0.00           H
ATOM   2303  CA  ASP X 143     175.811 138.190 234.467  1.00  0.00           C
ATOM   2304  HA  ASP X 143     176.537 139.001 234.415  1.00  0.00           H
ATOM   2305  CB  ASP X 143     175.675 137.569 235.906  1.00  0.00           C
ATOM   2306  HB2 ASP X 143     175.493 138.441 236.535  1.00  0.00           H
ATOM   2307  HB3 ASP X 143     174.936 136.773 236.002  1.00  0.00           H
ATOM   2308  CG  ASP X 143     177.033 137.023 236.469  1.00  0.00           C
ATOM   2309  OD1 ASP X 143     176.956 136.131 237.379  1.00  0.00           O
ATOM   2310  OD2 ASP X 143     178.213 137.514 236.204  1.00  0.00           O
ATOM   2311  C   ASP X 143     176.217 137.236 233.316  1.00  0.00           C
ATOM   2312  O   ASP X 143     177.362 137.250 232.883  1.00  0.00           O
ATOM   2313  N   ARG X 144     175.260 136.479 232.789  1.00  0.00           N
ATOM   2314  H   ARG X 144     174.351 136.499 233.228  1.00  0.00           H
ATOM   2315  CA  ARG X 144     175.589 135.568 231.725  1.00  0.00           C
ATOM   2316  HA  ARG X 144     176.570 135.104 231.821  1.00  0.00           H
ATOM   2317  CB  ARG X 144     174.435 134.523 231.617  1.00  0.00           C
ATOM   2318  HB2 ARG X 144     173.425 134.923 231.526  1.00  0.00           H
ATOM   2319  HB3 ARG X 144     174.530 134.088 230.622  1.00  0.00           H
ATOM   2320  CG  ARG X 144     174.553 133.357 232.683  1.00  0.00           C
ATOM   2321  HG2 ARG X 144     175.501 132.918 232.373  1.00  0.00           H
ATOM   2322  HG3 ARG X 144     174.651 133.883 233.633  1.00  0.00           H
ATOM   2323  CD  ARG X 144     173.433 132.336 232.623  1.00  0.00           C
ATOM   2324  HD2 ARG X 144     173.179 132.195 231.572  1.00  0.00           H
ATOM   2325  HD3 ARG X 144     173.773 131.370 232.996  1.00  0.00           H
ATOM   2326  NE  ARG X 144     172.241 132.759 233.398  1.00  0.00           N
ATOM   2327  HE  ARG X 144     172.440 133.302 234.227  1.00  0.00           H
ATOM   2328  CZ  ARG X 144     171.067 132.132 233.410  1.00  0.00           C
ATOM   2329  NH1 ARG X 144     170.781 131.210 232.521  1.00  0.00           N
ATOM   2330 HH11 ARG X 144     171.326 131.078 231.680  1.00  0.00           H
ATOM   2331 HH12 ARG X 144     169.952 130.661 232.701  1.00  0.00           H
ATOM   2332  NH2 ARG X 144     170.234 132.429 234.347  1.00  0.00           N
ATOM   2333 HH21 ARG X 144     170.499 132.860 235.221  1.00  0.00           H
ATOM   2334 HH22 ARG X 144     169.341 131.963 234.404  1.00  0.00           H
ATOM   2335  C   ARG X 144     175.810 136.291 230.315  1.00  0.00           C
ATOM   2336  O   ARG X 144     176.555 135.723 229.542  1.00  0.00           O
ATOM   2337  N   VAL X 145     175.283 137.486 230.114  1.00  0.00           N
ATOM   2338  H   VAL X 145     174.622 137.702 230.846  1.00  0.00           H
ATOM   2339  CA  VAL X 145     175.647 138.291 228.950  1.00  0.00           C
ATOM   2340  HA  VAL X 145     175.695 137.605 228.104  1.00  0.00           H
ATOM   2341  CB  VAL X 145     174.470 139.366 228.726  1.00  0.00           C
ATOM   2342  HB  VAL X 145     174.367 139.875 229.683  1.00  0.00           H
ATOM   2343  CG1 VAL X 145     174.803 140.478 227.790  1.00  0.00           C
ATOM   2344 HG11 VAL X 145     173.908 141.086 227.662  1.00  0.00           H
ATOM   2345 HG12 VAL X 145     175.722 141.014 228.027  1.00  0.00           H
ATOM   2346 HG13 VAL X 145     175.066 140.117 226.795  1.00  0.00           H
ATOM   2347  CG2 VAL X 145     173.178 138.661 228.412  1.00  0.00           C
ATOM   2348 HG21 VAL X 145     173.162 138.005 227.542  1.00  0.00           H
ATOM   2349 HG22 VAL X 145     172.320 139.333 228.400  1.00  0.00           H
ATOM   2350 HG23 VAL X 145     172.857 138.030 229.240  1.00  0.00           H
ATOM   2351  C   VAL X 145     177.056 138.905 229.018  1.00  0.00           C
ATOM   2352  O   VAL X 145     177.820 139.028 228.074  1.00  0.00           O
ATOM   2353  N   GLN X 146     177.399 139.278 230.263  1.00  0.00           N
ATOM   2354  H   GLN X 146     176.702 139.324 230.993  1.00  0.00           H
ATOM   2355  CA  GLN X 146     178.769 139.707 230.614  1.00  0.00           C
ATOM   2356  HA  GLN X 146     179.130 140.537 230.006  1.00  0.00           H
ATOM   2357  CB  GLN X 146     178.753 140.312 232.039  1.00  0.00           C
ATOM   2358  HB2 GLN X 146     178.344 139.493 232.631  1.00  0.00           H
ATOM   2359  HB3 GLN X 146     179.794 140.541 232.265  1.00  0.00           H
ATOM   2360  CG  GLN X 146     177.956 141.580 232.189  1.00  0.00           C
ATOM   2361  HG2 GLN X 146     178.415 142.369 231.593  1.00  0.00           H
ATOM   2362  HG3 GLN X 146     176.942 141.493 231.800  1.00  0.00           H
ATOM   2363  CD  GLN X 146     177.886 141.973 233.696  1.00  0.00           C
ATOM   2364  OE1 GLN X 146     178.690 142.635 234.254  1.00  0.00           O
ATOM   2365  NE2 GLN X 146     176.864 141.480 234.415  1.00  0.00           N
ATOM   2366 HE21 GLN X 146     177.016 141.398 235.411  1.00  0.00           H
ATOM   2367 HE22 GLN X 146     176.120 140.969 233.963  1.00  0.00           H
ATOM   2368  C   GLN X 146     179.814 138.584 230.493  1.00  0.00           C
ATOM   2369  O   GLN X 146     180.833 138.831 229.866  1.00  0.00           O
ATOM   2370  N   GLU X 147     179.509 137.327 230.766  1.00  0.00           N
ATOM   2371  H   GLU X 147     178.591 137.103 231.123  1.00  0.00           H
ATOM   2372  CA  GLU X 147     180.292 136.198 230.391  1.00  0.00           C
ATOM   2373  HA  GLU X 147     181.245 136.189 230.919  1.00  0.00           H
ATOM   2374  CB  GLU X 147     179.656 134.878 230.881  1.00  0.00           C
ATOM   2375  HB2 GLU X 147     179.298 135.039 231.898  1.00  0.00           H
ATOM   2376  HB3 GLU X 147     178.767 134.828 230.252  1.00  0.00           H
ATOM   2377  CG  GLU X 147     180.542 133.631 230.961  1.00  0.00           C
ATOM   2378  HG2 GLU X 147     179.903 132.768 231.144  1.00  0.00           H
ATOM   2379  HG3 GLU X 147     181.180 133.420 230.103  1.00  0.00           H
ATOM   2380  CD  GLU X 147     181.446 133.467 232.218  1.00  0.00           C
ATOM   2381  OE1 GLU X 147     180.931 133.311 233.360  1.00  0.00           O
ATOM   2382  OE2 GLU X 147     182.674 133.533 232.094  1.00  0.00           O
ATOM   2383  C   GLU X 147     180.628 136.076 228.851  1.00  0.00           C
ATOM   2384  O   GLU X 147     181.805 136.020 228.464  1.00  0.00           O
ATOM   2385  N   GLU X 148     179.615 136.204 228.002  1.00  0.00           N
ATOM   2386  H   GLU X 148     178.692 136.303 228.399  1.00  0.00           H
ATOM   2387  CA  GLU X 148     179.820 136.170 226.566  1.00  0.00           C
ATOM   2388  HA  GLU X 148     180.530 135.354 226.430  1.00  0.00           H
ATOM   2389  CB  GLU X 148     178.520 135.988 225.860  1.00  0.00           C
ATOM   2390  HB2 GLU X 148     178.029 136.940 226.065  1.00  0.00           H
ATOM   2391  HB3 GLU X 148     178.722 136.130 224.799  1.00  0.00           H
ATOM   2392  CG  GLU X 148     177.710 134.788 226.083  1.00  0.00           C
ATOM   2393  HG2 GLU X 148     177.017 135.000 226.898  1.00  0.00           H
ATOM   2394  HG3 GLU X 148     176.979 134.574 225.303  1.00  0.00           H
ATOM   2395  CD  GLU X 148     178.458 133.435 226.358  1.00  0.00           C
ATOM   2396  OE1 GLU X 148     179.207 133.012 225.447  1.00  0.00           O
ATOM   2397  OE2 GLU X 148     178.319 132.883 227.498  1.00  0.00           O
ATOM   2398  C   GLU X 148     180.651 137.447 226.062  1.00  0.00           C
ATOM   2399  O   GLU X 148     181.514 137.351 225.191  1.00  0.00           O
ATOM   2400  N   ALA X 149     180.332 138.600 226.642  1.00  0.00           N
ATOM   2401  H   ALA X 149     179.690 138.693 227.416  1.00  0.00           H
ATOM   2402  CA  ALA X 149     180.955 139.934 226.319  1.00  0.00           C
ATOM   2403  HA  ALA X 149     180.904 140.097 225.242  1.00  0.00           H
ATOM   2404  CB  ALA X 149     180.216 141.066 227.093  1.00  0.00           C
ATOM   2405  HB1 ALA X 149     180.447 141.042 228.158  1.00  0.00           H
ATOM   2406  HB2 ALA X 149     179.150 141.007 226.877  1.00  0.00           H
ATOM   2407  HB3 ALA X 149     180.482 142.067 226.753  1.00  0.00           H
ATOM   2408  C   ALA X 149     182.493 139.849 226.576  1.00  0.00           C
ATOM   2409  O   ALA X 149     183.330 140.245 225.749  1.00  0.00           O
ATOM   2410  N   ARG X 150     182.786 139.366 227.741  1.00  0.00           N
ATOM   2411  H   ARG X 150     182.064 139.177 228.422  1.00  0.00           H
ATOM   2412  CA  ARG X 150     184.151 139.179 228.238  1.00  0.00           C
ATOM   2413  HA  ARG X 150     184.638 140.152 228.170  1.00  0.00           H
ATOM   2414  CB  ARG X 150     184.147 138.752 229.745  1.00  0.00           C
ATOM   2415  HB2 ARG X 150     183.425 139.379 230.268  1.00  0.00           H
ATOM   2416  HB3 ARG X 150     183.835 137.710 229.674  1.00  0.00           H
ATOM   2417  CG  ARG X 150     185.458 138.832 230.607  1.00  0.00           C
ATOM   2418  HG2 ARG X 150     186.308 138.499 230.011  1.00  0.00           H
ATOM   2419  HG3 ARG X 150     185.712 139.881 230.759  1.00  0.00           H
ATOM   2420  CD  ARG X 150     185.104 138.123 231.948  1.00  0.00           C
ATOM   2421  HD2 ARG X 150     184.868 137.084 231.715  1.00  0.00           H
ATOM   2422  HD3 ARG X 150     185.989 138.105 232.584  1.00  0.00           H
ATOM   2423  NE  ARG X 150     184.085 138.849 232.685  1.00  0.00           N
ATOM   2424  HE  ARG X 150     184.299 139.814 232.892  1.00  0.00           H
ATOM   2425  CZ  ARG X 150     182.901 138.387 233.236  1.00  0.00           C
ATOM   2426  NH1 ARG X 150     182.572 137.170 233.352  1.00  0.00           N
ATOM   2427 HH11 ARG X 150     183.283 136.464 233.225  1.00  0.00           H
ATOM   2428 HH12 ARG X 150     181.660 136.949 233.725  1.00  0.00           H
ATOM   2429  NH2 ARG X 150     182.012 139.297 233.670  1.00  0.00           N
ATOM   2430 HH21 ARG X 150     182.400 140.202 233.895  1.00  0.00           H
ATOM   2431 HH22 ARG X 150     181.210 139.069 234.240  1.00  0.00           H
ATOM   2432  C   ARG X 150     184.960 138.074 227.478  1.00  0.00           C
ATOM   2433  O   ARG X 150     186.188 138.094 227.386  1.00  0.00           O
ATOM   2434  N   CYS X 151     184.191 137.213 226.875  1.00  0.00           N
ATOM   2435  H   CYS X 151     183.203 137.305 227.064  1.00  0.00           H
ATOM   2436  CA  CYS X 151     184.654 136.133 225.974  1.00  0.00           C
ATOM   2437  HA  CYS X 151     185.624 135.798 226.343  1.00  0.00           H
ATOM   2438  CB  CYS X 151     183.657 134.991 225.900  1.00  0.00           C
ATOM   2439  HB2 CYS X 151     183.200 134.783 226.868  1.00  0.00           H
ATOM   2440  HB3 CYS X 151     182.862 135.293 225.218  1.00  0.00           H
ATOM   2441  SG  CYS X 151     184.338 133.457 225.266  1.00  0.00           S
ATOM   2442  HG  CYS X 151     183.980 133.609 223.987  1.00  0.00           H
ATOM   2443  C   CYS X 151     185.028 136.654 224.579  1.00  0.00           C
ATOM   2444  O   CYS X 151     186.139 136.467 224.047  1.00  0.00           O
ATOM   2445  N   LEU X 152     184.036 137.355 224.004  1.00  0.00           N
ATOM   2446  H   LEU X 152     183.093 137.426 224.359  1.00  0.00           H
ATOM   2447  CA  LEU X 152     184.239 138.006 222.676  1.00  0.00           C
ATOM   2448  HA  LEU X 152     184.268 137.231 221.910  1.00  0.00           H
ATOM   2449  CB  LEU X 152     182.931 138.837 222.498  1.00  0.00           C
ATOM   2450  HB2 LEU X 152     182.125 138.109 222.410  1.00  0.00           H
ATOM   2451  HB3 LEU X 152     182.798 139.423 223.407  1.00  0.00           H
ATOM   2452  CG  LEU X 152     182.913 139.903 221.331  1.00  0.00           C
ATOM   2453  HG  LEU X 152     183.690 140.666 221.373  1.00  0.00           H
ATOM   2454  CD1 LEU X 152     183.087 139.081 220.032  1.00  0.00           C
ATOM   2455 HD11 LEU X 152     184.108 138.700 220.036  1.00  0.00           H
ATOM   2456 HD12 LEU X 152     183.028 139.873 219.285  1.00  0.00           H
ATOM   2457 HD13 LEU X 152     182.391 138.253 219.901  1.00  0.00           H
ATOM   2458  CD2 LEU X 152     181.576 140.568 221.358  1.00  0.00           C
ATOM   2459 HD21 LEU X 152     181.564 141.311 222.155  1.00  0.00           H
ATOM   2460 HD22 LEU X 152     181.370 140.974 220.368  1.00  0.00           H
ATOM   2461 HD23 LEU X 152     180.817 139.800 221.502  1.00  0.00           H
ATOM   2462  C   LEU X 152     185.506 138.825 222.458  1.00  0.00           C
ATOM   2463  O   LEU X 152     186.117 138.800 221.396  1.00  0.00           O
ATOM   2464  N   VAL X 153     185.919 139.653 223.425  1.00  0.00           N
ATOM   2465  H   VAL X 153     185.373 139.553 224.268  1.00  0.00           H
ATOM   2466  CA  VAL X 153     187.164 140.483 223.419  1.00  0.00           C
ATOM   2467  HA  VAL X 153     187.190 141.164 222.569  1.00  0.00           H
ATOM   2468  CB  VAL X 153     187.360 141.335 224.627  1.00  0.00           C
ATOM   2469  HB  VAL X 153     187.216 140.684 225.489  1.00  0.00           H
ATOM   2470  CG1 VAL X 153     188.727 142.052 224.791  1.00  0.00           C
ATOM   2471 HG11 VAL X 153     188.801 142.287 225.853  1.00  0.00           H
ATOM   2472 HG12 VAL X 153     189.605 141.406 224.780  1.00  0.00           H
ATOM   2473 HG13 VAL X 153     188.933 142.836 224.062  1.00  0.00           H
ATOM   2474  CG2 VAL X 153     186.323 142.396 224.617  1.00  0.00           C
ATOM   2475 HG21 VAL X 153     185.377 141.881 224.786  1.00  0.00           H
ATOM   2476 HG22 VAL X 153     186.294 142.963 223.686  1.00  0.00           H
ATOM   2477 HG23 VAL X 153     186.420 143.041 225.491  1.00  0.00           H
ATOM   2478  C   VAL X 153     188.432 139.569 223.215  1.00  0.00           C
ATOM   2479  O   VAL X 153     189.121 139.898 222.301  1.00  0.00           O
ATOM   2480  N   GLU X 154     188.739 138.620 224.095  1.00  0.00           N
ATOM   2481  H   GLU X 154     188.105 138.563 224.878  1.00  0.00           H
ATOM   2482  CA  GLU X 154     189.844 137.671 223.897  1.00  0.00           C
ATOM   2483  HA  GLU X 154     190.770 138.241 223.972  1.00  0.00           H
ATOM   2484  CB  GLU X 154     189.683 136.684 225.136  1.00  0.00           C
ATOM   2485  HB2 GLU X 154     189.625 137.231 226.077  1.00  0.00           H
ATOM   2486  HB3 GLU X 154     188.719 136.196 224.990  1.00  0.00           H
ATOM   2487  CG  GLU X 154     190.745 135.579 225.076  1.00  0.00           C
ATOM   2488  HG2 GLU X 154     190.330 134.932 225.848  1.00  0.00           H
ATOM   2489  HG3 GLU X 154     190.641 134.997 224.161  1.00  0.00           H
ATOM   2490  CD  GLU X 154     192.199 135.940 225.494  1.00  0.00           C
ATOM   2491  OE1 GLU X 154     192.968 135.078 225.887  1.00  0.00           O
ATOM   2492  OE2 GLU X 154     192.408 137.180 225.637  1.00  0.00           O
ATOM   2493  C   GLU X 154     189.778 136.842 222.551  1.00  0.00           C
ATOM   2494  O   GLU X 154     190.812 136.407 221.962  1.00  0.00           O
ATOM   2495  N   GLU X 155     188.580 136.594 221.984  1.00  0.00           N
ATOM   2496  H   GLU X 155     187.807 136.971 222.514  1.00  0.00           H
ATOM   2497  CA  GLU X 155     188.425 135.888 220.699  1.00  0.00           C
ATOM   2498  HA  GLU X 155     189.197 135.120 220.664  1.00  0.00           H
ATOM   2499  CB  GLU X 155     186.974 135.408 220.512  1.00  0.00           C
ATOM   2500  HB2 GLU X 155     186.807 134.763 221.376  1.00  0.00           H
ATOM   2501  HB3 GLU X 155     186.343 136.296 220.488  1.00  0.00           H
ATOM   2502  CG  GLU X 155     186.696 134.659 219.247  1.00  0.00           C
ATOM   2503  HG2 GLU X 155     185.623 134.530 219.100  1.00  0.00           H
ATOM   2504  HG3 GLU X 155     186.961 135.280 218.392  1.00  0.00           H
ATOM   2505  CD  GLU X 155     187.574 133.367 219.208  1.00  0.00           C
ATOM   2506  OE1 GLU X 155     188.103 133.015 218.074  1.00  0.00           O
ATOM   2507  OE2 GLU X 155     187.702 132.694 220.235  1.00  0.00           O
ATOM   2508  C   GLU X 155     188.759 136.885 219.598  1.00  0.00           C
ATOM   2509  O   GLU X 155     189.691 136.612 218.785  1.00  0.00           O
ATOM   2510  N   LEU X 156     188.244 138.125 219.569  1.00  0.00           N
ATOM   2511  H   LEU X 156     187.496 138.370 220.203  1.00  0.00           H
ATOM   2512  CA  LEU X 156     188.703 139.159 218.635  1.00  0.00           C
ATOM   2513  HA  LEU X 156     188.540 138.833 217.608  1.00  0.00           H
ATOM   2514  CB  LEU X 156     187.908 140.444 219.032  1.00  0.00           C
ATOM   2515  HB2 LEU X 156     187.868 140.441 220.121  1.00  0.00           H
ATOM   2516  HB3 LEU X 156     188.445 141.331 218.698  1.00  0.00           H
ATOM   2517  CG  LEU X 156     186.501 140.494 218.411  1.00  0.00           C
ATOM   2518  HG  LEU X 156     185.975 139.602 218.749  1.00  0.00           H
ATOM   2519  CD1 LEU X 156     185.711 141.637 218.987  1.00  0.00           C
ATOM   2520 HD11 LEU X 156     186.169 142.621 218.891  1.00  0.00           H
ATOM   2521 HD12 LEU X 156     185.531 141.530 220.057  1.00  0.00           H
ATOM   2522 HD13 LEU X 156     184.666 141.527 218.697  1.00  0.00           H
ATOM   2523  CD2 LEU X 156     186.365 140.497 216.914  1.00  0.00           C
ATOM   2524 HD21 LEU X 156     186.910 139.652 216.494  1.00  0.00           H
ATOM   2525 HD22 LEU X 156     185.398 140.356 216.430  1.00  0.00           H
ATOM   2526 HD23 LEU X 156     186.744 141.423 216.481  1.00  0.00           H
ATOM   2527  C   LEU X 156     190.206 139.473 218.691  1.00  0.00           C
ATOM   2528  O   LEU X 156     190.864 139.760 217.709  1.00  0.00           O
ATOM   2529  N   ARG X 157     190.777 139.407 219.879  1.00  0.00           N
ATOM   2530  H   ARG X 157     190.128 139.367 220.652  1.00  0.00           H
ATOM   2531  CA  ARG X 157     192.229 139.746 220.144  1.00  0.00           C
ATOM   2532  HA  ARG X 157     192.383 140.704 219.647  1.00  0.00           H
ATOM   2533  CB  ARG X 157     192.498 139.756 221.699  1.00  0.00           C
ATOM   2534  HB2 ARG X 157     191.702 140.270 222.238  1.00  0.00           H
ATOM   2535  HB3 ARG X 157     192.469 138.716 222.025  1.00  0.00           H
ATOM   2536  CG  ARG X 157     193.928 140.271 222.098  1.00  0.00           C
ATOM   2537  HG2 ARG X 157     194.798 139.719 221.744  1.00  0.00           H
ATOM   2538  HG3 ARG X 157     193.936 141.334 221.855  1.00  0.00           H
ATOM   2539  CD  ARG X 157     194.051 140.100 223.632  1.00  0.00           C
ATOM   2540  HD2 ARG X 157     194.923 140.663 223.963  1.00  0.00           H
ATOM   2541  HD3 ARG X 157     193.184 140.512 224.148  1.00  0.00           H
ATOM   2542  NE  ARG X 157     194.240 138.703 224.060  1.00  0.00           N
ATOM   2543  HE  ARG X 157     193.515 138.227 224.578  1.00  0.00           H
ATOM   2544  CZ  ARG X 157     195.355 138.150 224.260  1.00  0.00           C
ATOM   2545  NH1 ARG X 157     196.534 138.584 223.905  1.00  0.00           N
ATOM   2546 HH11 ARG X 157     196.554 139.436 223.363  1.00  0.00           H
ATOM   2547 HH12 ARG X 157     197.269 137.899 224.009  1.00  0.00           H
ATOM   2548  NH2 ARG X 157     195.248 137.001 224.768  1.00  0.00           N
ATOM   2549 HH21 ARG X 157     194.358 136.832 225.215  1.00  0.00           H
ATOM   2550 HH22 ARG X 157     196.030 136.369 224.862  1.00  0.00           H
ATOM   2551  C   ARG X 157     193.202 138.889 219.365  1.00  0.00           C
ATOM   2552  O   ARG X 157     194.328 139.388 219.175  1.00  0.00           O
ATOM   2553  N   LYS X 158     192.802 137.761 218.851  1.00  0.00           N
ATOM   2554  H   LYS X 158     191.853 137.499 219.076  1.00  0.00           H
ATOM   2555  CA  LYS X 158     193.480 136.845 217.915  1.00  0.00           C
ATOM   2556  HA  LYS X 158     194.478 136.459 218.124  1.00  0.00           H
ATOM   2557  CB  LYS X 158     192.612 135.653 217.690  1.00  0.00           C
ATOM   2558  HB2 LYS X 158     191.699 136.023 217.222  1.00  0.00           H
ATOM   2559  HB3 LYS X 158     193.234 135.039 217.039  1.00  0.00           H
ATOM   2560  CG  LYS X 158     192.357 134.794 218.910  1.00  0.00           C
ATOM   2561  HG2 LYS X 158     193.338 134.622 219.353  1.00  0.00           H
ATOM   2562  HG3 LYS X 158     191.803 135.323 219.686  1.00  0.00           H
ATOM   2563  CD  LYS X 158     191.604 133.435 218.716  1.00  0.00           C
ATOM   2564  HD2 LYS X 158     190.613 133.645 218.315  1.00  0.00           H
ATOM   2565  HD3 LYS X 158     191.993 132.765 217.950  1.00  0.00           H
ATOM   2566  CE  LYS X 158     191.344 132.621 220.019  1.00  0.00           C
ATOM   2567  HE2 LYS X 158     192.254 132.305 220.530  1.00  0.00           H
ATOM   2568  HE3 LYS X 158     190.774 133.296 220.658  1.00  0.00           H
ATOM   2569  NZ  LYS X 158     190.621 131.322 219.753  1.00  0.00           N
ATOM   2570  HZ1 LYS X 158     190.444 130.900 220.654  1.00  0.00           H
ATOM   2571  HZ2 LYS X 158     191.265 130.700 219.285  1.00  0.00           H
ATOM   2572  HZ3 LYS X 158     189.761 131.376 219.226  1.00  0.00           H
ATOM   2573  C   LYS X 158     193.636 137.598 216.589  1.00  0.00           C
ATOM   2574  O   LYS X 158     194.676 137.329 215.968  1.00  0.00           O
ATOM   2575  N   THR X 159     192.776 138.477 216.146  1.00  0.00           N
ATOM   2576  H   THR X 159     191.895 138.585 216.628  1.00  0.00           H
ATOM   2577  CA  THR X 159     193.001 139.382 214.991  1.00  0.00           C
ATOM   2578  HA  THR X 159     192.996 138.670 214.166  1.00  0.00           H
ATOM   2579  CB  THR X 159     191.863 140.250 214.544  1.00  0.00           C
ATOM   2580  HB  THR X 159     192.155 140.710 213.599  1.00  0.00           H
ATOM   2581  CG2 THR X 159     190.527 139.504 214.365  1.00  0.00           C
ATOM   2582 HG21 THR X 159     189.713 140.183 214.110  1.00  0.00           H
ATOM   2583 HG22 THR X 159     190.272 139.014 215.305  1.00  0.00           H
ATOM   2584 HG23 THR X 159     190.724 138.733 213.621  1.00  0.00           H
ATOM   2585  OG1 THR X 159     191.561 141.321 215.463  1.00  0.00           O
ATOM   2586  HG1 THR X 159     191.263 140.981 216.310  1.00  0.00           H
ATOM   2587  C   THR X 159     194.288 140.255 214.966  1.00  0.00           C
ATOM   2588  O   THR X 159     194.828 140.375 213.873  1.00  0.00           O
ATOM   2589  N   LYS X 160     194.845 140.689 216.070  1.00  0.00           N
ATOM   2590  H   LYS X 160     194.310 140.473 216.899  1.00  0.00           H
ATOM   2591  CA  LYS X 160     196.092 141.414 216.215  1.00  0.00           C
ATOM   2592  HA  LYS X 160     196.021 141.801 217.232  1.00  0.00           H
ATOM   2593  CB  LYS X 160     197.275 140.454 216.066  1.00  0.00           C
ATOM   2594  HB2 LYS X 160     197.121 139.873 215.156  1.00  0.00           H
ATOM   2595  HB3 LYS X 160     198.186 141.040 215.942  1.00  0.00           H
ATOM   2596  CG  LYS X 160     197.421 139.478 217.256  1.00  0.00           C
ATOM   2597  HG2 LYS X 160     197.753 139.984 218.163  1.00  0.00           H
ATOM   2598  HG3 LYS X 160     196.476 138.956 217.409  1.00  0.00           H
ATOM   2599  CD  LYS X 160     198.370 138.359 216.934  1.00  0.00           C
ATOM   2600  HD2 LYS X 160     198.386 137.755 217.841  1.00  0.00           H
ATOM   2601  HD3 LYS X 160     197.962 137.660 216.204  1.00  0.00           H
ATOM   2602  CE  LYS X 160     199.824 138.847 216.487  1.00  0.00           C
ATOM   2603  HE2 LYS X 160     199.825 139.399 215.546  1.00  0.00           H
ATOM   2604  HE3 LYS X 160     200.308 139.520 217.195  1.00  0.00           H
ATOM   2605  NZ  LYS X 160     200.728 137.714 216.321  1.00  0.00           N
ATOM   2606  HZ1 LYS X 160     200.830 137.206 217.189  1.00  0.00           H
ATOM   2607  HZ2 LYS X 160     201.671 138.030 216.147  1.00  0.00           H
ATOM   2608  HZ3 LYS X 160     200.443 137.032 215.632  1.00  0.00           H
ATOM   2609  C   LYS X 160     196.144 142.635 215.301  1.00  0.00           C
ATOM   2610  O   LYS X 160     197.119 142.852 214.600  1.00  0.00           O
ATOM   2611  N   ALA X 161     195.105 143.416 215.278  1.00  0.00           N
ATOM   2612  H   ALA X 161     194.440 143.245 216.019  1.00  0.00           H
ATOM   2613  CA  ALA X 161     195.188 144.866 214.770  1.00  0.00           C
ATOM   2614  HA  ALA X 161     194.171 145.199 214.980  1.00  0.00           H
ATOM   2615  CB  ALA X 161     196.085 145.673 215.678  1.00  0.00           C
ATOM   2616  HB1 ALA X 161     195.937 146.728 215.448  1.00  0.00           H
ATOM   2617  HB2 ALA X 161     197.101 145.279 215.642  1.00  0.00           H
ATOM   2618  HB3 ALA X 161     195.502 145.535 216.589  1.00  0.00           H
ATOM   2619  C   ALA X 161     195.238 145.065 213.267  1.00  0.00           C
ATOM   2620  O   ALA X 161     195.594 146.129 212.796  1.00  0.00           O
ATOM   2621  N   SER X 162     194.920 144.007 212.509  1.00  0.00           N
ATOM   2622  H   SER X 162     194.713 143.223 213.111  1.00  0.00           H
ATOM   2623  CA  SER X 162     194.918 143.760 211.010  1.00  0.00           C
ATOM   2624  HA  SER X 162     195.509 144.518 210.498  1.00  0.00           H
ATOM   2625  CB  SER X 162     195.618 142.451 210.719  1.00  0.00           C
ATOM   2626  HB2 SER X 162     195.741 142.312 209.645  1.00  0.00           H
ATOM   2627  HB3 SER X 162     196.612 142.540 211.159  1.00  0.00           H
ATOM   2628  OG  SER X 162     194.958 141.265 211.163  1.00  0.00           O
ATOM   2629  HG  SER X 162     195.154 141.038 212.075  1.00  0.00           H
ATOM   2630  C   SER X 162     193.540 143.665 210.366  1.00  0.00           C
ATOM   2631  O   SER X 162     192.527 143.243 211.002  1.00  0.00           O
ATOM   2632  N   PRO X 163     193.312 144.094 209.117  1.00  0.00           N
ATOM   2633  CD  PRO X 163     194.328 144.581 208.175  1.00  0.00           C
ATOM   2634  HD2 PRO X 163     195.088 143.815 208.018  1.00  0.00           H
ATOM   2635  HD3 PRO X 163     194.792 145.542 208.398  1.00  0.00           H
ATOM   2636  CG  PRO X 163     193.597 144.665 206.877  1.00  0.00           C
ATOM   2637  HG2 PRO X 163     193.724 143.765 206.277  1.00  0.00           H
ATOM   2638  HG3 PRO X 163     193.950 145.550 206.347  1.00  0.00           H
ATOM   2639  CB  PRO X 163     192.166 144.886 207.292  1.00  0.00           C
ATOM   2640  HB2 PRO X 163     191.514 144.663 206.448  1.00  0.00           H
ATOM   2641  HB3 PRO X 163     192.080 145.966 207.412  1.00  0.00           H
ATOM   2642  CA  PRO X 163     191.985 144.174 208.615  1.00  0.00           C
ATOM   2643  HA  PRO X 163     191.384 144.800 209.274  1.00  0.00           H
ATOM   2644  C   PRO X 163     191.391 142.754 208.424  1.00  0.00           C
ATOM   2645  O   PRO X 163     191.898 141.843 207.775  1.00  0.00           O
ATOM   2646  N   CYS X 164     190.205 142.570 209.036  1.00  0.00           N
ATOM   2647  H   CYS X 164     189.865 143.196 209.752  1.00  0.00           H
ATOM   2648  CA  CYS X 164     189.463 141.256 209.097  1.00  0.00           C
ATOM   2649  HA  CYS X 164     189.769 140.670 208.231  1.00  0.00           H
ATOM   2650  CB  CYS X 164     189.798 140.491 210.345  1.00  0.00           C
ATOM   2651  HB2 CYS X 164     189.596 141.057 211.254  1.00  0.00           H
ATOM   2652  HB3 CYS X 164     189.084 139.671 210.255  1.00  0.00           H
ATOM   2653  SG  CYS X 164     191.549 140.096 210.390  1.00  0.00           S
ATOM   2654  HG  CYS X 164     191.809 141.230 209.732  1.00  0.00           H
ATOM   2655  C   CYS X 164     187.939 141.376 208.952  1.00  0.00           C
ATOM   2656  O   CYS X 164     187.373 142.320 209.443  1.00  0.00           O
ATOM   2657  N   ASP X 165     187.214 140.368 208.410  1.00  0.00           N
ATOM   2658  H   ASP X 165     187.603 139.569 207.930  1.00  0.00           H
ATOM   2659  CA  ASP X 165     185.756 140.357 208.419  1.00  0.00           C
ATOM   2660  HA  ASP X 165     185.374 141.302 208.033  1.00  0.00           H
ATOM   2661  CB  ASP X 165     185.254 139.354 207.334  1.00  0.00           C
ATOM   2662  HB2 ASP X 165     185.622 139.619 206.343  1.00  0.00           H
ATOM   2663  HB3 ASP X 165     185.700 138.363 207.418  1.00  0.00           H
ATOM   2664  CG  ASP X 165     183.762 139.202 207.184  1.00  0.00           C
ATOM   2665  OD1 ASP X 165     183.288 138.252 206.401  1.00  0.00           O
ATOM   2666  OD2 ASP X 165     183.006 139.918 207.939  1.00  0.00           O
ATOM   2667  C   ASP X 165     185.253 140.093 209.809  1.00  0.00           C
ATOM   2668  O   ASP X 165     185.554 138.985 210.312  1.00  0.00           O
ATOM   2669  N   PRO X 166     184.530 140.992 210.537  1.00  0.00           N
ATOM   2670  CD  PRO X 166     184.092 142.280 210.135  1.00  0.00           C
ATOM   2671  HD2 PRO X 166     183.696 142.421 209.130  1.00  0.00           H
ATOM   2672  HD3 PRO X 166     184.968 142.927 210.186  1.00  0.00           H
ATOM   2673  CG  PRO X 166     183.122 142.722 211.227  1.00  0.00           C
ATOM   2674  HG2 PRO X 166     182.103 142.477 210.929  1.00  0.00           H
ATOM   2675  HG3 PRO X 166     183.245 143.791 211.405  1.00  0.00           H
ATOM   2676  CB  PRO X 166     183.669 141.933 212.444  1.00  0.00           C
ATOM   2677  HB2 PRO X 166     182.859 141.768 213.154  1.00  0.00           H
ATOM   2678  HB3 PRO X 166     184.575 142.306 212.922  1.00  0.00           H
ATOM   2679  CA  PRO X 166     184.101 140.609 211.859  1.00  0.00           C
ATOM   2680  HA  PRO X 166     184.944 140.256 212.454  1.00  0.00           H
ATOM   2681  C   PRO X 166     182.934 139.647 211.924  1.00  0.00           C
ATOM   2682  O   PRO X 166     182.725 139.191 213.028  1.00  0.00           O
ATOM   2683  N   THR X 167     182.226 139.397 210.851  1.00  0.00           N
ATOM   2684  H   THR X 167     182.650 139.746 210.003  1.00  0.00           H
ATOM   2685  CA  THR X 167     180.851 138.757 210.856  1.00  0.00           C
ATOM   2686  HA  THR X 167     180.097 139.468 211.193  1.00  0.00           H
ATOM   2687  CB  THR X 167     180.503 138.275 209.510  1.00  0.00           C
ATOM   2688  HB  THR X 167     181.163 137.474 209.175  1.00  0.00           H
ATOM   2689  CG2 THR X 167     179.103 137.736 209.517  1.00  0.00           C
ATOM   2690 HG21 THR X 167     178.765 137.436 208.525  1.00  0.00           H
ATOM   2691 HG22 THR X 167     178.426 138.558 209.749  1.00  0.00           H
ATOM   2692 HG23 THR X 167     178.961 136.871 210.166  1.00  0.00           H
ATOM   2693  OG1 THR X 167     180.500 139.302 208.582  1.00  0.00           O
ATOM   2694  HG1 THR X 167     181.418 139.581 208.548  1.00  0.00           H
ATOM   2695  C   THR X 167     180.639 137.652 211.886  1.00  0.00           C
ATOM   2696  O   THR X 167     179.822 137.850 212.768  1.00  0.00           O
ATOM   2697  N   PHE X 168     181.445 136.600 211.837  1.00  0.00           N
ATOM   2698  H   PHE X 168     182.130 136.592 211.095  1.00  0.00           H
ATOM   2699  CA  PHE X 168     181.233 135.325 212.612  1.00  0.00           C
ATOM   2700  HA  PHE X 168     180.195 135.052 212.423  1.00  0.00           H
ATOM   2701  CB  PHE X 168     182.160 134.280 211.983  1.00  0.00           C
ATOM   2702  HB2 PHE X 168     182.179 134.303 210.894  1.00  0.00           H
ATOM   2703  HB3 PHE X 168     183.128 134.438 212.458  1.00  0.00           H
ATOM   2704  CG  PHE X 168     181.801 132.848 212.365  1.00  0.00           C
ATOM   2705  CD1 PHE X 168     182.415 132.363 213.532  1.00  0.00           C
ATOM   2706  HD1 PHE X 168     183.052 132.946 214.182  1.00  0.00           H
ATOM   2707  CE1 PHE X 168     182.307 130.973 213.815  1.00  0.00           C
ATOM   2708  HE1 PHE X 168     182.905 130.574 214.621  1.00  0.00           H
ATOM   2709  CZ  PHE X 168     181.604 130.106 212.899  1.00  0.00           C
ATOM   2710  HZ  PHE X 168     181.603 129.032 213.005  1.00  0.00           H
ATOM   2711  CE2 PHE X 168     180.978 130.637 211.773  1.00  0.00           C
ATOM   2712  HE2 PHE X 168     180.394 129.953 211.176  1.00  0.00           H
ATOM   2713  CD2 PHE X 168     180.988 132.022 211.618  1.00  0.00           C
ATOM   2714  HD2 PHE X 168     180.356 132.442 210.850  1.00  0.00           H
ATOM   2715  C   PHE X 168     181.526 135.525 214.089  1.00  0.00           C
ATOM   2716  O   PHE X 168     180.773 135.013 214.890  1.00  0.00           O
ATOM   2717  N   ILE X 169     182.658 136.246 214.409  1.00  0.00           N
ATOM   2718  H   ILE X 169     183.186 136.657 213.653  1.00  0.00           H
ATOM   2719  CA  ILE X 169     183.056 136.533 215.822  1.00  0.00           C
ATOM   2720  HA  ILE X 169     183.039 135.588 216.365  1.00  0.00           H
ATOM   2721  CB  ILE X 169     184.460 137.180 215.898  1.00  0.00           C
ATOM   2722  HB  ILE X 169     184.302 138.218 215.605  1.00  0.00           H
ATOM   2723  CG2 ILE X 169     185.006 137.305 217.349  1.00  0.00           C
ATOM   2724 HG21 ILE X 169     184.940 136.333 217.839  1.00  0.00           H
ATOM   2725 HG22 ILE X 169     184.378 137.882 218.028  1.00  0.00           H
ATOM   2726 HG23 ILE X 169     186.040 137.637 217.449  1.00  0.00           H
ATOM   2727  CG1 ILE X 169     185.644 136.650 214.990  1.00  0.00           C
ATOM   2728 HG12 ILE X 169     186.609 136.774 215.482  1.00  0.00           H
ATOM   2729 HG13 ILE X 169     185.459 135.585 214.848  1.00  0.00           H
ATOM   2730  CD1 ILE X 169     185.794 137.435 213.725  1.00  0.00           C
ATOM   2731 HD11 ILE X 169     186.162 138.460 213.751  1.00  0.00           H
ATOM   2732 HD12 ILE X 169     184.857 137.495 213.170  1.00  0.00           H
ATOM   2733 HD13 ILE X 169     186.449 136.784 213.146  1.00  0.00           H
ATOM   2734  C   ILE X 169     181.989 137.199 216.610  1.00  0.00           C
ATOM   2735  O   ILE X 169     181.569 136.765 217.690  1.00  0.00           O
ATOM   2736  N   LEU X 170     181.490 138.369 216.126  1.00  0.00           N
ATOM   2737  H   LEU X 170     181.766 138.708 215.216  1.00  0.00           H
ATOM   2738  CA  LEU X 170     180.464 139.112 216.707  1.00  0.00           C
ATOM   2739  HA  LEU X 170     180.693 139.398 217.734  1.00  0.00           H
ATOM   2740  CB  LEU X 170     180.389 140.447 215.977  1.00  0.00           C
ATOM   2741  HB2 LEU X 170     180.031 140.275 214.962  1.00  0.00           H
ATOM   2742  HB3 LEU X 170     179.671 141.089 216.487  1.00  0.00           H
ATOM   2743  CG  LEU X 170     181.644 141.321 215.777  1.00  0.00           C
ATOM   2744  HG  LEU X 170     182.337 140.683 215.229  1.00  0.00           H
ATOM   2745  CD1 LEU X 170     181.324 142.642 215.142  1.00  0.00           C
ATOM   2746 HD11 LEU X 170     182.149 143.325 214.937  1.00  0.00           H
ATOM   2747 HD12 LEU X 170     180.643 143.130 215.840  1.00  0.00           H
ATOM   2748 HD13 LEU X 170     180.809 142.423 214.207  1.00  0.00           H
ATOM   2749  CD2 LEU X 170     182.349 141.666 217.102  1.00  0.00           C
ATOM   2750 HD21 LEU X 170     183.211 142.313 216.935  1.00  0.00           H
ATOM   2751 HD22 LEU X 170     181.630 142.203 217.721  1.00  0.00           H
ATOM   2752 HD23 LEU X 170     182.799 140.799 217.587  1.00  0.00           H
ATOM   2753  C   LEU X 170     179.164 138.414 216.632  1.00  0.00           C
ATOM   2754  O   LEU X 170     178.422 138.672 217.588  1.00  0.00           O
ATOM   2755  N   GLY X 171     178.908 137.501 215.692  1.00  0.00           N
ATOM   2756  H   GLY X 171     179.582 137.400 214.948  1.00  0.00           H
ATOM   2757  CA  GLY X 171     177.657 136.671 215.865  1.00  0.00           C
ATOM   2758  HA2 GLY X 171     176.828 137.336 216.107  1.00  0.00           H
ATOM   2759  HA3 GLY X 171     177.381 136.263 214.893  1.00  0.00           H
ATOM   2760  C   GLY X 171     177.730 135.396 216.720  1.00  0.00           C
ATOM   2761  O   GLY X 171     176.743 134.728 216.914  1.00  0.00           O
ATOM   2762  N   CYS X 172     178.958 134.978 217.137  1.00  0.00           N
ATOM   2763  H   CYS X 172     179.732 135.501 216.752  1.00  0.00           H
ATOM   2764  CA  CYS X 172     179.175 133.892 218.057  1.00  0.00           C
ATOM   2765  HA  CYS X 172     178.656 132.992 217.727  1.00  0.00           H
ATOM   2766  CB  CYS X 172     180.633 133.480 218.083  1.00  0.00           C
ATOM   2767  HB2 CYS X 172     181.229 134.350 218.358  1.00  0.00           H
ATOM   2768  HB3 CYS X 172     180.819 132.744 218.864  1.00  0.00           H
ATOM   2769  SG  CYS X 172     181.338 132.560 216.616  1.00  0.00           S
ATOM   2770  HG  CYS X 172     180.975 133.447 215.685  1.00  0.00           H
ATOM   2771  C   CYS X 172     178.641 134.226 219.485  1.00  0.00           C
ATOM   2772  O   CYS X 172     178.001 133.417 220.111  1.00  0.00           O
ATOM   2773  N   ALA X 173     179.050 135.414 220.028  1.00  0.00           N
ATOM   2774  H   ALA X 173     179.472 136.034 219.352  1.00  0.00           H
ATOM   2775  CA  ALA X 173     178.610 135.878 221.391  1.00  0.00           C
ATOM   2776  HA  ALA X 173     178.849 135.130 222.147  1.00  0.00           H
ATOM   2777  CB  ALA X 173     179.392 137.128 221.770  1.00  0.00           C
ATOM   2778  HB1 ALA X 173     178.917 137.529 222.666  1.00  0.00           H
ATOM   2779  HB2 ALA X 173     179.421 137.880 220.982  1.00  0.00           H
ATOM   2780  HB3 ALA X 173     180.407 136.840 222.042  1.00  0.00           H
ATOM   2781  C   ALA X 173     177.068 135.946 221.565  1.00  0.00           C
ATOM   2782  O   ALA X 173     176.601 135.448 222.622  1.00  0.00           O
ATOM   2783  N   PRO X 174     176.306 136.359 220.545  1.00  0.00           N
ATOM   2784  CD  PRO X 174     176.682 137.127 219.439  1.00  0.00           C
ATOM   2785  HD2 PRO X 174     176.889 136.434 218.624  1.00  0.00           H
ATOM   2786  HD3 PRO X 174     177.650 137.571 219.671  1.00  0.00           H
ATOM   2787  CG  PRO X 174     175.666 138.155 218.994  1.00  0.00           C
ATOM   2788  HG2 PRO X 174     175.704 138.206 217.905  1.00  0.00           H
ATOM   2789  HG3 PRO X 174     175.746 139.088 219.551  1.00  0.00           H
ATOM   2790  CB  PRO X 174     174.405 137.313 219.400  1.00  0.00           C
ATOM   2791  HB2 PRO X 174     174.243 136.580 218.610  1.00  0.00           H
ATOM   2792  HB3 PRO X 174     173.632 138.049 219.622  1.00  0.00           H
ATOM   2793  CA  PRO X 174     174.839 136.504 220.636  1.00  0.00           C
ATOM   2794  HA  PRO X 174     174.598 137.058 221.544  1.00  0.00           H
ATOM   2795  C   PRO X 174     174.110 135.132 220.737  1.00  0.00           C
ATOM   2796  O   PRO X 174     173.193 134.832 221.487  1.00  0.00           O
ATOM   2797  N   CYS X 175     174.557 134.207 219.942  1.00  0.00           N
ATOM   2798  H   CYS X 175     175.337 134.448 219.347  1.00  0.00           H
ATOM   2799  CA  CYS X 175     174.122 132.868 219.765  1.00  0.00           C
ATOM   2800  HA  CYS X 175     173.053 132.988 219.588  1.00  0.00           H
ATOM   2801  CB  CYS X 175     174.750 132.204 218.544  1.00  0.00           C
ATOM   2802  HB2 CYS X 175     174.589 132.848 217.679  1.00  0.00           H
ATOM   2803  HB3 CYS X 175     175.773 132.008 218.866  1.00  0.00           H
ATOM   2804  SG  CYS X 175     174.001 130.576 218.208  1.00  0.00           S
ATOM   2805  HG  CYS X 175     172.821 131.052 217.803  1.00  0.00           H
ATOM   2806  C   CYS X 175     174.344 132.189 221.106  1.00  0.00           C
ATOM   2807  O   CYS X 175     173.446 131.570 221.651  1.00  0.00           O
ATOM   2808  N   ASN X 176     175.550 132.243 221.731  1.00  0.00           N
ATOM   2809  H   ASN X 176     176.347 132.759 221.385  1.00  0.00           H
ATOM   2810  CA  ASN X 176     175.800 131.498 222.942  1.00  0.00           C
ATOM   2811  HA  ASN X 176     175.388 130.517 222.705  1.00  0.00           H
ATOM   2812  CB  ASN X 176     177.303 131.355 223.141  1.00  0.00           C
ATOM   2813  HB2 ASN X 176     177.777 131.061 222.205  1.00  0.00           H
ATOM   2814  HB3 ASN X 176     177.802 132.219 223.580  1.00  0.00           H
ATOM   2815  CG  ASN X 176     177.517 130.140 224.159  1.00  0.00           C
ATOM   2816  OD1 ASN X 176     176.920 129.088 224.227  1.00  0.00           O
ATOM   2817  ND2 ASN X 176     178.569 130.298 224.979  1.00  0.00           N
ATOM   2818 HD21 ASN X 176     179.028 131.197 224.960  1.00  0.00           H
ATOM   2819 HD22 ASN X 176     179.061 129.474 225.294  1.00  0.00           H
ATOM   2820  C   ASN X 176     175.103 132.100 224.108  1.00  0.00           C
ATOM   2821  O   ASN X 176     174.955 131.448 225.117  1.00  0.00           O
ATOM   2822  N   VAL X 177     174.875 133.468 224.081  1.00  0.00           N
ATOM   2823  H   VAL X 177     175.277 134.019 223.336  1.00  0.00           H
ATOM   2824  CA  VAL X 177     174.004 134.118 225.107  1.00  0.00           C
ATOM   2825  HA  VAL X 177     174.454 133.944 226.085  1.00  0.00           H
ATOM   2826  CB  VAL X 177     173.804 135.621 224.821  1.00  0.00           C
ATOM   2827  HB  VAL X 177     173.784 135.715 223.736  1.00  0.00           H
ATOM   2828  CG1 VAL X 177     172.445 136.087 225.498  1.00  0.00           C
ATOM   2829 HG11 VAL X 177     171.561 135.711 224.983  1.00  0.00           H
ATOM   2830 HG12 VAL X 177     172.389 135.858 226.562  1.00  0.00           H
ATOM   2831 HG13 VAL X 177     172.372 137.170 225.394  1.00  0.00           H
ATOM   2832  CG2 VAL X 177     174.891 136.532 225.453  1.00  0.00           C
ATOM   2833 HG21 VAL X 177     175.758 136.514 224.793  1.00  0.00           H
ATOM   2834 HG22 VAL X 177     175.078 136.086 226.430  1.00  0.00           H
ATOM   2835 HG23 VAL X 177     174.455 137.514 225.639  1.00  0.00           H
ATOM   2836  C   VAL X 177     172.667 133.355 225.174  1.00  0.00           C
ATOM   2837  O   VAL X 177     172.474 132.893 226.306  1.00  0.00           O
ATOM   2838  N   ILE X 178     171.966 133.100 224.038  1.00  0.00           N
ATOM   2839  H   ILE X 178     172.268 133.649 223.246  1.00  0.00           H
ATOM   2840  CA  ILE X 178     170.650 132.304 224.130  1.00  0.00           C
ATOM   2841  HA  ILE X 178     170.114 132.715 224.986  1.00  0.00           H
ATOM   2842  CB  ILE X 178     169.715 132.622 222.957  1.00  0.00           C
ATOM   2843  HB  ILE X 178     169.491 133.665 222.734  1.00  0.00           H
ATOM   2844  CG2 ILE X 178     170.297 132.127 221.652  1.00  0.00           C
ATOM   2845 HG21 ILE X 178     169.539 132.291 220.886  1.00  0.00           H
ATOM   2846 HG22 ILE X 178     170.700 131.115 221.695  1.00  0.00           H
ATOM   2847 HG23 ILE X 178     171.132 132.817 221.530  1.00  0.00           H
ATOM   2848  CG1 ILE X 178     168.317 131.932 223.026  1.00  0.00           C
ATOM   2849 HG12 ILE X 178     167.822 132.190 222.089  1.00  0.00           H
ATOM   2850 HG13 ILE X 178     168.235 130.862 223.218  1.00  0.00           H
ATOM   2851  CD1 ILE X 178     167.361 132.565 224.073  1.00  0.00           C
ATOM   2852 HD11 ILE X 178     167.729 132.366 225.080  1.00  0.00           H
ATOM   2853 HD12 ILE X 178     166.327 132.222 224.019  1.00  0.00           H
ATOM   2854 HD13 ILE X 178     167.456 133.643 223.939  1.00  0.00           H
ATOM   2855  C   ILE X 178     170.873 130.829 224.360  1.00  0.00           C
ATOM   2856  O   ILE X 178     170.055 130.316 225.131  1.00  0.00           O
ATOM   2857  N   CYS X 179     171.969 130.204 223.919  1.00  0.00           N
ATOM   2858  H   CYS X 179     172.742 130.669 223.464  1.00  0.00           H
ATOM   2859  CA  CYS X 179     172.259 128.865 224.620  1.00  0.00           C
ATOM   2860  HA  CYS X 179     171.538 128.079 224.396  1.00  0.00           H
ATOM   2861  CB  CYS X 179     173.662 128.446 224.171  1.00  0.00           C
ATOM   2862  HB2 CYS X 179     174.410 129.222 224.335  1.00  0.00           H
ATOM   2863  HB3 CYS X 179     173.909 127.583 224.789  1.00  0.00           H
ATOM   2864  SG  CYS X 179     173.560 128.073 222.404  1.00  0.00           S
ATOM   2865  HG  CYS X 179     173.079 129.233 221.946  1.00  0.00           H
ATOM   2866  C   CYS X 179     172.331 128.821 226.160  1.00  0.00           C
ATOM   2867  O   CYS X 179     171.625 127.980 226.684  1.00  0.00           O
ATOM   2868  N   SER X 180     173.077 129.780 226.767  1.00  0.00           N
ATOM   2869  H   SER X 180     173.680 130.422 226.272  1.00  0.00           H
ATOM   2870  CA  SER X 180     173.181 129.918 228.198  1.00  0.00           C
ATOM   2871  HA  SER X 180     173.401 128.951 228.650  1.00  0.00           H
ATOM   2872  CB  SER X 180     174.366 130.886 228.384  1.00  0.00           C
ATOM   2873  HB2 SER X 180     175.297 130.673 227.859  1.00  0.00           H
ATOM   2874  HB3 SER X 180     174.001 131.838 227.997  1.00  0.00           H
ATOM   2875  OG  SER X 180     174.621 131.099 229.700  1.00  0.00           O
ATOM   2876  HG  SER X 180     175.360 131.711 229.742  1.00  0.00           H
ATOM   2877  C   SER X 180     171.856 130.389 228.830  1.00  0.00           C
ATOM   2878  O   SER X 180     171.647 130.125 230.007  1.00  0.00           O
ATOM   2879  N   ILE X 181     170.842 130.900 228.043  1.00  0.00           N
ATOM   2880  H   ILE X 181     171.015 131.083 227.065  1.00  0.00           H
ATOM   2881  CA  ILE X 181     169.541 131.279 228.598  1.00  0.00           C
ATOM   2882  HA  ILE X 181     169.625 131.664 229.614  1.00  0.00           H
ATOM   2883  CB  ILE X 181     168.940 132.490 227.800  1.00  0.00           C
ATOM   2884  HB  ILE X 181     169.217 132.128 226.810  1.00  0.00           H
ATOM   2885  CG2 ILE X 181     167.402 132.619 227.823  1.00  0.00           C
ATOM   2886 HG21 ILE X 181     166.926 131.887 227.170  1.00  0.00           H
ATOM   2887 HG22 ILE X 181     167.075 133.571 227.403  1.00  0.00           H
ATOM   2888 HG23 ILE X 181     167.011 132.499 228.833  1.00  0.00           H
ATOM   2889  CG1 ILE X 181     169.842 133.721 228.142  1.00  0.00           C
ATOM   2890 HG12 ILE X 181     169.855 133.827 229.226  1.00  0.00           H
ATOM   2891 HG13 ILE X 181     170.869 133.523 227.837  1.00  0.00           H
ATOM   2892  CD1 ILE X 181     169.436 135.062 227.572  1.00  0.00           C
ATOM   2893 HD11 ILE X 181     168.461 135.345 227.970  1.00  0.00           H
ATOM   2894 HD12 ILE X 181     169.471 134.981 226.486  1.00  0.00           H
ATOM   2895 HD13 ILE X 181     170.173 135.790 227.911  1.00  0.00           H
ATOM   2896  C   ILE X 181     168.506 130.143 228.628  1.00  0.00           C
ATOM   2897  O   ILE X 181     167.773 129.808 229.601  1.00  0.00           O
ATOM   2898  N   ILE X 182     168.482 129.386 227.507  1.00  0.00           N
ATOM   2899  H   ILE X 182     169.189 129.517 226.797  1.00  0.00           H
ATOM   2900  CA  ILE X 182     167.612 128.251 227.245  1.00  0.00           C
ATOM   2901  HA  ILE X 182     166.662 128.529 227.701  1.00  0.00           H
ATOM   2902  CB  ILE X 182     167.288 127.950 225.770  1.00  0.00           C
ATOM   2903  HB  ILE X 182     168.181 127.749 225.179  1.00  0.00           H
ATOM   2904  CG2 ILE X 182     166.327 126.698 225.621  1.00  0.00           C
ATOM   2905 HG21 ILE X 182     166.802 125.813 226.044  1.00  0.00           H
ATOM   2906 HG22 ILE X 182     166.132 126.457 224.577  1.00  0.00           H
ATOM   2907 HG23 ILE X 182     165.420 126.848 226.207  1.00  0.00           H
ATOM   2908  CG1 ILE X 182     166.630 129.062 225.031  1.00  0.00           C
ATOM   2909 HG12 ILE X 182     167.279 129.937 225.008  1.00  0.00           H
ATOM   2910 HG13 ILE X 182     166.456 128.824 223.982  1.00  0.00           H
ATOM   2911  CD1 ILE X 182     165.269 129.524 225.489  1.00  0.00           C
ATOM   2912 HD11 ILE X 182     164.428 128.921 225.145  1.00  0.00           H
ATOM   2913 HD12 ILE X 182     165.157 130.549 225.134  1.00  0.00           H
ATOM   2914 HD13 ILE X 182     165.196 129.583 226.575  1.00  0.00           H
ATOM   2915  C   ILE X 182     168.136 126.960 228.009  1.00  0.00           C
ATOM   2916  O   ILE X 182     167.380 126.284 228.678  1.00  0.00           O
ATOM   2917  N   PHE X 183     169.419 126.688 227.838  1.00  0.00           N
ATOM   2918  H   PHE X 183     169.948 127.313 227.247  1.00  0.00           H
ATOM   2919  CA  PHE X 183     170.102 125.555 228.436  1.00  0.00           C
ATOM   2920  HA  PHE X 183     169.351 124.779 228.585  1.00  0.00           H
ATOM   2921  CB  PHE X 183     171.023 124.986 227.372  1.00  0.00           C
ATOM   2922  HB2 PHE X 183     171.965 125.526 227.287  1.00  0.00           H
ATOM   2923  HB3 PHE X 183     171.524 124.036 227.559  1.00  0.00           H
ATOM   2924  CG  PHE X 183     170.443 124.825 226.029  1.00  0.00           C
ATOM   2925  CD1 PHE X 183     171.166 125.233 224.848  1.00  0.00           C
ATOM   2926  HD1 PHE X 183     172.171 125.613 224.959  1.00  0.00           H
ATOM   2927  CE1 PHE X 183     170.581 125.174 223.594  1.00  0.00           C
ATOM   2928  HE1 PHE X 183     171.143 125.524 222.741  1.00  0.00           H
ATOM   2929  CZ  PHE X 183     169.265 124.702 223.471  1.00  0.00           C
ATOM   2930  HZ  PHE X 183     168.840 124.561 222.488  1.00  0.00           H
ATOM   2931  CE2 PHE X 183     168.554 124.173 224.580  1.00  0.00           C
ATOM   2932  HE2 PHE X 183     167.558 123.785 224.429  1.00  0.00           H
ATOM   2933  CD2 PHE X 183     169.244 124.166 225.803  1.00  0.00           C
ATOM   2934  HD2 PHE X 183     168.722 123.785 226.668  1.00  0.00           H
ATOM   2935  C   PHE X 183     170.809 125.869 229.767  1.00  0.00           C
ATOM   2936  O   PHE X 183     171.232 126.969 230.100  1.00  0.00           O
ATOM   2937  N   GLN X 184     171.098 124.724 230.513  1.00  0.00           N
ATOM   2938  H   GLN X 184     170.729 123.875 230.110  1.00  0.00           H
ATOM   2939  CA  GLN X 184     171.711 124.675 231.885  1.00  0.00           C
ATOM   2940  HA  GLN X 184     171.180 125.397 232.506  1.00  0.00           H
ATOM   2941  CB  GLN X 184     171.524 123.309 232.627  1.00  0.00           C
ATOM   2942  HB2 GLN X 184     170.742 122.737 232.127  1.00  0.00           H
ATOM   2943  HB3 GLN X 184     172.427 122.701 232.687  1.00  0.00           H
ATOM   2944  CG  GLN X 184     171.156 123.550 234.070  1.00  0.00           C
ATOM   2945  HG2 GLN X 184     171.660 124.464 234.385  1.00  0.00           H
ATOM   2946  HG3 GLN X 184     170.107 123.846 234.053  1.00  0.00           H
ATOM   2947  CD  GLN X 184     171.447 122.375 235.051  1.00  0.00           C
ATOM   2948  OE1 GLN X 184     172.123 122.535 236.039  1.00  0.00           O
ATOM   2949  NE2 GLN X 184     170.903 121.165 234.834  1.00  0.00           N
ATOM   2950 HE21 GLN X 184     171.048 120.422 235.503  1.00  0.00           H
ATOM   2951 HE22 GLN X 184     170.344 121.037 234.003  1.00  0.00           H
ATOM   2952  C   GLN X 184     173.146 125.229 231.844  1.00  0.00           C
ATOM   2953  O   GLN X 184     173.552 125.663 232.940  1.00  0.00           O
ATOM   2954  N   LYS X 185     173.966 125.129 230.765  1.00  0.00           N
ATOM   2955  H   LYS X 185     173.683 124.626 229.936  1.00  0.00           H
ATOM   2956  CA  LYS X 185     175.252 125.788 230.739  1.00  0.00           C
ATOM   2957  HA  LYS X 185     175.209 126.723 231.298  1.00  0.00           H
ATOM   2958  CB  LYS X 185     176.385 124.984 231.440  1.00  0.00           C
ATOM   2959  HB2 LYS X 185     176.025 124.533 232.365  1.00  0.00           H
ATOM   2960  HB3 LYS X 185     176.728 124.210 230.753  1.00  0.00           H
ATOM   2961  CG  LYS X 185     177.711 125.798 231.710  1.00  0.00           C
ATOM   2962  HG2 LYS X 185     178.067 126.393 230.869  1.00  0.00           H
ATOM   2963  HG3 LYS X 185     177.478 126.531 232.482  1.00  0.00           H
ATOM   2964  CD  LYS X 185     178.829 124.920 232.311  1.00  0.00           C
ATOM   2965  HD2 LYS X 185     179.641 125.507 232.740  1.00  0.00           H
ATOM   2966  HD3 LYS X 185     178.434 124.384 233.175  1.00  0.00           H
ATOM   2967  CE  LYS X 185     179.389 123.985 231.249  1.00  0.00           C
ATOM   2968  HE2 LYS X 185     178.560 123.356 230.924  1.00  0.00           H
ATOM   2969  HE3 LYS X 185     179.820 124.450 230.362  1.00  0.00           H
ATOM   2970  NZ  LYS X 185     180.457 123.086 231.775  1.00  0.00           N
ATOM   2971  HZ1 LYS X 185     180.212 122.410 232.483  1.00  0.00           H
ATOM   2972  HZ2 LYS X 185     181.143 123.695 232.198  1.00  0.00           H
ATOM   2973  HZ3 LYS X 185     180.894 122.544 231.043  1.00  0.00           H
ATOM   2974  C   LYS X 185     175.755 126.157 229.295  1.00  0.00           C
ATOM   2975  O   LYS X 185     175.503 125.415 228.301  1.00  0.00           O
ATOM   2976  N   ARG X 186     176.380 127.268 229.197  1.00  0.00           N
ATOM   2977  H   ARG X 186     176.466 127.822 230.037  1.00  0.00           H
ATOM   2978  CA  ARG X 186     177.005 127.901 228.054  1.00  0.00           C
ATOM   2979  HA  ARG X 186     176.210 128.240 227.389  1.00  0.00           H
ATOM   2980  CB  ARG X 186     177.718 129.215 228.576  1.00  0.00           C
ATOM   2981  HB2 ARG X 186     177.903 129.764 227.653  1.00  0.00           H
ATOM   2982  HB3 ARG X 186     177.127 129.857 229.229  1.00  0.00           H
ATOM   2983  CG  ARG X 186     179.072 129.044 229.344  1.00  0.00           C
ATOM   2984  HG2 ARG X 186     178.753 128.571 230.272  1.00  0.00           H
ATOM   2985  HG3 ARG X 186     179.765 128.388 228.817  1.00  0.00           H
ATOM   2986  CD  ARG X 186     179.822 130.362 229.510  1.00  0.00           C
ATOM   2987  HD2 ARG X 186     179.357 131.045 230.220  1.00  0.00           H
ATOM   2988  HD3 ARG X 186     180.781 130.164 229.988  1.00  0.00           H
ATOM   2989  NE  ARG X 186     180.169 131.119 228.265  1.00  0.00           N
ATOM   2990  HE  ARG X 186     179.398 131.736 228.056  1.00  0.00           H
ATOM   2991  CZ  ARG X 186     181.228 130.898 227.471  1.00  0.00           C
ATOM   2992  NH1 ARG X 186     182.160 130.052 227.755  1.00  0.00           N
ATOM   2993 HH11 ARG X 186     182.185 129.698 228.701  1.00  0.00           H
ATOM   2994 HH12 ARG X 186     182.854 129.970 227.026  1.00  0.00           H
ATOM   2995  NH2 ARG X 186     181.314 131.609 226.375  1.00  0.00           N
ATOM   2996 HH21 ARG X 186     180.686 132.356 226.115  1.00  0.00           H
ATOM   2997 HH22 ARG X 186     182.150 131.507 225.818  1.00  0.00           H
ATOM   2998  C   ARG X 186     178.000 126.886 227.485  1.00  0.00           C
ATOM   2999  O   ARG X 186     178.704 126.112 228.159  1.00  0.00           O
ATOM   3000  N   PHE X 187     178.089 126.932 226.148  1.00  0.00           N
ATOM   3001  H   PHE X 187     177.440 127.573 225.714  1.00  0.00           H
ATOM   3002  CA  PHE X 187     179.253 126.238 225.460  1.00  0.00           C
ATOM   3003  HA  PHE X 187     179.592 125.508 226.196  1.00  0.00           H
ATOM   3004  CB  PHE X 187     178.875 125.639 224.141  1.00  0.00           C
ATOM   3005  HB2 PHE X 187     178.891 126.455 223.418  1.00  0.00           H
ATOM   3006  HB3 PHE X 187     179.640 124.938 223.805  1.00  0.00           H
ATOM   3007  CG  PHE X 187     177.612 124.855 224.023  1.00  0.00           C
ATOM   3008  CD1 PHE X 187     177.639 123.435 224.156  1.00  0.00           C
ATOM   3009  HD1 PHE X 187     178.578 122.926 224.322  1.00  0.00           H
ATOM   3010  CE1 PHE X 187     176.459 122.679 223.917  1.00  0.00           C
ATOM   3011  HE1 PHE X 187     176.582 121.611 224.021  1.00  0.00           H
ATOM   3012  CZ  PHE X 187     175.213 123.384 223.652  1.00  0.00           C
ATOM   3013  HZ  PHE X 187     174.350 122.760 223.473  1.00  0.00           H
ATOM   3014  CE2 PHE X 187     175.241 124.762 223.388  1.00  0.00           C
ATOM   3015  HE2 PHE X 187     174.321 125.256 223.112  1.00  0.00           H
ATOM   3016  CD2 PHE X 187     176.385 125.509 223.633  1.00  0.00           C
ATOM   3017  HD2 PHE X 187     176.336 126.567 223.423  1.00  0.00           H
ATOM   3018  C   PHE X 187     180.434 127.201 225.363  1.00  0.00           C
ATOM   3019  O   PHE X 187     180.330 128.358 225.765  1.00  0.00           O
ATOM   3020  N   ASP X 188     181.557 126.695 224.821  1.00  0.00           N
ATOM   3021  H   ASP X 188     181.491 125.790 224.376  1.00  0.00           H
ATOM   3022  CA  ASP X 188     182.852 127.374 224.591  1.00  0.00           C
ATOM   3023  HA  ASP X 188     182.805 128.370 225.030  1.00  0.00           H
ATOM   3024  CB  ASP X 188     184.068 126.590 225.173  1.00  0.00           C
ATOM   3025  HB2 ASP X 188     183.999 126.477 226.255  1.00  0.00           H
ATOM   3026  HB3 ASP X 188     184.009 125.591 224.742  1.00  0.00           H
ATOM   3027  CG  ASP X 188     185.458 127.226 224.968  1.00  0.00           C
ATOM   3028  OD1 ASP X 188     186.465 126.680 225.536  1.00  0.00           O
ATOM   3029  OD2 ASP X 188     185.586 128.309 224.367  1.00  0.00           O
ATOM   3030  C   ASP X 188     182.946 127.676 223.096  1.00  0.00           C
ATOM   3031  O   ASP X 188     182.600 126.788 222.207  1.00  0.00           O
ATOM   3032  N   TYR X 189     183.373 128.868 222.668  1.00  0.00           N
ATOM   3033  H   TYR X 189     183.592 129.618 223.308  1.00  0.00           H
ATOM   3034  CA  TYR X 189     183.492 129.255 221.181  1.00  0.00           C
ATOM   3035  HA  TYR X 189     182.497 129.147 220.750  1.00  0.00           H
ATOM   3036  CB  TYR X 189     183.819 130.732 220.925  1.00  0.00           C
ATOM   3037  HB2 TYR X 189     184.844 130.900 221.256  1.00  0.00           H
ATOM   3038  HB3 TYR X 189     183.822 130.835 219.840  1.00  0.00           H
ATOM   3039  CG  TYR X 189     182.896 131.842 221.532  1.00  0.00           C
ATOM   3040  CD1 TYR X 189     183.295 133.137 221.452  1.00  0.00           C
ATOM   3041  HD1 TYR X 189     184.178 133.298 220.853  1.00  0.00           H
ATOM   3042  CE1 TYR X 189     182.639 134.186 222.171  1.00  0.00           C
ATOM   3043  HE1 TYR X 189     183.066 135.173 222.266  1.00  0.00           H
ATOM   3044  CZ  TYR X 189     181.454 133.802 222.857  1.00  0.00           C
ATOM   3045  OH  TYR X 189     180.876 134.828 223.556  1.00  0.00           O
ATOM   3046  HH  TYR X 189     180.139 134.647 224.145  1.00  0.00           H
ATOM   3047  CE2 TYR X 189     180.942 132.502 222.868  1.00  0.00           C
ATOM   3048  HE2 TYR X 189     180.029 132.213 223.368  1.00  0.00           H
ATOM   3049  CD2 TYR X 189     181.697 131.546 222.172  1.00  0.00           C
ATOM   3050  HD2 TYR X 189     181.293 130.548 222.081  1.00  0.00           H
ATOM   3051  C   TYR X 189     184.492 128.444 220.457  1.00  0.00           C
ATOM   3052  O   TYR X 189     184.513 128.481 219.231  1.00  0.00           O
ATOM   3053  N   LYS X 190     185.275 127.592 221.170  1.00  0.00           N
ATOM   3054  H   LYS X 190     185.160 127.624 222.173  1.00  0.00           H
ATOM   3055  CA  LYS X 190     186.083 126.534 220.582  1.00  0.00           C
ATOM   3056  HA  LYS X 190     186.649 126.988 219.769  1.00  0.00           H
ATOM   3057  CB  LYS X 190     187.036 126.124 221.754  1.00  0.00           C
ATOM   3058  HB2 LYS X 190     187.398 127.089 222.109  1.00  0.00           H
ATOM   3059  HB3 LYS X 190     186.458 125.719 222.585  1.00  0.00           H
ATOM   3060  CG  LYS X 190     188.214 125.148 221.331  1.00  0.00           C
ATOM   3061  HG2 LYS X 190     188.703 124.662 222.175  1.00  0.00           H
ATOM   3062  HG3 LYS X 190     187.676 124.347 220.823  1.00  0.00           H
ATOM   3063  CD  LYS X 190     189.329 125.724 220.473  1.00  0.00           C
ATOM   3064  HD2 LYS X 190     189.929 124.866 220.171  1.00  0.00           H
ATOM   3065  HD3 LYS X 190     188.828 126.230 219.647  1.00  0.00           H
ATOM   3066  CE  LYS X 190     190.193 126.768 221.217  1.00  0.00           C
ATOM   3067  HE2 LYS X 190     190.845 127.281 220.510  1.00  0.00           H
ATOM   3068  HE3 LYS X 190     189.493 127.512 221.597  1.00  0.00           H
ATOM   3069  NZ  LYS X 190     190.883 126.206 222.405  1.00  0.00           N
ATOM   3070  HZ1 LYS X 190     191.473 126.955 222.739  1.00  0.00           H
ATOM   3071  HZ2 LYS X 190     191.546 125.455 222.279  1.00  0.00           H
ATOM   3072  HZ3 LYS X 190     190.275 125.870 223.138  1.00  0.00           H
ATOM   3073  C   LYS X 190     185.318 125.286 220.048  1.00  0.00           C
ATOM   3074  O   LYS X 190     185.839 124.564 219.174  1.00  0.00           O
ATOM   3075  N   ASP X 191     184.158 124.966 220.519  1.00  0.00           N
ATOM   3076  H   ASP X 191     183.789 125.627 221.187  1.00  0.00           H
ATOM   3077  CA  ASP X 191     183.486 123.616 220.501  1.00  0.00           C
ATOM   3078  HA  ASP X 191     184.184 122.790 220.639  1.00  0.00           H
ATOM   3079  CB  ASP X 191     182.406 123.491 221.615  1.00  0.00           C
ATOM   3080  HB2 ASP X 191     182.849 123.921 222.514  1.00  0.00           H
ATOM   3081  HB3 ASP X 191     181.621 124.191 221.329  1.00  0.00           H
ATOM   3082  CG  ASP X 191     181.876 122.138 221.905  1.00  0.00           C
ATOM   3083  OD1 ASP X 191     181.091 122.150 222.839  1.00  0.00           O
ATOM   3084  OD2 ASP X 191     182.162 121.148 221.266  1.00  0.00           O
ATOM   3085  C   ASP X 191     182.907 123.414 219.065  1.00  0.00           C
ATOM   3086  O   ASP X 191     182.106 124.193 218.579  1.00  0.00           O
ATOM   3087  N   GLN X 192     183.112 122.252 218.512  1.00  0.00           N
ATOM   3088  H   GLN X 192     183.678 121.584 219.016  1.00  0.00           H
ATOM   3089  CA  GLN X 192     182.523 121.912 217.217  1.00  0.00           C
ATOM   3090  HA  GLN X 192     182.552 122.796 216.580  1.00  0.00           H
ATOM   3091  CB  GLN X 192     183.262 120.740 216.533  1.00  0.00           C
ATOM   3092  HB2 GLN X 192     184.328 120.897 216.701  1.00  0.00           H
ATOM   3093  HB3 GLN X 192     183.129 119.794 217.058  1.00  0.00           H
ATOM   3094  CG  GLN X 192     182.944 120.637 215.059  1.00  0.00           C
ATOM   3095  HG2 GLN X 192     183.447 119.801 214.573  1.00  0.00           H
ATOM   3096  HG3 GLN X 192     181.912 120.428 214.778  1.00  0.00           H
ATOM   3097  CD  GLN X 192     183.480 121.823 214.250  1.00  0.00           C
ATOM   3098  OE1 GLN X 192     184.433 122.559 214.622  1.00  0.00           O
ATOM   3099  NE2 GLN X 192     182.677 122.242 213.283  1.00  0.00           N
ATOM   3100 HE21 GLN X 192     182.945 123.064 212.761  1.00  0.00           H
ATOM   3101 HE22 GLN X 192     181.882 121.725 212.934  1.00  0.00           H
ATOM   3102  C   GLN X 192     180.981 121.608 217.277  1.00  0.00           C
ATOM   3103  O   GLN X 192     180.266 121.986 216.357  1.00  0.00           O
ATOM   3104  N   GLN X 193     180.538 120.996 218.356  1.00  0.00           N
ATOM   3105  H   GLN X 193     181.179 120.814 219.114  1.00  0.00           H
ATOM   3106  CA  GLN X 193     179.132 120.954 218.709  1.00  0.00           C
ATOM   3107  HA  GLN X 193     178.615 120.379 217.941  1.00  0.00           H
ATOM   3108  CB  GLN X 193     178.904 120.165 220.027  1.00  0.00           C
ATOM   3109  HB2 GLN X 193     179.348 119.173 219.942  1.00  0.00           H
ATOM   3110  HB3 GLN X 193     179.444 120.637 220.848  1.00  0.00           H
ATOM   3111  CG  GLN X 193     177.332 120.006 220.271  1.00  0.00           C
ATOM   3112  HG2 GLN X 193     176.942 120.942 220.672  1.00  0.00           H
ATOM   3113  HG3 GLN X 193     176.752 119.732 219.390  1.00  0.00           H
ATOM   3114  CD  GLN X 193     176.887 119.035 221.420  1.00  0.00           C
ATOM   3115  OE1 GLN X 193     177.189 119.285 222.581  1.00  0.00           O
ATOM   3116  NE2 GLN X 193     176.015 118.152 221.062  1.00  0.00           N
ATOM   3117 HE21 GLN X 193     175.795 117.475 221.779  1.00  0.00           H
ATOM   3118 HE22 GLN X 193     175.623 118.143 220.131  1.00  0.00           H
ATOM   3119  C   GLN X 193     178.477 122.361 218.669  1.00  0.00           C
ATOM   3120  O   GLN X 193     177.443 122.587 217.997  1.00  0.00           O
ATOM   3121  N   PHE X 194     179.041 123.382 219.369  1.00  0.00           N
ATOM   3122  H   PHE X 194     179.842 123.178 219.948  1.00  0.00           H
ATOM   3123  CA  PHE X 194     178.532 124.720 219.314  1.00  0.00           C
ATOM   3124  HA  PHE X 194     177.494 124.800 219.637  1.00  0.00           H
ATOM   3125  CB  PHE X 194     179.281 125.730 220.216  1.00  0.00           C
ATOM   3126  HB2 PHE X 194     179.045 125.438 221.239  1.00  0.00           H
ATOM   3127  HB3 PHE X 194     180.356 125.618 220.074  1.00  0.00           H
ATOM   3128  CG  PHE X 194     178.970 127.234 220.052  1.00  0.00           C
ATOM   3129  CD1 PHE X 194     177.651 127.721 220.188  1.00  0.00           C
ATOM   3130  HD1 PHE X 194     176.884 126.989 220.398  1.00  0.00           H
ATOM   3131  CE1 PHE X 194     177.421 129.168 220.058  1.00  0.00           C
ATOM   3132  HE1 PHE X 194     176.435 129.602 220.130  1.00  0.00           H
ATOM   3133  CZ  PHE X 194     178.517 129.960 219.680  1.00  0.00           C
ATOM   3134  HZ  PHE X 194     178.275 131.013 219.678  1.00  0.00           H
ATOM   3135  CE2 PHE X 194     179.792 129.456 219.529  1.00  0.00           C
ATOM   3136  HE2 PHE X 194     180.594 130.143 219.303  1.00  0.00           H
ATOM   3137  CD2 PHE X 194     180.035 128.098 219.812  1.00  0.00           C
ATOM   3138  HD2 PHE X 194     181.047 127.735 219.906  1.00  0.00           H
ATOM   3139  C   PHE X 194     178.508 125.282 217.901  1.00  0.00           C
ATOM   3140  O   PHE X 194     177.443 125.633 217.393  1.00  0.00           O
ATOM   3141  N   LEU X 195     179.552 125.286 217.155  1.00  0.00           N
ATOM   3142  H   LEU X 195     180.410 125.085 217.648  1.00  0.00           H
ATOM   3143  CA  LEU X 195     179.697 125.566 215.754  1.00  0.00           C
ATOM   3144  HA  LEU X 195     179.582 126.634 215.572  1.00  0.00           H
ATOM   3145  CB  LEU X 195     181.139 125.116 215.251  1.00  0.00           C
ATOM   3146  HB2 LEU X 195     181.608 124.378 215.901  1.00  0.00           H
ATOM   3147  HB3 LEU X 195     181.078 124.824 214.202  1.00  0.00           H
ATOM   3148  CG  LEU X 195     182.028 126.380 215.193  1.00  0.00           C
ATOM   3149  HG  LEU X 195     181.691 127.120 214.467  1.00  0.00           H
ATOM   3150  CD1 LEU X 195     182.220 127.111 216.516  1.00  0.00           C
ATOM   3151 HD11 LEU X 195     182.583 126.329 217.182  1.00  0.00           H
ATOM   3152 HD12 LEU X 195     181.249 127.446 216.882  1.00  0.00           H
ATOM   3153 HD13 LEU X 195     182.879 127.979 216.507  1.00  0.00           H
ATOM   3154  CD2 LEU X 195     183.311 125.898 214.564  1.00  0.00           C
ATOM   3155 HD21 LEU X 195     183.826 125.221 215.245  1.00  0.00           H
ATOM   3156 HD22 LEU X 195     183.127 125.309 213.665  1.00  0.00           H
ATOM   3157 HD23 LEU X 195     183.924 126.779 214.376  1.00  0.00           H
ATOM   3158  C   LEU X 195     178.662 124.860 214.875  1.00  0.00           C
ATOM   3159  O   LEU X 195     177.951 125.564 214.151  1.00  0.00           O
ATOM   3160  N   ASN X 196     178.370 123.589 215.017  1.00  0.00           N
ATOM   3161  H   ASN X 196     178.845 123.027 215.709  1.00  0.00           H
ATOM   3162  CA  ASN X 196     177.328 122.888 214.277  1.00  0.00           C
ATOM   3163  HA  ASN X 196     177.463 123.129 213.223  1.00  0.00           H
ATOM   3164  CB  ASN X 196     177.535 121.334 214.416  1.00  0.00           C
ATOM   3165  HB2 ASN X 196     178.443 121.082 213.868  1.00  0.00           H
ATOM   3166  HB3 ASN X 196     177.579 121.034 215.463  1.00  0.00           H
ATOM   3167  CG  ASN X 196     176.500 120.494 213.738  1.00  0.00           C
ATOM   3168  OD1 ASN X 196     176.516 120.434 212.531  1.00  0.00           O
ATOM   3169  ND2 ASN X 196     175.645 119.839 214.476  1.00  0.00           N
ATOM   3170 HD21 ASN X 196     175.673 120.031 215.467  1.00  0.00           H
ATOM   3171 HD22 ASN X 196     174.966 119.199 214.091  1.00  0.00           H
ATOM   3172  C   ASN X 196     175.896 123.431 214.648  1.00  0.00           C
ATOM   3173  O   ASN X 196     174.961 123.517 213.806  1.00  0.00           O
ATOM   3174  N   LEU X 197     175.655 123.770 215.937  1.00  0.00           N
ATOM   3175  H   LEU X 197     176.383 123.504 216.584  1.00  0.00           H
ATOM   3176  CA  LEU X 197     174.359 124.176 216.474  1.00  0.00           C
ATOM   3177  HA  LEU X 197     173.578 123.454 216.233  1.00  0.00           H
ATOM   3178  CB  LEU X 197     174.530 124.213 217.981  1.00  0.00           C
ATOM   3179  HB2 LEU X 197     174.666 123.187 218.325  1.00  0.00           H
ATOM   3180  HB3 LEU X 197     175.545 124.577 218.141  1.00  0.00           H
ATOM   3181  CG  LEU X 197     173.436 125.070 218.855  1.00  0.00           C
ATOM   3182  HG  LEU X 197     173.393 126.119 218.563  1.00  0.00           H
ATOM   3183  CD1 LEU X 197     172.114 124.376 218.584  1.00  0.00           C
ATOM   3184 HD11 LEU X 197     171.372 124.624 219.343  1.00  0.00           H
ATOM   3185 HD12 LEU X 197     172.117 123.310 218.359  1.00  0.00           H
ATOM   3186 HD13 LEU X 197     171.755 124.932 217.718  1.00  0.00           H
ATOM   3187  CD2 LEU X 197     173.738 124.901 220.284  1.00  0.00           C
ATOM   3188 HD21 LEU X 197     173.723 123.821 220.433  1.00  0.00           H
ATOM   3189 HD22 LEU X 197     174.672 125.341 220.632  1.00  0.00           H
ATOM   3190 HD23 LEU X 197     172.913 125.457 220.730  1.00  0.00           H
ATOM   3191  C   LEU X 197     174.012 125.523 215.960  1.00  0.00           C
ATOM   3192  O   LEU X 197     172.939 125.794 215.477  1.00  0.00           O
ATOM   3193  N   MET X 198     174.936 126.504 216.092  1.00  0.00           N
ATOM   3194  H   MET X 198     175.662 126.291 216.762  1.00  0.00           H
ATOM   3195  CA  MET X 198     174.941 127.832 215.356  1.00  0.00           C
ATOM   3196  HA  MET X 198     174.158 128.541 215.623  1.00  0.00           H
ATOM   3197  CB  MET X 198     176.286 128.497 215.742  1.00  0.00           C
ATOM   3198  HB2 MET X 198     176.253 128.767 216.798  1.00  0.00           H
ATOM   3199  HB3 MET X 198     177.132 127.839 215.543  1.00  0.00           H
ATOM   3200  CG  MET X 198     176.555 129.803 214.917  1.00  0.00           C
ATOM   3201  HG2 MET X 198     176.675 129.458 213.890  1.00  0.00           H
ATOM   3202  HG3 MET X 198     175.663 130.426 214.980  1.00  0.00           H
ATOM   3203  SD  MET X 198     178.092 130.727 215.425  1.00  0.00           S
ATOM   3204  CE  MET X 198     179.458 129.405 215.394  1.00  0.00           C
ATOM   3205  HE1 MET X 198     180.431 129.802 215.684  1.00  0.00           H
ATOM   3206  HE2 MET X 198     179.228 128.585 216.074  1.00  0.00           H
ATOM   3207  HE3 MET X 198     179.591 129.092 214.358  1.00  0.00           H
ATOM   3208  C   MET X 198     174.695 127.696 213.826  1.00  0.00           C
ATOM   3209  O   MET X 198     173.910 128.424 213.224  1.00  0.00           O
ATOM   3210  N   GLU X 199     175.178 126.630 213.177  1.00  0.00           N
ATOM   3211  H   GLU X 199     175.864 126.052 213.641  1.00  0.00           H
ATOM   3212  CA  GLU X 199     175.034 126.373 211.695  1.00  0.00           C
ATOM   3213  HA  GLU X 199     175.103 127.298 211.122  1.00  0.00           H
ATOM   3214  CB  GLU X 199     176.185 125.449 211.177  1.00  0.00           C
ATOM   3215  HB2 GLU X 199     177.170 125.828 211.452  1.00  0.00           H
ATOM   3216  HB3 GLU X 199     176.036 124.497 211.687  1.00  0.00           H
ATOM   3217  CG  GLU X 199     176.313 125.152 209.694  1.00  0.00           C
ATOM   3218  HG2 GLU X 199     177.102 124.426 209.496  1.00  0.00           H
ATOM   3219  HG3 GLU X 199     175.323 124.738 209.503  1.00  0.00           H
ATOM   3220  CD  GLU X 199     176.399 126.400 208.844  1.00  0.00           C
ATOM   3221  OE1 GLU X 199     175.724 126.482 207.819  1.00  0.00           O
ATOM   3222  OE2 GLU X 199     177.116 127.378 209.195  1.00  0.00           O
ATOM   3223  C   GLU X 199     173.679 125.806 211.304  1.00  0.00           C
ATOM   3224  O   GLU X 199     173.122 126.088 210.271  1.00  0.00           O
ATOM   3225  N   LYS X 200     173.099 124.960 212.155  1.00  0.00           N
ATOM   3226  H   LYS X 200     173.639 124.633 212.944  1.00  0.00           H
ATOM   3227  CA  LYS X 200     171.708 124.430 211.980  1.00  0.00           C
ATOM   3228  HA  LYS X 200     171.642 124.074 210.952  1.00  0.00           H
ATOM   3229  CB  LYS X 200     171.448 123.223 212.832  1.00  0.00           C
ATOM   3230  HB2 LYS X 200     172.040 123.286 213.745  1.00  0.00           H
ATOM   3231  HB3 LYS X 200     170.390 123.078 213.051  1.00  0.00           H
ATOM   3232  CG  LYS X 200     171.770 121.883 212.011  1.00  0.00           C
ATOM   3233  HG2 LYS X 200     171.636 121.122 212.779  1.00  0.00           H
ATOM   3234  HG3 LYS X 200     171.063 121.788 211.187  1.00  0.00           H
ATOM   3235  CD  LYS X 200     173.215 121.755 211.548  1.00  0.00           C
ATOM   3236  HD2 LYS X 200     173.534 122.575 210.906  1.00  0.00           H
ATOM   3237  HD3 LYS X 200     173.883 121.764 212.409  1.00  0.00           H
ATOM   3238  CE  LYS X 200     173.419 120.336 210.917  1.00  0.00           C
ATOM   3239  HE2 LYS X 200     173.141 119.597 211.669  1.00  0.00           H
ATOM   3240  HE3 LYS X 200     172.705 120.130 210.120  1.00  0.00           H
ATOM   3241  NZ  LYS X 200     174.771 120.083 210.305  1.00  0.00           N
ATOM   3242  HZ1 LYS X 200     174.722 119.160 209.898  1.00  0.00           H
ATOM   3243  HZ2 LYS X 200     175.519 120.099 210.984  1.00  0.00           H
ATOM   3244  HZ3 LYS X 200     175.009 120.831 209.668  1.00  0.00           H
ATOM   3245  C   LYS X 200     170.697 125.513 212.049  1.00  0.00           C
ATOM   3246  O   LYS X 200     169.581 125.419 211.555  1.00  0.00           O
ATOM   3247  N   LEU X 201     170.991 126.605 212.738  1.00  0.00           N
ATOM   3248  H   LEU X 201     171.903 126.606 213.170  1.00  0.00           H
ATOM   3249  CA  LEU X 201     170.178 127.822 212.815  1.00  0.00           C
ATOM   3250  HA  LEU X 201     169.109 127.608 212.806  1.00  0.00           H
ATOM   3251  CB  LEU X 201     170.408 128.661 214.131  1.00  0.00           C
ATOM   3252  HB2 LEU X 201     171.491 128.784 214.130  1.00  0.00           H
ATOM   3253  HB3 LEU X 201     169.950 129.649 214.100  1.00  0.00           H
ATOM   3254  CG  LEU X 201     169.945 127.833 215.298  1.00  0.00           C
ATOM   3255  HG  LEU X 201     170.249 126.798 215.142  1.00  0.00           H
ATOM   3256  CD1 LEU X 201     170.383 128.493 216.633  1.00  0.00           C
ATOM   3257 HD11 LEU X 201     170.011 127.912 217.477  1.00  0.00           H
ATOM   3258 HD12 LEU X 201     170.088 129.540 216.704  1.00  0.00           H
ATOM   3259 HD13 LEU X 201     171.470 128.560 216.647  1.00  0.00           H
ATOM   3260  CD2 LEU X 201     168.460 127.768 215.449  1.00  0.00           C
ATOM   3261 HD21 LEU X 201     168.040 127.379 214.521  1.00  0.00           H
ATOM   3262 HD22 LEU X 201     168.178 126.951 216.113  1.00  0.00           H
ATOM   3263 HD23 LEU X 201     168.086 128.730 215.798  1.00  0.00           H
ATOM   3264  C   LEU X 201     170.416 128.640 211.577  1.00  0.00           C
ATOM   3265  O   LEU X 201     169.445 128.984 210.894  1.00  0.00           O
ATOM   3266  N   ASN X 202     171.659 128.770 211.224  1.00  0.00           N
ATOM   3267  H   ASN X 202     172.384 128.449 211.850  1.00  0.00           H
ATOM   3268  CA  ASN X 202     172.117 129.605 210.117  1.00  0.00           C
ATOM   3269  HA  ASN X 202     171.803 130.633 210.302  1.00  0.00           H
ATOM   3270  CB  ASN X 202     173.684 129.441 210.084  1.00  0.00           C
ATOM   3271  HB2 ASN X 202     174.136 129.667 211.050  1.00  0.00           H
ATOM   3272  HB3 ASN X 202     173.984 128.448 209.752  1.00  0.00           H
ATOM   3273  CG  ASN X 202     174.430 130.303 209.116  1.00  0.00           C
ATOM   3274  OD1 ASN X 202     173.984 131.274 208.602  1.00  0.00           O
ATOM   3275  ND2 ASN X 202     175.597 129.922 208.695  1.00  0.00           N
ATOM   3276 HD21 ASN X 202     175.926 128.980 208.853  1.00  0.00           H
ATOM   3277 HD22 ASN X 202     176.022 130.540 208.019  1.00  0.00           H
ATOM   3278  C   ASN X 202     171.468 129.150 208.811  1.00  0.00           C
ATOM   3279  O   ASN X 202     170.989 129.962 207.994  1.00  0.00           O
ATOM   3280  N   GLU X 203     171.478 127.832 208.604  1.00  0.00           N
ATOM   3281  H   GLU X 203     171.886 127.265 209.335  1.00  0.00           H
ATOM   3282  CA  GLU X 203     170.854 127.145 207.451  1.00  0.00           C
ATOM   3283  HA  GLU X 203     171.329 127.514 206.542  1.00  0.00           H
ATOM   3284  CB  GLU X 203     171.198 125.686 207.560  1.00  0.00           C
ATOM   3285  HB2 GLU X 203     172.267 125.540 207.402  1.00  0.00           H
ATOM   3286  HB3 GLU X 203     170.811 125.352 208.523  1.00  0.00           H
ATOM   3287  CG  GLU X 203     170.482 124.770 206.464  1.00  0.00           C
ATOM   3288  HG2 GLU X 203     170.869 123.764 206.625  1.00  0.00           H
ATOM   3289  HG3 GLU X 203     169.404 124.915 206.534  1.00  0.00           H
ATOM   3290  CD  GLU X 203     170.905 125.096 205.012  1.00  0.00           C
ATOM   3291  OE1 GLU X 203     170.399 124.423 204.081  1.00  0.00           O
ATOM   3292  OE2 GLU X 203     171.755 125.983 204.705  1.00  0.00           O
ATOM   3293  C   GLU X 203     169.313 127.351 207.446  1.00  0.00           C
ATOM   3294  O   GLU X 203     168.770 127.615 206.340  1.00  0.00           O
ATOM   3295  N   ASN X 204     168.598 127.251 208.650  1.00  0.00           N
ATOM   3296  H   ASN X 204     169.120 127.154 209.509  1.00  0.00           H
ATOM   3297  CA  ASN X 204     167.138 127.466 208.686  1.00  0.00           C
ATOM   3298  HA  ASN X 204     166.649 126.901 207.892  1.00  0.00           H
ATOM   3299  CB  ASN X 204     166.583 127.002 210.128  1.00  0.00           C
ATOM   3300  HB2 ASN X 204     167.160 127.488 210.914  1.00  0.00           H
ATOM   3301  HB3 ASN X 204     165.602 127.420 210.355  1.00  0.00           H
ATOM   3302  CG  ASN X 204     166.317 125.560 210.386  1.00  0.00           C
ATOM   3303  OD1 ASN X 204     166.546 124.717 209.549  1.00  0.00           O
ATOM   3304  ND2 ASN X 204     165.948 125.159 211.569  1.00  0.00           N
ATOM   3305 HD21 ASN X 204     165.681 125.778 212.322  1.00  0.00           H
ATOM   3306 HD22 ASN X 204     165.964 124.191 211.854  1.00  0.00           H
ATOM   3307  C   ASN X 204     166.834 128.998 208.328  1.00  0.00           C
ATOM   3308  O   ASN X 204     165.790 129.280 207.678  1.00  0.00           O
ATOM   3309  N   ILE X 205     167.690 129.902 208.795  1.00  0.00           N
ATOM   3310  H   ILE X 205     168.442 129.530 209.356  1.00  0.00           H
ATOM   3311  CA  ILE X 205     167.572 131.311 208.546  1.00  0.00           C
ATOM   3312  HA  ILE X 205     166.579 131.739 208.680  1.00  0.00           H
ATOM   3313  CB  ILE X 205     168.422 132.078 209.546  1.00  0.00           C
ATOM   3314  HB  ILE X 205     169.500 131.930 209.484  1.00  0.00           H
ATOM   3315  CG2 ILE X 205     168.141 133.619 209.323  1.00  0.00           C
ATOM   3316 HG21 ILE X 205     167.139 134.002 209.515  1.00  0.00           H
ATOM   3317 HG22 ILE X 205     168.469 133.846 208.308  1.00  0.00           H
ATOM   3318 HG23 ILE X 205     168.783 134.160 210.018  1.00  0.00           H
ATOM   3319  CG1 ILE X 205     168.020 131.730 210.983  1.00  0.00           C
ATOM   3320 HG12 ILE X 205     167.186 132.365 211.282  1.00  0.00           H
ATOM   3321 HG13 ILE X 205     167.735 130.681 211.063  1.00  0.00           H
ATOM   3322  CD1 ILE X 205     169.246 131.969 211.983  1.00  0.00           C
ATOM   3323 HD11 ILE X 205     169.103 131.444 212.927  1.00  0.00           H
ATOM   3324 HD12 ILE X 205     169.364 133.031 212.199  1.00  0.00           H
ATOM   3325 HD13 ILE X 205     170.192 131.696 211.515  1.00  0.00           H
ATOM   3326  C   ILE X 205     167.921 131.549 207.106  1.00  0.00           C
ATOM   3327  O   ILE X 205     167.139 132.227 206.467  1.00  0.00           O
ATOM   3328  N   ARG X 206     168.869 130.866 206.428  1.00  0.00           N
ATOM   3329  H   ARG X 206     169.393 130.199 206.977  1.00  0.00           H
ATOM   3330  CA  ARG X 206     169.027 131.011 204.951  1.00  0.00           C
ATOM   3331  HA  ARG X 206     169.132 132.070 204.714  1.00  0.00           H
ATOM   3332  CB  ARG X 206     170.332 130.313 204.366  1.00  0.00           C
ATOM   3333  HB2 ARG X 206     170.523 129.334 204.805  1.00  0.00           H
ATOM   3334  HB3 ARG X 206     170.249 130.326 203.279  1.00  0.00           H
ATOM   3335  CG  ARG X 206     171.692 130.992 204.525  1.00  0.00           C
ATOM   3336  HG2 ARG X 206     171.690 131.905 203.930  1.00  0.00           H
ATOM   3337  HG3 ARG X 206     171.897 131.240 205.567  1.00  0.00           H
ATOM   3338  CD  ARG X 206     172.734 130.084 203.823  1.00  0.00           C
ATOM   3339  HD2 ARG X 206     172.475 129.929 202.776  1.00  0.00           H
ATOM   3340  HD3 ARG X 206     173.684 130.616 203.780  1.00  0.00           H
ATOM   3341  NE  ARG X 206     172.931 128.773 204.544  1.00  0.00           N
ATOM   3342  HE  ARG X 206     172.259 128.022 204.471  1.00  0.00           H
ATOM   3343  CZ  ARG X 206     173.896 128.474 205.316  1.00  0.00           C
ATOM   3344  NH1 ARG X 206     175.033 129.158 205.409  1.00  0.00           N
ATOM   3345 HH11 ARG X 206     175.172 130.022 204.905  1.00  0.00           H
ATOM   3346 HH12 ARG X 206     175.808 128.706 205.874  1.00  0.00           H
ATOM   3347  NH2 ARG X 206     173.892 127.292 205.975  1.00  0.00           N
ATOM   3348 HH21 ARG X 206     173.096 126.674 205.908  1.00  0.00           H
ATOM   3349 HH22 ARG X 206     174.684 127.067 206.560  1.00  0.00           H
ATOM   3350  C   ARG X 206     167.839 130.442 204.176  1.00  0.00           C
ATOM   3351  O   ARG X 206     167.273 131.228 203.431  1.00  0.00           O
ATOM   3352  N   ILE X 207     167.410 129.186 204.417  1.00  0.00           N
ATOM   3353  H   ILE X 207     168.030 128.598 204.955  1.00  0.00           H
ATOM   3354  CA  ILE X 207     166.274 128.686 203.687  1.00  0.00           C
ATOM   3355  HA  ILE X 207     166.554 128.474 202.655  1.00  0.00           H
ATOM   3356  CB  ILE X 207     165.869 127.316 204.324  1.00  0.00           C
ATOM   3357  HB  ILE X 207     165.707 127.401 205.399  1.00  0.00           H
ATOM   3358  CG2 ILE X 207     164.573 126.761 203.599  1.00  0.00           C
ATOM   3359 HG21 ILE X 207     164.640 127.049 202.549  1.00  0.00           H
ATOM   3360 HG22 ILE X 207     163.670 127.268 203.939  1.00  0.00           H
ATOM   3361 HG23 ILE X 207     164.430 125.702 203.815  1.00  0.00           H
ATOM   3362  CG1 ILE X 207     166.852 126.144 204.183  1.00  0.00           C
ATOM   3363 HG12 ILE X 207     166.866 125.753 203.166  1.00  0.00           H
ATOM   3364 HG13 ILE X 207     167.886 126.489 204.213  1.00  0.00           H
ATOM   3365  CD1 ILE X 207     166.642 125.038 205.319  1.00  0.00           C
ATOM   3366 HD11 ILE X 207     166.757 125.435 206.327  1.00  0.00           H
ATOM   3367 HD12 ILE X 207     167.420 124.306 205.105  1.00  0.00           H
ATOM   3368 HD13 ILE X 207     165.686 124.522 205.230  1.00  0.00           H
ATOM   3369  C   ILE X 207     164.976 129.623 203.711  1.00  0.00           C
ATOM   3370  O   ILE X 207     164.496 129.998 202.667  1.00  0.00           O
ATOM   3371  N   VAL X 208     164.651 130.208 204.890  1.00  0.00           N
ATOM   3372  H   VAL X 208     165.100 129.979 205.765  1.00  0.00           H
ATOM   3373  CA  VAL X 208     163.445 131.004 204.898  1.00  0.00           C
ATOM   3374  HA  VAL X 208     162.819 130.561 204.123  1.00  0.00           H
ATOM   3375  CB  VAL X 208     162.586 130.745 206.170  1.00  0.00           C
ATOM   3376  HB  VAL X 208     161.582 131.114 205.960  1.00  0.00           H
ATOM   3377  CG1 VAL X 208     162.389 129.245 206.442  1.00  0.00           C
ATOM   3378 HG11 VAL X 208     162.226 128.720 205.501  1.00  0.00           H
ATOM   3379 HG12 VAL X 208     163.282 128.911 206.971  1.00  0.00           H
ATOM   3380 HG13 VAL X 208     161.549 129.110 207.123  1.00  0.00           H
ATOM   3381  CG2 VAL X 208     162.957 131.546 207.455  1.00  0.00           C
ATOM   3382 HG21 VAL X 208     162.441 131.226 208.360  1.00  0.00           H
ATOM   3383 HG22 VAL X 208     162.593 132.547 207.225  1.00  0.00           H
ATOM   3384 HG23 VAL X 208     164.006 131.605 207.748  1.00  0.00           H
ATOM   3385  C   VAL X 208     163.457 132.515 204.440  1.00  0.00           C
ATOM   3386  O   VAL X 208     162.513 133.273 204.484  1.00  0.00           O
ATOM   3387  N   SER X 209     164.669 132.971 204.063  1.00  0.00           N
ATOM   3388  H   SER X 209     165.412 132.332 204.307  1.00  0.00           H
ATOM   3389  CA  SER X 209     165.089 134.278 203.489  1.00  0.00           C
ATOM   3390  HA  SER X 209     164.176 134.870 203.425  1.00  0.00           H
ATOM   3391  CB  SER X 209     166.125 135.031 204.365  1.00  0.00           C
ATOM   3392  HB2 SER X 209     166.271 135.994 203.876  1.00  0.00           H
ATOM   3393  HB3 SER X 209     165.731 135.225 205.363  1.00  0.00           H
ATOM   3394  OG  SER X 209     167.318 134.244 204.473  1.00  0.00           O
ATOM   3395  HG  SER X 209     167.245 133.680 205.247  1.00  0.00           H
ATOM   3396  C   SER X 209     165.608 134.216 202.054  1.00  0.00           C
ATOM   3397  O   SER X 209     165.850 135.273 201.513  1.00  0.00           O
ATOM   3398  N   THR X 210     165.627 133.078 201.349  1.00  0.00           N
ATOM   3399  H   THR X 210     165.311 132.223 201.782  1.00  0.00           H
ATOM   3400  CA  THR X 210     165.879 132.958 199.874  1.00  0.00           C
ATOM   3401  HA  THR X 210     166.763 133.558 199.660  1.00  0.00           H
ATOM   3402  CB  THR X 210     166.331 131.541 199.549  1.00  0.00           C
ATOM   3403  HB  THR X 210     165.725 130.874 200.162  1.00  0.00           H
ATOM   3404  CG2 THR X 210     166.311 131.136 198.071  1.00  0.00           C
ATOM   3405 HG21 THR X 210     165.310 130.774 197.835  1.00  0.00           H
ATOM   3406 HG22 THR X 210     167.005 130.317 197.885  1.00  0.00           H
ATOM   3407 HG23 THR X 210     166.540 132.036 197.500  1.00  0.00           H
ATOM   3408  OG1 THR X 210     167.690 131.272 199.924  1.00  0.00           O
ATOM   3409  HG1 THR X 210     167.690 131.399 200.875  1.00  0.00           H
ATOM   3410  C   THR X 210     164.607 133.434 199.034  1.00  0.00           C
ATOM   3411  O   THR X 210     163.508 132.915 199.273  1.00  0.00           O
ATOM   3412  N   PRO X 211     164.834 134.427 198.136  1.00  0.00           N
ATOM   3413  CD  PRO X 211     166.132 135.075 197.728  1.00  0.00           C
ATOM   3414  HD2 PRO X 211     166.574 134.462 196.943  1.00  0.00           H
ATOM   3415  HD3 PRO X 211     166.806 135.318 198.550  1.00  0.00           H
ATOM   3416  CG  PRO X 211     165.792 136.404 197.053  1.00  0.00           C
ATOM   3417  HG2 PRO X 211     166.400 136.723 196.206  1.00  0.00           H
ATOM   3418  HG3 PRO X 211     165.741 137.136 197.859  1.00  0.00           H
ATOM   3419  CB  PRO X 211     164.430 136.217 196.543  1.00  0.00           C
ATOM   3420  HB2 PRO X 211     164.607 135.791 195.555  1.00  0.00           H
ATOM   3421  HB3 PRO X 211     163.866 137.146 196.460  1.00  0.00           H
ATOM   3422  CA  PRO X 211     163.714 135.113 197.348  1.00  0.00           C
ATOM   3423  HA  PRO X 211     163.101 135.477 198.172  1.00  0.00           H
ATOM   3424  C   PRO X 211     162.831 134.168 196.479  1.00  0.00           C
ATOM   3425  O   PRO X 211     161.636 134.428 196.369  1.00  0.00           O
ATOM   3426  N   TRP X 212     163.364 133.136 195.855  1.00  0.00           N
ATOM   3427  H   TRP X 212     164.361 132.977 195.823  1.00  0.00           H
ATOM   3428  CA  TRP X 212     162.433 132.198 195.169  1.00  0.00           C
ATOM   3429  HA  TRP X 212     161.776 132.805 194.547  1.00  0.00           H
ATOM   3430  CB  TRP X 212     163.130 131.158 194.282  1.00  0.00           C
ATOM   3431  HB2 TRP X 212     162.437 130.900 193.481  1.00  0.00           H
ATOM   3432  HB3 TRP X 212     163.942 131.709 193.807  1.00  0.00           H
ATOM   3433  CG  TRP X 212     163.647 129.862 194.854  1.00  0.00           C
ATOM   3434  CD1 TRP X 212     164.940 129.700 195.017  1.00  0.00           C
ATOM   3435  HD1 TRP X 212     165.684 130.463 194.841  1.00  0.00           H
ATOM   3436  NE1 TRP X 212     165.258 128.483 195.544  1.00  0.00           N
ATOM   3437  HE1 TRP X 212     166.185 128.160 195.780  1.00  0.00           H
ATOM   3438  CE2 TRP X 212     164.131 127.639 195.529  1.00  0.00           C
ATOM   3439  CZ2 TRP X 212     163.882 126.274 195.852  1.00  0.00           C
ATOM   3440  HZ2 TRP X 212     164.588 125.611 196.331  1.00  0.00           H
ATOM   3441  CH2 TRP X 212     162.502 125.819 195.770  1.00  0.00           C
ATOM   3442  HH2 TRP X 212     162.257 124.772 195.875  1.00  0.00           H
ATOM   3443  CZ3 TRP X 212     161.471 126.688 195.404  1.00  0.00           C
ATOM   3444  HZ3 TRP X 212     160.438 126.406 195.258  1.00  0.00           H
ATOM   3445  CE3 TRP X 212     161.763 128.021 195.067  1.00  0.00           C
ATOM   3446  HE3 TRP X 212     161.064 128.718 194.628  1.00  0.00           H
ATOM   3447  CD2 TRP X 212     163.078 128.508 195.104  1.00  0.00           C
ATOM   3448  C   TRP X 212     161.499 131.478 196.206  1.00  0.00           C
ATOM   3449  O   TRP X 212     160.333 131.314 195.900  1.00  0.00           O
ATOM   3450  N   ILE X 213     162.056 131.064 197.345  1.00  0.00           N
ATOM   3451  H   ILE X 213     163.047 131.134 197.524  1.00  0.00           H
ATOM   3452  CA  ILE X 213     161.185 130.376 198.346  1.00  0.00           C
ATOM   3453  HA  ILE X 213     160.572 129.629 197.841  1.00  0.00           H
ATOM   3454  CB  ILE X 213     161.979 129.618 199.439  1.00  0.00           C
ATOM   3455  HB  ILE X 213     162.631 130.229 200.063  1.00  0.00           H
ATOM   3456  CG2 ILE X 213     160.997 129.011 200.494  1.00  0.00           C
ATOM   3457 HG21 ILE X 213     160.973 129.794 201.251  1.00  0.00           H
ATOM   3458 HG22 ILE X 213     161.354 128.070 200.912  1.00  0.00           H
ATOM   3459 HG23 ILE X 213     160.028 128.835 200.027  1.00  0.00           H
ATOM   3460  CG1 ILE X 213     162.710 128.412 198.749  1.00  0.00           C
ATOM   3461 HG12 ILE X 213     162.040 127.736 198.218  1.00  0.00           H
ATOM   3462 HG13 ILE X 213     163.346 128.759 197.934  1.00  0.00           H
ATOM   3463  CD1 ILE X 213     163.695 127.734 199.661  1.00  0.00           C
ATOM   3464 HD11 ILE X 213     164.594 128.328 199.830  1.00  0.00           H
ATOM   3465 HD12 ILE X 213     164.123 126.950 199.037  1.00  0.00           H
ATOM   3466 HD13 ILE X 213     163.356 127.336 200.617  1.00  0.00           H
ATOM   3467  C   ILE X 213     160.182 131.403 198.916  1.00  0.00           C
ATOM   3468  O   ILE X 213     159.003 131.117 199.199  1.00  0.00           O
ATOM   3469  N   GLN X 214     160.598 132.686 199.176  1.00  0.00           N
ATOM   3470  H   GLN X 214     161.595 132.799 199.059  1.00  0.00           H
ATOM   3471  CA  GLN X 214     159.647 133.737 199.660  1.00  0.00           C
ATOM   3472  HA  GLN X 214     159.133 133.431 200.572  1.00  0.00           H
ATOM   3473  CB  GLN X 214     160.414 135.000 200.085  1.00  0.00           C
ATOM   3474  HB2 GLN X 214     161.289 135.111 199.446  1.00  0.00           H
ATOM   3475  HB3 GLN X 214     159.853 135.929 199.983  1.00  0.00           H
ATOM   3476  CG  GLN X 214     161.106 135.071 201.467  1.00  0.00           C
ATOM   3477  HG2 GLN X 214     161.673 134.155 201.629  1.00  0.00           H
ATOM   3478  HG3 GLN X 214     161.739 135.956 201.540  1.00  0.00           H
ATOM   3479  CD  GLN X 214     160.055 135.198 202.583  1.00  0.00           C
ATOM   3480  OE1 GLN X 214     158.906 135.497 202.359  1.00  0.00           O
ATOM   3481  NE2 GLN X 214     160.273 134.869 203.806  1.00  0.00           N
ATOM   3482 HE21 GLN X 214     159.711 135.246 204.555  1.00  0.00           H
ATOM   3483 HE22 GLN X 214     161.155 134.456 204.074  1.00  0.00           H
ATOM   3484  C   GLN X 214     158.642 134.209 198.633  1.00  0.00           C
ATOM   3485  O   GLN X 214     157.560 134.474 199.090  1.00  0.00           O
ATOM   3486  N   ILE X 215     158.918 134.192 197.294  1.00  0.00           N
ATOM   3487  H   ILE X 215     159.857 134.188 196.923  1.00  0.00           H
ATOM   3488  CA  ILE X 215     157.854 134.373 196.273  1.00  0.00           C
ATOM   3489  HA  ILE X 215     157.345 135.293 196.556  1.00  0.00           H
ATOM   3490  CB  ILE X 215     158.465 134.437 194.801  1.00  0.00           C
ATOM   3491  HB  ILE X 215     159.330 133.774 194.785  1.00  0.00           H
ATOM   3492  CG2 ILE X 215     157.482 134.079 193.639  1.00  0.00           C
ATOM   3493 HG21 ILE X 215     156.553 134.645 193.713  1.00  0.00           H
ATOM   3494 HG22 ILE X 215     157.212 133.026 193.709  1.00  0.00           H
ATOM   3495 HG23 ILE X 215     157.998 134.245 192.693  1.00  0.00           H
ATOM   3496  CG1 ILE X 215     159.050 135.885 194.561  1.00  0.00           C
ATOM   3497 HG12 ILE X 215     158.235 136.609 194.550  1.00  0.00           H
ATOM   3498 HG13 ILE X 215     159.563 136.029 195.512  1.00  0.00           H
ATOM   3499  CD1 ILE X 215     159.974 135.973 193.327  1.00  0.00           C
ATOM   3500 HD11 ILE X 215     159.430 135.764 192.406  1.00  0.00           H
ATOM   3501 HD12 ILE X 215     160.738 135.197 193.382  1.00  0.00           H
ATOM   3502 HD13 ILE X 215     160.634 136.828 193.476  1.00  0.00           H
ATOM   3503  C   ILE X 215     156.819 133.247 196.366  1.00  0.00           C
ATOM   3504  O   ILE X 215     155.611 133.486 196.320  1.00  0.00           O
ATOM   3505  N   CYS X 216     157.300 132.099 196.618  1.00  0.00           N
ATOM   3506  H   CYS X 216     158.305 132.050 196.533  1.00  0.00           H
ATOM   3507  CA  CYS X 216     156.402 130.887 196.655  1.00  0.00           C
ATOM   3508  HA  CYS X 216     155.885 130.819 195.697  1.00  0.00           H
ATOM   3509  CB  CYS X 216     157.342 129.666 196.732  1.00  0.00           C
ATOM   3510  HB2 CYS X 216     158.064 129.830 197.532  1.00  0.00           H
ATOM   3511  HB3 CYS X 216     156.804 128.756 196.997  1.00  0.00           H
ATOM   3512  SG  CYS X 216     158.135 129.357 195.137  1.00  0.00           S
ATOM   3513  HG  CYS X 216     159.124 130.255 195.130  1.00  0.00           H
ATOM   3514  C   CYS X 216     155.391 130.851 197.771  1.00  0.00           C
ATOM   3515  O   CYS X 216     154.375 130.124 197.687  1.00  0.00           O
ATOM   3516  N   ASN X 217     155.680 131.560 198.901  1.00  0.00           N
ATOM   3517  H   ASN X 217     156.548 132.072 198.964  1.00  0.00           H
ATOM   3518  CA  ASN X 217     154.773 131.547 200.100  1.00  0.00           C
ATOM   3519  HA  ASN X 217     154.376 130.541 200.228  1.00  0.00           H
ATOM   3520  CB  ASN X 217     155.776 132.039 201.254  1.00  0.00           C
ATOM   3521  HB2 ASN X 217     156.710 132.496 200.929  1.00  0.00           H
ATOM   3522  HB3 ASN X 217     155.288 132.608 202.046  1.00  0.00           H
ATOM   3523  CG  ASN X 217     156.288 130.776 201.918  1.00  0.00           C
ATOM   3524  OD1 ASN X 217     155.861 130.360 202.930  1.00  0.00           O
ATOM   3525  ND2 ASN X 217     157.337 130.129 201.451  1.00  0.00           N
ATOM   3526 HD21 ASN X 217     157.804 130.364 200.587  1.00  0.00           H
ATOM   3527 HD22 ASN X 217     157.741 129.470 202.102  1.00  0.00           H
ATOM   3528  C   ASN X 217     153.547 132.447 199.881  1.00  0.00           C
ATOM   3529  O   ASN X 217     152.596 132.430 200.660  1.00  0.00           O
ATOM   3530  N   ASN X 218     153.502 133.236 198.772  1.00  0.00           N
ATOM   3531  H   ASN X 218     154.307 133.166 198.166  1.00  0.00           H
ATOM   3532  CA  ASN X 218     152.389 134.090 198.346  1.00  0.00           C
ATOM   3533  HA  ASN X 218     152.002 134.673 199.181  1.00  0.00           H
ATOM   3534  CB  ASN X 218     152.969 135.143 197.349  1.00  0.00           C
ATOM   3535  HB2 ASN X 218     153.403 134.798 196.410  1.00  0.00           H
ATOM   3536  HB3 ASN X 218     152.144 135.811 197.101  1.00  0.00           H
ATOM   3537  CG  ASN X 218     153.904 136.146 197.970  1.00  0.00           C
ATOM   3538  OD1 ASN X 218     153.576 136.837 198.967  1.00  0.00           O
ATOM   3539  ND2 ASN X 218     155.102 136.114 197.500  1.00  0.00           N
ATOM   3540 HD21 ASN X 218     155.364 135.344 196.902  1.00  0.00           H
ATOM   3541 HD22 ASN X 218     155.752 136.817 197.821  1.00  0.00           H
ATOM   3542  C   ASN X 218     151.191 133.286 197.810  1.00  0.00           C
ATOM   3543  O   ASN X 218     150.156 133.887 197.381  1.00  0.00           O
ATOM   3544  N   PHE X 219     151.419 131.959 197.709  1.00  0.00           N
ATOM   3545  H   PHE X 219     152.238 131.568 198.152  1.00  0.00           H
ATOM   3546  CA  PHE X 219     150.447 130.996 197.207  1.00  0.00           C
ATOM   3547  HA  PHE X 219     149.477 131.460 197.027  1.00  0.00           H
ATOM   3548  CB  PHE X 219     150.890 130.376 195.878  1.00  0.00           C
ATOM   3549  HB2 PHE X 219     151.668 129.623 196.007  1.00  0.00           H
ATOM   3550  HB3 PHE X 219     150.075 129.822 195.414  1.00  0.00           H
ATOM   3551  CG  PHE X 219     151.474 131.424 194.888  1.00  0.00           C
ATOM   3552  CD1 PHE X 219     152.829 131.819 195.015  1.00  0.00           C
ATOM   3553  HD1 PHE X 219     153.408 131.368 195.808  1.00  0.00           H
ATOM   3554  CE1 PHE X 219     153.422 132.712 194.152  1.00  0.00           C
ATOM   3555  HE1 PHE X 219     154.484 132.884 194.252  1.00  0.00           H
ATOM   3556  CZ  PHE X 219     152.626 133.282 193.108  1.00  0.00           C
ATOM   3557  HZ  PHE X 219     153.165 133.828 192.348  1.00  0.00           H
ATOM   3558  CE2 PHE X 219     151.380 132.756 192.816  1.00  0.00           C
ATOM   3559  HE2 PHE X 219     150.780 133.075 191.977  1.00  0.00           H
ATOM   3560  CD2 PHE X 219     150.739 131.905 193.757  1.00  0.00           C
ATOM   3561  HD2 PHE X 219     149.784 131.450 193.540  1.00  0.00           H
ATOM   3562  C   PHE X 219     150.288 129.865 198.282  1.00  0.00           C
ATOM   3563  O   PHE X 219     151.341 129.446 198.779  1.00  0.00           O
ATOM   3564  N   PRO X 220     149.125 129.327 198.666  1.00  0.00           N
ATOM   3565  CD  PRO X 220     147.863 129.785 198.232  1.00  0.00           C
ATOM   3566  HD2 PRO X 220     147.430 129.222 197.404  1.00  0.00           H
ATOM   3567  HD3 PRO X 220     147.868 130.829 197.921  1.00  0.00           H
ATOM   3568  CG  PRO X 220     146.862 129.527 199.383  1.00  0.00           C
ATOM   3569  HG2 PRO X 220     145.813 129.401 199.118  1.00  0.00           H
ATOM   3570  HG3 PRO X 220     146.946 130.264 200.181  1.00  0.00           H
ATOM   3571  CB  PRO X 220     147.407 128.314 199.988  1.00  0.00           C
ATOM   3572  HB2 PRO X 220     147.079 127.411 199.472  1.00  0.00           H
ATOM   3573  HB3 PRO X 220     147.219 128.327 201.061  1.00  0.00           H
ATOM   3574  CA  PRO X 220     148.991 128.375 199.777  1.00  0.00           C
ATOM   3575  HA  PRO X 220     149.426 128.915 200.618  1.00  0.00           H
ATOM   3576  C   PRO X 220     149.551 126.951 199.748  1.00  0.00           C
ATOM   3577  O   PRO X 220     149.582 126.362 200.823  1.00  0.00           O
ATOM   3578  N   THR X 221     149.950 126.495 198.587  1.00  0.00           N
ATOM   3579  H   THR X 221     149.755 127.051 197.766  1.00  0.00           H
ATOM   3580  CA  THR X 221     150.308 125.086 198.532  1.00  0.00           C
ATOM   3581  HA  THR X 221     150.580 124.743 199.531  1.00  0.00           H
ATOM   3582  CB  THR X 221     149.130 124.259 197.981  1.00  0.00           C
ATOM   3583  HB  THR X 221     149.460 123.233 197.816  1.00  0.00           H
ATOM   3584  CG2 THR X 221     148.049 124.146 199.131  1.00  0.00           C
ATOM   3585 HG21 THR X 221     147.306 123.362 198.982  1.00  0.00           H
ATOM   3586 HG22 THR X 221     147.633 125.078 199.514  1.00  0.00           H
ATOM   3587 HG23 THR X 221     148.577 123.774 200.010  1.00  0.00           H
ATOM   3588  OG1 THR X 221     148.479 124.767 196.836  1.00  0.00           O
ATOM   3589  HG1 THR X 221     147.677 124.243 196.768  1.00  0.00           H
ATOM   3590  C   THR X 221     151.585 124.738 197.682  1.00  0.00           C
ATOM   3591  O   THR X 221     152.126 123.714 197.997  1.00  0.00           O
ATOM   3592  N   ILE X 222     151.942 125.520 196.652  1.00  0.00           N
ATOM   3593  H   ILE X 222     151.294 126.280 196.501  1.00  0.00           H
ATOM   3594  CA  ILE X 222     152.949 125.159 195.631  1.00  0.00           C
ATOM   3595  HA  ILE X 222     152.562 124.250 195.170  1.00  0.00           H
ATOM   3596  CB  ILE X 222     153.106 126.219 194.488  1.00  0.00           C
ATOM   3597  HB  ILE X 222     153.754 125.800 193.719  1.00  0.00           H
ATOM   3598  CG2 ILE X 222     151.703 126.552 193.926  1.00  0.00           C
ATOM   3599 HG21 ILE X 222     151.136 125.624 193.850  1.00  0.00           H
ATOM   3600 HG22 ILE X 222     151.748 127.105 192.988  1.00  0.00           H
ATOM   3601 HG23 ILE X 222     151.135 127.118 194.664  1.00  0.00           H
ATOM   3602  CG1 ILE X 222     153.886 127.463 195.048  1.00  0.00           C
ATOM   3603 HG12 ILE X 222     153.249 127.973 195.771  1.00  0.00           H
ATOM   3604 HG13 ILE X 222     154.848 127.233 195.505  1.00  0.00           H
ATOM   3605  CD1 ILE X 222     154.364 128.435 193.949  1.00  0.00           C
ATOM   3606 HD11 ILE X 222     154.981 129.226 194.374  1.00  0.00           H
ATOM   3607 HD12 ILE X 222     153.526 128.914 193.442  1.00  0.00           H
ATOM   3608 HD13 ILE X 222     154.952 127.912 193.195  1.00  0.00           H
ATOM   3609  C   ILE X 222     154.401 124.926 196.171  1.00  0.00           C
ATOM   3610  O   ILE X 222     155.090 124.139 195.515  1.00  0.00           O
ATOM   3611  N   ILE X 223     154.721 125.326 197.339  1.00  0.00           N
ATOM   3612  H   ILE X 223     154.096 125.982 197.786  1.00  0.00           H
ATOM   3613  CA  ILE X 223     155.873 124.806 198.033  1.00  0.00           C
ATOM   3614  HA  ILE X 223     156.720 124.943 197.360  1.00  0.00           H
ATOM   3615  CB  ILE X 223     156.343 125.633 199.351  1.00  0.00           C
ATOM   3616  HB  ILE X 223     157.191 125.099 199.780  1.00  0.00           H
ATOM   3617  CG2 ILE X 223     156.903 127.046 199.047  1.00  0.00           C
ATOM   3618 HG21 ILE X 223     157.224 127.644 199.900  1.00  0.00           H
ATOM   3619 HG22 ILE X 223     156.065 127.640 198.683  1.00  0.00           H
ATOM   3620 HG23 ILE X 223     157.654 127.096 198.259  1.00  0.00           H
ATOM   3621  CG1 ILE X 223     155.298 125.578 200.490  1.00  0.00           C
ATOM   3622 HG12 ILE X 223     154.545 126.276 200.124  1.00  0.00           H
ATOM   3623 HG13 ILE X 223     154.924 124.568 200.657  1.00  0.00           H
ATOM   3624  CD1 ILE X 223     155.944 126.160 201.813  1.00  0.00           C
ATOM   3625 HD11 ILE X 223     155.241 126.111 202.645  1.00  0.00           H
ATOM   3626 HD12 ILE X 223     156.176 127.213 201.655  1.00  0.00           H
ATOM   3627 HD13 ILE X 223     156.832 125.625 202.151  1.00  0.00           H
ATOM   3628  C   ILE X 223     155.928 123.309 198.339  1.00  0.00           C
ATOM   3629  O   ILE X 223     157.032 122.837 198.721  1.00  0.00           O
ATOM   3630  N   ASP X 224     154.858 122.546 198.361  1.00  0.00           N
ATOM   3631  H   ASP X 224     153.987 122.971 198.075  1.00  0.00           H
ATOM   3632  CA  ASP X 224     154.831 121.115 198.699  1.00  0.00           C
ATOM   3633  HA  ASP X 224     155.431 120.859 199.573  1.00  0.00           H
ATOM   3634  CB  ASP X 224     153.393 120.660 199.098  1.00  0.00           C
ATOM   3635  HB2 ASP X 224     152.697 120.846 198.280  1.00  0.00           H
ATOM   3636  HB3 ASP X 224     153.466 119.613 199.392  1.00  0.00           H
ATOM   3637  CG  ASP X 224     152.798 121.347 200.308  1.00  0.00           C
ATOM   3638  OD1 ASP X 224     151.735 121.978 200.310  1.00  0.00           O
ATOM   3639  OD2 ASP X 224     153.437 121.164 201.382  1.00  0.00           O
ATOM   3640  C   ASP X 224     155.338 120.223 197.576  1.00  0.00           C
ATOM   3641  O   ASP X 224     155.548 119.051 197.787  1.00  0.00           O
ATOM   3642  N   TYR X 225     155.482 120.827 196.400  1.00  0.00           N
ATOM   3643  H   TYR X 225     155.091 121.758 196.433  1.00  0.00           H
ATOM   3644  CA  TYR X 225     155.837 120.240 195.138  1.00  0.00           C
ATOM   3645  HA  TYR X 225     155.474 119.212 195.168  1.00  0.00           H
ATOM   3646  CB  TYR X 225     155.036 120.953 194.025  1.00  0.00           C
ATOM   3647  HB2 TYR X 225     155.356 121.986 193.891  1.00  0.00           H
ATOM   3648  HB3 TYR X 225     155.366 120.484 193.098  1.00  0.00           H
ATOM   3649  CG  TYR X 225     153.513 120.835 194.145  1.00  0.00           C
ATOM   3650  CD1 TYR X 225     152.804 119.823 193.028  1.00  0.00           C
ATOM   3651  HD1 TYR X 225     153.386 119.343 192.256  1.00  0.00           H
ATOM   3652  CE1 TYR X 225     151.067 119.648 192.951  1.00  0.00           C
ATOM   3653  HE1 TYR X 225     150.604 119.183 192.093  1.00  0.00           H
ATOM   3654  CZ  TYR X 225     150.098 120.507 194.048  1.00  0.00           C
ATOM   3655  OH  TYR X 225     148.789 120.326 194.045  1.00  0.00           O
ATOM   3656  HH  TYR X 225     148.522 119.658 193.409  1.00  0.00           H
ATOM   3657  CE2 TYR X 225     150.815 121.625 195.235  1.00  0.00           C
ATOM   3658  HE2 TYR X 225     150.246 122.074 196.036  1.00  0.00           H
ATOM   3659  CD2 TYR X 225     152.549 121.759 195.267  1.00  0.00           C
ATOM   3660  HD2 TYR X 225     153.007 122.445 195.964  1.00  0.00           H
ATOM   3661  C   TYR X 225     157.374 120.158 194.980  1.00  0.00           C
ATOM   3662  O   TYR X 225     157.805 119.354 194.165  1.00  0.00           O
ATOM   3663  N   PHE X 226     158.194 120.961 195.743  1.00  0.00           N
ATOM   3664  H   PHE X 226     157.838 121.470 196.540  1.00  0.00           H
ATOM   3665  CA  PHE X 226     159.605 121.314 195.563  1.00  0.00           C
ATOM   3666  HA  PHE X 226     160.118 120.679 194.841  1.00  0.00           H
ATOM   3667  CB  PHE X 226     159.796 122.734 195.057  1.00  0.00           C
ATOM   3668  HB2 PHE X 226     159.629 123.333 195.952  1.00  0.00           H
ATOM   3669  HB3 PHE X 226     160.840 122.783 194.749  1.00  0.00           H
ATOM   3670  CG  PHE X 226     158.952 123.276 193.909  1.00  0.00           C
ATOM   3671  CD1 PHE X 226     158.076 124.358 194.138  1.00  0.00           C
ATOM   3672  HD1 PHE X 226     157.895 124.805 195.104  1.00  0.00           H
ATOM   3673  CE1 PHE X 226     157.236 124.844 193.149  1.00  0.00           C
ATOM   3674  HE1 PHE X 226     156.527 125.647 193.285  1.00  0.00           H
ATOM   3675  CZ  PHE X 226     157.359 124.268 191.826  1.00  0.00           C
ATOM   3676  HZ  PHE X 226     156.735 124.563 190.996  1.00  0.00           H
ATOM   3677  CE2 PHE X 226     158.203 123.197 191.603  1.00  0.00           C
ATOM   3678  HE2 PHE X 226     158.138 122.730 190.631  1.00  0.00           H
ATOM   3679  CD2 PHE X 226     159.003 122.692 192.660  1.00  0.00           C
ATOM   3680  HD2 PHE X 226     159.609 121.803 192.566  1.00  0.00           H
ATOM   3681  C   PHE X 226     160.381 121.123 196.874  1.00  0.00           C
ATOM   3682  O   PHE X 226     160.133 121.877 197.816  1.00  0.00           O
ATOM   3683  N   PRO X 227     161.289 120.061 196.994  1.00  0.00           N
ATOM   3684  CD  PRO X 227     161.861 119.221 195.931  1.00  0.00           C
ATOM   3685  HD2 PRO X 227     162.289 119.736 195.071  1.00  0.00           H
ATOM   3686  HD3 PRO X 227     161.065 118.611 195.504  1.00  0.00           H
ATOM   3687  CG  PRO X 227     162.959 118.448 196.590  1.00  0.00           C
ATOM   3688  HG2 PRO X 227     163.908 118.980 196.524  1.00  0.00           H
ATOM   3689  HG3 PRO X 227     163.023 117.417 196.241  1.00  0.00           H
ATOM   3690  CB  PRO X 227     162.624 118.389 198.126  1.00  0.00           C
ATOM   3691  HB2 PRO X 227     163.566 118.236 198.653  1.00  0.00           H
ATOM   3692  HB3 PRO X 227     162.094 117.461 198.337  1.00  0.00           H
ATOM   3693  CA  PRO X 227     161.805 119.661 198.318  1.00  0.00           C
ATOM   3694  HA  PRO X 227     160.965 119.485 198.989  1.00  0.00           H
ATOM   3695  C   PRO X 227     162.677 120.760 199.115  1.00  0.00           C
ATOM   3696  O   PRO X 227     162.505 120.891 200.324  1.00  0.00           O
ATOM   3697  N   GLY X 228     163.509 121.492 198.352  1.00  0.00           N
ATOM   3698  H   GLY X 228     163.271 121.523 197.371  1.00  0.00           H
ATOM   3699  CA  GLY X 228     164.438 122.437 198.960  1.00  0.00           C
ATOM   3700  HA2 GLY X 228     165.144 122.036 199.687  1.00  0.00           H
ATOM   3701  HA3 GLY X 228     165.146 122.829 198.230  1.00  0.00           H
ATOM   3702  C   GLY X 228     163.691 123.650 199.629  1.00  0.00           C
ATOM   3703  O   GLY X 228     164.316 124.306 200.482  1.00  0.00           O
ATOM   3704  N   THR X 229     162.386 123.830 199.305  1.00  0.00           N
ATOM   3705  H   THR X 229     161.976 123.354 198.515  1.00  0.00           H
ATOM   3706  CA  THR X 229     161.530 124.750 200.055  1.00  0.00           C
ATOM   3707  HA  THR X 229     161.972 125.738 199.924  1.00  0.00           H
ATOM   3708  CB  THR X 229     160.135 124.866 199.520  1.00  0.00           C
ATOM   3709  HB  THR X 229     159.543 125.557 200.120  1.00  0.00           H
ATOM   3710  CG2 THR X 229     159.986 125.197 198.033  1.00  0.00           C
ATOM   3711 HG21 THR X 229     158.965 125.291 197.664  1.00  0.00           H
ATOM   3712 HG22 THR X 229     160.663 124.469 197.586  1.00  0.00           H
ATOM   3713 HG23 THR X 229     160.524 126.128 197.851  1.00  0.00           H
ATOM   3714  OG1 THR X 229     159.445 123.692 199.618  1.00  0.00           O
ATOM   3715  HG1 THR X 229     159.659 123.064 198.924  1.00  0.00           H
ATOM   3716  C   THR X 229     161.431 124.441 201.614  1.00  0.00           C
ATOM   3717  O   THR X 229     161.551 125.325 202.411  1.00  0.00           O
ATOM   3718  N   HID X 230     161.304 123.172 202.034  1.00  0.00           N
ATOM   3719  H   HID X 230     161.312 122.477 201.301  1.00  0.00           H
ATOM   3720  CA  HID X 230     160.956 122.880 203.411  1.00  0.00           C
ATOM   3721  HA  HID X 230     161.207 123.651 204.140  1.00  0.00           H
ATOM   3722  CB  HID X 230     159.448 122.824 203.484  1.00  0.00           C
ATOM   3723  HB2 HID X 230     159.189 122.826 204.543  1.00  0.00           H
ATOM   3724  HB3 HID X 230     159.147 123.764 203.021  1.00  0.00           H
ATOM   3725  CG  HID X 230     158.717 121.722 202.693  1.00  0.00           C
ATOM   3726  ND1 HID X 230     158.660 121.549 201.328  1.00  0.00           N
ATOM   3727  HD1 HID X 230     158.694 122.240 200.592  1.00  0.00           H
ATOM   3728  CE1 HID X 230     158.121 120.332 201.046  1.00  0.00           C
ATOM   3729  HE1 HID X 230     157.905 120.032 200.032  1.00  0.00           H
ATOM   3730  NE2 HID X 230     157.801 119.691 202.212  1.00  0.00           N
ATOM   3731  CD2 HID X 230     158.218 120.528 203.237  1.00  0.00           C
ATOM   3732  HD2 HID X 230     158.160 120.253 204.279  1.00  0.00           H
ATOM   3733  C   HID X 230     161.580 121.544 203.997  1.00  0.00           C
ATOM   3734  O   HID X 230     161.587 121.344 205.191  1.00  0.00           O
ATOM   3735  N   ASN X 231     162.205 120.706 203.158  1.00  0.00           N
ATOM   3736  H   ASN X 231     162.234 120.955 202.180  1.00  0.00           H
ATOM   3737  CA  ASN X 231     162.651 119.354 203.574  1.00  0.00           C
ATOM   3738  HA  ASN X 231     161.813 118.902 204.106  1.00  0.00           H
ATOM   3739  CB  ASN X 231     162.767 118.489 202.299  1.00  0.00           C
ATOM   3740  HB2 ASN X 231     161.815 118.475 201.769  1.00  0.00           H
ATOM   3741  HB3 ASN X 231     163.462 118.903 201.568  1.00  0.00           H
ATOM   3742  CG  ASN X 231     163.255 117.063 202.451  1.00  0.00           C
ATOM   3743  OD1 ASN X 231     162.529 116.146 202.682  1.00  0.00           O
ATOM   3744  ND2 ASN X 231     164.549 116.761 202.426  1.00  0.00           N
ATOM   3745 HD21 ASN X 231     165.273 117.454 202.304  1.00  0.00           H
ATOM   3746 HD22 ASN X 231     164.861 115.822 202.223  1.00  0.00           H
ATOM   3747  C   ASN X 231     163.903 119.422 204.514  1.00  0.00           C
ATOM   3748  O   ASN X 231     163.961 118.621 205.486  1.00  0.00           O
ATOM   3749  N   LYS X 232     164.896 120.310 204.293  1.00  0.00           N
ATOM   3750  H   LYS X 232     164.733 121.001 203.574  1.00  0.00           H
ATOM   3751  CA  LYS X 232     166.022 120.261 205.224  1.00  0.00           C
ATOM   3752  HA  LYS X 232     166.226 119.266 205.619  1.00  0.00           H
ATOM   3753  CB  LYS X 232     167.304 120.839 204.564  1.00  0.00           C
ATOM   3754  HB2 LYS X 232     167.208 120.562 203.514  1.00  0.00           H
ATOM   3755  HB3 LYS X 232     167.369 121.922 204.666  1.00  0.00           H
ATOM   3756  CG  LYS X 232     168.557 120.225 205.189  1.00  0.00           C
ATOM   3757  HG2 LYS X 232     168.466 120.134 206.271  1.00  0.00           H
ATOM   3758  HG3 LYS X 232     168.641 119.186 204.869  1.00  0.00           H
ATOM   3759  CD  LYS X 232     169.879 120.966 204.817  1.00  0.00           C
ATOM   3760  HD2 LYS X 232     169.772 121.987 205.182  1.00  0.00           H
ATOM   3761  HD3 LYS X 232     170.625 120.480 205.445  1.00  0.00           H
ATOM   3762  CE  LYS X 232     170.267 120.966 203.361  1.00  0.00           C
ATOM   3763  HE2 LYS X 232     170.588 119.967 203.067  1.00  0.00           H
ATOM   3764  HE3 LYS X 232     169.440 121.231 202.703  1.00  0.00           H
ATOM   3765  NZ  LYS X 232     171.376 121.985 203.182  1.00  0.00           N
ATOM   3766  HZ1 LYS X 232     172.081 121.957 203.905  1.00  0.00           H
ATOM   3767  HZ2 LYS X 232     170.953 122.894 203.305  1.00  0.00           H
ATOM   3768  HZ3 LYS X 232     171.819 121.996 202.274  1.00  0.00           H
ATOM   3769  C   LYS X 232     165.732 121.112 206.434  1.00  0.00           C
ATOM   3770  O   LYS X 232     166.263 120.826 207.497  1.00  0.00           O
ATOM   3771  N   LEU X 233     164.758 122.084 206.335  1.00  0.00           N
ATOM   3772  H   LEU X 233     164.361 122.272 205.425  1.00  0.00           H
ATOM   3773  CA  LEU X 233     164.220 122.833 207.427  1.00  0.00           C
ATOM   3774  HA  LEU X 233     164.988 123.281 208.057  1.00  0.00           H
ATOM   3775  CB  LEU X 233     163.201 123.965 206.966  1.00  0.00           C
ATOM   3776  HB2 LEU X 233     163.393 124.325 205.955  1.00  0.00           H
ATOM   3777  HB3 LEU X 233     162.199 123.540 207.026  1.00  0.00           H
ATOM   3778  CG  LEU X 233     163.224 125.193 207.900  1.00  0.00           C
ATOM   3779  HG  LEU X 233     164.162 125.728 207.752  1.00  0.00           H
ATOM   3780  CD1 LEU X 233     162.044 126.150 207.578  1.00  0.00           C
ATOM   3781 HD11 LEU X 233     162.193 126.443 206.538  1.00  0.00           H
ATOM   3782 HD12 LEU X 233     162.007 127.040 208.206  1.00  0.00           H
ATOM   3783 HD13 LEU X 233     161.095 125.633 207.722  1.00  0.00           H
ATOM   3784  CD2 LEU X 233     163.062 124.891 209.337  1.00  0.00           C
ATOM   3785 HD21 LEU X 233     162.218 124.230 209.535  1.00  0.00           H
ATOM   3786 HD22 LEU X 233     163.923 124.462 209.850  1.00  0.00           H
ATOM   3787 HD23 LEU X 233     162.866 125.811 209.889  1.00  0.00           H
ATOM   3788  C   LEU X 233     163.522 121.842 208.436  1.00  0.00           C
ATOM   3789  O   LEU X 233     163.731 121.857 209.677  1.00  0.00           O
ATOM   3790  N   LEU X 234     162.737 120.876 207.887  1.00  0.00           N
ATOM   3791  H   LEU X 234     162.332 121.038 206.976  1.00  0.00           H
ATOM   3792  CA  LEU X 234     162.243 119.849 208.731  1.00  0.00           C
ATOM   3793  HA  LEU X 234     161.760 120.396 209.540  1.00  0.00           H
ATOM   3794  CB  LEU X 234     161.266 119.000 207.922  1.00  0.00           C
ATOM   3795  HB2 LEU X 234     161.631 118.620 206.968  1.00  0.00           H
ATOM   3796  HB3 LEU X 234     160.975 118.143 208.531  1.00  0.00           H
ATOM   3797  CG  LEU X 234     159.900 119.726 207.573  1.00  0.00           C
ATOM   3798  HG  LEU X 234     160.037 120.585 206.916  1.00  0.00           H
ATOM   3799  CD1 LEU X 234     159.054 118.693 206.793  1.00  0.00           C
ATOM   3800 HD11 LEU X 234     159.494 118.577 205.802  1.00  0.00           H
ATOM   3801 HD12 LEU X 234     158.023 119.016 206.655  1.00  0.00           H
ATOM   3802 HD13 LEU X 234     159.024 117.788 207.399  1.00  0.00           H
ATOM   3803  CD2 LEU X 234     159.044 120.003 208.808  1.00  0.00           C
ATOM   3804 HD21 LEU X 234     159.407 120.822 209.428  1.00  0.00           H
ATOM   3805 HD22 LEU X 234     158.065 120.419 208.568  1.00  0.00           H
ATOM   3806 HD23 LEU X 234     159.054 119.130 209.461  1.00  0.00           H
ATOM   3807  C   LEU X 234     163.296 118.887 209.362  1.00  0.00           C
ATOM   3808  O   LEU X 234     163.048 118.321 210.437  1.00  0.00           O
ATOM   3809  N   LYS X 235     164.393 118.722 208.625  1.00  0.00           N
ATOM   3810  H   LYS X 235     164.281 119.117 207.702  1.00  0.00           H
ATOM   3811  CA  LYS X 235     165.502 117.872 209.079  1.00  0.00           C
ATOM   3812  HA  LYS X 235     165.233 116.921 209.537  1.00  0.00           H
ATOM   3813  CB  LYS X 235     166.314 117.607 207.849  1.00  0.00           C
ATOM   3814  HB2 LYS X 235     165.639 117.603 206.993  1.00  0.00           H
ATOM   3815  HB3 LYS X 235     167.067 118.352 207.592  1.00  0.00           H
ATOM   3816  CG  LYS X 235     167.125 116.279 207.823  1.00  0.00           C
ATOM   3817  HG2 LYS X 235     167.898 116.221 208.589  1.00  0.00           H
ATOM   3818  HG3 LYS X 235     166.353 115.549 208.068  1.00  0.00           H
ATOM   3819  CD  LYS X 235     167.609 115.899 206.411  1.00  0.00           C
ATOM   3820  HD2 LYS X 235     168.003 116.753 205.860  1.00  0.00           H
ATOM   3821  HD3 LYS X 235     168.414 115.176 206.546  1.00  0.00           H
ATOM   3822  CE  LYS X 235     166.627 115.086 205.542  1.00  0.00           C
ATOM   3823  HE2 LYS X 235     166.139 114.242 206.029  1.00  0.00           H
ATOM   3824  HE3 LYS X 235     165.814 115.699 205.155  1.00  0.00           H
ATOM   3825  NZ  LYS X 235     167.382 114.536 204.405  1.00  0.00           N
ATOM   3826  HZ1 LYS X 235     168.225 114.110 204.762  1.00  0.00           H
ATOM   3827  HZ2 LYS X 235     167.698 115.208 203.721  1.00  0.00           H
ATOM   3828  HZ3 LYS X 235     166.912 113.737 204.004  1.00  0.00           H
ATOM   3829  C   LYS X 235     166.192 118.633 210.187  1.00  0.00           C
ATOM   3830  O   LYS X 235     166.384 118.022 211.274  1.00  0.00           O
ATOM   3831  N   ASN X 236     166.482 119.941 210.107  1.00  0.00           N
ATOM   3832  H   ASN X 236     166.260 120.408 209.239  1.00  0.00           H
ATOM   3833  CA  ASN X 236     167.130 120.755 211.129  1.00  0.00           C
ATOM   3834  HA  ASN X 236     167.972 120.204 211.548  1.00  0.00           H
ATOM   3835  CB  ASN X 236     167.652 122.029 210.493  1.00  0.00           C
ATOM   3836  HB2 ASN X 236     166.812 122.429 209.925  1.00  0.00           H
ATOM   3837  HB3 ASN X 236     168.059 122.684 211.263  1.00  0.00           H
ATOM   3838  CG  ASN X 236     168.715 121.745 209.381  1.00  0.00           C
ATOM   3839  OD1 ASN X 236     169.470 120.808 209.270  1.00  0.00           O
ATOM   3840  ND2 ASN X 236     168.757 122.739 208.527  1.00  0.00           N
ATOM   3841 HD21 ASN X 236     168.250 123.571 208.789  1.00  0.00           H
ATOM   3842 HD22 ASN X 236     169.363 122.634 207.726  1.00  0.00           H
ATOM   3843  C   ASN X 236     166.247 121.016 212.386  1.00  0.00           C
ATOM   3844  O   ASN X 236     166.717 121.160 213.512  1.00  0.00           O
ATOM   3845  N   LEU X 237     164.894 121.093 212.237  1.00  0.00           N
ATOM   3846  H   LEU X 237     164.475 121.206 211.325  1.00  0.00           H
ATOM   3847  CA  LEU X 237     164.016 121.028 213.446  1.00  0.00           C
ATOM   3848  HA  LEU X 237     164.397 121.746 214.172  1.00  0.00           H
ATOM   3849  CB  LEU X 237     162.710 121.533 213.072  1.00  0.00           C
ATOM   3850  HB2 LEU X 237     162.217 120.825 212.405  1.00  0.00           H
ATOM   3851  HB3 LEU X 237     162.068 121.409 213.944  1.00  0.00           H
ATOM   3852  CG  LEU X 237     162.613 123.017 212.661  1.00  0.00           C
ATOM   3853  HG  LEU X 237     163.419 123.161 211.941  1.00  0.00           H
ATOM   3854  CD1 LEU X 237     161.262 123.219 211.957  1.00  0.00           C
ATOM   3855 HD11 LEU X 237     161.038 124.273 211.791  1.00  0.00           H
ATOM   3856 HD12 LEU X 237     160.509 122.780 212.611  1.00  0.00           H
ATOM   3857 HD13 LEU X 237     161.363 122.746 210.980  1.00  0.00           H
ATOM   3858  CD2 LEU X 237     162.722 124.012 213.807  1.00  0.00           C
ATOM   3859 HD21 LEU X 237     163.713 123.966 214.259  1.00  0.00           H
ATOM   3860 HD22 LEU X 237     162.438 124.946 213.322  1.00  0.00           H
ATOM   3861 HD23 LEU X 237     161.966 123.818 214.569  1.00  0.00           H
ATOM   3862  C   LEU X 237     163.931 119.655 214.115  1.00  0.00           C
ATOM   3863  O   LEU X 237     163.929 119.599 215.343  1.00  0.00           O
ATOM   3864  N   ALA X 238     164.120 118.620 213.340  1.00  0.00           N
ATOM   3865  H   ALA X 238     164.180 118.684 212.334  1.00  0.00           H
ATOM   3866  CA  ALA X 238     164.172 117.241 213.834  1.00  0.00           C
ATOM   3867  HA  ALA X 238     163.247 117.021 214.368  1.00  0.00           H
ATOM   3868  CB  ALA X 238     163.940 116.243 212.635  1.00  0.00           C
ATOM   3869  HB1 ALA X 238     164.789 116.221 211.952  1.00  0.00           H
ATOM   3870  HB2 ALA X 238     163.039 116.483 212.070  1.00  0.00           H
ATOM   3871  HB3 ALA X 238     163.744 115.277 213.100  1.00  0.00           H
ATOM   3872  C   ALA X 238     165.479 117.000 214.549  1.00  0.00           C
ATOM   3873  O   ALA X 238     165.475 116.335 215.576  1.00  0.00           O
ATOM   3874  N   PHE X 239     166.600 117.635 214.170  1.00  0.00           N
ATOM   3875  H   PHE X 239     166.633 118.028 213.240  1.00  0.00           H
ATOM   3876  CA  PHE X 239     167.782 117.768 214.975  1.00  0.00           C
ATOM   3877  HA  PHE X 239     168.193 116.768 215.118  1.00  0.00           H
ATOM   3878  CB  PHE X 239     168.757 118.595 214.168  1.00  0.00           C
ATOM   3879  HB2 PHE X 239     169.360 117.989 213.491  1.00  0.00           H
ATOM   3880  HB3 PHE X 239     168.165 119.174 213.459  1.00  0.00           H
ATOM   3881  CG  PHE X 239     169.815 119.362 214.912  1.00  0.00           C
ATOM   3882  CD1 PHE X 239     171.110 118.758 215.086  1.00  0.00           C
ATOM   3883  HD1 PHE X 239     171.257 117.742 214.749  1.00  0.00           H
ATOM   3884  CE1 PHE X 239     172.272 119.544 215.313  1.00  0.00           C
ATOM   3885  HE1 PHE X 239     173.196 119.015 215.495  1.00  0.00           H
ATOM   3886  CZ  PHE X 239     172.070 120.889 215.696  1.00  0.00           C
ATOM   3887  HZ  PHE X 239     172.824 121.544 216.105  1.00  0.00           H
ATOM   3888  CE2 PHE X 239     170.817 121.458 215.571  1.00  0.00           C
ATOM   3889  HE2 PHE X 239     170.819 122.514 215.795  1.00  0.00           H
ATOM   3890  CD2 PHE X 239     169.633 120.756 215.195  1.00  0.00           C
ATOM   3891  HD2 PHE X 239     168.679 121.238 215.038  1.00  0.00           H
ATOM   3892  C   PHE X 239     167.573 118.425 216.448  1.00  0.00           C
ATOM   3893  O   PHE X 239     167.980 117.946 217.487  1.00  0.00           O
ATOM   3894  N   MET X 240     166.865 119.541 216.458  1.00  0.00           N
ATOM   3895  H   MET X 240     166.525 119.856 215.560  1.00  0.00           H
ATOM   3896  CA  MET X 240     166.518 120.343 217.648  1.00  0.00           C
ATOM   3897  HA  MET X 240     167.397 120.507 218.272  1.00  0.00           H
ATOM   3898  CB  MET X 240     166.062 121.686 217.277  1.00  0.00           C
ATOM   3899  HB2 MET X 240     166.637 121.980 216.399  1.00  0.00           H
ATOM   3900  HB3 MET X 240     165.035 121.614 216.919  1.00  0.00           H
ATOM   3901  CG  MET X 240     166.122 122.702 218.403  1.00  0.00           C
ATOM   3902  HG2 MET X 240     165.590 123.611 218.123  1.00  0.00           H
ATOM   3903  HG3 MET X 240     165.477 122.214 219.133  1.00  0.00           H
ATOM   3904  SD  MET X 240     167.628 123.050 219.282  1.00  0.00           S
ATOM   3905  CE  MET X 240     168.762 123.703 218.038  1.00  0.00           C
ATOM   3906  HE1 MET X 240     168.258 124.507 217.501  1.00  0.00           H
ATOM   3907  HE2 MET X 240     169.710 124.013 218.477  1.00  0.00           H
ATOM   3908  HE3 MET X 240     169.010 122.883 217.363  1.00  0.00           H
ATOM   3909  C   MET X 240     165.462 119.616 218.569  1.00  0.00           C
ATOM   3910  O   MET X 240     165.666 119.478 219.803  1.00  0.00           O
ATOM   3911  N   GLU X 241     164.541 118.977 217.893  1.00  0.00           N
ATOM   3912  H   GLU X 241     164.653 118.919 216.891  1.00  0.00           H
ATOM   3913  CA  GLU X 241     163.680 118.009 218.604  1.00  0.00           C
ATOM   3914  HA  GLU X 241     163.131 118.564 219.365  1.00  0.00           H
ATOM   3915  CB  GLU X 241     162.602 117.538 217.617  1.00  0.00           C
ATOM   3916  HB2 GLU X 241     162.243 118.441 217.124  1.00  0.00           H
ATOM   3917  HB3 GLU X 241     163.063 116.885 216.876  1.00  0.00           H
ATOM   3918  CG  GLU X 241     161.495 116.731 218.428  1.00  0.00           C
ATOM   3919  HG2 GLU X 241     161.989 115.929 218.977  1.00  0.00           H
ATOM   3920  HG3 GLU X 241     161.174 117.405 219.222  1.00  0.00           H
ATOM   3921  CD  GLU X 241     160.232 116.328 217.724  1.00  0.00           C
ATOM   3922  OE1 GLU X 241     160.197 116.398 216.510  1.00  0.00           O
ATOM   3923  OE2 GLU X 241     159.190 116.014 218.355  1.00  0.00           O
ATOM   3924  C   GLU X 241     164.459 116.847 219.329  1.00  0.00           C
ATOM   3925  O   GLU X 241     164.314 116.735 220.524  1.00  0.00           O
ATOM   3926  N   SER X 242     165.277 116.092 218.560  1.00  0.00           N
ATOM   3927  H   SER X 242     165.395 116.251 217.569  1.00  0.00           H
ATOM   3928  CA  SER X 242     166.148 114.974 219.126  1.00  0.00           C
ATOM   3929  HA  SER X 242     165.670 114.052 219.458  1.00  0.00           H
ATOM   3930  CB  SER X 242     167.072 114.473 217.997  1.00  0.00           C
ATOM   3931  HB2 SER X 242     167.582 115.349 217.597  1.00  0.00           H
ATOM   3932  HB3 SER X 242     167.876 113.878 218.430  1.00  0.00           H
ATOM   3933  OG  SER X 242     166.311 113.791 217.066  1.00  0.00           O
ATOM   3934  HG  SER X 242     165.823 113.025 217.379  1.00  0.00           H
ATOM   3935  C   SER X 242     167.090 115.439 220.295  1.00  0.00           C
ATOM   3936  O   SER X 242     167.449 114.613 221.083  1.00  0.00           O
ATOM   3937  N   ASP X 243     167.297 116.761 220.473  1.00  0.00           N
ATOM   3938  H   ASP X 243     166.860 117.375 219.801  1.00  0.00           H
ATOM   3939  CA  ASP X 243     167.953 117.302 221.668  1.00  0.00           C
ATOM   3940  HA  ASP X 243     168.606 116.537 222.088  1.00  0.00           H
ATOM   3941  CB  ASP X 243     168.756 118.615 221.442  1.00  0.00           C
ATOM   3942  HB2 ASP X 243     169.242 118.407 220.489  1.00  0.00           H
ATOM   3943  HB3 ASP X 243     168.111 119.490 221.362  1.00  0.00           H
ATOM   3944  CG  ASP X 243     169.755 118.997 222.510  1.00  0.00           C
ATOM   3945  OD1 ASP X 243     170.376 120.074 222.445  1.00  0.00           O
ATOM   3946  OD2 ASP X 243     170.085 118.152 223.392  1.00  0.00           O
ATOM   3947  C   ASP X 243     166.940 117.600 222.781  1.00  0.00           C
ATOM   3948  O   ASP X 243     166.930 116.994 223.870  1.00  0.00           O
ATOM   3949  N   ILE X 244     165.949 118.417 222.521  1.00  0.00           N
ATOM   3950  H   ILE X 244     165.826 118.774 221.584  1.00  0.00           H
ATOM   3951  CA  ILE X 244     164.837 118.753 223.434  1.00  0.00           C
ATOM   3952  HA  ILE X 244     165.244 119.254 224.312  1.00  0.00           H
ATOM   3953  CB  ILE X 244     163.885 119.820 222.808  1.00  0.00           C
ATOM   3954  HB  ILE X 244     163.450 119.578 221.839  1.00  0.00           H
ATOM   3955  CG2 ILE X 244     162.633 120.144 223.752  1.00  0.00           C
ATOM   3956 HG21 ILE X 244     162.894 120.352 224.790  1.00  0.00           H
ATOM   3957 HG22 ILE X 244     161.908 119.338 223.869  1.00  0.00           H
ATOM   3958 HG23 ILE X 244     162.018 120.998 223.469  1.00  0.00           H
ATOM   3959  CG1 ILE X 244     164.685 121.147 222.679  1.00  0.00           C
ATOM   3960 HG12 ILE X 244     164.971 121.452 223.686  1.00  0.00           H
ATOM   3961 HG13 ILE X 244     165.554 120.948 222.052  1.00  0.00           H
ATOM   3962  CD1 ILE X 244     164.079 122.393 222.046  1.00  0.00           C
ATOM   3963 HD11 ILE X 244     163.661 122.179 221.062  1.00  0.00           H
ATOM   3964 HD12 ILE X 244     164.791 123.214 221.963  1.00  0.00           H
ATOM   3965 HD13 ILE X 244     163.196 122.763 222.566  1.00  0.00           H
ATOM   3966  C   ILE X 244     164.039 117.546 224.038  1.00  0.00           C
ATOM   3967  O   ILE X 244     163.683 117.633 225.202  1.00  0.00           O
ATOM   3968  N   LEU X 245     163.872 116.432 223.314  1.00  0.00           N
ATOM   3969  H   LEU X 245     164.235 116.445 222.371  1.00  0.00           H
ATOM   3970  CA  LEU X 245     163.481 115.112 223.865  1.00  0.00           C
ATOM   3971  HA  LEU X 245     162.534 115.216 224.394  1.00  0.00           H
ATOM   3972  CB  LEU X 245     163.312 114.146 222.700  1.00  0.00           C
ATOM   3973  HB2 LEU X 245     164.299 114.225 222.243  1.00  0.00           H
ATOM   3974  HB3 LEU X 245     163.166 113.144 223.105  1.00  0.00           H
ATOM   3975  CG  LEU X 245     162.266 114.452 221.618  1.00  0.00           C
ATOM   3976  HG  LEU X 245     162.248 115.493 221.297  1.00  0.00           H
ATOM   3977  CD1 LEU X 245     162.524 113.605 220.370  1.00  0.00           C
ATOM   3978 HD11 LEU X 245     161.626 113.677 219.756  1.00  0.00           H
ATOM   3979 HD12 LEU X 245     162.587 112.539 220.587  1.00  0.00           H
ATOM   3980 HD13 LEU X 245     163.436 114.034 219.954  1.00  0.00           H
ATOM   3981  CD2 LEU X 245     160.824 114.205 222.056  1.00  0.00           C
ATOM   3982 HD21 LEU X 245     160.526 114.880 222.859  1.00  0.00           H
ATOM   3983 HD22 LEU X 245     160.184 114.139 221.177  1.00  0.00           H
ATOM   3984 HD23 LEU X 245     160.706 113.209 222.483  1.00  0.00           H
ATOM   3985  C   LEU X 245     164.399 114.586 224.994  1.00  0.00           C
ATOM   3986  O   LEU X 245     163.872 114.063 226.038  1.00  0.00           O
ATOM   3987  N   GLU X 246     165.724 114.656 224.826  1.00  0.00           N
ATOM   3988  H   GLU X 246     166.083 115.230 224.076  1.00  0.00           H
ATOM   3989  CA  GLU X 246     166.678 114.363 225.911  1.00  0.00           C
ATOM   3990  HA  GLU X 246     166.409 113.397 226.339  1.00  0.00           H
ATOM   3991  CB  GLU X 246     168.157 114.309 225.388  1.00  0.00           C
ATOM   3992  HB2 GLU X 246     168.375 115.262 224.908  1.00  0.00           H
ATOM   3993  HB3 GLU X 246     168.873 114.170 226.199  1.00  0.00           H
ATOM   3994  CG  GLU X 246     168.299 113.128 224.385  1.00  0.00           C
ATOM   3995  HG2 GLU X 246     167.636 113.351 223.549  1.00  0.00           H
ATOM   3996  HG3 GLU X 246     169.301 113.038 223.966  1.00  0.00           H
ATOM   3997  CD  GLU X 246     167.840 111.721 224.895  1.00  0.00           C
ATOM   3998  OE1 GLU X 246     167.881 111.370 226.107  1.00  0.00           O
ATOM   3999  OE2 GLU X 246     167.390 110.906 223.985  1.00  0.00           O
ATOM   4000  C   GLU X 246     166.527 115.405 227.009  1.00  0.00           C
ATOM   4001  O   GLU X 246     166.273 115.017 228.195  1.00  0.00           O
ATOM   4002  N   LYS X 247     166.821 116.673 226.765  1.00  0.00           N
ATOM   4003  H   LYS X 247     167.012 116.968 225.818  1.00  0.00           H
ATOM   4004  CA  LYS X 247     166.830 117.771 227.856  1.00  0.00           C
ATOM   4005  HA  LYS X 247     167.571 117.524 228.616  1.00  0.00           H
ATOM   4006  CB  LYS X 247     167.120 119.081 227.204  1.00  0.00           C
ATOM   4007  HB2 LYS X 247     166.585 119.141 226.256  1.00  0.00           H
ATOM   4008  HB3 LYS X 247     166.820 119.938 227.806  1.00  0.00           H
ATOM   4009  CG  LYS X 247     168.572 119.199 226.976  1.00  0.00           C
ATOM   4010  HG2 LYS X 247     168.966 119.186 227.992  1.00  0.00           H
ATOM   4011  HG3 LYS X 247     168.974 118.357 226.412  1.00  0.00           H
ATOM   4012  CD  LYS X 247     169.074 120.506 226.269  1.00  0.00           C
ATOM   4013  HD2 LYS X 247     168.816 120.478 225.210  1.00  0.00           H
ATOM   4014  HD3 LYS X 247     168.597 121.381 226.711  1.00  0.00           H
ATOM   4015  CE  LYS X 247     170.617 120.725 226.148  1.00  0.00           C
ATOM   4016  HE2 LYS X 247     170.810 121.746 225.818  1.00  0.00           H
ATOM   4017  HE3 LYS X 247     171.195 120.471 227.037  1.00  0.00           H
ATOM   4018  NZ  LYS X 247     171.253 119.951 225.043  1.00  0.00           N
ATOM   4019  HZ1 LYS X 247     171.034 118.979 225.205  1.00  0.00           H
ATOM   4020  HZ2 LYS X 247     172.235 120.183 225.089  1.00  0.00           H
ATOM   4021  HZ3 LYS X 247     170.895 120.036 224.103  1.00  0.00           H
ATOM   4022  C   LYS X 247     165.458 117.887 228.563  1.00  0.00           C
ATOM   4023  O   LYS X 247     165.478 118.431 229.633  1.00  0.00           O
ATOM   4024  N   VAL X 248     164.378 117.343 228.056  1.00  0.00           N
ATOM   4025  H   VAL X 248     164.418 117.156 227.065  1.00  0.00           H
ATOM   4026  CA  VAL X 248     163.055 117.132 228.695  1.00  0.00           C
ATOM   4027  HA  VAL X 248     162.794 118.060 229.203  1.00  0.00           H
ATOM   4028  CB  VAL X 248     161.913 117.182 227.677  1.00  0.00           C
ATOM   4029  HB  VAL X 248     162.261 116.480 226.920  1.00  0.00           H
ATOM   4030  CG1 VAL X 248     160.637 116.648 228.242  1.00  0.00           C
ATOM   4031 HG11 VAL X 248     160.210 117.348 228.960  1.00  0.00           H
ATOM   4032 HG12 VAL X 248     159.891 116.563 227.451  1.00  0.00           H
ATOM   4033 HG13 VAL X 248     160.720 115.683 228.741  1.00  0.00           H
ATOM   4034  CG2 VAL X 248     161.751 118.647 227.122  1.00  0.00           C
ATOM   4035 HG21 VAL X 248     161.298 119.154 227.974  1.00  0.00           H
ATOM   4036 HG22 VAL X 248     161.126 118.804 226.243  1.00  0.00           H
ATOM   4037 HG23 VAL X 248     162.752 119.057 226.981  1.00  0.00           H
ATOM   4038  C   VAL X 248     162.932 116.133 229.853  1.00  0.00           C
ATOM   4039  O   VAL X 248     162.210 116.388 230.832  1.00  0.00           O
ATOM   4040  N   LYS X 249     163.766 115.158 229.750  1.00  0.00           N
ATOM   4041  H   LYS X 249     164.379 115.262 228.955  1.00  0.00           H
ATOM   4042  CA  LYS X 249     163.817 113.933 230.671  1.00  0.00           C
ATOM   4043  HA  LYS X 249     163.104 114.155 231.465  1.00  0.00           H
ATOM   4044  CB  LYS X 249     163.391 112.690 229.795  1.00  0.00           C
ATOM   4045  HB2 LYS X 249     163.471 112.851 228.720  1.00  0.00           H
ATOM   4046  HB3 LYS X 249     163.995 111.826 230.072  1.00  0.00           H
ATOM   4047  CG  LYS X 249     161.860 112.374 229.808  1.00  0.00           C
ATOM   4048  HG2 LYS X 249     161.336 113.329 229.778  1.00  0.00           H
ATOM   4049  HG3 LYS X 249     161.583 111.746 228.961  1.00  0.00           H
ATOM   4050  CD  LYS X 249     161.520 111.539 231.057  1.00  0.00           C
ATOM   4051  HD2 LYS X 249     162.119 110.632 230.985  1.00  0.00           H
ATOM   4052  HD3 LYS X 249     161.825 112.120 231.927  1.00  0.00           H
ATOM   4053  CE  LYS X 249     160.058 111.381 231.083  1.00  0.00           C
ATOM   4054  HE2 LYS X 249     159.666 112.394 231.177  1.00  0.00           H
ATOM   4055  HE3 LYS X 249     159.814 110.956 230.110  1.00  0.00           H
ATOM   4056  NZ  LYS X 249     159.706 110.577 232.230  1.00  0.00           N
ATOM   4057  HZ1 LYS X 249     159.659 109.598 231.984  1.00  0.00           H
ATOM   4058  HZ2 LYS X 249     158.722 110.679 232.433  1.00  0.00           H
ATOM   4059  HZ3 LYS X 249     160.271 110.754 233.048  1.00  0.00           H
ATOM   4060  C   LYS X 249     165.130 113.738 231.395  1.00  0.00           C
ATOM   4061  O   LYS X 249     165.121 113.109 232.426  1.00  0.00           O
ATOM   4062  N   GLU X 250     166.273 114.164 230.835  1.00  0.00           N
ATOM   4063  H   GLU X 250     166.244 114.767 230.025  1.00  0.00           H
ATOM   4064  CA  GLU X 250     167.563 113.583 231.229  1.00  0.00           C
ATOM   4065  HA  GLU X 250     167.488 112.515 231.026  1.00  0.00           H
ATOM   4066  CB  GLU X 250     168.646 113.982 230.254  1.00  0.00           C
ATOM   4067  HB2 GLU X 250     168.302 113.639 229.278  1.00  0.00           H
ATOM   4068  HB3 GLU X 250     168.745 115.067 230.266  1.00  0.00           H
ATOM   4069  CG  GLU X 250     170.021 113.341 230.603  1.00  0.00           C
ATOM   4070  HG2 GLU X 250     170.757 113.705 229.886  1.00  0.00           H
ATOM   4071  HG3 GLU X 250     170.403 113.690 231.563  1.00  0.00           H
ATOM   4072  CD  GLU X 250     170.020 111.807 230.546  1.00  0.00           C
ATOM   4073  OE1 GLU X 250     169.408 111.196 229.623  1.00  0.00           O
ATOM   4074  OE2 GLU X 250     170.581 111.168 231.462  1.00  0.00           O
ATOM   4075  C   GLU X 250     167.869 113.953 232.689  1.00  0.00           C
ATOM   4076  O   GLU X 250     168.562 113.185 233.369  1.00  0.00           O
ATOM   4077  N   HID X 251     167.423 115.159 233.161  1.00  0.00           N
ATOM   4078  H   HID X 251     166.753 115.608 232.553  1.00  0.00           H
ATOM   4079  CA  HID X 251     167.845 115.812 234.368  1.00  0.00           C
ATOM   4080  HA  HID X 251     168.581 115.189 234.876  1.00  0.00           H
ATOM   4081  CB  HID X 251     168.417 117.151 233.993  1.00  0.00           C
ATOM   4082  HB2 HID X 251     167.588 117.841 233.835  1.00  0.00           H
ATOM   4083  HB3 HID X 251     168.983 117.631 234.791  1.00  0.00           H
ATOM   4084  CG  HID X 251     169.301 117.230 232.682  1.00  0.00           C
ATOM   4085  ND1 HID X 251     170.548 116.667 232.642  1.00  0.00           N
ATOM   4086  HD1 HID X 251     171.147 116.381 233.404  1.00  0.00           H
ATOM   4087  CE1 HID X 251     171.001 116.827 231.417  1.00  0.00           C
ATOM   4088  HE1 HID X 251     171.990 116.529 231.101  1.00  0.00           H
ATOM   4089  NE2 HID X 251     170.038 117.298 230.620  1.00  0.00           N
ATOM   4090  CD2 HID X 251     168.958 117.584 231.426  1.00  0.00           C
ATOM   4091  HD2 HID X 251     168.005 117.981 231.108  1.00  0.00           H
ATOM   4092  C   HID X 251     166.795 115.871 235.570  1.00  0.00           C
ATOM   4093  O   HID X 251     166.859 116.601 236.619  1.00  0.00           O
ATOM   4094  N   GLN X 252     165.702 115.159 235.393  1.00  0.00           N
ATOM   4095  H   GLN X 252     165.655 114.488 234.640  1.00  0.00           H
ATOM   4096  CA  GLN X 252     164.602 115.076 236.313  1.00  0.00           C
ATOM   4097  HA  GLN X 252     164.239 116.075 236.555  1.00  0.00           H
ATOM   4098  CB  GLN X 252     163.512 114.336 235.523  1.00  0.00           C
ATOM   4099  HB2 GLN X 252     163.802 113.351 235.158  1.00  0.00           H
ATOM   4100  HB3 GLN X 252     162.764 114.103 236.281  1.00  0.00           H
ATOM   4101  CG  GLN X 252     162.809 114.961 234.347  1.00  0.00           C
ATOM   4102  HG2 GLN X 252     162.598 116.019 234.508  1.00  0.00           H
ATOM   4103  HG3 GLN X 252     163.421 114.938 233.446  1.00  0.00           H
ATOM   4104  CD  GLN X 252     161.449 114.414 233.936  1.00  0.00           C
ATOM   4105  OE1 GLN X 252     161.110 113.355 234.321  1.00  0.00           O
ATOM   4106  NE2 GLN X 252     160.801 114.976 232.932  1.00  0.00           N
ATOM   4107 HE21 GLN X 252     159.910 114.526 232.783  1.00  0.00           H
ATOM   4108 HE22 GLN X 252     161.127 115.696 232.303  1.00  0.00           H
ATOM   4109  C   GLN X 252     164.930 114.328 237.640  1.00  0.00           C
ATOM   4110  O   GLN X 252     164.186 114.709 238.561  1.00  0.00           O
ATOM   4111  N   GLU X 253     165.956 113.503 237.800  1.00  0.00           N
ATOM   4112  H   GLU X 253     166.485 113.165 237.009  1.00  0.00           H
ATOM   4113  CA  GLU X 253     166.207 112.848 239.076  1.00  0.00           C
ATOM   4114  HA  GLU X 253     165.284 112.325 239.325  1.00  0.00           H
ATOM   4115  CB  GLU X 253     167.377 111.795 238.941  1.00  0.00           C
ATOM   4116  HB2 GLU X 253     167.137 110.980 239.624  1.00  0.00           H
ATOM   4117  HB3 GLU X 253     167.301 111.419 237.921  1.00  0.00           H
ATOM   4118  CG  GLU X 253     168.771 112.329 239.087  1.00  0.00           C
ATOM   4119  HG2 GLU X 253     168.911 112.808 240.056  1.00  0.00           H
ATOM   4120  HG3 GLU X 253     169.409 111.445 239.093  1.00  0.00           H
ATOM   4121  CD  GLU X 253     169.203 113.255 237.904  1.00  0.00           C
ATOM   4122  OE1 GLU X 253     169.334 112.664 236.823  1.00  0.00           O
ATOM   4123  OE2 GLU X 253     169.247 114.451 238.150  1.00  0.00           O
ATOM   4124  C   GLU X 253     166.539 113.868 240.232  1.00  0.00           C
ATOM   4125  O   GLU X 253     166.522 113.477 241.442  1.00  0.00           O
ATOM   4126  N   SER X 254     167.016 115.065 239.910  1.00  0.00           N
ATOM   4127  H   SER X 254     167.203 115.325 238.952  1.00  0.00           H
ATOM   4128  CA  SER X 254     167.410 116.073 240.844  1.00  0.00           C
ATOM   4129  HA  SER X 254     167.067 115.805 241.844  1.00  0.00           H
ATOM   4130  CB  SER X 254     168.956 116.212 240.877  1.00  0.00           C
ATOM   4131  HB2 SER X 254     169.303 116.990 241.558  1.00  0.00           H
ATOM   4132  HB3 SER X 254     169.392 115.248 241.139  1.00  0.00           H
ATOM   4133  OG  SER X 254     169.548 116.478 239.617  1.00  0.00           O
ATOM   4134  HG  SER X 254     169.500 115.724 239.025  1.00  0.00           H
ATOM   4135  C   SER X 254     166.808 117.386 240.579  1.00  0.00           C
ATOM   4136  O   SER X 254     167.217 118.405 241.073  1.00  0.00           O
ATOM   4137  N   MET X 255     165.748 117.331 239.777  1.00  0.00           N
ATOM   4138  H   MET X 255     165.414 116.400 239.575  1.00  0.00           H
ATOM   4139  CA  MET X 255     164.828 118.526 239.550  1.00  0.00           C
ATOM   4140  HA  MET X 255     165.466 119.313 239.148  1.00  0.00           H
ATOM   4141  CB  MET X 255     163.764 118.203 238.573  1.00  0.00           C
ATOM   4142  HB2 MET X 255     163.987 117.585 237.704  1.00  0.00           H
ATOM   4143  HB3 MET X 255     163.078 117.572 239.138  1.00  0.00           H
ATOM   4144  CG  MET X 255     163.074 119.433 238.014  1.00  0.00           C
ATOM   4145  HG2 MET X 255     162.732 119.956 238.907  1.00  0.00           H
ATOM   4146  HG3 MET X 255     163.824 119.996 237.458  1.00  0.00           H
ATOM   4147  SD  MET X 255     161.579 119.017 236.994  1.00  0.00           S
ATOM   4148  CE  MET X 255     160.587 117.841 238.086  1.00  0.00           C
ATOM   4149  HE1 MET X 255     159.797 117.343 237.523  1.00  0.00           H
ATOM   4150  HE2 MET X 255     161.180 116.977 238.385  1.00  0.00           H
ATOM   4151  HE3 MET X 255     160.184 118.353 238.960  1.00  0.00           H
ATOM   4152  C   MET X 255     164.294 119.045 240.856  1.00  0.00           C
ATOM   4153  O   MET X 255     163.944 118.276 241.712  1.00  0.00           O
ATOM   4154  N   ASP X 256     164.056 120.339 241.127  1.00  0.00           N
ATOM   4155  H   ASP X 256     164.469 120.991 240.476  1.00  0.00           H
ATOM   4156  CA  ASP X 256     163.251 120.849 242.299  1.00  0.00           C
ATOM   4157  HA  ASP X 256     162.545 120.103 242.664  1.00  0.00           H
ATOM   4158  CB  ASP X 256     164.174 121.236 243.430  1.00  0.00           C
ATOM   4159  HB2 ASP X 256     164.511 120.293 243.861  1.00  0.00           H
ATOM   4160  HB3 ASP X 256     165.023 121.697 242.926  1.00  0.00           H
ATOM   4161  CG  ASP X 256     163.672 122.176 244.483  1.00  0.00           C
ATOM   4162  OD1 ASP X 256     162.491 122.200 244.844  1.00  0.00           O
ATOM   4163  OD2 ASP X 256     164.569 122.634 245.264  1.00  0.00           O
ATOM   4164  C   ASP X 256     162.358 122.023 241.893  1.00  0.00           C
ATOM   4165  O   ASP X 256     162.802 123.086 241.425  1.00  0.00           O
ATOM   4166  N   ILE X 257     160.982 121.916 242.218  1.00  0.00           N
ATOM   4167  H   ILE X 257     160.690 121.073 242.692  1.00  0.00           H
ATOM   4168  CA  ILE X 257     159.796 122.812 241.840  1.00  0.00           C
ATOM   4169  HA  ILE X 257     159.772 122.899 240.754  1.00  0.00           H
ATOM   4170  CB  ILE X 257     158.404 122.194 242.213  1.00  0.00           C
ATOM   4171  HB  ILE X 257     158.367 121.906 243.264  1.00  0.00           H
ATOM   4172  CG2 ILE X 257     157.200 123.040 241.795  1.00  0.00           C
ATOM   4173 HG21 ILE X 257     157.112 123.968 242.359  1.00  0.00           H
ATOM   4174 HG22 ILE X 257     156.248 122.529 241.944  1.00  0.00           H
ATOM   4175 HG23 ILE X 257     157.358 123.336 240.758  1.00  0.00           H
ATOM   4176  CG1 ILE X 257     158.248 120.867 241.400  1.00  0.00           C
ATOM   4177 HG12 ILE X 257     157.930 121.101 240.384  1.00  0.00           H
ATOM   4178 HG13 ILE X 257     159.231 120.398 241.350  1.00  0.00           H
ATOM   4179  CD1 ILE X 257     157.350 119.779 242.040  1.00  0.00           C
ATOM   4180 HD11 ILE X 257     156.893 119.115 241.306  1.00  0.00           H
ATOM   4181 HD12 ILE X 257     156.606 120.317 242.626  1.00  0.00           H
ATOM   4182 HD13 ILE X 257     157.855 119.241 242.842  1.00  0.00           H
ATOM   4183  C   ILE X 257     159.994 124.186 242.402  1.00  0.00           C
ATOM   4184  O   ILE X 257     159.269 125.117 241.969  1.00  0.00           O
ATOM   4185  N   ASN X 258     160.953 124.432 243.326  1.00  0.00           N
ATOM   4186  H   ASN X 258     161.338 123.621 243.789  1.00  0.00           H
ATOM   4187  CA  ASN X 258     161.146 125.749 243.887  1.00  0.00           C
ATOM   4188  HA  ASN X 258     160.254 126.371 243.807  1.00  0.00           H
ATOM   4189  CB  ASN X 258     161.462 125.493 245.407  1.00  0.00           C
ATOM   4190  HB2 ASN X 258     162.350 124.862 245.443  1.00  0.00           H
ATOM   4191  HB3 ASN X 258     161.696 126.434 245.905  1.00  0.00           H
ATOM   4192  CG  ASN X 258     160.336 124.721 246.174  1.00  0.00           C
ATOM   4193  OD1 ASN X 258     159.524 125.393 246.721  1.00  0.00           O
ATOM   4194  ND2 ASN X 258     160.486 123.418 246.441  1.00  0.00           N
ATOM   4195 HD21 ASN X 258     161.257 122.891 246.057  1.00  0.00           H
ATOM   4196 HD22 ASN X 258     159.837 122.963 247.066  1.00  0.00           H
ATOM   4197  C   ASN X 258     162.250 126.548 243.132  1.00  0.00           C
ATOM   4198  O   ASN X 258     162.339 127.749 243.330  1.00  0.00           O
ATOM   4199  N   ASN X 259     163.019 125.799 242.352  1.00  0.00           N
ATOM   4200  H   ASN X 259     162.789 124.820 242.255  1.00  0.00           H
ATOM   4201  CA  ASN X 259     164.338 126.251 241.987  1.00  0.00           C
ATOM   4202  HA  ASN X 259     164.323 127.341 241.976  1.00  0.00           H
ATOM   4203  CB  ASN X 259     165.403 125.731 242.981  1.00  0.00           C
ATOM   4204  HB2 ASN X 259     165.491 124.646 243.032  1.00  0.00           H
ATOM   4205  HB3 ASN X 259     166.385 126.123 242.713  1.00  0.00           H
ATOM   4206  CG  ASN X 259     165.176 126.355 244.350  1.00  0.00           C
ATOM   4207  OD1 ASN X 259     165.053 127.582 244.557  1.00  0.00           O
ATOM   4208  ND2 ASN X 259     165.052 125.560 245.331  1.00  0.00           N
ATOM   4209 HD21 ASN X 259     165.218 124.573 245.194  1.00  0.00           H
ATOM   4210 HD22 ASN X 259     164.972 125.925 246.269  1.00  0.00           H
ATOM   4211  C   ASN X 259     164.738 125.830 240.548  1.00  0.00           C
ATOM   4212  O   ASN X 259     165.626 124.977 240.400  1.00  0.00           O
ATOM   4213  N   PRO X 260     164.159 126.386 239.478  1.00  0.00           N
ATOM   4214  CD  PRO X 260     163.008 127.310 239.481  1.00  0.00           C
ATOM   4215  HD2 PRO X 260     163.277 128.221 240.014  1.00  0.00           H
ATOM   4216  HD3 PRO X 260     162.124 126.779 239.835  1.00  0.00           H
ATOM   4217  CG  PRO X 260     162.845 127.813 237.985  1.00  0.00           C
ATOM   4218  HG2 PRO X 260     163.511 128.671 237.892  1.00  0.00           H
ATOM   4219  HG3 PRO X 260     161.831 127.904 237.595  1.00  0.00           H
ATOM   4220  CB  PRO X 260     163.345 126.543 237.293  1.00  0.00           C
ATOM   4221  HB2 PRO X 260     163.725 126.734 236.290  1.00  0.00           H
ATOM   4222  HB3 PRO X 260     162.520 125.854 237.111  1.00  0.00           H
ATOM   4223  CA  PRO X 260     164.405 125.865 238.143  1.00  0.00           C
ATOM   4224  HA  PRO X 260     164.299 124.786 238.025  1.00  0.00           H
ATOM   4225  C   PRO X 260     165.815 126.194 237.791  1.00  0.00           C
ATOM   4226  O   PRO X 260     166.243 127.331 237.734  1.00  0.00           O
ATOM   4227  N   ARG X 261     166.593 125.167 237.399  1.00  0.00           N
ATOM   4228  H   ARG X 261     166.279 124.208 237.452  1.00  0.00           H
ATOM   4229  CA  ARG X 261     168.032 125.308 237.020  1.00  0.00           C
ATOM   4230  HA  ARG X 261     168.596 125.905 237.736  1.00  0.00           H
ATOM   4231  CB  ARG X 261     168.744 123.970 237.054  1.00  0.00           C
ATOM   4232  HB2 ARG X 261     168.310 123.365 236.258  1.00  0.00           H
ATOM   4233  HB3 ARG X 261     169.783 124.122 236.763  1.00  0.00           H
ATOM   4234  CG  ARG X 261     168.665 123.257 238.395  1.00  0.00           C
ATOM   4235  HG2 ARG X 261     169.386 123.689 239.090  1.00  0.00           H
ATOM   4236  HG3 ARG X 261     167.677 123.266 238.854  1.00  0.00           H
ATOM   4237  CD  ARG X 261     169.055 121.747 238.156  1.00  0.00           C
ATOM   4238  HD2 ARG X 261     169.914 121.742 237.485  1.00  0.00           H
ATOM   4239  HD3 ARG X 261     169.380 121.279 239.085  1.00  0.00           H
ATOM   4240  NE  ARG X 261     167.896 121.034 237.546  1.00  0.00           N
ATOM   4241  HE  ARG X 261     167.239 121.622 237.054  1.00  0.00           H
ATOM   4242  CZ  ARG X 261     167.725 119.779 237.342  1.00  0.00           C
ATOM   4243  NH1 ARG X 261     168.554 118.870 237.700  1.00  0.00           N
ATOM   4244 HH11 ARG X 261     169.357 119.154 238.242  1.00  0.00           H
ATOM   4245 HH12 ARG X 261     168.528 117.915 237.372  1.00  0.00           H
ATOM   4246  NH2 ARG X 261     166.683 119.374 236.706  1.00  0.00           N
ATOM   4247 HH21 ARG X 261     165.986 120.032 236.387  1.00  0.00           H
ATOM   4248 HH22 ARG X 261     166.577 118.378 236.573  1.00  0.00           H
ATOM   4249  C   ARG X 261     168.198 125.904 235.577  1.00  0.00           C
ATOM   4250  O   ARG X 261     169.198 126.518 235.300  1.00  0.00           O
ATOM   4251  N   ASP X 262     167.161 125.739 234.721  1.00  0.00           N
ATOM   4252  H   ASP X 262     166.405 125.094 234.902  1.00  0.00           H
ATOM   4253  CA  ASP X 262     167.062 126.457 233.441  1.00  0.00           C
ATOM   4254  HA  ASP X 262     167.516 127.441 233.555  1.00  0.00           H
ATOM   4255  CB  ASP X 262     167.979 125.736 232.341  1.00  0.00           C
ATOM   4256  HB2 ASP X 262     167.926 126.383 231.465  1.00  0.00           H
ATOM   4257  HB3 ASP X 262     168.995 125.657 232.728  1.00  0.00           H
ATOM   4258  CG  ASP X 262     167.539 124.246 232.009  1.00  0.00           C
ATOM   4259  OD1 ASP X 262     168.394 123.536 231.346  1.00  0.00           O
ATOM   4260  OD2 ASP X 262     166.438 123.796 232.490  1.00  0.00           O
ATOM   4261  C   ASP X 262     165.615 126.706 232.854  1.00  0.00           C
ATOM   4262  O   ASP X 262     164.628 126.380 233.517  1.00  0.00           O
ATOM   4263  N   PHE X 263     165.535 127.152 231.613  1.00  0.00           N
ATOM   4264  H   PHE X 263     166.363 127.295 231.053  1.00  0.00           H
ATOM   4265  CA  PHE X 263     164.273 127.308 230.927  1.00  0.00           C
ATOM   4266  HA  PHE X 263     163.821 128.109 231.513  1.00  0.00           H
ATOM   4267  CB  PHE X 263     164.681 127.917 229.515  1.00  0.00           C
ATOM   4268  HB2 PHE X 263     165.490 128.645 229.469  1.00  0.00           H
ATOM   4269  HB3 PHE X 263     164.883 127.027 228.919  1.00  0.00           H
ATOM   4270  CG  PHE X 263     163.574 128.751 228.894  1.00  0.00           C
ATOM   4271  CD1 PHE X 263     163.700 130.179 228.731  1.00  0.00           C
ATOM   4272  HD1 PHE X 263     164.582 130.669 229.115  1.00  0.00           H
ATOM   4273  CE1 PHE X 263     162.906 130.927 227.813  1.00  0.00           C
ATOM   4274  HE1 PHE X 263     163.070 131.982 227.651  1.00  0.00           H
ATOM   4275  CZ  PHE X 263     161.845 130.293 227.166  1.00  0.00           C
ATOM   4276  HZ  PHE X 263     161.164 130.839 226.529  1.00  0.00           H
ATOM   4277  CE2 PHE X 263     161.745 128.927 227.288  1.00  0.00           C
ATOM   4278  HE2 PHE X 263     161.045 128.325 226.727  1.00  0.00           H
ATOM   4279  CD2 PHE X 263     162.474 128.169 228.245  1.00  0.00           C
ATOM   4280  HD2 PHE X 263     162.287 127.108 228.320  1.00  0.00           H
ATOM   4281  C   PHE X 263     163.415 126.049 230.858  1.00  0.00           C
ATOM   4282  O   PHE X 263     162.201 126.186 230.924  1.00  0.00           O
ATOM   4283  N   ILE X 264     164.034 124.879 230.792  1.00  0.00           N
ATOM   4284  H   ILE X 264     165.038 124.829 230.884  1.00  0.00           H
ATOM   4285  CA  ILE X 264     163.390 123.559 230.549  1.00  0.00           C
ATOM   4286  HA  ILE X 264     162.566 123.669 229.845  1.00  0.00           H
ATOM   4287  CB  ILE X 264     164.379 122.457 229.963  1.00  0.00           C
ATOM   4288  HB  ILE X 264     165.228 122.283 230.625  1.00  0.00           H
ATOM   4289  CG2 ILE X 264     163.689 121.043 230.044  1.00  0.00           C
ATOM   4290 HG21 ILE X 264     162.643 121.253 229.819  1.00  0.00           H
ATOM   4291 HG22 ILE X 264     163.946 120.581 230.997  1.00  0.00           H
ATOM   4292 HG23 ILE X 264     164.082 120.455 229.214  1.00  0.00           H
ATOM   4293  CG1 ILE X 264     164.983 122.818 228.600  1.00  0.00           C
ATOM   4294 HG12 ILE X 264     165.377 123.826 228.729  1.00  0.00           H
ATOM   4295 HG13 ILE X 264     165.809 122.144 228.372  1.00  0.00           H
ATOM   4296  CD1 ILE X 264     164.090 122.709 227.365  1.00  0.00           C
ATOM   4297 HD11 ILE X 264     164.589 122.391 226.449  1.00  0.00           H
ATOM   4298 HD12 ILE X 264     163.715 123.688 227.066  1.00  0.00           H
ATOM   4299 HD13 ILE X 264     163.206 122.073 227.414  1.00  0.00           H
ATOM   4300  C   ILE X 264     162.845 123.115 231.832  1.00  0.00           C
ATOM   4301  O   ILE X 264     161.664 122.930 231.935  1.00  0.00           O
ATOM   4302  N   ASP X 265     163.680 123.187 232.873  1.00  0.00           N
ATOM   4303  H   ASP X 265     164.674 123.321 232.750  1.00  0.00           H
ATOM   4304  CA  ASP X 265     163.100 123.075 234.218  1.00  0.00           C
ATOM   4305  HA  ASP X 265     162.836 122.045 234.456  1.00  0.00           H
ATOM   4306  CB  ASP X 265     164.207 123.363 235.286  1.00  0.00           C
ATOM   4307  HB2 ASP X 265     164.938 124.082 234.917  1.00  0.00           H
ATOM   4308  HB3 ASP X 265     163.702 123.798 236.148  1.00  0.00           H
ATOM   4309  CG  ASP X 265     165.030 122.224 235.849  1.00  0.00           C
ATOM   4310  OD1 ASP X 265     164.995 121.069 235.430  1.00  0.00           O
ATOM   4311  OD2 ASP X 265     165.686 122.484 236.828  1.00  0.00           O
ATOM   4312  C   ASP X 265     161.911 123.969 234.426  1.00  0.00           C
ATOM   4313  O   ASP X 265     160.890 123.503 234.913  1.00  0.00           O
ATOM   4314  N   CYS X 266     162.033 125.243 234.046  1.00  0.00           N
ATOM   4315  H   CYS X 266     162.926 125.581 233.719  1.00  0.00           H
ATOM   4316  CA  CYS X 266     160.892 126.192 234.234  1.00  0.00           C
ATOM   4317  HA  CYS X 266     160.584 126.266 235.277  1.00  0.00           H
ATOM   4318  CB  CYS X 266     161.385 127.634 233.914  1.00  0.00           C
ATOM   4319  HB2 CYS X 266     162.352 127.823 234.382  1.00  0.00           H
ATOM   4320  HB3 CYS X 266     161.488 127.774 232.838  1.00  0.00           H
ATOM   4321  SG  CYS X 266     160.311 128.878 234.531  1.00  0.00           S
ATOM   4322  HG  CYS X 266     160.613 129.977 233.833  1.00  0.00           H
ATOM   4323  C   CYS X 266     159.627 125.872 233.434  1.00  0.00           C
ATOM   4324  O   CYS X 266     158.507 126.081 233.987  1.00  0.00           O
ATOM   4325  N   PHE X 267     159.746 125.318 232.237  1.00  0.00           N
ATOM   4326  H   PHE X 267     160.656 124.964 231.981  1.00  0.00           H
ATOM   4327  CA  PHE X 267     158.658 124.810 231.389  1.00  0.00           C
ATOM   4328  HA  PHE X 267     157.831 125.520 231.369  1.00  0.00           H
ATOM   4329  CB  PHE X 267     159.164 124.580 230.001  1.00  0.00           C
ATOM   4330  HB2 PHE X 267     159.752 125.472 229.784  1.00  0.00           H
ATOM   4331  HB3 PHE X 267     159.764 123.671 230.047  1.00  0.00           H
ATOM   4332  CG  PHE X 267     158.142 124.400 228.912  1.00  0.00           C
ATOM   4333  CD1 PHE X 267     157.792 125.534 228.182  1.00  0.00           C
ATOM   4334  HD1 PHE X 267     158.310 126.469 228.340  1.00  0.00           H
ATOM   4335  CE1 PHE X 267     156.822 125.452 227.145  1.00  0.00           C
ATOM   4336  HE1 PHE X 267     156.609 126.297 226.507  1.00  0.00           H
ATOM   4337  CZ  PHE X 267     156.207 124.304 226.783  1.00  0.00           C
ATOM   4338  HZ  PHE X 267     155.532 124.225 225.944  1.00  0.00           H
ATOM   4339  CE2 PHE X 267     156.569 123.103 227.518  1.00  0.00           C
ATOM   4340  HE2 PHE X 267     156.124 122.138 227.326  1.00  0.00           H
ATOM   4341  CD2 PHE X 267     157.546 123.138 228.573  1.00  0.00           C
ATOM   4342  HD2 PHE X 267     157.686 122.280 229.213  1.00  0.00           H
ATOM   4343  C   PHE X 267     158.110 123.551 232.009  1.00  0.00           C
ATOM   4344  O   PHE X 267     156.933 123.516 232.178  1.00  0.00           O
ATOM   4345  N   LEU X 268     158.905 122.561 232.483  1.00  0.00           N
ATOM   4346  H   LEU X 268     159.867 122.704 232.209  1.00  0.00           H
ATOM   4347  CA  LEU X 268     158.463 121.376 233.205  1.00  0.00           C
ATOM   4348  HA  LEU X 268     157.787 120.817 232.559  1.00  0.00           H
ATOM   4349  CB  LEU X 268     159.733 120.559 233.578  1.00  0.00           C
ATOM   4350  HB2 LEU X 268     160.502 121.284 233.843  1.00  0.00           H
ATOM   4351  HB3 LEU X 268     159.501 119.944 234.447  1.00  0.00           H
ATOM   4352  CG  LEU X 268     160.254 119.580 232.589  1.00  0.00           C
ATOM   4353  HG  LEU X 268     160.458 120.122 231.666  1.00  0.00           H
ATOM   4354  CD1 LEU X 268     161.593 119.019 233.168  1.00  0.00           C
ATOM   4355 HD11 LEU X 268     162.056 118.233 232.571  1.00  0.00           H
ATOM   4356 HD12 LEU X 268     161.433 118.617 234.168  1.00  0.00           H
ATOM   4357 HD13 LEU X 268     162.277 119.827 233.428  1.00  0.00           H
ATOM   4358  CD2 LEU X 268     159.325 118.385 232.335  1.00  0.00           C
ATOM   4359 HD21 LEU X 268     158.407 118.846 231.971  1.00  0.00           H
ATOM   4360 HD22 LEU X 268     159.821 117.660 231.689  1.00  0.00           H
ATOM   4361 HD23 LEU X 268     158.948 117.888 233.229  1.00  0.00           H
ATOM   4362  C   LEU X 268     157.736 121.755 234.472  1.00  0.00           C
ATOM   4363  O   LEU X 268     156.795 121.043 234.850  1.00  0.00           O
ATOM   4364  N   ILE X 269     158.180 122.833 235.262  1.00  0.00           N
ATOM   4365  H   ILE X 269     159.060 123.266 235.022  1.00  0.00           H
ATOM   4366  CA  ILE X 269     157.446 123.438 236.397  1.00  0.00           C
ATOM   4367  HA  ILE X 269     157.027 122.654 237.028  1.00  0.00           H
ATOM   4368  CB  ILE X 269     158.419 124.353 237.203  1.00  0.00           C
ATOM   4369  HB  ILE X 269     159.022 125.037 236.606  1.00  0.00           H
ATOM   4370  CG2 ILE X 269     157.864 125.317 238.309  1.00  0.00           C
ATOM   4371 HG21 ILE X 269     157.178 124.800 238.980  1.00  0.00           H
ATOM   4372 HG22 ILE X 269     157.382 126.139 237.780  1.00  0.00           H
ATOM   4373 HG23 ILE X 269     158.717 125.701 238.869  1.00  0.00           H
ATOM   4374  CG1 ILE X 269     159.373 123.294 237.794  1.00  0.00           C
ATOM   4375 HG12 ILE X 269     158.901 122.716 238.589  1.00  0.00           H
ATOM   4376 HG13 ILE X 269     159.684 122.511 237.103  1.00  0.00           H
ATOM   4377  CD1 ILE X 269     160.718 123.725 238.329  1.00  0.00           C
ATOM   4378 HD11 ILE X 269     161.397 124.052 237.542  1.00  0.00           H
ATOM   4379 HD12 ILE X 269     161.214 123.023 238.999  1.00  0.00           H
ATOM   4380 HD13 ILE X 269     160.566 124.565 239.007  1.00  0.00           H
ATOM   4381  C   ILE X 269     156.195 124.077 235.971  1.00  0.00           C
ATOM   4382  O   ILE X 269     155.214 123.969 236.720  1.00  0.00           O
ATOM   4383  N   LYS X 270     156.194 124.648 234.790  1.00  0.00           N
ATOM   4384  H   LYS X 270     157.118 124.825 234.422  1.00  0.00           H
ATOM   4385  CA  LYS X 270     155.037 125.305 234.179  1.00  0.00           C
ATOM   4386  HA  LYS X 270     154.419 125.942 234.811  1.00  0.00           H
ATOM   4387  CB  LYS X 270     155.350 126.229 232.988  1.00  0.00           C
ATOM   4388  HB2 LYS X 270     155.998 127.037 233.328  1.00  0.00           H
ATOM   4389  HB3 LYS X 270     155.798 125.623 232.200  1.00  0.00           H
ATOM   4390  CG  LYS X 270     154.111 126.929 232.270  1.00  0.00           C
ATOM   4391  HG2 LYS X 270     154.308 127.516 231.373  1.00  0.00           H
ATOM   4392  HG3 LYS X 270     153.497 126.187 231.761  1.00  0.00           H
ATOM   4393  CD  LYS X 270     153.210 127.789 233.189  1.00  0.00           C
ATOM   4394  HD2 LYS X 270     152.692 127.113 233.870  1.00  0.00           H
ATOM   4395  HD3 LYS X 270     153.874 128.493 233.689  1.00  0.00           H
ATOM   4396  CE  LYS X 270     152.255 128.544 232.269  1.00  0.00           C
ATOM   4397  HE2 LYS X 270     152.914 128.972 231.514  1.00  0.00           H
ATOM   4398  HE3 LYS X 270     151.707 127.727 231.799  1.00  0.00           H
ATOM   4399  NZ  LYS X 270     151.372 129.527 232.894  1.00  0.00           N
ATOM   4400  HZ1 LYS X 270     150.721 129.077 233.521  1.00  0.00           H
ATOM   4401  HZ2 LYS X 270     150.921 130.148 232.237  1.00  0.00           H
ATOM   4402  HZ3 LYS X 270     151.810 130.109 233.593  1.00  0.00           H
ATOM   4403  C   LYS X 270     153.922 124.284 233.833  1.00  0.00           C
ATOM   4404  O   LYS X 270     152.783 124.537 234.234  1.00  0.00           O
ATOM   4405  N   MET X 271     154.308 123.129 233.226  1.00  0.00           N
ATOM   4406  H   MET X 271     155.296 123.008 233.056  1.00  0.00           H
ATOM   4407  CA  MET X 271     153.503 121.961 233.034  1.00  0.00           C
ATOM   4408  HA  MET X 271     152.631 122.318 232.485  1.00  0.00           H
ATOM   4409  CB  MET X 271     154.015 120.907 232.065  1.00  0.00           C
ATOM   4410  HB2 MET X 271     154.873 120.372 232.474  1.00  0.00           H
ATOM   4411  HB3 MET X 271     153.143 120.269 231.923  1.00  0.00           H
ATOM   4412  CG  MET X 271     154.477 121.470 230.675  1.00  0.00           C
ATOM   4413  HG2 MET X 271     153.657 122.165 230.493  1.00  0.00           H
ATOM   4414  HG3 MET X 271     155.368 122.081 230.824  1.00  0.00           H
ATOM   4415  SD  MET X 271     154.618 120.238 229.314  1.00  0.00           S
ATOM   4416  CE  MET X 271     155.815 119.246 230.270  1.00  0.00           C
ATOM   4417  HE1 MET X 271     155.483 118.619 231.098  1.00  0.00           H
ATOM   4418  HE2 MET X 271     156.251 118.552 229.551  1.00  0.00           H
ATOM   4419  HE3 MET X 271     156.521 119.941 230.725  1.00  0.00           H
ATOM   4420  C   MET X 271     152.925 121.436 234.407  1.00  0.00           C
ATOM   4421  O   MET X 271     151.813 120.941 234.448  1.00  0.00           O
ATOM   4422  N   GLU X 272     153.704 121.444 235.562  1.00  0.00           N
ATOM   4423  H   GLU X 272     154.623 121.863 235.563  1.00  0.00           H
ATOM   4424  CA  GLU X 272     153.224 121.054 236.886  1.00  0.00           C
ATOM   4425  HA  GLU X 272     152.753 120.077 236.995  1.00  0.00           H
ATOM   4426  CB  GLU X 272     154.415 120.917 237.867  1.00  0.00           C
ATOM   4427  HB2 GLU X 272     155.002 120.064 237.526  1.00  0.00           H
ATOM   4428  HB3 GLU X 272     155.110 121.753 237.790  1.00  0.00           H
ATOM   4429  CG  GLU X 272     154.126 120.710 239.350  1.00  0.00           C
ATOM   4430  HG2 GLU X 272     155.112 120.545 239.783  1.00  0.00           H
ATOM   4431  HG3 GLU X 272     153.797 121.689 239.700  1.00  0.00           H
ATOM   4432  CD  GLU X 272     153.086 119.641 239.709  1.00  0.00           C
ATOM   4433  OE1 GLU X 272     152.447 119.815 240.792  1.00  0.00           O
ATOM   4434  OE2 GLU X 272     152.812 118.654 239.031  1.00  0.00           O
ATOM   4435  C   GLU X 272     152.105 122.048 237.399  1.00  0.00           C
ATOM   4436  O   GLU X 272     151.061 121.690 237.967  1.00  0.00           O
ATOM   4437  N   LYS X 273     152.330 123.367 237.228  1.00  0.00           N
ATOM   4438  H   LYS X 273     153.283 123.613 237.001  1.00  0.00           H
ATOM   4439  CA  LYS X 273     151.219 124.404 237.497  1.00  0.00           C
ATOM   4440  HA  LYS X 273     150.986 124.251 238.551  1.00  0.00           H
ATOM   4441  CB  LYS X 273     151.732 125.850 237.315  1.00  0.00           C
ATOM   4442  HB2 LYS X 273     152.302 125.908 236.387  1.00  0.00           H
ATOM   4443  HB3 LYS X 273     150.875 126.501 237.143  1.00  0.00           H
ATOM   4444  CG  LYS X 273     152.650 126.559 238.389  1.00  0.00           C
ATOM   4445  HG2 LYS X 273     153.647 126.130 238.298  1.00  0.00           H
ATOM   4446  HG3 LYS X 273     152.616 127.633 238.208  1.00  0.00           H
ATOM   4447  CD  LYS X 273     152.291 126.367 239.877  1.00  0.00           C
ATOM   4448  HD2 LYS X 273     152.243 125.315 240.157  1.00  0.00           H
ATOM   4449  HD3 LYS X 273     153.071 126.766 240.526  1.00  0.00           H
ATOM   4450  CE  LYS X 273     150.916 126.924 240.209  1.00  0.00           C
ATOM   4451  HE2 LYS X 273     150.246 126.561 239.429  1.00  0.00           H
ATOM   4452  HE3 LYS X 273     150.634 126.464 241.156  1.00  0.00           H
ATOM   4453  NZ  LYS X 273     150.918 128.411 240.264  1.00  0.00           N
ATOM   4454  HZ1 LYS X 273     149.959 128.711 240.370  1.00  0.00           H
ATOM   4455  HZ2 LYS X 273     151.328 128.926 239.498  1.00  0.00           H
ATOM   4456  HZ3 LYS X 273     151.481 128.688 241.056  1.00  0.00           H
ATOM   4457  C   LYS X 273     149.974 124.279 236.590  1.00  0.00           C
ATOM   4458  O   LYS X 273     148.893 124.769 237.013  1.00  0.00           O
ATOM   4459  N   GLU X 274     149.955 123.510 235.507  1.00  0.00           N
ATOM   4460  H   GLU X 274     150.869 123.184 235.225  1.00  0.00           H
ATOM   4461  CA  GLU X 274     148.827 123.299 234.600  1.00  0.00           C
ATOM   4462  HA  GLU X 274     148.066 124.073 234.699  1.00  0.00           H
ATOM   4463  CB  GLU X 274     149.420 123.338 233.211  1.00  0.00           C
ATOM   4464  HB2 GLU X 274     150.396 122.854 233.229  1.00  0.00           H
ATOM   4465  HB3 GLU X 274     148.726 122.809 232.558  1.00  0.00           H
ATOM   4466  CG  GLU X 274     149.682 124.719 232.629  1.00  0.00           C
ATOM   4467  HG2 GLU X 274     150.257 125.339 233.317  1.00  0.00           H
ATOM   4468  HG3 GLU X 274     150.229 124.551 231.702  1.00  0.00           H
ATOM   4469  CD  GLU X 274     148.392 125.542 232.372  1.00  0.00           C
ATOM   4470  OE1 GLU X 274     147.893 125.539 231.234  1.00  0.00           O
ATOM   4471  OE2 GLU X 274     147.963 126.244 233.314  1.00  0.00           O
ATOM   4472  C   GLU X 274     148.027 122.020 234.904  1.00  0.00           C
ATOM   4473  O   GLU X 274     147.046 121.789 234.177  1.00  0.00           O
ATOM   4474  N   LYS X 275     148.277 121.253 235.949  1.00  0.00           N
ATOM   4475  H   LYS X 275     149.115 121.385 236.498  1.00  0.00           H
ATOM   4476  CA  LYS X 275     147.698 119.939 236.186  1.00  0.00           C
ATOM   4477  HA  LYS X 275     147.824 119.416 235.238  1.00  0.00           H
ATOM   4478  CB  LYS X 275     148.494 119.287 237.252  1.00  0.00           C
ATOM   4479  HB2 LYS X 275     148.437 118.200 237.197  1.00  0.00           H
ATOM   4480  HB3 LYS X 275     149.552 119.443 237.045  1.00  0.00           H
ATOM   4481  CG  LYS X 275     148.196 119.708 238.684  1.00  0.00           C
ATOM   4482  HG2 LYS X 275     148.080 120.789 238.772  1.00  0.00           H
ATOM   4483  HG3 LYS X 275     147.222 119.320 238.981  1.00  0.00           H
ATOM   4484  CD  LYS X 275     149.382 119.199 239.530  1.00  0.00           C
ATOM   4485  HD2 LYS X 275     150.331 119.654 239.246  1.00  0.00           H
ATOM   4486  HD3 LYS X 275     149.212 119.529 240.555  1.00  0.00           H
ATOM   4487  CE  LYS X 275     149.605 117.663 239.659  1.00  0.00           C
ATOM   4488  HE2 LYS X 275     148.692 117.261 240.099  1.00  0.00           H
ATOM   4489  HE3 LYS X 275     149.901 117.228 238.704  1.00  0.00           H
ATOM   4490  NZ  LYS X 275     150.717 117.435 240.683  1.00  0.00           N
ATOM   4491  HZ1 LYS X 275     150.440 117.900 241.536  1.00  0.00           H
ATOM   4492  HZ2 LYS X 275     151.588 117.853 240.391  1.00  0.00           H
ATOM   4493  HZ3 LYS X 275     150.864 116.449 240.846  1.00  0.00           H
ATOM   4494  C   LYS X 275     146.241 119.946 236.501  1.00  0.00           C
ATOM   4495  O   LYS X 275     145.542 118.909 236.380  1.00  0.00           O
ATOM   4496  N   GLN X 276     145.695 121.053 236.864  1.00  0.00           N
ATOM   4497  H   GLN X 276     146.286 121.868 236.949  1.00  0.00           H
ATOM   4498  CA  GLN X 276     144.237 121.261 237.138  1.00  0.00           C
ATOM   4499  HA  GLN X 276     143.794 120.299 237.395  1.00  0.00           H
ATOM   4500  CB  GLN X 276     143.984 122.032 238.524  1.00  0.00           C
ATOM   4501  HB2 GLN X 276     142.955 121.847 238.832  1.00  0.00           H
ATOM   4502  HB3 GLN X 276     144.638 121.602 239.283  1.00  0.00           H
ATOM   4503  CG  GLN X 276     144.178 123.559 238.482  1.00  0.00           C
ATOM   4504  HG2 GLN X 276     143.375 124.041 237.923  1.00  0.00           H
ATOM   4505  HG3 GLN X 276     144.150 123.892 239.519  1.00  0.00           H
ATOM   4506  CD  GLN X 276     145.503 124.076 237.922  1.00  0.00           C
ATOM   4507  OE1 GLN X 276     145.499 124.672 236.809  1.00  0.00           O
ATOM   4508  NE2 GLN X 276     146.563 123.856 238.626  1.00  0.00           N
ATOM   4509 HE21 GLN X 276     147.432 124.295 238.356  1.00  0.00           H
ATOM   4510 HE22 GLN X 276     146.633 123.302 239.467  1.00  0.00           H
ATOM   4511  C   GLN X 276     143.469 121.969 235.997  1.00  0.00           C
ATOM   4512  O   GLN X 276     142.312 122.341 236.183  1.00  0.00           O
ATOM   4513  N   ASN X 277     144.161 122.333 234.937  1.00  0.00           N
ATOM   4514  H   ASN X 277     145.150 122.143 234.867  1.00  0.00           H
ATOM   4515  CA  ASN X 277     143.544 122.921 233.727  1.00  0.00           C
ATOM   4516  HA  ASN X 277     142.891 123.730 234.053  1.00  0.00           H
ATOM   4517  CB  ASN X 277     144.753 123.565 232.883  1.00  0.00           C
ATOM   4518  HB2 ASN X 277     145.345 124.255 233.484  1.00  0.00           H
ATOM   4519  HB3 ASN X 277     145.419 122.813 232.459  1.00  0.00           H
ATOM   4520  CG  ASN X 277     144.251 124.483 231.702  1.00  0.00           C
ATOM   4521  OD1 ASN X 277     143.097 124.480 231.333  1.00  0.00           O
ATOM   4522  ND2 ASN X 277     145.117 125.323 231.166  1.00  0.00           N
ATOM   4523 HD21 ASN X 277     146.110 125.230 231.326  1.00  0.00           H
ATOM   4524 HD22 ASN X 277     144.757 125.795 230.349  1.00  0.00           H
ATOM   4525  C   ASN X 277     142.786 121.830 232.999  1.00  0.00           C
ATOM   4526  O   ASN X 277     143.489 120.811 232.746  1.00  0.00           O
ATOM   4527  N   GLN X 278     141.560 121.997 232.554  1.00  0.00           N
ATOM   4528  H   GLN X 278     141.229 122.894 232.881  1.00  0.00           H
ATOM   4529  CA  GLN X 278     140.776 121.161 231.615  1.00  0.00           C
ATOM   4530  HA  GLN X 278     140.628 120.111 231.868  1.00  0.00           H
ATOM   4531  CB  GLN X 278     139.447 121.842 231.295  1.00  0.00           C
ATOM   4532  HB2 GLN X 278     138.895 121.981 232.224  1.00  0.00           H
ATOM   4533  HB3 GLN X 278     139.627 122.825 230.861  1.00  0.00           H
ATOM   4534  CG  GLN X 278     138.574 120.989 230.379  1.00  0.00           C
ATOM   4535  HG2 GLN X 278     137.632 121.533 230.301  1.00  0.00           H
ATOM   4536  HG3 GLN X 278     139.027 120.816 229.403  1.00  0.00           H
ATOM   4537  CD  GLN X 278     138.168 119.631 231.024  1.00  0.00           C
ATOM   4538  OE1 GLN X 278     138.054 119.498 232.257  1.00  0.00           O
ATOM   4539  NE2 GLN X 278     137.966 118.573 230.258  1.00  0.00           N
ATOM   4540 HE21 GLN X 278     137.405 117.839 230.666  1.00  0.00           H
ATOM   4541 HE22 GLN X 278     138.237 118.655 229.289  1.00  0.00           H
ATOM   4542  C   GLN X 278     141.529 120.971 230.246  1.00  0.00           C
ATOM   4543  O   GLN X 278     141.562 119.882 229.648  1.00  0.00           O
ATOM   4544  N   GLN X 279     142.199 122.002 229.842  1.00  0.00           N
ATOM   4545  H   GLN X 279     142.371 122.823 230.404  1.00  0.00           H
ATOM   4546  CA  GLN X 279     142.677 122.357 228.512  1.00  0.00           C
ATOM   4547  HA  GLN X 279     143.138 121.444 228.136  1.00  0.00           H
ATOM   4548  CB  GLN X 279     141.537 122.794 227.586  1.00  0.00           C
ATOM   4549  HB2 GLN X 279     142.151 123.014 226.713  1.00  0.00           H
ATOM   4550  HB3 GLN X 279     140.847 121.969 227.413  1.00  0.00           H
ATOM   4551  CG  GLN X 279     140.767 124.078 227.903  1.00  0.00           C
ATOM   4552  HG2 GLN X 279     141.117 124.470 228.858  1.00  0.00           H
ATOM   4553  HG3 GLN X 279     141.051 124.838 227.174  1.00  0.00           H
ATOM   4554  CD  GLN X 279     139.214 123.931 228.087  1.00  0.00           C
ATOM   4555  OE1 GLN X 279     138.670 123.028 227.470  1.00  0.00           O
ATOM   4556  NE2 GLN X 279     138.533 124.831 228.797  1.00  0.00           N
ATOM   4557 HE21 GLN X 279     137.523 124.862 228.808  1.00  0.00           H
ATOM   4558 HE22 GLN X 279     139.091 125.532 229.262  1.00  0.00           H
ATOM   4559  C   GLN X 279     143.921 123.331 228.501  1.00  0.00           C
ATOM   4560  O   GLN X 279     143.873 124.547 228.221  1.00  0.00           O
ATOM   4561  N   SER X 280     145.064 122.724 228.777  1.00  0.00           N
ATOM   4562  H   SER X 280     144.992 121.761 229.072  1.00  0.00           H
ATOM   4563  CA  SER X 280     146.345 123.394 228.659  1.00  0.00           C
ATOM   4564  HA  SER X 280     146.121 124.430 228.915  1.00  0.00           H
ATOM   4565  CB  SER X 280     147.394 122.850 229.645  1.00  0.00           C
ATOM   4566  HB2 SER X 280     146.932 122.913 230.630  1.00  0.00           H
ATOM   4567  HB3 SER X 280     147.659 121.824 229.391  1.00  0.00           H
ATOM   4568  OG  SER X 280     148.552 123.693 229.660  1.00  0.00           O
ATOM   4569  HG  SER X 280     148.358 124.438 230.234  1.00  0.00           H
ATOM   4570  C   SER X 280     146.943 123.601 227.209  1.00  0.00           C
ATOM   4571  O   SER X 280     146.996 122.700 226.462  1.00  0.00           O
ATOM   4572  N   GLU X 281     147.696 124.712 226.979  1.00  0.00           N
ATOM   4573  H   GLU X 281     147.642 125.344 227.765  1.00  0.00           H
ATOM   4574  CA  GLU X 281     148.457 124.957 225.787  1.00  0.00           C
ATOM   4575  HA  GLU X 281     148.014 124.395 224.965  1.00  0.00           H
ATOM   4576  CB  GLU X 281     148.429 126.430 225.352  1.00  0.00           C
ATOM   4577  HB2 GLU X 281     148.915 126.985 226.154  1.00  0.00           H
ATOM   4578  HB3 GLU X 281     148.938 126.538 224.394  1.00  0.00           H
ATOM   4579  CG  GLU X 281     147.110 127.090 225.146  1.00  0.00           C
ATOM   4580  HG2 GLU X 281     146.622 127.196 226.114  1.00  0.00           H
ATOM   4581  HG3 GLU X 281     147.182 128.051 224.636  1.00  0.00           H
ATOM   4582  CD  GLU X 281     146.223 126.207 224.291  1.00  0.00           C
ATOM   4583  OE1 GLU X 281     145.172 125.723 224.818  1.00  0.00           O
ATOM   4584  OE2 GLU X 281     146.553 125.963 223.128  1.00  0.00           O
ATOM   4585  C   GLU X 281     149.875 124.295 225.877  1.00  0.00           C
ATOM   4586  O   GLU X 281     150.617 124.120 224.906  1.00  0.00           O
ATOM   4587  N   PHE X 282     150.244 123.943 227.149  1.00  0.00           N
ATOM   4588  H   PHE X 282     149.545 123.986 227.877  1.00  0.00           H
ATOM   4589  CA  PHE X 282     151.604 123.406 227.484  1.00  0.00           C
ATOM   4590  HA  PHE X 282     152.274 123.917 226.793  1.00  0.00           H
ATOM   4591  CB  PHE X 282     152.079 123.753 228.867  1.00  0.00           C
ATOM   4592  HB2 PHE X 282     151.513 123.299 229.681  1.00  0.00           H
ATOM   4593  HB3 PHE X 282     153.083 123.400 229.103  1.00  0.00           H
ATOM   4594  CG  PHE X 282     152.173 125.362 229.071  1.00  0.00           C
ATOM   4595  CD1 PHE X 282     153.469 125.957 228.718  1.00  0.00           C
ATOM   4596  HD1 PHE X 282     154.318 125.398 228.354  1.00  0.00           H
ATOM   4597  CE1 PHE X 282     153.563 127.352 228.770  1.00  0.00           C
ATOM   4598  HE1 PHE X 282     154.529 127.806 228.606  1.00  0.00           H
ATOM   4599  CZ  PHE X 282     152.464 128.215 229.087  1.00  0.00           C
ATOM   4600  HZ  PHE X 282     152.566 129.285 229.193  1.00  0.00           H
ATOM   4601  CE2 PHE X 282     151.257 127.633 229.307  1.00  0.00           C
ATOM   4602  HE2 PHE X 282     150.446 128.305 229.547  1.00  0.00           H
ATOM   4603  CD2 PHE X 282     151.142 126.237 229.369  1.00  0.00           C
ATOM   4604  HD2 PHE X 282     150.130 125.887 229.507  1.00  0.00           H
ATOM   4605  C   PHE X 282     151.677 121.947 227.206  1.00  0.00           C
ATOM   4606  O   PHE X 282     150.921 121.077 227.575  1.00  0.00           O
ATOM   4607  N   THR X 283     152.654 121.572 226.387  1.00  0.00           N
ATOM   4608  H   THR X 283     153.346 122.272 226.162  1.00  0.00           H
ATOM   4609  CA  THR X 283     153.020 120.288 225.842  1.00  0.00           C
ATOM   4610  HA  THR X 283     153.038 119.636 226.716  1.00  0.00           H
ATOM   4611  CB  THR X 283     152.046 119.761 224.757  1.00  0.00           C
ATOM   4612  HB  THR X 283     151.000 119.638 225.035  1.00  0.00           H
ATOM   4613  CG2 THR X 283     152.002 120.791 223.610  1.00  0.00           C
ATOM   4614 HG21 THR X 283     152.203 121.840 223.829  1.00  0.00           H
ATOM   4615 HG22 THR X 283     150.951 120.834 223.323  1.00  0.00           H
ATOM   4616 HG23 THR X 283     152.604 120.465 222.762  1.00  0.00           H
ATOM   4617  OG1 THR X 283     152.429 118.550 224.197  1.00  0.00           O
ATOM   4618  HG1 THR X 283     152.036 117.793 224.638  1.00  0.00           H
ATOM   4619  C   THR X 283     154.446 120.510 225.288  1.00  0.00           C
ATOM   4620  O   THR X 283     154.849 121.625 225.044  1.00  0.00           O
ATOM   4621  N   ILE X 284     155.244 119.425 225.218  1.00  0.00           N
ATOM   4622  H   ILE X 284     154.725 118.559 225.187  1.00  0.00           H
ATOM   4623  CA  ILE X 284     156.608 119.503 224.824  1.00  0.00           C
ATOM   4624  HA  ILE X 284     156.994 120.439 225.226  1.00  0.00           H
ATOM   4625  CB  ILE X 284     157.340 118.210 225.365  1.00  0.00           C
ATOM   4626  HB  ILE X 284     156.851 117.340 224.929  1.00  0.00           H
ATOM   4627  CG2 ILE X 284     158.834 118.065 224.989  1.00  0.00           C
ATOM   4628 HG21 ILE X 284     159.263 119.066 225.020  1.00  0.00           H
ATOM   4629 HG22 ILE X 284     158.928 117.779 223.942  1.00  0.00           H
ATOM   4630 HG23 ILE X 284     159.368 117.279 225.523  1.00  0.00           H
ATOM   4631  CG1 ILE X 284     157.298 118.217 226.930  1.00  0.00           C
ATOM   4632 HG12 ILE X 284     156.250 118.325 227.212  1.00  0.00           H
ATOM   4633 HG13 ILE X 284     157.629 117.288 227.394  1.00  0.00           H
ATOM   4634  CD1 ILE X 284     158.094 119.427 227.546  1.00  0.00           C
ATOM   4635 HD11 ILE X 284     159.098 119.539 227.136  1.00  0.00           H
ATOM   4636 HD12 ILE X 284     158.143 119.153 228.599  1.00  0.00           H
ATOM   4637 HD13 ILE X 284     157.406 120.258 227.389  1.00  0.00           H
ATOM   4638  C   ILE X 284     156.872 119.550 223.291  1.00  0.00           C
ATOM   4639  O   ILE X 284     157.910 120.084 222.827  1.00  0.00           O
ATOM   4640  N   GLU X 285     155.850 119.193 222.485  1.00  0.00           N
ATOM   4641  H   GLU X 285     155.060 118.652 222.804  1.00  0.00           H
ATOM   4642  CA  GLU X 285     155.849 119.426 221.068  1.00  0.00           C
ATOM   4643  HA  GLU X 285     156.746 118.948 220.674  1.00  0.00           H
ATOM   4644  CB  GLU X 285     154.608 118.817 220.439  1.00  0.00           C
ATOM   4645  HB2 GLU X 285     154.439 117.815 220.834  1.00  0.00           H
ATOM   4646  HB3 GLU X 285     153.722 119.409 220.669  1.00  0.00           H
ATOM   4647  CG  GLU X 285     154.708 118.720 218.875  1.00  0.00           C
ATOM   4648  HG2 GLU X 285     153.725 118.444 218.493  1.00  0.00           H
ATOM   4649  HG3 GLU X 285     155.008 119.699 218.502  1.00  0.00           H
ATOM   4650  CD  GLU X 285     155.657 117.770 218.264  1.00  0.00           C
ATOM   4651  OE1 GLU X 285     156.103 118.053 217.120  1.00  0.00           O
ATOM   4652  OE2 GLU X 285     155.923 116.703 218.866  1.00  0.00           O
ATOM   4653  C   GLU X 285     155.962 120.945 220.739  1.00  0.00           C
ATOM   4654  O   GLU X 285     156.767 121.296 219.905  1.00  0.00           O
ATOM   4655  N   ASN X 286     155.231 121.801 221.504  1.00  0.00           N
ATOM   4656  H   ASN X 286     154.680 121.351 222.221  1.00  0.00           H
ATOM   4657  CA  ASN X 286     155.318 123.348 221.398  1.00  0.00           C
ATOM   4658  HA  ASN X 286     155.165 123.604 220.350  1.00  0.00           H
ATOM   4659  CB  ASN X 286     154.157 123.931 222.247  1.00  0.00           C
ATOM   4660  HB2 ASN X 286     153.260 123.315 222.187  1.00  0.00           H
ATOM   4661  HB3 ASN X 286     154.451 123.997 223.295  1.00  0.00           H
ATOM   4662  CG  ASN X 286     153.739 125.354 221.794  1.00  0.00           C
ATOM   4663  OD1 ASN X 286     154.613 126.090 221.532  1.00  0.00           O
ATOM   4664  ND2 ASN X 286     152.494 125.745 221.837  1.00  0.00           N
ATOM   4665 HD21 ASN X 286     151.759 125.178 222.236  1.00  0.00           H
ATOM   4666 HD22 ASN X 286     152.244 126.713 221.688  1.00  0.00           H
ATOM   4667  C   ASN X 286     156.671 123.921 221.890  1.00  0.00           C
ATOM   4668  O   ASN X 286     157.166 124.940 221.368  1.00  0.00           O
ATOM   4669  N   LEU X 287     157.383 123.165 222.785  1.00  0.00           N
ATOM   4670  H   LEU X 287     156.994 122.294 223.115  1.00  0.00           H
ATOM   4671  CA  LEU X 287     158.598 123.612 223.364  1.00  0.00           C
ATOM   4672  HA  LEU X 287     158.456 124.636 223.710  1.00  0.00           H
ATOM   4673  CB  LEU X 287     158.939 122.694 224.629  1.00  0.00           C
ATOM   4674  HB2 LEU X 287     158.160 122.812 225.382  1.00  0.00           H
ATOM   4675  HB3 LEU X 287     158.955 121.646 224.328  1.00  0.00           H
ATOM   4676  CG  LEU X 287     160.308 122.942 225.293  1.00  0.00           C
ATOM   4677  HG  LEU X 287     161.111 122.722 224.589  1.00  0.00           H
ATOM   4678  CD1 LEU X 287     160.382 124.409 225.707  1.00  0.00           C
ATOM   4679 HD11 LEU X 287     159.709 124.714 226.508  1.00  0.00           H
ATOM   4680 HD12 LEU X 287     160.413 125.122 224.882  1.00  0.00           H
ATOM   4681 HD13 LEU X 287     161.382 124.581 226.106  1.00  0.00           H
ATOM   4682  CD2 LEU X 287     160.546 122.188 226.598  1.00  0.00           C
ATOM   4683 HD21 LEU X 287     159.555 121.929 226.969  1.00  0.00           H
ATOM   4684 HD22 LEU X 287     161.035 121.226 226.445  1.00  0.00           H
ATOM   4685 HD23 LEU X 287     160.995 122.754 227.415  1.00  0.00           H
ATOM   4686  C   LEU X 287     159.718 123.592 222.354  1.00  0.00           C
ATOM   4687  O   LEU X 287     160.575 124.423 222.366  1.00  0.00           O
ATOM   4688  N   VAL X 288     159.647 122.676 221.420  1.00  0.00           N
ATOM   4689  H   VAL X 288     158.935 121.963 221.469  1.00  0.00           H
ATOM   4690  CA  VAL X 288     160.545 122.546 220.260  1.00  0.00           C
ATOM   4691  HA  VAL X 288     161.574 122.417 220.594  1.00  0.00           H
ATOM   4692  CB  VAL X 288     160.282 121.308 219.326  1.00  0.00           C
ATOM   4693  HB  VAL X 288     159.273 121.346 218.915  1.00  0.00           H
ATOM   4694  CG1 VAL X 288     161.196 121.311 218.119  1.00  0.00           C
ATOM   4695 HG11 VAL X 288     161.223 122.237 217.545  1.00  0.00           H
ATOM   4696 HG12 VAL X 288     162.192 121.123 218.521  1.00  0.00           H
ATOM   4697 HG13 VAL X 288     160.963 120.523 217.402  1.00  0.00           H
ATOM   4698  CG2 VAL X 288     160.376 119.991 220.063  1.00  0.00           C
ATOM   4699 HG21 VAL X 288     160.102 119.099 219.499  1.00  0.00           H
ATOM   4700 HG22 VAL X 288     159.685 119.993 220.906  1.00  0.00           H
ATOM   4701 HG23 VAL X 288     161.400 119.928 220.432  1.00  0.00           H
ATOM   4702  C   VAL X 288     160.540 123.861 219.561  1.00  0.00           C
ATOM   4703  O   VAL X 288     161.592 124.542 219.557  1.00  0.00           O
ATOM   4704  N   ILE X 289     159.344 124.285 219.035  1.00  0.00           N
ATOM   4705  H   ILE X 289     158.502 123.807 219.321  1.00  0.00           H
ATOM   4706  CA  ILE X 289     159.183 125.568 218.328  1.00  0.00           C
ATOM   4707  HA  ILE X 289     159.974 125.558 217.578  1.00  0.00           H
ATOM   4708  CB  ILE X 289     157.898 125.559 217.442  1.00  0.00           C
ATOM   4709  HB  ILE X 289     157.013 125.552 218.079  1.00  0.00           H
ATOM   4710  CG2 ILE X 289     157.944 126.790 216.503  1.00  0.00           C
ATOM   4711 HG21 ILE X 289     158.788 126.706 215.818  1.00  0.00           H
ATOM   4712 HG22 ILE X 289     157.994 127.794 216.925  1.00  0.00           H
ATOM   4713 HG23 ILE X 289     157.109 126.913 215.813  1.00  0.00           H
ATOM   4714  CG1 ILE X 289     157.825 124.245 216.547  1.00  0.00           C
ATOM   4715 HG12 ILE X 289     157.660 123.311 217.085  1.00  0.00           H
ATOM   4716 HG13 ILE X 289     156.908 124.276 215.958  1.00  0.00           H
ATOM   4717  CD1 ILE X 289     158.958 124.081 215.555  1.00  0.00           C
ATOM   4718 HD11 ILE X 289     158.877 123.058 215.189  1.00  0.00           H
ATOM   4719 HD12 ILE X 289     159.911 124.114 216.083  1.00  0.00           H
ATOM   4720 HD13 ILE X 289     158.853 124.745 214.698  1.00  0.00           H
ATOM   4721  C   ILE X 289     159.404 126.846 219.228  1.00  0.00           C
ATOM   4722  O   ILE X 289     159.920 127.845 218.731  1.00  0.00           O
ATOM   4723  N   THR X 290     158.929 126.821 220.520  1.00  0.00           N
ATOM   4724  H   THR X 290     158.417 126.003 220.816  1.00  0.00           H
ATOM   4725  CA  THR X 290     159.030 127.975 221.437  1.00  0.00           C
ATOM   4726  HA  THR X 290     158.631 128.909 221.043  1.00  0.00           H
ATOM   4727  CB  THR X 290     158.480 127.623 222.858  1.00  0.00           C
ATOM   4728  HB  THR X 290     158.964 126.707 223.195  1.00  0.00           H
ATOM   4729  CG2 THR X 290     158.686 128.800 223.814  1.00  0.00           C
ATOM   4730 HG21 THR X 290     159.734 128.875 224.103  1.00  0.00           H
ATOM   4731 HG22 THR X 290     158.101 128.774 224.733  1.00  0.00           H
ATOM   4732 HG23 THR X 290     158.327 129.658 223.245  1.00  0.00           H
ATOM   4733  OG1 THR X 290     157.129 127.354 222.859  1.00  0.00           O
ATOM   4734  HG1 THR X 290     156.888 126.681 222.217  1.00  0.00           H
ATOM   4735  C   THR X 290     160.542 128.284 221.703  1.00  0.00           C
ATOM   4736  O   THR X 290     160.886 129.435 221.563  1.00  0.00           O
ATOM   4737  N   ALA X 291     161.397 127.244 221.948  1.00  0.00           N
ATOM   4738  H   ALA X 291     160.988 126.324 222.037  1.00  0.00           H
ATOM   4739  CA  ALA X 291     162.781 127.553 221.996  1.00  0.00           C
ATOM   4740  HA  ALA X 291     162.875 128.408 222.665  1.00  0.00           H
ATOM   4741  CB  ALA X 291     163.395 126.255 222.521  1.00  0.00           C
ATOM   4742  HB1 ALA X 291     164.444 126.532 222.623  1.00  0.00           H
ATOM   4743  HB2 ALA X 291     163.159 125.410 221.875  1.00  0.00           H
ATOM   4744  HB3 ALA X 291     162.839 126.076 223.441  1.00  0.00           H
ATOM   4745  C   ALA X 291     163.354 127.973 220.640  1.00  0.00           C
ATOM   4746  O   ALA X 291     164.185 128.856 220.557  1.00  0.00           O
ATOM   4747  N   ALA X 292     162.844 127.306 219.602  1.00  0.00           N
ATOM   4748  H   ALA X 292     162.117 126.611 219.693  1.00  0.00           H
ATOM   4749  CA  ALA X 292     163.467 127.433 218.160  1.00  0.00           C
ATOM   4750  HA  ALA X 292     164.544 127.280 218.234  1.00  0.00           H
ATOM   4751  CB  ALA X 292     162.872 126.380 217.252  1.00  0.00           C
ATOM   4752  HB1 ALA X 292     163.313 126.442 216.257  1.00  0.00           H
ATOM   4753  HB2 ALA X 292     161.800 126.560 217.170  1.00  0.00           H
ATOM   4754  HB3 ALA X 292     163.142 125.389 217.619  1.00  0.00           H
ATOM   4755  C   ALA X 292     163.309 128.854 217.728  1.00  0.00           C
ATOM   4756  O   ALA X 292     164.297 129.470 217.211  1.00  0.00           O
ATOM   4757  N   ASP X 293     162.154 129.488 217.981  1.00  0.00           N
ATOM   4758  H   ASP X 293     161.438 128.951 218.449  1.00  0.00           H
ATOM   4759  CA  ASP X 293     161.872 130.844 217.646  1.00  0.00           C
ATOM   4760  HA  ASP X 293     162.107 131.113 216.616  1.00  0.00           H
ATOM   4761  CB  ASP X 293     160.383 131.169 217.817  1.00  0.00           C
ATOM   4762  HB2 ASP X 293     160.068 130.941 218.835  1.00  0.00           H
ATOM   4763  HB3 ASP X 293     160.269 132.249 217.728  1.00  0.00           H
ATOM   4764  CG  ASP X 293     159.514 130.605 216.721  1.00  0.00           C
ATOM   4765  OD1 ASP X 293     158.306 130.626 216.939  1.00  0.00           O
ATOM   4766  OD2 ASP X 293     159.942 130.381 215.529  1.00  0.00           O
ATOM   4767  C   ASP X 293     162.695 131.911 218.457  1.00  0.00           C
ATOM   4768  O   ASP X 293     163.097 132.922 217.882  1.00  0.00           O
ATOM   4769  N   LEU X 294     163.087 131.600 219.669  1.00  0.00           N
ATOM   4770  H   LEU X 294     162.797 130.715 220.061  1.00  0.00           H
ATOM   4771  CA  LEU X 294     164.041 132.505 220.451  1.00  0.00           C
ATOM   4772  HA  LEU X 294     163.801 133.541 220.209  1.00  0.00           H
ATOM   4773  CB  LEU X 294     163.787 132.201 221.944  1.00  0.00           C
ATOM   4774  HB2 LEU X 294     164.086 131.182 222.188  1.00  0.00           H
ATOM   4775  HB3 LEU X 294     164.412 132.882 222.521  1.00  0.00           H
ATOM   4776  CG  LEU X 294     162.361 132.504 222.471  1.00  0.00           C
ATOM   4777  HG  LEU X 294     161.616 131.957 221.893  1.00  0.00           H
ATOM   4778  CD1 LEU X 294     162.180 131.951 223.902  1.00  0.00           C
ATOM   4779 HD11 LEU X 294     161.197 131.488 223.994  1.00  0.00           H
ATOM   4780 HD12 LEU X 294     162.391 132.664 224.699  1.00  0.00           H
ATOM   4781 HD13 LEU X 294     162.758 131.045 224.084  1.00  0.00           H
ATOM   4782  CD2 LEU X 294     162.092 133.987 222.531  1.00  0.00           C
ATOM   4783 HD21 LEU X 294     161.058 134.141 222.838  1.00  0.00           H
ATOM   4784 HD22 LEU X 294     162.820 134.454 223.195  1.00  0.00           H
ATOM   4785 HD23 LEU X 294     162.137 134.529 221.587  1.00  0.00           H
ATOM   4786  C   LEU X 294     165.506 132.305 219.986  1.00  0.00           C
ATOM   4787  O   LEU X 294     166.301 133.197 219.961  1.00  0.00           O
ATOM   4788  N   LEU X 295     165.851 131.046 219.712  1.00  0.00           N
ATOM   4789  H   LEU X 295     165.155 130.314 219.716  1.00  0.00           H
ATOM   4790  CA  LEU X 295     167.190 130.647 219.440  1.00  0.00           C
ATOM   4791  HA  LEU X 295     167.885 131.029 220.188  1.00  0.00           H
ATOM   4792  CB  LEU X 295     167.252 129.091 219.438  1.00  0.00           C
ATOM   4793  HB2 LEU X 295     166.302 128.723 219.051  1.00  0.00           H
ATOM   4794  HB3 LEU X 295     167.997 128.660 218.770  1.00  0.00           H
ATOM   4795  CG  LEU X 295     167.511 128.522 220.880  1.00  0.00           C
ATOM   4796  HG  LEU X 295     166.966 129.058 221.657  1.00  0.00           H
ATOM   4797  CD1 LEU X 295     167.034 127.013 221.066  1.00  0.00           C
ATOM   4798 HD11 LEU X 295     165.993 126.860 220.784  1.00  0.00           H
ATOM   4799 HD12 LEU X 295     167.253 126.729 222.095  1.00  0.00           H
ATOM   4800 HD13 LEU X 295     167.703 126.458 220.407  1.00  0.00           H
ATOM   4801  CD2 LEU X 295     169.026 128.462 221.305  1.00  0.00           C
ATOM   4802 HD21 LEU X 295     169.178 127.742 222.110  1.00  0.00           H
ATOM   4803 HD22 LEU X 295     169.536 128.192 220.380  1.00  0.00           H
ATOM   4804 HD23 LEU X 295     169.370 129.439 221.645  1.00  0.00           H
ATOM   4805  C   LEU X 295     167.681 131.193 218.066  1.00  0.00           C
ATOM   4806  O   LEU X 295     168.614 131.927 217.958  1.00  0.00           O
ATOM   4807  N   GLY X 296     166.796 130.879 217.037  1.00  0.00           N
ATOM   4808  H   GLY X 296     165.914 130.468 217.308  1.00  0.00           H
ATOM   4809  CA  GLY X 296     166.907 131.543 215.700  1.00  0.00           C
ATOM   4810  HA2 GLY X 296     167.857 131.220 215.274  1.00  0.00           H
ATOM   4811  HA3 GLY X 296     166.065 131.226 215.084  1.00  0.00           H
ATOM   4812  C   GLY X 296     166.819 133.087 215.719  1.00  0.00           C
ATOM   4813  O   GLY X 296     167.499 133.675 214.867  1.00  0.00           O
ATOM   4814  N   ALA X 297     166.096 133.675 216.679  1.00  0.00           N
ATOM   4815  H   ALA X 297     165.445 133.119 217.216  1.00  0.00           H
ATOM   4816  CA  ALA X 297     166.156 135.191 216.730  1.00  0.00           C
ATOM   4817  HA  ALA X 297     166.183 135.606 215.722  1.00  0.00           H
ATOM   4818  CB  ALA X 297     164.912 135.740 217.423  1.00  0.00           C
ATOM   4819  HB1 ALA X 297     164.081 135.403 216.803  1.00  0.00           H
ATOM   4820  HB2 ALA X 297     164.963 136.828 217.450  1.00  0.00           H
ATOM   4821  HB3 ALA X 297     164.894 135.228 218.385  1.00  0.00           H
ATOM   4822  C   ALA X 297     167.491 135.636 217.439  1.00  0.00           C
ATOM   4823  O   ALA X 297     168.258 136.326 216.736  1.00  0.00           O
ATOM   4824  N   GLY X 298     167.845 135.355 218.674  1.00  0.00           N
ATOM   4825  H   GLY X 298     167.413 134.510 219.021  1.00  0.00           H
ATOM   4826  CA  GLY X 298     169.041 136.011 219.273  1.00  0.00           C
ATOM   4827  HA2 GLY X 298     168.874 137.088 219.276  1.00  0.00           H
ATOM   4828  HA3 GLY X 298     169.029 135.673 220.310  1.00  0.00           H
ATOM   4829  C   GLY X 298     170.364 135.611 218.517  1.00  0.00           C
ATOM   4830  O   GLY X 298     171.347 136.366 218.674  1.00  0.00           O
ATOM   4831  N   THR X 299     170.424 134.514 217.718  1.00  0.00           N
ATOM   4832  H   THR X 299     169.546 134.024 217.626  1.00  0.00           H
ATOM   4833  CA  THR X 299     171.564 134.110 216.781  1.00  0.00           C
ATOM   4834  HA  THR X 299     172.467 134.098 217.391  1.00  0.00           H
ATOM   4835  CB  THR X 299     171.225 132.794 216.091  1.00  0.00           C
ATOM   4836  HB  THR X 299     170.280 132.922 215.562  1.00  0.00           H
ATOM   4837  CG2 THR X 299     172.174 132.339 215.004  1.00  0.00           C
ATOM   4838 HG21 THR X 299     173.187 132.564 215.337  1.00  0.00           H
ATOM   4839 HG22 THR X 299     172.056 132.960 214.117  1.00  0.00           H
ATOM   4840 HG23 THR X 299     172.083 131.283 214.749  1.00  0.00           H
ATOM   4841  OG1 THR X 299     171.183 131.851 217.095  1.00  0.00           O
ATOM   4842  HG1 THR X 299     170.252 131.687 217.266  1.00  0.00           H
ATOM   4843  C   THR X 299     171.848 135.218 215.753  1.00  0.00           C
ATOM   4844  O   THR X 299     173.037 135.446 215.472  1.00  0.00           O
ATOM   4845  N   GLU X 300     170.810 135.985 215.401  1.00  0.00           N
ATOM   4846  H   GLU X 300     169.933 135.847 215.882  1.00  0.00           H
ATOM   4847  CA  GLU X 300     170.847 136.926 214.246  1.00  0.00           C
ATOM   4848  HA  GLU X 300     171.835 136.893 213.788  1.00  0.00           H
ATOM   4849  CB  GLU X 300     169.772 136.405 213.192  1.00  0.00           C
ATOM   4850  HB2 GLU X 300     170.237 135.506 212.787  1.00  0.00           H
ATOM   4851  HB3 GLU X 300     168.848 136.157 213.714  1.00  0.00           H
ATOM   4852  CG  GLU X 300     169.593 137.375 211.995  1.00  0.00           C
ATOM   4853  HG2 GLU X 300     168.625 137.134 211.556  1.00  0.00           H
ATOM   4854  HG3 GLU X 300     169.562 138.395 212.378  1.00  0.00           H
ATOM   4855  CD  GLU X 300     170.692 137.136 210.972  1.00  0.00           C
ATOM   4856  OE1 GLU X 300     171.847 137.028 211.420  1.00  0.00           O
ATOM   4857  OE2 GLU X 300     170.525 137.195 209.769  1.00  0.00           O
ATOM   4858  C   GLU X 300     170.580 138.302 214.688  1.00  0.00           C
ATOM   4859  O   GLU X 300     171.168 139.260 214.218  1.00  0.00           O
ATOM   4860  N   THR X 301     169.619 138.580 215.550  1.00  0.00           N
ATOM   4861  H   THR X 301     169.072 137.830 215.948  1.00  0.00           H
ATOM   4862  CA  THR X 301     169.064 139.949 215.606  1.00  0.00           C
ATOM   4863  HA  THR X 301     168.673 140.182 214.616  1.00  0.00           H
ATOM   4864  CB  THR X 301     167.840 139.964 216.443  1.00  0.00           C
ATOM   4865  HB  THR X 301     167.442 140.975 216.527  1.00  0.00           H
ATOM   4866  CG2 THR X 301     166.729 139.132 215.920  1.00  0.00           C
ATOM   4867 HG21 THR X 301     166.757 138.043 215.885  1.00  0.00           H
ATOM   4868 HG22 THR X 301     166.595 139.359 214.863  1.00  0.00           H
ATOM   4869 HG23 THR X 301     165.839 139.545 216.396  1.00  0.00           H
ATOM   4870  OG1 THR X 301     168.109 139.472 217.715  1.00  0.00           O
ATOM   4871  HG1 THR X 301     167.259 139.559 218.153  1.00  0.00           H
ATOM   4872  C   THR X 301     170.010 140.981 216.083  1.00  0.00           C
ATOM   4873  O   THR X 301     170.194 142.021 215.404  1.00  0.00           O
ATOM   4874  N   THR X 302     170.593 140.756 217.326  1.00  0.00           N
ATOM   4875  H   THR X 302     170.406 139.894 217.817  1.00  0.00           H
ATOM   4876  CA  THR X 302     171.529 141.632 217.944  1.00  0.00           C
ATOM   4877  HA  THR X 302     171.209 142.673 217.913  1.00  0.00           H
ATOM   4878  CB  THR X 302     171.658 141.312 219.408  1.00  0.00           C
ATOM   4879  HB  THR X 302     172.435 141.967 219.801  1.00  0.00           H
ATOM   4880  CG2 THR X 302     170.273 141.659 220.138  1.00  0.00           C
ATOM   4881 HG21 THR X 302     169.569 140.860 219.908  1.00  0.00           H
ATOM   4882 HG22 THR X 302     169.803 142.587 219.812  1.00  0.00           H
ATOM   4883 HG23 THR X 302     170.338 141.647 221.226  1.00  0.00           H
ATOM   4884  OG1 THR X 302     171.964 139.949 219.560  1.00  0.00           O
ATOM   4885  HG1 THR X 302     172.168 139.804 220.486  1.00  0.00           H
ATOM   4886  C   THR X 302     172.876 141.505 217.248  1.00  0.00           C
ATOM   4887  O   THR X 302     173.388 142.604 216.977  1.00  0.00           O
ATOM   4888  N   SER X 303     173.245 140.278 216.775  1.00  0.00           N
ATOM   4889  H   SER X 303     172.676 139.528 217.141  1.00  0.00           H
ATOM   4890  CA  SER X 303     174.410 139.989 215.891  1.00  0.00           C
ATOM   4891  HA  SER X 303     175.258 140.071 216.571  1.00  0.00           H
ATOM   4892  CB  SER X 303     174.396 138.566 215.342  1.00  0.00           C
ATOM   4893  HB2 SER X 303     174.554 137.814 216.115  1.00  0.00           H
ATOM   4894  HB3 SER X 303     173.440 138.395 214.846  1.00  0.00           H
ATOM   4895  OG  SER X 303     175.354 138.391 214.312  1.00  0.00           O
ATOM   4896  HG  SER X 303     174.961 138.191 213.460  1.00  0.00           H
ATOM   4897  C   SER X 303     174.553 140.979 214.705  1.00  0.00           C
ATOM   4898  O   SER X 303     175.605 141.483 214.536  1.00  0.00           O
ATOM   4899  N   THR X 304     173.401 141.192 213.964  1.00  0.00           N
ATOM   4900  H   THR X 304     172.562 140.692 214.222  1.00  0.00           H
ATOM   4901  CA  THR X 304     173.387 141.964 212.730  1.00  0.00           C
ATOM   4902  HA  THR X 304     174.357 141.770 212.270  1.00  0.00           H
ATOM   4903  CB  THR X 304     172.262 141.597 211.792  1.00  0.00           C
ATOM   4904  HB  THR X 304     171.308 141.636 212.319  1.00  0.00           H
ATOM   4905  CG2 THR X 304     172.102 142.395 210.488  1.00  0.00           C
ATOM   4906 HG21 THR X 304     171.904 143.462 210.581  1.00  0.00           H
ATOM   4907 HG22 THR X 304     171.314 141.867 209.952  1.00  0.00           H
ATOM   4908 HG23 THR X 304     172.957 142.246 209.829  1.00  0.00           H
ATOM   4909  OG1 THR X 304     172.393 140.269 211.440  1.00  0.00           O
ATOM   4910  HG1 THR X 304     171.993 139.758 212.147  1.00  0.00           H
ATOM   4911  C   THR X 304     173.424 143.404 212.965  1.00  0.00           C
ATOM   4912  O   THR X 304     174.220 144.099 212.360  1.00  0.00           O
ATOM   4913  N   THR X 305     172.528 143.839 213.834  1.00  0.00           N
ATOM   4914  H   THR X 305     171.856 143.151 214.141  1.00  0.00           H
ATOM   4915  CA  THR X 305     172.421 145.206 214.431  1.00  0.00           C
ATOM   4916  HA  THR X 305     172.284 145.895 213.597  1.00  0.00           H
ATOM   4917  CB  THR X 305     171.259 145.240 215.406  1.00  0.00           C
ATOM   4918  HB  THR X 305     171.478 144.560 216.229  1.00  0.00           H
ATOM   4919  CG2 THR X 305     171.133 146.567 216.092  1.00  0.00           C
ATOM   4920 HG21 THR X 305     171.351 147.322 215.337  1.00  0.00           H
ATOM   4921 HG22 THR X 305     171.926 146.622 216.838  1.00  0.00           H
ATOM   4922 HG23 THR X 305     170.143 146.767 216.502  1.00  0.00           H
ATOM   4923  OG1 THR X 305     170.084 144.816 214.736  1.00  0.00           O
ATOM   4924  HG1 THR X 305     169.960 143.924 215.070  1.00  0.00           H
ATOM   4925  C   THR X 305     173.818 145.732 214.978  1.00  0.00           C
ATOM   4926  O   THR X 305     174.088 146.955 215.043  1.00  0.00           O
ATOM   4927  N   LEU X 306     174.639 144.822 215.482  1.00  0.00           N
ATOM   4928  H   LEU X 306     174.213 143.915 215.607  1.00  0.00           H
ATOM   4929  CA  LEU X 306     176.018 145.186 215.958  1.00  0.00           C
ATOM   4930  HA  LEU X 306     176.003 146.218 216.308  1.00  0.00           H
ATOM   4931  CB  LEU X 306     176.383 144.107 217.067  1.00  0.00           C
ATOM   4932  HB2 LEU X 306     175.669 144.135 217.891  1.00  0.00           H
ATOM   4933  HB3 LEU X 306     176.466 143.137 216.576  1.00  0.00           H
ATOM   4934  CG  LEU X 306     177.844 144.299 217.647  1.00  0.00           C
ATOM   4935  HG  LEU X 306     178.546 144.228 216.817  1.00  0.00           H
ATOM   4936  CD1 LEU X 306     178.008 145.687 218.308  1.00  0.00           C
ATOM   4937 HD11 LEU X 306     177.397 145.788 219.204  1.00  0.00           H
ATOM   4938 HD12 LEU X 306     177.745 146.450 217.575  1.00  0.00           H
ATOM   4939 HD13 LEU X 306     179.062 145.791 218.568  1.00  0.00           H
ATOM   4940  CD2 LEU X 306     178.290 143.307 218.662  1.00  0.00           C
ATOM   4941 HD21 LEU X 306     179.293 143.513 219.034  1.00  0.00           H
ATOM   4942 HD22 LEU X 306     177.647 143.378 219.540  1.00  0.00           H
ATOM   4943 HD23 LEU X 306     178.127 142.314 218.243  1.00  0.00           H
ATOM   4944  C   LEU X 306     177.067 145.163 214.788  1.00  0.00           C
ATOM   4945  O   LEU X 306     178.036 145.966 214.788  1.00  0.00           O
ATOM   4946  N   ARG X 307     176.883 144.313 213.713  1.00  0.00           N
ATOM   4947  H   ARG X 307     176.006 143.816 213.660  1.00  0.00           H
ATOM   4948  CA  ARG X 307     177.806 144.345 212.633  1.00  0.00           C
ATOM   4949  HA  ARG X 307     178.860 144.278 212.902  1.00  0.00           H
ATOM   4950  CB  ARG X 307     177.486 143.180 211.685  1.00  0.00           C
ATOM   4951  HB2 ARG X 307     177.427 142.216 212.189  1.00  0.00           H
ATOM   4952  HB3 ARG X 307     176.503 143.439 211.291  1.00  0.00           H
ATOM   4953  CG  ARG X 307     178.457 143.042 210.623  1.00  0.00           C
ATOM   4954  HG2 ARG X 307     178.420 143.826 209.867  1.00  0.00           H
ATOM   4955  HG3 ARG X 307     179.469 143.186 211.002  1.00  0.00           H
ATOM   4956  CD  ARG X 307     178.339 141.629 210.006  1.00  0.00           C
ATOM   4957  HD2 ARG X 307     179.096 141.486 209.234  1.00  0.00           H
ATOM   4958  HD3 ARG X 307     178.539 140.905 210.796  1.00  0.00           H
ATOM   4959  NE  ARG X 307     177.064 141.321 209.324  1.00  0.00           N
ATOM   4960  HE  ARG X 307     176.886 141.915 208.527  1.00  0.00           H
ATOM   4961  CZ  ARG X 307     176.072 140.460 209.489  1.00  0.00           C
ATOM   4962  NH1 ARG X 307     175.009 140.471 208.611  1.00  0.00           N
ATOM   4963 HH11 ARG X 307     175.008 140.902 207.697  1.00  0.00           H
ATOM   4964 HH12 ARG X 307     174.406 139.661 208.636  1.00  0.00           H
ATOM   4965  NH2 ARG X 307     176.107 139.599 210.447  1.00  0.00           N
ATOM   4966 HH21 ARG X 307     176.847 139.537 211.132  1.00  0.00           H
ATOM   4967 HH22 ARG X 307     175.319 138.993 210.626  1.00  0.00           H
ATOM   4968  C   ARG X 307     177.597 145.703 211.911  1.00  0.00           C
ATOM   4969  O   ARG X 307     178.468 146.370 211.544  1.00  0.00           O
ATOM   4970  N   TYR X 308     176.323 146.081 211.779  1.00  0.00           N
ATOM   4971  H   TYR X 308     175.631 145.392 212.038  1.00  0.00           H
ATOM   4972  CA  TYR X 308     175.871 147.397 211.346  1.00  0.00           C
ATOM   4973  HA  TYR X 308     176.357 147.501 210.376  1.00  0.00           H
ATOM   4974  CB  TYR X 308     174.341 147.507 211.215  1.00  0.00           C
ATOM   4975  HB2 TYR X 308     173.999 146.478 211.331  1.00  0.00           H
ATOM   4976  HB3 TYR X 308     173.994 148.158 212.017  1.00  0.00           H
ATOM   4977  CG  TYR X 308     173.891 148.024 209.894  1.00  0.00           C
ATOM   4978  CD1 TYR X 308     172.765 147.443 209.262  1.00  0.00           C
ATOM   4979  HD1 TYR X 308     172.194 146.643 209.710  1.00  0.00           H
ATOM   4980  CE1 TYR X 308     172.456 147.852 207.939  1.00  0.00           C
ATOM   4981  HE1 TYR X 308     171.644 147.327 207.458  1.00  0.00           H
ATOM   4982  CZ  TYR X 308     173.314 148.754 207.304  1.00  0.00           C
ATOM   4983  OH  TYR X 308     173.143 148.956 205.974  1.00  0.00           O
ATOM   4984  HH  TYR X 308     173.703 149.694 205.722  1.00  0.00           H
ATOM   4985  CE2 TYR X 308     174.251 149.533 208.065  1.00  0.00           C
ATOM   4986  HE2 TYR X 308     174.791 150.305 207.538  1.00  0.00           H
ATOM   4987  CD2 TYR X 308     174.566 149.142 209.348  1.00  0.00           C
ATOM   4988  HD2 TYR X 308     175.325 149.640 209.934  1.00  0.00           H
ATOM   4989  C   TYR X 308     176.490 148.565 212.211  1.00  0.00           C
ATOM   4990  O   TYR X 308     177.045 149.461 211.647  1.00  0.00           O
ATOM   4991  N   ALA X 309     176.346 148.519 213.518  1.00  0.00           N
ATOM   4992  H   ALA X 309     175.978 147.685 213.951  1.00  0.00           H
ATOM   4993  CA  ALA X 309     176.775 149.637 214.397  1.00  0.00           C
ATOM   4994  HA  ALA X 309     176.345 150.541 213.966  1.00  0.00           H
ATOM   4995  CB  ALA X 309     176.130 149.531 215.835  1.00  0.00           C
ATOM   4996  HB1 ALA X 309     176.488 148.624 216.322  1.00  0.00           H
ATOM   4997  HB2 ALA X 309     175.058 149.340 215.799  1.00  0.00           H
ATOM   4998  HB3 ALA X 309     176.324 150.372 216.501  1.00  0.00           H
ATOM   4999  C   ALA X 309     178.281 149.796 214.481  1.00  0.00           C
ATOM   5000  O   ALA X 309     178.765 150.938 214.452  1.00  0.00           O
ATOM   5001  N   LEU X 310     179.128 148.743 214.544  1.00  0.00           N
ATOM   5002  H   LEU X 310     178.764 147.802 214.511  1.00  0.00           H
ATOM   5003  CA  LEU X 310     180.590 148.901 214.317  1.00  0.00           C
ATOM   5004  HA  LEU X 310     180.977 149.696 214.954  1.00  0.00           H
ATOM   5005  CB  LEU X 310     181.355 147.620 214.763  1.00  0.00           C
ATOM   5006  HB2 LEU X 310     181.076 146.844 214.051  1.00  0.00           H
ATOM   5007  HB3 LEU X 310     182.429 147.721 214.608  1.00  0.00           H
ATOM   5008  CG  LEU X 310     181.116 147.246 216.235  1.00  0.00           C
ATOM   5009  HG  LEU X 310     180.130 147.537 216.597  1.00  0.00           H
ATOM   5010  CD1 LEU X 310     181.290 145.823 216.507  1.00  0.00           C
ATOM   5011 HD11 LEU X 310     181.181 145.659 217.579  1.00  0.00           H
ATOM   5012 HD12 LEU X 310     182.288 145.422 216.329  1.00  0.00           H
ATOM   5013 HD13 LEU X 310     180.460 145.247 216.096  1.00  0.00           H
ATOM   5014  CD2 LEU X 310     182.095 148.015 217.102  1.00  0.00           C
ATOM   5015 HD21 LEU X 310     181.830 147.849 218.146  1.00  0.00           H
ATOM   5016 HD22 LEU X 310     183.157 147.820 216.956  1.00  0.00           H
ATOM   5017 HD23 LEU X 310     182.048 149.055 216.779  1.00  0.00           H
ATOM   5018  C   LEU X 310     180.996 149.395 212.891  1.00  0.00           C
ATOM   5019  O   LEU X 310     181.985 150.047 212.707  1.00  0.00           O
ATOM   5020  N   LEU X 311     180.197 149.258 211.864  1.00  0.00           N
ATOM   5021  H   LEU X 311     179.376 148.702 212.059  1.00  0.00           H
ATOM   5022  CA  LEU X 311     180.218 149.991 210.597  1.00  0.00           C
ATOM   5023  HA  LEU X 311     181.268 150.078 210.319  1.00  0.00           H
ATOM   5024  CB  LEU X 311     179.496 149.218 209.493  1.00  0.00           C
ATOM   5025  HB2 LEU X 311     180.147 148.361 209.325  1.00  0.00           H
ATOM   5026  HB3 LEU X 311     178.589 148.826 209.952  1.00  0.00           H
ATOM   5027  CG  LEU X 311     179.233 149.978 208.202  1.00  0.00           C
ATOM   5028  HG  LEU X 311     178.674 150.890 208.413  1.00  0.00           H
ATOM   5029  CD1 LEU X 311     180.540 150.301 207.459  1.00  0.00           C
ATOM   5030 HD11 LEU X 311     181.111 149.396 207.253  1.00  0.00           H
ATOM   5031 HD12 LEU X 311     181.107 150.984 208.092  1.00  0.00           H
ATOM   5032 HD13 LEU X 311     180.240 150.783 206.528  1.00  0.00           H
ATOM   5033  CD2 LEU X 311     178.329 149.199 207.310  1.00  0.00           C
ATOM   5034 HD21 LEU X 311     178.770 148.250 207.004  1.00  0.00           H
ATOM   5035 HD22 LEU X 311     177.391 149.092 207.855  1.00  0.00           H
ATOM   5036 HD23 LEU X 311     178.123 149.804 206.428  1.00  0.00           H
ATOM   5037  C   LEU X 311     179.778 151.397 210.754  1.00  0.00           C
ATOM   5038  O   LEU X 311     180.542 152.239 210.400  1.00  0.00           O
ATOM   5039  N   LEU X 312     178.630 151.822 211.371  1.00  0.00           N
ATOM   5040  H   LEU X 312     178.106 151.101 211.846  1.00  0.00           H
ATOM   5041  CA  LEU X 312     178.237 153.202 211.531  1.00  0.00           C
ATOM   5042  HA  LEU X 312     178.444 153.698 210.582  1.00  0.00           H
ATOM   5043  CB  LEU X 312     176.807 153.388 211.996  1.00  0.00           C
ATOM   5044  HB2 LEU X 312     176.844 153.093 213.045  1.00  0.00           H
ATOM   5045  HB3 LEU X 312     176.515 154.435 212.078  1.00  0.00           H
ATOM   5046  CG  LEU X 312     175.634 152.720 211.258  1.00  0.00           C
ATOM   5047  HG  LEU X 312     175.844 151.662 211.421  1.00  0.00           H
ATOM   5048  CD1 LEU X 312     174.283 152.964 211.887  1.00  0.00           C
ATOM   5049 HD11 LEU X 312     174.432 152.813 212.957  1.00  0.00           H
ATOM   5050 HD12 LEU X 312     173.561 152.245 211.501  1.00  0.00           H
ATOM   5051 HD13 LEU X 312     173.980 153.950 211.535  1.00  0.00           H
ATOM   5052  CD2 LEU X 312     175.580 152.931 209.723  1.00  0.00           C
ATOM   5053 HD21 LEU X 312     174.716 152.431 209.285  1.00  0.00           H
ATOM   5054 HD22 LEU X 312     175.331 153.992 209.688  1.00  0.00           H
ATOM   5055 HD23 LEU X 312     176.486 152.726 209.152  1.00  0.00           H
ATOM   5056  C   LEU X 312     179.165 154.024 212.399  1.00  0.00           C
ATOM   5057  O   LEU X 312     179.087 155.278 212.273  1.00  0.00           O
ATOM   5058  N   LEU X 313     179.938 153.424 213.315  1.00  0.00           N
ATOM   5059  H   LEU X 313     179.738 152.448 213.484  1.00  0.00           H
ATOM   5060  CA  LEU X 313     181.056 153.990 214.083  1.00  0.00           C
ATOM   5061  HA  LEU X 313     180.772 155.001 214.375  1.00  0.00           H
ATOM   5062  CB  LEU X 313     181.193 153.116 215.353  1.00  0.00           C
[truncated: 6,522,561 more chars]
