# Supplementary material for: Differing Membrane Interactions of Two Highly Similar Drug-Metabolizing Cytochrome P450 Isoforms: CYP 2C9 and CYP 2C19
Source: Int J Mol Sci. 2019 Sep 4;20(18):4328. doi: 10.3390/ijms20184328 (PMC6770661; doi:10.3390/ijms20184328)
Supplement: Supplementary file 1 [file ijms-20-04328-s001.zip › CYP_2C9_2C19_pdb/README.txt]

08.2019
These files are pdb files for the paper Mustafa, G., et al., Differing Membrane Interactions of Two Highly Similar Drug Metabolizing Cytochrome P450 Isoforms: CYP 2C9 and CYP 2C19, IJMS (2019)

1. First (energy minimized) and last frames from AA MD of apoCYP2C9 (SIM1)  (shown in Fig 5A and Fig 6A-C and Fig S7A).
2C9-SIM1_min_noW.pdb
2C9-SIM1_final_noW.pdb

2. Last frame from AA MD of apoCYP2C19 (SIM1) (shown in Fig 5B and Fig S7C) 
2C19-SIM1_final_noW.pdb

3. Last frame from AA MD of holoCYP2C9 (SIM2)  (shown in Fig 5B and Fig S7B).
2C9-SIM2_6982_noWAT.pdb

4. Last frame from AA MD of holoCYP2C19 (SIM2) (shown in Fig S7D) 
2C19-SIM2_2631_noWAT.pdb

5. Last frame from AA MD of apoCYP2C9 (SIM3)  
2C9-SIM3_final_noW.pdb

6. Last frame from AA MD of apoCYP2C19 (SIM3) 
2C19-SIM3_final_noW.pdb
